# Supplementary material for: Role of distinct fibroblast lineages and immune cells in dermal repair following UV radiation-induced tissue damage
Source: eLife journal article supplement (doi:10.7554/elife.71052), 2021-12-23
Supplement: figures [file elife-71052-figures-v2.pdf]

---

## Figures and figure supplements

Role of distinct fibroblast lineages and immune cells in dermal repair following UV radiation-induced tissue damage

**Emanuel Rognoni et al**

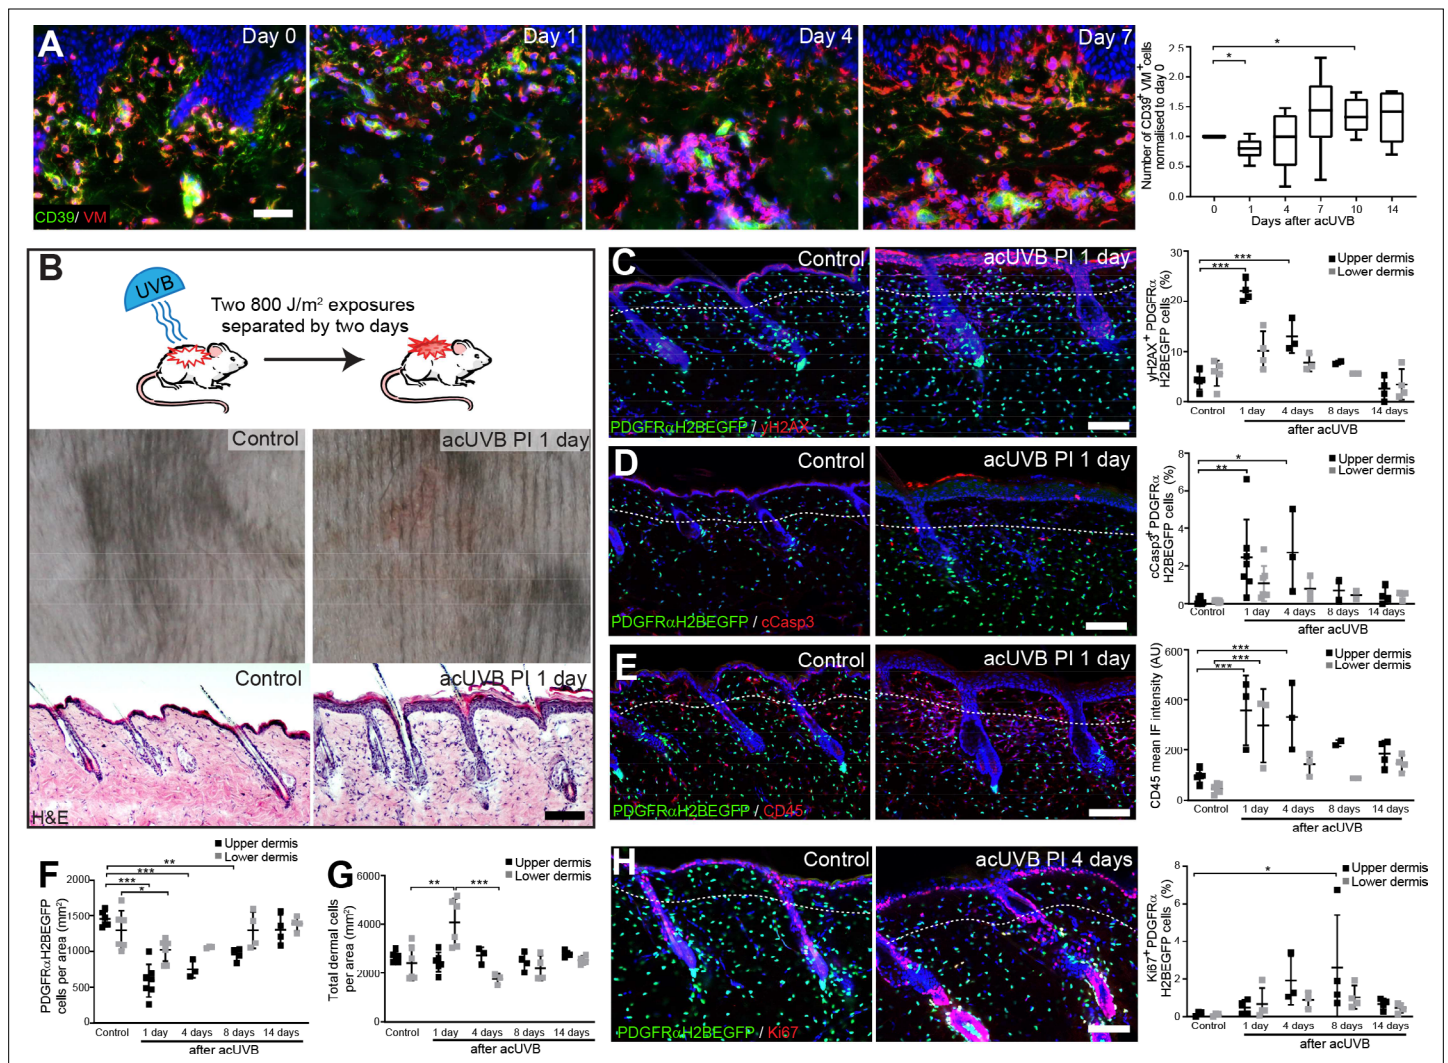

**Figure 1.** Acute UVB exposure depletes fibroblasts in the papillary dermis. (A) Immunostaining of human skin for CD39 (green) and vimentin (VM) (red) and quantification of double-positive cells per field of view relative to control skin at indicated time points after acute ultraviolet radiation (acUVR) exposure ( $n = 6$  biological replicates). (B) Experimental design of mouse acUVR model (top panel), representative images of skin erythema (middle panel), and H&E skin section (bottom panel), showing epidermal hyperplasia and increased dermal cell density 1 day after acUVR. (C, D) Representative PDGFR $\alpha$ H2BEGFP sections (green) stained for  $\gamma$ H2AX (C), and cCasp3 (D) (red) of control and treated skin and quantification of double-positive cells at indicated time points post-acUVR. Note that the epidermis and upper dermis show pronounced DNA damage ( $\gamma$ H2AX<sup>+</sup>) with clusters of apoptotic cells (cCasp3<sup>+</sup>) 24 hr post-acUVR. (E) Immunostaining of PDGFR $\alpha$ H2BEGFP back skin (green) for all lymphocytes (CD45; red) and quantification of the CD45 mean fluorescence intensity at indicated time points post-UVR. (F, G) Quantification of dermal fibroblast density (PDGFR $\alpha$ H2BEGFP<sup>+</sup>) (F) and total dermal density (DAPI<sup>+</sup>) (G) 24 hr after acUVR in the upper and lower dermis. (H) Representative PDGFR $\alpha$ H2BEGFP sections (green) stained for Ki67 (red) of control and treated skin and quantification of double-positive cells at indicated time points post-acUVR. Note that the epidermis and upper dermis show increased proliferation 4 days after acUVR. Nuclei labelled with DAPI and dashed white line delineates upper and lower dermis. Scale bars, 50  $\mu$ m. Data are mean  $\pm$  SD. \* $p < 0.05$ , \*\* $p < 0.01$ , \*\*\* $p < 0.001$ . Source data of shown quantifications are summarised in **Figure 1—source data 1**.

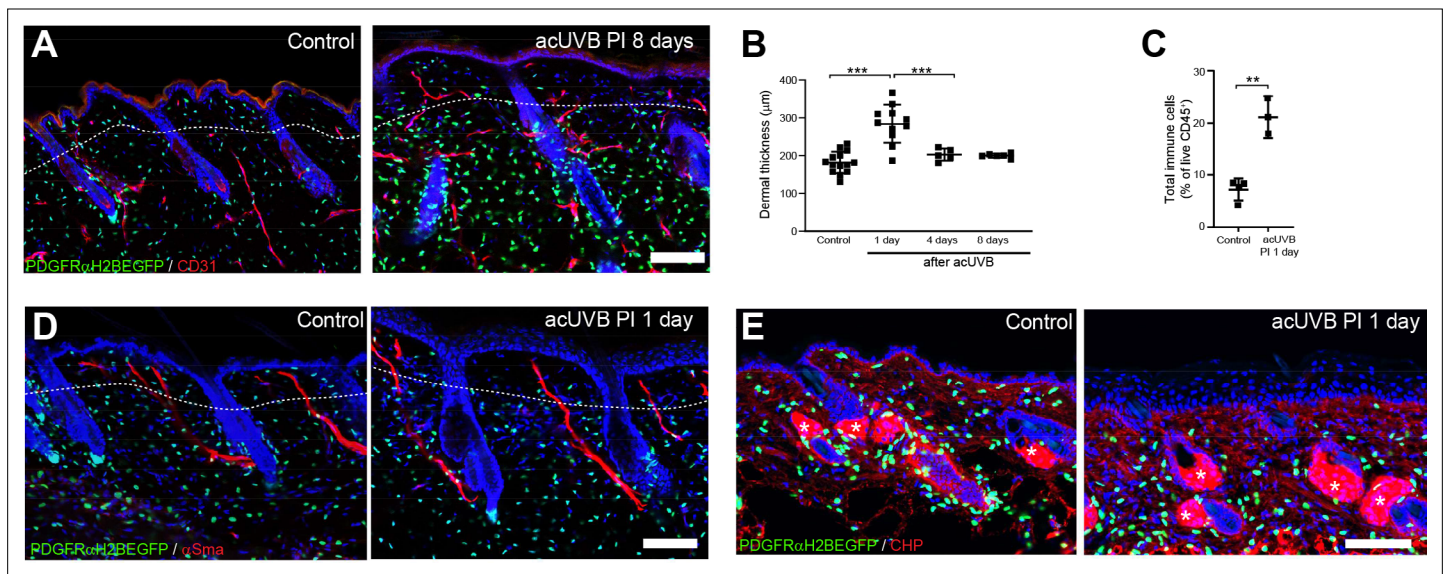

**Figure 1—figure supplement 1.** Dermal changes after acute ultraviolet radiation (UVR) exposure. **(A)** Immunostaining of control and acute UVR (acUVR)-exposed PDGFR $\alpha$ H2BEGFP back skin (green) for blood vessels (CD31; red) after 8 days. **(B)** Changes in dermal thickness of the papillary and reticular layer after acUVB exposure at indicated time points. **(C)** FACS analysis of live CD45<sup>+</sup> skin cells at 1 day after acUVB quantified as percentage from total live skin cell isolation. **(D, E)** Immunostaining of control and acUVR-exposed PDGFR $\alpha$ H2BEGFP back skin (green) for  $\alpha$ Sma (red) **(D)** and collagen (red) using the collagen hybridising peptide (CHP)-biotin probe after 1 daypost-UVR **(E)**. White asterisks indicate unspecific CHP staining in sebaceous glands in **(E)**. Nuclei were labelled with DAPI (blue), and dashed white line delineates upper and lower dermis. Scale bars, 50  $\mu$ m. Data are mean  $\pm$  SD. \*\* $p$ <0.01, \*\*\* $p$ <0.001. Source data of shown quantifications are summarised in **Figure 1—figure supplement 1—source data 1**.

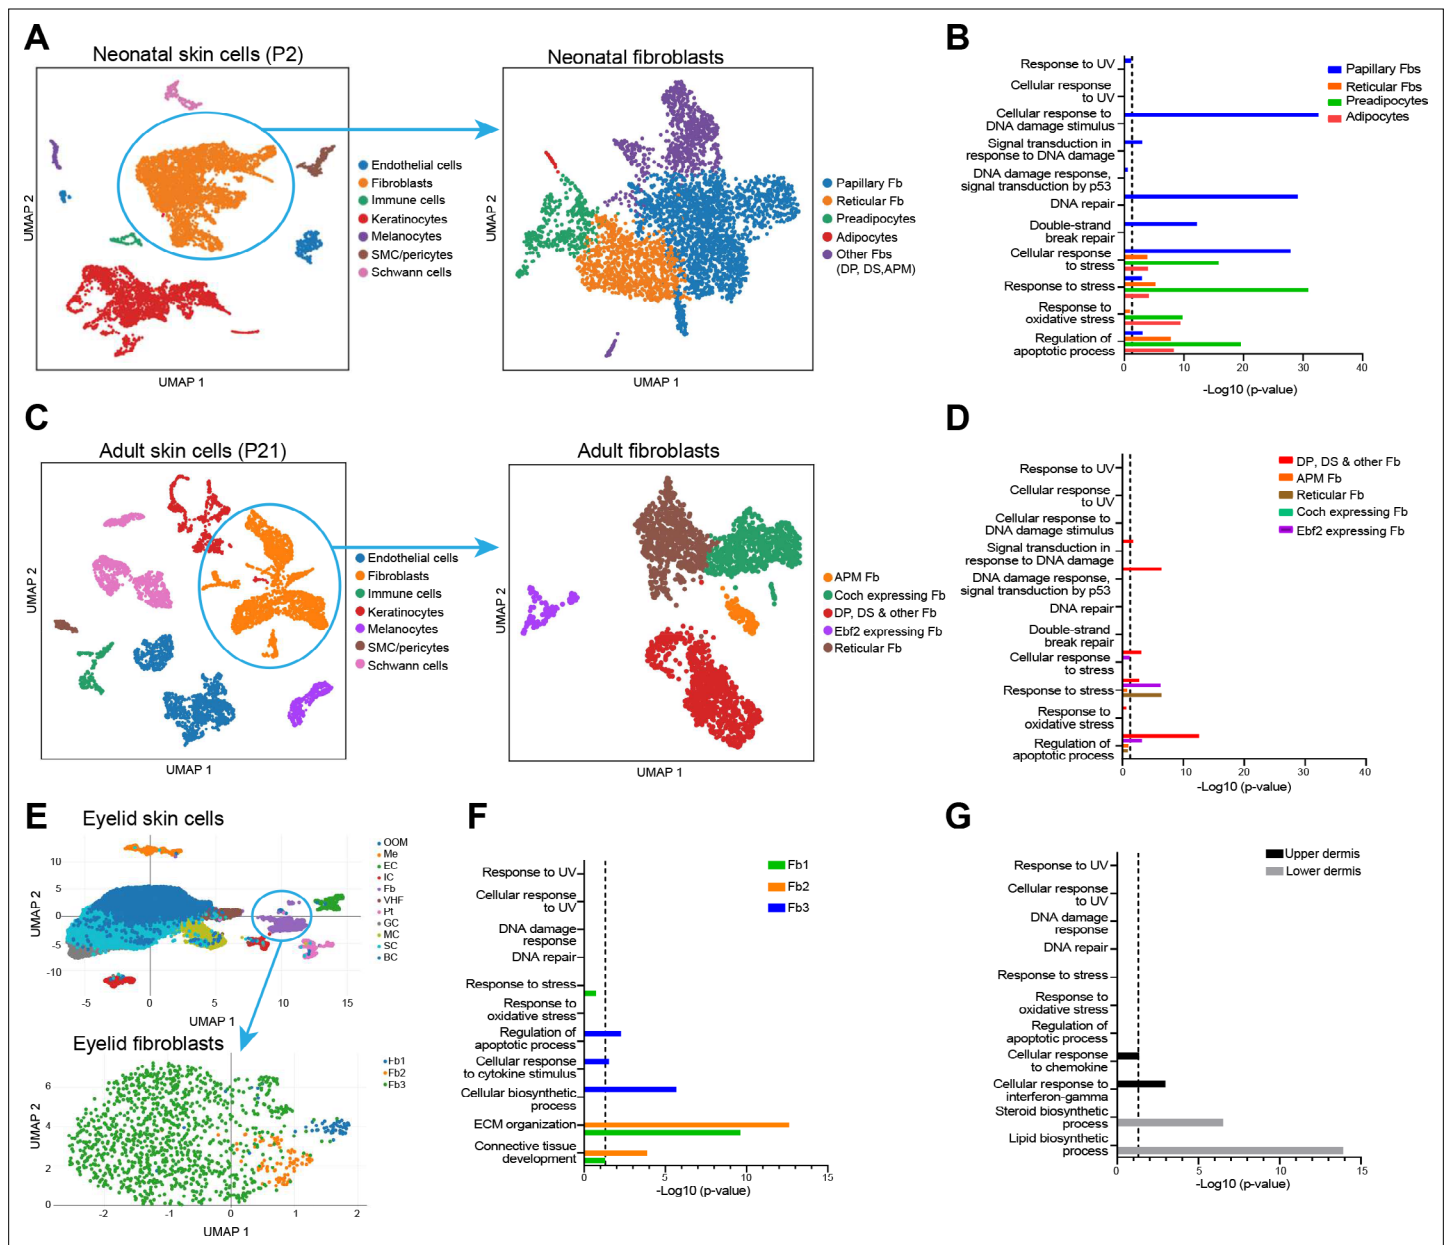

**Figure 1—figure supplement 2.** Transcriptomic analysis of mouse and human skin fibroblasts. **(A)** UMAP visualisation of neonatal (P2) mouse skin cell populations (left panel) and fibroblast cluster analysis of the UMAP plot (right panel) (Phan et al., 2020). Each cell is colour coded according to the label. **(B)** Gene Ontology (GO) term analysis of upregulated entities in different fibroblast subpopulation clusters related to UV response, DNA repair/damage, apoptosis, and cell stress. **(C)** UMAP visualisation of adult (P21) skin cell populations (left panel) and fibroblast cluster analysis of the UMAP plot (right panel) (Phan et al., 2020). Each cell is colour coded according to the label. **(D)** GO term analysis of upregulated entities in different fibroblast subpopulation clusters related to UV response, DNA repair/damage, apoptosis, and cell stress. **(E)** UMAP visualisation of human eyelid skin cell populations (upper panel) and fibroblast cluster analysis of the UMAP plot (lower panel). Each cell is colour coded according to the label. Fb1&2 subpopulations have been identified as reticular fibroblast and Fb3 as papillary fibroblasts (Zou et al., 2021). **(F)** GO term analysis of upregulated entities in different fibroblast subpopulation clusters related to UV response, DNA repair/damage, apoptosis, and cell stress as well as fibroblast subpopulation functions (extracellular matrix [ECM], biosynthesis, and immune signalling). **(G)** GO term analysis of upregulated entities in microdissected upper and lower dermis (Philippeos et al., 2018) related to UV response, DNA repair/damage, apoptosis, and cell stress as well as dermal layer functions (immune signalling and lipid metabolism). **(B, D, G)** Dotted line indicates significance threshold of  $p=0.05$ . P, postnatal day; Fb, fibroblast; APM, arrector pili muscle; DP, dermal papilla; DS, dermal sheath; OOM, orbicularis oculi muscle; MC, mitotic cell; BC, basal cell; VHF, vellus hair follicle; Me, melanocyte; SC, spinous cell; GC, granular cell; EC, endothelial cell; IC, immune cell; LC, Langerhans cell; Pt, pericyte. Source data of GO term analysis are summarised in **Figure 1—figure supplement 2—source data 1**.



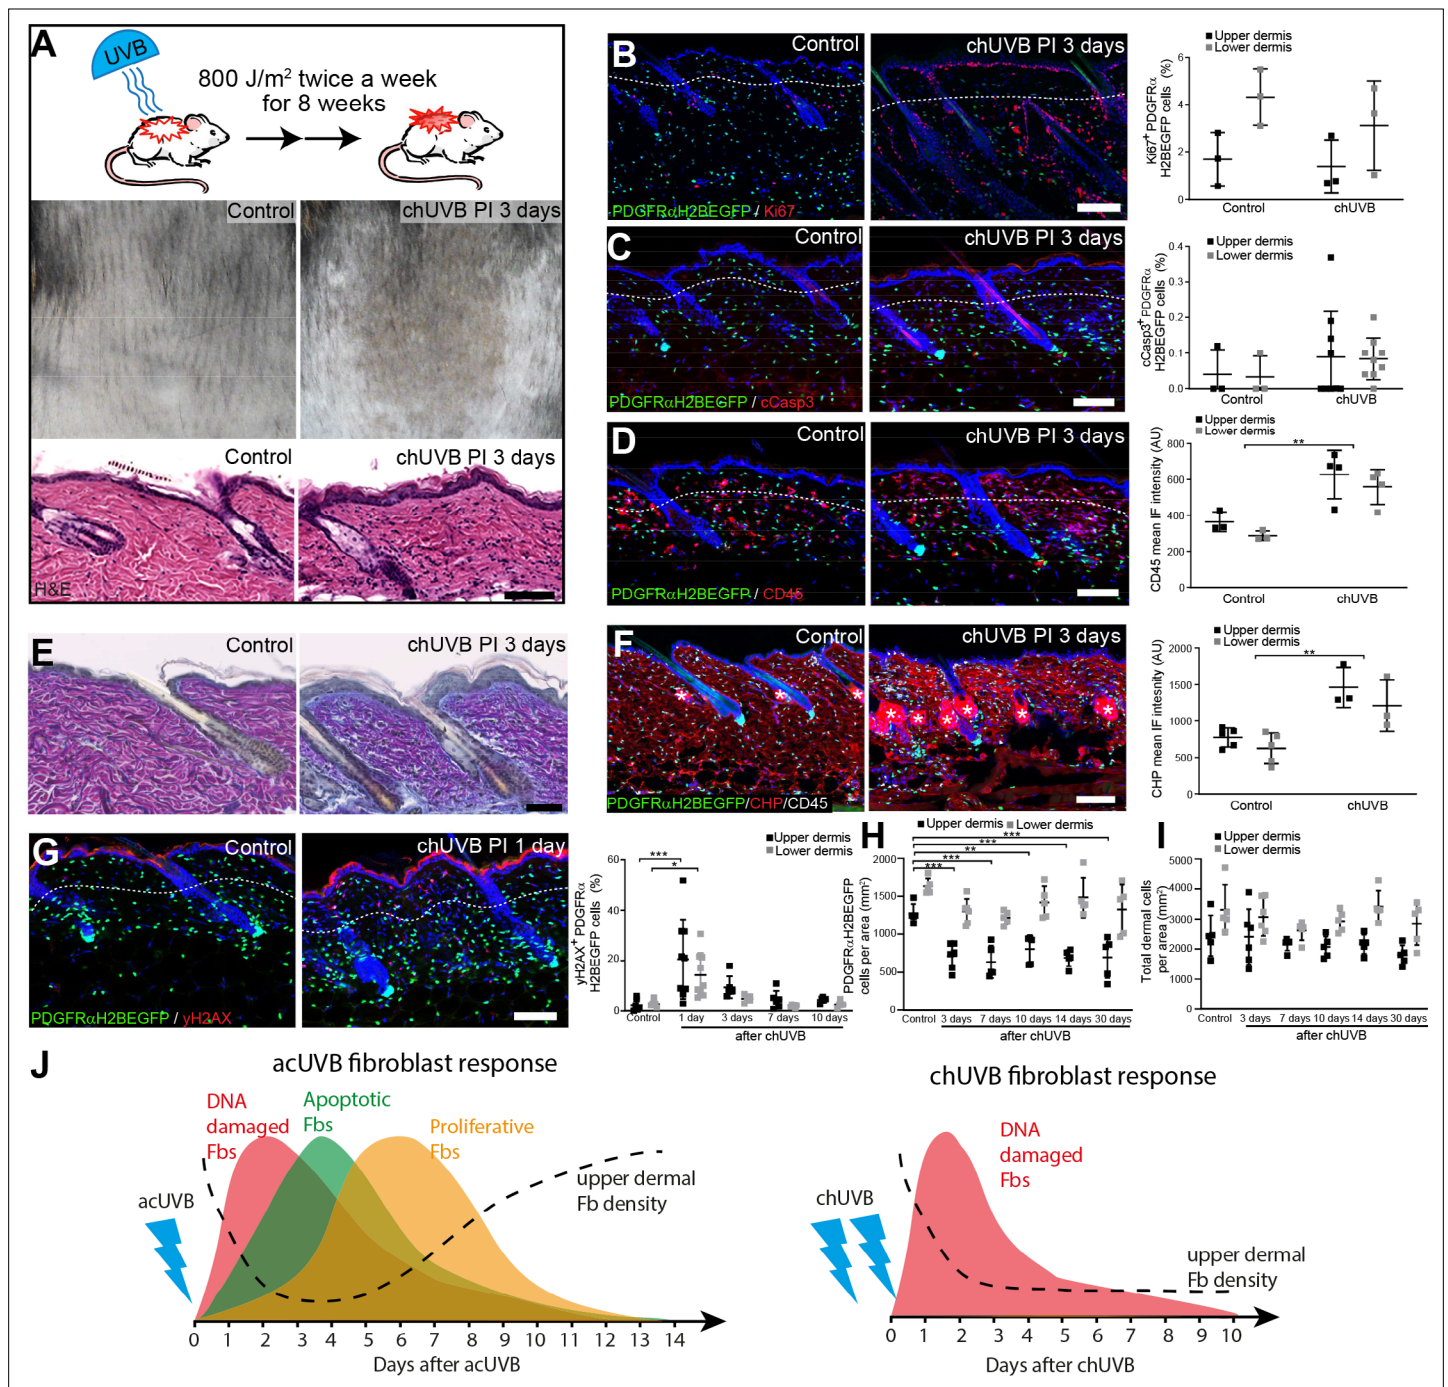

**Figure 2.** Chronic UVB irradiation leads to a permanent loss of papillary fibroblast in the upper dermis and changes in the extracellular matrix (ECM) environment. **(A)** Experimental design (top panel), representative skin tanning (middle panel), and H&E section (bottom panel), showing epidermal hyperplasia, ECM changes, and increased dermal cell density after chronic UVB (chUVB). **(B–D)** Representative PDGFR $\alpha$ H2BEGFP sections (green) stained for Ki67 (**B**), cCasp3 (**C**), and CD45 (**D**) (red) of control and treated skin and quantification of either double-positive cells (Ki67 and cCasp3) or mean fluorescence intensity (CD45). While lymphocytes (CD45+ cells) are increased in the dermis, pronounced proliferation (Ki67+) and apoptosis (cCasp3+) are only observed in the epidermis after chUVB. **(E)** Herovici staining of control and chUVB-exposed skin sections. Note that pink/purple staining indicates mature collagen, whereas light blue-stained collagen in chUVB skin below the basement membrane is immature and actively remodelled. **(F)** Immunofluorescence staining of control and chUVB PDGFR $\alpha$ H2BEGFP skin (green) for CD45 (white) and collagen (red) using the collagen hybridising peptide (CHP)-biotin probe. Mean CHP fluorescence signal was quantified, and increased CHP signal in chUVB skin indicates a more fibrillar, open, and/or damaged collagen structure. White asterisks indicate unspecific CHP staining in sebaceous glands. **(G)** Immunostaining of control and chUVB-exposed PDGFR $\alpha$ H2BEGFP back skin (green) for yH2AX (red) and quantification of double-positive cells at indicated time points.

Figure 2 continued on next page

*Figure 2 continued*

Note that the epidermis and dermis show pronounced DNA damage ( $\gamma$ H2AX+) at 24 hr after ultraviolet radiation (UVR) which is repaired over time. **(H, I)** Quantification of dermal fibroblast (PDGFR $\alpha$ H2BEGFP+) **(H)** and total dermal cell density (DAPI+) **(I)** after chUVB. **(J)** Comparison of acute UVR (acUVR) and chUVR fibroblast tissue damage repair response. While acUVR induced a transient fibroblast depletion caused by DNA damage, fibroblast apoptosis, and following proliferation, chUVR led to a persistent loss of fibroblasts in the papillary dermis. Nuclei were labelled with DAPI (blue), and dashed white line delineates upper and lower dermis. Scale bars, 50  $\mu$ m. Data are mean  $\pm$  SD. \* $p < 0.05$ , \*\* $p < 0.01$ , \*\*\* $p < 0.001$ . Source data of shown quantifications are summarised in **Figure 2—source data 1**.

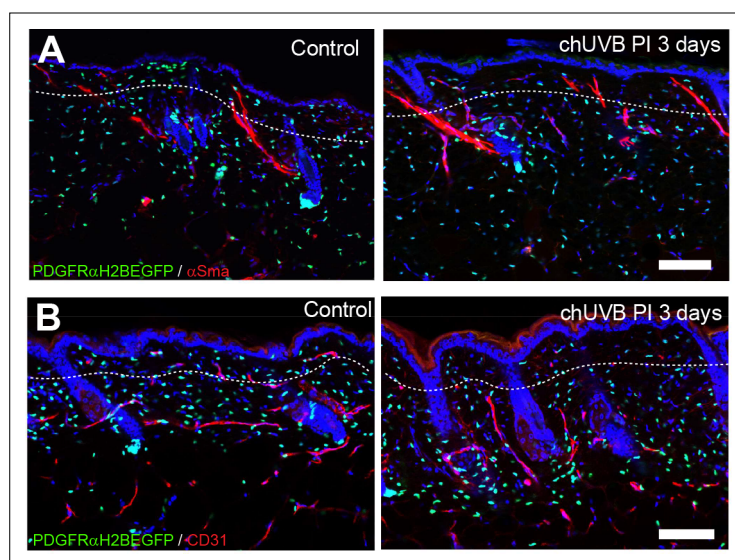

**Figure 2—figure supplement 1.** Dermal changes after chronic ultraviolet radiation (UVR) exposure. (**A**, **B**) Immunostaining of control and chronic UVR (chUVR)-exposed PDGFRαH2BEGFP back skin (green) for αSma (red) (**A**) and blood vessels (CD31; red) after chUVB exposure (**B**). Nuclei were labelled with DAPI (blue), and dashed white line delineates upper and lower dermis. Scale bars, 50 μm.



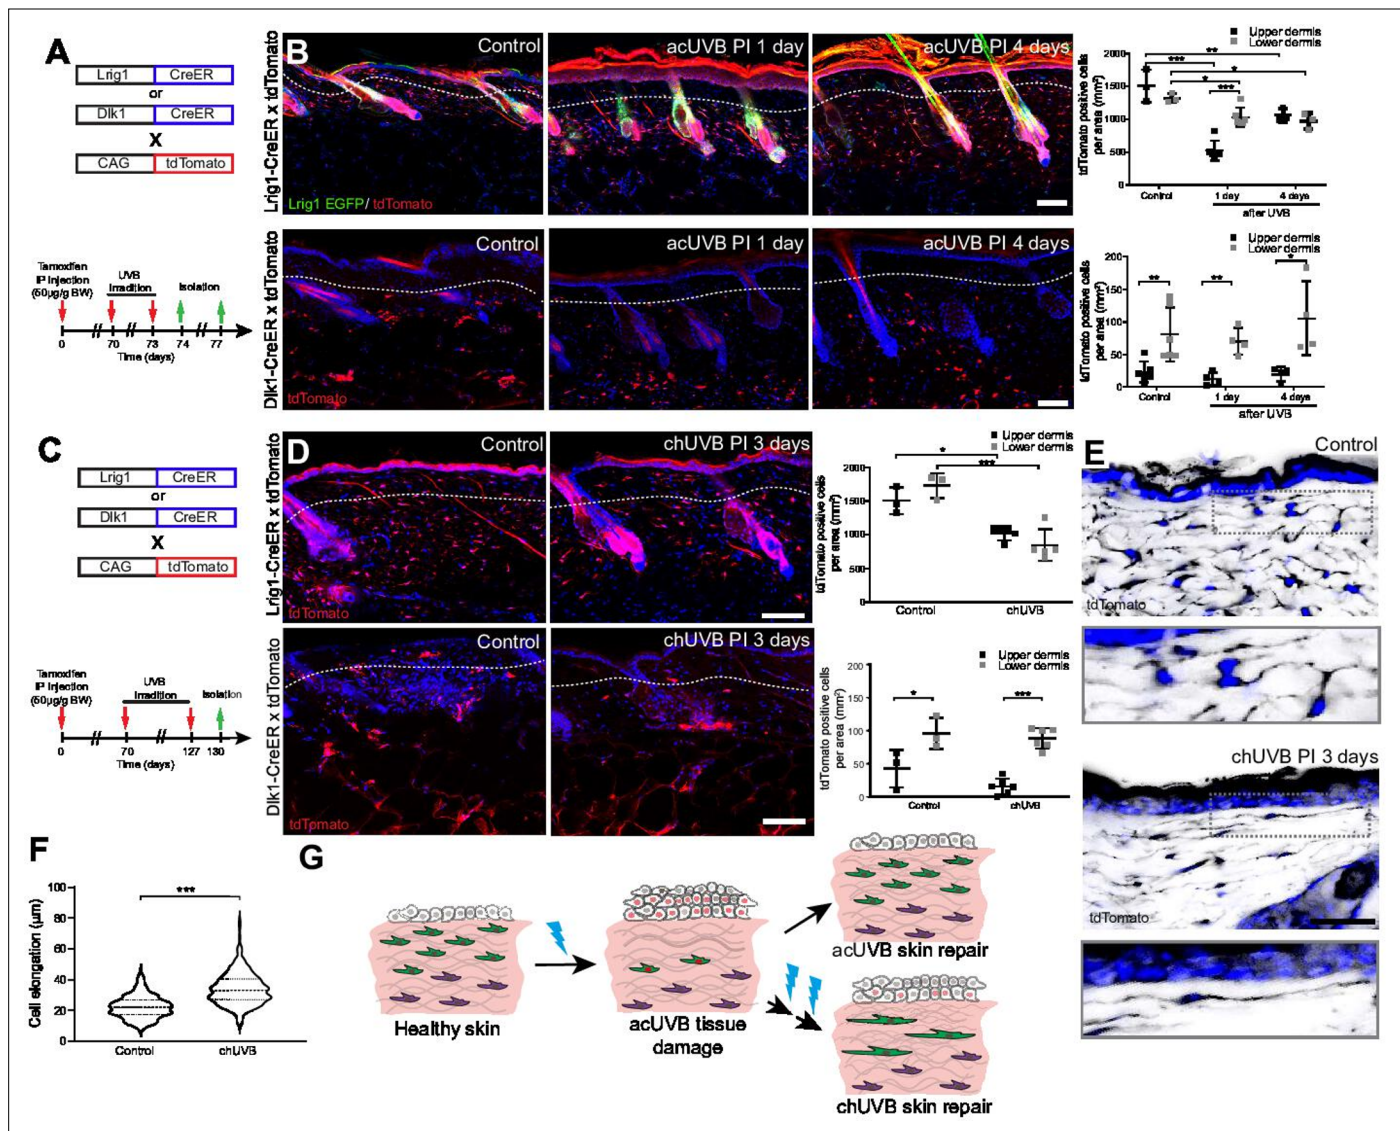

**Figure 3.** Only fibroblast lineages of the papillary dermis contribute to ultraviolet radiation (UVR)-induced tissue repair and fibroblasts in chronic UVR-exposed skin are more elongated. **(A, B)** In vivo lineage tracing of distinct dermal fibroblast populations during tissue damage repair after acute UVB (acUVB). **(A)** Experimental design shows breeding strategy and skin isolation time points to follow fibroblast lineages during tissue repair. **(B)** Representative immunofluorescence image and quantification of Lrig1-CreER × tdTomato (top panels) and Dlk1-CreER × tdTomato (lower panels) back skin of control and acUVB-exposed skin after 1 and 4 days. Quantification shows labelled cells in the upper and lower dermis at indicated time points. **(C, D)** In vivo lineage tracing of distinct dermal fibroblast populations during chUVB. **(C)** Experimental design shows breeding and lineage-tracing strategy for chronic UVB (chUVB)-exposed skin. **(D)** Immunofluorescence image and quantification of Lrig1-CreER × tdTomato (top panels) and Dlk1-CreER × tdTomato (lower panels) back skin of control and chUVB-exposed skin 3 days after last UVR exposure. Quantification shows labelled tdTomato+ cells in the upper and lower dermis. **(E, F)** Closeup of Lrig1-CreER × tdTomato lineage-traced skin section showing cytoplasmic tdTomato signal (black) **(E)** and quantification of papillary fibroblast elongation in control and chUVB-exposed skin **(F)** (n = 300 cells from four biological replicates). Boxed areas in **(E)** indicate magnified fibroblasts shown below. Note that although fibroblast density in chUVB skin is reduced **(D)**, fibroblast membrane protrusions are increased. **(G)** Summary of UVR-induced tissue damage and skin regeneration after acute and prolonged (chronic) UVB exposure. In healthy skin, papillary (green) and reticular (violet) fibroblasts are quiescent. After acUVB exposure, papillary fibroblasts are depleted and epidermal and dermal cells start proliferating (red nucleus) during the tissue repair response. While fibroblast density and skin homeostasis are restored after acUVB tissue damage, repeated UVB exposure leads to a permanent loss and elongation of papillary fibroblasts and changes in the extracellular matrix (ECM) structure characteristic of aged skin. Nuclei were labelled with DAPI (blue), and dashed white line delineates upper and lower dermis. Scale bars, 50 µm. Data are mean ± SD. \*p < 0.05, \*\*p < 0.01, \*\*\*p < 0.001. Source data of shown quantifications are summarised in Figure 3—source data 1.



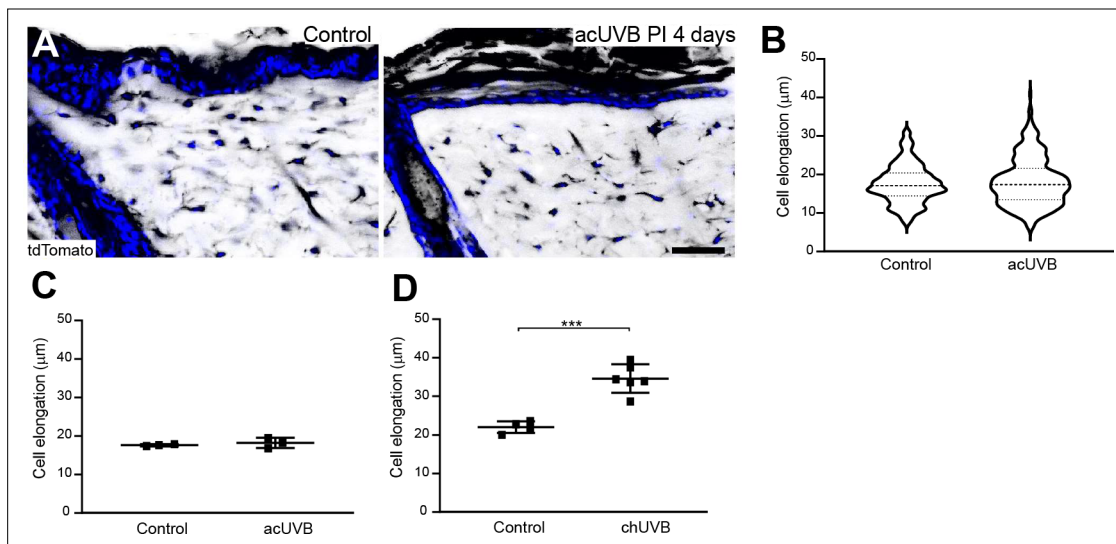

**Figure 3—figure supplement 1.** Fibroblast shape and size at 4 days after acute UVB (acUVB) exposure in the papillary dermis. (**A, B**) Lrig1-CreER  $\times$  tdTomato lineage-traced skin sections at 4 days post-acUVB or control, showing cytoplasmic tdTomato signal (black) (**A**) and quantification of papillary fibroblast elongation in control and acUVB-exposed skin ( $n = 300$  cells from three biological replicates) (**B**). Note that in contrast to chronic UVB (chUVB) (**Figure 3E and F**), acUVB did not induce significant changes in papillary fibroblast cell shape. Nuclei were labelled with DAPI (blue) Scale bars,  $50 \mu\text{m}$ . Data are mean  $\pm$  SD. \*\*\* $p < 0.001$ . Source data of shown quantifications are summarised in **Figure 3—figure supplement 1—source data 1**.

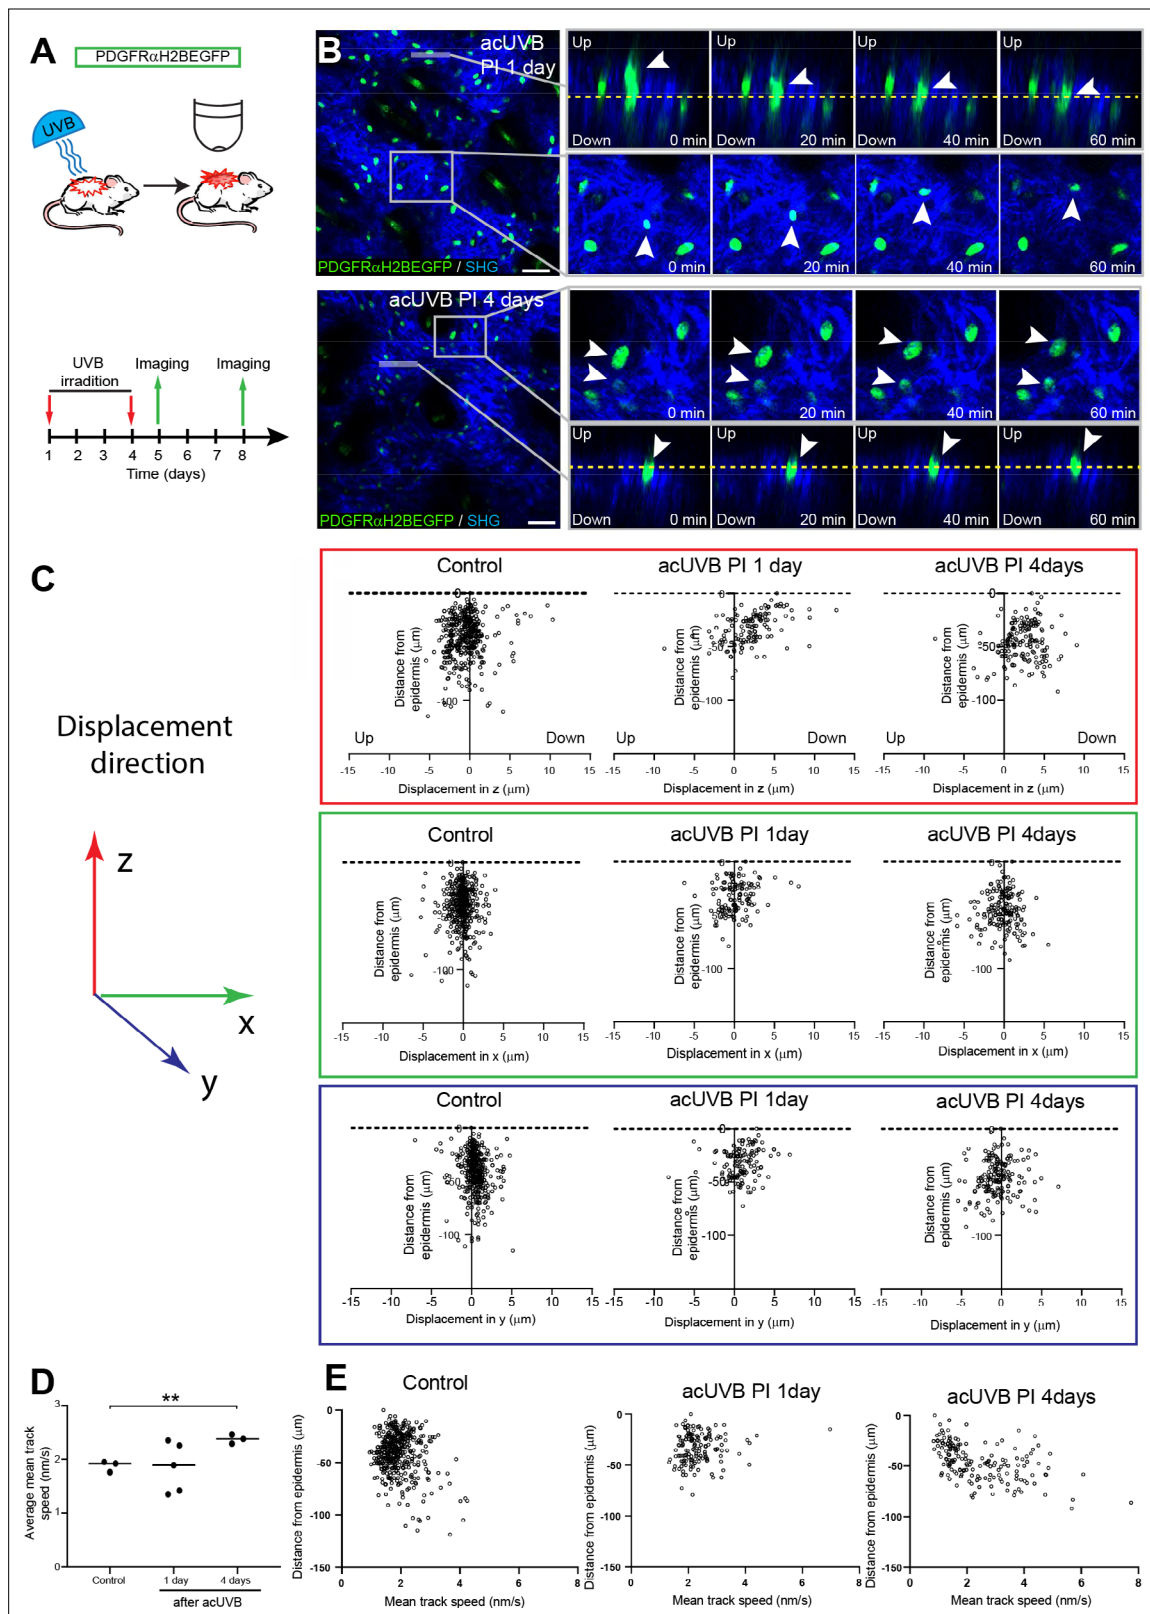

**Figure 4.** Fibroblasts in the papillary dermis become more motile during the ultraviolet radiation (UVR) tissue repair response. **(A)** Experimental design for live imaging of adult PDGFR $\alpha$ H2BEGFP back skin during acute UVB (acUVB)-induced tissue damage repair. **(B)** Representative time-lapse images of adult PDGFR $\alpha$ H2BEGFP (green) dermis 1 day (upper panel, relates to **Figure 4—video 2**) and 4 days (lower panel, relates to **Figure 4—video 3**) post-acUVB with collagen shown as second harmonic generation (SHG) in blue at indicated imaging time points. Line indicates orthogonal closeup to follow

*Figure 4 continued on next page*

*Figure 4 continued*

vertical cell displacement, and box shows fibroblast movement in the horizontal plane. Arrowheads in closeups indicate cells migrating, and dashed line is for orientation. **(C)** Scatter plots of the displacement along the indicated axis (z-, red; x-, green; y-axis, blue) of individual control and acUVB-treated cells in their relative z-location (distance from epidermis). **(D)** Average mean cell displacement speed of imaged control and acUVB-exposed back skin after 1 and 4 days. **(E)** Scatter plots of mean velocity of individual cells in their relative z-location from representative control and acUVB-treated animals after 1 and 4 days post-UVB. Scale bars, 50  $\mu\text{m}$ . \* $p < 0.05$ . Source data of quantifications are summarised in **Figure 4—source data 1**.

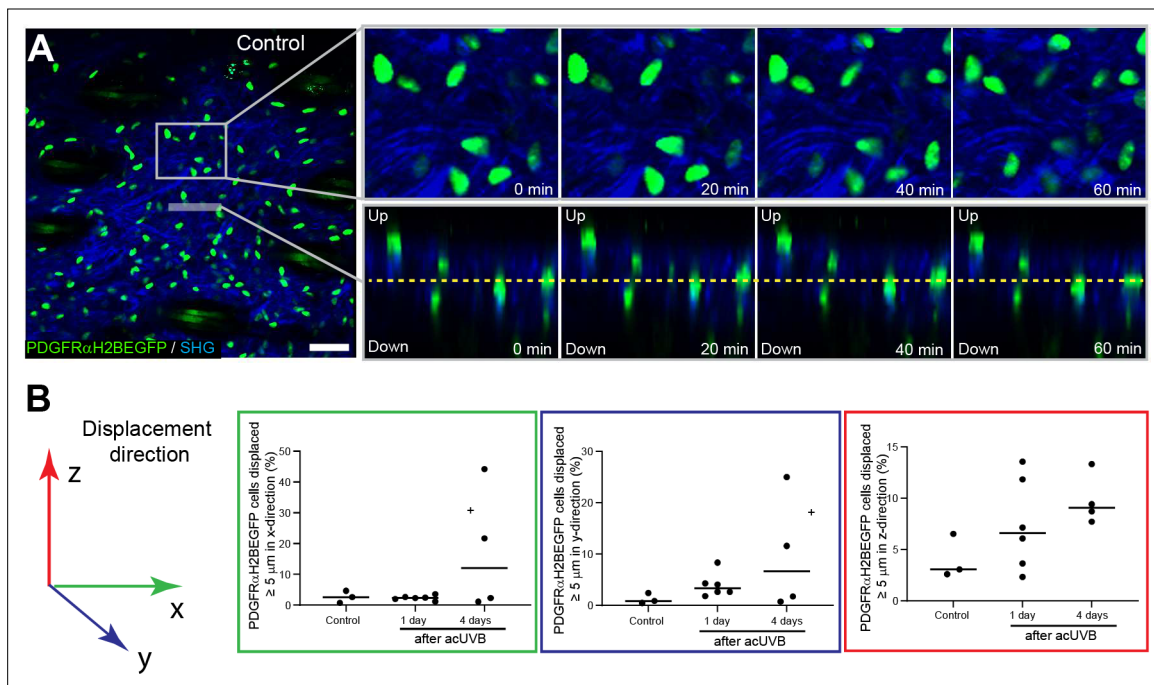

**Figure 4—figure supplement 1.** Live imaging of control skin and fibroblast displacement direction. **(A)** Representative time-lapse images with selected closeups of adult PDGFR $\alpha$ H2BEGFP (green) dermis non-irradiated (control) with collagen shown as second harmonic generation (SHG) in blue at indicated imaging time points. Line indicates orthogonal closeup to follow vertical cell displacement, and box shows fibroblast movement in the horizontal plane (relates to **Figure 4—video 1**). Note that in control skin the cell displacement is minimal. Scale bar, 50  $\mu\text{m}$ . **(B)** Percentage of cells with a displacement of  $\geq 5 \mu\text{m}$  in x- (green box), y- (blue box), and z-direction (red box) in control and acute UVB (acUVB)-exposed back skin after 1 and 4 days. Source data of quantifications are summarised in **Figure 4—figure supplement 1—source data 1**.



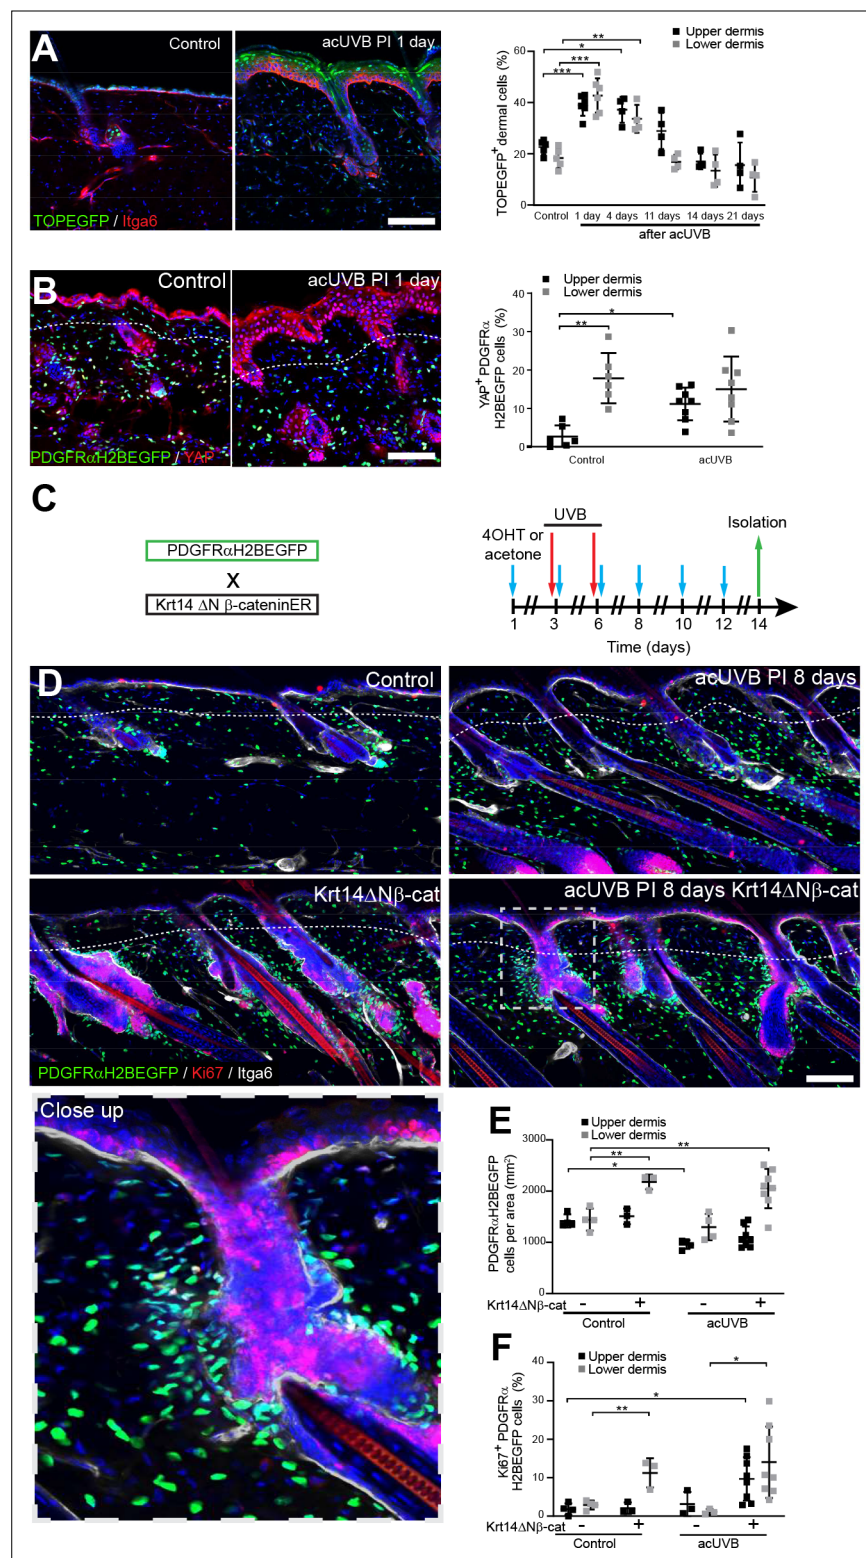

**Figure 5.** Induction of fibroblast proliferation is not sufficient to restore dermal homeostasis after ultraviolet radiation (UVR) exposure. **(A)** Representative Wnt signalling reporter (TOPEGFP) sections of control and treated skin stained for Itga6 (red). H2BEGFP (green) is expressed under the control of multiple Lef1/TCF binding sites reporting active Wnt/β-catenin signalling (Ferrer-Vaquer et al., 2010). Quantification of TOPEGFP-positive dermal cells in control and UVR-treated skin is shown. Note that Wnt/β-catenin signalling is increased in the epidermis as well as in the dermis. **(B)** Representative PDGFRαH2BEGFP back skin sections (green) stained for YAP (red) 1 day

Figure 5 continued on next page

*Figure 5 continued*

after acute UVB (acUVB) exposure. Quantification of PDGFR $\alpha$ H2BEGFP-positive cells with nuclear YAP in the upper and lower dermis is shown. Nuclear YAP is increased in the papillary dermis and IFE after acUVB exposure. **(C)** Experimental strategy for increasing fibroblast proliferation during acUVB damage tissue repair by stabilising epidermal  $\beta$ -catenin (Krt14 $\Delta$ N $\beta$ -cat transgenic). **(D)** Representative PDGFR $\alpha$ H2BEGFP back skin sections (green) of indicated transgenics stained for Ki67 (red) 8 days post-UVR. Dashed box indicates closeup area shown in the lower panel. **(E, F)** Quantification of dermal fibroblast density (PDGFR $\alpha$ H2BEGFP+) **(E)** and proliferation (Ki67 + PDGFR $\alpha$ H2BEGFP cells) **(F)** in the indicated treatment conditions. Nuclei were labelled with DAPI (blue), and dashed white line delineates upper and lower dermis. Scale bars, 50  $\mu$ m. Data are mean  $\pm$  SD. \* $p < 0.05$ , \*\* $p < 0.01$ , \*\*\* $p < 0.001$ . Source data of quantifications shown are summarised in **Figure 5—source data 1**.

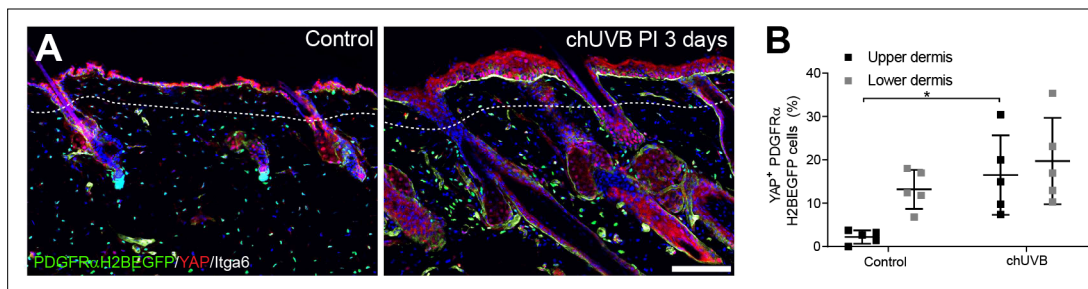

**Figure 5—figure supplement 1.** YAP localisation in chronic UVB (chUVB)-treated skin. (**A**, **B**) Immunofluorescence staining of control and chUVB-exposed PDGFRαH2BEGFP skin (green) for YAP (red) (**A**) and quantification of fibroblast with nuclear YAP in the upper and lower dermis (**B**). Nuclei were labelled with DAPI (blue), and dashed white line delineates upper and lower dermis. Scale bar, 50  $\mu$ m. Data are mean  $\pm$  SD. \* $p < 0.05$ . Source data of quantification are summarised in **Figure 5—figure supplement 1—source data 1**.



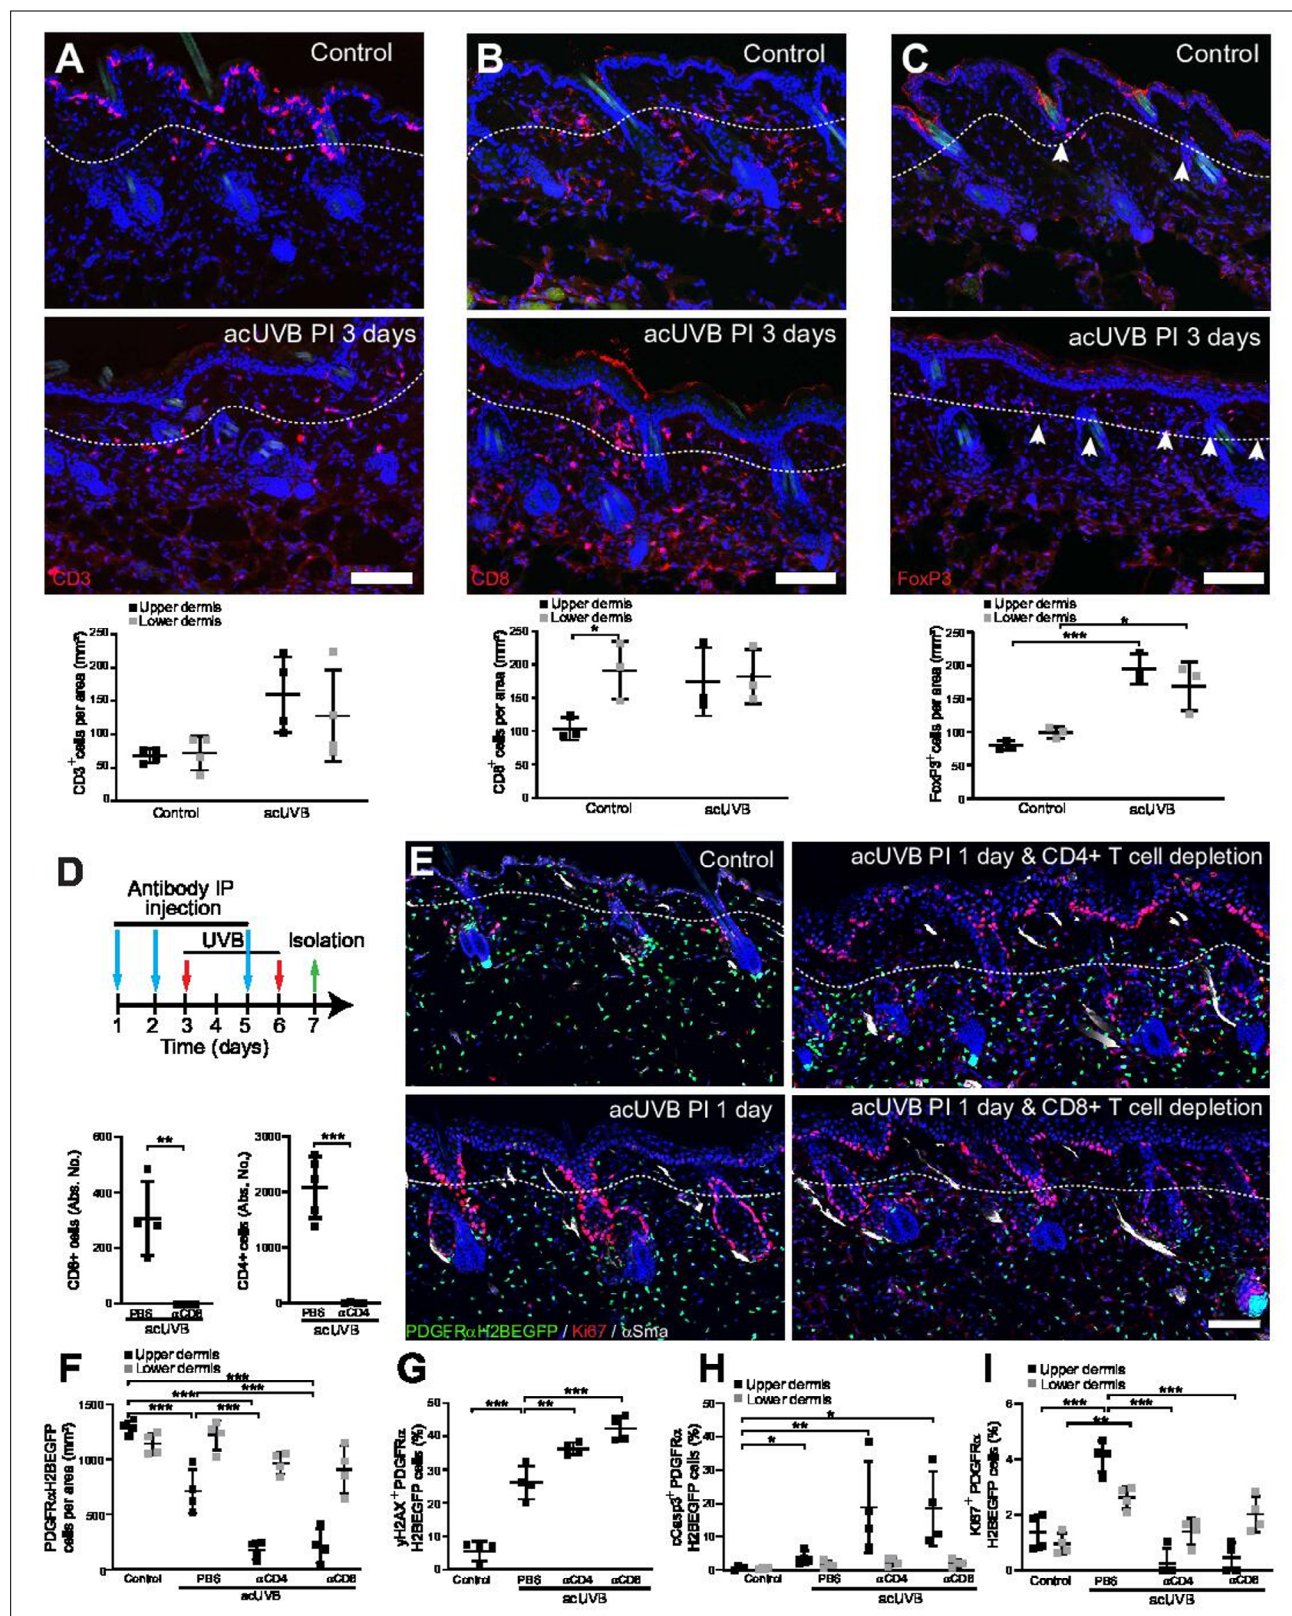

**Figure 6.** Cutaneous T cells redistribute in response to acute UVB (acUVB) exposure and influence dermal fibroblast survival. (A–C) Immunostaining of CD3 (CD3+ T cells) (A), CD8 (cytotoxic T cells) (B), and FoxP3+ (Tregs) (C), in red. Note the pronounced depletion of CD3+ T cells in the epidermis and redistribution of activated Tregs (white arrow heads) and cytotoxic T cells in the interfollicular dermis 3 days after acute ultraviolet radiation (acUVR). (D–I) CD4- and CD8-positive cell depletion increased fibroblast loss in the upper dermis after acUVB. (D) Experimental strategy for antibody-

Figure 6 continued on next page



*Figure 6 continued*

based immune cell depletion during acUVB (blue arrow, antibody injection; red arrow, UVB; green arrow, skin isolation) (top panel). Antibody depletion was assessed by FACS analysis of cutaneous CD4- and CD8-positive cells. Absolute number quantifications are for 6 cm<sup>2</sup> (bottom panels). **(E)** Representative immunostaining of PDGFR $\alpha$ H2BEGFP back skin (green) for Ki67 (red) and  $\alpha$ Sma (white). **(F–I)** Quantification of dermal fibroblast density (PDGFR $\alpha$ H2BEGFP+) **(F)**, DNA damage ( $\gamma$ H2AX + PDGFR $\alpha$ H2BEGFP cells) **(G)**, apoptosis (cCasp3 + PDGFR $\alpha$ H2BEGFP cells) **(H)**, and proliferation (Ki67+ PDGFR $\alpha$ H2BEGFP cells) **(I)** after acUVB and indicated treatment conditions. Nuclei were labelled with DAPI (blue), and dashed white line delineates upper and lower dermis. Scale bar, 50  $\mu$ m. IP, intraperitoneal injection. Data are mean  $\pm$  SD. \* $p$ <0.05, \*\* $p$ <0.01, \*\*\* $p$ <0.001. Source data of quantifications are summarised in **Figure 6—source data 1**.

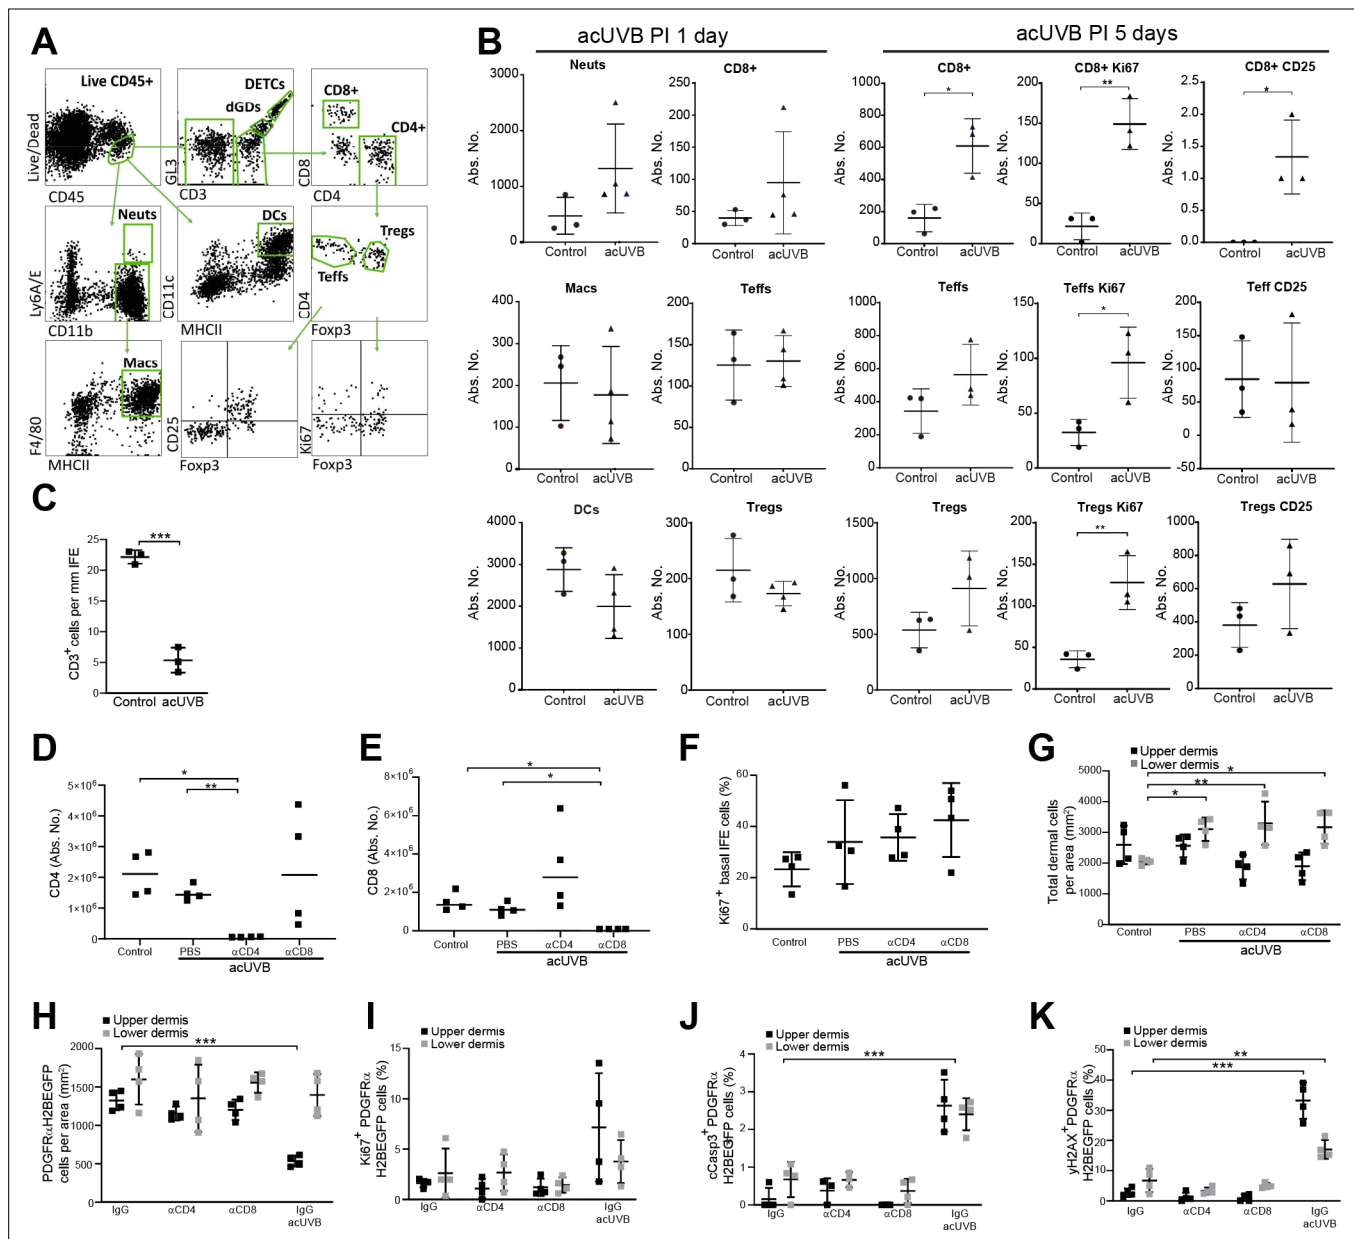

**Figure 6—figure supplement 1.** Immune cell infiltration after acute UVB (acUVB) exposure and during tissue repair. **(A)** FACS gating strategy for identifying innate and adaptive immune cell populations. After exclusion of doublets and dead cells, all hematopoietic cells were pre-gated as CD45+. Next lymphoid cells were gated as  $\gamma\delta$ -TCR+ CD3+ dermal  $\gamma\delta$  T cells (dGD),  $\gamma\delta$ -TCRhiCD3hi dendritic epidermal T cells (DETCs), CD3+ CD8+ T cells (CD8), CD3+ CD4+ Foxp3– T effector cells (Teff), and CD3+ CD4+ Foxp3+ regulatory T cells (Treg). Myeloid cells were all pre-gated as  $\gamma\delta$ -TCR–CD3– double negative and then gated as CD11c + MHC-Class II + dendritic cells (DCs), Ly-6A/E + CD11b + neutrophils (Neuts), and Ly-6A/E–CD11b + ClassII + F4/80+ macrophages (Macs). **(B)** FACS analysis of indicated immune cells 1 and 5 days post-acUVB. Beside abundance, proliferation (Ki67) and activation (CD25) of indicated T cell populations are shown. Absolute number quantifications of cutaneous T cells are for 6 cm<sup>2</sup>. **(C)** Quantification of CD3+ cells in the epidermis visualised in **Figure 6A**. **(D, E)** FACS analysis of lymph node tissue for CD4+ (**D**) and CD8+ cells (**E**) at indicated treatment conditions; absolute numbers were quantified. Note that the respective blocking antibody efficiently depleted CD8+ and CD4+ cells in the circulation and led to an increase of other T cell subsets after acUVB. **(F, G)** Quantification of basal IFE keratinocyte proliferation (Ki67+) (**F**) and total dermal density (DAPI+) (**G**) 24 hr after acUVB and indicated treatment condition. **(H–K)** Quantification of dermal fibroblast density (PDGFR $\alpha$ H2BEGFP+) (**H**), proliferation (Ki67+ PDGFR $\alpha$ H2BEGFP+) (**I**), apoptosis (cCasp3+ PDGFR $\alpha$ H2BEGFP+) (**J**), and DNA damage ( $\gamma$ H2AX+ PDGFR $\alpha$ H2BEGFP+) (**K**) after acUVB and indicated treatment condition. Data are mean  $\pm$  SD. \* $p$ <0.05, \*\* $p$ <0.01, \*\*\* $p$ <0.001. Source data of quantifications shown are summarised in **Figure 6—figure supplement 1—source data 1**.

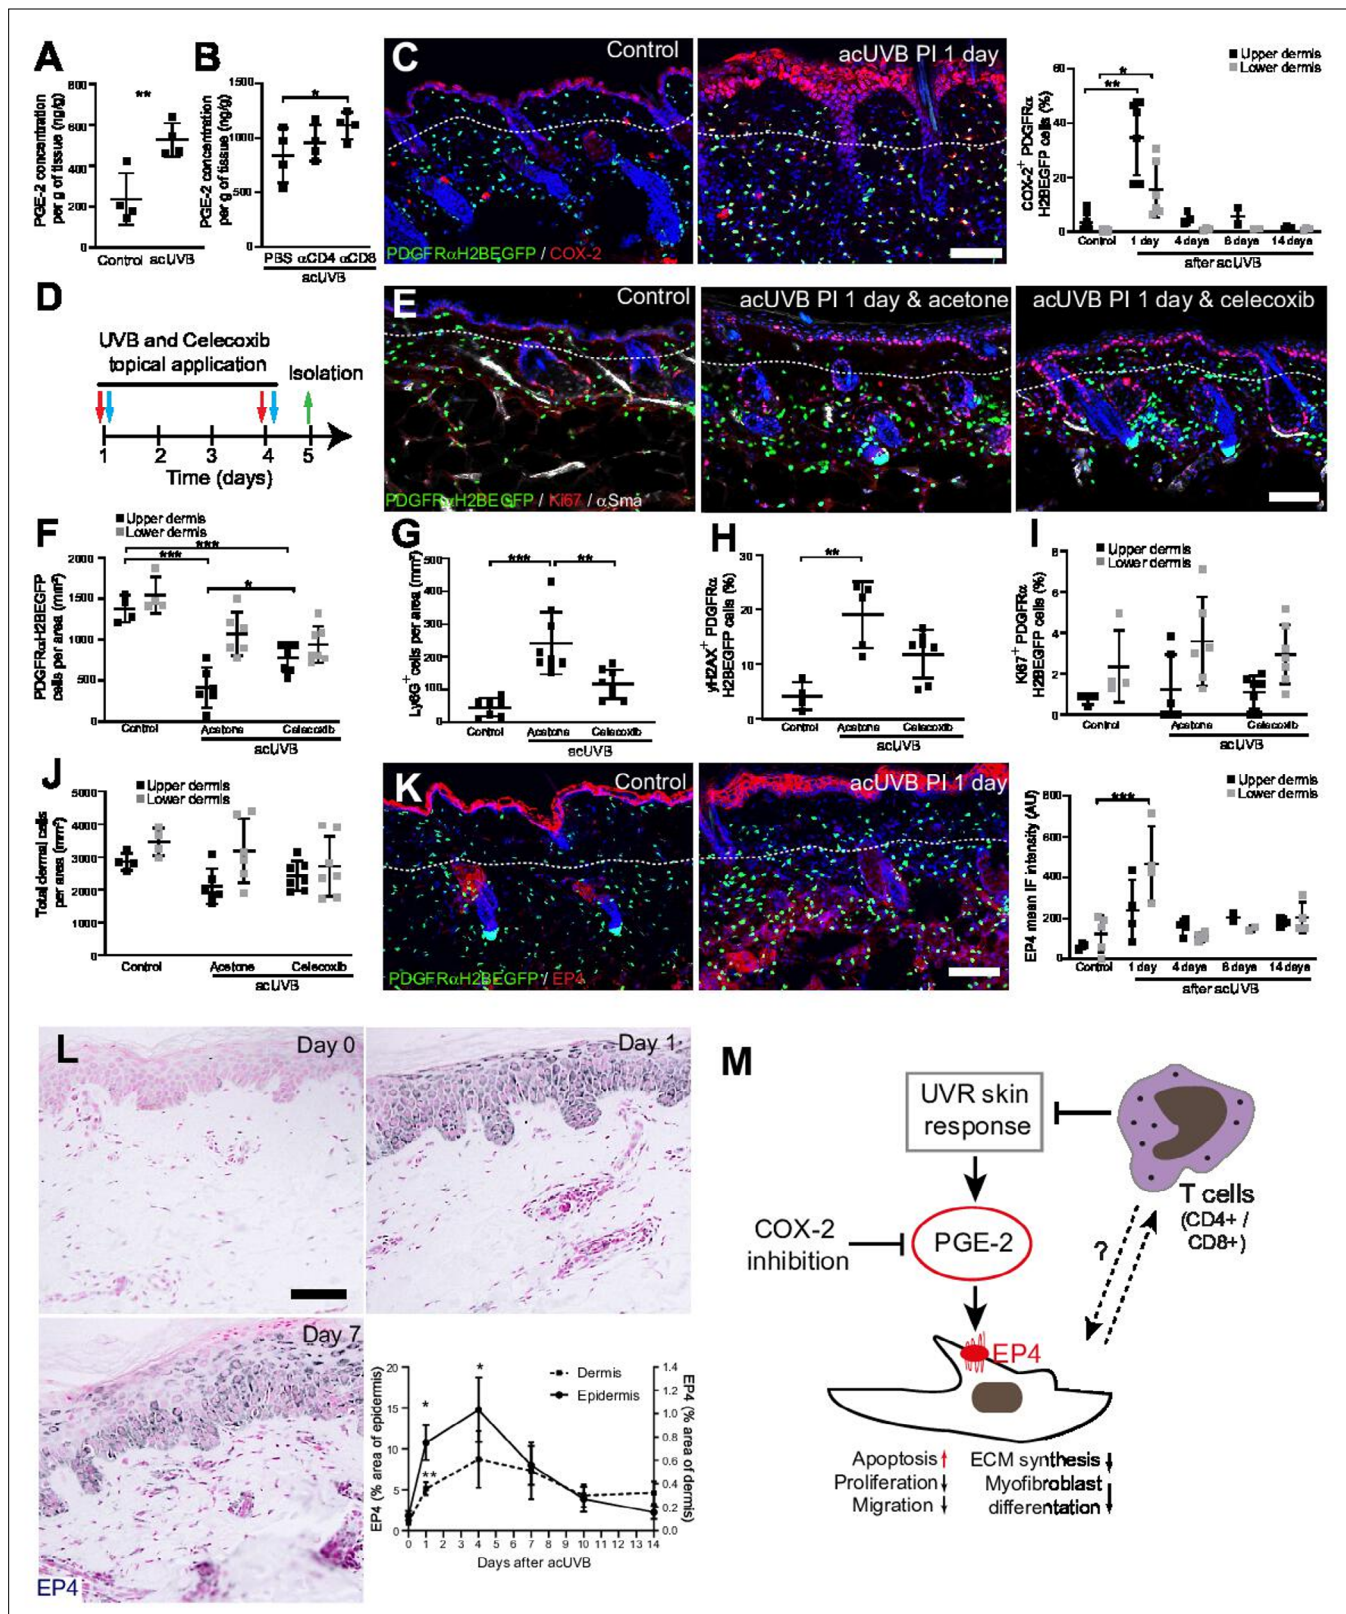

**Figure 7.** Inhibition of ultraviolet radiation (UVR)-induced inflammation increases fibroblast survival in the skin. (A, B) Prostaglandin E2 (PGE-2) skin concentration 24 hr after acute UVB (acUVB) exposure (A) and in combination with CD4+ and CD8+ cell depletion (B). Note that antibody depletion of CD4+ and CD8+ cells further increases the PGE-2 concentration in acUVB-treated skin. (C) Representative PDGFR $\alpha$ H2BEGFP sections (green) stained for COX-2 (red) of control and treated skin and quantification of double-positive cells at the indicated time points post-acUVR. Note that the

Figure 7 continued on next page

*Figure 7 continued*

epidermis and dermis show pronounced increase in COX-2 expression 24 hr after acUVB exposure. **(D–J)** COX-2 inhibition decreased fibroblast loss. **(D)** Experimental design for topical treatment with celecoxib (COX-2 inhibition) immediately after acUVB exposure. **(E)** Representative immunostaining of PDGFR $\alpha$ H2BEGFP back skin (green) for Ki67 (red) and  $\alpha$ Sma (white) under the indicated treatment conditions. **(F–J)** Quantification of dermal fibroblast density (PDGFR $\alpha$ H2BEGFP+) **(F)**, neutrophil infiltration (Ly6G+) **(G)**, DNA damage (yH2AX+ PDGFR $\alpha$ H2BEGFP cells) **(H)**, fibroblast proliferation (Ki67+ PDGFR $\alpha$ H2BEGFP) **(I)**, and total dermal cells (DAPI+) **(J)** under the indicated experimental conditions. **(K)** Representative PDGFR $\alpha$ H2BEGFP sections (green) stained for EP4 (red) and quantification of the EP4 mean fluorescence intensity at the indicated time points post-UVR. **(L)** Immunostaining of human skin for EP4 receptor and quantification of EP4 in the epidermal and dermal areas per field of view at the indicated time points after acUVB exposure (n = 13 biological replicates). **(M)** Model of PGE-2-EP4 signalling in dermal fibroblasts after UVR exposure showing the influence on tissue damage response and survival in concert with T cells. Data are mean  $\pm$  SD except **(L)**, is  $\pm$  SEM. \*p<0.05, \*\*p<0.01, \*\*\*p<0.001. Nuclei were labelled with DAPI (blue), and dashed white line delineates upper and lower dermis. Scale bars, 50  $\mu$ m. Source data of quantifications are summarised in **Figure 7—source data 1**.
