# Supplementary material for: Role of distinct fibroblast lineages and immune cells in dermal repair following UV radiation-induced tissue damage
Source: eLife journal article supplement (doi:10.7554/elife.71052), 2021-12-23
Supplement: supp [file elife-71052-supp-v1.zip]

Archive with 25 entries (25 files):
- elife_poa_e71052_Figure_1_figure_supplement_1.pdf
- elife_poa_e71052_Figure_1_figure_supplement_2.pdf
- elife_poa_e71052_Figure_2_figure_supplement_1.pdf
- elife_poa_e71052_Figure_3_figure_supplement_1.pdf
- elife_poa_e71052_Figure_4_figure_supplement_1.pdf
- elife_poa_e71052_Figure_5_figure_supplement_1.pdf
- elife_poa_e71052_Figure_6_figure_supplement_1.pdf
- elife_poa_e71052_Supplementary_file_1.docx
- elife_poa_e71052_Figure_4_video_1.avi
- elife_poa_e71052_Figure_4_video_2.avi
- elife_poa_e71052_Figure_4_video_3.avi
- elife_poa_e71052_Transparent_Reporting_File.docx
- elife_poa_e71052_Figure_1_ffigure_supplement_1_source_data_1.xlsx
- elife_poa_e71052_Figure_1_source_data_1.xlsx
- elife_poa_e71052_Figure_1_figure_supplement_2_source_data_1.zip
- elife_poa_e71052_Figure_2_source_data_1.xlsx
- elife_poa_e71052_Figure_3_figure_supplement_1_source_data_1.xlsx
- elife_poa_e71052_Figure_3_source_data_1.xlsx
- elife_poa_e71052_Figure_4_figure_supplement_1_source_data_1.xlsx
- elife_poa_e71052_Figure_4_source_data_1.xlsx
- elife_poa_e71052_Figure_5_figure_supplement_1_source_data_1.xlsx
- elife_poa_e71052_Figure_5_source_data_1.xlsx
- elife_poa_e71052_Figure_6_source_data_1.xlsx
- elife_poa_e71052_Figure_6_figure_supplement_1_source_data_1.xlsx
- elife_poa_e71052_Figure_7_source_data_1.xlsx
