# Supplementary material for: Role of distinct fibroblast lineages and immune cells in dermal repair following UV radiation-induced tissue damage
Source: eLife journal article supplement (doi:10.7554/elife.71052), 2021-12-23
Supplement: supp [file elife-71052-supp-v1.zip › elife_poa_e71052_Figure_1_ffigure_supplement_1_source_data_1.xlsx]

## Sheet: Figure S1B
	Dermal thickness quantification after acUVB exposure (um)
	Control	P1day	PI4days	PI8 days
Mouse 1	156.373	270.98	214.418	199.748
Mouse 2	156.887	309.946	221.379	199.096
Mouse 3	129.84	223.904	200.014	207.266
Mouse 4	147.154	278.551	180.932	198.75
Mouse 5	174.947	186.681	195.322	203.224
Mouse 6	175.296	287.163		190.137
Mouse 7	231.244	253.274
Mouse 8	213.463	296.212
Mouse 9	195.469	311.837
Mouse 10	200.391	366.49
Mouse 11	183.573	336.253
Mouse 12	220.748
Mouse 13	172.223
Mouse 14	181.627
		Dermal thickness in pixel					Dermal thickness in um
in pixel	Control	PI1day	PI 4day	PI 8days	in um	Control	PI1day	PI 4day	PI 8days
1pixel	252.215	437.065	345.836	322.174	0.62	156.373	270.98	214.418	199.748
0,62um	253.043	499.913	357.062	321.122		156.887	309.946	221.379	199.096
	209.419	361.136	322.604	334.3		129.84	223.904	200.014	207.266
	237.345	449.276	291.826	320.564		147.154	278.551	180.932	198.75
	282.172	301.098	315.036	327.781		174.947	186.681	195.322	203.224
	282.736	463.166		306.673		175.296	287.163		190.137
	372.975	408.507				231.244	253.274
	344.295	477.761				213.463	296.212
	315.273	502.963				195.469	311.837
	323.211	591.113				200.391	366.49
	296.086	542.344				183.573	336.253
	356.045					220.748
	277.779					172.223
	292.947					181.627
	Summanry dermal thickness in um
	Control	P1day	PI4days	PI8 days
Mouse 1	156.373	270.98	214.418	199.748
Mouse 2	156.887	309.946	221.379	199.096
Mouse 3	129.84	223.904	200.014	207.266
Mouse 4	147.154	278.551	180.932	198.75
Mouse 5	174.947	186.681	195.322	203.224
Mouse 6	175.296	287.163		190.137
Mouse 7	231.244	253.274
Mouse 8	213.463	296.212
Mouse 9	195.469	311.837
Mouse 10	200.391	366.49
Mouse 11	183.573	336.253
Mouse 12	220.748
Mouse 13	172.223
Mouse 14	181.627

## Sheet: Figure S1C
		FACS quantification of total immune cells (CD45+ live cells in %)
		Control				acUVB
	live CD45+	7.86	4.13	8.23	8.68	25	21.4	16.9
