# Supplementary material for: Role of distinct fibroblast lineages and immune cells in dermal repair following UV radiation-induced tissue damage
Source: eLife journal article supplement (doi:10.7554/elife.71052), 2021-12-23
Supplement: supp [file elife-71052-supp-v1.zip › elife_poa_e71052_Figure_1_source_data_1.xlsx]

## Sheet: Figure 1A
		Human skin Fb density (CD39+,VM+) per field of view after acute UVB exposure
		FB desnity data normalised to 0 day
		days
	patient	0	1	4	7	10	14
	S04	1	0.732484	0.178344	0.286624	0.94586	0.710191
	S05	1	0.513393	0.741071	1.20982	1.29018	1.75446
	S06	1	0.765432	0.621399	1.53909	1.15638	1.67078
	S07	1	1.05202	1.47977	2.31214	1.73988	0.965318
	S08	1	0.850932	1.25466	1.70186	1.36025	1.73292
	S09	1	0.901709	1.32051	1.33761	1.60256	1.16239
0h	S04					24h	S04					96h	S04					168h	S04					240h	S04						336hh	S04
	Image number	CD39+Vimentin+	CD39+	VIM+			Image number	CD39+Vimentin+	CD39+	VIM+			Image number	CD39+Vimentin+	CD39+	VIM+			Image number	CD39+Vimentin+	CD39+	VIM+			Image number	CD39+Vimentin+	CD39+	VIM+				Image number	CD39+Vimentin+	CD39+	VIM+
	S04 0h S1_1	40	9	12			S04 24h S1_1	27	10	3			S04 96h S1_1	3	6	68			S04 168h S1_1	6	14	28			S04 240h S1_1	50	13	19				S04 336h S1_1	22	16	39
	S04 0h S1_2	37	16	6			S04 24h S1_2	25	5	19			S04 96h S1_2	1	5	47			S04 168h S1_2	9	24	48			S04 240h S1_2	36	22	27				S04 336h S1_2	31	14	23
	S04 0h S1_3	42	10	14			S04 24h S1_3	40	15	16			S04 96h S1_3	4	4	20			S04 168h S1_3	10	10	30			S04 240h S1_3	29	23	61				S04 336h S1_3	17	21	32
	S04 0h S2_1	37	13	8			S04 24h S2_1	20	6	7			S04 96h S2_1	2	15	39			S04 168h S2_1	21	30	22			S04 240h S2_1	22	19	47				S04 336h S2_1	30	4	31
	S04 0h S2_2	30	13	22			S04 24h S2_2	25	18	12			S04 96h S2_2	5	9	39			S04 168h S2_2	10	11	20			S04 240h S2_2	37	9	16				S04 336h S2_2	24	9	32
	S04 0h S2_3	46	15	3			S04 24h S2_3	17	2	14			S04 96h S2_3	9	16	22			S04 168h S2_3	7	10	23			S04 240h S2_3	26	15	35				S04 336h S2_3	23	17	35
	S04 0h S3_1	21	24	54			S04 24h S3_1	33	10	10			S04 96h S3_1	9	18	36			S04 168h S3_1	17	16	54			S04 240h S3_1	26	18	31				S04 336h S3_1	28	24	37
	S04 0h S3_2	35	24	25			S04 24h S3_2	19	4	25			S04 96h S3_2	11	6	29			S04 168h S3_2	4	14	8			S04 240h S3_2	30	31	41				S04 336h S3_3	14	13	39
	S04 0h S3_3	26	8	17			S04 24h S3_3	24	16	32			S04 96h S3_3	12	17	25			S04 168h S3_3	6	8	32			S04 240h S3_3	41	15	40				S04 336h S3_4	34	23	43
		34.8889	14.6667	17.8889				25.5556	9.55556	15.3333				6.22222	10.6667	36.1111				10	15.2222	29.4444				33	18.3333	35.2222					24.7778	15.6667	34.5556
							%	73.2484					%	17.8344					%	28.6624				%		94.586					%		71.0191
0h	S05					24h	S05					96h	S05					168h	S05					240h	S05						336h	S05
	Image number	CD39+Vimentin+	CD39+	VIM+			Image number	CD39+Vimentin+	CD39+	VIM+			Image number	CD39+Vimentin+	CD39+	VIM+			Image number	CD39+Vimentin+	CD39+	VIM+			Image number	CD39+Vimentin+	CD39+	VIM+				Image number	CD39+Vimentin+	CD39+VIM-	VIM+
	S05 0h S1_1	23	2	39			S05 24h S1_1	18	4	14			S05 96h S1_1	15	1	14			S05 168h S1_1	21	5	10			S05 240h S1_1	31	15	9				S05 336h S1_1	53	11	9
	S05 0h S1_2	26	0	8			S05 24h S1_2	7	6	2			S05 96h S1_2	17	13	37			S05 168h S1_2	41	9	17			S05 240h S1_2	23	9	36				S05 336h S1_2	46	0	1
	S05 0h S1_4	22	5	20			S05 24h S1_3	21	10	25			S05 96h S1_3	21	20	46			S05 168h S1_3	27	3	9			S05 240h S1_3	43	32	18				S05 336h S1_3	56	27	56
	S05 0h S2_1	15	0	6			S05 24h S2_1	11	5	15			S05 96h S2_1	12	16	42			S05 168h S2_1	33	3	24			S05 240h S2_1	31	12	11				S05 336h S2_1	50	3	12
	S05 0h S2_2	17	2	19			S05 24h S2_2	6	4	25			S05 96h S2_2	10	10	50			S05 168h S2_2	39	10	26			S05 240h S2_2	27	30	5				S05 336h S2_2	46	0	11
	S05 0h S2_3	36	3	15			S05 24h S2_3	10	3	7			S05 96h S2_3	12	9	28			S05 168h S2_3	26	13	18			S05 240h S2_3	38	17	18				S05 336h S2_3	34	14	29
	S05 0h S3_1	23	0	12			S05 24h S3_1	24	9	21			S05 96h S3_1	19	22	25			S05 168h S3_1	38	15	28			S05 240h S3_1	38	8	14				S05 336h S3_1	39	19	9
	S05 0h S3_2	21	6	19			S05 24h S3_2	9	10	16			S05 96h S3_2	10	6	28			S05 168h S3_2	19	13	38			S05 240h S3_2	27	6	23				S05 336h S3_2	28	8	15
	S05 0h S3_3	41	5	9			S05 24h S3_3	9	4	24			S05 96h S3_3	50	6	7			S05 168h S3_3	27	18	23			S05 240h S3_3	31	17	17				S05 336h S3_3	41	25	68
		24.8889	2.55556	16.3333				12.7778	6.11111	16.5556				18.4444	11.4444	30.7778				30.1111	9.88889	21.4444				32.1111	16.2222	16.7778					43.6667	11.8889	23.3333
							%	51.3393					%	74.1071				%		120.982				%		129.018					%		175.446
0h	S06					24h	S06					96h	S06					168h	S06					240h	S06						336h	S06
	Image number	CD39+Vimentin+	CD39+VIM-	VIM+			Image number	CD39+Vimentin+	CD39+VIM-	VIM+			Image number	CD39+Vimentin+	CD39+VIM-	VIM+			Image number	CD39+Vimentin+	CD39+VIM-	VIM+			Image number	CD39+Vimentin+	CD39+VIM-	VIM+				Image number	CD39+Vimentin+	CD39+VIM-	VIM+
	S06 0h S1_1	26	10	32			S06 24h S1_1	13	12	20			S06 96h S1_1	6	15	42			S06 168h S1_1	40	20	55			S06 240h S1_1	17	6	13				S06 336h S1_1	48	18	10
	S06 0h S1_2	11	10	19			S06 24h S1_2	24	1	15			S06 96h S1_2	17	15	27			S06 168h S1_2	40	8	93			S06 240h S1_2	38	26	16				S06 336h S1_2	47	22	6
	S06 0h S1_4	19	10	28			S06 24h S1_3	26	12	12			S06 96h S1_3	31	13	49			S06 168h S1_3	23	19	82			S06 240h S1_4	48	11	8				S06 336h S1_3	55	11	6
	S06 0h S2_2	22	6	24			S06 24h S2_1	21	9	31			S06 96h S1_4	7	8	50			S06 168h S2_1	82	8	40			S06 240h S2_1	27	8	14				S06 336h S2_1	42	14	15
	S06 0h S2_3	20	16	13			S06 24h S2_2	26	11	22			S06 96h S1_5	5	15	57			S06 168h S2_2	20	13	39			S06 240h S2_2	24	25	13				S06 336h S2_2	57	17	5
	S06 0h S2_4	36	23	15			S06 24h S2_3	26	9	27			S06 96h S1_6	14	7	53			S06 168h S2_3	27	12	60			S06 240h S2_3	33	14	12				S06 336h S2_3	58	13	12
	S06 0h S3_1	24	6	3			S06 24h S3_1	10	6	17			S06 96h S3_1	15	5	19			S06 168h S3_1	70	17	50			S06 240h S3_1	22	5	14				S06 336h S3_2	26	21	24
	S06 0h S3_2	27	9	13			S06 24h S3_2	20	4	18			S06 96h S3_2	31	7	31			S06 168h S3_2	32	22	22			S06 240h S3_3	51	16	29				S06 336h S3_4	44	19	9
	S06 0h S3_3	58	3	8			S06 24h S3_4	20	9	13			S06 96h S3_3	25	12	15			S06 168h S3_3	40	16	35			S06 240h S3_4	21	15	12				S06 336h S3_3	29	25	12
		27	10.3333	17.2222				20.6667	8.11111	19.4444				16.7778	10.7778	38.1111				41.5556	15	52.8889				31.2222	14	14.5556					45.1111	17.7778	11
							%	76.5432					%	62.1399					%	153.909					%	115.638						%	167.078
0h	S08					24h	S08					96h	S08					168h	S08					240h	S08						336h	S08
	Image number	CD39+Vimentin+	CD39+VIM-	VIM+			Image number	CD39+Vimentin+	CD39+VIM-	VIM+			Image number	CD39+Vimentin+	CD39+VIM-	VIM+			Image number	CD39+Vimentin+	CD39+VIM-	VIM+			Image number	CD39+Vimentin+	CD39+VIM-	VIM+				Image number	CD39+Vimentin+	CD39+VIM-	VIM+
	S08 0h S1_1	24	5	31			S08 24h S1_1	27	7	25			S08 96h S1_1	42	2	59			S08 168h S1_1	34	10	57			S08 240h S1_1	34	9	42				S08 336h S1_1	30	3	39
	S08 0h S1_2	16	10	15			S08 24h S1_2	16	5	30			S08 96h S1_2	14	20	110			S08 168h S1_2	33	19	52			S08 240h S1_2	19	12	47				S08 336h S1_2	15	14	44
	S08 0h S1_3	13	15	26			S08 24h S1_3	20	4	21			S08 96h S1_3	19	15	46			S08 168h S1_3	37	16	73			S08 240h S1_3	40	6	59				S08 336h S1_3	22	5	22
	S08 0h S2_1	12	5	15			S08 24h S2_1	13	10	36			S08 96h S2_1	24	8	32			S08 168h S2_1	28	13	66			S08 240h S2_1	29	8	42				S08 336h S2_1	24	14	47
	S08 0h S2_2	17	13	20			S08 24h S2_2	15	8	42			S08 96h S2_3	27	13	139			S08 168h S2_2	29	7	64			S08 240h S2_2	13	9	53				S08 336h S2_2	20	5	42
	S08 0h S2_3	14	11	16			S08 24h S2_3	16	7	18			S08 96h S2_4	32	17	131			S08 168h S2_3	27	11	87			S08 240h S2_3	24	9	58				S08 336h S2_3	19	7	43
	S08 0h S3_1	17	8	13			S08 24h S3_1	14	8	25			S08 96h S3_1	6	1	22			S08 168h S3_1	31	15	81			S08 240h S3_1	21	3	35				S08 336h S3_1	58	17	6
	S08 0h S3_2	27	11	15			S08 24h S3_2	12	5	29			S08 96h S3_2	25	9	51			S08 168h S3_2	26	6	28			S08 240h S3_2	15	3	66				S08 336h S3_2	55	10	32
	S08 0h S3_3	21	16	23			S08 24h S3_3	4	15	39			S0896h S3_3	13	14	143			S08 168h S3_3	29	18	72			S08 240h S3_3	24	4	52				S08 336h S3_3	36	20	24
		17.8889	10.4444	19.3333				15.2222	7.66667	29.4444				22.4444						30.4444						24.3333							31
								85.0932						125.466						170.186						136.025							173.292
0h	S07					24h	S07					96h	S07					168h	S07					240h	S07						336h	S07
	Image number	CD39+Vimentin+	CD39+VIM-	VIM+			Image number	CD39+Vimentin+	CD39+VIM-	VIM+			Image number	CD39+Vimentin+	CD39+VIM-	VIM+			Image number	CD39+Vimentin+	CD39+VIM-	VIM+			Image number	CD39+Vimentin+	CD39+VIM-	VIM+				Image number	CD39+Vimentin+	CD39+VIM-	VIM+
	S07 0h S1_1	28	13	12			S07 24h S1_1	22	12	28			S07 96h S1_1	30	7	6			S07 168h S1_1	35	1	6			S07 240h S1_1	62	13	2				S07 336h S1_1	33	12	6
	S07 0h S1_2	33	8	2			S07 24h S1_2	14	3	51			S07 96h S1_2	38	3	1			S07 168h S1_2	55	13	9			S07 240h S1_2	23	9	1				S07 336h S1_2	43	12	3
	S07 0h S1_3	29	4	7			S07 24h S1_3	24	5	36			S07 96h S1_3	54	19	3			S07 168h S1_3	45	17	5			S07 240h S1_3	53	7	2				S07 336h S1_3	33	9	2
	S07 0h S2_1	11	4	9			S07 24h S2_1	19	6	23			S07 96h S2_1	30	5	7			S07 168h S2_1	58	16	14			S07 240h S2_1	19	8	28				S07 336h S2_1	13	16	51
	S07 0h S2_2	10	7	6			S07 24h S2_2	2	8	22			S07 96h S2_2	21	10	1			S07 168h S2_2	39	12	5			S07 240h S2_2	49	5	30				S07 336h S2_2	17	10	36
	S07 0h S2_3	14	4	8			S07 24h S2_3	14	8	25			S07 96h S2_3	12	1	7			S07 168h S2_3	47	18	7			S07 240h S2_3	37	22	24				S07 336h S2_3	10	6	43
	S07 0h S3_1	17	8	13			S07 24h S3_1	28	5	6			S07 96h S3_1	27	11	8			S07 168h S3_1	34	11	7			S07 240h S3_1	15	3	73				S07 336h S3_1	41	18	4
	S07 0h S3_2	8	4	18			S07 24h S3_2	48	18	13			S07 96h S3_2	29	9	3			S07 168h S3_2	40	13	2			S07 240h S3_2	30	9	21				S07 336h S3_2	37	11	2
	S07 0h S3_3	23	4	19			S07 24h S3_3	11	27	35			S07 96h S3_3	15	0	20			S07 168h S3_3	47	15	29			S07 240h S3_3	13	23	60				S07 336h S3_3	45	45	4
		19.2222	6.22222	10.4444				20.2222	10.2222	26.5556				28.4444						44.4444						33.4444							30.2222
								105.202						147.977						231.214						173.988							157.225
0h	S09					24h	S09					96h	S09					168h	S09					240h	S09						336h	S09
	Image number	CD39+Vimentin+	CD39+VIM-	VIM+			Image number	CD39+Vimentin+	CD39+VIM-	VIM+			Image number	CD39+Vimentin+	CD39+VIM-	VIM+			Image number	CD39+Vimentin+	CD39+VIM-	VIM+			Image number	CD39+Vimentin+	CD39+VIM-	VIM+				Image number	CD39+Vimentin+	CD39+VIM-	VIM+
	S09 0h S1_1	30	29	4			S09 24h S1_1	26	5	12			S09 96h S1_1	28	9	32			S09 168h S1_1	41	7	19			S09 240h S1_1	64	10	8				S09 336h S1_1	32	10	13
	S09 0h S1_2	21	14	12			S09 24h S1_2	34	6	15			S09 96h S1_2	17	5	44			S09 168h S1_2	34	9	19			S09 240h S1_2	45	5	13				S09 336h S1_2	31	15	17
	S09 0h S1_3	18	7	29			S09 24h S1_3	48	8	5			S09 96h S1_3	41	10	38			S09 168h S1_3	21	17	25			S09 240h S1_3	41	8	18				S09 336h S1_3	23	12	23
	S09 0h S2_1	28	11	9			S09 24h S2_1	25	21	23			S09 96h S2_1	48	11	4			S09 168h S2_1	25	16	6			S09 240h S2_1	39	5	12				S09 336h S2_1	4	6	51
	S09 0h S2_2	63	0	13			S09 24h S2_2	26	12	16			S09 96h S2_2	50	20	11			S09 168h S2_2	38	18	26			S09 240h S2_2	43	19	25				S09 336h S2_2	25	21	16
	S09 0h S2_3	11	25	4			S09 24h S2_3	38	16	13			S09 96h S2_3	36	0	16			S09 168h S2_3	49	23	31			S09 240h S2_3	51	5	5				S09 336h S2_3	16	10	38
	S09 0h S2_4	16	20	3			S09 24h S3_1	3	12	52			S09 96h S3_1	40	8	25			S09 168h S3_1	64	22	7			S09 240h S3_1	30	10	8				S09 336h S3_1	10	7	40
	S09 0h S3_1	39	21	9			S09 24h S3_2	3	11	68			S09 96h S3_2	17	14	54			S09 168h S3_2	25	25	41			S09 240h S3_2	32	7	24				S09 336h S3_2	15	14	45
	S09 0h S3_2	8	18	19			S09 24h S3_3	8	11	45			S09 96h S3_3	32	8	18			S09 168h S3_3	16	8	24			S09 240h S3_3	30	11	14				S09 336h S3_3	11	25	85
		26	16.1111	11.3333				23.4444	11.3333	27.6667				34.3333						34.7778						41.6667							18.5556
								90.1709						132.051						133.761						160.256							71.3675

## Sheet: Figure 1C
		Summary data of yH2X positive Fbs (%) after acUVB
		Upper dermis					Lower dermis
	Control	4.10959	6.62252	4.3956	4.41176	1.5625	6.08108	7.09459	5.52995	1.51771	8.07175
	1 day	21.0145	22.3077	20.1492	25		6.46976	10.6568	8.32197	15.3318
	4 days	16.7665	11.579	10.6977			9.72973	6.49351	7.08215
	8 days	7.5	8.01887				5.64186	5.64103
	14 days	0	3.33333	5.34591	1.58228		3.24675	7.8203	1.79795	0.994695
	PDGFR H2B cells		SD: 3, 100, filter 20
	DAPI		SD: 3, 200, filter 20
	yH2Ax		SD:4, 100, filter 40
acUVBControl									acUVB PI1d								acUVB PI4d									acUVB PI8d								acUVB PI14d
Sample		PDGFR+	yH2Ax+ PDGFR+	yH2Ax positive Fb%					Sample		PDGFR+	yH2Ax+ PDGFR+	yH2Ax positive Fb%				Sample		PDGFR+	yH2Ax+ PDGFR+	yH2Ax positive Fb%					Sample		PDGFR+	yH2Ax+ PDGFR+	yH2Ax positive Fb%				Sample		PDGFR+	yH2Ax+ PDGFR+	yH2Ax positive Fb%
acUVB Control PI1d GFP yH2Ay BSO 20x1	upper	73	3	4.10959					acute UV2x PDGF yH2AX WPHG162a BSO 20x1	upper	276	58	21.0145				acUVB PI4d BSO 1 GFP H2Ay 20x1	upper	104	23	22.1154					acUVB PI8d GFP yH2Ay BSO 20x1	upper	115	9	7.82609				acUVB PI14d GFP yH2Ay BSO 20x1	upper	91	0	0
	lower	148	9	6.08108						lower	1422	92	6.46976					lower	183	26	14.2077						lower	435	37	8.50575					lower	320	9	2.8125
																	acUVB PI4d BSO 1 GFP H2Ay 20x1	upper	63	5	7.93651					acUVB PI8d GFP yH2Ay BSO 20x1	upper	165	12	7.27273				acUVB PI14d GFP yH2Ay BSO 20x3	upper	89	0	0
									acute UV2x PDGF yH2AX WPHG162J BSO 20x1	upper	79	19	24.0506					lower	187	10	5.34759						lower	788	32	4.06091					lower	296	11	3.71622
acUVB Control PI1d 2 GFP yH2Ay BSO 20x1	upper	59	5	8.47458						lower	399	70	17.5439				Sum	upper	167	28	16.7665					Sum	upper	280	21	7.5				Sum	upper	180	0	0
	lower	161	12	7.45342					acute UV2x PDGF yH2AX WPHG162J BSO 20x2	upper	51	10	19.6078					lower	370	36	9.72973						lower	1223	69	5.64186					lower	616	20	3.24675
acUVB Control PI1d 2 GFP yH2Ay BSO 20x2	upper	92	5	5.43478						lower	408	16	3.92157				acUVB PI4d BSO 2 GFP H2Ay 20x3	upper	109	10	9.17431					acUVB PI8d GFP yH2Ay BSU 20x3	upper	117	10	8.54701				acUVB PI14d 2 GFP yH2Ay BSO 20x1	upper	87	5	5.74713
	lower	135	9	6.66667					Sum	upper	130	29	22.3077					lower	274	15	5.47445						lower	289	13	4.49827					lower	312	21	6.73077
Sum	upper	151	10	6.62252						lower	807	86	10.6568				acUVB PI4d BSO 2 GFP H2Ay 20x3	upper	81	12	14.8148					acUVB PI8d GFP yH2Ay BSU 20x2	upper	95	7	7.36842				acUVB PI14d 2 GFP yH2Ay BSO 20x3	upper	123	2	1.62602
	lower	296	21	7.09459					acute UV2x UVB 1d A BSU yH2Ax GFP 20x1	upper	61	4	6.55738					lower	111	10	9.00901						lower	296	20	6.75676					lower	289	26	8.99654
acUVB Control PI1d 3 GFP yH2Ay BSO 20x1	upper	67	3	4.47761						lower	277	6	2.16606				Sum	upper	190	22	11.5789					Sum	upper	212	17	8.01887				Sum	upper	210	7	3.33333
	lower	145	9	6.2069					acute UV2x UVB 1d A BSU yH2Ax GFP 20x2	upper	34	7	20.5882					lower	385	25	6.49351						lower	585	33	5.64103					lower	601	47	7.8203
acUVB Control PI1d 3 GFP yH2Ay BSO 20x2	upper	24	1	4.16667						lower	240	7	2.91667				acUVB PI4d BSO 3 GFP H2Ay 20x3	upper	120	15	12.5
	lower	72	3	4.16667					acute UV2x UVB 1d A BSU yH2Ax GFP 20x3	upper	39	16	41.0256					lower	220	12	5.45455
Sum	upper	91	4	4.3956						lower	216	48	22.2222				acUVB PI4d BSO 3 GFP H2Ay 20x1	upper	95	8	8.42105
	lower	217	12	5.52995					Sum	upper	134	27	20.1493					lower	133	13	9.77444													acUV P14
										lower	733	61	8.32196				Sum	upper	215	23	10.6977													Sample		PDGFR+	yH2Ax+ PDGFR+	yH2Ax positive Fb%
									acute UV2x UVB 1d J BSO yH2Ax GFP 20x1	upper	57	8	14.0351					lower	353	25	7.08215													acUVB PI14d A PI1d GFP yH2Ay Ki67 20x1	upper	82	8	9.7561
acUVBControl 4 GFP yH2Ay BSO 20x1	upper	113	8	7.07965						lower	285	11	3.85965																						lower	262	9	3.43511
	lower	256	7	2.73438																														acUVB PI14d A PI1d GFP yH2Ay Ki67 20x2	upper	51	2	3.92157
acUVBControl 4 GFP yH2Ay BSO 20x2	upper	91	1	1.0989																															lower	155	2	1.29032
	lower	337	2	0.593472					acUVB PI1d BSO 3 GFP H2Ay 20x1	upper	24	6	25																					acUVB PI14d A PI1d GFP yH2Ay Ki67 20x3	upper	82	3	3.65854
Sum	upper	204	9	4.41176						lower	260	31	11.9231																						lower	382	6	1.57068
	lower	593	9	1.51771						upper	20	5	25																					acUVB PI14d A PI1d GFP yH2Ay Ki67 20x4	upper	103	4	3.8835
acUVB PI1d 5 GFP yH2Ay BSO 20x1	upper	52	0	0						lower	177	36	20.339																						lower	369	4	1.08401
	lower	186	18	9.67742					Sum	upper	44	11	25																							318	17	5.34591
acUVB PI1d 5 GFP yH2Ay BSO 20x1	upper	76	2	2.63158						lower	437	67	15.3318																							1168	21	1.79795
	lower	260	18	6.92308						lower	408	16	3.92157
Sum	upper	128	2	1.5625					Sum	upper	614	103	16.7752
	lower	446	36	8.07175						lower	452	27	5.97345
									acute UV2x UVB 1d A BSU yH2Ax GFP 20x1	upper	61	4	6.55738
										lower	277	6	2.16606																					acUV P14
									acute UV2x UVB 1d A BSU yH2Ax GFP 20x2	upper	34	7	20.5882																					Sample		PDGFR+	yH2Ax+ PDGFR+	yH2Ax positive Fb%
										lower	240	7	2.91667																					acUVB PI14d B PI1d GFP yH2Ay Ki67 20x1	upper	137	2	1.45985
									acute UV2x UVB 1d A BSU yH2Ax GFP 20x3	upper	39	16	41.0256																						lower	423	6	1.41844
										lower	216	48	22.2222																					acUVB PI14d B PI1d GFP yH2Ay Ki67 20x2	upper	68	3	4.41176
									Sum	upper	134	27	20.1493																						lower	372	6	1.6129
										lower	733	61	8.32196																					acUVB PI14d B PI1d GFP yH2Ay Ki67 20x3	upper	61	0	0
									acute UV2x UVB 1d J BSO yH2Ax GFP 20x1	upper	57	8	14.0351																						lower	365	2	0.547945
										lower	285	11	3.85965																					acUVB PI14d B PI1d GFP yH2Ay Ki67 20x4	upper	50	0	0
																																			lower	348	1	0.287356
																																				316	5	1.58228
									acUVB PI1d BSO 3 GFP H2Ay 20x1	upper	24	6	25																							1508	15	0.994695
										lower	260	31	11.9231
										upper	20	5	25
										lower	177	36	20.339
									Sum	upper	44	11	25
										lower	437	67	15.3318

## Sheet: Figure 1D
	Summary of cCasp3+ Fbs (%) after acUVB
		Upper dermis							Lower dermis
	Control	0.255754	0.064935	0	0	0.391007	0.0619579	0.0619579	0.078989	0.176991	0.156067	0.175131	0.0560067	0.167906	0.167906
	1 day	2.95359	0.319489	1.18127	1.4433	6.61157	2.5	2.10526	0.463822	0.311526	0.464445	1.36908	0.481541	2.88335	1.47929
	4 days	2.46305	5.02793	0.647249					0.582524	1.49171	0.252525
	8 days	1.18624	0.196657						0.659921	0.241805
	14 days	0.388601	0.225734	0	1.01781				0.519481	0.150943	0.570613	0.545596
	Control							acUVB PI 1 day								acUVB PI 4 days									acUVB PI 8 days									acUVB PI 14 days
	NON IR #1 BSU	sum GFP	sum cCasp3+ fibroblasts	% cCasp3 Fbs													Sum BSU BSO Mouse 1									Sum BSU BSO Mouse 1
	papillary	1023	4	0.391007					Sum BSU BSO Mouse 1	GFP	cCasp	%cCasp					GFP	cCasp	%cCasp							GFP	cCasp	GFP area mm2	%cCasp
	reticular	3571	2	0.0560067					papillary	970	14	1.4433				pap	203	5	2.46305						pap	843	10	#REF!	1.18624					Sample		PDGFR+	cCasp3+ PDGFR+	cCasp3 positive Fb%
									reticular	1753	24	1.36908				ret	1030	6	0.582524						ret	2273	15	#REF!	0.659921					acUVB PI14d A PI1d GFP cCasp3 CD45 20x1	upper	78	0	0
																																			lower	157	1	0.636943
	NON IR #2 BSU	sum GFP	sum cCasp3+ fibroblasts	% cCasp3 Fbs																														acUVB PI14d A PI1d GFP cCasp3 CD45 20x2	upper	91	0	0
	papillary	1614	1	0.0619579						% of cCasp3+ GFP+ fibroblasts																									lower	271	3	1.10701
	reticular	4169	7	0.167906						WPH G16 2 a BSO-20x-1																Sum BSU BSO Mouse 2								acUVB PI14d A PI1d GFP yH2Ay Ki67 20x3	upper	68	0	0
										FB pap	FB ret						GFP	cCasp	%cCasp							GFP	cCasp	GFP area mm2	%cCasp						lower	273	0	0
										2.95359	0.463822					pap	358	18	5.02793						pap	1017	2	#REF!	0.196657
	NON IR #1 BSU	sum GFP	sum cCasp3+ fibroblasts	% cCasp3 Fbs												ret	1810	27	1.49171						ret	3722	9	#REF!	0.241805
	papillary	984	0	0.0619579					Average	2.95359	0.463822																									237	0	0
	reticular	2563	4	0.167906																																701	4	0.570613
										WPH G16 2 H BSU-20x-1
	NON IR #4 BSU	sum GFP	sum cCasp3+ fibroblasts	% cCasp3 Fbs						FB pap	FB ret						GFP	cCasp	%cCasp
	papillary	782	2	0.255754						0.319489	0.311526					pap	309	2	0.647249
	reticular	2532	2	0.078989												ret	1584	4	0.252525															acUV P14
									Average	0.319489	0.311526																							Sample		PDGFR+	cCasp3+ PDGFR+	cCasp3 positive Fb%
																																		acUVB PI14d B PI1d GFP cCasp3 CD45 20x1	upper	133	2	1.50376
																																			lower	353	1	0.283286
	NON IR #5 BSU	sum GFP	sum cCasp3+ fibroblasts	% cCasp3 Fbs																														acUVB PI14d B PI1d GFP cCasp3 CD45 20x2	upper	92	2	2.17391
	papillary	1540	1	0.064935						WPH G16 2 J BSO-20x-1																									lower	351	4	1.1396
	reticular	3390	6	0.176991						FB pap	FB ret																							acUVB PI14d B PI1d GFP cCasp3 CD45 20x3	upper	65	0	0
										1.06383	0.689655																								lower	354	1	0.282486
										1.2987	0.239234																							acUVB PI14d B PI1d GFP cCasp3 CD45 20x4	upper	103	0	0
	NON IR #6 BSU	sum GFP	sum cCasp3+ fibroblasts	% cCasp3 Fbs					Average	1.18127	0.464445																								lower	225	1	0.444444
	papillary	1021	0	0																																393	4	1.01781
	reticular	2563	4	0.156067																																1283	7	0.545596
	NON IR #7 BSU	sum GFP	sum cCasp3+ fibroblasts	% cCasp3 Fbs					IR #5 BSU	sum GFP	sum cCasp3+ fibroblasts	% cCasp3 Fbs
	papillary	1234	0	0					papillary	363	24	6.61157																						papillary dermis										reticular dermis
	reticular	2284	4	0.175131					reticular	1246	6	0.481541
																																		Maus #1	Area (µm2)	Nuclei	GFP	cCasp3+ in dermis	nuclei/area in mm²	GFP/area in mm2	cCasp3+ in dermis in GFP+ cells	% of cCasp3+ GFP+ fibroblasts		Maus #1	Area (µm2)	Nuclei	GFP	cCasp3+ in dermis	nuc/area
									IR #6 BSU	sum GFP	sum cCasp3+ fibroblasts	% cCasp3 Fbs																						1 BSO 20x-1	81396.6	247	99	1	3034.52	1216.27	0	0		1 BSO 20x-1	207833	616	298	6	2963.92
									papillary	240	6	2.5																						1 BSO 20x-2	269040	472	280	1	1754.38	1040.74	0	0		1 BSO 20x-2	734412	1213	811	21	1651.66
									reticular	867	25	2.88335																						1 BSU 20x-1	50681.8	160	68	4	3156.95	1341.7	1	1.47059		1 BSU 20x-1	148363	455	239	14	3066.8
																																		1 BSU 20x-2	100608	312	163	12	3101.15	1620.15	2	1.22699		1 BSU 20x-2	300264	847	452	12	2820.85
																																		1 BSU 20x-3	42144.1	129	54	3	3060.93	1281.32	0	0		1 BSU 20x-3	153660	494	238	11	3214.89
									IR #6 BSU	sum GFP	sum cCasp3+ fibroblasts	% cCasp3 Fbs																						1 BSU 20x-4	61701.7	174	108	5	2820.02	1750.36	0	0		1 BSU 20x-4	170125	495	272	9	2909.63
									papillary	285	6	2.10526																						2 BSO 20x-1	90081.8	312	168	3	3463.52	1864.97	1	0.595238		2 BSO 20x-1	252182	902	479	13	3576.79
									reticular	1014	15	1.47929																						2 BSO 20x-2	163262	407	191	10	2492.92	1169.9	1	0.52356		2 BSO 20x-2	531604	977	474	9	1837.84
																																		2 BSU 20x-1	151501	407	161	1	2686.46	1062.7	0	0		2 BSU 20x-1	537938	1436	691	4	2669.45
																																		2 BSU 20x-2	89523.2	248	105	1	2770.23	1172.88	0	0		2 BSU 20x-2	254441	701	333	5	2755.06
																																		2 BSU 20x-3	198032	574	261	2	2898.53	1317.97	0	0		2 BSU 20x-3	505382	1294	673	4	2560.44
																																		Summary										Summary
																																		Mouse 1	605573	1494	772	26			3	0.388601		Mouse 1	1.71466e+06	4120	2310	73
																																		Mouse 2	692399	1948	886	17			2	0.225734		Mouse 2	2.08155e+06	5310	2650	35
[truncated: 3 more columns]

## Sheet: Figure 1E
Summary of CD45 expression (MFI) after acUVB
	Upper dermis						Lower dermis
Control	91	97.5	100	135	56	95	51	33.5	66	64	20	41
1 day	201.5	462	413				128	385	380
4 days	328.5	469	202				183	153.5	94
8 days	219	237					87	87
14 days	233	224.5	161	121.75			142.5	185	151	106.25
	Control						acUVB PI 1day							acUVB PI 4 days							acUVB PI 8 days							acUVB PI 14 days
			Mean Intesnity CD45							Mean Intesnity CD45							Mean Intesnity CD45							Mean Intesnity CD45							Mean Intesnity CD45
	NR		upper	lower				2xUV 24h		upper	lower				2xUV 4d		upper	lower				2xUV 8d		upper	lower				2xUV 14d		upper	lower
	UV P4d 2 BSO 20x2		91	51											UV P4d 1 BSO 20x1		313	192				UV P8d 1 BSO 20x1		185	71				UV P14d 1 BSO 20x1		232	127
								WPJG162a BSO 20x2		171	120				UV P4d 1 BSO 20x3		344	174				UV P8d 1 BSO 20x3		253	103				UV P14d 1 BSO 20x2		234	158
	UV P4d BSO 20x2		97	30				WPJG162a BSO 20x3		232	136					Average	328.5	183					Average	219	87					Average	233	142.5
	UV P4d BSO 20x1		98	37					Average	201.5	128				UV P4d 2 BSO 20x1		562	184				UV P8d 1 BSO 20x2		301	108
		Average	97.5	33.5											UV P4d 2 BSU 20x1		376	123				UV P8d 1 BSO 20x3		173	66				UV P14d 2 BSO 20x1		271	230
								WPHG162H BSU 20x2		462	385					Average	469	153.5					Average	237	87				UV P14d 1 BSO 20x2		178	140
	UV P8d 1 BSU 20x1		100	66											UV P4d 3 BSU 20x1		130	55												Average	224.5	185
								WPHG162J BSO 20x1		413	380				UV P4d 3 BSO 20x3		274	133
	NR1 BSO 20x2		135	64												Average	202	94											UVR P14d A cCasp3 CD45 20x1BSO 20x1		31	18
																													UVR P14d A cCasp3 CD45 20x1BSO 20x2		283	311
	NR3 BSU 20x2		56	20																									UVR P14d A cCasp3 CD45 20x1BSO 20x3		169	124
																														Average	161	151
	NR2 BSO 20x3		95	41
																													UVR P14d B cCasp3 CD45 20x1BSO 20x1		17	11
																													UVR P14d B cCasp3 CD45 20x1BSO 20x2		149	128
																													UVR P14d B cCasp3 CD45 20x1BSO 20x3		186	166
																													UVR P14d B cCasp3 CD45 20x1BSO 20x4		135	120
																														Average	121.75	106.25

## Sheet: Figure 1F
	Summary of Fb density per area (mm2) after acUVB
		Upper dermis								Lower dermis
	Control	1377.98	1474.51	1542.9	1607.61	1335.12	1378.58			1088.55	1003.9	1104.2	1714.83	1440.85	1433.26
	1 day	996.948	608.207	488.043	633.411	255.241	694.834	468.517		1190.63	1100.86	802.309	1021.57	803.929	1114.79	1117.21
	4 days	888.534	648.766	719.613						1062.39	1044.99	1060.37
	8 days	1013.48	1027.27	943.003	839.96					1596.81	1425.66	1118.54	1051.65
	14 days	1563.64	1357.25	1209.61	1081.48					1494.08	1390.45	1255.84	1401.91
Control										acUVB PI1d								acUVB PI4d							acUVB PI8d								acUVB PI14d
		NON IR #1 BSO 20x-1									Sample		area	PDGFR+	PDGFRper area in mm2			Sample		area	PDGFR+	PDGFRper area in mm2				Sample		area	PDGFR+	PDGFRper area in mm2					Sum 1 BSU BSO
		Pap Area	Ret Area	FB pap	FB ret						acute UV2x PDGF yH2AX WPHG162a BSO 20x1	upper	276845	276	996.948			acUVB PI4d 1 IR BSO GFP Ki67 20x1	upper	74328	66	887.956				acUVB PI8d 1 IR BSO GFP Ki67 20x1	upper	114962	106						area		GFP		GFP per area mm2
cCasp3	NON IR #1 BSO 20x-1	185380	1136544	312	1477							lower	1194322	1422	1190.63				lower	209475	230	1097.98					lower	317216	356						pap	ret	pap	ret	pap	ret
cCasp3	NON IR #1 BSU 20x-1	89404.6	363298	111	301													acUVB PI4d 1 IR BSO GFP Ki67 20x2	upper	93364	83	888.994				acUVB PI8d 1 IR BSO GFP Ki67 20x1	upper	103489	100					cCasp3 1	605573	1.71466e+06	772	2310
cCasp3	NON IR #1 BSU 20x-2	132572	270616	148	254						acute UV2x PDGF yH2AX WPHG162J BSO 20x1	upper	149304	79	529.122				lower	146328	148	1011.43					lower	384590	429					Ki67 1	963201	4.20536e+06	1681	6535
cCasp3	NON IR #1 BSU 20x-3	125694	339010	211	500							lower	487505	399	818.453			Sum	upper	167692	149	888.534				Sum	upper	218451	206	943.003				sum	1.56877e+06	5.92001e+06	2453	8845	1563.64	1494.08
ki67	NON IR #1 BSO 20x-1	91191.9	474501	99	455						acute UV2x PDGF yH2AX WPHG162J BSO 20x2	upper	64439	51	791.446				lower	355803	378	1062.39					lower	701806	785	1118.54
ki67	NON IR #1 BSO 20x-2	75692	408231	111	405							lower	245556	408	1661.54			acUVB PI4d 2IR BSO GFP Ki67 20x1	upper	91793	24	261.458				acUVB PI8d 1 IR BSO GFP Ki67 20x1	upper	145278	81
ki67	NON IR #1 BSO 20x-3	67471.9	254001	84	287						Sum	upper	213743	130	608.207				lower	196408	212	1079.39					lower	546801	603
ki67	NON IR #1 BSU 20x-1	56807	254066	86	224							lower	733061	807	1100.86			acUVB PI4d 2 IR BSO GFP Ki67 20x2	upper	106008	68	641.461				acUVB PI8d 2 IR BSO GFP Ki67 20x2	upper	58549	22
ki67	NON IR #1 BSU 20x-3	215923	454369	283	441						acute UV2x UVB 1d A BSU yH2Ax GFP 20x1	upper	91097	61	669.616				lower	292624	333	1137.98					lower	232430	183						Sum 2 BSU BSO
ki67	NON IR #1 BSU 20x-4	130421	409873	168	407	PDGFRa desnity						lower	351109	277	788.929			acUVB PI4d 2 IR BSU GFP Ki67 20x1	upper	91290	68	744.879				acUVB PI8d 2 IR BSU GFP Ki67 20x1	upper	95598	135						area		GFP		GFP per area mm2
						pap	ret				acute UV2x UVB 1d A BSU yH2Ax GFP 20x2	upper	94306	34	360.528				lower	393341	384	976.252					lower	220525	260						pap	ret	pap	ret	pap	ret
	Sum	1.17056e+06	4.36451e+06	1613	4751	1377.98	1088.55					lower	302894	240	792.356			acUVB PI4d 2 IR BSU GFP Ki67 20x2	upper	77759	78	1003.1				acUVB PI8d 2 IR BSU GFP Ki67 20x2	upper	64878	68					cCasp3 2	754644	2.49756e+06	1078	3717
											acute UV2x UVB 1d A BSU yH2Ax GFP 20x3	upper	89163	39	437.401				lower	410457	422	1028.12					lower	177437	192					Ki67 2	692399	2.08155e+06	886	2650
												lower	259610	216	832.017			Sum	upper	366850	238	648.767				Sum	upper	364303	306	839.96				sum	1.44704e+06	4.5791e+06	1964	6367	1357.25	1390.45
											Sum	upper	274566	134	488.043				lower	1292830	1351	1044.99					lower	1177193	1238	1051.65
												lower	913613	733	802.309			acUVB PI4d 3IR BSO GFP Ki67 20x1	upper	88258	56	634.503				Pi8d B PDGFGFP Ki67 Itga6 20x1	upper	148371	157
		NON IR #2 BSO 20x-1																	lower	277740	286	1029.74					lower	542805	771
		Pap Area	Ret Area	FB pap	FB ret						acute UV2x UVB 1d J BSO yH2Ax GFP 20x1	upper	89989	57	633.411			acUVB PI4d 3IR BSO GFP Ki67 20x2	upper	91005	73	802.154				Pi8d B PDGFGFP Ki67 Itga6 20x2	upper	115078	110
cCasp3	NON IR #2 BSO 20x-1	83486.9	335931	138	383							lower	278982	285	1021.57				lower	289043	315	1089.8					lower	401579	737					Sample		area	PDGFR+	PDGFRper area in mm2
cCasp3	NON IR #2 BSO 20x-2	108674	400311	128	372													Sum	upper	179263	129	719.613				Sum	upper	263449	267	1013.48				acUVB PI14d A PI1d GFP yH2Ay Ki67 20x1	upper	78182	82
cCasp3	NON IR #2 BSO 20x-3	134453	466523	187	578						acUVB PI1d BSO 3 GFP H2Ay 20x1	upper	90408	24	265.463				lower	566783	601	1060.37					lower	944384	1508	1596.81					lower	221049	262
cCasp3	NON IR #2 BSO 20x-4	305767	1.28363e+06	509	1382							lower	314898	260	825.664																			acUVB PI14d A PI1d GFP yH2Ay Ki67 20x2	upper	42989	51
cCasp3	NON IR #2 BSU 20x-1	125397	459464	217	453							upper	81978	20	243.968											Pi8d C PDGFGFP Ki67 Itga6 20x1	upper	128618	116						lower	128745	155
cCasp3	NON IR #2 BSU 20x-2	124894	421718	213	510							lower	228682	177	774.001												lower	271560	385					acUVB PI14d A PI1d GFP yH2Ay Ki67 20x3	upper	68702	82
cCasp3	NON IR #2 BSU 20x-3	113310	330781	148	277						Sum	upper	172386	44	255.241											Pi8d C PDGFGFP Ki67 Itga6 20x2	upper	142975	163						lower	275670	382
												lower	543580	437	803.93												lower	264333	379					acUVB PI14d A PI1d GFP yH2Ay Ki67 20x4	upper	73022	103
ki67	NON IR #2 BSO 20x-1	209501	810385	239	659																					Sum	upper	271593	279	1027.27					lower	304590	369
ki67	NON IR #2 BSO 20x-2	142138	688087	207	638																						lower	535893	764	1425.66						262895	318	1209.61
ki67	NON IR #2 BSU 20x-2	74544.9	263868	111	230	PDGFRa desnity																														930054	1168	1255.84
						pap	ret				Sample		area	PDGFR+	PDGFRper area in mm2
	Sum	1.42217e+06	5.4607e+06	2097	5482	1474.51	1003.9				UV GFP PI1d BSU 20x2	upper	82065	50	609.273
												lower	293234	319	1087.87
											UV GFP PI1d BSU 20x1	upper	74807	59	788.696
												lower	262028	300	1144.92																			acUV P14
											Sum	upper	156872	109	694.834																			Sample		area	PDGFR+	PDGFRper area in mm2
												lower	555262	619	1114.79																			acUVB PI14d B PI1d GFP yH2Ay Ki67 20x1	upper	82540	137
																																			lower	255483	423
		NON IR #3 BSO 20x-1									UV GFP b cat? PI1d BSO 20x1	upper	92972	39	419.481																			acUVB PI14d B PI1d GFP yH2Ay Ki67 20x2	upper	62082	68
		Pap Area	Ret Area	FB pap	FB ret							lower	291166	298	1023.47																				lower	271684	372
cCasp3	NON IR #3 BSO 20x-1	106868	410670	151	448						UV GFP b cat? PI1d BSO 20x1	upper	64973	35	538.685																			acUVB PI14d B PI1d GFP yH2Ay Ki67 20x3	upper	82900	61
cCasp3	NON IR #3 BSO 20x-2	49288.6	173560	85	192							lower	201130	252	1252.92																				lower	254076	365
cCasp3	NON IR #3 BSO 20x-3	46948.4	212564	84	267						Sum	upper	157945	74	468.518																			acUVB PI14d B PI1d GFP yH2Ay Ki67 20x4	upper	64669	50
cCasp3	NON IR #3 BSU 20x-1	95385	305184	150	331							lower	492296	550	1117.21																				lower	294429	348
cCasp3	NON IR #3 BSU 20x-2	174156	654816	292	683																															292191	316	1081.48
cCasp3	NON IR #3 BSU 20x-3	151716	459984	222	642																															1075672	1508	1401.91
ki67	NON IR #3 BSO 20x-1	62757.2	232870	82	264
ki67	NON IR #3 BSO 20x-2	138686	608668	197	546
ki67	NON IR #3 BSU 20x-1	72254.4	270007	115	313
ki67	NON IR #3 BSU 20x-2	39781.8	171027	69	178	PDGFRa desnity
						pap	ret
	Sum	937842	3.49935e+06	1447	3864	1542.9	1104.21
Sample		area	PDGFR+	PDGFRper area in mm2
Control GFP 1 PI1d BSO 20x1	upper	31521	52	1649.69
	lower	105377	187	1774.58
Control GFP 1 PI1d BSU 20x2	upper	44990	71	1578.13
	lower	127883	213	1665.58
Sum	upper	76511	123	1607.61
	lower	233260	400	1714.82
Sample		area	PDGFR+	PDGFRper area in mm2
Control GFP PI1d BSU 20x1	upper	70682	86	1216.72
	lower	205900	293	1423.02
Control GFP PI1d BSU 20x2	upper	43914	67	1525.71
	lower	153610	225	1464.75
Sum	upper	114596	153	1335.13
	lower	359510	518	1440.85
Sample		area	PDGFR+	PDGFRper area in mm2
Control GFP PI8d BSU 20x2	upper	72862	81	1111.69
	lower	244949	347	1416.62
Control GFP PI8d BSU 20x2	upper	57707	99	1715.56
	lower	182746	266	1455.57
Sum	upper	130569	180	1378.58
	lower	427695	613	1433.26

## Sheet: Figure 1G
		Summary of total cell (DAPI+) density per area (mm2) after acUVB
			Upper dermis							Lower dermis
		Control	2453.53	2643.86	2746.73	3006.1	2696.43	2450.81		1782.79	1802.7	1837.77	3425.36	3018	2595.31
		1 day	2608.5	2517.98	2298.59	2355.81	3041.98	1821.41		3481.65	3025.6	3075.42	4926.26	5164.94	4735.58
		4 days	2350.16	2986.18	2818.39					1509.66	1935.65	1808.14
		8 days	2575.64	2407.06	2873.42	2021.41				1802.92	1780.06	2834.65	2429.59
		14 days	2946.25	2780.15	2647.44	2748.2				2735.47	2587.41	2460.07	2344.58
Control									acUVB PI 1 day								acUVB PI 4 days								acUVB PI 8 days								acUVB PI14 days
		NON IR #1 BSO 20x-1
		Pap Area	Ret Area	Total Cell pap	Total cell ret
cCasp3	NON IR #1 BSO 20x-1	185380	1136544	487	2123					Sample		area	DAPI	DAPI per area in mm2													P8d 1 IR BSO
cCasp3	NON IR #1 BSU 20x-1	89404.6	363298	189	519					IgG UV 1 GFP yH2AX Ki67 20x1	upper	56750	76						P4d 1 IR BSO								area	DAPI	DAPI per area in mm2						Sum 1 BSU BSO
cCasp3	NON IR #1 BSU 20x-2	132572	270616	274	439						lower	140181	686						area	DAPI	DAPI per area in mm2					upper	477552	1230	2575.64						area		DAPI		DAPI per area mm2
cCasp3	NON IR #1 BSU 20x-3	125694	339010	324	774					IgG UV 1 GFP yH2AX Ki67 20x2	upper	100141	148					upper	744988	1804	2421.52					lower	2.23083e+06	4022	1802.92						pap	ret	pap	ret	pap	ret
ki67	NON IR #1 BSO 20x-1	91191.9	474501	197	752						lower	187521	841					lower	4.14684e+06	6337	1528.15													cCasp3 1	605573	1.71466e+06	1494	4120
ki67	NON IR #1 BSO 20x-2	75692	408231	197	685					IgG UV 1 GFP yH2AX Ki67 20x3	upper	121465	283																					Ki67 1	963201	4.20536e+06	3128	12074
ki67	NON IR #1 BSO 20x-3	67471.9	254001	183	462						lower	235904	1142																					sum	1.56877e+06	5.92001e+06	4622	16194	2946.25	2735.47
ki67	NON IR #1 BSU 20x-1	56807	254066	164	518					Sum	upper	278356	507	1821.41
ki67	NON IR #1 BSU 20x-3	215923	454369	573	865						lower	563606	2669	4735.58					P4d 2 IR BSO								P8d 2 IR BSO
ki67	NON IR #1 BSU 20x-4	130421	409873	284	644	DAPI density				IgG UV 2 GFP yH2AX Ki67 20x1	upper	84129	310														area	DAPI	DAPI per area in mm2
						pap	ret				lower	114503	695						area	DAPI	DAPI per area in mm2					upper	396750	955	2407.06
	Sum	1.17056e+06	4.36451e+06	2872	7781	2453.53	1782.79			IgG UV 2 GFP yH2AX Ki67 20x2	upper	80011	189					upper	887439	2646	2981.61					lower	1.85387e+06	3300	1780.06						Sum 2 BSU BSO
											lower	180310	894					lower	3.78049e+06	7307	1932.82														area		DAPI		DAPI per area mm2
										IgG UV 2 GFP yH2AX Ki67 20x3	upper	87012	265																						pap	ret	pap	ret	pap	ret
											lower	190962	920																					cCasp3 2	754644	2.49756e+06	2075	6538
										Sum	upper	251152	764	3041.98												Sample		area	DAPI	DAPI per area in mm2				Ki67 2	692399	2.08155e+06	1948	5310
		NON IR #2 BSO 20x-1									lower	485775	2509	5164.94					P4d 3 IR BSO							Pi8d B PDGFGFP Ki67 Itga6 20x1	upper	148371	429					sum	1.44704e+06	4.5791e+06	4023	11848	2780.15	2587.41
		Pap Area	Ret Area	Total Cell pap	Total cell ret					IgG UV 3 GFP yH2AX Ki67 20x1	upper	78216	174						area	DAPI	DAPI per area in mm2						lower	542805	1385
cCasp3	NON IR #2 BSO 20x-1	83486.9	335931	244	690						lower	187907	857					upper	691943	1916	2769.02					Pi8d B PDGFGFP Ki67 Itga6 20x2	upper	115078	328
cCasp3	NON IR #2 BSO 20x-2	108674	400311	224	651					IgG UV 3 GFP yH2AX Ki67 20x2	upper	82621	197					lower	4.44434e+06	7924	1782.94						lower	401579	1292
cCasp3	NON IR #2 BSO 20x-3	134453	466523	334	998						lower	208347	1156													Sum	upper	263449	757	2873.42
cCasp3	NON IR #2 BSO 20x-4	305767	1.28363e+06	847	2345					IgG UV 3 GFP yH2AX Ki67 20x3	upper	123566	299														lower	944384	2677	2834.65				Sample		area	DAPI+	DAPI per area mm2
cCasp3	NON IR #2 BSU 20x-1	125397	459464	350	796						lower	220035	1023													Pi8d C PDGFGFP Ki67 Itga6 20x1	upper	128618	267					acUVB PI14d A PI1d GFP yH2Ay Ki67 20x1	upper	78182	238
cCasp3	NON IR #2 BSU 20x-2	124894	421718	368	913					Sum	upper	284403	670	2355.81													lower	271560	735						lower	221049	527
cCasp3	NON IR #2 BSU 20x-3	113310	330781	305	559						lower	616289	3036	4926.26												Pi8d C PDGFGFP Ki67 Itga6 20x2	upper	142975	282					acUVB PI14d A PI1d GFP yH2Ay Ki67 20x2	upper	42989	92
										IgG UV m GFP yH2AX Ki67 20x1	upper	83288	189														lower	264333	567						lower	128745	286
ki67	NON IR #2 BSO 20x-1	209501	810385	496	1207						lower	199760	594													Sum	upper	271593	549	2021.41				acUVB PI14d A PI1d GFP yH2Ay Ki67 20x3	upper	68702	180
ki67	NON IR #2 BSO 20x-2	142138	688087	378	1157					IgG UV m GFP yH2AX Ki67 20x2	upper	106869	254														lower	535893	1302	2429.59					lower	275670	826
ki67	NON IR #2 BSU 20x-2	74544.9	263868	214	528	DAPI density					lower	227801	690																					acUVB PI14d A PI1d GFP yH2Ay Ki67 20x4	upper	73022	186
						pap	ret			IgG UV m GFP yH2AX Ki67 20x3	upper	83489	186																						lower	304590	649
	Sum	1.42217e+06	5.4607e+06	3760	9844	2643.85	1802.7				lower	381433	1204																							262895	696	2647.44
										Sum	upper	273646	629	2298.59																						930054	2288	2460.07
											lower	808994	2488	3075.42
																																		acUV P14
		NON IR #3 BSO 20x-1								Sample		area	DAPI	DAPI per area in mm2																				Sample		area	DAPI+	DAPI per area mm2
		Pap Area	Ret Area	Total Cell pap	Total cell ret					UV GFP PI1d BSU 20x2	upper	82065	214																					acUVB PI14d B PI1d GFP yH2Ay Ki67 20x1	upper	82540	271
cCasp3	NON IR #3 BSO 20x-1	106868	410670	283	774						lower	293234	891																						lower	255483	643
cCasp3	NON IR #3 BSO 20x-2	49288.6	173560	141	345					UV GFP PI1d BSU 20x1	upper	74807	181																					acUVB PI14d B PI1d GFP yH2Ay Ki67 20x2	upper	62082	186
cCasp3	NON IR #3 BSO 20x-3	46948.4	212564	132	414						lower	262028	789																						lower	271684	634
cCasp3	NON IR #3 BSU 20x-1	95385	305184	269	584					Sum	upper	156872	395	2517.98																				acUVB PI14d B PI1d GFP yH2Ay Ki67 20x3	upper	82900	216
cCasp3	NON IR #3 BSU 20x-2	174156	654816	473	1076						lower	555262	1680	3025.6																					lower	254076	650
cCasp3	NON IR #3 BSU 20x-3	151716	459984	422	947					Sample		area	DAPI	DAPI per area in mm2																				acUVB PI14d B PI1d GFP yH2Ay Ki67 20x4	upper	64669	130
ki67	NON IR #3 BSO 20x-1	62757.2	232870	186	501					UV GFP b cat? PI1d BSO 20x1	upper	92972	229																						lower	294429	595
ki67	NON IR #3 BSO 20x-2	138686	608668	375	979						lower	291166	955																							292191	803	2748.2
ki67	NON IR #3 BSU 20x-1	72254.4	270007	185	494					UV GFP b cat? PI1d BSO 20x1	upper	64973	183																							1075672	2522	2344.58
ki67	NON IR #3 BSU 20x-2	39781.8	171027	110	317	DAPI density					lower	201130	759
						pap	ret			Sum	upper	157945	412	2608.5
	Sum	937842	3.49935e+06	2576	6431	2746.73	1837.77				lower	492296	1714	3481.65
Sample		area	DAPI	DAPI per area in mm2
Control GFP 1 PI1d BSO 20x1	upper	31521	97	3077.31
	lower	105377	361	3425.8
Control GFP 1 PI1d BSU 20x2	upper	44990	133	2956.21
	lower	127883	438	3425.01
Sum	upper	76511	230	3006.1
	lower	233260	799	3425.36
Sample		area	DAPI	DAPI per area in mm2
Control GFP PI1d BSU 20x1	upper	70682	187	2645.65
	lower	205900	623	3025.74
Control GFP PI1d BSU 20x2	upper	43914	122	2778.16
	lower	153610	462	3007.62
Sum	upper	114596	309	2696.43
	lower	359510	1085	3018
Sample		area	DAPI	DAPI per area in mm2
UV? GFP PI8d BSU 20x2	upper	72862	181	2484.15
	lower	244949	599	2445.41
UV? GFP PI8d BSU 20x1	upper	57707	139	2408.72
	lower	182746	511	2796.23
Sum	upper	130569	320	2450.81
	lower	427695	1110	2595.31
Sample		area	DAPI	DAPI per area in mm2
IgG 1 GFP yH2AX Ki67 20x1	upper	61118	126	2061.59
	lower	119855	476	3971.47
IgG 1 GFP yH2AX Ki67 20x2	upper	37012	83	2242.52
	lower	67761	291	4294.51
Sum	upper	98130	209	2129.83
	lower	187616	767	4088.14
IgG 2 GFP yH2AX Ki67 20x1	upper	54103	156	2883.39
	lower	159523	519	3253.45
IgG 2 GFP yH2AX Ki67 20x2	upper	60218	186	3088.78
	lower	158342	570	3599.8
Sum	upper	114321	342	2991.58
	lower	317865	1089	3425.98
IgG 3 GFP yH2AX Ki67 20x1	upper	56816	139	2446.49
	lower	122726	429	3495.59
IgG 3 GFP yH2AX Ki67 20x2	upper	54724	124	2265.92
	lower	130914	486	3712.36
Sum	upper	111540	263	2357.9
	lower	253640	915	3607.48
IgG m GFP yH2AX Ki67 20x2	upper	87776	186	2119.03
	lower	335494	610	1818.21
IgG m GFP yH2AX Ki67 20x3	upper	82625	214	2590.02
	lower	384917	801	2080.97
Sum	upper	170401	400	2347.4
	lower	720411	1411	1958.6

## Sheet: Figure 1H
		Summary of Ki67+ Fbs (%) after acUVB
		Upper dermis						Lower dermis
	Control	0.240674	0	0.215983				0	0.14313	0.153728
	1 day	0.138504	0.148148	0.692042	0.917431			0.0760264	0.322729	0.323363	1.93861
	4 days	3.41064	1.27877	1.05634				1.27673	0.958386	0.39312
	8 days	6.74157	0.701754	1.88679	1.17801			1.92308	0.979519	0.507042	0.716846
	14 days	0.773349	0.278293	0.628931	0.949367			0.397858	0.134517	0.684932	0.596817
Control
							acUVB PI 1 day						acUVB PI 4 day						acUVB PI 8 day
																										acUVB PI 14 days
									% of Ki67+ GFP+ fibroblasts					P4d 1 IR BSO						P8d 1 IR BSO
	NON IR #1 BSU	sum GFP	sum Ki67+ fibroblasts	% of Ki67+ GFP+ fibroblasts					WPH G16 2 a BSO-20x-1					GFP	Ki67 in GFP+	%Ki67				GFP	Ki67	%Ki67
	papillary	831	2	0.240674					FB pap	FB ret			upper	733	25	3.41064			upper	570	4	0.701754
	reticular	2219	0	0					0.277008	0.152053			lower	3133	40	1.27673			lower	2246	22	0.979519				acUV P14
									0	0																Sample		PDGFR+	Ki67+ PDGFR+	Ki67 positive Fb%
								Average	0.138504	0.0760264																acUVB PI14d A PI1d GFP yH2Ay Ki67 20x1	upper	82	2
	NON IR #2 BSU	sum GFP	sum Ki67+ fibroblasts	% of Ki67+ GFP+ fibroblasts																							lower	262	4
	papillary	619.143	0	0																						acUVB PI14d A PI1d GFP yH2Ay Ki67 20x2	upper	51	0
	reticular	2096	3	0.14313										P4d 2 IR BSO						P8d 2 IR BSO							lower	155	0
														GFP	Ki67	%Ki67				GFP	Ki67	%Ki67				acUVB PI14d A PI1d GFP yH2Ay Ki67 20x3	upper	82	0
									WPH G16 2 H BSU-20x-1				upper	782	10	1.27877			upper	371	7	1.88679					lower	382	3
	NON IR #3 BSU	sum GFP	sum Ki67+ fibroblasts	% of Ki67+ GFP+ fibroblasts					FB pap	FB ret			lower	3965	38	0.958386			lower	1775	9	0.507042				acUVB PI14d A PI1d GFP yH2Ay Ki67 20x4	upper	103	0
	papillary	463.154	1	0.215911					0.148148	0.322729																	lower	369	1
	reticular	1301	2	0.153728																								318	2	0.628931
								Average	0.148148	0.322729									Sample		PDGFR+	Ki67+ PDGFR+	Ki67 positive Fb%					1168	8	0.684932
														P4d 3 IR BSO					Pi8d B PDGFGFP Ki67 Itga6 20x1	upper	157	9	5.73248
														GFP	Ki67	%Ki67				lower	771	15	1.94553
									WPH G16 2 J BSO-20x-1				upper	568	6	1.05634			Pi8d B PDGFGFP Ki67 Itga6 20x2	upper	110	9	8.18182
									FB pap	FB ret			lower	4070	16	0.39312				lower	737	14	1.89959
									0.692042	0.323363									Sum	upper	267	18	6.74157			acUV P14
																				lower	1508	29	1.92308			Sample		PDGFR+	Ki67+ PDGFR+	Ki67 positive Fb%
								Average	0.692042	0.323363									Sample		PDGFR+	Ki67+ PDGFR+	Ki67 positive Fb%			acUVB PI14d B PI1d GFP yH2Ay Ki67 20x1	upper	137	2
																			Pi8d C PDGFGFP Ki67 Itga6 20x1	upper	116	1	0.862069				lower	423	1
									GFP	Ki67	%Ki67									lower	385	6	1.55844			acUVB PI14d B PI1d GFP yH2Ay Ki67 20x2	upper	68	1
							UV GFP PI1d BSU 20x2	upper	50	0	0								Pi8d C PDGFGFP Ki67 Itga6 20x2	upper	163	1	0.613497				lower	372	3
								lower	319	4	1.25392									lower	379	3	0.791557			acUVB PI14d B PI1d GFP yH2Ay Ki67 20x3	upper	61	0
							UV GFP PI1d BSU 20x1	upper	59	1	1.69492								Sum	upper	279	2	0.716846				lower	365	1
								lower	300	8	2.66667									lower	764	9	1.17801			acUVB PI14d B PI1d GFP yH2Ay Ki67 20x4	upper	50	0
							Sum	upper	109	1	0.917431																lower	348	4
								lower	619	12	1.93861																	316	3	0.949367
																												1508	9	0.596817
																										papillary dermis										reticular dermis
																										Maus #1	Area (µm2)	Nuclei	GFP	Ki67+ in dermis	nuclei/area in mm²	GFP/area in mm2	Ki67+ in dermis in GFP+ cells	% of Ki67+ GFP+ fibroblasts		Maus #1	Area (µm2)	Nuclei	GFP	Ki67+ in dermis	nuc/area	GFP/area	Ki67+ in dermis in GFP+ cells	% of Ki67+ GFP+ fibroblasts
																										1 BSU 20x-4	57537.4	257	113	8	4466.66	1963.94	0	0		1 BSU 20x-4	325424	972	525	10	2986.87	1613.28	2	0.380952
																										1 BSU 20x-3	141120	508	277	6	3599.79	1962.88	3	1.08303		1 BSU 20x-3	693802	2012	1058	24	2899.96	1524.93	3	0.283554
																										1 BSU 20x-2	111393	328	195	10	2944.52	1750.56	6	3.07692		1 BSU 20x-2	345703	933	470	27	2698.85	1359.55	5	1.06383
																										1 BSU 20x-1	162849	576	299	7	3537.02	1836.06	1	0.334448		1 BSU 20x-1	799593	2424	1268	42	3031.54	1585.81	3	0.236593
																										1 BSO 20x-1	112365	331	181	5	2945.75	1610.82	1	0.552486		1 BSO 20x-1	469176	1207	637	22	2572.6	1357.7	2	0.313972
																										1 BSO 20x-2	321986	959	515	7	2978.39	1599.45	1	0.194175		1 BSO 20x-2	1336555	3810	2155	43	2850.61	1612.35	8	0.37123
																										1 BSO 20x-3	55950.1	169	101	3	3020.55	1805.18	1	0.990099		1 BSO 20x-3	235106	716	422	19	3045.44	1794.94	3	0.7109
																										2 BSO 20x-1	68598.8	189	119	0	2755.15	1734.72	0	0		2 BSO 20x-1	240994	784	449	12	3253.19	1863.12	1	0.222717
																										2 BSO 20x-2	123063	339	203	3	2754.68	1649.56	3	1.47783		2 BSO 20x-2	610975	1807	1039	16	2957.57	1700.56	0	0
																										2 BSO 20x-3	104212	286	138	1	2744.4	1324.22	0	0		2 BSO 20x-3	357478	1021	578	17	2856.12	1616.88	0	0
																										2 BSU 20x-1	158437	457	235	1	2884.43	1483.24	0	0		2 BSU 20x-1	437357	915	533	8	2092.11	1218.68	1	0.187617
																										2 BSU 20x-2	101741	337	126	2	3312.33	1238.44	0	0		2 BSU 20x-2	255336	806	448	6	3156.63	1754.55	1	0.223214
																										2 BSU 20x-3	102802	275	148	1	2675.03	1439.66	0	0		2 BSU 20x-3	437252	914	497	11	2090.33	1136.64	1	0.201207
																										2 BSU 20x-4	95789	192	109	2	2004.41	1137.92	0	0		2 BSU 20x-4	158163	291	173	4	1839.87	1093.81	1	0.578035
																										Mouse 1	963201	3128	1681	46	1745.22		13	0.773349		Mouse 1	4.20536e+06	12074	6535	187	1553.97		26	0.397858
																										Mouse 2	754644	2075	1078	10	1428.49		3	0.278293		Mouse 2	2.49756e+06	6538	3717	74	1488.26		5	0.134517
