# Supplementary material for: Role of distinct fibroblast lineages and immune cells in dermal repair following UV radiation-induced tissue damage
Source: eLife journal article supplement (doi:10.7554/elife.71052), 2021-12-23
Supplement: supp [file elife-71052-supp-v1.zip › elife_poa_e71052_Figure_2_source_data_1.xlsx]

## Sheet: Figure 2B
		Summary Ki67+ Fbs after chUVB (%)
		Upper dermis			Lower dermis
	Control	2.8169	0.5714	1.7241	3.11	4.3643	5.4755
	chUVB	0.7042	0.7874	2.6923	4.6931	1.0352	3.6307
Ki67 positive PDGFR H2B cells		SD: 3, 100, filter 20
DAPI		SD: 3, 200, filter 20
			acUVB											Control
		chUVB	area	DAPI area	PDGF area	DAPI positive	Ki67 positive	% of total	PDGFRH2B positve	Number Ki67 positivePDGFH2B	%				area	DAPI area	PDGF area	DAPI positive	Ki67 positive	% of total	PDGFRH2B positve	Number Ki67 positivePDGFH2B	%
	GFP1 20x1	Papillary	50827	2754.44	1514.94	140	16	0.114286	77	0			UV control GFP1 20x 1	Papillary	45957	2763.45	1501.4	127	31	0.244094	69	3
		Reticular	131065	3654.68	1777.74	479	166	0.346555	233	8			but wholes in tissue section	Reticular	134729	2835.32	1350.86	382	157	0.410995	182	7
	GFP1 20x2	Papillary	97015	2391.38	669.999	232	40	0.172414	65	1			UV control GFP1 20x 2	Papillary	47827	2718.13	1526.33	130	27	0.207692	73	1
		Reticular	228177	3370.19	1406.8	769	243	0.315995	321	18				Reticular	129877	3272.33	1817.1	425	122	0.287059	236	6
	Sum	Papillary	147842	2516.2	960.485	372	56	0.150538	142	1	0.704225		Sum	Papillary	93784	2740.34	1514.12	257	58	0.225681	142	4	2.8169
		Reticular	359242	3473.98	1542.14	1248	409	0.327724	554	26	4.69314			Reticular	264606	3049.82	1579.71	807	279	0.345725	418	13	3.11005
	GFP2 20x1	Papillary	84469	1799.48	686.642	152	17	0.111842	58	0			UV control GFP2 20x 1	Papillary	48631	2837.7	2159.12	138	11	0.0797101	105	1
		Reticular	186640	3209.39	1312.69	599	161	0.268781	245	3				Reticular	122212	4238.54	2683.86	518	128	0.247104	328	11
	GFP2 20x2	Papillary	114196	1961.54	604.224	224	24	0.107143	69	1			UV control GFP2 20x 2	Papillary	34709	2996.34	2016.77	104	9	0.0865385	70	0
		Reticular	237715	3041.46	1001.2	723	244	0.337483	238	2				Reticular	84656	4500.57	2350.69	381	102	0.267717	199	12
	Sum	Papillary	198665	1892.63	639.267	376	41	0.109043	127	1	0.787402		Sum	Papillary	83340	2903.77	2099.83	242	20	0.0826446	175	1	0.571429
		Reticular	424355	3115.32	1138.2	1322	405	0.306354	483	5	1.0352			Reticular	206868	4345.77	2547.52	899	230	0.25584	527	23	4.36433
	GFP3 20x1	Papillary	78786	3147.77	1624.65	248	60	0.241935	128	1			UV control GFP3 20x 1	Papillary	22962	2525.91	1742.01	58	7	0.12069	40	1
		Reticular	250042	3963.33	1983.67	991	291	0.293643	496	15				Reticular	55431	3932.82	2525.66	218	80	0.366972	140	12
	GFP3 20x3	Papillary	85319	3164.59	1547.13	270	90	0.333333	132	6			UV control GFP3 20x 2	Papillary	42166	2395.29	1802.4	101	9	0.0891089	76	1
		Reticular	240073	3982.12	1949.41	956	315	0.329498	468	20				Reticular	89242	3709.02	2319.54	331	83	0.250755	207	7
	Sum	Papillary	164105	3156.52	1584.35	518	150	0.289575	260	7	2.69231		Sum	Papillary	65128	2441.35	1781.11	159	16	0.100629	116	2	1.72414
		Reticular	490115	3972.54	1966.89	1947	606	0.311248	964	35	3.63071			Reticular	144673	3794.76	2398.51	549	163	0.296903	347	19	5.4755

## Sheet: Figure 2C
		Summary of cCasp3+ Fbs after chUVB (%)
		Upper dermis									Lower dermis
	Control	0.12	0	0							0	0	0.1
	chUVB	0	0	0	0	0.1	0.37	0.19	0.14	0	0.04	0.06	0	0.1	0.1	0.13	0.04	0.2	0.08
	Chronic UVB treated	DAPI sensitivity 500 - object size 7 pixels -filtering min size 10 pixels
		GFP sensitivity 170- object size 7 pixels -filtering min size 35 pixels
		cCasp3 - manually counted
	cCasp3						cCasp3-Staining - controls
	sample		GFP	cCasp3+ in GFP+ cells	% of cCasp3+ GFP+ fibroblasts		sample		GFP	cCasp3+ in GFP+ cells	% of cCasp3+ GFP+ fibroblasts
	#1 BSO 20x-1	papillary	216	0	0		C1 BSO 20x-1	papillary	51	0	0
		reticular	616	1	0.162338			reticular	130	0	0
	#1 BSO 20x-2	papillary	241	0	0		C1 BSO 20x-2	papillary	127	0	0
		reticular	648	0	0			reticular	256	0	0
	#1 BSU 20x-1	papillary	69	0	0		C1 BSO 20x-3	papillary	148	0	0
		reticular	224	0	0			reticular	401	0	0
	#1 BSU 20x-2	papillary	133	0	0		C1 BSU 20x-1	papillary	108	0	0
		reticular	328	0	0			reticular	221	0	0
	#1 BSU 20x-3	papillary	157	0	0		C1 BSU 20x-2	papillary	194	0	0
		reticular	342	0	0			reticular	382	0	0
	#1 BSU 20x-4	papillary	100	0	0		C1 BSU 20x-3	papillary	185	1	0.540541
		reticular	213	0	0			reticular	307	0	0
	#2 BSO 20x-1	papillary	61	0	0		C2 BSO 20x-1	papillary	517	0	0
		reticular	207	0	0			reticular	890	0	0
	#2 BSO 20x-2	papillary	130	0	0		C2 BSO 20x-2	papillary	117	0	0
		reticular	388	0	0			reticular	292	0	0
	#2 BSO 20x-3	papillary	110	0	0		C2 BSU 20x-1	papillary	239	0	0
		reticular	349	0	0			reticular	436	0	0
	#2 BSO 20x-4	papillary	64	0	0		C2 BSU 20x-2	papillary	209	0	0
		reticular	174	0	0			reticular	401	0	0
	#2 BSO 20x-5	papillary	48	0	0		C2 BSU 20x-3	papillary	114	0	0
		reticular	277	1	0.361011			reticular	297	0	0
	#2 BSU 20x-2	papillary	80	0	0		C3 BSU 20x-1	papillary	109	0	0
		reticular	393	0	0			reticular	196	0	0
	#3 BSO 20x-1	papillary	203	0	0		C3 BSU 20x-2	papillary	123	0	0
		reticular	764	0	0			reticular	227	0	0
	#3 BSO 20x-2	papillary	152	0	0		C3 BSU 20x-3	papillary	232	0	0
		reticular	665	0	0			reticular	552	1	0.181159
	#3 BSU 20x-1	papillary	207	0	0
		reticular	503	0	0
	#3 BSU 20x-2	papillary	101	0	0
		reticular	346	0	0
	#3 BSU 20x-3	papillary	213	0	0
		reticular	710	0	0
	#3 BSU 20x-4	papillary	108	0	0
		reticular	347	0	0
	#3 BSU 20x-5	papillary	30	0	0
		reticular	108	0	0
	#4 BSO 20x-1	papillary	331	0	0
		reticular	1004	0	0
	#4 BSO 20x-2	papillary	107	0	0
		reticular	332	0	0
	#4 BSO 20x-3	papillary	200	0	0
		reticular	610	1	0.163934
	#4 BSU 20x-1	papillary	88	0	0
		reticular	163	0	0
	#4 BSU 20x-2	papillary	42	0	0
		reticular	124	0	0
	#4 BSU 20x-3	papillary	113	0	0
		reticular	347	1	0.288184
	#4 BSU 20x-4	papillary	123	0	0
		reticular	447	1	0.223714
	#5 BSO 20x-1	papillary	265	0	0
		reticular	875	1	0.114286
	#5 BSO 20x-2	papillary	177	0	0
		reticular	776	0	0
	#5 BSU 20x-1	papillary	132	0	0
		reticular	363	0	0
	#5 BSU 20x-2	papillary	79	1	1.26582
		reticular	227	0	0
	#5 BSU 20x-3	papillary	394	0	0
		reticular	789	2	0.253485
	#6 BSO 20x-1	papillary	43	1	2.32558
		reticular	169	0	0
	#6 BSO 20x-2	papillary	156	1	0.641026
		reticular	800	3	0.375
	#6 BSO 20x-3	papillary	94	0	0
		reticular	412	0	0
	#6 BSO 20x-4	papillary	171	1	0.584795
		reticular	571	0	0
	#6 BSU 20x-1	papillary	122	0	0
		reticular	410	1	0.243902
	#6 BSU 20x-2	papillary	69	0	0
		reticular	238	0	0
	#6 BSU 20x-3	papillary	153	0	0
		reticular	433	0	0
	#7 BSO 20x-1	papillary	96	0	0
		reticular	138	0	0
	#7 BSO 20x-2	papillary	204	0	0
		reticular	488	0	0
	#7 BSO 20x-3	papillary	243	0	0
		reticular	676	0	0
	#7 BSU 20x-1	papillary	48	0	0
		reticular	83	0	0
	#7 BSU 20x-2	papillary	84	1	1.19048
		reticular	294	1	0.340136
	#7 BSU 20x-3	papillary	207	0	0
		reticular	445	0	0
	#7 BSU 20x-4	papillary	166	1	0.60241
		reticular	485	0	0
	#8 BSO 20x-1	papillary	75	0	0
		reticular	116	0	0
	#8 BSO 20x-2	papillary	56	0	0
		reticular	140	1	0.714286
	#8 BSO 20x-3	papillary	119	1	0.840336
		reticular	286	1	0.34965
	#8 BSO 20x-4	papillary	151	0	0
		reticular	442	0	0
	#8 BSO 20x-5	papillary	56	0	0
		reticular	164	0	0
	#8 BSO 20x-6	papillary	31	0	0
		reticular	136	0	0
	#8 BSU 20x-1	papillary	94	0	0
		reticular	302	0	0
	#8 BSU 20x-2	papillary	157	0	0
		reticular	450	2	0.444444
	#9 BSO 20x-1	papillary	301	0	0
		reticular	802	0	0
	#9 BSO 20x-2	papillary	233	0	0
		reticular	682	1	0.146628
	#9 BSU 20x-1	papillary	196	0	0
		reticular	702	1	0.14245
	#9 BSU 20x-2	papillary	213	0	0
		reticular	479	0	0
	UVB treated mice						control mice
			Summe GFP+	Summe cCasp3+ GFP					Summe GFP+	Summe cCasp3+ GFP
	treated mice		GFP	cCasp3+ in GFP+ cells	% of cCasp3+ GFP+ fibroblasts		controls		GFP	cCasp3+ in GFP+ cells	% of cCasp3+ GFP+ fibroblasts
	#1	papillary	916	0	0		#1	papillary	813	1	0.123001
		reticular	2371	1	0.0421763			reticular	1697	0	0
	#2	papillary	493	0	0		#2	papillary	1196	0	0
		reticular	1788	1	0.0559284			reticular	2316	0	0
	#3	papillary	1014	0	0		#3	papillary	464	0	0
		reticular	3443	0	0			reticular	975	1	0.102564
	#4	papillary	1004	0	0
		reticular	3027	3	0.099108
	#5	papillary	1047	1	0.095511
		reticular	3030	3	0.0990099
	#6	papillary	808	3	0.371287
		reticular	3033	4	0.131883
	#7	papillary	1048	2	0.19084
		reticular	2609	1	0.0383289
	#8	papillary	739	1	0.135318
		reticular	2036	4	0.196464
	#9	papillary	943	0	0
		reticular	2665	2	0.0750469

## Sheet: Figure 2D
	Summary CD45 expression after chUVB exposure
		Upper dermis				Lower dermis
	Control	335.177	331.954	427.6		275.806	269.669	318.082
	chUVB	432.159	674.921	668.801	736.9	417.919	612.061	633.88	572.648
sample		Area in µm2	sum intensity AF 633 - CD45	AF633 intensity/ area in µm²		sample		Area in µm2	sum intensity AF 633 - CD45	AF633 intensity/ area in µm²
#3 BSO 20x-1	papillary	198981	82000000	412.099		C1 BSO 20x-1	papillary	35165.1	13200000	375.372
	reticular	499754	254000000	508.25			reticular	78999.6	26100000	330.381
#3 BSO 20x-2	papillary	166046	100710000	606.519		C1 BSO 20x-2	papillary	78769.5	26716000	339.167
	reticular	396250	217140000	547.987			reticular	168101	47473000	282.407
#3 BSU 20x-1	papillary	112540	36633000	325.511		C1 BSO 20x-3	papillary	122154	58461000	478.582
	reticular	244976	101600000	414.734			reticular	291233	105740000	363.077
#3 BSU 20x-2	papillary	65593.1	22405000	341.576		C1 BSU 20x-1	papillary	63520.2	14783000	232.729
	reticular	172079	54555000	317.034			reticular	109189	23345000	213.803
#3 BSU 20x-3	papillary	171235	68412000	399.521		C1 BSU 20x-2	papillary	124384	35000000	281.388
	reticular	376929	107350000	284.801			reticular	229932	52200000	227.023
#3 BSU 20x-4	papillary	96939.3	42932000	442.875		C1 BSU 20x-3	papillary	132608	38400000	289.575
	reticular	209446	65902000	314.649			reticular	213738	46100000	215.685
#3 BSU 20x-5	papillary	39766.2	14719000	370.138		C2 BSO 20x-1	papillary	328980	152000000	462.034
	reticular	78726.9	26164000	332.339			reticular	677930	215000000	317.142
#4 BSO 20x-1	papillary	256530	167870000	654.388		C2 BSO 20x-2	papillary	77268.4	36461000	471.875
	reticular	599022	306220000	511.2			reticular	186399	65559000	351.713
#4 BSO 20x-2	papillary	75354.7	32515000	431.493		C2 BSU 20x-1	papillary	151246	34800000	105.782
	reticular	172625	98823000	572.471			reticular	238499	53500000	78.9168
#4 BSO 20x-3	papillary	168116	113370000	674.355		C2 BSU 20x-2	papillary	143478	18855900	131.42
	reticular	390527	212940000	545.263			reticular	226200	41299000	182.577
#4 BSU 20x-1	papillary	49006.2	15496000	316.205		C2 BSU 20x-3	papillary	71988.7	14471000	201.018
	reticular	84297.9	46285000	549.065			reticular	189334	34098000	180.094
#4 BSU 20x-2	papillary	25066	3940178	157.192		C3 BSU 20x-1	papillary	65780.5	32506000	494.159
	reticular	70698.9	21228000	300.259			reticular	122479	36820000	300.622
#4 BSU 20x-3	papillary	100604	87178000	866.546		C3 BSU 20x-2	papillary	69949.9	30000000	428.878
	reticular	228039	164720000	722.333			reticular	131598	44500000	338.15
#4 BSU 20x-4	papillary	120585	120310000	997.722		C3 BSU 20x-3	papillary	122469	47900000	391.12
	reticular	303912	281560000	926.452			reticular	307789	97400000	316.45
#5 BSO 20x-1	papillary	280094	176000000	628.36
	reticular	737285	459000000	622.555
#5 BSO 20x-2	papillary	194118	167000000	860.304
	reticular	610318	482000000	789.752
#5 BSU 20x-1	papillary	152272	99000000	650.152
	reticular	270551	178000000	657.916
#5 BSU 20x-2	papillary	70050.1	48700000	695.217
	reticular	158378	93700000	591.624
#5 BSU 20x-3	papillary	227358	127200000	559.471
	reticular	413109	175270000	424.27
#6 BSO 20x-1	papillary	59599.6	50100000	840.61
	reticular	126625	97900000	773.147
#6 BSO 20x-2	papillary	171096	131000000	765.652
	reticular	487223	260000000	533.637
#6 BSO 20x-3	papillary	82581.3	71900000	870.657
	reticular	244665	139000000	568.123
#6 BSO 20x-4	papillary	140752	90700000	644.396
	reticular	324649	183000000	563.686
#6 BSU 20x-1	papillary	120686	85225000	706.169
	reticular	265237	158930000	599.2
#6 BSU 20x-2	papillary	76479	60332000	788.87
	reticular	191246	133770000	699.464
#6 BSU 20x-3	papillary	119282	78507000	658.163
	reticular	254675	112180000	440.483
Sum and summary
UVB treated mice						control mice
treated mice		Area in µm2	sum intensity AF 633 - CD45	CD45 AF633 intensity/ area in µm²		controls		Area in µm2	sum intensity AF 633 - CD45	AF633 intensity/ area in µm²
#3	papillary	851101	367811000	432.159		#1	papillary	556601	186560000	335.177
	reticular	1.97816e+06	826711000	417.919			reticular	1.09119e+06	300958000	275.806
#4	papillary	795262	536739000	674.921		#2	papillary	772961	256587900	331.954
	reticular	1.84912e+06	1131776000	612.061			reticular	1.51836e+06	409456000	269.669
#5	papillary	923892	617900000	668.801		#3	papillary	258199	110406000	427.6
	reticular	2189641	1387970000	633.88			reticular	561867	178720000	318.082
#6	papillary	770476	567764000	736.9
	reticular	1.89432e+06	1084780000	572.648

## Sheet: Figure 2F
		Summary of CHP intensity after chUVB (MFI)
		Upper dermis					Lower dermis
	Control	826.5	860.5	910.5	669	606.5	790.5	667	850	360	454.5
	chUVB	1780.5	1294	1311.5			1613.5	945	1076.5
	Control						chUVB
			Mean Intesnity AU CHP
	acUV Con GFP1 CD45 20x1	Upper	582						Mean Intesnity AU CHP
		Lower	679				chUV PI3d GFP1 CD45 CHP 20x1	Upper	1526
	acUV Con GFP1 CD45 20x2	Upper	1071					Lower	1513
		Lower	902				chUV PI3d GFP1 CD45 CHP 20x2	Upper	2035
	Average	Upper	826.5					Lower	1714
		Lower	790.5				Average	Upper	1780.5
								Lower	1613.5
			Mean Intesnity AU CHP						Mean Intesnity AU CHP
	acUVCon GFP2 CD45 20x1	Upper	900				chUV PI3d GFP2 CD45 CHP 20x1	Upper	1366
		Lower	647					Lower	1022
	acUV Con GFP1 CD45 20x2	Upper	821				chUV PI3d GFP2 CD45 CHP 20x1	Upper	1222
		Lower	687					Lower	868
	Average	Upper	860.5				Average	Upper	1294
		Lower	667					Lower	945
									Mean Intesnity AU CHP
							chUV PI3d GFP3 CD45 CHP 20x1	Upper	1556
			Mean Intesnity AU CHP					Lower	1328
	Con GFP 1 CD45 CHP 20x1	Upper	813				chUV PI3d GFP3 CD45 CHP 20x2	Upper	1067
		Lower	798					Lower	825
	ConGFP1 CD45 CHP 20x1	Upper	1008				Average	Upper	1311.5
		Lower	902					Lower	1076.5
	Average	Upper	910.5
		Lower	850
			Mean Intesnity AU CHP
	Con GFP 2 CD45 CHP 20x1	Upper	715
		Lower	430
	chAC GFP2 CD45 CHP 20x1	Upper	623
		Lower	290
	Average	Upper	669
		Lower	360
			Mean Intesnity AU CHP
	Con GFP 3 CD45 CHP 20x1	Upper	709
		Lower	533
	Con GFP3 CD45 CHP 20x1	Upper	504
		Lower	376
	Average	Upper	606.5
		Lower	454.5

## Sheet: Figure 2G
		Summary of yH2AX+ Fbs after chUVB (%)
		Upper dermis									Lower dermis
	Control	4.77759	6.04915	0.647948	2.16216	1.28205	0				2.81938	2.87823	1.44928	5.38462	2.33813	2.45776
	1 day	31.6043	6.65557	21.0728	2.98013	9.07407	8.8015	31.5113	21.6023	51.7997	21.3976	6.29921	21.7153	5.46245	10.1005	8.56197	17.1236	7.68415	30.5482
	3 days	8	5.92105	7.75194	7.91367	9.45946	17.9487				4.2641	4.46927	2.91519	5.39419	6.79758	5.8209
	7 days	1.89873	3.8961	10.9091	4.61538	5.26316	0.952381				2.26131	2.48566	2.57426	1.17253	1.9469	1.68539
	10 days	5.73771	4.78261	4.25532	2.72727	4.91803					2.61538	2.59259	4.75247	1.21951	2.51989
PDGFR H2B cells		SD: 3, 100, filter 20										PDGFR H2B cells		SD: 3, 100, filter 20											PDGFR H2B cells		SD: 3, 100, filter 20
DAPI		SD: 3, 200, filter 20										DAPI		SD: 3, 200, filter 20											DAPI		SD: 3, 200, filter 20								PDGFR H2B cells		SD: 3, 100, filter 20								PDGFR H2B cells		SD: 3, 100, filter 20
yH2Ax		SD:4, 100, filter 20										yH2Ax		SD:4, 100, filter 20											yH2Ax		SD:4, 100, filter 20								DAPI		SD: 3, 200, filter 20								DAPI		SD: 3, 200, filter 20
																																			yH2Ax		SD:4, 100, filter 20								yH2Ax		SD:4, 100, filter 20
control mice												UVB treated mice PI 1day													UVB treated mice PI 3days										UVB treated mice PI 7days										UVB treated mice PI 10 days
UV_C1_BSO 20x1			area	DAPI	GFP	yH2AX +	yH2AX+ GFP+	positive per area	% double positive	% of total		UV_1_BSO 20x1			area µm2	DAPI	GFP	yH2AX +	yH2AX+ GFP+	positive per area mm2	% double positive	% of total			Sample		area	PDGFR+	yH2Ax+	yH2Ax+ PDGFR+	DAPI	yH2Ax positive Fb%			Sample		area	PDGFR+	yH2Ax+	yH2Ax+ PDGFR+	DAPI	yH2Ax positive Fb%			Sample		area	PDGFR+	yH2Ax+
		papillary	68589	179	94	12	1	174.955	1.06383					papillary	92799	255	108	62	7	668.111	6.48148				chUVB PI3d yH2AX Ki67 1 BSO 20x1	upper	87288	76	42	7	257				chUVB PI 7d yH2AX CD31 1 BSO 20x1	upper	80830	61	22	0	160				chUVB PI10d yH2AX CD31 A1 20x1	upper	118774	81	35
		reticular	220926	521	274	13	2	58.8432	0.729927					reticular	296932	523	259	68	10	229.009	3.861					lower	259267	325	136	21	649					lower	144208	159	52	2	316					lower	281550	343	104
CD45_UV_C1_BSO 20x1		papillary	134302	428	196	17	1	126.58	0.510204			CD45_UV_1_BSO 20x1		papillary	192791	574	256	200	28	1037.39	10.9375				chUVB PI3d yH2AX Ki67 1 BSO 20x2	upper	29474	28	15	2	87				chUVB PI 7d yH2AX CD31 1 BSO 20x1	upper	88944	97	37	3	236				chUVB PI10d yH2AX CD31 A1 20x2	upper	85695	41	25
		reticular	213987	614	347	19	0	88.7904	0					reticular	507462	1323	660	327	31	644.383	4.69697					lower	75366	113	61	6	237					lower	181418	239	89	7	550					lower	244765	307	90
	sum	papillary	202891	607	290	29	2	142.934	0.689655	4.77759			sum	papillary	285590	829	364	262	35	917.399	9.61538	31.6043			chUVB PI3d yH2AX Ki67 1 BSO 20x3	upper	100551	121	46	9	306				Sum	upper	169774	158	59	3	396	1.89873			Sum	upper	204469	122	60
	sum	reticular	434913	1135	621	32	2	73.5779	0.322061	2.81938			sum	reticular	804394	1846	919	395	41	491.053	4.46137	21.3976				lower	174611	289	97	4	560					lower	325626	398	141	9	866	2.26131				lower	526315	650	194
																									Sum	upper	217313	225	103	18	650	8			chUVB PI7d yH2AX CD31 1BSU 20x1	upper	84028	46	13	1	142				chUVB PI10d yH2AX CD31 A2 20x1	upper	79975	67	24
																										lower	509244	727	294	31	1446	4.2641				lower	214508	269	112	9	475					lower	160100	200	47
UV_C2_BSO 20x1			area	DAPI	GFP	yH2AX +	yH2AX+ GFP+	positive per area	% double positive	% of total		UV_2_BSO 20x1			area	DAPI	GFP	yH2AX +	yH2AX+ GFP+	positive per area	% double positive	% of total			chUVB PI3d yH2AX Ki67 1 BSU 20x1	upper	68842	81	52	7	156				chUVB PI7d yH2AX CD31 1BSU 20x2	upper	70697	31	15	2	135				chUVB PI10d yH2AX CD31 A2 20x2	upper	90404	77	31
		papillary	78593	224	128	18	2	229.028	1.5625					papillary	96329	209	71	5	0	51.9054	0					lower	179832	288	142	15	518					lower	258970	254	70	4	495					lower	169146	266	79
		reticular	202776	628	327	23	0	113.426	0					reticular	230704	410	220	21	2	91.0257	0.909091				chUVB PI3d yH2AX Ki67 1 BSU 20x2	upper	75491	71	28	2	177				Sum	upper	154725	77	28	3	277	3.8961			chUVB PI10d yH2AX CD31 A2 20x3	upper	77876	86	20
		papillary	109389	305	180	14	0	127.984	0			CD45 UV_2_BSO 20x1		papillary	158317	392	121	35	2	221.075	1.65289					lower	161438	249	123	9	487					lower	473478	523	182	13	970	2.48566				lower	207019	344	91
		reticular	257844	727	420	16	0	62.053	0					reticular	460475	987	483	67	2	145.502	0.414079				Sum	upper	144333	152	80	9	333	5.92105			chUVB PI7d yH2AX CD31 2BSO 20x1	upper	62545	29	18	6	136				Sum	upper	248255	230	75
	sum	papillary	187982	529	308	32	2	170.229	0.649351	6.04915			sum	papillary	254646	601	192	40	2	157.081	1.04167	6.65557				lower	341270	537	265	24	1005	4.46927				lower	222441	265	141	11	560					lower	536265	810	217
	sum	reticular	460620	1355	747	39	0	84.6685	0	2.87823			sum	reticular	691179	1397	703	88	4	127.319	0.56899	6.29921			chUVB PI3d yH2AX Ki67 2 BSO 20x1	upper	87081	63	35	6	245				chUVB PI7d yH2AX CD31 2BSO 20x2	upper	59319	26	12	0	135				chUVB PI10d yH2AX CD31 B1 20x1	upper	78932	42	9
UV_C3_BSO 20x1			area	DAPI	GFP	yH2AX +	yH2AX+ GFP+	positive per area	% double positive	% of total		UV_3_BSO 20x1			area	DAPI	GFP	yH2AX +	yH2AX+ GFP+	positive per area		% of total				lower	213546	319	120	15	715					lower	210509	240	122	2	625					lower	196635	236	67
		papillary	66610	247	117	1	0	15.0128	0					papillary	74115	250	81	46	1	620.657	1.23457				chUVB PI3d yH2AX Ki67 2 BSO 20x2	upper	101145	43	42	4	330				Sum	upper	121864	55	30	6	271	10.9091			chUVB PI10d yH2AX CD31 B1 20x2	upper	76337	52	31
		reticular	165310	483	250	8	0	48.3939	0					reticular	254566	929	365	204	16	801.364	4.38356					lower	252789	413	102	11	949					lower	432950	505	263	13	1185	2.57426				lower	217496	269	85
CD45_UV_C3_BSO 20x1		papillary	86484	216	117	2	0	23.1257	0			CD45 UV_3_BSO 20x1	papillary		85281	272	95	64	4	750.46	4.21053				chUVB PI3d yH2AX Ki67 2 BSO 20x3	upper	84696	23	20	0	222				chUVB PI7d yH2AX CD31 2BSU 20x1	upper	67985	36	15	0	165				Sum	upper	155269	94	40
		reticular	283532	759	384	10	0	35.2694	0				reticular		226682	715	343	153	17	674.954	4.95627					lower	304400	400	136	7	1064					lower	223970	314	116	4	633					lower	414131	505	152
	sum	papillary	153094	463	234	3	0	19.5958	0	0.647948			sum	papillary	159396	522	176	110	5	690.105	2.84091	21.0728			Sum	upper	272922	129	97	10	797	7.75194			chUVB PI7d yH2AX CD31 2BSU 20x2	upper	60764	29	28	3	123				chUVB PI10d yH2AX CD31 C1 20x1	upper	58204	52	15
	sum	reticular	448842	1242	634	18	0	40.1032	0	1.44928			sum	reticular	481248	1644	708	357	33	741.821	4.66102	21.7153				lower	770735	1132	358	33	2728	2.91519				lower	227241	283	177	3	671					lower	223674	292	69
																									chUVB PI3d yH2AX Ki67 2 BSU 20x1	upper	78571	73	36	4	223				Sum	upper	128749	65	43	3	288	4.61538			chUVB PI10d yH2AX CD31 C1 20x2	upper	58584	58	13
												UV_4_BSO 20x1			area	DAPI	GFP	yH2AX +	yH2AX+ GFP+	positive per area		% of total				lower	215564	269	139	11	594					lower	451211	597	293	7	1304	1.17253				lower	240699	364	73
														papillary	84960	226	80	13	1	153.013	1.25				chUVB PI3d yH2AX Ki67 2 BSU 20x2	upper	51102	66	28	7	167				chUVB PI7d yH2AX CD31 3BSO 20x1	upper	58162	46	25	3	137				Sum	upper	116788	110	28
														reticular	203832	653	317	51	6	250.206	1.89274					lower	141877	213	110	15	426					lower	197422	271	128	7	586					lower	464373	656	142
												CD45 UV_4_BSO 20x1		papillary	133012	378	146	5	1	37.5906	0.684932				Sum	upper	129673	139	64	11	390	7.91367			chUVB PI7d yH2AX CD31 3BSO 20x2	upper	60732	49	13	2	129				chUVB PI10d yH2AX CD31 C2 20x1	upper	68752	62	23
														reticular	310400	958	481	37	5	119.201	1.0395					lower	357441	482	249	26	1020	5.39419				lower	242903	294	113	4	631					lower	249094	415	84
													sum	papillary	217972	604	226	18	2	82.5794	0.884956	2.98013			chUVB PI3d yH2AX Ki67 3 BSO 20x1	upper	75891	67	44	6	159				Sum	upper	118894	95	38	5	266	5.26316			chUVB PI10d yH2AX CD31 C2 20x2	upper	59845	60	22
													sum	reticular	514232	1611	798	88	11	171.129	1.37845	5.46245				lower	188148	300	136	17	535					lower	440325	565	241	11	1217	1.9469				lower	187354	339	76
												UV_5_BSO 20x1			area	DAPI	GFP	yH2AX +	yH2AX+ GFP+	positive per area		% of total			chUVB PI3d yH2AX Ki67 3 BSO 20x2	upper	61381	81	41	8	153				chUVB PI7d yH2AX CD31 3BSU 20x1	upper	35541	43	14	1	94				Sum	upper	128597	122	45
														papillary	49166	150	58	13	2	264.41	3.44828					lower	205931	362	199	28	642					lower	83741	138	68	4	245					lower	436448	754	160
														reticular	158647	554	281	51	3	321.468	1.06762				Sum	upper	137272	148	85	14	312	9.45946			chUVB PI7d yH2AX CD31 3BSU 20x2	upper	49255	62	18	0	115
												CD45 UV_5_BSO 20x1		papillary	140764	390	135	36	2	255.747	1.48148					lower	394079	662	335	45	1177	6.79758				lower	138969	218	80	2	434
														reticular	459123	1436	648	150	10	326.71	1.54321				chUVB PI3d yH2AX Ki67 3 BSU 20x1	upper	45686	37	32	5	153				Sum	upper	84796	105	32	1	209	0.952381
													sum	papillary	189930	540	193	49	4	257.99	2.07254	9.07407				lower	176248	226	112	11	472					lower	222710	356	148	6	679	1.68539
													sum	reticular	617770	1990	929	201	13	325.364	1.39935	10.1005			chUVB PI3d yH2AX Ki67 3 BSU 20x2	upper	48841	41	47	8	126
												UV_6_BSO 20x1			area	DAPI	GFP	yH2AX +	yH2AX+ GFP+	positive per area		% of total				lower	182087	239	175	20	539
														papillary	77657	254	87	28	4	360.56	4.5977				chUVB PI3d yH2AX Ki67 3 BSU 20x3	upper	54860	39	45	8	166
														reticular	281140	894	426	47	3	167.176	0.704225					lower	168448	205	87	8	465
														papillary	106188	280	82	19	2	178.928	2.43902				Sum	upper	149387	117	124	21	445	17.9487
														reticular	346560	1220	508	134	9	386.657	1.77165					lower	526783	670	374	39	1476	5.8209
													sum	papillary	183845	534	169	47	6	255.65	3.5503	8.8015
													sum	reticular	627700	2114	934	181	12	288.354	1.2848	8.56197
												UV_7_BSO 20x1			area	DAPI	GFP	yH2AX +	yH2AX+ GFP+	positive per area		% of total
														papillary	83165	181	71	66	15	793.603	21.1268
														reticular	265807	610	280	110	11	413.834	3.92857
												CD45 UV_7_BSO 20x2		papillary	204400	441	183	130	18	636.008	9.83607
														reticular	813988	1761	897	296	30	363.642	3.34448
													sum	papillary	287565	622	254	196	33	681.585	12.9921	31.5113
													sum	reticular	1079795	2371	1177	406	41	375.997	3.48343	17.1236
												UV_8_BSO 20x1			area	DAPI	GFP	yH2AX +	yH2AX+ GFP+	positive per area		% of total
														papillary	86286	254	80	60	11	695.362	13.75
														reticular	325880	495	269	43	7	131.95	2.60223
												CD45 UV_8_BSO 20x2		papillary	165726	445	155	91	9	549.099	5.80645
														reticular	640308	1392	716	102	10	159.298	1.39665
													sum	papillary	252012	699	235	151	20	599.178	8.51064	21.6023
													sum	reticular	966188	1887	985	145	17	150.074	1.72589	7.68415
[truncated: 3 more columns]

## Sheet: Figure 2H&I
		Summary of Fb desnity after chUVB per area mm2 (Figure H)																	Summary of DAPI+ dermal cell desnity after chUVB per area mm2 (Figure I)
																				Upper dermis						Lower dermis
		Upper dermis						Lower dermis											Control	1622.37	2227.26	2425.62	2464.74	3499.78		2563.12	2993.49	3223.69	3048.81	4719.5
	Control	1145.57	1249.83	1292.59	1238.27	1482.62		1552.2	1549.7	1658.99	1598.49	1807.18							chUVR PI3	1334.49	1652.31	2046.66	2814.1	3886.9	2704.25	2246.91	2595.97	2789.83	3788.86	3238.36	3772.47
	chUVR PI3	460.168	759.504	878.092	562.821	881.03	738.277	1564.55	1305.04	1342.33	1111.17	1150.33	1343.59						chUVR PI7	2332.51	1790.27	2223.79	2236.91	2237.29		2659.49	2048.67	2737.04	2890	2763.87
	chUVR PI7	930.649	497.657	451.323	504.858	799.031		1222.26	1104.59	1166.42	1323.11	1283.14							chrUVR PI10	1687.3	2078.51	1784	2560.2	2239.55		2521.3	2966.82	2634.43	3156.95	3370.39
	chrUVR PI10	596.668	926.467	605.401	941.878	948.7		1235	1510.45	1219.42	1412.66	1727.58							chrUVR PI14	2222.9	1711.86	2602.46	2214.33	2085.27		4293.31	2869.52	3330.78	3316.22	3285.37
	chrUVR PI14	795.35	515.305	684.696	695.855	761.666		1945.02	1268.1	1436.52	1392.39	1384.92							chrUVR PI 30	1886.08	1617.37	1409.17	1815.08	2281.02		3306.4	2339.41	1876.87	3184.8	3552.28
	chrUVR PI 30	865.3	343.789	483.067	835.161	963.615		1462.65	1013.2	965.102	1492.66	1709.44
																						PDGFR H2B cells		SD: 3, 100, filter 20								PDGFR H2B cells		SD: 3, 100, filter 20								PDGFR H2B cells		SD: 3, 100, filter 20
																						DAPI		SD: 3, 200, filter 20								DAPI		SD: 3, 200, filter 20								DAPI		SD: 3, 200, filter 20
	PDGFR H2B cells		SD: 3, 100, filter 20									PDGFR H2B cells		SD: 3, 100, filter 20																		yH2Ax		SD:4, 100, filter 20
	DAPI		SD: 3, 200, filter 20									DAPI		SD: 3, 200, filter 20
	Control											UVB treated mice PI 3days										UVB treated mice PI 7days										UVB treated mice PI 10 days										UVB treated mice PI 14 days
	Sample		area	PDGFR+	DAPI	PDGFRper area in mm2	DAPI per area in mm2					Sample		area	PDGFR+	DAPI	PDGFRper area in mm2	DAPI per area in mm2				Sample		area	PDGFR+	yH2Ax+	yH2Ax+ PDGFR+	DAPI	PDGFRper area in mm2	DAPI per area in mm2		Sample		area	PDGFR+	yH2Ax+	yH2Ax+ PDGFR+	DAPI	PDGFRper area in mm2	DAPI per area in mm2		Sample		area	PDGFR+	DAPI	PDGFRper area in mm2	DAPI per area in mm2
	chUVByH2AX CD31 Con1 20x1	upper	75495	86	121							chUV P3d 1 YAP Itga6 20x1	upper	144506	80	121						chUVB PI 7d yH2AX CD31 1 BSO 20x1	upper	80830	61	22	0	160				chUVB PI10d yH2AX CD31 A1 20x1	upper	118774	81	35	3	219				chUVB PI2wks 1BSL GFP DAPI 20x1	upper	66766	67	158	1003.5	2366.47
		lower	143376	208	362								lower	298487	415	587							lower	144208	159	52	2	316					lower	281550	343	104	8	710					lower	203988	389	775	1906.97	3799.24
	chUVB yH2AX CD31 Con1 20x2	upper	85997	99	141							chUV P3d 1 YAP Itga6 20x2	upper	103435	47	164						chUVB PI 7d yH2AX CD31 1 BSO 20x1	upper	88944	97	37	3	236				chUVB PI10d yH2AX CD31 A1 20x2	upper	85695	41	25	4	126				chUVB PI2wks 1BSL GFP DAPI 20x2	upper	60376	55	157	910.958	2600.37
		lower	107880	182	282								lower	214487	368	509							lower	181418	239	89	7	550					lower	244765	307	90	9	617					lower	223422	325	782	1454.65	3500.1
	Sum	upper	161492	185	262	1145.57	1622.37					chUV P3d 1 YAP Itga6 20x3	upper	99758	33	179						Sum	upper	169774	158	59	3	396	930.649	2332.51		Sum	upper	204469	122	60	7	345	596.667	1687.3		chUVB PI2wks 1BSL GFP DAPI 20x3	upper	63777	54	129	846.7	2022.67
		lower	251256	390	644	1552.2	2563.12						lower	222702	368	557							lower	325626	398	141	9	866	1222.26	2659.49			lower	526315	650	194	17	1327	1235	2521.3			lower	16907	282	591	16679.5	34955.9
	chUVB yH2AX CD31 Con2 20x1	upper	66201	84	136							Sum	upper	347699	160	464	460.168	1334.49				chUVB PI7d yH2AX CD31 1BSU 20x1	upper	84028	46	13	1	142				chUVB PI10d yH2AX CD31 A2 20x1	upper	79975	67	24	3	165				Sum	upper	127142	122	315	959.557	2477.54
		lower	184989	279	574								lower	735676	1151	1653	1564.55	2246.91					lower	214508	269	112	9	475					lower	160100	200	47	2	447					lower	427410	714	1557	1670.53	3642.87
	chUVB yH2AX CD31 Con2 20x2	upper	58616	72	142																	chUVB PI7d yH2AX CD31 1BSU 20x2	upper	70697	31	15	2	135				chUVB PI10d yH2AX CD31 A2 20x2	upper	90404	77	31	6	180
		lower	173789	277	500																		lower	258970	254	70	4	495					lower	169146	266	79	10	517				Sample		area	PDGFR+	DAPI	PDGFRper area in mm2	DAPI per area in mm2
	Sum	upper	124817	156	278	1249.83	2227.26															Sum	upper	154725	77	28	3	277	497.657	1790.27		chUVB PI10d yH2AX CD31 A2 20x3	upper	77876	86	20	2	171				chUVB PI2wks 1BSU GFP DAPI 20x2	upper	76395	52	168	680.673	2199.1
		lower	358778	556	1074	1549.7	2993.49					Sample		area	PDGFR+	DAPI	PDGFRper area in mm2	DAPI per area in mm2					lower	473478	523	182	13	970	1104.59	2048.67			lower	207019	344	91	9	627					lower	251086	428	1000	1704.6	3982.7
	chUVB yH2AX CD31 Con3 20x1	upper	63204	88	168							chUV P3d 2 YAP Itga6 20x1	upper	111171	79	148						chUVB PI7d yH2AX CD31 2BSO 20x1	upper	62545	29	18	6	136				Sum	upper	248255	230	75	11	516	926.467	2078.51		chUVB PI2wks 1BSU GFP DAPI 20x3	upper	75931	45	151	592.643	1988.65
		lower	200088	347	687								lower	230359	286	492							lower	222441	265	141	11	560					lower	536265	810	217	21	1591	1510.45	2966.82			lower	229524	375	823	1633.82	3585.68
	chUVB yH2AX CD31 Con3 20x2	upper	62125	74	136							chUV P3d 2 YAP Itga6 20x2	upper	99782	91	186						chUVB PI7d yH2AX CD31 2BSO 20x2	upper	59319	26	12	0	135				chUVB PI10d yH2AX CD31 B1 20x1	upper	78932	42	9	1	111				Sum	upper	152326	97	319	636.792	2094.19
		lower	192320	304	578								lower	174604	251	489							lower	210509	240	122	2	625					lower	196635	236	67	12	492					lower	480610	803	1823	1670.79	3793.1
	Sum	upper	125329	162	304	1292.6	2425.62					chUV P3d 2 YAP Itga6 20x3	upper	111626	75	199						Sum	upper	121864	55	30	6	271	451.323	2223.79		chUVB PI10d yH2AX CD31 B1 20x2	upper	76337	52	31	3	166				Sum	upper	343245	273	763	795.35	2222.9
		lower	392408	651	1265	1658.99	3223.69						lower	232564	295	674							lower	432950	505	263	13	1185	1166.42	2737.04			lower	217496	269	85	12	599					lower	924927	1799	3971	1945.02	4293.31
	chUVB control 1 GFP YAP Itga6 20x1	upper	57720	79	216							Sum	upper	322579	245	533	759.504	1652.31				chUVB PI7d yH2AX CD31 2BSU 20x1	upper	67985	36	15	0	165				Sum	upper	155269	94	40	4	277	605.401	1784
		lower	124349	210	589								lower	637527	832	1655	1305.04	2595.97					lower	223970	314	116	4	633					lower	414131	505	152	24	1091	1219.42	2634.43
	chUVB control 1 GFP YAP Itga6 20x2	upper	41429	68	131																	chUVB PI7d yH2AX CD31 2BSU 20x2	upper	60764	29	28	3	123				chUVB PI10d yH2AX CD31 C1 20x1	upper	58204	52	15	0	139				Sample		area	PDGFR+	DAPI	PDGFRper area in mm2	DAPI per area in mm2
		lower	96437	189	453							Sample		area	PDGFR+	DAPI	PDGFRper area in mm2	DAPI per area in mm2					lower	227241	283	177	3	671					lower	223674	292	69	3	684				chUVB PI2wks 2 BSL GFP DAPI 20x1	upper	63074	30	91	475.632	1442.75
	Sum	upper	99149	147	347	1482.62	3499.78					chUV P3d 3 YAP Itga6 20x1	upper	112127	118	290						Sum	upper	128749	65	43	3	288	504.858	2236.91		chUVB PI10d yH2AX CD31 C1 20x2	upper	58584	58	13	3	160					lower	155057	184	407	1186.66	2624.84
		lower	220786	399	1042	1807.18	4719.5						lower	288134	405	956							lower	451211	597	293	7	1304	1323.11	2890			lower	240699	364	73	5	782				chUVB PI2wks 2 BSL GFP DAPI 20x2	upper	66775	28	110	419.319	1647.32
												chUV P3d 3 YAP Itga6 20x2	upper	101444	83	192						chUVB PI7d yH2AX CD31 3BSO 20x1	upper	58162	46	25	3	137				Sum	upper	116788	110	28	3	299	941.878	2560.19			lower	196313	248	578	1263.29	2944.28
													lower	205702	290	560							lower	197422	271	128	7	586					lower	464373	656	142	8	1466	1412.66	3156.94		chUVB PI2wks 2 BSL GFP DAPI 20x3	upper	64621	31	118	479.72	1826.03
												chUV P3d 3 YAP Itga6 20x3	upper	85942	62	131						chUVB PI7d yH2AX CD31 3BSO 20x2	upper	60732	49	13	2	129				chUVB PI10d yH2AX CD31 C2 20x1	upper	68752	62	23	3	146					lower	191082	270	592	1413.01	3098.15
													lower	304778	377	712							lower	242903	294	113	4	631					lower	249094	415	84	8	823				Sum	upper	129849	58	201	446.673	1547.95
												Sum	upper	299513	263	613	878.092	2046.66				Sum	upper	118894	95	38	5	266	799.031	2237.29		chUVB PI10d yH2AX CD31 C2 20x2	upper	59845	60	22	3	142					lower	351370	432	985	1229.47	2803.31
													lower	798614	1072	2228	1342.33	2789.83					lower	440325	565	241	11	1217	1283.14	2763.87			lower	187354	339	76	11	648
																																Sum	upper	128597	122	45	6	288	948.7	2239.55
																																	lower	436448	754	160	19	1471	1727.58	3370.39		Sample		area	PDGFR+	DAPI	PDGFRper area in mm2	DAPI per area in mm2
												Sample		area	PDGFR+	DAPI	PDGFRper area in mm2	DAPI per area in mm2																								chUVB PI2wks 2 BSU GFP DAPI 20x1	upper	62450	36	106	576.461	1697.36
												chUVB PI3d 4 GFP YAP Itga6 20x1	upper	76005	41	199																											lower	191023	232	516	1214.51	2701.25
													lower	189772	223	690																										chUVB PI2wks 2 BSU GFP DAPI 20x2	upper	86566	52	163	600.698	1882.96
												chUVB PI3d 4 GFP YAP Itga6 20x2	upper	51922	31	161																											lower	217555	272	636	1250.26	2923.4
													lower	159410	165	633																										Sum	upper	149016	88	269	590.541	1805.18
												Sum	upper	127927	72	360	562.821	2814.1																									lower	408578	504	1152	1233.55	2819.54
													lower	349182	388	1323	1111.17	3788.86																								Sum	upper	343486	177	588	515.305	1711.86
												chUVB PI3d 5 GFP YAP Itga6 20x1	upper	2075	38	127																											lower	951030	1206	2729	1268.1	2869.52
													lower	242531	260	730
												chUVB PI3d 5 GFP YAP Itga6 20x2	upper	94403	47	248
													lower	227769	281	793																										Sample		area	PDGFR+	DAPI	PDGFRper area in mm2	DAPI per area in mm2
												Sum	upper	96478	85	375	881.03	3886.9																								chUVB PI2wks 3BSL GFP DAPI 20x1	upper	62711	30	163	478.385	2599.23
													lower	470300	541	1523	1150.33	3238.36																									lower	156122	221	526	1415.56	3369.16
												chUVB PI3d 6 GFP YAP Itga6 20x1	upper	58010	59	183																										chUVB PI2wks 3 BSL GFP DAPI 20x2	upper	66810	32	185	478.97	2769.05
													lower	233796	343	954																											lower	176669	259	587	1466.02	3322.6
												chUVB PI3d 6 GFP YAP Itga6 20x2	upper	62541	30	143																										chUVB PI2wks 3 BSL GFP DAPI 20x3	upper	72390	39	185	538.748	2555.6
													lower	323664	406	1149																											lower	207675	299	873	1439.75	4203.68
												Sum	upper	120551	89	326	738.277	2704.25																								Sum	upper	129521	62	348	478.687	2686.82
													lower	557460	749	2103	1343.59	3772.47																									lower	332791	480	1113	1442.35	3344.44
																																										Sample		area	PDGFR+	DAPI	PDGFRper area in mm2	DAPI per area in mm2
																																										chUVB PI2wks 3 BSU GFP DAPI 20x1	upper	77880	78	202	1001.54	2593.73
																																											lower	195867	287	519	1465.28	2649.76
																																										chUVB PI2wks 3 BSU GFP DAPI 20x2	upper	42980	42	105	977.199	2443
																																											lower	148446	205	442	1380.97	2977.51
																																										Sum	upper	120860	120	307	992.884	2540.13
																																											lower	344313	492	961	1428.93	2791.07
																																										Sum	upper	322771	221	840	684.696	2602.46
																																											lower	884779	1271	2947	1436.52	3330.78
																																										Sample		area	PDGFR+	DAPI	PDGFRper area in mm2	DAPI per area in mm2
																																										chUVB PI2wks 4 BSL GFP DAPI 20x1	upper	82466	41	211	497.175	2558.63
																																											lower	220848	333	799	1507.82	3617.87
																																										chUVB PI2wks 4 BSL GFP DAPI 20x2	upper	72889	61	163	836.889	2236.28
																																											lower	243908	359	854	1471.87	3501.32
																																										Sum	upper	155355	102	374	656.561	2407.39
																																											lower	464756	692	1653	1488.95	3556.71
																																										Sample		area	PDGFR+	DAPI	PDGFRper area in mm2	DAPI per area in mm2
																																										chUVB PI2wks 4 BSU GFP DAPI 20x1	upper	82061	51	151	621.489	1840.09
																																											lower	203936	236	622	1157.23	3049.98
																																										chUVB PI2wks 4 BSU GFP DAPI 20x2	upper	70612	56	147	793.066	2081.8
																																											lower	177250	234	568	1320.17	3204.51
																																										chUVB PI2wks 4 BSU GFP DAPI 20x3	upper	62739	49	149	781.013	2374.92
																																											lower	149469	224	458	1498.64	3064.18
																																										Sum	upper	152673	107	298	700.844	1951.88
																																											lower	381186	470	1190	1232.99	3121.84
																																										Sum	upper	370767	258	821	695.855	2214.33
																																											lower	995411	1386	3301	1392.39	3316.22
																																										Sample		area	PDGFR+	DAPI	PDGFRper area in mm2	DAPI per area in mm2
																																										chUVB PI2wks wound sample GFP DAPI 20x1	upper	68707	70	170	1018.82	2474.27
																																											lower	136305	188	473	1379.26	3470.16
																																										chUVB PI2wks wound sample GFP DAPI 20x2	upper	62151	53	146	852.762	2349.12
																																											lower	165232	205	515	1240.68	3116.83
																																										Sum	upper	130858	123	316	939.95	2414.83
																																											lower	301537	393	988	1303.32	3276.55
																																										Sample		area	PDGFR+	DAPI	PDGFRper area in mm2	DAPI per area in mm2
																																										chUVB PI2wks wound sample GFP DAPI 20x1	upper	65827	48	146	729.184	2217.93
																																											lower	173960	267	610	1534.84	3506.55
																																										chUVB PI2wks wound sample GFP DAPI 20x2	upper	98720	54	154	547.002	1559.97
																																											lower	180137	248	556	1376.73	3086.54
																																										Sum	upper	164547	102	300	619.884	1823.19
																																											lower	354097	515	1166	1454.4	3292.88
																																										Sum	upper	295405	225	616	761.666	2085.27
																																											lower	655634	908	2154	1384.92	3285.37
