# Supplementary material for: Role of distinct fibroblast lineages and immune cells in dermal repair following UV radiation-induced tissue damage
Source: eLife journal article supplement (doi:10.7554/elife.71052), 2021-12-23
Supplement: supp [file elife-71052-supp-v1.zip › elife_poa_e71052_Figure_3_figure_supplement_1_source_data_1.xlsx]

## Sheet: Figure S3B
	Average cell size after acUVB single measurments (um)
	Control	acUVR
	23.0454	23.9029
	13.3554	25.5235
	16.5528	12.0491
	18.0296	28.1294
	17.9893	23.9053
	14.885	23.2543
	15.7623	26.8888
	18.8846	16.1225
	17.9856	26.1144
	17.962	27.2794
	30.1035	26.4325
	22.5624	20.5071
	16.6644	23.7789
	14.8657	26.8683
	18.5454	19.1146
	13.2215	18.1753
	14.5923	22.873
	19.3688	16.939
	13.6983	15.5353
	24.7808	10.961
	11.651	36.6612
	18.1796	27.634
	15.8515	28.4605
	14.823	22.7267
	20.5456	18.6794
	15.7127	13.6536
	20.3397	40.8964
	14.428	20.6534
	10.8816	19.5195
	9.00364	24.2135
	28.3985	14.7982
	15.8509	17.1008
	16.9068	17.8548
	26.8175	18.4512
	27.6911	17.8969
	10.1017	19.6962
	7.30422	9.06998
	19.7848	20.0551
	28.0401	22.7652
	16.435	31.2641
	10.0601
	12.8247
	16.7499	24.2811
	16.3804	15.8131
	19.4215	14.2557
	18.5721	16.6383
	15.0778	13.4621
	16.0543	9.62798
	15.9433	22.0726
	18.3464	12.0478
		23.48
		9.64286
	16.5007	16.9632
	18.078	7.8926
	17.1002	12.5624
	21.9263	14.5898
	17.5193	15.1193
	13.7008	10.4117
	10.9455	13.6016
	31.0397	11.7602
	15.2253	13.4583
	20.7626	9.80344
	15.3946	9.83072
	18.9708	9.8084
	30.9101	11.1916
	24.6524	6.63834
	16.9043	10.1041
	21.0955	6.29796
	17.6743	10.8984
	19.7966	14.1614
	25.4702	11.5841
	19.897	11.7583
	16.0258	7.37738
	18.0439	15.5031
	13.1731	11.4564
	21.7874	12.121
	26.9402	16.2725
	16.0059	8.22306
	16.8349	9.2907
	16.27	17.094
	15.6897	16.1305
	10.9895	17.236
	17.316	11.7403
	20.4259	12.1185
	15.3016	20.8345
	18.4196	19.6714
	11.279	14.2544
	11.3733	13.255
	10.3187	10.669
	24.1602	13.1831
	19.0551	14.5991
	17.4933	16.2849
	13.7572	13.4639
	20.3937	12.7869
	11.8073	12.1334
	21.7577	6.83922
	23.3511	12.7825
	19.1921	11.9294
	15.7226	18.246
	24.1645	17.7773
	20.4085
	17.6136
	19.0737	15.8912
	16.0096	13.6536
	23.6325	16.0636
	16.3711	16.2434
	10.4842	14.3536
	15.7468	19.357
	10.2833	18.4524
	22.0559	14.6128
	21.9666	10.2021
	16.3091	14.596
	13.6741	16.9539
		15.6655
		13.8179
	21.5748	18.8722
	11.023	11.4365
	15.1261	16.3289
	11.2691	16.0555
	12.953	23.79
	11.4316	9.7123
	15.2359	17.365
	15.9538	10.4755
	20.1643	19.4537
	20.3168	11.6907
	15.092	15.4696
	16.1194	20.1004
	15.1987	15.9346
	19.8313	11.2307
	17.5243	12.8948
	14.9172	14.4658
	10.0936	15.0865
	20.0359	9.73648
	17.4356	18.0525
	17.4077	18.5895
	12.0156	12.0348
	13.2376	17.3829
	15.2836	32.9276
	11.5636	20.6045
	17.1232	17.7029
	22.8024	18.2844
	13.4949	27.306
	25.239	18.7761
	21.1594	24.0882
	21.4911	36.2018
	27.2137	32.6374
	23.9655	19.1264
	20.3087	18.6825
	13.4503	26.3475
	15.6407	25.0871
	12.8929	19.1859
	13.7733	22.7745
	10.9157	20.6634
	20.0353	10.6863
	11.217	16.2818
	16.7078	26.1132
	28.6514	26.1398
	15.898	14.7293
	28.5225	29.7538
	18.7283	14.211
	20.0942	25.2619
	28.037	19.9045
	18.7618	19.2169
	19.8704
		20.9603
		20.7074
	21.9344	26.4653
	16.076	21.0124
	18.959	16.3054
	17.3991	26.6637
	14.9507	16.1715
	12.7546	25.8497
	20.0744	18.8703
	29.2274	13.1012
	18.0451	18.6843
	22.2003	30.1264
	23.8576	15.2842
	14.7337	14.4838
	25.0406	9.2721
	10.6783	13.4664
	12.5587	14.6072
	20.1196	10.8568
	14.0343	16.1057
	19.3744	12.6579
	15.4051	16.988
	22.9977	15.4287
	23.0801	20.5691
	19.0284	15.6017
	17.6396	16.6055
	23.201	17.7673
	19.406	16.5205
	18.254	19.9063
	14.3908	28.3204
	13.2624	15.8193
	8.08294	25.0201
	8.37434	19.0011
	16.8274	11.0168
	15.766	18.1431
	19.1413
	19.9311	26.5286
	11.24	12.281
	9.48476	18.3464
	9.0458
	17.7723
	21.8569	14.358
	18.6453	30.7384
	13.6425	19.7408
	20.4017	23.1768
	16.0741	17.9366
	17.8926	16.518
	20.4842	13.6952
	22.1228	13.976
	17.8504	20.2486
	15.9966	23.5408
	9.51328	17.5993
	12.4868	11.0056
	18.7897	12.4397
	13.6332	11.1185
	30.8103	13.4695
	7.99738	16.7022
	15.6296	17.843
	23.1638	11.9003
	21.5785	13.0144
	12.418	9.72966
	16.0933	32.0193
	21.6566	12.8148
	22.5091	18.711
	15.1069	14.2736
	22.2568	9.80654
	18.91	17.4518
	10.6714	20.1401
	8.246	8.98876
	10.7663	9.331
	8.69674	24.0957
	19.7582	16.7245
	18.7457	34.0417
	23.8632	27.9409
	17.6099	16.3395
	25.2681	15.3735
	16.0444	29.5659
	21.1215	30.8754
	16.7636	16.0667
	15.81	30.9547
	23.1093	20.8618
	16.3376	13.8316
	11.5773	19.5722
	16.1758	27.3067
	10.9715	26.7307
	18.2268	21.0471
	20.2951	10.2312
	26.7022	11.9176
	14.588	16.7598
	23.9171	17.5882
	17.9688	12.449
	10.5363	30.1444
	15.7145	19.2219
	27.3098	12.5525
	17.7035	26.3202
	25.3189	21.0943
	22.8557	24.5061
	11.961	19.3638
	19.238	17.9199
	15.575	19.0247
	21.6064	12.0826
	15.779	23.4261
	13.7814	27.5323
	17.763	14.973
	14.712	21.9437
	12.1768	16.7636
	12.1018	23.2636
	10.2771	31.1996
	14.1558	13.2364
	12.1898	20.3186
	13.3697	17.0816
	16.1026	18.3656
	15.9873	23.0566
	9.2845	25.136
	26.4039	21.1922
	16.1584	17.6892
	18.0209	24.1812
	18.5293	22.6418
	29.238	12.1123
	25.4219	18.1759
	10.5226	20.1574
	17.7574	20.0068
	9.45686	24.5322
	15.4957	19.1896
	7.12628	12.0832
	11.1631	30.8183
	19.4525	30.4451
	14.1974	27.4877
	12.7075	21.1408
	10.6435	19.8859
	13.0975
	10.2455
	15.0958
	17.112
	12.369
	10.9591
	21.6132
	11.5785
	18.0408
	17.5572
	14.9519
	14.1255
	16.572
	20.5803
	22.8582
	17.3885
	18.1511
	12.9338
	18.4326
	16.8603
	15.7988
	17.1101
	11.5097
	20.8047
	22.3553
	22.5971
	23.0807
	24.5929
	18.3756
	20.2653
	16.0704
	28.9732
	15.3177
	18.3359
	15.8701
	30.8047
	8.14556
	22.6306
	27.8833
	17.1132
	16.9155
	18.4183
	15.4188
	23.2829
	19.9349
	14.2451
	16.5986
	19.5827
	31.3466
	24.2259
	21.1463
	17.9794
	17.347
	18.9081
	14.8013
	24.2594
	28.1933
	14.508
	21.9598
	16.8882

## Sheet: Figure S3C
	Average cell size after acUVB (um)
	Control	acUVR
Mouse 1	17.7953	16.831
Mouse 1	17.2736	18.3085
Mouse 1	17.7629	19.47
	Control 1	Control 2	Control 3	acUVR1	acUVR2	acUVR3
	23.0454	21.5748	23.8632	23.9029	15.8912	14.358
	13.3554	11.023	17.6099	25.5235	13.6536	30.7384
	16.5528	15.1261	25.2681	12.0491	16.0636	19.7408
	18.0296	11.2691	16.0444	28.1294	16.2434	23.1768
	17.9893	12.953	21.1215	23.9053	14.3536	17.9366
	14.885	11.4316	16.7636	23.2543	19.357	16.518
	15.7623	15.2359	15.81	26.8888	18.4524	13.6952
	18.8846	15.9538	23.1093	16.1225	14.6128	13.976
	17.9856	20.1643	16.3376	26.1144	10.2021	20.2486
	17.962	20.3168	11.5773	27.2794	14.596	23.5408
	30.1035	15.092	16.1758	26.4325	16.9539	17.5993
	22.5624	16.1194	10.9715	20.5071	15.6655	11.0056
	16.6644	15.1987	18.2268	23.7789	13.8179	12.4397
	14.8657	19.8313	20.2951	26.8683	18.8722	11.1185
	18.5454	17.5243	26.7022	19.1146	11.4365	13.4695
	13.2215	14.9172	14.588	18.1753	16.3289	16.7022
	14.5923	10.0936	23.9171	22.873	16.0555	17.843
	19.3688	20.0359	17.9688	16.939	23.79	11.9003
	13.6983	17.4356	10.5363	15.5353	9.7123	13.0144
	24.7808	17.4077	15.7145	10.961	17.365	9.72966
	11.651	12.0156	27.3098	36.6612	10.4755	32.0193
	18.1796	13.2376	17.7035	27.634	19.4537	12.8148
	15.8515	15.2836	25.3189	28.4605	11.6907	18.711
	14.823	11.5636	22.8557	22.7267	15.4696	14.2736
	20.5456	17.1232	11.961	18.6794	20.1004	9.80654
	15.7127	22.8024	19.238	13.6536	15.9346	17.4518
	20.3397	13.4949	15.575	40.8964	11.2307	20.1401
	14.428	25.239	21.6064	20.6534	12.8948	8.98876
	10.8816	21.1594	15.779	19.5195	14.4658	9.331
	9.00364	21.4911	13.7814	24.2135	15.0865	24.0957
	28.3985	27.2137	17.763	14.7982	9.73648	16.7245
	15.8509	23.9655	14.712	17.1008	18.0525	34.0417
	16.9068	20.3087	12.1768	17.8548	18.5895
	26.8175	13.4503	12.1018	18.4512	12.0348
	27.6911	15.6407	10.2771	17.8969	17.3829	27.9409
	10.1017	12.8929	14.1558	19.6962	32.9276	16.3395
	7.30422	13.7733	12.1898	9.06998	20.6045	15.3735
	19.7848	10.9157	13.3697	20.0551	17.7029	29.5659
	28.0401	20.0353	16.1026	22.7652	18.2844	30.8754
	16.435	11.217	15.9873	31.2641	27.306	16.0667
	10.0601	16.7078	9.2845		18.7761	30.9547
	12.8247	28.6514	26.4039		24.0882	20.8618
	16.7499	15.898	16.1584	24.2811	36.2018	13.8316
	16.3804	28.5225	18.0209	15.8131	32.6374	19.5722
	19.4215	18.7283	18.5293	14.2557	19.1264	27.3067
	18.5721	20.0942	29.238	16.6383	18.6825	26.7307
	15.0778	28.037	25.4219	13.4621	26.3475	21.0471
	16.0543	18.7618	10.5226	9.62798	25.0871	10.2312
	15.9433	19.8704	17.7574	22.0726	19.1859	11.9176
	18.3464		9.45686	12.0478	22.7745	16.7598
			15.4957	23.48	20.6634	17.5882
			7.12628	9.64286	10.6863	12.449
	16.5007	21.9344	11.1631	16.9632	16.2818	30.1444
	18.078	16.076	19.4525	7.8926	26.1132	19.2219
	17.1002	18.959	14.1974	12.5624	26.1398	12.5525
	21.9263	17.3991	12.7075	14.5898	14.7293	26.3202
	17.5193	14.9507	10.6435	15.1193	29.7538	21.0943
	13.7008	12.7546		10.4117	14.211	24.5061
	10.9455	20.0744		13.6016	25.2619	19.3638
	31.0397	29.2274	13.0975	11.7602	19.9045	17.9199
	15.2253	18.0451	10.2455	13.4583	19.2169	19.0247
	20.7626	22.2003	15.0958	9.80344		12.0826
	15.3946	23.8576	17.112	9.83072		23.4261
	18.9708	14.7337	12.369	9.8084	20.9603	27.5323
	30.9101	25.0406	10.9591	11.1916	20.7074	14.973
	24.6524	10.6783	21.6132	6.63834	26.4653	21.9437
	16.9043	12.5587	11.5785	10.1041	21.0124	16.7636
	21.0955	20.1196	18.0408	6.29796	16.3054	23.2636
	17.6743	14.0343	17.5572	10.8984	26.6637	31.1996
	19.7966	19.3744	14.9519	14.1614	16.1715	13.2364
	25.4702	15.4051	14.1255	11.5841	25.8497	20.3186
	19.897	22.9977	16.572	11.7583	18.8703	17.0816
	16.0258	23.0801	20.5803	7.37738	13.1012	18.3656
	18.0439	19.0284	22.8582	15.5031	18.6843	23.0566
	13.1731	17.6396	17.3885	11.4564	30.1264	25.136
	21.7874	23.201	18.1511	12.121	15.2842	21.1922
	26.9402	19.406	12.9338	16.2725	14.4838	17.6892
	16.0059	18.254	18.4326	8.22306	9.2721	24.1812
	16.8349	14.3908	16.8603	9.2907	13.4664	22.6418
	16.27	13.2624	15.7988	17.094	14.6072	12.1123
	15.6897	8.08294	17.1101	16.1305	10.8568	18.1759
	10.9895	8.37434	11.5097	17.236	16.1057	20.1574
	17.316	16.8274	20.8047	11.7403	12.6579	20.0068
	20.4259	15.766	22.3553	12.1185	16.988	24.5322
	15.3016	19.1413	22.5971	20.8345	15.4287	19.1896
	18.4196	19.9311	23.0807	19.6714	20.5691	12.0832
	11.279	11.24	24.5929	14.2544	15.6017	30.8183
	11.3733	9.48476	18.3756	13.255	16.6055	30.4451
	10.3187	9.0458	20.2653	10.669	17.7673	27.4877
	24.1602	17.7723	16.0704	13.1831	16.5205	21.1408
	19.0551	21.8569	28.9732	14.5991	19.9063	19.8859
	17.4933	18.6453	15.3177	16.2849	28.3204
	13.7572	13.6425	18.3359	13.4639	15.8193
	20.3937	20.4017	15.8701	12.7869	25.0201
	11.8073	16.0741	30.8047	12.1334	19.0011
	21.7577	17.8926	8.14556	6.83922	11.0168
	23.3511	20.4842	22.6306	12.7825	18.1431
	19.1921	22.1228	27.8833	11.9294
	15.7226	17.8504	17.1132	18.246	26.5286
	24.1645	15.9966	16.9155	17.7773	12.281
	20.4085	9.51328	18.4183		18.3464
	17.6136	12.4868	15.4188
	19.0737	18.7897	23.2829
	16.0096	13.6332	19.9349
	23.6325	30.8103	14.2451
	16.3711	7.99738	16.5986
	10.4842	15.6296	19.5827
	15.7468	23.1638	31.3466
	10.2833	21.5785	24.2259
	22.0559	12.418	21.1463
	21.9666	16.0933	17.9794
	16.3091	21.6566	17.347
	13.6741	22.5091	18.9081
		15.1069	14.8013
		22.2568	24.2594
		18.91	28.1933
		10.6714	14.508
		8.246	21.9598
		10.7663	16.8882
		8.69674
		19.7582
		18.7457
Average	17.7953	17.2736	17.7629	16.831	18.3085	19.47

## Sheet: Figure S3D
	Average cell size after chUVB (um)
	Control	chUVR
Mouse 1	20.0798	34.4291
Mouse 2	23.6382	28.6754
Mouse 3	22.7674	33.6896
Mouse 4	21.6594	33.94
Mouse 5		39.4875
Mouse 6		37.4826
	Control 1	Control 2	Control 3	Control 4	chUVR1	chUVR2_2	chUVR3	chUVR4	chUVR5	chUVR6
	23.2278	35.1351	41.7027	22.969	30.8113	48.5541	33.5257	46.2124	43.3342	53.2103
	16.6485	36.6613	39.1332	25.6217	38.1251	29.5777	21.9765	37.8021	32.8907	51.1076
	14.2643	31.094	35.7214	28.5201	26.1833	19.907	34.6307	36.6691	35.2632	23.6256
	11.9275	25.2661	21.2043	32.7691	52.0949	46.5527	49.0808	27.5333	34.5403	30.4031
	22.7539	28.7605	46.0297	29.6517	37.5226	23.511	27.3117	31.7642	33.6843	29.1363
	19.2556	14.4202	29.5081	25.0536	27.4274	20.8463	29.2364	25.7757	66.118	38.5502
	30.4031	36.3454	23.6093	37.3561	36.7334	39.2615	23.7081	27.9838	53.9968	47.4455
	19.1457	24.8917	16.0745	28.7878	51.5222	37.5156	26.5284	33.7655	29.2831	42.6771
	20.9215	27.0556	21.8946	33.6407	40.482	33.2035	25.5814	23.077	27.8596	25.9584
	19.6644	18.6134	17.1847	15.4213	30.955	28.4109	27.8596	34.8348	27.0537	29.5458
	20.2741	30.5949	33.3366	24.3705	43.2062	40.1834	38.0881	32.7704	38.7192	39.6298
	18.4548	29.6562	25.5879	26.702	22.1643	34.5718	46.4997	37.6915	31.7278	41.6663
	12.3884	34.5767	23.2304	26.8762	18.5536	42.669	31.4431	30.6462	75.9785	39.2191
	33.5621	22.007	21.3336	22.7507	57.3326	29.3037	33.9813	46.0129	43.8535	36.6138
	19.3654	22.0636	21.5683	31.2962	40.8389	20.4699	20.8942	28.4368	36.3675	44.5998
	23.9623	18.6335	15.3712	11.9957	46.7786	26.647	25.2096	57.1753	27.4703	37.6792
	22.7533	25.6795	30.4376	22.4295	40.4203	25.3791	22.9619	25.2551	35.5953	40.2968
	18.2468	20.9508	21.9577	22.2053	28.0462	34.0213	22.1104	20.6882	25.961	39.5219
	23.4032	18.5185	17.1554	34.4858	24.5811	43.1873	29.8526	26.5415	35.0187	44.9027
	26.1515	21.6749	17.2393	15.2951	30.8958	18.6205	28.6292	43.9361	60.4864	45.8536
	26.7891	28.5467	10.5716	25.8453	27.9435	25.5893	19.2315	28.4843	48.9132	45.2972
	18.1629	16.0667	23.3655	22.1994	28.1125	22.6275	16.9013	36.1439	68.8545	43.8971
	18.2429	15.0534	25.166	21.1477	20.8949	23.4775	23.5313	34.6392	38.5099	35.0448
	10.6021	18.6271	26.7527	11.5538	31.6726	42.2635	24.0871	30.7742	26.4329	42.8727
	25.5873	14.8252	16.0784	8.5215	35.2625	24.4751	34.3025	31.3788	35.0889	28.8275
	17.238	11.9542	24.7188	17.2094	27.3656	27.2719	40.1837	42.3462	32.7873	26.6208
	20.8884	27.8324	18.7272	21.513	30.0495	29.6986	34.7704	28.1392	48.7851	20.3678
	23.946	9.14355	15.4785	31.8792	29.4099	23.7807	42.7921	22.7831	45.3901	33.7642
	13.9906	17.2458	30.652	29.3117	39.145	23.1936	20.4958	32.9797	33.618	20.5992
	29.0914	12.2661	29.612	15.8476	47.4422	24.6791	19.7801	53.5087	43.5201	40.7654
	21.3174	19.8601	21.4591	17.2744	33.7376	22.8346	79.1375	37.4445	40.612	29.0654
	25.2999	18.317	12.6555	18.9716	37.5941	24.5117	32.3537	32.8543	42.0258	40.6744
	24.9256	10.1836	28.2054	16.5906	18.3177	45.6735	27.6594	36.827	32.7405	25.2219
	11.152	23.3708	12.8382	26.2067	31.9676	33.4955	36.2271	38.7166	43.2582	27.8785
	24.2391	19.8543	26.4173	12.4807	28.3231	21.0645	33.5673	24.4017	46.0609	21.8185
	40.2857	19.0411	23.294	17.7385	39.3126	21.9654	49.8342	34.8302	38.5866	29.3306
	28.8724	12.8122	19.1913	25.166	28.6163	20.8419	32.305	28.8132	41.9276	36.8485
	39.1846	18.2663	22.3743	17.7177	27.1752	24.0163	23.0841	40.9325	41.5636	41.3381
	20.2728	16.6283	29.5295	12.7582	23.7692	33.4459	31.8676	48.7838	43.9855	43.1489
	19.3472	24.8079	33.5433	10.595	36.4734	12.1433	34.8588	38.0906	34.71	44.0551
	23.7536	11.3438	20.1812	12.8979	35.891	27.8343	30.9017	33.1253	35.3626	48.7578
	27.8577	23.1874	28.3173	13.2178	49.827	39.6484	44.8623	30.3394	45.6099	39.2977
	21.3733	18.5939	26.9373	30.3921	47.9323	35.7002	40.6237	36.1036	33.8813	45.6801
	24.3243	14.8882	28.8457	19.8321	39.3036	24.9934	27.9279	42.0303	26.9744	53.2415
	18.761	28.9315	43.4772	20.2904	37.2346	27.4666	44.3787	18.3742	44.3306	48.1865
	19.0164	14.7738	27.2896	14.3884	33.3294	13.7262	28.1496	30.7684	50.9151	48.9944
	25.8544	13.8886	21.0808	18.6732	30.7053	10.2573	28.0117	34.7782	39.5486	35.163
	23.1387	17.7379	22.9639	13.2411	32.6579	12.723	28.9841	35.3782	29.6309	37.8391
	22.1299	25.7224	30.9927	24.5551	33.0018	41.9635	73.06	27.1083	40.6367	24.5856
	25.0042	25.0711	22.2684	17.7768	47.4975	32.6715	25.402	40.9363	48.956	38.9571
	17.8366	17.5325	25.1102	30.9836	28.5343	29.1654	61.9678	34.7146	52.9588	23.606
	24.0903	39.2711	15.9009	19.0853	35.672	38.1188	25.4001	27.0062	45.9297	26.364
	24.4335	22.4016	35.1409	20.3879	37.0442	29.0371	33.5972	25.3545	32.6619	36.2837
	31.8221	30.6989	42.0686	11.7624	31.3255	40.5765	16.4028	21.9856	28.6143	28.6546
	23.0952	20.3957	12.9597	14.7505	30.4954	24.6066	22.4595	28.953	33.0609	47.2687
	17.3102	26.1202	27.5282	23.0458	48.6434	20.2077	30.2451	38.0679	21.5923	32.8244
	21.2452	18.6595	17.4538	10.3811	41.3036	27.275	41.1164	31.5224	23.0022	52.0338
	24.9158	26.3412	21.1672	10.6867	33.0168	21.6882	37.4634	47.6457	44.1135	52.3731
	9.70515	11.7227	27.0413	30.1171	39.9906	16.5608	35.9457	36.0399	29.9877	26.5447
	40.6744	14.9818	23.3272	8.49875	24.4641	22.8073	50.8606	38.7238	24.7117	44.4528
	31.6764		17.7281	14.8298	35.4289	28.2949	60.1061		39.3705	27.9084
	37.3477		7.01805	18.8896	35.3665	26.4845	20.7727		59.1734	46.696
			13.7013	14.9214	41.5298	29.2807	24.2099		34.1198	29.6822
			29.2533	28.639	31.1025	33.3926	23.8426			38.0094
			12.7719	15.4161	50.8963	26.1398	26.6097			35.7428
			15.0592	24.8053	34.7334	28.8889	22.0623			23.467
			13.8346	15.8119	34.5898	18.4369	53.0757			41.4329
			18.434	20.9183	58.6358	20.9684	76.375			30.1704
			21.296	11.5498	25.5684	21.2121				31.4821
			15.6163	24.5147	28.6598	23.2134				44.6277
				23.7744	29.5399	42.3014				61.8579
				23.7315	39.0195	32.4403
				12.1362	13.351	33.3262
				14.1648	12.4871	29.4277
				16.3657	36.7458	31.6721
				27.7186	19.24	30.3918
				18.5998	26.9198	41.6745
				10.8498	30.1684	29.5827
				18.2026	40.7758	35.9687
				20.9274	49.5859	33.3126
				21.0164	28.2653	40.3564
				17.3375	54.1762	40.1723
				18.174	31.4723	24.9029
				15.9484	35.0759	34.2166
				23.5183	44.2293	22.9772
				15.5831	36.8901	21.5295
				27.3143	28.6689	25.9272
				13.533	15.9153	38.6793
				13.0968	34.6613	36.2421
				17.1607	23.6262	32.271
				20.6628	35.2612	20.7843
				14.298	30.3986	27.0952
				11.0818	37.7572	37.7636
				19.7912	15.4694	23.4416
				23.9194	20.4666	33.1409
				19.4291	59.4301	14.0015
				16.4697	48.2404	26.0233
				22.4666	35.022	23.3666
				16.64	29.9968	41.5884
					28.184	31.4545
					22.9697	18.0625
					56.1184	24.9221
						11.7626
Average	22.7674	21.6594	23.6382	20.0798	34.4291	28.6754	33.6896	33.94	39.4876	37.4826
