# Supplementary material for: Role of distinct fibroblast lineages and immune cells in dermal repair following UV radiation-induced tissue damage
Source: eLife journal article supplement (doi:10.7554/elife.71052), 2021-12-23
Supplement: supp [file elife-71052-supp-v1.zip › elife_poa_e71052_Figure_3_source_data_1.xlsx]

## Sheet: Figure 3B
	Lrig1-Cre x tdTomato lineage tracing after acUVB																							Dlk1-Cre x tdTomato lineage tracing after acUVB
		Upper dermis						Lower dermis																Upper dermis					Lower dermis
	Control	1271.44	1490.39	1765.2				1399.07	1296.55	1263.79													Control	6.18215	21.1081	53.2476	16.431	26.529	127.95	49.6499	138.649	48.5981	73.1732
	acUVB PI 1 day	401.175	467.332	494.308	472.757	824.918	471.737	1052.73	961.795	940.013	1307.63	942.554	991.883										acUVB PI 1 day	7.31149	14.5974	2.98214	24.8981		71.4763	96.5823	47.7022	65.3724
	acUVB PI 4 days	1013.55	989.984	1178.37				998.88	838.514	1076.4													acUVB PI 4 days	27.4202	22.2895	26.0794	3.73509		183.384	111.499	66.0249	61.505
Quantification : Spot detector, scale3, 7pixls, sensitivity 100, sizefilter 50-3000																								Control								acUVB PI 1day								acUVB PI 4days
																																							IR PI4 days
		Control							acUVB PI 1day														PI1d WDTD 3.1g NR 9		tdtomato	area in um2	cells per area mm2				PI24h IR1		tdtomato	area in um2	cells per area mm2				PI4d IR BSU 2		tdtomato	area in um2	cells per area mm2
																							p1d wdtd 31g NR 9 20x1	pap	5	92265	54.1917				18a 1	pap	2	291065	6.87132				15a 1	pap	10	278793	35.8689
		tdtomato	area in µm2	cells per area mm2					tdtomato	area in µm2	cells per area mm2					tdtomato	area in µm2	cells per area mm2						ret	98	1327487	73.8237					ret	241	4617542	52.1923					ret	643	2418026	265.919
WLRT 1.3 a NR 20x1	pap	158	116507	1356.14			WLRT 1.1 a IR 20x1	pap	31	102069	303.716			LrigCre 1 IR BSO 20x1	pap	57	92151	618.55					p1d wdtd 31g NR 9 20x2	pap	2	94804	21.0962				18a 2	pap	2	364208	5.49137				15a 2	pap	10	319221	31.3263
	ret	483	372360	1297.13				ret	325	310534	1046.58				ret	325	367337	884.746						ret	100	1124786	88.9058					ret	322	4378298	73.5446					ret	497	2527343	196.649
WLRT 1.3 a NR 20x2	pap	134	113153	1184.24			WLRT 1.1 a IR 20x2	pap	66	139721	472.37			LrigCre 1 IR BSO 20x1	pap	131	93336	1403.53					p1d wdtd 31g NR 9 20x3	pap	1	114488	8.73454				18b 1	pap	1	397743	2.51419				15b 1	pap	9	332457	27.0712
	ret	426	277359	1535.92				ret	533	504490	1056.51				ret	324	282391	1147.35						ret	52	964276	53.9265					ret	396	5796222	68.3204					ret	377	2582388	145.989
Average	pap	292	229660	1271.44			Average	pap	97	241790	401.175			Average	pap	188	185487	1013.55					Sum	pap	8	301557	26.529				18b 2	pap	5	314695	15.8884				15b 2	pap	5	309492	16.1555
	ret	909	649719	1399.07				ret	858	815024	1052.73				ret	649	649728	998.88						ret	250	3416549	73.1733					ret	391	4095318	95.4749					ret	304	2402209	126.55
																															Sum	pap	10	1367711	7.31149				Sum	pap	34	1239963	27.4202
																							PI1d WDTD 3.1i NR 8		tdtomato	area in um2	cells per area mm2					ret	1350	18887380	71.4763					ret	1821	9929966	183.384
															tdtomato	area in µm2	cells per area mm2						p1d wdtd 31i NR 8 20x1	pap	0	59813	0
		tdtomato	area in µm2	cells per area mm2					tdtomato	area in µm2	cells per area mm2			LrigCre 2 IR BSO 20x1	pap	124	126964	976.655						ret	37	609283	60.7271												PI4d IR BSO 1 14		tdtomato	area in um2	cells per area mm2
WLRT2.3 a NR 20x1	pap	115	77161	1490.39			WLRT 1.1 b IR 20x1	pap	51	155572	327.822				ret	319	442932	720.201					p1d wdtd 31i NR 8 20x2	pap	2	74445	26.8655				PI24h IR2		tdtomato	area in um2	cells per area mm2				p1d wdtd 14a 1	pap	13	313630	41.4501
	ret	300	231384	1296.55				ret	315	364742	863.624			LrigCre 2 IR BSO 20x2	pap	107	107805	992.533						ret	75	647693	115.796				19b 1	pap	2	134049	14.9199					ret	284	2495841	113.789
							WLRT 1.1 b IR 20x2	pap	48	56269	853.045				ret	190	246365	771.213					p1d wdtd 31i NR 8 20x3	pap	3	82725	36.2647					ret	126	967596	130.22				p1d wdtd 14a 2	pap	8	374814	21.3439
								ret	176	145762	1207.45			LrigCre 2 IR BSO 20x3	pap	109	108671	1003.03						ret	58	1211190	47.8868				19b 2	pap	1	71467	13.9925					ret	370	2974782	124.379
							Average	pap	99	211841	467.332				ret	295	269542	1094.45					p1d wdtd 31i NR 8 20x4	pap	0	67350	0					ret	77	1134239	67.8869				p1d wdtd 14b 1	pap	2	381729	5.23932
		tdtomato	area in µm2	cells per area mm2				ret	491	510504	961.795			Average	pap	340	343440	989.984						ret	22	388390	56.6441				Sum	pap	3	205516	14.5974					ret	252	2703551	93.2107
WLRT2.3 b NR 20x1	pap	101	63432	1592.26											ret	804	958839	838.514					p1d wdtd 31i NR 8 20x5	pap	1	70430	14.1985					ret	203	2101835	96.5823				p1d wdtd 14b 2	pap	8	320614	24.9521
	ret	247	215782	1144.67																				ret	30	732577	40.9513													ret	196	1709353	114.663
WLRT2.3 b NR 20x2	pap	118	60633	1946.13				tdtomato	area in µm2	cells per area mm2													p1d wdtd 31i NR 8 20x6	pap	1	83798	11.9335												Sum	pap	31	1390787	22.2895
	ret	202	139500	1448.03			WLRT 1.2 a IR 20x1	pap	43	129787	331.312				tdtomato	area in µm2	cells per area mm2							ret	56	1083617	51.6788				PI1d wdtd 3.1i IR BSO11		tdtomato	area in um2	cells per area mm2					ret	1102	9883527	111.499
Average	pap	219	124065	1765.2				ret	390	420778	926.855			LrigCre 3 IR BSO 20x1	pap	70	53250	1314.55					Sum	pap	5	304303	16.431				p1d wdtd 31i IR 11 20x1	pap	0	116804	0
	ret	449	355282	1263.78			WLRT 1.2 a IR 20x2	pap	90	139276	646.199				ret	148	123167	1201.62						ret	166	3415774	48.5981					ret	81	1409970	57.448				P4d BSO 1 1 new IR 12		tdtomato	area in um2	cells per area mm2
								ret	406	426019	953.009			LrigCre 3 IR BSO 20x1	pap	58	55375	1047.4													p1d wdtd 31i IR 11 20x2	pap	1	103692	9.64395				P4d BSO 1 1 new IR 12 20x1	pap	6	138415	43.3479
							Average	pap	133	269063	494.308				ret	122	127668	955.604														ret	53	1294822	40.9323					ret	89	1568846	56.7296
								ret	796	846797	940.013			Average	pap	128	108625	1178.37					PI 24h NR 1		tdtomato	area in um2	cells per area mm2				p1d wdtd 31i IR 11 20x4	pap	0	114834	0				P4d BSO 1 1 new IR 12 20x2	pap	8	196640	40.6835
															ret	270	250835	1076.4					16a 1	pap	16	348633	45.8935					ret	50	1152473	43.385					ret	142	1517497	93.5751
																								ret	281	1454351	193.213				Sum	pap	1	335330	2.98214				P4d BSO 1 1 new IR 12 20x3	pap	3	133767	22.4271
																							16b 2	pap	15	233553	64.2253					ret	184	3857265	47.7022					ret	62	1234948	50.2045
									tdtomato	area in µm2	cells per area mm2													ret	211	2094175	100.756												P4d BSO 1 1 new IR 12 20x4	pap	0	183033	0
							WLRT 1.2 b IR 20x1	pap	59	104729	563.359												Sum	pap	31	582186	53.2476													ret	95	1555283	61.0821
								ret	471	328766	1432.63													ret	492	3548526	138.649				PI1d IR WDTD1.1a		tdtomato	area in um2	cells per area mm2				Sum	pap	17	651855	26.0794
							WLRT 1.2 b IR 20x2	pap	40	104681	382.113																				PI1d IR WDTD1.1a 20x1	pap	3	120491	24.8981					ret	388	5876574	66.0249
								ret	520	429095	1211.85																					ret	114	1743856	65.3724
							Average	pap	99	209410	472.757
								ret	991	757861	1307.63																												P4d WDTD 1 1e IR 4		tdtomato	area in um2	cells per area mm2
																																							PI4d WDTD 1 1e IR 4 20x1	pap	0	128350	0
																							BS NR PI4d		tdtomato	area in um2	cells per area mm2													ret	54	864806	62.4417
																							p1d wdtd 13a 1	pap	7	626334	11.1761												PI4d WDTD 1 1e IR 4 20x2	pap	0	156646	0
									tdtomato	area in µm2	cells per area mm2													ret	113	4936026	22.8929													ret	107	1706358	62.7067
							WLRT 2.1 b IR 20x1	pap	120	145469	824.918												p1d wdtd 13a 2	pap	10	253981	39.373												PI4d WDTD 1 1e IR 4 20x3	pap	0	104536	0
								ret	470	498645	942.554													ret	115	1883002	61.0727													ret	73	1313962	55.5572
																							p1d wdtd 13b 1	pap	13	407422	31.9079												PI4d WDTD 1 1e IR 4 20x4	pap	2	168188	11.8915
																								ret	162	2739329	59.1386													ret	124	1768821	70.1032
									tdtomato	area in µm2	cells per area mm2												p1d wdtd 13b 2	pap	4	323019	12.3832												PI4d WDTD 1 1e IR 4 20x5	pap	0	106093	0
							WLRT 2.2 a IR 20x1	pap	58	99823	581.028													ret	221	2747815	80.4275													ret	59	1112819	53.0185
								ret	297	310762	955.715												Sum	pap	34	1610756	21.1081												Sum	pap	2	535463	3.73509
							WLRT 2.2 a IR 20x2	pap	44	116399	378.01													ret	611	12306172	49.6499													ret	363	5901960	61.505
								ret	399	390934	1020.63
							Average	pap	102	216222	471.737
								ret	696	701696	991.883												PI3d WDTD 1 1 BSO NR 3		tdtomato	area in um2	cells per area mm2
																							PI3d WDTD 1 1 BSO NR 3 20x1	pap	1	161756	6.18215
																								ret	143	1117626	127.95

## Sheet: Figure 3D
	Lrig1-Cre x tdTomato lineage tracing after chUVB																	Dlk1-Cre x tdTomato lineage tracing after chUVB
		Upper dermis					Lower dermis										Upper dermis						Lower dermis
	Control	1460.65	1333.96	1721.82			1516.99	1814.79	1854.55							Control	10.4984	51.2772	65.5262				88.0448	76.6871	122.395
	chUVB	1094.43	1021.16	850.461	1068.73	1084.13	782.23	777.955	664.627	757.09	1254.42					chUVR	0	6.69259	15.2944	22.0153	15.6001	34.7391	78.1693	65.9751	100.822	100.005	81.0269	103.413
Quantification : Spot detector, scale3, 7pixls, sensitivity 100, sizefilter 50-3000						Quantification : Spot detector, scale3, 7pixls, sensitivity 100, sizefilter 50-3000
		Control						chUVB							Spot detector: scale 4 senitivity 40; size filter 50-3000
		tdtomato	area in µm2	cells per area mm2				tdtomato	area in µm2	cells per area mm2							Control								chUVB
Lrig1 C1 BSO 20x1	pap	89	60825	1463.21		Lrig1Cre 1 BSO 20x1 GFP	pap	80	73775	1084.38								tdtomato+	area (µm2)	cells per area mm2						tdtomato+	area (µm2)	cells per area mm2
	ret	282	198392	1421.43			ret	213	315562	674.986						chUV DLKCreER xtdtomato control C1 BSO 20x1	pap	1	116267	8.60089				chUV DLKCreER xtdtomato 1 BSO 20x1	pap	0	90817	0
Lrig1 C1 BSU 20x1	pap	74	50769	1457.58		Lrig1Cre 1 BSU 20x1	pap	85	76989	1104.05							ret	49	624275	78.491					ret	95	868076	109.437
	ret	194	115388	1681.28			ret	215	231592	928.357						chUV DLKCreER xtdtomato control C1 BSU 20x1	pap	1	74239	13.47				chUV DLKCreER xtdtomato 1 BSU 20x1	pap	0	73882	0
Average	pap	163	111594	1460.65		Average	pap	165	150764	1094.43							ret	35	329785	106.13					ret	33	834866	39.5273
	ret	476	313780	1516.99			ret	428	547154	782.23						Sum	pap	2	190506	10.4984				chUV DLKCreER xtdtomato 1 BSU 20x2	pap	0	59080	0
																	ret	84	954060	88.0448					ret	39	433446	89.9766
		tdtomato+	area (µm2)	cells per area mm2				tdtomato+	area (µm2)	cells per area mm2														Sum	pap	0	223779	0
Lrig1Cre C3 BSO 20x1 GFP	pap	90	69128	1301.93		Lrig1Cre 2 BSO 20x1 GFP	pap	58	68254	849.767															ret	167	2136388	78.1693
	ret	476	253297	1879.22			ret	172	252041	682.429								tdtomato+	area (µm2)	cells per area mm2						tdtomato+	area (µm2)	cells per area mm2
Lrig1Cre C3 BSU 20x1 GFP	pap	144	106290	1354.78		Lrig1Cre 2 BSU 20x1 GFP	pap	99	85492	1158						chUV DLKCreER xtdtomato control C2 BSU 20x1	pap	6	117011	51.2772				chUV DLKCreER xtdtomato 2 BSO 20x1	pap	0	64257	0
	ret	625	353385	1768.61			ret	181	201713	897.315							ret	31	404240	76.6871					ret	55	822841	66.8416
Average	pap	234	175418	1333.96		Average	pap	157	153746	1021.16														chUV DLKCreER xtdtomato 2 BSU 20x1	pap	1	85162	11.7423
	ret	1101	606682	1814.79			ret	353	453754	777.955															ret	17	268480	63.3194
																		tdtomato+	area (µm2)	cells per area mm2				Sum	pap	1	149419	6.69259
																chUV DLKCreER xtdtomato control C3 BSO 20x1	pap	5	72704	68.772					ret	72	1091321	65.9751
		tdtomato+	area (µm2)	cells per area mm2				tdtomato+	area (µm2)	cells per area mm2							ret	64	408736	156.58						tdtomato+	area (µm2)	cells per area mm2
Lrig1CreC4 BSO 20x1	pap	177	109184	1621.12		Lrig1Cre 3 BSO 20x1 GFP	pap	86	97552	881.581						chUV DLKCreER xtdtomato control C3 BSU 20x2	pap	11	80067	137.385				chUV DLKCreER xtdtomato 3 BSO 20x1	pap	1	73948	13.523
	ret	481	248835	1933.01			ret	180	231791	776.562							ret	97	736193	131.759					ret	47	402068	116.896
Lrig1CreC4 BSU 20x1	pap	171	92928	1840.13		Lrig1Cre 3 BSU 20x1 GFP	pap	81	98812	819.738						chUV DLKCreER xtdtomato control C3 BSU 20x1	pap	0	91406	0				chUV DLKCreER xtdtomato 3 BSU 20x1	pap	1	56819	17.5997
	ret	626	348074	1798.47			ret	285	467850	609.17							ret	36	464613	77.4838					ret	58	639377	90.7133
Average	pap	348	202112	1721.82		Average	pap	167	196364	850.461						Sum	pap	16	244177	65.5262				Sum	pap	2	130767	15.2944
	ret	1107	596909	1854.55			ret	465	699641	664.627							ret	197	1609542	122.395					ret	105	1041445	100.821
																										tdtomato+	area (µm2)	cells per area mm2
																								chUV DLKCreER xtdtomato 4 BSO 20x1	pap	4	89452	44.7167
								tdtomato+	area (µm2)	cells per area mm2															ret	23	304082	75.6375
						Lrig1Cre 4 BSO 20x1 GFP	pap	92	86546	1063.02														chUV DLKCreER xtdtomato 4 BSO 20x2	pap	0	78871	0
							ret	212	305389	694.197															ret	49	518776	94.4531
						Lrig1Cre 4 BSU 20x1	pap	89	82814	1074.7														chUV DLKCreER xtdtomato 4 BSU 20x1	pap	2	104215	19.1911
							ret	217	261254	830.609															ret	60	497074	120.706
						Average	pap	181	169360	1068.73														Sum	pap	6	272538	22.0153
							ret	429	566643	757.09															ret	132	1319932	100.005
																										tdtomato+	area (µm2)	cells per area mm2
																								chUV DLKCreER xtdtomato 5 BSO 20x1	pap	2	86897	23.0158
								tdtomato+	area (µm2)	cells per area mm2															ret	34	315632	107.72
						Lrig1Cre 6 BSO 20x1	pap	102	97059	1050.91														chUV DLKCreER xtdtomato 5 BSU 20x1	pap	1	105409	9.48686
							ret	333	248933	1337.71															ret	82	1115991	73.4773
						Lrig1Cre 6 BSU 20x1	pap	80	70818	1129.66														Sum	pap	3	192306	15.6001
							ret	110	104217	1055.49															ret	116	1431623	81.0269
						Average	pap	182	167877	1084.13
							ret	443	353150	1254.42
																										tdtomato+	area (µm2)	cells per area mm2
																								chUV DLKCreER xtdtomato 6 BSU 20x1	pap	4	115144	34.7391
																									ret	93	899303	103.413

## Sheet: Figure 3F
	Average cell size after chUVB single measurments (um)
	Control	chUVR
	23.2278	30.8113
	16.6485	38.1251
	14.2643	26.1833
	11.9275	52.0949
	22.7539	37.5226
	19.2556	27.4274
	30.4031	36.7334
	19.1457	51.5222
	20.9215	40.482
	19.6644	30.955
	20.2741	43.2062
	18.4548	22.1643
	12.3884	18.5536
	33.5621	57.3326
	19.3654	40.8389
	23.9623	46.7786
	22.7533	40.4203
	18.2468	28.0462
	23.4032	24.5811
	26.1515	30.8958
	26.7891	27.9435
	18.1629	28.1125
	18.2429	20.8949
	10.6021	31.6726
	25.5873	35.2625
	17.238	27.3656
	20.8884	30.0495
	23.946	29.4099
	13.9906	39.145
	29.0914	47.4422
	21.3174	33.7376
	25.2999	37.5941
	24.9256	18.3177
	11.152	31.9676
	24.2391	28.3231
	40.2857	39.3126
	28.8724	28.6163
	39.1846	27.1752
	20.2728	23.7692
	19.3472	36.4734
	23.7536	35.891
	27.8577	49.827
	21.3733	47.9323
	24.3243	39.3036
	18.761	37.2346
	19.0164	33.3294
	25.8544	30.7053
	23.1387	32.6579
	22.1299	33.0018
	25.0042	47.4975
	17.8366	28.5343
	24.0903	35.672
	24.4335	37.0442
	31.8221	31.3255
	23.0952	30.4954
	17.3102	48.6434
	21.2452	41.3036
	24.9158	33.0168
	9.70515	39.9906
	40.6744	24.4641
	31.6764	35.4289
	37.3477	35.3665
	35.1351	41.5298
	36.6613	31.1025
	31.094	50.8963
	25.2661	34.7334
	28.7605	34.5898
	14.4202	58.6358
	36.3454	25.5684
	24.8917	28.6598
	27.0556	29.5399
	18.6134	39.0195
	30.5949	13.351
	29.6562	12.4871
	34.5767	36.7458
	22.007	19.24
	22.0636	26.9198
	18.6335	30.1684
	25.6795	40.7758
	20.9508	49.5859
	18.5185	28.2653
	21.6749	54.1762
	28.5467	31.4723
	16.0667	35.0759
	15.0534	44.2293
	18.6271	36.8901
	14.8252	28.6689
	11.9542	15.9153
	27.8324	34.6613
	9.14355	23.6262
	17.2458	35.2612
	12.2661	30.3986
	19.8601	37.7572
	18.317	15.4694
	10.1836	20.4666
	23.3708	59.4301
	19.8543	48.2404
	19.0411	35.022
	12.8122	29.9968
	18.2663	28.184
	16.6283	22.9697
	24.8079	56.1184
	11.3438	48.5541
	23.1874	29.5777
	18.5939	19.907
	14.8882	46.5527
	28.9315	23.511
	14.7738	20.8463
	13.8886	39.2615
	17.7379	37.5156
	25.7224	33.2035
	25.0711	28.4109
	17.5325	40.1834
	39.2711	34.5718
	22.4016	42.669
	30.6989	29.3037
	20.3957	20.4699
	26.1202	26.647
	18.6595	25.3791
	26.3412	34.0213
	11.7227	43.1873
	14.9818	18.6205
	41.7027	25.5893
	39.1332	22.6275
	35.7214	23.4775
	21.2043	42.2635
	46.0297	24.4751
	29.5081	27.2719
	23.6093	29.6986
	16.0745	23.7807
	21.8946	23.1936
	17.1847	24.6791
	33.3366	22.8346
	25.5879	24.5117
	23.2304	45.6735
	21.3336	33.4955
	21.5683	21.0645
	15.3712	21.9654
	30.4376	20.8419
	21.9577	24.0163
	17.1554	33.4459
	17.2393	12.1433
	10.5716	27.8343
	23.3655	39.6484
	25.166	35.7002
	26.7527	24.9934
	16.0784	27.4666
	24.7188	13.7262
	18.7272	10.2573
	15.4785	12.723
	30.652	41.9635
	29.612	32.6715
	21.4591	29.1654
	12.6555	38.1188
	28.2054	29.0371
	12.8382	40.5765
	26.4173	24.6066
	23.294	20.2077
	19.1913	27.275
	22.3743	21.6882
	29.5295	16.5608
	33.5433	22.8073
	20.1812	28.2949
	28.3173	26.4845
	26.9373	29.2807
	28.8457	33.3926
	43.4772	26.1398
	27.2896	28.8889
	21.0808	18.4369
	22.9639	20.9684
	30.9927	21.2121
	22.2684	23.2134
	25.1102	42.3014
	15.9009	32.4403
	35.1409	33.3262
	42.0686	29.4277
	12.9597	31.6721
	27.5282	30.3918
	17.4538	41.6745
	21.1672	29.5827
	27.0413	35.9687
	23.3272	33.3126
	17.7281	40.3564
	7.01805	40.1723
	22.969	24.9029
	25.6217	34.2166
	28.5201	22.9772
	32.7691	21.5295
	29.6517	25.9272
	25.0536	38.6793
	37.3561	36.2421
	28.7878	32.271
	33.6407	20.7843
	15.4213	27.0952
	24.3705	37.7636
	26.702	23.4416
	26.8762	33.1409
	22.7507	14.0015
	31.2962	26.0233
	11.9957	23.3666
	22.4295	41.5884
	22.2053	31.4545
	34.4858	18.0625
	15.2951	24.9221
	25.8453	11.7626
	22.1994	33.5257
	21.1477	21.9765
	11.5538	34.6307
	8.5215	49.0808
	17.2094	27.3117
	21.513	29.2364
	31.8792	23.7081
	29.3117	26.5284
	15.8476	25.5814
	17.2744	27.8596
	18.9716	38.0881
	16.5906	46.4997
	26.2067	31.4431
	12.4807	33.9813
	17.7385	20.8942
	25.166	25.2096
	17.7177	22.9619
	12.7582	22.1104
	10.595	29.8526
	12.8979	28.6292
	13.2178	19.2315
	30.3921	16.9013
	19.8321	23.5313
	20.2904	24.0871
	14.3884	34.3025
	18.6732	40.1837
	13.2411	34.7704
	24.5551	42.7921
	17.7768	20.4958
	30.9836	19.7801
	19.0853	79.1375
	20.3879	32.3537
	11.7624	27.6594
	14.7505	36.2271
	23.0458	33.5673
	10.3811	49.8342
	10.6867	32.305
	30.1171	23.0841
	8.49875	31.8676
	14.8298	34.8588
	18.8896	30.9017
		44.8623
		40.6237
		27.9279
		44.3787
		28.1496
		28.0117
		28.9841
		73.06
		25.402
		61.9678
		25.4001
		33.5972
		16.4028
		22.4595
		30.2451
		41.1164
		37.4634
		35.9457
		50.8606
		60.1061
		20.7727
		24.2099
		23.8426
		26.6097
		22.0623
		53.0757
		76.375
		46.2124
		37.8021
		36.6691
		27.5333
		31.7642
		25.7757
		27.9838
		33.7655
		23.077
		34.8348
		32.7704
		37.6915
		30.6462
		46.0129
		28.4368
		57.1753
		25.2551
		20.6882
		26.5415
		43.9361
		28.4843
		36.1439
		34.6392
		30.7742
		31.3788
		42.3462
		28.1392
		22.7831
		32.9797
		53.5087
		37.4445
		32.8543
		36.827
		38.7166
		24.4017
		34.8302
		28.8132
		40.9325
		48.7838
		38.0906
		33.1253
		30.3394
		36.1036
		42.0303
		18.3742
		30.7684
		34.7782
		35.3782
		27.1083
		40.9363
		34.7146
		27.0062
		25.3545
		21.9856
		28.953
		38.0679
		31.5224
		47.6457
		36.0399
		38.7238
		43.3342
		32.8907
		35.2632
		34.5403
		33.6843
		66.118
		53.9968
		29.2831
		27.8596
		27.0537
		38.7192
		31.7278
		75.9785
		43.8535
		36.3675
		27.4703
		35.5953
		25.961
		35.0187
		60.4864
		48.9132
		68.8545
		38.5099
		26.4329
		35.0889
		32.7873
		48.7851
		45.3901
		33.618
		43.5201
		40.612
		42.0258
		32.7405
		43.2582
		46.0609
		38.5866
		41.9276
		41.5636
		43.9855
		34.71
		35.3626
		45.6099
		33.8813
		26.9744
		44.3306
		50.9151
		39.5486
		29.6309
		40.6367
		48.956
		52.9588
		45.9297
		32.6619
		28.6143
		33.0609
		21.5923
		23.0022
		44.1135
		29.9877
		24.7117
		39.3705
		59.1734
		34.1198
		53.2103
		51.1076
		23.6256
		30.4031
		29.1363
		38.5502
		47.4455
		42.6771
		25.9584
		29.5458
		39.6298
		41.6663
		39.2191
		36.6138
		44.5998
		37.6792
		40.2968
		39.5219
		44.9027
		45.8536
		45.2972
		43.8971
		35.0448
		42.8727
		28.8275
		26.6208
		20.3678
		33.7642
		20.5992
		40.7654
		29.0654
		40.6744
		25.2219
		27.8785
		21.8185
		29.3306
		36.8485
		41.3381
		43.1489
		44.0551
		48.7578
		39.2977
		45.6801
		53.2415
		48.1865
		48.9944
		35.163
		37.8391
		24.5856
		38.9571
		23.606
		26.364
		36.2837
		28.6546
		47.2687
		32.8244
		52.0338
		52.3731
		26.5447
		44.4528
		27.9084
		46.696
		29.6822
		38.0094
		35.7428
		23.467
		41.4329
		30.1704
		31.4821
		44.6277
		61.8579
