# Supplementary material for: Role of distinct fibroblast lineages and immune cells in dermal repair following UV radiation-induced tissue damage
Source: eLife journal article supplement (doi:10.7554/elife.71052), 2021-12-23
Supplement: supp [file elife-71052-supp-v1.zip › elife_poa_e71052_Figure_4_figure_supplement_1_source_data_1.xlsx]

## Sheet: Figure S4B
		Fibroblasts displaced over 5um in z direction (%) after acUVB																																									Fibroblasts displaced over 5um in x direction (%)
																																											Control	1DPI	4DPI
																																										Mouse 1	4.64	1.99	2.33
		Control	1DPI	4DPI																																						Mouse 2	2.61	2.33	1.1
	Mouse 1	6.52921	3.64	8.72																																						Mouse 3	0.71	1.19	21.67
	Mouse 2	2.61	2.33	7.72																																						Mouse 4		2.63	44.2
	Mouse 3	3.07	7.14	13.33																																						Mouse 5		2.43
	Mouse 4		11.84	9.42																																						Mouse 6		3.57
	Mouse 5		6.08
	Mouse 6		13.57
	Control 1			Control 2			Control 3			acUVB PI 1day 1			acUVB PI 1day 2			acUVB PI 1day 3			acUVB PI 1day 4			acUVB PI 1day 5			acUVB PI 1day 6			acUVB PI 4days 1			acUVB PI 4days 2			acUVB PI 4days 3			acUVB PI 4days 4					Control 1			Control 2			Control 3
	z			z			z			z			z			z			z			z			z			z			z			z			z					x			x			x
	-10.247			-6.9643			-5.4211			-7.554			-9.529			-10.013			-19.8954			-8.7229			-12.866			-8.586			-13.538			-10.4297			-14.2016					-3.66901			-11.477			-6.455
	-9.3879			-6.599			-5.1874			-5.6906			-7.1566			-8.12791			-5.7435			-5.2349			-6.3523			-3.7868			-8.9936			-8.5026			-11.9773					-2.444			-10.7405			-5.27399
	-5.10899			-6.303			-4.4288			-5.5546			-6.037			-5.549			-5.0904			-3.144			-6.224			-3.3248			-8.4125			-8.0709			-11.3009					-2.23199			-10.641			-5.052
	-4.62			-5.4563			-4.148			-5.517			-5.754			-5.097			-4.6352			-3.1439			-4.312			-3.025			-8.2595			-7.8114			-8.9379					-2.22998			-10.211			-4.94101
	-4.528			-5.2827			-3.802			-5.438			-4.843			-5.034			-4.574			-2.8318			-4.3049			-2.993			-7.6653			-7.6376			-8.5902					-1.862			-9.015			-4.728
	-4.02299			-5.1124			-3.79269			-5.3869			-4.733			-4.89899			-4.4106			-2.5904			-3.075			-2.1794			-7.643			-7.3992			-6.8683					-1.79398			-8.4487			-4.661
	-3.964			-4.9953			-3.543			-5.325			-4.6039			-4.7989			-4.0162			-2.2434			-2.8369			-2.0172			-6.922			-6.0398			-6.7524					-1.793			-6.33801			-3.5072
	-3.68501			-4.84399			-3.525			-5.19501			-4.4607			-4.792			-3.9398			-2.2322			-2.443			-1.26611			-6.5387			-4.92432			-6.4271					-1.79099			-6.2424			-3.4985
	-3.67201			-4.7147			-3.4981			-4.666			-3.9133			-4.599			-3.9122			-1.796			-2.2687			-0.806			-6.1147			-4.4964			-5.9815					-1.76898			-6.118			-3.427
	-3.14			-4.655			-3.3863			-4.43199			-3.5507			-4.506			-3.802			-1.6128			-2.1992			-0.744003			-5.2269			-4.45662			-5.7891					-1.711			-6.0798			-3.21901
	-3.092			-4.4537			-3.342			-4.352			-3.2244			-4.33			-3.6288			-1.5241			-1.945			-0.702003			-5.1705			-3.7901			-5.5746					-1.69299			-5.7381			-3.164
	-3.091			-4.4156			-3.3022			-4.27699			-2.8022			-4.2502			-3.487			-1.4812			-1.3744			-0.694			-4.6783			-3.71279			-5.5179					-1.506			-5.6496			-2.96201
	-2.6482			-4.263			-3.26199			-4.235			-1.4362			-4.136			-3.4223			-1.4333			-1.3035			-0.411995			-4.64471			-3.0491			-5.34					-1.505			-5.5815			-2.939
	-2.612			-4.218			-3.2438			-4.151			-1.307			-4.108			-3.3673			-1.2879			-1.04799			-0.353989			-4.5739			-2.2807			-5.2572					-1.49701			-5.325			-2.672
	-2.441			-4.1699			-3.2113			-4.094			-1.221			-4.105			-3.2465			-1.2474			-0.961501			-0.281998			-4.54881			-2.2725			-5.2273					-1.39297			-5.2778			-2.47501
	-2.32			-3.978			-3.1901			-4.06999			-0.957094			-3.948			-3.2453			-1.1032			-0.789			-0.266998			-4.507			-2.2566			-5.18671					-1.35199			-5.249			-2.43408
	-1.728			-3.94501			-3.162			-3.977			-0.938005			-3.84401			-3.24291			-1.0785			-0.517996			-0.192001			-4.16129			-2.183			-5.1156					-1.26501			-5.17801			-2.39021
	-1.709			-3.94299			-3.158			-3.92601			-0.926996			-3.66299			-3.1775			-1.0598			-0.506003			-0.101997			-3.9753			-1.7456			-5.0546					-1.259			-4.97			-2.362
	-1.69101			-3.82			-3.156			-3.84199			-0.918001			-3.54701			-3.1162			-0.959502			-0.392599			0			-3.645			-1.4664			-5.0113					-1.151			-4.952			-2.32899
	-1.45801			-3.817			-3.1384			-3.84001			-0.8808			-3.54399			-3.1085			-0.812			-0.103598			0.100998			-3.6088			-1.2452			-4.9546					-0.945999			-4.8441			-2.153
	-1.4412			-3.687			-3.1146			-3.72099			-0.872995			-3.483			-3.0795			-0.7989			-0.0779022			0.102997			-3.5251			-1.2112			-4.8928					-0.927002			-4.753			-2.13689
	-1.31			-3.623			-3.0608			-3.60999			-0.864			-3.466			-3.0303			-0.641799			-0.00900116			0.111			-3.4913			-1.1574			-4.57149					-0.800018			-4.6197			-2.054
	-1.21501			-3.61			-3.056			-3.436			-0.860902			-3.437			-2.9699			-0.481601			0.00700531			0.115494			-3.406			-1.0568			-4.4729					-0.791992			-4.5749			-2.008
	-1.189			-3.5958			-3.035			-3.427			-0.808			-3.435			-2.8667			-0.468002			0.0492035			0.242004			-3.40311			-1.0076			-4.4617					-0.787994			-4.556			-1.9951
	-1.08501			-3.569			-3.0281			-3.418			-0.789804			-3.257			-2.8547			-0.3908			0.207994			0.293999			-3.391			-0.926			-4.4329					-0.720001			-4.35399			-1.983
	-1.009			-3.5365			-3.00211			-3.3279			-0.757997			-3.155			-2.8388			-0.3791			0.212			0.3433			-3.3276			-0.879898			-4.3186					-0.690002			-4.3108			-1.95099
	-0.900002			-3.46899			-2.98589			-3.32399			-0.704004			-3.095			-2.8343			-0.331798			0.394903			0.396996			-3.3046			-0.8598			-4.2832					-0.687401			-4.3082			-1.92
	-0.802002			-3.4646			-2.9679			-3.308			-0.7017			-2.963			-2.8251			-0.298999			0.426698			0.403			-3.2992			-0.831902			-4.2593					-0.681			-4.2719			-1.8599
	-0.800003			-3.3596			-2.9495			-3.237			-0.694002			-2.825			-2.7861			-0.210799			0.501703			0.428001			-3.299			-0.75468			-4.2488					-0.661987			-4.2266			-1.79901
	-0.791992			-3.35011			-2.9067			-3.23601			-0.679498			-2.672			-2.7595			-0.207			0.5431			0.445			-3.2607			-0.632099			-4.2363					-0.612			-4.2024			-1.79401
	-0.766998			-3.258			-2.8923			-3.22			-0.652101			-2.495			-2.7279			-0.0457985			0.645204			0.490997			-3.252			-0.618904			-4.2298					-0.575989			-4.16299			-1.776
	-0.757996			-3.2302			-2.8438			-3.20801			-0.637098			-2.492			-2.6865			-0.000201416			0.926298			0.499001			-3.20271			-0.5732			-4.1306					-0.516998			-4.1444			-1.681
	-0.746002			-3.189			-2.84			-3.19701			-0.634698			-2.465			-2.6844			0.0038002			0.973497			0.508003			-3.07909			-0.572102			-4.1215					-0.506989			-4.13199			-1.66699
	-0.745995			-3.16901			-2.8041			-3.177			-0.631006			-2.37			-2.6787			0.0209015			0.991499			0.548698			-3.0775			-0.521004			-4.0171					-0.483002			-4.0921			-1.66299
	-0.724998			-2.942			-2.7966			-3.151			-0.6			-2.34			-2.6355			0.0755966			1.054			0.566002			-3.0667			-0.506599			-3.9835					-0.373993			-4.0585			-1.662
	-0.612999			-2.8664			-2.75661			-3.151			-0.6			-2.18599			-2.4079			0.138701			1.0789			0.577003			-3.058			-0.481201			-3.9717					-0.340401			-4.0471			-1.65701
	-0.605003			-2.849			-2.752			-3.103			-0.596601			-2.17599			-2.4014			0.145001			1.1211			0.610001			-3.0462			-0.476799			-3.93301					-0.328003			-4.047			-1.653
	-0.599007			-2.8366			-2.7494			-3.05901			-0.595102			-1.992			-2.3643			0.154301			1.1534			0.755005			-3.0445			-0.426796			-3.9039					-0.2873			-4.0374			-1.62601
	-0.460999			-2.8189			-2.7483			-3.04999			-0.594003			-1.979			-2.3538			0.193997			1.286			0.798996			-3.003			-0.405502			-3.84151					-0.248299			-4.034			-1.612
	-0.450005			-2.7842			-2.6627			-3.008			-0.587801			-1.959			-2.3073			0.219403			1.2997			0.803993			-2.9869			-0.360102			-3.7296					-0.222992			-3.9404			-1.60498
	-0.449005			-2.7622			-2.6131			-2.997			-0.532495			-1.939			-2.2831			0.3924			1.41499			0.823997			-2.981			-0.339001			-3.6991					-0.220993			-3.9398			-1.59598
	-0.444			-2.7534			-2.612			-2.854			-0.519495			-1.921			-2.2609			0.487397			1.4263			0.843994			-2.87801			-0.323799			-3.6127					-0.175499			-3.93503			-1.586
	-0.371002			-2.67099			-2.6089			-2.85001			-0.518999			-1.907			-2.2541			0.760102			1.4271			0.936996			-2.8429			-0.303196			-3.6119					-0.173195			-3.9075			-1.54399
	-0.361008			-2.667			-2.5973			-2.806			-0.505998			-1.83299			-2.1703			0.789399			1.4603			0.970001			-2.7645			-0.2668			-3.5978					-0.169998			-3.746			-1.53601
	-0.326004			-2.647			-2.5786			-2.762			-0.501993			-1.83099			-2.1547			0.835698			1.5222			1.01			-2.7386			-0.240803			-3.5726					-0.151001			-3.664			-1.513
	-0.231003			-2.60799			-2.5744			-2.761			-0.494997			-1.756			-2.15109			0.866299			1.6146			1.027			-2.6622			-0.2379			-3.551					-0.135986			-3.6288			-1.48499
	-0.225006			-2.60001			-2.57			-2.75999			-0.489			-1.74301			-2.1348			0.896802			1.6927			1.047			-2.6076			-0.21824			-3.53599					-0.110016			-3.62061			-1.4571
	-0.203003			-2.539			-2.5694			-2.75999			-0.481004			-1.6381			-2.0734			0.920998			1.7127			1.054			-2.5178			-0.216			-3.4838					-0.0109024			-3.61902			-1.45599
	-0.170998			-2.45			-2.528			-2.751			-0.479997			-1.61501			-2.068			0.926999			1.787			1.056			-2.515			-0.181305			-3.4805					-0.0039978			-3.584			-1.442
	-0.169998			-2.354			-2.524			-2.74			-0.478098			-1.582			-2.0676			0.987099			1.9102			1.0604			-2.3944			-0.167801			-3.4554					0			-3.5671			-1.435
	-0.132996			-2.3377			-2.5008			-2.72			-0.472002			-1.544			-2.0646			0.993398			1.97801			1.06799			-2.139			-0.161201			-3.3633					0			-3.55899			-1.42601
	-0.128998			-2.32999			-2.4875			-2.709			-0.463998			-1.537			-2.0491			1.0869			2.0378			1.076			-2.0966			-0.119503			-3.33539					0			-3.5582			-1.39499
	-0.128998			-2.293			-2.47771			-2.62801			-0.450998			-1.42401			-2.0408			1.1229			2.1561			1.151			-2.0742			-0.0669975			-3.31911					0			-3.547			-1.38599
	-0.098999			-2.24			-2.475			-2.62199			-0.449297			-1.37201			-2.038			1.1586			2.234			1.154			-2.058			-0.0624008			-3.3142					0			-3.4754			-1.38599
	-0.0899963			-2.2188			-2.4646			-2.618			-0.440996			-1.337			-2.0324			1.1774			2.3326			1.16699			-2.0013			0.0282993			-3.31171					0			-3.4606			-1.384
	-0.0849991			-2.2122			-2.4627			-2.617			-0.418398			-1.3102			-1.9702			1.1937			2.3376			1.232			-1.995			0.0562973			-3.3018					0			-3.428			-1.37199
	-0.0829926			-2.20999			-2.4535			-2.59999			-0.409204			-1.182			-1.9097			1.4359			2.359			1.251			-1.87379			0.0671997			-3.2946					0			-3.384			-1.36902
	-0.0790024			-2.1529			-2.4534			-2.597			-0.388895			-1.117			-1.9017			1.4406			2.43849			1.255			-1.82401			0.106297			-3.2813					0			-3.3431			-1.2897
	-0.0759964			-2.1176			-2.4401			-2.59599			-0.3845			-1.10001			-1.8761			1.479			2.6397			1.271			-1.7399			0.122669			-3.2796					0			-3.3131			-1.258
	-0.0310059			-2.112			-2.422			-2.57899			-0.375902			-1.077			-1.8444			1.6619			2.696			1.282			-1.6442			0.143005			-3.2738					0			-3.2909			-1.257
	0.00100708			-2.104			-2.4107			-2.576			-0.375406			-0.882996			-1.7762			1.7212			2.9193			1.316			-1.5809			0.154003			-3.257					0			-3.272			-1.2567
	0.00100708			-2.0953			-2.39771			-2.554			-0.375299			-0.85701			-1.7644			1.7323			3.3153			1.339			-1.514			0.241501			-3.1206					0			-3.26001			-1.25101
	0.00900269			-2.082			-2.3938			-2.549			-0.366403			-0.776001			-1.724			1.7807			3.326			1.343			-1.4568			0.2724			-3.0919					0			-3.2457			-1.241
	0.0650024			-2.067			-2.37939			-2.543			-0.362695			-0.751999			-1.7218			1.8533			3.3613			1.3653			-1.391			0.321501			-3.0863					0.0350037			-3.2332			-1.237
	0.0720062			-2.0425			-2.3695			-2.53799			-0.354005			-0.737991			-1.712			1.8664			3.373			1.384			-1.33681			0.341103			-3.0637					0.0370026			-3.2157			-1.21298
	0.102997			-2.0346			-2.3676			-2.48999			-0.343103			-0.525009			-1.6999			1.8738			3.6075			1.42599			-1.334			0.343901			-3.0563					0.0500183			-3.15701			-1.207
	0.112			-2.022			-2.3396			-2.45801			-0.337007			-0.442894			-1.6902			1.9336			3.894			1.439			-1.292			0.415901			-2.9962					0.0619965			-3.065			-1.18901
	0.121002			-2.0014			-2.336			-2.452			-0.295801			-0.442001			-1.6707			1.9462			3.9183			1.497			-1.236			0.4702			-2.9792					0.100006			-3.04401			-1.15399
	0.123993			-1.9772			-2.332			-2.44299			-0.281496			-0.421005			-1.6592			2.033			4.7108			1.538			-1.1177			0.47173			-2.949					0.118011			-3.01999			-1.153
	0.130997			-1.95801			-2.3312			-2.42999			-0.281			-0.391998			-1.617			2.0719			4.7787			1.59			-1.0104			0.494999			-2.9312					0.167999			-2.997			-1.14801
	0.159012			-1.94499			-2.3071			-2.40401			-0.276994			-0.354996			-1.5966			2.111			5.2208			1.65199			-0.723999			0.535606			-2.917					0.169006			-2.9962			-1.13799
	0.182999			-1.89999			-2.288			-2.39799			-0.271707			-0.334991			-1.5867			2.1776			5.6464			1.661			-0.699997			0.53761			-2.8642					0.17099			-2.9814			-1.099
	0.186005			-1.899			-2.2816			-2.39601			-0.267999			-0.305			-1.556			2.2264			6.0006			1.999			-0.683804			0.555			-2.8227					0.171997			-2.98001			-1.092
	0.200005			-1.895			-2.263			-2.383			-0.267801			-0.215988			-1.5545			2.2346			6.1822			2.005			-0.654999			0.584801			-2.7801					0.190002			-2.9784			-1.04401
	0.210999			-1.89299			-2.2626			-2.383			-0.258096			-0.186005			-1.5521			2.2561			6.5786			2.011			-0.635303			0.598599			-2.7785					0.194977			-2.959			-1.04398
	0.21701			-1.86801			-2.255			-2.379			-0.257097			-0.0360031			-1.5469			2.2922			6.8765	Number of Fbs displaced up and down > 5um		2.053			-0.573303			0.602798			-2.7689					0.237			-2.956			-1.039
	0.220001			-1.847			-2.2491			-2.36			-0.253999			0.213005			-1.5308			2.3603		totla Fbs	76	9		2.05499			-0.559601			0.640499			-2.744					0.242004			-2.944			-1.036
	0.238998			-1.8448			-2.2443			-2.35901			-0.235994			0.578003			-1.51769			2.3751		% of Fbs displaced up and down > 5um	11.8421			2.127			-0.546799			0.649498			-2.7214					0.248993			-2.7981			-1.01799
	0.255005			-1.839			-2.2403			-2.33			-0.224001			1.654			-1.5152			2.384						2.174			-0.532906			0.653702			-2.70251					0.249023			-2.7811			-1.01599
	0.311996			-1.8379			-2.218			-2.319			-0.215105			2.0048			-1.5069			2.4295						2.1753			-0.497002			0.667404			-2.6871					0.27301			-2.7744			-1.0002
	0.317993			-1.8223			-2.2105			-2.31001			-0.208002			2.78799			-1.5062			2.44021						2.202			-0.496498			0.678101			-2.6657					0.290985			-2.73399			-0.980988
	0.335999			-1.81969			-2.1714			-2.289			-0.174402			3.1379			-1.5044			2.487						2.22			-0.490898			0.716797			-2.6628					0.293201			-2.7229			-0.975006
	0.335999			-1.8046			-2.166			-2.26999			-0.172197			4.3			-1.4939			2.4883						2.321			-0.463799			0.742401			-2.6544					0.29599			-2.71			-0.972
	0.357002			-1.745			-2.162			-2.244			-0.170007			5.372	Number of Fbs displaced up and down > 5um		-1.4881			2.5027						2.326			-0.448997			0.833397			-2.6371					0.318008			-2.6823			-0.970997
	0.358994			-1.593			-2.1464			-2.235			-0.163599		totla Fbs	84	6		-1.4797			2.5247						2.354			-0.418694			0.858501			-2.5994					0.322403			-2.6606			-0.936005
	0.359001			-1.578			-2.145			-2.231			-0.107996		% of Fbs displaced up and down > 5um	7.14286			-1.4584			2.5757						2.413			-0.369995			0.869202			-2.56531					0.356018			-2.65399			-0.933014
	0.374001			-1.52901			-2.128			-2.212			-0.106996						-1.4491			2.5903						2.451			-0.368996			0.875			-2.56351					0.36499			-2.6159			-0.912994
	0.380997			-1.528			-2.10889			-2.20799			-0.102998						-1.4487			2.6182						2.4572			-0.350098			0.894501			-2.5494					0.367004			-2.6016			-0.904999
	0.387001			-1.50999			-2.1065			-2.19101			-0.0860001						-1.44641			2.6524						2.489			-0.307899			0.922529			-2.5464					0.378998			-2.591			-0.89502
	0.391006			-1.476			-2.09351			-2.177			-0.0789963						-1.4323			2.6891						2.522			-0.189606			0.9445			-2.543					0.397995			-2.571			-0.882996
	0.393005			-1.4482			-2.07951			-2.172			-0.0769974						-1.416			2.738						2.5877			-0.0410004			1.1286			-2.5391					0.412994			-2.561			-0.850006
	0.412003			-1.425			-2.0637			-2.16501			-0.065004						-1.3919			2.7601						2.604			0.0019989			1.1566			-2.51971					0.419006			-2.56			-0.837006
	0.445007			-1.399			-2.0206			-2.138			-0.0645996						-1.3571			2.812						2.619			0.0429993			1.21077			-2.4711					0.460999			-2.5592			-0.813019
	0.466995			-1.38899			-2.0101			-2.136			-0.061998						-1.3521			2.815						2.729			0.0630035			1.26533			-2.4701					0.461975			-2.5562			-0.809998
	0.475998			-1.387			-1.993			-2.13499			-0.00599823						-1.3487			2.883						2.73401			0.146099			1.2842			-2.4509					0.464996			-2.55499			-0.794998
	0.476997			-1.355			-1.989			-2.132			0.00499573						-1.331			3.1023						2.827			0.191696			1.2903			-2.4377					0.479004			-2.51001			-0.785995
	0.487			-1.336			-1.9768			-2.118			0.0320038						-1.32601			3.1358						2.84401			0.232994			1.306			-2.4331					0.488983			-2.50699			-0.782501
	0.505997			-1.33099			-1.9569			-2.09999			0.0557007						-1.3135			3.1846						2.86199			0.2845			1.3698			-2.398					0.514984			-2.49701			-0.781898
	0.514999			-1.3281			-1.9351			-2.095			0.0700058						-1.3079			3.2418						2.945			0.317703			1.4034			-2.3893					0.524994			-2.4929			-0.779999
	0.526001			-1.3273			-1.835			-2.09001			0.0719971						-1.28961			3.2459						2.998			0.320999			1.4338			-2.385					0.560997			-2.467			-0.776001
	0.537003			-1.2618			-1.823			-2.084			0.0869965						-1.2883			3.2614						3.017			0.337395			1.44289			-2.3743					0.566986			-2.4598			-0.766699
	0.550995			-1.23901			-1.818			-2.03099			0.0969986						-1.2882			3.2833						3.0396			0.391998			1.446			-2.3692					0.590012			-2.4445			-0.7654
	0.551994			-1.218			-1.813			-2.026			0.0983948						-1.2842			3.2998						3.052			0.391998			1.4498			-2.353					0.597015			-2.4408			-0.76001
	0.565002			-1.1812			-1.787			-2.01801			0.108504						-1.2531			3.3216						3.10001			0.429001			1.9235			-2.3516					0.598999			-2.439			-0.748802
	0.575989			-1.16399			-1.78			-1.99699			0.113997						-1.2521			3.3712						3.101			0.498001			1.94733			-2.3487					0.611008			-2.4307			-0.740997
	0.601006			-1.1594			-1.7738			-1.965			0.123						-1.2436			3.5298						3.1348			0.508301			1.9573			-2.3337					0.613007			-2.4162			-0.725983
	0.602005			-1.147			-1.76801			-1.957			0.141005						-1.2291			3.7655						3.1813			0.650204			2.0294			-2.292					0.652008			-2.40031			-0.707001
	0.607994			-1.13901			-1.7677			-1.953			0.197699						-1.2144			3.7892						3.22099			0.706802			2.081			-2.2822					0.653			-2.3946			-0.705002
	0.609009			-1.132			-1.765			-1.933			0.218001						-1.1988			3.8248						3.272			0.7276			2.1173			-2.2647					0.654999			-2.3922			-0.703003
	0.627998			-1.12901			-1.754			-1.914			0.287001						-1.1979			3.8506						3.292			0.751499			2.1858			-2.252					0.65799			-2.37201			-0.677002
	0.64801			-1.12799			-1.7482			-1.912			0.288504						-1.19311			3.85769						3.299			0.757996			2.2121			-2.239					0.70697			-2.3443			-0.673996
	0.662994			-1.1119			-1.71149			-1.90001			0.291998						-1.18801			3.9483						3.3			0.8507			2.2934			-2.22909					0.710999			-2.265			-0.660995
	0.665009			-1.084			-1.70901			-1.89			0.294997						-1.1853			4.0019						3.30901			0.876396			2.3902			-2.2214					0.721008			-2.26201			-0.631989
	0.667007			-1.078			-1.7066			-1.86601			0.342001						-1.1844			4.0457						3.316			0.9403			2.4241			-2.204					0.762009			-2.2578			-0.627998
	0.683998			-1.076			-1.69019			-1.86301			0.3506						-1.18			4.059						3.332			0.942596			2.4292			-2.1989					0.77301			-2.24			-0.624008
	0.686005			-1.07201			-1.667			-1.828			0.374403						-1.176			4.15839						3.39999			1.023			2.4477			-2.1939					0.783997			-2.20099			-0.614006
	0.690994			-1.069			-1.6525			-1.802			0.389998						-1.1752			4.1649						3.40999			1.0625			2.4788			-2.1822					0.785995			-2.199			-0.612
	0.716995			-1.04599			-1.65			-1.79501			0.399001						-1.1707			4.1861						3.45299			1.0711			2.7391			-2.1732					0.804993			-2.1959			-0.609009
	0.737999			-1.04399			-1.6387			-1.79001			0.428999						-1.1683			4.2761						3.4784			1.0887			2.923			-2.1708					0.867981			-2.1887			-0.591003
	0.738998			-1.0358			-1.5841			-1.77499			0.442						-1.1637			4.3272						3.484			1.11			3.0702			-2.1223					0.88501			-2.1849			-0.589005
	0.781998			-1.02209			-1.5737			-1.774			0.442404						-1.162			4.3557						3.533			1.135			3.1797			-2.1159					0.8862			-2.1822			-0.587997
	0.786011			-1.022			-1.5543			-1.75099			0.450003						-1.1415			4.6226						3.539			1.1683			3.38604			-2.097					0.906982			-2.177			-0.586975
	0.787003			-0.993996			-1.554			-1.72			0.470999						-1.1378			4.6244						3.568			1.2392			3.4079			-2.0966					0.917999			-2.128			-0.584991
	0.821991			-0.978203			-1.53979			-1.71199			0.505003						-1.1364			5.0765						3.65601			1.258			3.458			-2.0899					0.92099			-2.1278			-0.570007
	0.878998			-0.978012			-1.5228			-1.703			0.527998						-1.13381			5.2121						3.71			1.2621			3.5793			-2.08121					0.927994			-2.12401			-0.544701
	0.880997			-0.977402			-1.4832			-1.664			0.5423						-1.12599			5.3306						3.75099			1.263			3.686			-2.0734					0.94101			-2.1208			-0.541992
	0.882996			-0.975998			-1.38071			-1.653			0.604697						-1.1222			5.3928						3.81801			1.274			3.7449			-2.0623					0.971001			-2.10941			-0.532013
	0.890999			-0.972			-1.3709			-1.651			0.609999						-1.1167			5.6826						3.834			1.27901			3.9875			-2.0592					0.981995			-2.104			-0.531998
	0.899994			-0.971603			-1.3425			-1.631			0.652998						-1.114			5.7852						3.867			1.3374			4.01916			-2.0575					0.983002			-2.104			-0.524994
	0.916992			-0.951004			-1.3223			-1.625			0.666502						-1.1103			5.8792						3.87399			1.355			4.0495			-2.0109					1.00201			-2.0991			-0.5236
	0.925995			-0.943001			-1.32			-1.623			0.673598						-1.1086			6.1725						3.917			1.37			4.307			-2.0082					1.01797			-2.089			-0.515015
	0.931			-0.913002			-1.3176			-1.595			0.693198						-1.1063			6.406						3.97701			1.44141			4.9045			-1.9947					1.026			-2.088			-0.513
	0.941002			-0.908997			-1.3049			-1.59201			0.7405						-1.0961			6.5518						3.995			1.4801			5.28113			-1.9782					1.03601			-2.087			-0.507996
	0.955994			-0.883003			-1.2554			-1.55301			0.768004						-1.0907			6.5675						3.9992			1.5143			5.8158			-1.973					1.03702			-2.04401			-0.505005
	0.959			-0.874001			-1.2467			-1.52501			0.772002						-1.0663			7.1598						4.002			1.578			6.3236			-1.9678					1.058			-2.0366			-0.501007
	0.987			-0.873009			-1.226			-1.517			0.824						-1.0628			7.2588						4.011			1.6121			7.71593			-1.9648					1.07602			-2.01599			-0.5
	0.987			-0.873001			-1.225			-1.509			0.892004						-1.0621			9.3538						4.144			1.6242			8.8152			-1.9633					1.09821			-1.9924			-0.496994
	1.03			-0.850998			-1.223			-1.506			0.897803						-1.04759			9.3715						4.1474			1.65			12.3308	Number of Fbs displaced up and down > 5um		-1.956					1.131			-1.992			-0.493099
	1.03299			-0.830803			-1.22231			-1.504			1.075						-1.0117			9.4242						4.168			1.7727		totla Fbs	138	13		-1.9248					1.13699			-1.9918			-0.490021
	1.05501			-0.819			-1.222			-1.466			1.309						-1.0097			12.748	Number of Fbs displaced up and down > 5um					4.194			1.853		% of Fbs displaced up and down > 5um	9.42029			-1.923					1.146			-1.9906			-0.486008
	1.07159			-0.778999			-1.195			-1.464			1.3437						-0.988599		totla Fbs	140	19					4.21899			1.85931						-1.9173					1.1586			-1.9865			-0.470993
	1.08499			-0.778			-1.1862			-1.451			1.3642						-0.962598		% of Fbs displaced up and down > 5um	13.5714						4.334			1.917						-1.8886					1.16101			-1.98			-0.46701
	1.097			-0.772003			-1.1744			-1.441			1.546						-0.957605									4.338			1.96						-1.8535					1.18701			-1.972			-0.4664
	1.21901			-0.756012			-1.145			-1.438			1.7547						-0.937303									4.455			2.0395						-1.8519					1.19299			-1.971			-0.456001
	1.224			-0.749001			-1.14439			-1.43001			1.7782						-0.9232									4.473			2.0406						-1.8497					1.19299			-1.96301			-0.455994
	1.256			-0.744995			-1.1339			-1.418			1.8848						-0.9181									4.535			2.1026						-1.8483					1.19299			-1.96199			-0.453995
	1.25699			-0.743698			-1.1339			-1.413			2.0466						-0.894399									4.63499			2.192						-1.834					1.213			-1.95502			-0.451004
	1.274			-0.718994			-1.1304			-1.41			2.142						-0.891401									4.699			2.203						-1.7976					1.25803			-1.94431			-0.441002
	1.292			-0.718002			-1.1188			-1.40599			2.158						-0.889997									4.71			2.3194						-1.7932					1.26801			-1.94			-0.438995
	1.30099			-0.7174			-1.1176			-1.4			2.16						-0.859605									4.757			2.3647						-1.7915					1.269			-1.9354			-0.434998
	1.31099			-0.71701			-1.1145			-1.38901			2.2468						-0.859602									4.762			2.6078						-1.7646					1.292			-1.92099			-0.406998
	1.312			-0.715996			-1.05711			-1.386			2.3251						-0.85									4.7689			2.7338						-1.7625					1.3036			-1.9086			-0.405975
	1.317			-0.703903			-1.0387			-1.362			2.3559						-0.85									4.79			2.735						-1.75291					1.31801			-1.90399			-0.399994
	1.349			-0.701996			-1.028			-1.351			2.3742						-0.85									4.79601			2.7575						-1.7522					1.328			-1.90201			-0.39502
	1.356			-0.699005			-1.0185			-1.34			2.386						-0.85									4.8112			2.8013						-1.7376					1.3502			-1.9016			-0.393982
	1.375			-0.684799			-1.0137			-1.326			2.391						-0.85									4.9676			2.8691						-1.7077					1.351			-1.90097			-0.3913
	1.39			-0.678009			-0.9916			-1.325			2.57						-0.837495									4.997			2.914						-1.7036					1.41			-1.90097			-0.37917
	1.396			-0.669106			-0.983795			-1.31			2.62						-0.827798									5			3.215						-1.6925					1.42801			-1.893			-0.376007
	1.40201			-0.664001			-0.982597			-1.30099			2.682						-0.825197									5			3.21899						-1.67351					1.42999			-1.89			-0.375977
	1.47501			-0.662003			-0.981003			-1.27899			2.7324						-0.818605									5.026			3.5698						-1.6667					1.464			-1.8793			-0.371979
	1.493			-0.658997			-0.972801			-1.23801			2.7797						-0.815508									5.08501			3.5853						-1.6596					1.474			-1.8589			-0.34568
	1.51599			-0.655991			-0.961403			-1.213			2.8008						-0.814298									5.2415			3.7002						-1.6421					1.474			-1.858			-0.344025
	1.587			-0.651001			-0.958794			-1.202			2.919						-0.807199									5.349			3.992						-1.641					1.478			-1.852			-0.341003
	1.59999			-0.638			-0.9543			-1.201			2.973						-0.794496									5.368			4.4866						-1.63					1.49301			-1.83099			-0.334015
	1.618			-0.635002			-0.952099			-1.173			3.0554						-0.793001									5.7333			4.657						-1.6238					1.51601			-1.8189			-0.332001
	1.64699			-0.634003			-0.934006			-1.17101			3.1019						-0.7814									5.992			4.677						-1.5958					1.569			-1.79999			-0.326996
	1.64999			-0.634003			-0.930801			-1.16699			3.132						-0.775697									6.7147			4.827						-1.5908					1.58798			-1.78101			-0.322998
	1.66301			-0.632004			-0.843803			-1.14301			3.21001						-0.764001									6.8447			5.7192						-1.5886					1.5941			-1.7761			-0.318699
	1.67601			-0.628998			-0.836998			-1.113			3.2406						-0.760599									7.116			5.8242						-1.5848					1.599			-1.77499			-0.315002
	1.73799			-0.624992			-0.825897			-1.05			3.3371						-0.745802									7.17201			6.0998						-1.5678					1.60199			-1.767			-0.313004
	1.768			-0.622993			-0.800201			-0.975998			3.398						-0.7367									7.656			6.1252						-1.5426					1.61899			-1.7668			-0.311996
	1.808			-0.619003			-0.788803			-0.969993			4.665	Number of Fbs displaced up and down > 5um					-0.726999									9.07	Number of Fbs displaced up and down > 5um		6.2864						-1.5356					1.63501			-1.759			-0.310974
	1.83299			-0.616997			-0.779999			-0.941993		totla Fbs	172	4					-0.721201								totla Fbs	172	15		6.3677						-1.5344					1.66899			-1.756			-0.294006
	1.841			-0.607002			-0.769005			-0.930008		% of Fbs displaced up and down > 5um	2.32558						-0.7073								% of Fbs displaced up and down > 5um	8.72093			6.6352						-1.497					1.69897			-1.74399			-0.287994
	1.89999			-0.607002			-0.747993			-0.917007									-0.7054												7.4625						-1.478					1.71201			-1.7345			-0.270996
	1.903			-0.606003			-0.735695			-0.905014									-0.6877												8.406						-1.4703					1.71402			-1.73401			-0.265991
	1.90599			-0.574005			-0.709999			-0.888									-0.682901												8.8184						-1.4287					1.7383			-1.72601			-0.2649
	1.91699			-0.552002			-0.700005			-0.88501									-0.6816												8.8206						-1.41749					1.763			-1.72			-0.259003
	1.922			-0.548996			-0.695496			-0.863006									-0.681402												10.2624						-1.4074					1.77798			-1.70599			-0.257996
	1.924			-0.545998			-0.695			-0.861999									-0.680498												14.4853	Number of Fbs displaced up and down > 5um					-1.3932					1.82397			-1.702			-0.244995
	2.09299			-0.541199			-0.694099			-0.847992									-0.679399											totla Fbs	180	24					-1.3889					1.82401			-1.7			-0.244003
	2.106			-0.533005			-0.669403			-0.830002									-0.6774											% of Fbs displaced up and down > 5um	13.3333						-1.3743					1.88501			-1.69998			-0.238983
	2.119			-0.529999			-0.656998			-0.830002									-0.6756																		-1.3718					1.89697			-1.69			-0.237991
	2.161			-0.514008			-0.652802			-0.820999									-0.674601																		-1.3633					1.925			-1.67902			-0.233994
	2.16501			-0.514			-0.652			-0.807007									-0.673799																		-1.3612					1.93503			-1.67099			-0.22699
	2.175			-0.510994			-0.629402			-0.807007									-0.631002																		-1.3569					2.061			-1.668			-0.225998
	2.303			-0.506004			-0.627693			-0.805008									-0.606699																		-1.3479					2.08603			-1.659			-0.219971
	2.332			-0.494995			-0.5979			-0.703995									-0.582903																		-1.3467					2.0955			-1.6573			-0.218994
	2.437			-0.487			-0.594498			-0.683998									-0.578603																		-1.3378					2.12			-1.65698			-0.20933
	2.439			-0.483002			-0.592697			-0.644005									-0.571001																		-1.3245					2.19098			-1.63			-0.20401
	2.461			-0.479004			-0.582001			-0.638									-0.558199																		-1.3226					2.19501			-1.62199			-0.195
	2.492			-0.4701			-0.580994			-0.603996									-0.553602																		-1.3027					2.198			-1.61501			-0.194
	2.509			-0.464798			-0.567001			-0.590706									-0.544397																		-1.2689					2.229			-1.60098			-0.192001
	2.52499			-0.463501			-0.562004			-0.590011									-0.536493																		-1.24					2.29399			-1.597			-0.188019
	2.555			-0.4431			-0.560997			-0.521003									-0.533598																		-1.2286					2.312			-1.59698			-0.188004
	2.59799			-0.431			-0.560902			-0.466003									-0.5128																		-1.2039					2.343			-1.59601			-0.182501
	2.685			-0.426003			-0.559006			-0.462997									-0.494699																		-1.1951					2.358			-1.58902			-0.177002
	2.76801			-0.426003			-0.548401			-0.399002									-0.489198																		-1.1911					2.36902			-1.5692			-0.175003
	2.86699			-0.417801			-0.547707			-0.395996									-0.476999																		-1.1741					2.42601			-1.561			-0.173004
	2.871			-0.414993			-0.518303			-0.392006									-0.466501																		-1.1654					2.4498			-1.55			-0.157104
	3.02299			-0.414001			-0.517006			-0.356994									-0.464597																		-1.1242					2.47			-1.54898			-0.147995
	3.028			-0.412003			-0.510193			-0.289001									-0.464399																		-1.121					2.474			-1.54881			-0.142197
	3.145			-0.410004			-0.492004			-0.257995									-0.4638																		-1.1199					2.58899			-1.54102			-0.140015
	3.208			-0.408997			-0.472298			-0.251999									-0.455																		-1.0996					2.62999			-1.5406			-0.128998
	3.26801			-0.408005			-0.468994			-0.240997									-0.441301																		-1.0943					2.63998			-1.539			-0.125977
	3.31099			-0.404007			-0.437195			-0.236999									-0.439401																		-1.09					2.78			-1.53			-0.121002
	3.354			-0.3918			-0.435997			-0.176002									-0.4316																		-1.0886					2.82201			-1.52502			-0.110992
	3.37			-0.389			-0.430199			-0.169006									-0.424299																		-1.0791					2.85602			-1.521			-0.110001
	3.407			-0.384003			-0.420097			-0.0960004									-0.416299																		-1.04941					2.86902			-1.51801			-0.10199
	3.43501			-0.384003			-0.412598			0.0540011									-0.408998																		-1.0358					2.88			-1.518			-0.0999908
	3.44699			-0.371002			-0.411003			0.145005									-0.400598																		-1.0177					3.00302			-1.51199			-0.0910034
	3.5448			-0.367996			-0.403496			0.190995									-0.3932																		-1.0054					3.028			-1.49298			-0.0901985
	3.55289			-0.367996			-0.376499			0.220001									-0.391698																		-1.003					3.06599			-1.4908			-0.0899963
	3.58299			-0.3675			-0.370003			0.220001									-0.3845																		-0.967498					3.0723			-1.48901			-0.0889893
	3.67599			-0.358002			-0.358002			0.270996									-0.370203																		-0.948302					3.237			-1.48801			-0.0849915
	3.72699			-0.356003			-0.349899			0.371002									-0.333704																		-0.935203					3.37201			-1.48799			-0.0825005
	3.937			-0.355995			-0.341003			0.380005									-0.327699																		-0.870902					3.461			-1.485			-0.0782013
	4.022			-0.354904			-0.340004			0.403694									-0.323907																		-0.865203					3.47202			-1.472			-0.071991
	4.062			-0.352005			-0.339096			0.412003									-0.323202																		-0.856299					3.778			-1.47099			-0.0639954
	4.237			-0.348999			-0.338997			0.477997									-0.317098																		-0.840903					3.879			-1.4544			-0.0620117
	4.244			-0.348999			-0.336006			0.543999									-0.3052																		-0.819503					3.936			-1.45			-0.0595932
	4.277			-0.347			-0.321404			0.546997									-0.301195																		-0.778598					4.17902			-1.4392			-0.0549927
	4.32199			-0.341995			-0.318001			0.552002									-0.250101																		-0.732101					4.23399			-1.43698			-0.0480042
	4.35201			-0.341003			-0.310997			0.552994									-0.248403																		-0.7145					4.332			-1.425			-0.04599
	4.455			-0.322998			-0.302002			0.556									-0.2306																		-0.676505					5.07001			-1.425			-0.0457993
	4.65099			-0.316002			-0.302002			0.600006									-0.215601																		-0.669299					5.90601			-1.41699			-0.0369949
	4.96799			-0.304001			-0.290802			0.623993									-0.212297																		-0.645202					6.07397			-1.4131			-0.0369873
	5.478			-0.297997			-0.275002			0.633995									-0.163301																		-0.620299					7.164			-1.408			-0.0319824
	6.196			-0.294998			-0.259003			0.649994									-0.115902																		-0.589004					7.22702			-1.39301			-0.0310059
	9.338	Number of Fbs displaced up and down > 5um		-0.287003			-0.245003			0.834									-0.0626007																		-0.567298					13.565	Number of Fbs displaced up and down > 5um		-1.3768			-0.0240021
totla Fbs	230	6		-0.285004			-0.2369			0.837006									-0.0573975																		-0.503402				totla Fbs	230	6		-1.35001			-0.0197983
% of Fbs displaced up and down > 5um	2.6087			-0.276993			-0.230797			0.850998									-0.0185982																		-0.430701				% of Fbs displaced up and down > 5um	2.6087			-1.3471			-0.0159912
				-0.275803			-0.225098			0.890007									-0.0152985																		-0.407699								-1.339			-0.0149994
				-0.271698			-0.219406			0.934006									0.0814041																		-0.396796								-1.333			-0.0127029
				-0.269005			-0.210999			0.972									0.163603																		-0.325801								-1.32799			-0.00700378
				-0.266006			-0.2061			0.988999									0.165404																		-0.249297								-1.314			-0.0041008
				-0.259003			-0.184296			1.064									0.188002																		-0.2331								-1.297			-0.0039978
				-0.249001			-0.167999			1.064									0.207899																		-0.172202								-1.29599			0
				-0.248901			-0.167397			1.08099									0.3031																		-0.1463								-1.29099			0.00100708
				-0.244995			-0.163506			1.08501									0.3361																		-0.104003								-1.276			0.0159912
				-0.242996			-0.1548			1.10699									0.340201																		-0.103801								-1.266			0.0230103
				-0.231995			-0.151199			1.14499									0.346999																		0.0576982								-1.25499			0.0269928
				-0.227997			-0.137497			1.14801									0.374701																		0.103501								-1.25101			0.0420227
				-0.225098			-0.131897			1.166									0.375204																		0.2007								-1.237			0.0499878
				-0.219994			-0.116402			1.209									0.4089																		0.290601								-1.237			0.0559998
				-0.219299			-0.110397			1.21301									0.5957																		0.437592								-1.23599			0.0599976
				-0.218994			-0.105202			1.227									0.6169																		0.467298								-1.23401			0.0620117
				-0.213005			-0.098999			1.233									0.692503																		0.800202								-1.231			0.0639954
				-0.209			-0.097702			1.24799									0.7041																		0.8327								-1.22202			0.0670013
				-0.208595			-0.0830002			1.254									0.706999																		0.847703								-1.2166			0.0680084
				-0.201996			-0.077301			1.32401									0.724997																		0.915097								-1.213			0.07901
				-0.199005			-0.0623016			1.33701									0.859999																		0.915399								-1.2029			0.0799866
				-0.192993			-0.0464935			1.347									0.923499																		0.951005								-1.20203			0.0929871
				-0.192001			-0.0429993			1.362									0.9583																		1.0352								-1.202			0.098999
				-0.180008			-0.0312996			1.371									1.0466																		1.0803								-1.19901			0.102997
				-0.168907			-0.0266953			1.37799									1.0972																		1.288								-1.1824			0.106995
				-0.167			-0.0173988			1.416									1.1452																		1.3026								-1.18			0.122601
				-0.164001			-0.0139999			1.41901									1.1649																		1.4207								-1.17999			0.125
				-0.158997			0.00979614			1.436									1.167																		1.43881								-1.1768			0.12999
				-0.149994			0.0189972			1.49799									1.1848																		1.4664								-1.17601			0.131012
				-0.139008			0.0190048			1.49901									1.2529																		1.7463								-1.168			0.150024
				-0.137001			0.0316925			1.51801									1.291																		1.9022								-1.16202			0.15799
				-0.133003			0.0354004			1.54599									1.395																		1.9897								-1.1473			0.178009
				-0.126999			0.0440979			1.55299									1.4462																		2.0924								-1.13898			0.178802
				-0.126999			0.0440979			1.578									1.503																		2.2609								-1.1384			0.190903
				-0.125999			0.0590057			1.578									1.7523																		2.7562								-1.127			0.190994
				-0.125992			0.0642014			1.64									1.811																		3.2092								-1.123			0.195007
				-0.125			0.0656967			1.69499									2.0748																		3.3887								-1.103			0.197006
				-0.116302			0.0759964			1.75099									2.1371																		4.2701								-1.09299			0.211601
				-0.113007			0.0764999			1.78799									2.1886																		4.612								-1.088			0.213989
				-0.111			0.0780945			1.793									2.2277																		5.8384								-1.088			0.223999
				-0.108002			0.0895004			1.79401									2.3347																		7.1527	Number of Fbs displaced up and down > 5um							-1.0785			0.231003
				-0.106796			0.0898056			1.799									2.4525																	totla Fbs	272	21							-1.063			0.237
				-0.106003			0.0910034			1.866									2.5135																	% of Fbs displaced up and down > 5um	7.72059								-1.06099			0.2372
				-0.101006			0.0942993			1.88699									2.5795																										-1.0584			0.238007
				-0.0939941			0.097702			2.103									2.761																										-1.056			0.238998
				-0.0880051			0.0979996			2.13499									2.8424																										-1.056			0.247993
				-0.0720062			0.100105			2.137									2.8602																										-1.052			0.248993
				-0.0429993			0.112099			2.18									2.8851																										-1.0487			0.251999
				-0.0360031			0.115997			2.19099									2.9009																										-1.047			0.252991
				-0.0350037			0.121994			2.293									3.12																										-1.03699			0.254013
				-0.0319977			0.128098			2.3505									3.2251																										-1.028			0.259979
				-0.0239944			0.128998			2.431									3.2626																										-1.02499			0.261002
				-0.0110016			0.132004			2.486									3.2995																										-1.02101			0.274994
				-0.00700378			0.138504			2.567									3.4127																										-1.0101			0.281998
				-0.00600433			0.139702			2.58099									3.4314																										-1.005			0.283005
				-0.00180054			0.144699			2.672									3.5352																										-0.986698			0.283997
				0			0.149002			2.711									3.5558																										-0.984009			0.289993
				0.0019989			0.156998			2.845									3.6482																										-0.9744			0.291992
				0.00401306			0.165604			2.92661									3.8366																										-0.973999			0.294998
				0.00500488			0.189003			3.19301									3.9519																										-0.9596			0.298996
				0.0160065			0.193703			3.231									3.9545																										-0.956699			0.302979
				0.0180054			0.197197			3.30899									3.98051																										-0.956024			0.306
				0.0200043			0.197296			3.31									4.0225																										-0.947998			0.322006
				0.0220032			0.202003			3.33501									4.0478																										-0.947006			0.322998
				0.0240021			0.207306			3.8204									4.0604																										-0.939899			0.335697
				0.0240021			0.210999			4.084									4.0757																										-0.929501			0.335999
				0.0249939			0.212799			4.35699									4.1016																										-0.928009			0.339996
				0.0250015			0.214798			4.492									4.15																										-0.912994			0.348801
				0.0279999			0.225494			8.21899									4.15																										-0.91098			0.352005
				0.0289917			0.251701			8.687									4.1507																										-0.909988			0.361008
				0.0310059			0.260605			9.528	Number of Fbs displaced up and down > 5um								4.18																										-0.907013			0.362
				0.0420074			0.261803		totla Fbs	302	11								4.2312																										-0.902008			0.380997
				0.0470123			0.2724		% of Fbs displaced up and down > 5um	3.64238									4.2446																										-0.891998			0.381701
				0.0483017			0.276299												4.3887																										-0.889008			0.387009
				0.0510025			0.293701												4.4113																										-0.886002			0.389999
				0.053009			0.298401												4.4305																										-0.884003			0.391991
				0.0549927			0.310097												4.434																										-0.882996			0.391998
				0.0570068			0.323006												4.4475																										-0.865997			0.397003
				0.0579987			0.3321												4.82709																										-0.860992			0.399994
				0.0609894			0.341995												4.8453																										-0.860992			0.402985
				0.0620041			0.3526												4.8515																										-0.859802			0.403198
				0.0620041			0.3545												5.0369																										-0.85701			0.404022
				0.0635986			0.386703												5.0399																										-0.8312			0.430008
				0.0709991			0.400505												5.1128																										-0.828995			0.436981
				0.0800018			0.403503												5.2228																										-0.828003			0.437012
				0.0820007			0.405998												5.2939																										-0.822998			0.439987
				0.0899963			0.415901												5.4155																										-0.822006			0.440002
				0.0910034			0.428398												5.4375																										-0.815002			0.443699
				0.0950012			0.442001												5.5148																										-0.812988			0.459991
				0.101997			0.450996												5.8392																										-0.7925			0.487
				0.110001			0.460396												7.231																										-0.787018			0.4944
				0.110992			0.460602												7.28																										-0.78299			0.496201
				0.112999			0.464005												7.8904																										-0.764984			0.503998
				0.114998			0.470596												8.12929																										-0.757004			0.504997
				0.132996			0.471794												8.618																										-0.756199			0.505997
				0.136002			0.474602												9.1944																										-0.748001			0.506012
				0.138			0.478798												9.6808																										-0.742004			0.506989
				0.140503			0.478798												12.5212	Number of Fbs displaced up and down > 5um																									-0.734009			0.508987
				0.143105			0.487396											totla Fbs	329	20																									-0.725998			0.51001
				0.145004			0.526703											% of Fbs displaced up and down > 5um	6.07903																										-0.7202			0.518997
				0.158005			0.532196																																						-0.717987			0.530991
				0.170013			0.542999																																						-0.712006			0.531998
				0.170204			0.543999																																						-0.705994			0.531998
				0.171005			0.557503																																						-0.705799			0.553799
				0.181			0.571396																																						-0.694			0.564095
				0.191601			0.596199																																						-0.694			0.582001
				0.204002			0.603302																																						-0.691994			0.582001
				0.205299			0.611603																																						-0.691986			0.589901
				0.210999			0.618004																																						-0.6856			0.604004
				0.218704			0.626602																																						-0.679001			0.667999
				0.223305			0.635002																																						-0.670998			0.668699
				0.225006			0.644997																																						-0.652008			0.679001
				0.226997			0.6483																																						-0.6443			0.701004
				0.227905			0.669701																																						-0.641998			0.728973
				0.238899			0.678001																																						-0.641499			0.735016
				0.25			0.678699																																						-0.640015			0.736
				0.250496			0.695007																																						-0.62999			0.738998
				0.250801			0.699898																																						-0.617981			0.748001
				0.250999			0.728195																																						-0.611008			0.758011
				0.251999			0.75																																						-0.604004			0.76001
				0.267998			0.756004																																						-0.587997			0.768501
				0.277			0.761002																																						-0.58699			0.799988
				0.292999			0.7743																																						-0.576801			0.865005
				0.293999			0.780998																																						-0.567001			0.867004
				0.297989			0.783005																																						-0.562901			0.878021
				0.303993			0.783997																																						-0.5369			0.882004
				0.313004			0.795502																																						-0.528			0.90054
				0.316002			0.8088																																						-0.503998			0.901001
				0.326996			0.849403																																						-0.496994			0.923981
				0.329002			0.852104																																						-0.487499			0.933014
				0.332001			0.862297																																						-0.485016			0.938004
				0.336601			0.877197																																						-0.453995			0.944992
				0.3386			0.916206																																						-0.451996			0.972
				0.338989			0.917198																																						-0.445			0.992294
				0.35199			0.932007																																						-0.442001			0.992401
				0.364006			0.948997																																						-0.424297			1.0387
				0.364998			0.958504																																						-0.414978			1.04399
				0.369003			0.972504																																						-0.402008			1.067
				0.373001			0.980293																																						-0.401001			1.10899
				0.404999			1.00079																																						-0.394012			1.133
				0.406998			1.0035																																						-0.389999			1.13699
				0.416992			1.0086																																						-0.384605			1.138
				0.417603			1.046																																						-0.372009			1.13901
				0.423203			1.0493																																						-0.371994			1.13901
				0.430008			1.0495																																						-0.371979			1.149
				0.445297			1.0516																																						-0.371002			1.1883
				0.460999			1.085																																						-0.359985			1.192
				0.462097			1.13																																						-0.353996			1.20099
				0.462997			1.1651																																						-0.343994			1.20102
				0.468002			1.2015																																						-0.338997			1.20103
				0.472			1.2708																																						-0.335007			1.2505
				0.473999			1.3038																																						-0.322998			1.29099
				0.484299			1.3082																																						-0.321991			1.3042
				0.485504			1.3199																																						-0.319			1.3255
				0.488998			1.3342																																						-0.307503			1.3334
				0.504196			1.4533																																						-0.306			1.41299
				0.514999			1.466																																						-0.285995			1.43799
				0.542			1.4744																																						-0.274017			1.4457
				0.554298			1.4777																																						-0.263			1.474
				0.564011			1.4908																																						-0.258972			1.47601
				0.57			1.5024																																						-0.257996			1.49699
				0.572998			1.5176																																						-0.257996			1.53802
				0.572998			1.5527																																						-0.251404			1.5762
				0.574005			1.5837																																						-0.244003			1.5817
				0.578003			1.6492																																						-0.241974			1.588
				0.5924			1.667																																						-0.235001			1.60397
				0.594002			1.68781																																						-0.231499			1.60901
				0.599991			1.7447																																						-0.2244			1.6181
				0.628006			1.8107																																						-0.210999			1.68198
				0.6287			1.961																																						-0.200989			1.69299
				0.636993			2.1823																																						-0.156006			1.70799
				0.650002			2.2274																																						-0.130981			1.735
				0.651001			2.4777																																						-0.127991			1.778
				0.658096			3.1498																																						-0.124008			1.7801
				0.692902			3.1654																																						-0.120003			1.95599
				0.695999			3.437																																						-0.110992			1.978
				0.709			3.631																																						-0.0993996			2.042
				0.709999			3.6893																																						-0.0960083			2.1381
				0.733002			4.10101																																						-0.0950012			2.25201
				0.736			4.1535																																						-0.0899963			2.366
				0.73999			4.739																																						-0.0859985			2.48401
				0.743004			5.1771																																						-0.072998			2.509
				0.743698			5.3098																																						-0.0680237			2.697
				0.744003			5.4476																																						-0.0669861			2.69901
				0.748993			5.452																																						-0.0609894			2.72198
				0.766006			5.837																																						-0.0599976			2.789
				0.785004			6.0279																																						-0.0540161			2.823
				0.791			6.03101																																						-0.0410156			2.93901
				0.807396			6.883																																						-0.0339966			3.183
				0.821999			7.588																																						-0.0299988			3.205
				0.822998			9.69601																																						-0.027401			3.41299
				0.828003			10.3171	Number of Fbs displaced up and down > 5um																																					-0.0249939			3.97299	Number of Fbs displaced up and down > 5um
				0.841202		totla Fbs	423	13																																					-0.0239868		totla Fbs	423	3
				0.841995		% of Fbs displaced up and down > 5um	3.07329																																						-0.0140076		% of Fbs displaced up and down > 5um	0.70922
				0.857399																																									-0.0110016
				0.875999																																									-0.00900269
				0.876999																																									0.0119934
				0.933998																																									0.0169983
				0.937004																																									0.0660095
				0.940399																																									0.111023
				0.955002																																									0.115005
				0.964005																																									0.134903
				0.972																																									0.167999
				0.990005																																									0.179993
				1.0178																																									0.207001
				1.035																																									0.243988
				1.052																																									0.2453
				1.055																																									0.269989
				1.059																																									0.271973
				1.06801																																									0.27301
				1.078																																									0.323502
				1.087																																									0.328697
				1.10001																																									0.334991
				1.105																																									0.343002
				1.1064																																									0.350998
				1.133																																									0.351013
				1.139																																									0.358002
				1.1566																																									0.362
				1.1728																																									0.363007
				1.173																																									0.384003
				1.1768																																									0.387302
				1.181																																									0.388
				1.18301																																									0.391022
				1.1895																																									0.391998
				1.1942																																									0.394012
				1.2555																																									0.402008
				1.302																																									0.4464
				1.3224																																									0.460999
				1.333																																									0.472992
				1.3416																																									0.481003
				1.37799																																									0.490997
				1.403																																									0.507996
				1.427																																									0.525902
				1.439																																									0.537994
				1.4469																																									0.552002
				1.45																																									0.569992
				1.456																																									0.570007
				1.461																																									0.593002
				1.4778																																									0.602997
				1.486																																									0.608978
				1.528																																									0.643005
				1.5301																																									0.675003
				1.55501																																									0.677002
				1.6167																																									0.690979
				1.63721																																									0.707001
				1.6732																																									0.707001
				1.727																																									0.709015
				1.738																																									0.714005
				1.744																																									0.723999
				1.754																																									0.732025
				1.762																																									0.756012
				1.8185																																									0.757019
				1.917																																									0.757799
				2.058																																									0.773299
				2.076																																									0.78299
				2.1579																																									0.806976
				2.1632																																									0.809006
				2.17601																																									0.813004
				2.199																																									0.821014
				2.231																																									0.830017
				2.2722																																									0.846008
				2.321																																									0.873001
				2.3443																																									0.877911
				2.434																																									0.888
				2.455																																									0.902008
				2.46001																																									0.914001
				2.4727																																									0.940002
				2.5106																																									0.946999
				2.6018																																									0.998001
				2.6052																																									1.005
				2.7013																																									1.00601
				2.729																																									1.07999
				2.853																																									1.08499
				2.8665																																									1.08698
				2.8726																																									1.091
				2.9549																																									1.103
				2.9963																																									1.112
				3.069																																									1.11697
				3.1296																																									1.125
				3.13																																									1.16299
				3.1452																																									1.168
				3.157																																									1.181
				3.1829																																									1.2497
				3.345																																									1.27798
				3.36																																									1.31799
				3.3784																																									1.328
				3.45801																																									1.33401
				3.493																																									1.34
				3.518																																									1.37201
				3.5516																																									1.452
				3.5578																																									1.453
				3.56999																																									1.46201
				3.6417																																									1.46698
				3.677																																									1.467
				3.703																																									1.47601
				3.7087																																									1.58701
				3.76839																																									1.67102
				3.872																																									1.67198
				3.8745																																									1.75601
				3.88901																																									1.82001
				3.895																																									1.84376
				3.96101																																									1.911
				4.004																																									1.94101
				4.019																																									1.95102
				4.0311																																									1.97
				4.13901																																									1.97299
				4.1461																																									1.97598
				4.1975																																									2.00897
				4.2274																																									2.04199
				4.308																																									2.04498
				4.3191																																									2.05399
				4.3258																																									2.17398
				4.493																																									2.19
				4.50629																																									2.19299
				4.5093																																									2.23401
				4.51401																																									2.29599
				4.582																																									2.32568
				4.8179																																									2.34315
				4.83																																									2.35602
				4.842																																									2.37201
				4.84399																																									2.42401
				4.9018																																									2.44299
				4.924																																									2.504
				4.96111																																									2.50699
				5																																									2.623
				5.05939																																									2.776
				5.39799																																									2.79199
				5.74599																																									3.015
				5.8916																																									3.0201
				5.9104																																									3.07701
				6.0642																																									3.12701
				6.231																																									3.3742
				6.231																																									3.44598
				6.3532																																									3.66898
				6.363																																									3.71997
				6.5497																																									3.86502
				6.716																																									3.918
				6.9136																																									4.1939
				7.635																																									4.578
				7.7949																																									4.63901
				8.3763																																									4.86099
				8.3862																																									5.09799
				8.77701																																									5.50299
				8.98251																																									5.6146
				9.1125																																									5.76199
				11.811																																									6.52499
				11.871																																									8.28799
				14.118																																									8.983
				15.027																																									11.048
				19.271																																									11.654
				21.2376	Number of Fbs displaced up and down > 5um																																								13.455	Number of Fbs displaced up and down > 5um
			totla Fbs	582	38																																							totla Fbs	582	27
			% of Fbs displaced up and down > 5um	6.52921																																								% of Fbs displaced up and down > 5um	4.63918
[truncated: 10 more columns]
