# Supplementary material for: Role of distinct fibroblast lineages and immune cells in dermal repair following UV radiation-induced tissue damage
Source: eLife journal article supplement (doi:10.7554/elife.71052), 2021-12-23
Supplement: supp [file elife-71052-supp-v1.zip › elife_poa_e71052_Figure_4_source_data_1.xlsx]

## Sheet: Figure 4C
Displacement in z direction of measured cells relative to their distance from the epidermis											Displacement in x direction of measured cells relative to their distance from the epidermis											Displacement in y direction of measured cells relative to their distance from the epidermis
Control			acUVB PI 1day			acUVB PI 4day					Control			acUVB PI 1day			acUVB PI 4day					Control			acUVB PI 1day			acUVB PI 4day
Displacement (um) in z	relative z position to epidermis (um)		Displacement (um) in z	relative z position to epidermis (um)		Displacement (um) in z	relative z position to epidermis (um)				Displacement in x (um)	relative z position to epidermis (um)		Displacement in x (um)	relative z position to epidermis (um)		Displacement in x (um)	relative z position to epidermis (um)				Displacement in y (um)	relative z position to epidermis (um)		Displacement in y (um)	relative z position to epidermis (um)		Displacement in y (um)	relative z position to epidermis (um)
0.0895	-56.5532		5.3306	0		4.997	-60.053				-1.4571	-56.5532		1.408	0		-5.8469	-60.053				0.116203	-56.5532		2.76999	0		-0.96198	-60.053
0.3526	-50.3404		4.6244	-6.3152		0.293999	-58.489				-1.8599	-50.3404		0.747015	-6.3152		1.7298	-58.489				-0.1887	-50.3404		3.03	-6.3152		2.3926	-58.489
-5.1874	-114.766		5.7852	-9.8903		3.3	-50.127				0.530991	-114.766		2.57398	-9.8903		0.910801	-50.127				5.1248	-114.766		1.80798	-9.8903		-0.2672	-50.127
-3.056	-104.397		5.3928	-10.7461		3.568	-54.461				1.13699	-104.397		-1.04702	-10.7461		-0.30099	-54.461				0.808899	-104.397		2.582	-10.7461		-2.9744	-54.461
-0.0174	-90.6679		6.5518	-10.8003		5.026	-53.586				0.738998	-90.6679		-0.58999	-10.8003		1.36701	-53.586				1.6692	-90.6679		0.996994	-10.8003		-1.6481	-53.586
-0.9521	-86.8607		0.896802	-10.9841		1.661	-47.946				0.298996	-86.8607		-0.32274	-10.9841		0.218998	-47.946				0.88717	-86.8607		0.628998	-10.9841		-1.6792	-47.946
-0.3499	-87.0183		3.8506	-11.1973		-0.192	-44.621				0.397003	-87.0183		0.558203	-11.1973		-0.104	-44.621				-3.1181	-87.0183		1.09	-11.1973		-2.3734	-44.621
-0.1164	-81.2647		5.2121	-11.613		1.027	-46.109				-0.705	-81.2647		-0.95789	-11.613		0.115994	-46.109				0.644402	-81.2647		2.72	-11.613		-1.59161	-46.109
-1.7677	-69.8318		5.6826	-11.9129		1.047	-33.827				0.882004	-69.8318		-2.182	-11.9129		4.03299	-33.827				0.9799	-69.8318		-5.03525	-11.9129		0.0814	-33.827
-0.5183	-69.6835		6.1725	-12.2207		3.1348	-76.7253				0.238998	-69.6835		-0.35299	-12.2207		-3.11	-76.7253				-0.3522	-69.6835		1.9517	-12.2207		3.47558	-76.7253
1.3038	-69.1564		4.1861	-12.6049		4.9676	-77.8271				-0.23799	-69.1564		-0.07299	-12.6049		5.529	-77.8271				0.577099	-69.1564		2.20299	-12.6049		4.2843	-77.8271
-2.4646	-64.8743		4.27611	-12.6533		4.1474	-69.2022				-1.257	-64.8743		1.13898	-12.6533		0.302998	-69.2022				0.9513	-64.8743		3.496	-12.6533		-2.8766	-69.2022
-0.5609	-65.653		3.3712	-13.5137		1.0604	-67.4336				-0.513	-65.653		0.570296	-13.5137		1.281	-67.4336				2.0984	-65.653		2.31799	-13.5137		-5.4185	-67.4336
-3.1384	-59.8912		4.0457	-14.0386		3.0396	-63.8252				-1.53601	-59.8912		-0.43501	-14.0386		-2.81001	-63.8252				1.3028	-59.8912		1.01001	-14.0386		2.0015	-63.8252
-0.1104	-61.8458		0.075597	-14.6004		0.548698	-62.8163				0.430008	-61.8458		3.0933	-14.6004		-0.565	-62.8163				0.802898	-61.8458		2.3017	-14.6004		-0.769	-62.8163
1.0086	-56.2536		9.3538	-14.7576		1.497	-57.28				-0.54199	-56.2536		5.08401	-14.7576		-1.62001	-57.28				-0.17941	-56.2536		28.061	-14.7576		-1.6067	-57.28
-1.69019	-49.614		12.748	-15.5573		1.316	-57.331				1.735	-49.614		3.20701	-15.5573		-0.27497	-57.331				3.97232	-49.614		-0.078	-15.5573		-1.1895	-57.331
-1.1339	-48.5876		7.1598	-15.6873		0.111	-54.145				0.322006	-48.5876		-2.11498	-15.6873		-4.31001	-54.145				1.5305	-48.5876		1.7023	-15.6873		7.0952	-54.145
0.276299	-49.9546		2.5757	-15.8019		4.79601	-53.575				-0.271	-49.9546		-0.299	-15.8019		2.148	-53.575				0.083401	-49.9546		-0.06	-15.8019		-2.754	-53.575
-3.0281	-89.0987		3.85769	-18.5078		1.282	-49.069				0.531998	-89.0987		-0.10499	-18.5078		-0.43699	-49.069				0.38975	-89.0987		0.565979	-18.5078		-2.8823	-49.069
-1.3425	-83.4364		4.3272	-18.9901		0.577003	-54.186				0.237	-83.4364		-0.19399	-18.9901		-0.66902	-54.186				1.4519	-83.4364		0.690979	-18.9901		-1.7999	-54.186
-1.3049	-78.0291		3.2459	-19.0836		2.22	-27.496				-0.175	-78.0291		0.914999	-19.0836		-0.90901	-27.496				1.4879	-78.0291		0.3547	-19.0836		-1.27	-27.496
-2.7494	-80.0396		3.2998	-19.2677		3.834	-44.486				0.867004	-80.0396		-1.19802	-19.2677		-0.092	-44.486				0.782799	-80.0396		4.92297	-19.2677		-1.644	-44.486
-1.9351	-74.9543		4.0019	-19.4106		-0.102	-58.764				-1.37199	-74.9543		-1.335	-19.4106		0.619	-58.764				-0.4769	-74.9543		3.03799	-19.4106		0.154999	-58.764
-0.9826	-70.8311		2.36029	-19.4287		3.71	-55.475				-0.776	-70.8311		-2.7598	-19.4287		-1.73701	-55.475				-0.3352	-70.8311		-4.3799	-19.4287		-0.49	-55.475
1.4744	-65.1002		0.145001	-19.5926		-0.282	-53.949				-3.427	-65.1002		7.0918	-19.5926		-0.356	-53.949				0.463902	-65.1002		4.9786	-19.5926		-2.209	-53.949
-1.7738	-64.2678		2.7601	-19.8438		5.08501	-53.422				0.274994	-64.2678		-6.229	-19.8438		-1.52101	-53.422				0.7481	-64.2678		3.0285	-19.8438		0.839005	-53.422
0.207306	-59.4647		-1.4333	-20.1905		1.271	-47.506				0.042023	-59.4647		1.81451	-20.1905		1.523	-47.506				-0.4329	-59.4647		3.649	-20.1905		-1.445	-47.506
-2.39771	-58.1692		2.883	-20.4381		-0.702	-49.479				-0.23898	-58.1692		1.1999	-20.4381		-1.061	-49.479				0.3787	-58.1692		2.77801	-20.4381		-0.81601	-49.479
-1.38071	-53.0712		0.3924	-20.5257		0.242004	-49.405				-2.153	-53.0712		2.92698	-20.5257		-2.49101	-49.405				2.624	-53.0712		1.2472	-20.5257		-4.56	-49.405
-2.5744	-54.7851		-2.2322	-20.9205		0.843994	-48.009				0.150024	-54.7851		2.16849	-20.9205		0.360005	-48.009				-1.1034	-54.7851		-2.258	-20.9205		-0.55501	-48.009
0.917198	-55.0294		3.2614	-21.1827		0.499001	-42.759				-1.15399	-55.0294		0.194006	-21.1827		1.485	-42.759				3.6654	-55.0294		-1.23801	-21.1827		0.567993	-42.759
0.100105	-51.2511		6.406	-21.2348		-2.993	-37.337				0.291992	-51.2511		0.838004	-21.2348		-3.712	-37.337				0.2826	-51.2511		2.205	-21.2348		-0.66299	-37.337
-0.1674	-51.6661		3.1023	-21.3307		4.002	-28.01				-1.036	-51.6661		-0.587	-21.3307		-0.21901	-28.01				0.279404	-51.6661		0.599495	-21.3307		1.118	-28.01
0.460396	-64.8821		2.4295	-21.7665		2.5877	-62.2983				-1.95099	-64.8821		2.06501	-21.7665		0.746998	-62.2983				-1.2672	-64.8821		-0.0617	-21.7665		1.487	-62.2983
0.128098	-65.1723		3.8248	-21.7809		2.413	-59.346				-0.612	-65.1723		0.138007	-21.7809		-0.886	-59.346				-0.1544	-65.1723		-1.2408	-21.7809		-0.828	-59.346
0.044098	-66.0798		2.44021	-21.8135		3.995	-59.782				1.95599	-66.0798		1.038	-21.8135		-0.48701	-59.782				-0.8288	-66.0798		-1.01401	-21.8135		-1.14299	-59.782
0.571396	-59.5733		2.6891	-21.8513		-0.267	-58.82				-0.03198	-59.5733		0.691016	-21.8513		-0.12199	-58.82				0.778698	-59.5733		-2.41679	-21.8513		-1.961	-58.82
0.261803	-55.7491		9.4242	-22.7565		0.396996	-43.76				0.015991	-55.7491		8.029	-22.7565		0.414998	-43.76				-0.5076	-55.7491		0.323204	-22.7565		0.309998	-43.76
0.251701	-48.3564		3.5298	-22.9502		3.272	-43.968				-1.513	-48.3564		0.022986	-22.9502		1.84601	-43.968				0.4818	-48.3564		2.19901	-22.9502		0.993996	-43.968
0.400505	-50.9356		1.4359	-23.1362		1.538	-43.416				-0.10199	-50.9356		0.117987	-23.1362		-1.206	-43.416				-0.4958	-50.9356		2.76398	-23.1362		-0.34	-43.416
-0.7888	-67.0444		7.2588	-23.8104		3.484	-43.343				0.211601	-67.0444		3.003	-23.8104		-0.673	-43.343				1.026	-67.0444		5.4895	-23.8104		-0.437	-43.343
1.7447	-64.8427		3.2418	-24.1176		0.970001	-38.559				-0.61401	-64.8427		-0.51599	-24.1176		-0.666	-38.559				1.994	-64.8427		1.36501	-24.1176		-0.90401	-38.559
1.8107	-49.6992		-0.3318	-24.1699		2.86199	-34.091				-0.20933	-49.6992		1.9286	-24.1699		0.532002	-34.091				0.832993	-49.6992		2.01599	-24.1699		0.485001	-34.091
-0.3765	-80.433		3.1358	-24.2396		1.054	-27.736				-0.589	-80.433		-1.621	-24.2396		0.261006	-27.736				-0.542	-80.433		-0.8221	-24.2396		0.79599	-27.736
1.5527	-64.4405		-0.7989	-24.3178		2.522	-30.747				0.283005	-64.4405		-0.462	-24.3178		1.09099	-30.747				0.151001	-64.4405		6.926	-24.3178		-0.097	-30.747
-1.6525	-67.5914		2.111	-24.4763		-0.744	-20.932				0.067001	-67.5914		2.48301	-24.4763		-1.67903	-20.932				0.517998	-67.5914		-0.4018	-24.4763		-1.994	-20.932
-3.1146	-65.0018		1.9336	-24.5131		4.144	-49.841				2.509	-65.0018		-0.61498	-24.5131		1.68502	-49.841				0.419998	-65.0018		-0.40772	-24.5131		-0.599	-49.841
-1.0185	-65.2893		4.15839	-24.8343		2.00501	-48.49				0.252991	-65.2893		0.398993	-24.8343		0.284993	-48.49				-0.95	-65.2893		1.152	-24.8343		-1.032	-48.49
1.3342	-59.7331		0.193997	-25.0529		1.999	-45.834				0.289993	-59.7331		-2.2513	-25.0529		1.31102	-45.834				-0.826	-59.7331		0.783997	-25.0529		-0.998	-45.834
-2.612	-54.609		3.9483	-25.0899		2.127	-45.67				1.978	-54.609		1.00901	-25.0899		0.94701	-45.67				1.433	-54.609		2.40799	-25.0899		-2.85701	-45.67
0.214798	-48.187		5.0765	-25.1087		2.729	-40.424				0.506989	-48.187		-1.137	-25.1087		0.746998	-40.424				1.05499	-48.187		0.722	-25.1087		-1.594	-40.424
-0.1548	-50.7757		3.2833	-25.2636		1.01	-40.92				0.503998	-50.7757		0.926001	-25.2636		-1.53999	-40.92				0.493011	-50.7757		4.55199	-25.2636		-0.45799	-40.92
-1.5841	-49.1522		3.3216	-25.479		4.699	-33.45				-0.674	-49.1522		-1.2816	-25.479		0.560017	-33.45				0.699997	-49.1522		0.50499	-25.479		-1.179	-33.45
-2.5008	-74.5191		2.2561	-25.5071		2.011	-30.309				1.474	-74.5191		1.533	-25.5071		0.266987	-30.309				2.01199	-74.5191		-0.015	-25.5071		-1.631	-30.309
-3.162	-64.9326		-0.4816	-25.5978		0.936996	-27.758				1.60397	-64.9326		0.922003	-25.5978		-1.38099	-27.758				1.647	-64.9326		-0.79401	-25.5978		-1.49101	-27.758
1.2015	-60.0905		1.7212	-25.5978		3.332	-29.726				0.728973	-60.0905		-2.69601	-25.5978		-0.21702	-29.726				-0.588	-60.0905		0.310013	-25.5978		-1.89801	-29.726
-2.8041	-54.0738		1.1229	-25.9018		2.321	-44.459				-1.04398	-54.0738		-1.37301	-25.9018		1.53701	-44.459				1.991	-54.0738		0.838989	-25.9018		2.231	-44.459
0.0765	-51.1132		2.2922	-25.904		0.508003	-42.833				-5.27399	-51.1132		-0.3183	-25.904		-1.581	-42.833				-2.981	-51.1132		1.82199	-25.904		-2.11099	-42.833
-0.6528	-50.9382		1.9462	-25.9193		0.610001	-38.908				2.25201	-50.9382		0.092993	-25.9193		0.298001	-38.908				-3.054	-50.9382		-0.4417	-25.9193		0.006989	-38.908
0.644997	-50.6878		1.479	-25.9561		1.151	-32.034				1.70799	-50.6878		-0.57801	-25.9561		0.034001	-32.034				0.235001	-50.6878		-0.49001	-25.9561		-0.049	-32.034
-2.524	-64.7686		1.1774	-26.3323		3.101	-32.525				-0.01599	-64.7686		-0.24201	-26.3323		0.937993	-32.525				0.804001	-64.7686		0.421898	-26.3323		0.138	-32.525
-2.8438	-65.1365		3.7892	-29.1319		2.354	-32.046				-0.905	-65.1365		-0.16599	-29.1319		0.508	-32.046				1.173	-65.1365		2.0475	-29.1319		0.891998	-32.046
-1.9768	-62.0865		-0.299	-30.0475		3.40999	-25.416				0.302979	-62.0865		2.0649	-30.0475		0.759999	-25.416				0.25	-62.0865		1.254	-30.0475		0.941986	-25.416
-0.04649	-55.6643		1.6619	-30.1963		2.945	-57.039				-1.241	-55.6643		0.717402	-30.1963		0.313984	-57.039				-1.54	-55.6643		1.849	-30.1963		-0.408	-57.039
-0.4723	-55.4356		2.738	-30.35		-0.806	-54.63				-1.237	-55.4356		2.35502	-30.35		2.15999	-54.63				0.768005	-55.4356		0.754997	-30.35		-1.90002	-54.63
-2.75661	-49.837		2.4883	-30.3526		0.428001	-48.075				-1.384	-49.837		-2.591	-30.3526		-0.128	-48.075				0.139008	-49.837		0.314098	-30.3526		-0.33	-48.075
0.526703	-50.846		1.8664	-30.5163		0.490997	-49.01				-0.0127	-50.846		1.423	-30.5163		-0.606	-49.01				0.404999	-50.846		1.57399	-30.5163		-0.57199	-49.01
0.557503	-49.987		0.926999	-30.8365		3.22099	-45.549				0.261002	-49.987		0.646979	-30.8365		-1.229	-45.549				0.595001	-49.987		2.78201	-30.8365		-0.06601	-45.549
-0.4126	-51.9187		2.2346	-30.8941		1.59	-37.539				0.768501	-51.9187		0.74201	-30.8941		-0.66499	-37.539				1.16901	-51.9187		0.104101	-30.8941		-0.828	-37.539
-1.9569	-70.3137		4.059	-31.3119		1.06799	-32.989				0.505997	-70.3137		-0.6435	-31.3119		-0.46699	-32.989				0.651978	-70.3137		0.6471	-31.3119		0.209015	-32.989
-0.1052	-71.2114		2.2264	-31.8939		4.762	-34.765				0.380997	-71.2114		-4.92599	-31.8939		-1.78498	-34.765				0.144012	-71.2114		1.8383	-31.8939		0.459991	-34.765
-3.0608	-70.367		-2.2434	-32.2226		2.451	-26.536				-0.024	-70.367		1.9	-32.2226		-0.16603	-26.536				0.992004	-70.367		-2.44598	-32.2226		-0.638	-26.536
-2.7483	-60.1233		4.3557	-33.8687		3.65601	-30.048				0.248993	-60.1233		0.616995	-33.8687		0.879994	-30.048				0.541016	-60.1233		-0.946	-33.8687		2.006	-30.048
-2.1065	-61.5286		5.8792	-34.4595		3.052	-28.57				-0.49699	-61.5286		1.73499	-34.4595		-0.28202	-28.57				0.380981	-61.5286		0.0562	-34.4595		-0.55099	-28.57
-3.3022	-54.8314		-0.6418	-34.6222		2.84401	-22.227				0.933014	-54.8314		1.7408	-34.6222		-0.693	-22.227				3.68201	-54.8314		2.47	-34.6222		-1.59003	-22.227
-1.1188	-57.4726		-1.0598	-35.1629		4.168	-9.06999				0.531998	-57.4726		1.622	-35.1629		-0.20301	-9.06999				0.55101	-57.4726		0.408997	-35.1629		0.324005	-9.06999
-0.562	-56.337		1.0869	-35.2599		1.439	-42.318				-0.09999	-56.337		-0.48499	-35.2599		-0.47499	-42.318				1.43799	-56.337		0.626699	-35.2599		-0.922	-42.318
-1.05711	-55.5059		-1.0785	-35.5218		2.619	-35.251				0.068008	-55.5059		-0.38699	-35.5218		1.97799	-35.251				1.758	-55.5059		2.07199	-35.5218		-0.806	-35.251
0.442001	-51.6601		2.5247	-35.5702		4.194	-28.82				1.067	-51.6601		1.56602	-35.5702		-2.73899	-28.82				1.81601	-51.6601		1.03001	-35.5702		-4.411	-28.82
-2.8923	-49.7519		-3.1439	-35.7441		3.017	-30.081				-0.81	-49.7519		0.645003	-35.7441		1.86501	-30.081				1.26099	-49.7519		-1.21599	-35.7441		-1.49701	-30.081
0.849403	-49.1493		2.5903	-35.9245		1.384	-27.374				0.504997	-49.1493		0.047003	-35.9245		-2.09001	-27.374				1.13	-49.1493		3.34302	-35.9245		-1.86301	-27.374
3.6893	-66.8593		1.8533	-36.4553		2.998	-25.157				3.41299	-66.8593		-1.92098	-36.4553		0.306996	-25.157				3.84599	-66.8593		3.33301	-36.4553		-1.42099	-25.157
-5.4211	-63.2027		2.033	-37.1519		0.798996	-42.953				-3.21901	-63.2027		1.88801	-37.1519		-3.65219	-42.953				2.04398	-63.2027		2.944	-37.1519		-1.32101	-42.953
-3.2113	-55.4501		0.866299	-38.868		3.10001	-33.641				0.195007	-55.4501		1.0067	-38.868		-1.493	-33.641				1.14301	-55.4501		1.284	-38.868		-0.52701	-33.641
-2.752	-55.0193		0.154301	-38.9515		1.076	-32.638				0.092987	-55.0193		1.74998	-38.9515		0.323399	-32.638				1.13	-55.0193		-0.6244	-38.9515		-0.59399	-32.638
-0.9916	-55.3597		2.6182	-39.4224		1.343	-33.393				-1.18901	-55.3597		-1.962	-39.4224		0.657498	-33.393				-0.241	-55.3597		0.755001	-39.4224		0.451019	-33.393
1.6878	-53.6756		-1.2879	-39.4357		2.489	-28.107				-0.39999	-53.6756		2.48699	-39.4357		-1.7551	-28.107				0.624023	-53.6756		0.843018	-39.4357		0.705017	-28.107
-1.53979	-53.8219		-5.2349	-39.933		2.604	-30.205				-0.45599	-53.8219		1.788	-39.933		-0.2094	-30.205				0.392975	-53.8219		2.50998	-39.933		1.63901	-30.205
-2.4534	-49.4644		4.6226	-40.1502		1.42599	-17.168				-1.92	-49.4644		-0.0294	-40.1502		1.1298	-17.168				-0.293	-49.4644		2.4643	-40.1502		-0.41702	-17.168
-1.4832	-50.8568		4.1649	-40.3423		3.299	-50.083				-0.407	-50.8568		0.054999	-40.3423		-1.109	-50.083				1.18399	-50.8568		1.27801	-40.3423		-0.35602	-50.083
-2.4401	-59.2631		2.815	-40.593		0.755005	-39.683				-2.939	-59.2631		4.19599	-40.593		0.278004	-39.683				2.556	-59.2631		0.944401	-40.593		-0.702	-39.683
5.4476	-56.1146		2.384	-40.7026		3.97701	-30.08				2.72199	-56.1146		0.088004	-40.7026		-2.041	-30.08				-0.67999	-56.1146		-4.8154	-40.7026		-2.203	-30.08
-0.0623	-51.0532		3.1846	-40.7811		3.39999	-28.808				1.53802	-51.0532		2.20899	-40.7811		-0.31501	-28.808				-0.49501	-51.0532		-1.50601	-40.7811		2.73801	-28.808
-2.1714	-50.97		2.487	-40.8497		3.539	-25.491				0.306	-50.97		-0.12899	-40.8497		-0.483	-25.491				0.901993	-50.97		1.50803	-40.8497		-0.76999	-25.491
-2.0637	-48.3845		1.8738	-40.9081		3.30901	-39.186				0.283997	-48.3845		-1.11801	-40.9081		0.231984	-39.186				0.639999	-48.3845		0.9095	-40.9081		0.295013	-39.186
-2.6089	-59.9064		-2.8318	-41.1017		1.16699	-23.032				-0.3913	-59.9064		-0.001	-41.1017		1.14501	-23.032				2.099	-59.9064		-0.1899	-41.1017		-4.66	-23.032
-2.4875	-58.7487		1.7807	-41.333		1.33901	-25.124				0.553799	-58.7487		0.029974	-41.333		0.703999	-25.124				1.70398	-58.7487		1.138	-41.333		1.155	-25.124
-1.71149	-49.1362		0.219403	-42.3265		3.87399	-14.838				-0.0198	-49.1362		-1.48501	-42.3265		-0.029	-14.838				1.03101	-49.1362		0.720001	-42.3265		0.033997	-14.838
-1.1145	-51.115		0.487397	-42.6055		3.867	-24.802				0.190903	-51.115		-1.592	-42.6055		0.73	-24.802				1.258	-51.115		-1.5204	-42.6055		-1.03601	-24.802
-2.9067	-54.8645		-1.2474	-42.7421		2.174	-22.906				0.439987	-54.8645		0.299994	-42.7421		-0.60899	-22.906				0.886017	-54.8645		-0.549	-42.7421		-1.16599	-22.906
0.078094	-56.2419		0.760102	-43.4146		4.535	-19.828				-0.795	-56.2419		0.513998	-43.4146		0.705983	-19.828				1.32999	-56.2419		0.410004	-43.4146		2.48599	-19.828
-1.5737	-50.6485		1.1937	-43.5238		4.21899	-18.627				-1.442	-50.6485		0.120001	-43.5238		-0.412	-18.627				0.994995	-50.6485		1.28	-43.5238		-0.97501	-18.627
-2.475	-48.7057		-1.6128	-43.7174		2.73401	-14.671				0.701004	-48.7057		-1.00099	-43.7174		0.516011	-14.671				1.25601	-48.7057		3.08899	-43.7174		-0.87201	-14.671
-1.1304	-70.8469		2.0719	-44.0124		3.81801	-24.033				0.389999	-70.8469		-0.71301	-44.0124		0.468304	-24.033				0.830017	-70.8469		0.530998	-44.0124		4.258	-24.033
-3.3863	-69.262		2.6524	-44.4419		4.334	-26.856				0.459991	-69.262		0.200995	-44.4419		0.424977	-26.856				0.796997	-69.262		-0.6961	-44.4419		3.32101	-26.856
-3.525	-69.0251		-1.1032	-44.9313		3.45299	0				-1.65701	-69.0251		-1.94	-44.9313		0.987019	0				1.758	-69.0251		0.321991	-44.9313		-0.112	0
-3.00211	-60.366		2.5027	-45.014		2.053	-36.236				-0.81302	-60.366		0.012	-45.014		-0.31901	-36.236				0.845001	-60.366		-0.05599	-45.014		-1.39099	-36.236
-4.4288	-54.9147		-1.4812	-45.1545		3.533	-43.777				0.938004	-54.9147		1.443	-45.1545		0.091404	-43.777				-0.26099	-54.9147		-0.146	-45.1545		-0.267	-43.777
0.225494	-55.7475		1.7323	-45.1751		-8.586	-42.335				-0.707	-55.7475		-0.591	-45.1751		2.49953	-42.335				2.92899	-55.7475		0.149002	-45.1751		1.33899	-42.335
-2.10889	-49.2305		1.4406	-45.3044		4.63499	-3.32199				0.15799	-49.2305		-1.22601	-45.3044		-0.54902	-3.32199				1.595	-49.2305		4.26401	-45.3044		-1.32498	-3.32199
-2.47771	-53.643		-1.796	-45.4462		4.455	-45.837				-0.936	-53.643		0.163	-45.4462		0.448994	-45.837				0.666016	-53.643		-8.207	-45.4462		-2.61401	-45.837
0.386703	-50.1772		2.3751	-45.5605		3.292	-47.378				-0.72598	-50.1772		-1.44699	-45.5605		0.9031	-47.378				0.177979	-50.1772		0	-45.5605		0.983002	-47.378
1.2708	-39.7048		-0.2108	-45.7914		4.79	-42.902				-2.39021	-39.7048		-2.89901	-45.7914		1.01702	-42.902				3.2014	-39.7048		-0.3107	-45.7914		0	-42.902
2.1823	-40.9881		-0.3791	-45.8252		4.338	-18.693				1.20103	-40.9881		0.217993	-45.8252		-0.81401	-18.693				3.8584	-40.9881		0.098999	-45.8252		-4.11502	-18.693
0.603302	-40.0847		0.987099	-46.1158		2.326	-56.526				-0.37917	-40.0847		-1.52	-46.1158		0.593983	-56.526				0.813805	-40.0847		0.378006	-46.1158		-1.5112	-56.526
0.7743	-34.8714		1.1586	-46.2087		0.115494	-70.4921				0.348801	-34.8714		-0.615	-46.2087		1.71599	-70.4921				0.198	-34.8714		-0.63101	-46.2087		-3.97501	-70.4921
1.00079	-35.0973		-2.5904	-46.3925		-0.35399	-14.429				0.4944	-35.0973		2.909	-46.3925		0.068989	-14.429				0.669899	-35.0973		-0.0761	-46.3925		0.807983	-14.429
-0.1375	-36.3514		-0.0002	-47.3495		0.102997	-53.79				0.381701	-36.3514		-2.016	-47.3495		-0.6346	-53.79				-1.2383	-36.3514		-1.5425	-47.3495		0.8302	-53.79
1.046	-28.623		0.789399	-48.1383		2.05499	-32.819				0.122601	-28.623		-0.10099	-48.1383		-0.26439	-32.819				0.775799	-28.623		-0.54602	-48.1383		-0.487	-32.819
0.852104	-29.4609		-1.5241	-48.359		7.656	-37.933				-0.1422	-29.4609		-1.15701	-48.359		-3.2516	-37.933				0.698997	-29.4609		0.905998	-48.359		3.429	-37.933
0.139702	-46.6507		0.020901	-48.7761		2.1753	-72.8118				-0.015	-46.6507		-1.41699	-48.7761		0.0695	-72.8118				-0.3518	-46.6507		2.6037	-48.7761		2.638	-72.8118
1.0495	-44.9792		9.3715	-49.5651		7.116	-58.667				-0.11	-44.9792		-1.01302	-49.5651		-0.7608	-58.667				0.238998	-44.9792		-0.8914	-49.5651		-1.63699	-58.667
0.197296	-46.6972		2.1776	-51.3179		1.056	-66.8449				0.049988	-46.6972		-0.70898	-51.3179		2.5602	-66.8449				-0.4615	-46.6972		0.959	-51.3179		4.14999	-66.8449
-3.79269	-43.8863		0.920998	-51.3301		1.255	-67.3385				-1.662	-43.8863		1.58399	-51.3301		1.3223	-67.3385				1.3596	-43.8863		1.039	-51.3301		-1.661	-67.3385
-0.1843	-39.9468		0.993398	-51.4209		0.100998	-58.564				-0.47099	-39.9468		-0.039	-51.4209		1.53301	-58.564				1.0708	-39.9468		0.13501	-51.4209		-1.8415	-58.564
-0.561	-38.2889		6.5675	-51.5803		4.8112	-73.9658				0.506012	-38.2889		-1.57499	-51.5803		1.95101	-73.9658				0.012001	-38.2889		0.434021	-51.5803		-3.1559	-73.9658
1.5024	-39.6657		-8.7229	-51.8707		-2.1794	-80.9564				-1.039	-39.6657		-0.18099	-51.8707		-1.48101	-80.9564				-0.043	-39.6657		-0.948	-51.8707		-2.1469	-80.9564
0.009796	-40.518		-0.0458	-52.9136		-2.0172	-78.9015				-0.188	-40.518		-1.11599	-52.9136		2.36101	-78.9015				3.6322	-40.518		0.800995	-52.9136		0.131302	-78.9015
0.089806	-33.3452		0.0038	-54.3506		1.65199	-24.799				0.748001	-33.3452		1.031	-54.3506		-1.27897	-24.799				0.5312	-33.3452		0.554016	-54.3506		-1.59299	-24.799
0.972504	-35.8575		-0.812	-54.6171		3.75099	-28.282				-0.312	-35.8575		-0.05901	-54.6171		2.273	-28.282				-0.0775	-35.8575		1.7052	-54.6171		-0.46201	-28.282
0.260605	-32.4824		-0.9595	-54.8043		3.316	-40.461				-0.588	-32.4824		-0.00601	-54.8043		-1.083	-40.461				-0.2485	-32.4824		0.768982	-54.8043		0.826996	-40.461
0.298401	-32.4796		0.835698	-55.2218		-0.694	-55.14				-0.341	-32.4796		1.4372	-55.2218		0.787007	-55.14				-0.3232	-32.4796		3.5375	-55.2218		0	-55.14
0.064201	-45.8206		-3.144	-56.0139		3.1813	-62.8107				-0.51501	-45.8206		-2.251	-56.0139		-2.37301	-62.8107				0.2052	-45.8206		2.438	-56.0139		-0.83099	-62.8107
-0.78	-43.5604		-0.468	-58.8929		9.07	-48.707				-1.79901	-43.5604		0.569006	-58.8929		0.828007	-48.707				-0.432	-43.5604		-0.12399	-58.8929		-2.41101	-48.707
-0.3214	-46.4707		3.7655	-59.3823		5.7333	-68.0437				-0.332	-46.4707		2.01699	-59.3823		3.60199	-68.0437				0.536003	-46.4707		2.00699	-59.3823		1.09	-68.0437
0.115997	-40.8737		2.812	-59.5152		4.473	-65.2879				-1.983	-40.8737		-2.21301	-59.5152		0.577	-65.2879				0.302	-40.8737		-0.5412	-59.5152		0.027985	-65.2879
-1.7482	-38.6198		-0.3908	-59.5936		1.3653	-86.0572				-1.153	-38.6198		-2.38799	-59.5936		0.0789	-86.0572				1.3248	-38.6198		1.78198	-59.5936		-1.09399	-86.0572
0.031693	-41.0954		0.138701	-72.5951		5.349	-58.278				0.259979	-41.0954		-1.44299	-72.5951		-1.789	-58.278				-0.1554	-41.0954		1.061	-72.5951		0	-58.278
0.2724	-36.5923		-0.207	-79.2109		3.4784	-75.2986				-0.60901	-36.5923		-0.71603	-79.2109		-1.139	-75.2986				3.95752	-36.5923		-5.899	-79.2109		-1.765	-75.2986
0.415901	-36.4237					0.803993	-59.216				-1.586	-36.4237					-3.359	-59.216				-1.4	-36.4237					-3.321	-59.216
0.699898	-32.5441					-1.26611	-75.674				-0.192	-32.5441					-8.089	-75.674				-0.1991	-32.5441					-4.50101	-75.674
-0.1512	-31.3842					2.827	-48.531				0.12999	-31.3842					0.722004	-48.531				-0.5779	-31.3842					-5.25699	-48.531
-0.8438	-43.6675					2.202	-58.131				-1.435	-43.6675					-1.27	-58.131				0.652	-43.6675					-3.32101	-58.131
-0.43719	-38.6175					3.917	-45.372				0.923981	-38.6175					2.354	-45.372				4.02342	-38.6175					0.830994	-45.372
-0.6694	-32.1584					4.71	-58.777				-0.177	-32.1584					0.156003	-58.777				0.011002	-32.1584					2.272	-58.777
-1.70901	-22.24					4.011	-43.777				1.133	-22.24					-0.0303	-43.777				-0.2555	-22.24					-0.414	-43.777
0.138504	-46.8142					0.403	-44.566				-0.05959	-46.8142					-1.96	-44.566				0.25499	-46.8142					0.119995	-44.566
0.669701	-45.4455					7.17201	-20.511				0.178802	-45.4455					-1.59101	-20.511				0.052002	-45.4455					3.42599	-20.511
1.4533	-38.4618					1.232	-48.735				1.5817	-38.4618					0.899006	-48.735				0.117996	-38.4618					1.099	-48.735
3.631	-37.2746					0.823997	-37.715				-3.4985	-37.2746					-4.18101	-37.715				1.708	-37.2746					-0.39099	-37.715
0.8088	-36.161					5.992	-31.042				-0.628	-36.161					1.73	-31.042				0.137001	-36.161					-0.61499	-31.042
0.611603	-29.0654					3.9992	-64.7778				-0.5236	-29.0654					2.018	-64.7778				0.346001	-29.0654					0.753998	-64.7778
-0.0773	-28.4603					-3.3248	-78.4219				2.1381	-28.4603					2.5603	-78.4219				0.687012	-28.4603					-1.478	-78.4219
6.03101	-25.627					-0.41199	-49.047				-2.43408	-25.627					-3.29701	-49.047				-0.048	-25.627					-2.491	-49.047
0.075996	-24.55					0.566002	-49.918				-1.9951	-24.55					-5.834	-49.918				1.064	-24.55					4.15198	-49.918
0.780998	-21.65					1.251	-50.398				-0.34568	-21.65					0.746998	-50.398				0.344994	-21.65					2.85701	-50.398
0.756004	-21.457					-3.7868	-70.0977				-0.7667	-21.457					-4.08201	-70.0977				1.998	-21.457					-2.9875	-70.0977
0.948997	-17.312					1.154	-47.623				1.5762	-17.312					0.505009	-47.623				-0.791	-17.312					0.235001	-47.623
0.478798	-45.0755					2.4572	-61.3198				-0.505	-45.0755					-3.397	-61.3198				-0.131	-45.0755					-0.073	-61.3198
1.0493	-44.2926					-3.025	-46.802				1.10899	-44.2926					-0.762	-46.802				0.259003	-44.2926					0.316986	-46.802
-0.302	-46.6651					6.7147	-92.0623				-0.29401	-46.6651					0.689015	-92.0623				0.701996	-46.6651					-4.4306	-92.0623
-0.2369	-45.2469					4.7689	-64.0081				-0.03699	-45.2469					0.448994	-64.0081				-0.147	-45.2469					-0.03801	-64.0081
-0.4201	-38.2501					0.3433	-79.3378				0.437012	-38.2501					-0.4103	-79.3378				0.931	-38.2501					-2.4908	-79.3378
0.980293	-42.101					5.2415	-63.5355				-0.591	-42.101					-3.019	-63.5355				-0.825	-42.101					-0.9975	-63.5355
0.193703	-41.1032					5.368	-50.768				-0.327	-41.1032					1.73	-50.768				-0.24701	-41.1032					2.172	-50.768
-0.62769	-39.4769					4.757	-46.625				0.223999	-39.4769					-1.8604	-46.625				0.143997	-39.4769					4.982	-46.625
0.877197	-40.423					0.445	-45.698				0.758011	-40.423					-1.41799	-45.698				1.19801	-40.423					2.491	-45.698
-2.0206	-39.2306					5	-58.777				0.679001	-39.2306					2.532	-58.777				0.035004	-39.2306					0.811005	-58.777
1.085	-35.383					0	-68.777				-0.83701	-35.383					-2.89099	-68.777				0.257004	-35.383					-3.9646	-68.777
0.916206	-35.1373					6.8447	-61.9323				-0.258	-35.1373					1.625	-61.9323				-0.33	-35.1373					-0.3537	-61.9323
0.728195	-34.2177					5	-68.777				0.387009	-34.2177					2.30602	-68.777				-0.00499	-34.2177					-0.491	-68.777
0.094299	-35.0389										-0.004	-35.0389										-1.7	-35.0389
0.3321	-31.5729										-0.439	-31.5729										-0.446	-31.5729
0.958504	-28.8005										-0.5	-28.8005										-0.25	-28.8005
-1.7066	-29.7996										0.508987	-29.7996										0.951004	-29.7996
0.3545	-31.2675										-0.28799	-31.2675										0.557007	-31.2675
0.596199	-29.7868										-1.39499	-29.7868										0.324005	-29.7868
0.464005	-23.124										-0.677	-23.124										0.141998	-23.124
0.098	-23.456										0.281998	-23.456										0.206009	-23.456
0.018997	-23.603										0.197006	-23.603										0.173996	-23.603
-0.46899	-23.362										1.13901	-23.362										0.095993	-23.362
0.932007	-24.531										0.294998	-24.531										-0.256	-24.531
-0.2308	-46.4329										-2.96201	-46.4329										-3.34	-46.4329
-1.1862	-42.2107										-0.76001	-42.2107										0.855003	-42.2107
-0.9543	-41.3345										-1.099	-41.3345										0.359009	-41.3345
-0.6294	-41.9551										-0.786	-41.9551										-0.47	-41.9551
-1.1176	-34.3836										-1.38599	-34.3836										0.195	-34.3836
-2.255	-35.353										0.231003	-35.353										0.51799	-35.353
-2.9679	-33.5149										0	-33.5149										-0.35701	-33.5149
0.478798	-30.8812										0.251999	-30.8812										-0.154	-30.8812
-0.311	-30.704										0.062012	-30.704										-0.41	-30.704
-2.162	-29.63										-2.362	-29.63										1.48601	-29.63
-3.2438	-29.8558										-1.54399	-29.8558										2.483	-29.8558
-0.099	-25.794										-0.532	-25.794										0.084	-25.794
-3.543	-25.566										-0.34402	-25.566										-1.40901	-25.566
-2.218	-24.063										-0.323	-24.063										-2.39	-24.063
-0.436	-21.273										-0.121	-21.273										-0.592	-21.273
-0.695	-19.751										0.487	-19.751										-0.226	-19.751
-2.128	-22.207										-1.45599	-22.207										0.699997	-22.207
-0.567	-19.237										-0.972	-19.237										0.498993	-19.237
-2.332	-18.607										-1.62601	-18.607										1.571	-18.607
-2.263	-16.759										-0.04599	-16.759										0.651001	-16.759
-2.336	-44.1472										0.178009	-44.1472										-3.08899	-44.1472
-2.3676	-44.7235										-0.07199	-44.7235										1.049	-44.7235
-2.2443	-43.9968										-0.33401	-43.9968										0.970001	-43.9968
0.212799	-39.7431										0.339996	-39.7431										-0.12	-39.7431
-0.0977	-40.5176										-0.91299	-40.5176										-0.43199	-40.5176
0.795502	-40.7598										0.51001	-40.7598										0.713989	-40.7598
-0.3391	-40.2136										-1.776	-40.2136										-0.25101	-40.2136
-2.4107	-38.8955										-1.66299	-38.8955										1.62799	-38.8955
1.1651	-34.948										-0.85001	-34.948										0.545998	-34.948
-2.98589	-34.4769										-5.052	-34.4769										1.133	-34.4769
-0.95879	-34.0618										-1.14801	-34.0618										0.602005	-34.0618
0.293701	-28.4243										-0.63199	-28.4243										0.302994	-28.4243
-1.5543	-29.1243										-1.25101	-29.1243										0.132004	-29.1243
-0.5979	-28.1859										0.735016	-28.1859										-0.2	-28.1859
0.044098	-30.7019										-0.173	-30.7019										-0.35699	-30.7019
-0.411	-26.149										-1.04401	-26.149										-0.35201	-26.149
-2.528	-24.154										-1.59598	-24.154										1.86301	-24.154
-1.554	-26.686										-0.39398	-26.686										0.296997	-26.686
-1.989	-23.628										-0.21899	-23.628										-0.06599	-23.628
-1.993	-17.496										-0.89502	-17.496										0.692993	-17.496
5.1771	-46.5177										-3.5072	-46.5177										3.354	-46.5177
1.3082	-45.2449										0.564095	-45.2449										-2.75699	-45.2449
0.783997	-46.1562										-0.4931	-46.1562										0.735992	-46.1562
0.6483	-45.6028										0.992401	-45.6028										1.30301	-45.6028
0.471794	-42.1422										0.335697	-42.1422										0.137009	-42.1422
-1.0387	-38.8287										1.7801	-38.8287										0.488983	-38.8287
0.783005	-31.722										0.668699	-31.722										0.655991	-31.722
1.6492	-29.5238										1.1883	-29.5238										1.455	-29.5238
0.165604	-29.8804										-0.7825	-29.8804										1.58398	-29.8804
1.13	-26.149										0.589901	-26.149										-0.035	-26.149
0.618004	-26.461										-0.0458	-26.461										-0.048	-26.461
-1.32	-24.885										1.6181	-24.885										-0.01901	-24.885
-0.341	-21.871										-0.0041	-21.871										0.175018	-21.871
0.543999	-16.453										-0.441	-16.453										0.130005	-16.453
0.635002	-15.818										-0.0902	-15.818										0.098999	-15.818
1.667	-17.543										-1.612	-17.543										-0.76599	-17.543
0.75	-15.08										-0.7488	-15.08										0.619995	-15.08
-0.33601	-46.4499										-0.451	-46.4499										1.02901	-46.4499
0.460602	-46.0207										0.059998	-46.0207										3.64099	-46.0207
-1.1744	-43.8126										-1.13799	-43.8126										1.688	-43.8126
-0.5484	-43.1844										-2.32899	-43.1844										1.01199	-43.1844
-1.14439	-47.3612										3.205	-47.3612										0.815979	-47.3612
1.3199	-40.2137										0.736	-40.2137										0.727997	-40.2137
1.4777	-39.8474										0.098999	-39.8474										-0.08701	-39.8474
-3.4981	-41.1256										-0.62401	-41.1256										-0.082	-41.1256
-0.4302	-40.2856										3.183	-40.2856										-0.23297	-40.2856
0.474602	-35.1834										-1.01799	-35.1834										2.58699	-35.1834
0.112099	-36.3398										-0.08899	-36.3398										0.229996	-36.3398
0.097702	-35.3859										0.131012	-35.3859										-0.15701	-35.3859
0.403503	-35.6876										1.149	-35.6876										-0.77298	-35.6876
-0.1319	-37.6107										0.026993	-37.6107										-0.686	-37.6107
-2.09351	-33.5525										1.69299	-33.5525										-1.20599	-33.5525
0.678001	-35.1638										-2.054	-35.1638										2.60199	-35.1638
-0.21941	-30.1234										0.391998	-30.1234										0.382996	-30.1234
-2.3071	-29.6641										2.93901	-29.6641										-1.81299	-29.6641
6.0279	-28.1787										0.361008	-28.1787										-0.26102	-28.1787
-0.083	-25.193										0.07901	-25.193										0.550995	-25.193
-0.043	-25.591										-0.23399	-25.591										0.274017	-25.591
0.210999	-25.382										0.352005	-25.382										0.083008	-25.382
-3.802	-25.647										3.97299	-25.647										3.65399	-25.647
-0.652	-26.103										1.192	-26.103										-0.07498	-26.103
0.323006	-21.196										-0.244	-21.196										0.395004	-21.196
-0.168	-19.533										-1.092	-19.533										0.859985	-19.533
3.437	-22.188										-4.94101	-22.188										-3.76999	-22.188
-0.55901	-21.507										-0.14799	-21.507										0.397003	-21.507
0.341995	-17.212										-0.03101	-17.212										-0.009	-17.212
0.121994	-17.185										-0.06201	-17.185										0.108002	-17.185
1.961	-12.512										-1.42601	-12.512										-0.229	-12.512
0.144699	-45.6234										-0.315	-45.6234										0.231995	-45.6234
-0.8002	-45.2096										0.254013	-45.2096										0.597992	-45.2096
-1.3223	-44.4351										-0.57001	-44.4351										0.884979	-44.4351
-0.73569	-43.7285										0.76001	-43.7285										0.626007	-43.7285
-0.9614	-45.3422										1.68198	-45.3422										2.38101	-45.3422
-2.3695	-39.9726										0.865005	-39.9726										0.940994	-39.9726
-2.9495	-39.9596										0.604004	-39.9596										0.662994	-39.9596
-2.4535	-39.4151										-0.26599	-39.4151										0.117004	-39.4151
0.0354	-40.1816										-0.98099	-40.1816										-0.229	-40.1816
-2.5786	-35.2856										-0.508	-35.2856										0.294006	-35.2856
-0.5945	-33.8245										-0.226	-33.8245										0.14798	-33.8245
-2.3312	-35.4302										-0.11099	-35.4302										0.876007	-35.4302
-0.0267	-35.2817										1.20102	-35.2817										0.117981	-35.2817
0.428398	-31.5856										0.399994	-31.5856										0.639999	-31.5856
0.626602	-30.2884										-0.703	-30.2884										0.384003	-30.2884
-2.288	-29.379										-1.79401	-29.379										0.84198	-29.379
-2.0101	-29.4111										0.063995	-29.4111										0.441986	-29.4111
-0.5927	-31.7297										-0.661	-31.7297										0.630005	-31.7297
-3.035	-24.744										-0.58698	-24.744										0.084	-24.744
-2.166	-24.51										-0.12598	-24.51										-0.142	-24.51
0.450996	-26.24										1.138	-26.24										-1.68201	-26.24
-0.34	-24.879										0.944992	-24.879										-1.854	-24.879
-1.145	-25.834										0.878021	-25.834										0.619995	-25.834
-1.754	-19.691										1.04399	-19.691										0.348999	-19.691
-0.837	-17.901										-0.48601	-17.901										0.231018	-17.901
-0.657	-18.453										-0.064	-18.453										0.01001	-18.453
-1.028	-18.458										0.582001	-18.458										0.623016	-18.458
0.405998	-14.428										-2.47501	-14.428										-3.89799	-14.428
-2.145	-13.559										0.799988	-13.559										1.30099	-13.559
-1.195	-12.421										0.404022	-12.421										-0.217	-12.421
0.128998	-11.078										-0.194	-11.078										0.179016	-11.078
0.695007	-10.17										-4.728	-10.17										-2.54501	-10.17
-2.3938	-44.8365										-0.37601	-44.8365										0.809998	-44.8365
-2.5973	-45.4209										-0.741	-45.4209										0.651001	-45.4209
-1.1339	-47.2623										0.901001	-47.2623										0.97998	-47.2623
1.0516	-38.4108										-0.50101	-38.4108										-0.034	-38.4108
-0.9728	-40.2413										-0.49002	-40.2413										-0.02199	-40.2413
-2.2491	-38.9183										-1.258	-38.9183										1.077	-38.9183
-0.51019	-40.767										0.125	-40.767										0.812988	-40.767
-0.16351	-35.1963										-1.48499	-35.1963										0.281006	-35.1963
-2.07951	-29.6935										0.436981	-29.6935										0.721008	-29.6935
-2.5694	-28.2404										-0.37198	-28.2404										0.455994	-28.2404
-2.84	-24.728										-1.207	-24.728										1.237	-24.728
-1.667	-26.605										-0.05499	-26.605										0.431	-26.605
-1.226	-23.482										0.213989	-23.482										1.01801	-23.482
-2.422	-18.328										-0.048	-18.328										0.074997	-18.328
-3.158	-16.54										-0.883	-16.54										0.44101	-16.54
-1.222	-14.272										-0.46701	-14.272										0.710022	-14.272
1.0035	-45.3601										-1.2567	-45.3601										1.07401	-45.3601
-1.5228	-44.4282										1.2505	-44.4282										1.38901	-44.4282
-0.2908	-39.7512										0.443699	-39.7512										0.493988	-39.7512
0.065697	-40.6619										0.2372	-40.6619										1.353	-40.6619
-0.2251	-41.4871										-0.195	-41.4871										-1.18903	-41.4871
0.310097	-35.7428										0.518997	-35.7428										0.015015	-35.7428
-2.2626	-34.6046										0.496201	-34.6046										0.220001	-34.6046
-0.54771	-31.1197										-1.2897	-31.1197										1.07098	-31.1197
-0.6955	-31.1895										-0.1571	-31.1895										-0.04001	-31.1895
-2.1464	-28.6554										-0.5447	-28.6554										1.599	-28.6554
0.156998	-25.802										-0.4664	-25.802										0.878021	-25.802
-1.765	-24.829										0.90054	-24.829										0.865021	-24.829
0.189003	-26.261										0.403198	-26.261										0.464996	-26.261
6.883	-19.027										-0.971	-19.027										-1.31601	-19.027
-0.51701	-22.269										-0.3187	-22.269										0.414001	-22.269
-1.787	-19.703										1.0387	-19.703										0.557007	-19.703
-1.818	-13.899										1.3334	-13.899										0.34201	-13.899
-0.275	-13.824										1.3042	-13.824										-0.49799	-13.824
-0.358	-15.116										-0.313	-15.116										0.143005	-15.116
-0.245	-16.2										-0.1825	-16.2										1.17899	-16.2
-1.78	-9.633										1.4457	-9.633										-0.202	-9.633
-0.211	-11.327										-0.456	-11.327										0.249023	-11.327
-0.339	-5.639										-0.2649	-5.639										0.263	-5.639
0.542999	-5.844										-0.7654	-5.844										0.927002	-5.844
0.059006	0										-0.0782	0										-0.05099	0
-0.9308	-45.6824										0.102997	-45.6824										0.996979	-45.6824
-0.4035	-46.4756										-1.66699	-46.4756										1.01599	-46.4756
0.197197	-40.7616										2.48401	-40.7616										0.898987	-40.7616
0.761002	-40.4112										-3.164	-40.4112										1.97501	-40.4112
-0.9838	-42.4797										-0.091	-42.4797										1.05902	-42.4797
-2.2816	-40.1557										1.778	-40.1557										0.304993	-40.1557
-3.26199	-34.892										0.391991	-34.892										-1.591	-34.892
-2.7966	-29.9626										1.47601	-29.9626										1.06	-29.9626
-2.2105	-29.3615										0.001007	-29.3615										0.630981	-29.3615
0.487396	-30.1256										-0.435	-30.1256										-0.056	-30.1256
-0.37	-25.383										0.972	-25.383										-0.07498	-25.383
-1.835	-24.007										0.247993	-24.007										0.242004	-24.007
-4.148	-25.935										-0.007	-25.935										4.75998	-25.935
5.837	-20.466										1.588	-20.466										-4.39801	-20.466
-0.302	-14.838										0.056	-14.838										-0.228	-14.838
0.091003	-14.386										-0.08499	-14.386										0.046997	-14.386
-0.492	-13.064										1.13901	-13.064										0.315002	-13.064
-2.57	-15.971										1.60901	-15.971										1.285	-15.971
0.132004	-11.849										-0.03699	-11.849										0.057007	-11.849
-0.259	-8.562										0.582001	-8.562										0.889008	-8.562
0.470596	-45.7756										-1.01599	-45.7756										-0.63202	-45.7756
-1.3709	-47.603										-0.129	-47.603										1.061	-47.603
-2.2403	-39.0575										2.789	-39.0575										1.29199	-39.0575
-1.22231	-38.4023										-0.45399	-38.4023										0.94101	-38.4023
0.862297	-39.7077										0.362	-39.7077										-0.12201	-39.7077
-1.6387	-34.3447										2.823	-34.3447										1.40597	-34.3447
-2.37939	-34.9674										-0.52499	-34.9674										1.353	-34.9674
0.532196	-35.0825										-0.93301	-35.0825										1.15698	-35.0825
-0.2061	-30.1991										1.43799	-30.1991										-0.83701	-30.1991
-0.6941	-29.7541										-0.20401	-29.7541										0.350006	-29.7541
-0.981	-23.033										0.079987	-23.033										-0.461	-23.033
-0.318	-27.486										1.41299	-27.486										-1.465	-27.486
-0.58099	-27.184										0.322998	-27.184										0.514008	-27.184
10.3171	-24.755										0.667999	-24.755										2.09497	-24.755
-0.7	-22.27										-0.14001	-22.27										0.000977	-22.27
-1.813	-21.895										-0.40598	-21.895										0.325012	-21.895
-0.93401	-16.421										0.190994	-16.421										0.287994	-16.421
-0.74799	-15.823										0.106995	-15.823										-0.23798	-15.823
0.149002	-17.216										-0.09	-17.216										0.253998	-17.216
-0.582	-17.143										0.02301	-17.143										-0.79102	-17.143
0.202003	-12.611										0.238007	-12.611										0.035004	-12.611
-2.4627	-39.2858										-0.78	-39.2858										0.60498	-39.2858
-1.2554	-34.6834										-0.31097	-34.6834										0.652985	-34.6834
-0.8259	-36.8178										0.402985	-36.8178										-0.147	-36.8178
-1.65	-29.678										-1.21298	-29.678										1.82397	-29.678
-2.6131	-30.1101										-0.97501	-30.1101										0.06601	-30.1101
-1.0137	-31.7917										-0.259	-31.7917										0.661987	-31.7917
-1.76801	-24.827										1.20099	-24.827										1.17599	-24.827
-1.223	-26.128										-0.21997	-26.128										0.063019	-26.128
7.588	-21.742										2.366	-21.742										-1.31799	-21.742
-1.225	-20.509										0.335999	-20.509										-0.491	-20.509
-3.156	-16.696										-0.37598	-16.696										0.305023	-16.696
-0.71	-16.3										-0.39502	-16.3										0.446014	-16.3
9.69601	-11.544										-0.58499	-11.544										-7.03702	-11.544
4.739	-12.178										2.69901	-12.178										0.414001	-12.178
3.1654	-39.4411										-1.653	-39.4411										0	-39.4411
0.019005	-27.237										-1.38599	-27.237										3.16	-27.237
-1.823	-19.441										-2.008	-19.441										3.108	-19.441
-0.014	-10.449										-1.60498	-10.449										4.40299	-10.449
1.466	-60.1089										-0.7819	-60.1089										0.472992	-60.1089
-0.769	-24.022										-0.53201	-24.022										-1.0897	-24.022
-1.3176	-27.9306										0.440002	-27.9306										-0.67401	-27.9306
-3.342	-22.825										-1.36902	-22.825										0.77002	-22.825
4.10101	-14.781										-0.22699	-14.781										-0.27798	-14.781
-1.2467	-69.9499										1.29099	-69.9499										1.6606	-69.9499
1.5837	-52.6992										2.697	-52.6992										0	-52.6992
5.452	-63.7347										-1.0002	-63.7347										1.6605	-63.7347
5.3098	-58.5492										-0.0825	-58.5492										0.830301	-58.5492
1.4908	-75.6891										1.3255	-75.6891										0.830303	-75.6891
-2.6627	-79.5011										2.042	-79.5011										2.4908	-79.5011
-3.1901	-102.732										0.992294	-102.732										0.830299	-102.732
2.4777	-103.104										-2.13689	-103.104										0	-103.104
0.678699	-86.4878										-4.661	-86.4878										0	-86.4878
4.1535	-110.588										-2.672	-110.588										-0.8302	-110.588
2.2274	-105.02										-6.455	-105.02										-1.6605	-105.02
-2.3396	-105.903										1.49699	-105.903										0	-105.903
1.5176	-90.2936										-0.18802	-90.2936										0.830303	-90.2936
-0.0313	-84.309										-1.681	-84.309										0.8302	-84.309
3.1498	-74.6495										-0.245	-74.6495										0	-74.6495

## Sheet: Figure 4D
		Snmmary of mean speed (nm/s) after acUVB
	Control			1DPI			4DPI
Mouse 1	2.03	0.972806	500	1.48	1.03	400	2.43	1.28387	187
Mouse 2	1.73	0.86	280	1.51	1.03	240	2.7	1.23	260
Mouse 3	1.92	0.64	502	2	0.944553	95	2.3	0.79672	146
Mouse 4				2.35	0.95	490
Mouse 5				2.41	0.78	170
Control 1				Control 2				Control 3					acUVB PI1 day 1				acUVB PI1 day 2				acUVB PI1 day 3				acUVB PI1 day 4				acUVB PI1 day5					acUVB PI4 day 1				acUVB PI4 day 2				acUVB PI4 day 3
Track Speed Mean	Unit	Category	ID	Track Speed Mean	Unit	Category	ID	Track Speed Mean	Unit	Category	ID		Track Speed Mean	Unit	Category	ID	Track Speed Mean	Unit	Category	ID	Track Speed Mean	Unit	Category	ID	Track Speed Mean	Unit	Category	ID	Track Speed Mean	Unit	Category	ID		Track Speed Mean	Unit	Category	ID	Track Speed Mean	Unit	Category	ID	Track Speed Mean	Unit	Category	ID
5.15897	nm/s	Track	1000000000	2.10793	nm/s	Track	1000006882	2.85119	nm/s	Track	1000000036		1.94928		Track	1000000004	2.28618	nm/s	Track	1000000001	1.32325	nm/s	Track	1000000033	1.59924	nm/s	Track	1000000013	3.23093	nm/s	Track	1000000007		2.9475	nm/s	Track	1000000010	1.79391	nm/s	Track	1000000035	1.71148	nm/s	Track	1000000016
1.49277	nm/s	Track	1000000001	2.1414	nm/s	Track	1000006893	1.62528	nm/s	Track	1000000040		0.686267		Track	1000000011	1.86582	nm/s	Track	1000000002	1.05118	nm/s	Track	1000000098	1.07894	nm/s	Track	1000000022	1.93415	nm/s	Track	1000000014		2.60014	nm/s	Track	1000000026	1.81189	nm/s	Track	1000000036	1.68333	nm/s	Track	1000000018
1.12043	nm/s	Track	1000000004	1.83417	nm/s	Track	1000006894	2.55894	nm/s	Track	1000000054		2.27776		Track	1000000017	1.96094	nm/s	Track	1000000004	2.42856	nm/s	Track	1000000102	1.07745	nm/s	Track	1000000023	2.59616	nm/s	Track	1000000018		2.53895	nm/s	Track	1000000027	1.37078	nm/s	Track	1000000038	1.70847	nm/s	Track	1000000030
2.59798	nm/s	Track	1000000005	1.90738	nm/s	Track	1000006931	2.5993	nm/s	Track	1000000063		2.43125		Track	1000000028	2.25069	nm/s	Track	1000000008	1.42237	nm/s	Track	1000000109	1.21409	nm/s	Track	1000000028	2.74892	nm/s	Track	1000000021		2.05816	nm/s	Track	1000000028	1.86844	nm/s	Track	1000000042	2.01578	nm/s	Track	1000000032
2.643	nm/s	Track	1000000007	2.65756	nm/s	Track	1000006932	1.56413	nm/s	Track	1000000079		1.25891		Track	1000000033	2.01208	nm/s	Track	1000000009	1.38116	nm/s	Track	1000000111	1.20112	nm/s	Track	1000000046	3.30954	nm/s	Track	1000000022		1.96325	nm/s	Track	1000000029	1.45522	nm/s	Track	1000000043	2.28412	nm/s	Track	1000000033
1.81098	nm/s	Track	1000000008	1.45385	nm/s	Track	1000006968	4.01927	nm/s	Track	1000000080		0.996902		Track	1000000034	1.94417	nm/s	Track	1000000010	1.42923	nm/s	Track	1000000133	2.32958	nm/s	Track	1000000049	2.45252	nm/s	Track	1000000023		2.0896	nm/s	Track	1000000030	1.38696	nm/s	Track	1000000045	1.81344	nm/s	Track	1000000034
2.52573	nm/s	Track	1000000009	2.14343	nm/s	Track	1000007122	2.76174	nm/s	Track	1000000082		1.14972		Track	1000000045	1.45518	nm/s	Track	1000000011	1.43062	nm/s	Track	1000000134	2.06654	nm/s	Track	1000000050	1.815	nm/s	Track	1000000038		4.72425	nm/s	Track	1000000033	1.46792	nm/s	Track	1000000046	1.8337	nm/s	Track	1000000036
1.48843	nm/s	Track	1000000011	1.267	nm/s	Track	1000007208	1.23523	nm/s	Track	1000000087		1.49893		Track	1000000046	2.19556	nm/s	Track	1000000012	1.60042	nm/s	Track	1000000137	1.28183	nm/s	Track	1000000051	2.1174	nm/s	Track	1000000043		4.95254	nm/s	Track	1000000034	1.47114	nm/s	Track	1000000048	1.74035	nm/s	Track	1000000037
1.7396	nm/s	Track	1000000014	1.0084	nm/s	Track	1000007209	1.99161	nm/s	Track	1000000092		0.856897		Track	1000000070	2.29959	nm/s	Track	1000000014	2.45745	nm/s	Track	1000000141	1.26573	nm/s	Track	1000000056	2.10922	nm/s	Track	1000000044		4.97865	nm/s	Track	1000000035	1.58114	nm/s	Track	1000000049	3.51588	nm/s	Track	1000000038
2.16973	nm/s	Track	1000000015	1.02172	nm/s	Track	1000007213	1.69146	nm/s	Track	1000000093		0.972449		Track	1000000074	1.92575	nm/s	Track	1000000015	1.40628	nm/s	Track	1000000142	1.43365	nm/s	Track	1000000061	1.91916	nm/s	Track	1000000045		3.85388	nm/s	Track	1000000037	2.2713	nm/s	Track	1000000050	1.56037	nm/s	Track	1000000039
2.03161	nm/s	Track	1000000017	1.67101	nm/s	Track	1000007215	1.37671	nm/s	Track	1000000094		0.605136		Track	1000000076	2.0415	nm/s	Track	1000000017	1.88288	nm/s	Track	1000000160	1.44643	nm/s	Track	1000000062	2.02257	nm/s	Track	1000000046		1.95078	nm/s	Track	1000000040	2.89583	nm/s	Track	1000000052	4.60638	nm/s	Track	1000000049
2.75918	nm/s	Track	1000000019	1.11334	nm/s	Track	1000007216	1.89763	nm/s	Track	1000000095		1.81244		Track	1000000077	2.55586	nm/s	Track	1000000018	0.629938	nm/s	Track	1000000164	1.22485	nm/s	Track	1000000063	1.66985	nm/s	Track	1000000047		2.36753	nm/s	Track	1000000041	1.64225	nm/s	Track	1000000054	1.71592	nm/s	Track	1000000054
2.18896	nm/s	Track	1000000020	1.47627	nm/s	Track	1000007217	2.06199	nm/s	Track	1000000096		2.92141		Track	1000000078	2.27925	nm/s	Track	1000000020	2.00959	nm/s	Track	1000000177	1.41115	nm/s	Track	1000000067	1.66191	nm/s	Track	1000000050		1.82596	nm/s	Track	1000000044	2.16289	nm/s	Track	1000000056	1.49394	nm/s	Track	1000000058
2.42118	nm/s	Track	1000000021	2.60044	nm/s	Track	1000007218	1.90657	nm/s	Track	1000000099		1.22787		Track	1000000081	2.28098	nm/s	Track	1000000022	1.47251	nm/s	Track	1000000179	1.42506	nm/s	Track	1000000073	3.00198	nm/s	Track	1000000051		2.23064	nm/s	Track	1000000054	2.36055	nm/s	Track	1000000057	1.57838	nm/s	Track	1000000070
1.61827	nm/s	Track	1000000022	1.85911	nm/s	Track	1000007219	2.3627	nm/s	Track	1000000100		1.39886		Track	1000000085	2.47538	nm/s	Track	1000000023	1.46748	nm/s	Track	1000000181	1.4687	nm/s	Track	1000000079	2.13366	nm/s	Track	1000000052		1.62323	nm/s	Track	1000000056	1.38893	nm/s	Track	1000000058	1.78321	nm/s	Track	1000000071
3.22444	nm/s	Track	1000000023	1.65789	nm/s	Track	1000007220	1.3284	nm/s	Track	1000000104		1.06807		Track	1000000088	2.60575	nm/s	Track	1000000026	1.72774	nm/s	Track	1000000182	1.42011	nm/s	Track	1000000098	2.15019	nm/s	Track	1000000053		2.96826	nm/s	Track	1000000057	3.3996	nm/s	Track	1000000059	2.17305	nm/s	Track	1000000072
2.62528	nm/s	Track	1000000024	1.21993	nm/s	Track	1000007221	2.58808	nm/s	Track	1000000105		2.11043		Track	1000000098	2.23854	nm/s	Track	1000000027	1.06338	nm/s	Track	1000000183	0.672343	nm/s	Track	1000000099	2.11154	nm/s	Track	1000000054		1.3931	nm/s	Track	1000000059	1.62573	nm/s	Track	1000000060	1.45203	nm/s	Track	1000000073
1.6209	nm/s	Track	1000000025	1.54512	nm/s	Track	1000007222	2.37006	nm/s	Track	1000000106		0.790754		Track	1000000101	2.24234	nm/s	Track	1000000029	1.48535	nm/s	Track	1000000185	1.42148	nm/s	Track	1000000107	2.73484	nm/s	Track	1000000056		1.751	nm/s	Track	1000000065	1.91263	nm/s	Track	1000000061	1.58406	nm/s	Track	1000000075
2.17948	nm/s	Track	1000000026	1.25316	nm/s	Track	1000007224	1.29938	nm/s	Track	1000000107		1.43166		Track	1000000103	2.21908	nm/s	Track	1000000030	1.62489	nm/s	Track	1000000186	0.917314	nm/s	Track	1000000108	2.04882	nm/s	Track	1000000057		1.57078	nm/s	Track	1000000068	1.74728	nm/s	Track	1000000062	1.70694	nm/s	Track	1000000076
2.84713	nm/s	Track	1000000027	3.65438	nm/s	Track	1000007225	1.94932	nm/s	Track	1000000118		1.1822		Track	1000000105	2.5068	nm/s	Track	1000000031	1.02856	nm/s	Track	1000000190	1.46092	nm/s	Track	1000000113	2.71589	nm/s	Track	1000000058		1.71041	nm/s	Track	1000000072	1.39514	nm/s	Track	1000000063	1.69936	nm/s	Track	1000000077
2.81004	nm/s	Track	1000000028	1.64093	nm/s	Track	1000007228	2.07302	nm/s	Track	1000000123		1.50317		Track	1000000106	2.28622	nm/s	Track	1000000032	0.75676	nm/s	Track	1000000192	0.895473	nm/s	Track	1000000115	4.13567	nm/s	Track	1000000082		2.05778	nm/s	Track	1000000073	1.75308	nm/s	Track	1000000070	1.64485	nm/s	Track	1000000078
1.90746	nm/s	Track	1000000029	1.64805	nm/s	Track	1000007230	2.04371	nm/s	Track	1000000124		1.37656		Track	1000000108	1.92918	nm/s	Track	1000000033	1.69412	nm/s	Track	1000000198	1.45411	nm/s	Track	1000000116	3.14635	nm/s	Track	1000000084		1.91979	nm/s	Track	1000000074	1.13961	nm/s	Track	1000000071	1.638	nm/s	Track	1000000080
1.82755	nm/s	Track	1000000030	1.19425	nm/s	Track	1000007231	2.0526	nm/s	Track	1000000125		1.04442		Track	1000000109	1.82397	nm/s	Track	1000000035	1.87989	nm/s	Track	1000000200	1.34888	nm/s	Track	1000000117	2.60329	nm/s	Track	1000000086		2.38882	nm/s	Track	1000000075	1.49986	nm/s	Track	1000000081	1.68489	nm/s	Track	1000000081
2.14744	nm/s	Track	1000000031	1.02642	nm/s	Track	1000007267	1.65801	nm/s	Track	1000000130		1.21552		Track	1000000110	2.25011	nm/s	Track	1000000036	1.63171	nm/s	Track	1000000201	1.43515	nm/s	Track	1000000121	2.94946	nm/s	Track	1000000087		1.66757	nm/s	Track	1000000076	1.33187	nm/s	Track	1000000092	1.67664	nm/s	Track	1000000082
1.92655	nm/s	Track	1000000033	2.67296	nm/s	Track	1000007269	1.47256	nm/s	Track	1000000133		1.75215		Track	1000000120	1.78107	nm/s	Track	1000000037	1.59277	nm/s	Track	1000000202	1.4004	nm/s	Track	1000000136	1.55829	nm/s	Track	1000000088		1.93682	nm/s	Track	1000000078	1.57217	nm/s	Track	1000000094	4.17334	nm/s	Track	1000000085
2.49882	nm/s	Track	1000000035	1.96928	nm/s	Track	1000007274	2.45886	nm/s	Track	1000000137		1.38516		Track	1000000124	2.13961	nm/s	Track	1000000039	1.82684	nm/s	Track	1000000203	1.41847	nm/s	Track	1000000142	2.61138	nm/s	Track	1000000090		2.82028	nm/s	Track	1000000081	1.89799	nm/s	Track	1000000095	1.9681	nm/s	Track	1000000087
2.40529	nm/s	Track	1000000036	0.914714	nm/s	Track	1000007275	2.3583	nm/s	Track	1000000138		1.37053		Track	1000000138	2.33925	nm/s	Track	1000000043	1.13765	nm/s	Track	1000000204	1.43793	nm/s	Track	1000000161	1.80591	nm/s	Track	1000000091		1.71672	nm/s	Track	1000000084	2.19689	nm/s	Track	1000000096	2.64324	nm/s	Track	1000000091
2.28139	nm/s	Track	1000000037	1.16874	nm/s	Track	1000007276	1.63452	nm/s	Track	1000000141		0.977732		Track	1000000141	2.02945	nm/s	Track	1000000047	1.51981	nm/s	Track	1000000207	0.798132	nm/s	Track	1000000162	2.02528	nm/s	Track	1000000093		2.62314	nm/s	Track	1000000085	4.50806	nm/s	Track	1000000097	3.2358	nm/s	Track	1000000092
1.11884	nm/s	Track	1000000039	1.4778	nm/s	Track	1000007277	1.84014	nm/s	Track	1000000145		1.38371		Track	1000000143	2.36421	nm/s	Track	1000000053	0.778258	nm/s	Track	1000000210	1.14202	nm/s	Track	1000000167	2.59167	nm/s	Track	1000000094		2.09981	nm/s	Track	1000000086	2.95287	nm/s	Track	1000000098	1.65622	nm/s	Track	1000000093
2.78933	nm/s	Track	1000000040	1.09823	nm/s	Track	1000007278	2.03484	nm/s	Track	1000000146		1.17611		Track	1000000145	2.53567	nm/s	Track	1000000054	0.72463	nm/s	Track	1000000211	0.85684	nm/s	Track	1000000208	1.93458	nm/s	Track	1000000095		2.5192	nm/s	Track	1000000088	2.00683	nm/s	Track	1000000099	1.88137	nm/s	Track	1000000094
2.21888	nm/s	Track	1000000041	2.13122	nm/s	Track	1000007279	2.26664	nm/s	Track	1000000147		1.18172		Track	1000000147	3.69496	nm/s	Track	1000000055	1.14225	nm/s	Track	1000000212	0.543632	nm/s	Track	1000000212	3.12645	nm/s	Track	1000000096		2.80352	nm/s	Track	1000000089	1.38019	nm/s	Track	1000000100	1.87237	nm/s	Track	1000000095
1.87227	nm/s	Track	1000000042	0.824931	nm/s	Track	1000007280	1.75037	nm/s	Track	1000000149		1.0259		Track	1000000148	3.02223	nm/s	Track	1000000056	1.00868	nm/s	Track	1000000214	1.74744	nm/s	Track	1000000263	1.98685	nm/s	Track	1000000097		2.6855	nm/s	Track	1000000090	1.27022	nm/s	Track	1000000101	2.08245	nm/s	Track	1000000097
2.25604	nm/s	Track	1000000043	1.15958	nm/s	Track	1000007281	1.25341	nm/s	Track	1000000150		1.05001		Track	1000000159	3.17881	nm/s	Track	1000000058	1.38935	nm/s	Track	1000000215	1.43651	nm/s	Track	1000000292	1.77435	nm/s	Track	1000000108		1.71349	nm/s	Track	1000000091	1.61966	nm/s	Track	1000000102	2.10603	nm/s	Track	1000000104
2.53738	nm/s	Track	1000000044	2.15595	nm/s	Track	1000007285	2.82815	nm/s	Track	1000000151		1.44516		Track	1000000160	2.69653	nm/s	Track	1000000059	3.14551	nm/s	Track	1000000222	1.29408	nm/s	Track	1000000294	1.50556	nm/s	Track	1000000112		3.02796	nm/s	Track	1000000092	1.97248	nm/s	Track	1000000103	1.55152	nm/s	Track	1000000107
1.48689	nm/s	Track	1000000045	1.44312	nm/s	Track	1000007286	1.60246	nm/s	Track	1000000179		1.70355		Track	1000000162	3.46692	nm/s	Track	1000000060	2.7546	nm/s	Track	1000000224	1.45857	nm/s	Track	1000000296	1.86498	nm/s	Track	1000000114		3.34419	nm/s	Track	1000000095	2.43854	nm/s	Track	1000000109	2.5727	nm/s	Track	1000000109
2.79203	nm/s	Track	1000000046	1.60358	nm/s	Track	1000007330	1.62733	nm/s	Track	1000000180		1.36471		Track	1000000163	2.39359	nm/s	Track	1000000061	1.93899	nm/s	Track	1000000226	1.28445	nm/s	Track	1000000302	1.3588	nm/s	Track	1000000116		2.76112	nm/s	Track	1000000096	2.17484	nm/s	Track	1000000110	1.9478	nm/s	Track	1000000110
2.35997	nm/s	Track	1000000047	1.86633	nm/s	Track	1000007337	1.67545	nm/s	Track	1000000181		1.3827		Track	1000000166	2.27874	nm/s	Track	1000000062	2.10708	nm/s	Track	1000000227	1.30678	nm/s	Track	1000000303	3.79419	nm/s	Track	1000000119		1.90495	nm/s	Track	1000000098	2.3847	nm/s	Track	1000000112	1.68037	nm/s	Track	1000000114
1.35374	nm/s	Track	1000000050	1.76233	nm/s	Track	1000007338	2.95147	nm/s	Track	1000000184		0.967923		Track	1000000167	2.13544	nm/s	Track	1000000064	1.35257	nm/s	Track	1000000229	1.56564	nm/s	Track	1000000309	1.88044	nm/s	Track	1000000120		3.35444	nm/s	Track	1000000099	3.11516	nm/s	Track	1000000114	1.60355	nm/s	Track	1000000115
1.89566	nm/s	Track	1000000051	1.4535	nm/s	Track	1000007341	1.71988	nm/s	Track	1000000187		2.39549		Track	1000000168	2.80398	nm/s	Track	1000000065	1.14973	nm/s	Track	1000000237	1.71856	nm/s	Track	1000000322	3.13893	nm/s	Track	1000000121		2.71798	nm/s	Track	1000000100	1.56991	nm/s	Track	1000000116	1.74616	nm/s	Track	1000000116
5.43422	nm/s	Track	1000000052	1.4579	nm/s	Track	1000007342	1.58583	nm/s	Track	1000000188		2.08055		Track	1000000174	2.51105	nm/s	Track	1000000066	3.19503	nm/s	Track	1000000246	0.77644	nm/s	Track	1000000341	2.20873	nm/s	Track	1000000125		2.93406	nm/s	Track	1000000102	1.37295	nm/s	Track	1000000117	1.86475	nm/s	Track	1000000117
2.86418	nm/s	Track	1000000053	1.93524	nm/s	Track	1000007345	1.39321	nm/s	Track	1000000189		1.70263		Track	1000000175	3.1887	nm/s	Track	1000000067	1.656	nm/s	Track	1000000247	1.5099	nm/s	Track	1000000367	2.01467	nm/s	Track	1000000127		1.98668	nm/s	Track	1000000103	1.28177	nm/s	Track	1000000118	2.58139	nm/s	Track	1000000118
2.74241	nm/s	Track	1000000055	1.77634	nm/s	Track	1000007346	2.17609	nm/s	Track	1000000208		1.10833		Track	1000000176	2.00147	nm/s	Track	1000000068	2.90627	nm/s	Track	1000000248	1.49994	nm/s	Track	1000000368	1.66855	nm/s	Track	1000000128		2.48955	nm/s	Track	1000000104	3.93985	nm/s	Track	1000000119	1.87921	nm/s	Track	1000000119
2.25158	nm/s	Track	1000000057	1.56945	nm/s	Track	1000007348	1.77308	nm/s	Track	1000000209		1.69072		Track	1000000178	2.30001	nm/s	Track	1000000069	3.50853	nm/s	Track	1000000249	1.35189	nm/s	Track	1000000369	1.92623	nm/s	Track	1000000129		1.56332	nm/s	Track	1000000105	1.34875	nm/s	Track	1000000121	1.51025	nm/s	Track	1000000120
2.11894	nm/s	Track	1000000059	2.22556	nm/s	Track	1000007351	1.26917	nm/s	Track	1000000222		1.05257		Track	1000000180	2.29839	nm/s	Track	1000000070	1.85591	nm/s	Track	1000000250	1.12282	nm/s	Track	1000000407	2.74548	nm/s	Track	1000000130		2.19641	nm/s	Track	1000000122	1.40944	nm/s	Track	1000000122	1.62241	nm/s	Track	1000000121
3.2571	nm/s	Track	1000000060	2.02397	nm/s	Track	1000007352	1.49269	nm/s	Track	1000000245		1.13786		Track	1000000182	1.76069	nm/s	Track	1000000071	1.21669	nm/s	Track	1000000252	1.71643	nm/s	Track	1000000413	1.75588	nm/s	Track	1000000142		1.73981	nm/s	Track	1000000126	1.46777	nm/s	Track	1000000123	1.65554	nm/s	Track	1000000122
2.04818	nm/s	Track	1000000061	1.8591	nm/s	Track	1000007355	1.20216	nm/s	Track	1000000257		1.14326		Track	1000000187	1.74349	nm/s	Track	1000000072	5.18807	nm/s	Track	1000000265	1.32598	nm/s	Track	1000000443	2.2827	nm/s	Track	1000000145		2.33837	nm/s	Track	1000000127	1.67572	nm/s	Track	1000000124	2.51784	nm/s	Track	1000000123
1.58018	nm/s	Track	1000000062	1.72288	nm/s	Track	1000007356	1.87159	nm/s	Track	1000000258		1.74748		Track	1000000188	2.42087	nm/s	Track	1000000073	1.23306	nm/s	Track	1000000270	1.50017	nm/s	Track	1000000457	3.36174	nm/s	Track	1000000146		2.76398	nm/s	Track	1000000128	1.38794	nm/s	Track	1000000125	2.1894	nm/s	Track	1000000126
2.04664	nm/s	Track	1000000063	1.50598	nm/s	Track	1000007357	2.58756	nm/s	Track	1000000261		1.48673		Track	1000000196	2.70474	nm/s	Track	1000000074	1.79254	nm/s	Track	1000000272	1.27002	nm/s	Track	1000000459	2.23996	nm/s	Track	1000000149		1.60415	nm/s	Track	1000000129	3.43968	nm/s	Track	1000000130	2.01413	nm/s	Track	1000000127
2.23958	nm/s	Track	1000000064	1.16557	nm/s	Track	1000007358	1.63719	nm/s	Track	1000000262		1.32222		Track	1000000199	1.88477	nm/s	Track	1000000075	1.506	nm/s	Track	1000000273	0.976214	nm/s	Track	1000000460	2.43678	nm/s	Track	1000000150		2.6505	nm/s	Track	1000000130	1.18044	nm/s	Track	1000000131	2.68727	nm/s	Track	1000000130
2.21738	nm/s	Track	1000000065	1.66169	nm/s	Track	1000007361	1.4045	nm/s	Track	1000000263		1.162		Track	1000000208	1.98103	nm/s	Track	1000000077	1.03476	nm/s	Track	1000000275	1.8502	nm/s	Track	1000000466	4.06955	nm/s	Track	1000000151		2.51863	nm/s	Track	1000000136	1.32708	nm/s	Track	1000000133	4.82108	nm/s	Track	1000000132
2.40961	nm/s	Track	1000000066	2.17695	nm/s	Track	1000007362	1.77874	nm/s	Track	1000000271		1.16682		Track	1000000216	3.2385	nm/s	Track	1000000080	1.59044	nm/s	Track	1000000285	0.860758	nm/s	Track	1000000468	4.39998	nm/s	Track	1000000152		2.50914	nm/s	Track	1000000139	1.53193	nm/s	Track	1000000134	2.03746	nm/s	Track	1000000136
4.48398	nm/s	Track	1000000067	1.70662	nm/s	Track	1000007363	1.73195	nm/s	Track	1000000273		0.953336		Track	1000000217	1.72224	nm/s	Track	1000000081	2.2914	nm/s	Track	1000000286	0.593426	nm/s	Track	1000000474	2.14899	nm/s	Track	1000000153		2.95277	nm/s	Track	1000000140	1.69608	nm/s	Track	1000000135	2.13374	nm/s	Track	1000000137
3.34225	nm/s	Track	1000000068	1.65249	nm/s	Track	1000007367	1.1906	nm/s	Track	1000000274		1.25198		Track	1000000218	1.7883	nm/s	Track	1000000082	4.73175	nm/s	Track	1000000287	0.675135	nm/s	Track	1000000480	2.23548	nm/s	Track	1000000164		3.50115	nm/s	Track	1000000141	1.08175	nm/s	Track	1000000136	1.69307	nm/s	Track	1000000139
3.06864	nm/s	Track	1000000069	1.63079	nm/s	Track	1000007369	1.37071	nm/s	Track	1000000276		1.27147		Track	1000000220	2.28796	nm/s	Track	1000000083	1.87174	nm/s	Track	1000000288	1.21142	nm/s	Track	1000000482	2.57896	nm/s	Track	1000000170		2.13327	nm/s	Track	1000000142	0.854835	nm/s	Track	1000000137	2.23653	nm/s	Track	1000000141
2.36641	nm/s	Track	1000000070	2.34059	nm/s	Track	1000007396	2.27432	nm/s	Track	1000000299		1.35007		Track	1000000222	3.26038	nm/s	Track	1000000084	1.66028	nm/s	Track	1000000289	0.743429	nm/s	Track	1000000503	2.31556	nm/s	Track	1000000174		2.34341	nm/s	Track	1000000145	1.38096	nm/s	Track	1000000138	2.0729	nm/s	Track	1000000142
2.75662	nm/s	Track	1000000071	2.07462	nm/s	Track	1000007398	1.65448	nm/s	Track	1000000304		1.3738		Track	1000000223	1.85988	nm/s	Track	1000000085	1.61206	nm/s	Track	1000000292	1.4589	nm/s	Track	1000000523	1.56332	nm/s	Track	1000000186		3.35179	nm/s	Track	1000000147	1.32514	nm/s	Track	1000000139	1.62368	nm/s	Track	1000000143
1.29976	nm/s	Track	1000000072	2.26033	nm/s	Track	1000007407	2.18105	nm/s	Track	1000000316		1.01406		Track	1000000225	2.40472	nm/s	Track	1000000086	1.04587	nm/s	Track	1000000293	1.82232	nm/s	Track	1000000525	1.92613	nm/s	Track	1000000188		2.2863	nm/s	Track	1000000148	1.52802	nm/s	Track	1000000140	2.10648	nm/s	Track	1000000144
2.1904	nm/s	Track	1000000073	1.12639	nm/s	Track	1000007408	2.25853	nm/s	Track	1000000317		1.83547		Track	1000000228	2.33778	nm/s	Track	1000000087	1.59727	nm/s	Track	1000000306	1.28049	nm/s	Track	1000000526	2.10659	nm/s	Track	1000000191		1.8601	nm/s	Track	1000000152	1.47694	nm/s	Track	1000000163	2.46765	nm/s	Track	1000000145
1.14475	nm/s	Track	1000000075	1.67112	nm/s	Track	1000007411	2.09412	nm/s	Track	1000000319		1.14962		Track	1000000229	2.17861	nm/s	Track	1000000089	1.90773	nm/s	Track	1000000310	1.70842	nm/s	Track	1000000528	2.78905	nm/s	Track	1000000192		4.26551	nm/s	Track	1000000167	1.82767	nm/s	Track	1000000164	2.10597	nm/s	Track	1000000146
1.72528	nm/s	Track	1000000077	2.68699	nm/s	Track	1000007412	1.40905	nm/s	Track	1000000320		1.52717		Track	1000000232	2.12135	nm/s	Track	1000000090	1.67896	nm/s	Track	1000000313	1.85525	nm/s	Track	1000000532	2.29728	nm/s	Track	1000000194		2.937	nm/s	Track	1000000171	1.36525	nm/s	Track	1000000165	2.03839	nm/s	Track	1000000148
0.95653	nm/s	Track	1000000078	2.68688	nm/s	Track	1000007415	1.57815	nm/s	Track	1000000342		2.14975		Track	1000000233	2.08461	nm/s	Track	1000000091	2.42086	nm/s	Track	1000000315	1.32478	nm/s	Track	1000000533	2.31606	nm/s	Track	1000000195		2.66587	nm/s	Track	1000000176	1.11695	nm/s	Track	1000000167	5.46128	nm/s	Track	1000000149
1.82374	nm/s	Track	1000000081	1.76101	nm/s	Track	1000007416	2.91275	nm/s	Track	1000000344		1.27787		Track	1000000235	2.52298	nm/s	Track	1000000092	1.73804	nm/s	Track	1000000338	1.00209	nm/s	Track	1000000534	2.14796	nm/s	Track	1000000197		3.49815	nm/s	Track	1000000178	1.58954	nm/s	Track	1000000168	3.1686	nm/s	Track	1000000151
2.15212	nm/s	Track	1000000083	2.59337	nm/s	Track	1000007417	1.65221	nm/s	Track	1000000347		1.03649		Track	1000000237	2.43897	nm/s	Track	1000000093	0.833865	nm/s	Track	1000000339	1.18247	nm/s	Track	1000000535	2.22237	nm/s	Track	1000000207		4.46212	nm/s	Track	1000000179	1.50026	nm/s	Track	1000000169	1.96357	nm/s	Track	1000000154
2.59826	nm/s	Track	1000000085	1.30723	nm/s	Track	1000007418	1.52383	nm/s	Track	1000000353		3.41315		Track	1000000241	1.98846	nm/s	Track	1000000094	1.64066	nm/s	Track	1000000340	1.05133	nm/s	Track	1000000537	2.10212	nm/s	Track	1000000208		1.70492	nm/s	Track	1000000192	0.974876	nm/s	Track	1000000170	1.78888	nm/s	Track	1000000156
2.21346	nm/s	Track	1000000087	1.39036	nm/s	Track	1000007419	2.07728	nm/s	Track	1000000354		2.07355		Track	1000000258	2.06328	nm/s	Track	1000000095	1.41386	nm/s	Track	1000000342	2.17043	nm/s	Track	1000000555	1.52679	nm/s	Track	1000000210		1.96108	nm/s	Track	1000000193	1.12171	nm/s	Track	1000000177	1.68729	nm/s	Track	1000000157
1.86285	nm/s	Track	1000000088	1.757	nm/s	Track	1000007421	1.67991	nm/s	Track	1000000357		0.970336		Track	1000000262	1.68943	nm/s	Track	1000000096	2.21834	nm/s	Track	1000000352	2.77913	nm/s	Track	1000000570	2.6655	nm/s	Track	1000000211		3.50978	nm/s	Track	1000000195	1.88415	nm/s	Track	1000000179	4.13222	nm/s	Track	1000000160
1.81887	nm/s	Track	1000000089	2.34375	nm/s	Track	1000007422	1.09836	nm/s	Track	1000000394		0.916725		Track	1000000263	1.94548	nm/s	Track	1000000097	2.22492	nm/s	Track	1000000362	1.46401	nm/s	Track	1000000577	1.80999	nm/s	Track	1000000214		1.96353	nm/s	Track	1000000198	1.98288	nm/s	Track	1000000180	1.55089	nm/s	Track	1000000163
2.22798	nm/s	Track	1000000090	1.51082	nm/s	Track	1000007423	1.18844	nm/s	Track	1000000395		1.32495		Track	1000000266	2.70831	nm/s	Track	1000000098	1.90483	nm/s	Track	1000000369	1.40197	nm/s	Track	1000000580	2.17406	nm/s	Track	1000000234		1.7012	nm/s	Track	1000000199	1.33981	nm/s	Track	1000000181	1.88426	nm/s	Track	1000000164
2.75474	nm/s	Track	1000000092	2.05612	nm/s	Track	1000007425	2.45725	nm/s	Track	1000000397		1.31939		Track	1000000267	2.63124	nm/s	Track	1000000099	3.19314	nm/s	Track	1000000377	0.657178	nm/s	Track	1000000581	2.08772	nm/s	Track	1000000237		3.77255	nm/s	Track	1000000201	2.74317	nm/s	Track	1000000183	2.00263	nm/s	Track	1000000173
2.78322	nm/s	Track	1000000093	1.54249	nm/s	Track	1000007427	1.92772	nm/s	Track	1000000433		1.10177		Track	1000000271	2.17854	nm/s	Track	1000000100	3.24987	nm/s	Track	1000000397	1.57436	nm/s	Track	1000000582	1.88673	nm/s	Track	1000000238		2.23078	nm/s	Track	1000000211	1.02454	nm/s	Track	1000000184	1.59446	nm/s	Track	1000000174
2.42731	nm/s	Track	1000000094	1.75118	nm/s	Track	1000007428	1.48098	nm/s	Track	1000000435		1.77706		Track	1000000272	2.29465	nm/s	Track	1000000101	1.716	nm/s	Track	1000000399	0.760979	nm/s	Track	1000000585	2.34944	nm/s	Track	1000000247		1.622	nm/s	Track	1000000212	1.4241	nm/s	Track	1000000186	2.43091	nm/s	Track	1000000176
1.64507	nm/s	Track	1000000096	2.55361	nm/s	Track	1000007429	2.50957	nm/s	Track	1000000436		1.49822		Track	1000000273	2.01395	nm/s	Track	1000000102	1.84164	nm/s	Track	1000000404	1.95957	nm/s	Track	1000000586	2.07697	nm/s	Track	1000000248		2.22306	nm/s	Track	1000000237	1.63009	nm/s	Track	1000000187	1.37454	nm/s	Track	1000000177
2.02112	nm/s	Track	1000000097	2.00725	nm/s	Track	1000007430	1.75572	nm/s	Track	1000000444		1.4091		Track	1000000274	1.95514	nm/s	Track	1000000103	1.8958	nm/s	Track	1000000405	2.15207	nm/s	Track	1000000589	2.1618	nm/s	Track	1000000251		2.51882	nm/s	Track	1000000239	1.41869	nm/s	Track	1000000188	1.92196	nm/s	Track	1000000181
3.99708	nm/s	Track	1000000098	1.00986	nm/s	Track	1000007434	2.01111	nm/s	Track	1000000447		1.33117		Track	1000000275	2.92036	nm/s	Track	1000000104	0.991309	nm/s	Track	1000000408	1.29446	nm/s	Track	1000000590	1.80506	nm/s	Track	1000000252		2.23449	nm/s	Track	1000000240	1.41994	nm/s	Track	1000000189	1.91695	nm/s	Track	1000000182
1.52421	nm/s	Track	1000000099	1.66738	nm/s	Track	1000007435	2.06116	nm/s	Track	1000000450		1.05473		Track	1000000276	2.05239	nm/s	Track	1000000105	2.47133	nm/s	Track	1000000944	0.961389	nm/s	Track	1000000593	2.6589	nm/s	Track	1000000253		1.85796	nm/s	Track	1000000241	1.75658	nm/s	Track	1000000190	2.28508	nm/s	Track	1000000183
2.20479	nm/s	Track	1000000100	1.75223	nm/s	Track	1000007436	1.85233	nm/s	Track	1000000451		1.08463		Track	1000000277	2.07859	nm/s	Track	1000000107	2.79895	nm/s	Track	1000001346	1.44376	nm/s	Track	1000000595	2.64921	nm/s	Track	1000000254		1.62518	nm/s	Track	1000000243	1.19646	nm/s	Track	1000000191	2.60439	nm/s	Track	1000000190
2.10502	nm/s	Track	1000000101	1.49293	nm/s	Track	1000007437	1.36144	nm/s	Track	1000000452		0.635675		Track	1000000279	1.18798	nm/s	Track	1000000108	1.61776	nm/s	Track	1000001581	1.35665	nm/s	Track	1000000600	1.93042	nm/s	Track	1000000257		1.57828	nm/s	Track	1000000244	1.06058	nm/s	Track	1000000192	1.81295	nm/s	Track	1000000191
2.65531	nm/s	Track	1000000102	1.98248	nm/s	Track	1000007439	1.4605	nm/s	Track	1000000453		1.00282		Track	1000000281	1.89862	nm/s	Track	1000000109	2.15772	nm/s	Track	1000004492	0.535072	nm/s	Track	1000000610	2.31161	nm/s	Track	1000000258		1.72648	nm/s	Track	1000000245	2.53416	nm/s	Track	1000000202	1.78512	nm/s	Track	1000000192
2.04071	nm/s	Track	1000000103	1.10414	nm/s	Track	1000007441	0.985501	nm/s	Track	1000000454		1.38641		Track	1000000284	1.98449	nm/s	Track	1000000110	2.85189	nm/s	Track	1000005963	2.28201	nm/s	Track	1000000630	2.966	nm/s	Track	1000000259		1.64427	nm/s	Track	1000000246	1.27191	nm/s	Track	1000000204	2.69283	nm/s	Track	1000000193
2.10156	nm/s	Track	1000000104	1.57861	nm/s	Track	1000007476	2.20811	nm/s	Track	1000000455		1.09858		Track	1000000285	2.06924	nm/s	Track	1000000111	2.83054	nm/s	Track	1000005968	1.49879	nm/s	Track	1000000632	1.6847	nm/s	Track	1000000260		1.59348	nm/s	Track	1000000252	1.70493	nm/s	Track	1000000206	1.91186	nm/s	Track	1000000194
1.74285	nm/s	Track	1000000105	2.52525	nm/s	Track	1000007478	1.7625	nm/s	Track	1000000456		1.26248		Track	1000000290	2.84576	nm/s	Track	1000000112	2.06316	nm/s	Track	1000006021	1.97913	nm/s	Track	1000000634	1.7933	nm/s	Track	1000000261		1.36554	nm/s	Track	1000000253	1.38795	nm/s	Track	1000000207	2.97173	nm/s	Track	1000000195
2.264	nm/s	Track	1000000108	1.16432	nm/s	Track	1000007479	2.93554	nm/s	Track	1000000483		1.54708		Track	1000000291	2.27184	nm/s	Track	1000000113	2.80504	nm/s	Track	1000006023	0.909023	nm/s	Track	1000000637	2.19337	nm/s	Track	1000000262		1.93483	nm/s	Track	1000000254	1.16341	nm/s	Track	1000000208	4.37043	nm/s	Track	1000000199
1.78481	nm/s	Track	1000000110	1.80207	nm/s	Track	1000007480	2.33049	nm/s	Track	1000000484		1.08902		Track	1000000292	2.87569	nm/s	Track	1000000114	3.46815	nm/s	Track	1000006027	0.839897	nm/s	Track	1000000638	6.97197	nm/s	Track	1000000263		1.76362	nm/s	Track	1000000255	1.11569	nm/s	Track	1000000209	1.91501	nm/s	Track	1000000203
1.66379	nm/s	Track	1000000111	1.25256	nm/s	Track	1000007483	1.69261	nm/s	Track	1000000490		1.99131		Track	1000000294	2.74584	nm/s	Track	1000000116	3.65383	nm/s	Track	1000006029	0.970418	nm/s	Track	1000000639	2.69883	nm/s	Track	1000000264		1.6862	nm/s	Track	1000000257	1.94779	nm/s	Track	1000000221	3.0198	nm/s	Track	1000000204
1.74409	nm/s	Track	1000000112	1.88454	nm/s	Track	1000007485	1.83277	nm/s	Track	1000000491		0.910409		Track	1000000295	1.93143	nm/s	Track	1000000117	1.89209	nm/s	Average		1.8456	nm/s	Track	1000000640	2.83363	nm/s	Track	1000000274		2.06198	nm/s	Track	1000000264	4.31254	nm/s	Track	1000000225	2.84036	nm/s	Track	1000000205
2.48916	nm/s	Track	1000000113	2.77269	nm/s	Track	1000007486	1.41956	nm/s	Track	1000000492		1.35023		Track	1000000297	2.03293	nm/s	Track	1000000120	0.845536	nm/s	STDW		0.956134	nm/s	Track	1000000642	2.21628	nm/s	Track	1000000276		1.51656	nm/s	Track	1000000265	1.59581	nm/s	Track	1000000226	1.81805	nm/s	Track	1000000206
1.27243	nm/s	Track	1000000114	1.59882	nm/s	Track	1000007487	1.51493	nm/s	Track	1000000494		1.42601		Track	1000000299	1.77573	nm/s	Track	1000000124					1.08025	nm/s	Track	1000000647	2.24422	nm/s	Track	1000000279		1.73866	nm/s	Track	1000000266	1.68798	nm/s	Track	1000000227	2.45445	nm/s	Track	1000000208
1.17615	nm/s	Track	1000000115	1.19373	nm/s	Track	1000007488	1.32656	nm/s	Track	1000000495		1.74804		Track	1000000303	2.04997	nm/s	Track	1000000125					1.2644	nm/s	Track	1000000655	2.00876	nm/s	Track	1000000280		1.81485	nm/s	Track	1000000267	1.32116	nm/s	Track	1000000229	2.57015	nm/s	Track	1000000213
2.12677	nm/s	Track	1000000116	2.07807	nm/s	Track	1000007489	2.21881	nm/s	Track	1000000496		1.03578		Track	1000000306	2.8033	nm/s	Track	1000000129					1.39877	nm/s	Track	1000000656	1.71855	nm/s	Track	1000000282		1.27552	nm/s	Track	1000000268	1.52377	nm/s	Track	1000000230	1.99864	nm/s	Track	1000000217
1.43493	nm/s	Track	1000000117	2.41697	nm/s	Track	1000007490	1.60611	nm/s	Track	1000000497		1.37672		Track	1000000307	2.5412	nm/s	Track	1000000133					1.46517	nm/s	Track	1000000660	1.83054	nm/s	Track	1000000283		2.03206	nm/s	Track	1000000279	1.16858	nm/s	Track	1000000231	2.05396	nm/s	Track	1000000219
1.82377	nm/s	Track	1000000118	1.65973	nm/s	Track	1000007491	2.93284	nm/s	Track	1000000520		1.54753		Track	1000000329	2.91222	nm/s	Track	1000000134					0.751554	nm/s	Track	1000000672	2.38303	nm/s	Track	1000000284		2.32385	nm/s	Track	1000000280	2.45512	nm/s	Track	1000000238	2.18974	nm/s	Track	1000000220
2.07509	nm/s	Track	1000000119	2.43132	nm/s	Track	1000007492	1.81706	nm/s	Track	1000000527		1.84727		Track	1000000330	2.37355	nm/s	Track	1000000139					1.3641	nm/s	Track	1000000676	2.12278	nm/s	Track	1000000285		2.67195	nm/s	Track	1000000281	2.86179	nm/s	Track	1000000240	1.85734	nm/s	Track	1000000234
1.89422	nm/s	Track	1000000120	3.38909	nm/s	Track	1000007493	1.72342	nm/s	Track	1000000528		1.70669		Track	1000000332	1.80039	nm/s	Track	1000000140					2.02649	nm/s	Track	1000000699	1.99535	nm/s	Track	1000000286		1.82376	nm/s	Track	1000000282	0.976657	nm/s	Track	1000000243	2.0203	nm/s	Track	1000000236
1.50553	nm/s	Track	1000000121	2.13827	nm/s	Track	1000007494	2.14847	nm/s	Track	1000000529		2.60109		Track	1000000333	1.49817	nm/s	Track	1000000141					1.53291	nm/s	Track	1000000700	2.03192	nm/s	Track	1000000287		3.31516	nm/s	Track	1000000283	1.24431	nm/s	Track	1000000244	2.03166	nm/s	Track	1000000237
1.61696	nm/s	Track	1000000122	1.68625	nm/s	Track	1000007495	3.26891	nm/s	Track	1000000564		1.43958		Track	1000000335	1.44822	nm/s	Track	1000000145					1.22682	nm/s	Track	1000000701	1.72517	nm/s	Track	1000000331		2.03029	nm/s	Track	1000000284	0.833092	nm/s	Track	1000000245	2.1116	nm/s	Track	1000000240
1.88387	nm/s	Track	1000000123	1.94886	nm/s	Track	1000007496	2.49477	nm/s	Track	1000000568		1.42751		Track	1000000341	1.746	nm/s	Track	1000000146					1.35482	nm/s	Track	1000000702	2.62499	nm/s	Track	1000000332		2.856	nm/s	Track	1000000285	1.38291	nm/s	Track	1000000252	2.11783	nm/s	Track	1000000241
1.35518	nm/s	Track	1000000124	2.00433	nm/s	Track	1000007497	1.55653	nm/s	Track	1000000572		1.62415		Track	1000000342	1.97373	nm/s	Track	1000000147					1.22457	nm/s	Track	1000000717	2.64628	nm/s	Track	1000000345		2.34911	nm/s	Track	1000000286	1.39861	nm/s	Track	1000000254	2.18147	nm/s	Track	1000000242
2.1448	nm/s	Track	1000000125	1.63985	nm/s	Track	1000007498	1.3897	nm/s	Track	1000000573		1.36502		Track	1000000345	2.40386	nm/s	Track	1000000149					1.12789	nm/s	Track	1000000734	2.5068	nm/s	Track	1000000346		2.88934	nm/s	Track	1000000287	1.35767	nm/s	Track	1000000255	1.82063	nm/s	Track	1000000416
1.08232	nm/s	Track	1000000126	1.65966	nm/s	Track	1000007500	1.54925	nm/s	Track	1000000598		1.19743		Track	1000000346	2.11521	nm/s	Track	1000000150					1.38552	nm/s	Track	1000000767	2.07702	nm/s	Track	1000000349		3.2388	nm/s	Track	1000000289	1.12404	nm/s	Track	1000000257	1.89235	nm/s	Track	1000000459
1.22531	nm/s	Track	1000000127	1.49901	nm/s	Track	1000007501	1.45677	nm/s	Track	1000000601		1.10965		Track	1000000347	2.2478	nm/s	Track	1000000151					0.602531	nm/s	Track	1000000770	2.5941	nm/s	Track	1000000351		1.94142	nm/s	Track	1000000290	0.971262	nm/s	Track	1000000268	2.59967	nm/s	Track	1000000461
2.51844	nm/s	Track	1000000128	1.27669	nm/s	Track	1000007502	1.8815	nm/s	Track	1000000602		1.16321		Track	1000000348	2.34784	nm/s	Track	1000000152					1.13868	nm/s	Track	1000000771	1.97993	nm/s	Track	1000000352		2.72194	nm/s	Track	1000000291	1.60489	nm/s	Track	1000000269	1.94079	nm/s	Track	1000000462
2.62172	nm/s	Track	1000000129	1.38337	nm/s	Track	1000007523	2.78664	nm/s	Track	1000000606		1.02646		Track	1000000349	2.30999	nm/s	Track	1000000153					0.67957	nm/s	Track	1000000775	1.91921	nm/s	Track	1000000364		2.24932	nm/s	Track	1000000292	0.946492	nm/s	Track	1000000271	2.01705	nm/s	Track	1000000470
1.5885	nm/s	Track	1000000130	2.0121	nm/s	Track	1000007529	1.49174	nm/s	Track	1000000622		1.19455		Track	1000000352	2.32813	nm/s	Track	1000000154					1.06155	nm/s	Track	1000000776	1.76238	nm/s	Track	1000000366		2.46319	nm/s	Track	1000000293	1.03438	nm/s	Track	1000000272	2.05064	nm/s	Track	1000000483
1.7395	nm/s	Track	1000000131	1.61145	nm/s	Track	1000007530	2.48678	nm/s	Track	1000000623		1.71112		Track	1000000353	3.02296	nm/s	Track	1000000155					1.50735	nm/s	Track	1000000777	2.22292	nm/s	Track	1000000369		1.92193	nm/s	Track	1000000299	1.34158	nm/s	Track	1000000274	1.96968	nm/s	Track	1000000484
1.57078	nm/s	Track	1000000132	1.61342	nm/s	Track	1000007540	2.3768	nm/s	Track	1000000624		1.56971		Track	1000000354	1.99488	nm/s	Track	1000000158					1.18581	nm/s	Track	1000000778	2.63847	nm/s	Track	1000000373		2.39713	nm/s	Track	1000000301	1.68575	nm/s	Track	1000000279	2.11526	nm/s	Track	1000000486
1.95076	nm/s	Track	1000000133	2.46489	nm/s	Track	1000007541	2.15049	nm/s	Track	1000000632		0.769102		Track	1000000355	1.75893	nm/s	Track	1000000159					1.01947	nm/s	Track	1000000779	1.94742	nm/s	Track	1000000374		2.12208	nm/s	Track	1000000302	2.63655	nm/s	Track	1000000283	2.18925	nm/s	Track	1000000495
1.47536	nm/s	Track	1000000134	1.33859	nm/s	Track	1000007687	2.07041	nm/s	Track	1000000635		1.49178		Track	1000000358	2.25556	nm/s	Track	1000000161					1.15356	nm/s	Track	1000000780	2.10045	nm/s	Track	1000000375		2.148	nm/s	Track	1000000303	0.872959	nm/s	Track	1000000395	2.05091	nm/s	Track	1000000496
1.99237	nm/s	Track	1000000135	0.955635	nm/s	Track	1000007692	1.90635	nm/s	Track	1000000636		1.42916		Track	1000000359	2.00387	nm/s	Track	1000000164					0.814809	nm/s	Track	1000000781	2.75336	nm/s	Track	1000000376		2.37714	nm/s	Track	1000000304	1.85517	nm/s	Track	1000000645	1.9122	nm/s	Track	1000000497
1.72102	nm/s	Track	1000000136	0.733327	nm/s	Track	1000007962	1.95983	nm/s	Track	1000000641		0.529577		Track	1000000360	2.21587	nm/s	Track	1000000165					1.39271	nm/s	Track	1000000836	2.13603	nm/s	Track	1000000388		2.67727	nm/s	Track	1000000306	3.34741	nm/s	Track	1000000663	1.92112	nm/s	Track	1000000498
1.53447	nm/s	Track	1000000137	1.1578	nm/s	Track	1000007968	1.51101	nm/s	Track	1000000665		0.738332		Track	1000000361	1.98801	nm/s	Track	1000000168					1.36413	nm/s	Track	1000000843	1.77646	nm/s	Track	1000000394		1.7936	nm/s	Track	1000000307	4.49933	nm/s	Track	1000000670	2.01346	nm/s	Track	1000000499
1.56324	nm/s	Track	1000000138	0.818355	nm/s	Track	1000008031	1.25919	nm/s	Track	1000000668		1.31649		Track	1000000367	2.57809	nm/s	Track	1000000169					1.33273	nm/s	Track	1000000849	1.91053	nm/s	Track	1000000395		1.5561	nm/s	Track	1000000308	1.37887	nm/s	Track	1000000722	1.84452	nm/s	Track	1000000500
1.68262	nm/s	Track	1000000139	2.51383	nm/s	Track	1000008115	2.32392	nm/s	Track	1000000687		1.19148		Track	1000000368	2.38529	nm/s	Track	1000000170					2.06546	nm/s	Track	1000000852	2.19931	nm/s	Track	1000000396		1.7514	nm/s	Track	1000000309	2.07124	nm/s	Track	1000000992	2.21322	nm/s	Track	1000000541
2.867	nm/s	Track	1000000140	1.42459	nm/s	Track	1000008269	2.39239	nm/s	Track	1000000688		1.38915		Track	1000000369	1.82868	nm/s	Track	1000000171					0.759763	nm/s	Track	1000000853	2.60527	nm/s	Track	1000000397		2.5067	nm/s	Track	1000000310	2.66176	nm/s	Track	1000001004	2.78442	nm/s	Track	1000000566
2.35538	nm/s	Track	1000000141	2.10958	nm/s	Track	1000008270	1.18915	nm/s	Track	1000000690		1.34365		Track	1000000370	2.37	nm/s	Track	1000000172					1.52562	nm/s	Track	1000000856	2.34605	nm/s	Track	1000000399		1.81366	nm/s	Track	1000000311	3.74792	nm/s	Track	1000001940	2.43022	nm/s	Track	1000000573
2.35154	nm/s	Track	1000000142	1.95032	nm/s	Track	1000013167	1.4016	nm/s	Track	1000000691		1.28333		Track	1000000375	2.17347	nm/s	Track	1000000173					1.25062	nm/s	Track	1000000859	2.47727	nm/s	Track	1000000400		2.11007	nm/s	Track	1000000316	1.9643	nm/s	Track	1000002214	2.90406	nm/s	Track	1000000671
1.11901	nm/s	Track	1000000146	2.72564	nm/s	Track	1000013171	1.34376	nm/s	Track	1000000692		1.26091		Track	1000000377	2.86161	nm/s	Track	1000000174					1.34773	nm/s	Track	1000000864	1.98784	nm/s	Track	1000000403		2.23745	nm/s	Track	1000000317	3.80734	nm/s	Track	1000002618	3.40214	nm/s	Track	1000000714
1.81738	nm/s	Track	1000000147	2.11323	nm/s	Track	1000013173	1.48366	nm/s	Track	1000000693		1.25778		Track	1000000378	2.03302	nm/s	Track	1000000175					1.7038	nm/s	Track	1000000896	2.38158	nm/s	Track	1000000413		2.31636	nm/s	Track	1000000318	1.98144	nm/s	Track	1000002713	2.08617	nm/s	Track	1000000978
1.67748	nm/s	Track	1000000148	1.13748	nm/s	Track	1000013175	1.90287	nm/s	Track	1000000694		1.28278		Track	1000000379	2.12594	nm/s	Track	1000000176					2.35047	nm/s	Track	1000000901	2.07789	nm/s	Track	1000000432		1.74203	nm/s	Track	1000000319	3.22488	nm/s	Track	1000002832	2.33985	nm/s	Track	1000001014
1.68455	nm/s	Track	1000000149	2.42107	nm/s	Track	1000013178	2.97265	nm/s	Track	1000000695		1.03445		Track	1000000380	2.44577	nm/s	Track	1000000177					1.18607	nm/s	Track	1000000907	1.58404	nm/s	Track	1000000471		1.75878	nm/s	Track	1000000320	1.98235	nm/s	Track	1000002923	2.09426	nm/s	Track	1000001040
1.38238	nm/s	Track	1000000150	2.32923	nm/s	Track	1000013217	2.37326	nm/s	Track	1000000703		1.42219		Track	1000000381	1.59261	nm/s	Track	1000000180					1.47221	nm/s	Track	1000000910	2.33319	nm/s	Track	1000000554		1.90183	nm/s	Track	1000000322	3.11313	nm/s	Track	1000002955	1.73613	nm/s	Track	1000001082
1.95385	nm/s	Track	1000000151	1.21991	nm/s	Track	1000013218	1.24113	nm/s	Track	1000000704		0.702599		Track	1000000384	1.6771	nm/s	Track	1000000181					1.5013	nm/s	Track	1000000912	1.97962	nm/s	Track	1000000572		3.22094	nm/s	Track	1000000323	3.6793	nm/s	Track	1000002960	2.8532	nm/s	Track	1000001161
1.41267	nm/s	Track	1000000152	2.05375	nm/s	Track	1000013219	1.63324	nm/s	Track	1000000705		1.35649		Track	1000000385	2.91747	nm/s	Track	1000000198					1.03962	nm/s	Track	1000000915	3.26381	nm/s	Track	1000000624		2.09866	nm/s	Track	1000000324	4.9127	nm/s	Track	1000002961	2.18971	nm/s	Track	1000001167
1.83573	nm/s	Track	1000000153	1.49431	nm/s	Track	1000013270	2.10021	nm/s	Track	1000000706		1.07302		Track	1000000389	3.19951	nm/s	Track	1000000199					0.815775	nm/s	Track	1000000921	1.9011	nm/s	Track	1000000731		1.67872	nm/s	Track	1000000325	3.8058	nm/s	Track	1000002962	3.8566	nm/s	Track	1000001954
2.11353	nm/s	Track	1000000154	1.55256	nm/s	Track	1000013274	2.14091	nm/s	Track	1000000707		1.11841		Track	1000000390	2.54117	nm/s	Track	1000000200					1.14786	nm/s	Track	1000000927	1.81183	nm/s	Track	1000000753		1.57447	nm/s	Track	1000000326	4.76814	nm/s	Track	1000002963	1.59527	nm/s	Track	1000001955
1.94276	nm/s	Track	1000000155	1.98601	nm/s	Track	1000013278	1.64818	nm/s	Track	1000000708		1.38262		Track	1000000392	2.37358	nm/s	Track	1000000202					0.952781	nm/s	Track	1000000934	1.88807	nm/s	Track	1000000754		2.31926	nm/s	Track	1000000327	4.10099	nm/s	Track	1000002964	2.04002	nm/s	Track	1000002021
1.77749	nm/s	Track	1000000156	3.97762	nm/s	Track	1000013308	1.00389	nm/s	Track	1000000709		1.34305		Track	1000000395	2.48684	nm/s	Track	1000000209					1.2515	nm/s	Track	1000000938	2.09263	nm/s	Track	1000000756		2.71388	nm/s	Track	1000000328	4.36415	nm/s	Track	1000002965	3.96705	nm/s	Track	1000002151
1.44179	nm/s	Track	1000000157	2.09734	nm/s	Track	1000013309	1.982	nm/s	Track	1000000710		1.43967		Track	1000000409	2.84131	nm/s	Track	1000000211					1.26517	nm/s	Track	1000000949	3.16142	nm/s	Track	1000000816		1.79107	nm/s	Track	1000000329	2.82153	nm/s	Track	1000002966	3.08276	nm/s	Track	1000002423
2.23152	nm/s	Track	1000000158	1.7587	nm/s	Track	1000013310	2.02391	nm/s	Track	1000000711		1.49686		Track	1000000410	2.26363	nm/s	Track	1000000213					1.4424	nm/s	Track	1000000970	2.8681	nm/s	Track	1000000817		1.79272	nm/s	Track	1000000330	3.4129	nm/s	Track	1000002968	3.06152	nm/s	Track	1000003458
1.79217	nm/s	Track	1000000160	2.09572	nm/s	Track	1000013335	2.06923	nm/s	Track	1000000712		0.904084		Track	1000000412	2.51686	nm/s	Track	1000000215					1.46128	nm/s	Track	1000000973	2.42978	nm/s	Track	1000000826		1.70095	nm/s	Track	1000000333	2.20236	nm/s	Track	1000002969	2.52728	nm/s	Track	1000003495
2.30416	nm/s	Track	1000000161	2.1682	nm/s	Track	1000013336	2.00314	nm/s	Track	1000000714		2.21107		Track	1000000413	2.39513	nm/s	Track	1000000216					1.0909	nm/s	Track	1000000978	2.22841	nm/s	Track	1000000900		1.77886	nm/s	Track	1000000334	3.6507	nm/s	Track	1000002970	2.35625	nm/s	Track	1000003993
1.71225	nm/s	Track	1000000162	3.40029	nm/s	Track	1000013339	1.61616	nm/s	Track	1000000715		1.15755		Track	1000000414	2.491	nm/s	Track	1000000217					1.87867	nm/s	Track	1000000981	1.6905	nm/s	Track	1000000981		5.29109	nm/s	Track	1000000336	3.23212	nm/s	Track	1000002973	2.52579	nm/s	Track	1000003996
1.5736	nm/s	Track	1000000163	1.30398	nm/s	Track	1000013353	1.74355	nm/s	Track	1000000725		1.21785		Track	1000000415	2.30107	nm/s	Track	1000000218					3.84374	nm/s	Track	1000000988	2.71048	nm/s	Track	1000001049		3.07759	nm/s	Track	1000000338	3.05846	nm/s	Track	1000002974	1.85743	nm/s	Track	1000004565
1.87647	nm/s	Track	1000000164	1.89818	nm/s	Track	1000013354	2.65619	nm/s	Track	1000000726		0.914084		Track	1000000418	2.87217	nm/s	Track	1000000220					1.42294	nm/s	Track	1000000989	1.91082	nm/s	Track	1000001090		2.67941	nm/s	Track	1000000340	4.08931	nm/s	Track	1000002976	4.07036	nm/s	Track	1000005105
2.50936	nm/s	Track	1000000165	1.31898	nm/s	Track	1000013355	1.39538	nm/s	Track	1000000727		0.437074		Track	1000000423	1.7879	nm/s	Track	1000000221					3.34372	nm/s	Track	1000000990	2.11341	nm/s	Track	1000001092		1.37392	nm/s	Track	1000000342	3.74032	nm/s	Track	1000002977	2.81544	nm/s	Track	1000005116
0.987098	nm/s	Track	1000000166	1.44844	nm/s	Track	1000013374	1.55782	nm/s	Track	1000000728		1.23332		Track	1000000426	2.22978	nm/s	Track	1000000222					1.73539	nm/s	Track	1000000993	2.95815	nm/s	Track	1000001547		2.58453	nm/s	Track	1000000346	3.73134	nm/s	Track	1000002978	4.31414	nm/s	Track	1000005117
1.22906	nm/s	Track	1000000167	2.56217	nm/s	Track	1000013401	2.29749	nm/s	Track	1000000729		0.875896		Track	1000000428	1.62398	nm/s	Track	1000000223					0.887099	nm/s	Track	1000001030	1.82207	nm/s	Track	1000001645		2.09337	nm/s	Track	1000000349	2.10144	nm/s	Track	1000002979	3.35967	nm/s	Track	1000005118
2.46695	nm/s	Track	1000000168	2.46917	nm/s	Track	1000013430	1.78789	nm/s	Track	1000000730		0.933128		Track	1000000429	2.52277	nm/s	Track	1000000224					1.28373	nm/s	Track	1000001038	1.33082	nm/s	Track	1000001686		2.70788	nm/s	Track	1000000351	3.43435	nm/s	Track	1000002980	3.46419	nm/s	Track	1000005120
1.55208	nm/s	Track	1000000169	1.51182	nm/s	Track	1000013475	1.95909	nm/s	Track	1000000731		1.27743		Track	1000000431	2.35126	nm/s	Track	1000000227					2.14413	nm/s	Track	1000001039	2.37075	nm/s	Track	1000001779		2.26782	nm/s	Track	1000000354	2.08439	nm/s	Track	1000002981	2.94557	nm/s	Track	1000005121
1.38929	nm/s	Track	1000000170	1.18091	nm/s	Track	1000013477	1.9191	nm/s	Track	1000000732		0.73111		Track	1000000432	2.01878	nm/s	Track	1000000228					1.07419	nm/s	Track	1000001041	1.86242	nm/s	Track	1000002006		3.00031	nm/s	Track	1000000355	7.75226	nm/s	Track	1000002982	2.8791	nm/s	Track	1000005124
1.4623	nm/s	Track	1000000171	1.42052	nm/s	Track	1000013479	1.49876	nm/s	Track	1000000733		0.723857		Track	1000000434	1.73535	nm/s	Track	1000000229					0.964186	nm/s	Track	1000001043	2.17991	nm/s	Track	1000002157		2.06395	nm/s	Track	1000000356	4.75156	nm/s	Track	1000002983	3.25583	nm/s	Track	1000005125
1.7969	nm/s	Track	1000000172	1.57123	nm/s	Track	1000013480	1.42789	nm/s	Track	1000000735		1.17837		Track	1000000435	1.9275	nm/s	Track	1000000230					1.05609	nm/s	Track	1000001047	2.62123	nm/s	Track	1000002576		2.68727	nm/s	Track	1000000358	3.68282	nm/s	Track	1000002984
1.90106	nm/s	Track	1000000173	2.08466	nm/s	Track	1000013483	1.85903	nm/s	Track	1000000754		0.715745		Track	1000000436	2.26614	nm/s	Track	1000000231					1.05082	nm/s	Track	1000001048	3.01713	nm/s	Track	1000002601		2.8908	nm/s	Track	1000000360	3.74365	nm/s	Track	1000002985
1.18069	nm/s	Track	1000000174	1.97865	nm/s	Track	1000013552	1.67252	nm/s	Track	1000000755		0.982061		Track	1000000437	2.16618	nm/s	Track	1000000233					0.990222	nm/s	Track	1000001052	2.38193	nm/s	Track	1000002697		2.12744	nm/s	Track	1000000361	3.89696	nm/s	Track	1000002986
1.28608	nm/s	Track	1000000175	1.77851	nm/s	Track	1000013555	1.52155	nm/s	Track	1000000761		1.23086		Track	1000000438	2.56822	nm/s	Track	1000000234					1.11142	nm/s	Track	1000001063	2.36522	nm/s	Track	1000002763		2.83272	nm/s	Track	1000000362	3.31093	nm/s	Track	1000002987
1.95696	nm/s	Track	1000000176	2.66016	nm/s	Track	1000013556	2.19039	nm/s	Track	1000000771		1.19909		Track	1000000439	1.91413	nm/s	Track	1000000236					1.35645	nm/s	Track	1000001090	3.18395	nm/s	Track	1000003372		2.93151	nm/s	Track	1000000363	6.06523	nm/s	Track	1000002988
1.34301	nm/s	Track	1000000177	0.941101	nm/s	Track	1000013559	3.87195	nm/s	Track	1000000775		1.03718		Track	1000000440	1.94071	nm/s	Track	1000000237					1.0081	nm/s	Track	1000001096	3.06074	nm/s	Track	1000003376		2.5126	nm/s	Track	1000000364	2.15341	nm/s	Track	1000002989
1.63023	nm/s	Track	1000000178	1.57475	nm/s	Track	1000013560	1.25244	nm/s	Track	1000000776		1.30261		Track	1000000449	2.9978	nm/s	Track	1000000238					0.753184	nm/s	Track	1000001097	3.16691	nm/s	Track	1000003535		2.29144	nm/s	Track	1000000372	4.2888	nm/s	Track	1000002991
1.44946	nm/s	Track	1000000179	2.17279	nm/s	Track	1000013563	1.34697	nm/s	Track	1000000781		2.19936		Track	1000000450	1.75877	nm/s	Track	1000000239					2.08456	nm/s	Track	1000001098	2.39423	nm/s	Track	1000003576		2.16481	nm/s	Track	1000000373	3.2485	nm/s	Track	1000002992
1.84546	nm/s	Track	1000000180	1.3804	nm/s	Track	1000013564	1.89428	nm/s	Track	1000000782		0.825448		Track	1000000453	1.3697	nm/s	Track	1000000240					1.32889	nm/s	Track	1000001099	3.30655	nm/s	Track	1000003609		2.27377	nm/s	Track	1000000374	2.75934	nm/s	Track	1000002993
1.30444	nm/s	Track	1000000181	1.52578	nm/s	Track	1000013565	1.32428	nm/s	Track	1000000783		0.915811		Track	1000000471	1.50343	nm/s	Track	1000000242					1.27829	nm/s	Track	1000001100	2.27879	nm/s	Track	1000003610		1.96961	nm/s	Track	1000000376	4.37817	nm/s	Track	1000002994
2.87455	nm/s	Track	1000000182	1.64575	nm/s	Track	1000013566	1.65724	nm/s	Track	1000000786		0.897311		Track	1000000475	1.91839	nm/s	Track	1000000243					1.48812	nm/s	Track	1000001102	1.68444	nm/s	Track	1000004130		2.19676	nm/s	Track	1000000377	2.72483	nm/s	Track	1000002995
1.66438	nm/s	Track	1000000183	1.55889	nm/s	Track	1000013567	2.41809	nm/s	Track	1000000787		1.74903		Track	1000000480	1.97088	nm/s	Track	1000000250					1.03291	nm/s	Track	1000001103	2.35077	nm/s	Track	1000004252		2.06932	nm/s	Track	1000000378	4.23736	nm/s	Track	1000002996
7.29111	nm/s	Track	1000000184	1.95701	nm/s	Track	1000013568	1.88057	nm/s	Track	1000000791		0.567983		Track	1000000484	2.43846	nm/s	Track	1000000253					1.22882	nm/s	Track	1000001104	4.15498	nm/s	Track	1000004306		2.12366	nm/s	Track	1000000379	4.01976	nm/s	Track	1000002999
1.11198	nm/s	Track	1000000185	1.91196	nm/s	Track	1000013569	1.83078	nm/s	Track	1000000792		0.896152		Track	1000000486	1.48025	nm/s	Track	1000000257					1.45429	nm/s	Track	1000001106	2.3515	nm/s	Average			1.81051	nm/s	Track	1000000385	4.73729	nm/s	Track	1000003000
3.72902	nm/s	Track	1000000187	1.43954	nm/s	Track	1000013570	1.92603	nm/s	Track	1000000794		1.84143		Track	1000000489	1.82469	nm/s	Track	1000000260					0.70932	nm/s	Track	1000001107	0.673088	nm/s	STDW			1.6522	nm/s	Track	1000000386	3.78773	nm/s	Track	1000003001
2.56704	nm/s	Track	1000000188	1.62069	nm/s	Track	1000013593	2.20824	nm/s	Track	1000000795		0.876282		Track	1000000490	2.28252	nm/s	Track	1000000263					1.31063	nm/s	Track	1000001108						1.74686	nm/s	Track	1000000387	4.00469	nm/s	Track	1000003003
1.82951	nm/s	Track	1000000189	1.27931	nm/s	Track	1000013594	2.67321	nm/s	Track	1000000798		2.64954		Track	1000000492	2.42116	nm/s	Track	1000000264					1.32464	nm/s	Track	1000001120						2.06428	nm/s	Track	1000000388	2.82349	nm/s	Track	1000003004
2.62746	nm/s	Track	1000000190	1.48002	nm/s	Track	1000013595	1.36771	nm/s	Track	1000000807		1.14428		Track	1000000499	2.37727	nm/s	Track	1000000265					1.06346	nm/s	Track	1000001127						1.46028	nm/s	Track	1000000389	2.84733	nm/s	Track	1000003005
1.79085	nm/s	Track	1000000191	0.839414	nm/s	Track	1000013596	2.61769	nm/s	Track	1000000808		1.04116		Track	1000000501	1.97622	nm/s	Track	1000000266					2.13401	nm/s	Track	1000001130						1.90647	nm/s	Track	1000000390	2.61803	nm/s	Track	1000003007
1.59032	nm/s	Track	1000000192	1.10245	nm/s	Track	1000013597	1.84773	nm/s	Track	1000000809		1.44573		Track	1000000506	1.91253	nm/s	Track	1000000267					2.35991	nm/s	Track	1000001165						2.46163	nm/s	Track	1000000391	2.94259	nm/s	Track	1000003008
2.76847	nm/s	Track	1000000193	1.72954	nm/s	Track	1000013598	1.42353	nm/s	Track	1000000810		1.25488		Track	1000000507	1.42539	nm/s	Track	1000000269					0.9293	nm/s	Track	1000001176						2.9509	nm/s	Track	1000000392	2.9795	nm/s	Track	1000003009
1.7252	nm/s	Track	1000000194	1.53831	nm/s	Track	1000013599	1.68905	nm/s	Track	1000000811		0.964452		Track	1000000509	2.13196	nm/s	Track	1000000271					1.8701	nm/s	Track	1000001177						1.91148	nm/s	Track	1000000393	5.66756	nm/s	Track	1000003010
1.34046	nm/s	Track	1000000195	1.99034	nm/s	Track	1000013601	1.91302	nm/s	Track	1000000812		0.891986		Track	1000000510	2.27042	nm/s	Track	1000000272					1.93418	nm/s	Track	1000001283						2.53084	nm/s	Track	1000000394	2.35241	nm/s	Track	1000003011
1.40058	nm/s	Track	1000000196	1.87387	nm/s	Track	1000013602	1.08189	nm/s	Track	1000000813		1.15205		Track	1000000511	2.18594	nm/s	Track	1000000277					1.45273	nm/s	Track	1000001459						1.46149	nm/s	Track	1000000395	2.16201	nm/s	Track	1000003012
2.23945	nm/s	Track	1000000197	1.22105	nm/s	Track	1000013603	1.5181	nm/s	Track	1000000815		1.36266		Track	1000000512	1.61661	nm/s	Track	1000000278					1.54398	nm/s	Track	1000001535						1.66874	nm/s	Track	1000000397	3.886	nm/s	Track	1000003013
1.34914	nm/s	Track	1000000198	1.50523	nm/s	Track	1000013624	0.936695	nm/s	Track	1000000817		1.11975		Track	1000000515	2.4707	nm/s	Track	1000000280					1.62402	nm/s	Track	1000001563						1.8588	nm/s	Track	1000000398	3.1895	nm/s	Track	1000003014
1.91292	nm/s	Track	1000000199	2.29184	nm/s	Track	1000013625	1.78958	nm/s	Track	1000000818		0.790474		Track	1000000517	2.00889	nm/s	Track	1000000299					0.790327	nm/s	Track	1000001587						1.20966	nm/s	Track	1000000400	2.70229	nm/s	Track	1000003015
2.461	nm/s	Track	1000000200	1.6475	nm/s	Track	1000013626	1.20525	nm/s	Track	1000000819		0.992561		Track	1000000518	2.10016	nm/s	Track	1000000325					1.60464	nm/s	Track	1000001812						1.74932	nm/s	Track	1000000401	4.10798	nm/s	Track	1000003016
1.8324	nm/s	Track	1000000201	1.80088	nm/s	Track	1000013627	1.70161	nm/s	Track	1000000820		1.22203		Track	1000000519	2.21224	nm/s	Track	1000000326					2.06892	nm/s	Track	1000002109						1.80058	nm/s	Track	1000000404	1.09831	nm/s	Track	1000003048
1.53378	nm/s	Track	1000000202	2.00947	nm/s	Track	1000013648	1.63046	nm/s	Track	1000000821		1.27451		Track	1000000520	2.52045	nm/s	Track	1000000329					1.47685	nm/s	Track	1000002122						2.01472	nm/s	Track	1000000405	2.42958	nm/s	Track	1000003121
0.96879	nm/s	Track	1000000203	2.38355	nm/s	Track	1000013652	1.72668	nm/s	Track	1000000822		1.08895		Track	1000000522	2.57805	nm/s	Track	1000000336					0.798633	nm/s	Track	1000002178						3.10488	nm/s	Track	1000000450	5.71232	nm/s	Track	1000003125
1.77847	nm/s	Track	1000000204	2.13299	nm/s	Track	1000013655	1.78988	nm/s	Track	1000000823		1.05416		Track	1000000527	3.30739	nm/s	Track	1000000337					3.65803	nm/s	Track	1000002362						2.68862	nm/s	Track	1000000511	4.85383	nm/s	Track	1000003145
1.99716	nm/s	Track	1000000205	2.10614	nm/s	Track	1000013656	1.46143	nm/s	Track	1000000824		2.0526		Track	1000000534	2.88585	nm/s	Track	1000000338					3.78758	nm/s	Track	1000002366						3.63268	nm/s	Track	1000000519	3.16578	nm/s	Track	1000003158
2.4262	nm/s	Track	1000000206	1.69248	nm/s	Track	1000013657	2.682	nm/s	Track	1000000825		1.27494		Track	1000000535	1.41865	nm/s	Track	1000000339					1.29164	nm/s	Track	1000002367						2.94656	nm/s	Track	1000000525	2.63982	nm/s	Track	1000003390
1.85463	nm/s	Track	1000000207	1.74725	nm/s	Track	1000013658	1.95821	nm/s	Track	1000000826		1.10353		Track	1000000536	1.99511	nm/s	Track	1000000340					1.19876	nm/s	Track	1000002522						2.0195	nm/s	Track	1000000545	2.78699	nm/s	Track	1000003412
1.3895	nm/s	Track	1000000208	1.98292	nm/s	Track	1000013685	1.43058	nm/s	Track	1000000827		0.508821		Track	1000000541	2.08985	nm/s	Track	1000000343					2.90825	nm/s	Track	1000002823						3.70697	nm/s	Track	1000000555
1.39497	nm/s	Track	1000000209	0.973933	nm/s	Track	1000013690	1.54473	nm/s	Track	1000000828		0.607439		Track	1000000542	2.48381	nm/s	Track	1000000344					0.845102	nm/s	Track	1000002848						2.65173	nm/s	Track	1000000624
1.76415	nm/s	Track	1000000211	2.07701	nm/s	Track	1000013693	1.99702	nm/s	Track	1000000829		0.69764		Track	1000000543	2.15831	nm/s	Track	1000000346					1.21173	nm/s	Track	1000003054						1.85349	nm/s	Track	1000000662
1.90844	nm/s	Track	1000000212	1.98543	nm/s	Track	1000013695	1.67619	nm/s	Track	1000000830		1.24242		Track	1000000570	2.10721	nm/s	Track	1000000347					1.8235	nm/s	Track	1000003105						1.77487	nm/s	Track	1000000766
2.24122	nm/s	Track	1000000213	1.00757	nm/s	Track	1000013696	2.19678	nm/s	Track	1000000831		1.23939		Track	1000000582	1.78975	nm/s	Track	1000000349					2.63545	nm/s	Track	1000003337						3.65467	nm/s	Track	1000000892
1.24633	nm/s	Track	1000000214	1.20684	nm/s	Track	1000013697	1.54907	nm/s	Track	1000000832		1.12434		Track	1000000588	2.55432	nm/s	Track	1000000351					1.24905	nm/s	Track	1000003620						3.43757	nm/s	Track	1000000903
1.57417	nm/s	Track	1000000216	1.21842	nm/s	Track	1000013699	2.36659	nm/s	Track	1000000840		1.52442		Track	1000000606	2.62999	nm/s	Track	1000000352					3.73025	nm/s	Track	1000003625						3.22669	nm/s	Track	1000000956
1.4775	nm/s	Track	1000000217	1.47639	nm/s	Track	1000013700	1.88331	nm/s	Track	1000000843		2.45544		Track	1000000612	3.4951	nm/s	Track	1000000353					1.26671	nm/s	Track	1000003633						3.75466	nm/s	Track	1000001002
1.46051	nm/s	Track	1000000218	1.85146	nm/s	Track	1000013719	1.53023	nm/s	Track	1000000844		5.62176		Track	1000000619	2.5461	nm/s	Track	1000000354					0.971445	nm/s	Track	1000003642						2.3791	nm/s	Track	1000001003
1.32751	nm/s	Track	1000000219	2.01683	nm/s	Track	1000013721	1.51974	nm/s	Track	1000000845		3.13341		Track	1000000620	1.80318	nm/s	Track	1000000355					1.29776	nm/s	Track	1000004994						2.86096	nm/s	Track	1000001125
1.74281	nm/s	Track	1000000220	1.46155	nm/s	Track	1000013722	1.83922	nm/s	Track	1000000846		1.78954		Track	1000000624	1.94072	nm/s	Track	1000000357					1.95631	nm/s	Track	1000005028						1.34605	nm/s	Track	1000001335
1.31146	nm/s	Track	1000000221	1.28676	nm/s	Track	1000013723	1.61507	nm/s	Track	1000000847		1.67777		Track	1000000660	2.06622	nm/s	Track	1000000359					2.98586	nm/s	Track	1000007752						3.74359	nm/s	Track	1000001347
1.99083	nm/s	Track	1000000222	2.58624	nm/s	Track	1000013724	1.65073	nm/s	Track	1000000848		1.42188		Track	1000000664	2.27849	nm/s	Track	1000000360					1.41776	nm/s	Average							3.48928	nm/s	Track	1000001462
1.4942	nm/s	Track	1000000223	1.36086	nm/s	Track	1000013725	2.5362	nm/s	Track	1000000851		1.2353		Track	1000000687	1.81597	nm/s	Track	1000000361					0.57895	nm/s	STDW							2.72261	nm/s	Track	1000001638
2.76521	nm/s	Track	1000000224	0.865636	nm/s	Track	1000013749	1.38332	nm/s	Track	1000000852		1.33112		Track	1000000699	2.43728	nm/s	Track	1000000363														2.13002	nm/s	Track	1000002145
1.89237	nm/s	Track	1000000225	1.8382	nm/s	Track	1000013750	1.92923	nm/s	Track	1000000853		1.33219		Track	1000000700	1.47613	nm/s	Track	1000000364														2.94424	nm/s	Track	1000002553
1.58603	nm/s	Track	1000000226	1.60917	nm/s	Track	1000013751	2.2412	nm/s	Track	1000000855		1.4351		Track	1000000725	2.31779	nm/s	Track	1000000366														6.40279	nm/s	Track	1000002611
1.07419	nm/s	Track	1000000227	1.04079	nm/s	Track	1000013752	1.5429	nm/s	Track	1000000856		1.26901		Track	1000000731	1.56686	nm/s	Track	1000000367														3.43706	nm/s	Track	1000002703
2.27091	nm/s	Track	1000000228	0.996036	nm/s	Track	1000013753	2.05689	nm/s	Track	1000000857		1.17616		Track	1000000743	2.7949	nm/s	Track	1000000368														2.42643	nm/s	Track	1000003142
1.54502	nm/s	Track	1000000229	2.70586	nm/s	Track	1000013754	2.25662	nm/s	Track	1000000858		1.54415		Track	1000000744	1.22763	nm/s	Track	1000000370														2.252	nm/s	Track	1000003530
1.2568	nm/s	Track	1000000231	2.18074	nm/s	Track	1000013755	1.60564	nm/s	Track	1000000859		1.26045		Track	1000000745	1.10563	nm/s	Track	1000000372														2.40614	nm/s	Track	1000003535
1.41668	nm/s	Track	1000000232	2.49999	nm/s	Track	1000013756	1.84374	nm/s	Track	1000000860		1.18831		Track	1000000746	3.00524	nm/s	Track	1000000373														2.92103	nm/s	Track	1000003585
1.9836	nm/s	Track	1000000233	1.6668	nm/s	Track	1000013757	2.0097	nm/s	Track	1000000861		1.1207		Track	1000000747	1.34066	nm/s	Track	1000000374														4.26514	nm/s	Track	1000003719
1.78579	nm/s	Track	1000000234	2.56544	nm/s	Track	1000013782	1.86462	nm/s	Track	1000000862		1.13124		Track	1000000751	2.43118	nm/s	Track	1000000375														7.27535	nm/s	Track	1000004243
1.52705	nm/s	Track	1000000235	1.34416	nm/s	Track	1000013784	1.80054	nm/s	Track	1000000863		1.21322		Track	1000000757	1.2785	nm/s	Track	1000000376														5.88461	nm/s	Track	1000004246
1.35661	nm/s	Track	1000000236	1.34434	nm/s	Track	1000013785	2.06992	nm/s	Track	1000000864		1.15252		Track	1000000758	1.94889	nm/s	Track	1000000377														3.62777	nm/s	Track	1000005763
1.72498	nm/s	Track	1000000237	1.54432	nm/s	Track	1000013786	2.46505	nm/s	Track	1000000874		1.1784		Track	1000000761	1.24406	nm/s	Track	1000000378														2.46012	nm/s	Average		2.37529	nm/s	Average		2.29088	nm/s	Average
1.03447	nm/s	Track	1000000238	1.82769	nm/s	Track	1000013787	2.2422	nm/s	Track	1000000875		1.418		Track	1000000774	2.54968	nm/s	Track	1000000381														0.897064	nm/s	STDW		1.23284	nm/s	STDW		0.756827	nm/s	STDW
2.61686	nm/s	Track	1000000239	1.4805	nm/s	Track	1000013788	1.75274	nm/s	Track	1000000877		0.904953		Track	1000000775	2.08158	nm/s	Track	1000000382
1.88042	nm/s	Track	1000000240	1.03648	nm/s	Track	1000013789	1.87794	nm/s	Track	1000000879		0.815275		Track	1000000777	1.99308	nm/s	Track	1000000383
1.76459	nm/s	Track	1000000241	1.9959	nm/s	Track	1000013790	1.21528	nm/s	Track	1000000880		1.47156		Track	1000000778	2.63357	nm/s	Track	1000000384
1.42849	nm/s	Track	1000000242	1.27535	nm/s	Track	1000013792	1.17762	nm/s	Track	1000000881		1.33111		Track	1000000779	2.29806	nm/s	Track	1000000385
1.76196	nm/s	Track	1000000243	1.74956	nm/s	Track	1000013793	1.86372	nm/s	Track	1000000882		1.24918		Track	1000000780	2.24354	nm/s	Track	1000000386
1.25121	nm/s	Track	1000000244	2.12815	nm/s	Track	1000013794	2.74302	nm/s	Track	1000000883		1.47108		Track	1000000781	2.34041	nm/s	Track	1000000387
1.58211	nm/s	Track	1000000245	1.50873	nm/s	Track	1000013795	2.14523	nm/s	Track	1000000886		1.52502		Track	1000000782	2.38087	nm/s	Track	1000000388
1.34957	nm/s	Track	1000000246	1.54381	nm/s	Track	1000013796	1.78623	nm/s	Track	1000000887		0.880198		Track	1000000784	2.19606	nm/s	Track	1000000389
1.52471	nm/s	Track	1000000247	1.35895	nm/s	Track	1000013815	2.05292	nm/s	Track	1000000888		0.886787		Track	1000000794	2.50457	nm/s	Track	1000000390
1.44262	nm/s	Track	1000000248	1.48064	nm/s	Track	1000013818	2.23074	nm/s	Track	1000000889		1.28465		Track	1000000796	2.64585	nm/s	Track	1000000391
1.63494	nm/s	Track	1000000249	1.65356	nm/s	Track	1000013842	2.1441	nm/s	Track	1000000890		0.666395		Track	1000000801	2.26133	nm/s	Track	1000000392
1.61061	nm/s	Track	1000000250	1.4245	nm/s	Track	1000013843	1.69394	nm/s	Track	1000000891		1.44959		Track	1000000806	1.80054	nm/s	Track	1000000393
1.6051	nm/s	Track	1000000251	2.05216	nm/s	Track	1000013847	1.77222	nm/s	Track	1000000892		1.42839		Track	1000000813	1.5831	nm/s	Track	1000000394
1.5598	nm/s	Track	1000000252	2.06827	nm/s	Track	1000013865	2.2291	nm/s	Track	1000000893		0.832197		Track	1000000815	1.76627	nm/s	Track	1000000395
1.84604	nm/s	Track	1000000253	1.61664	nm/s	Track	1000013869	2.30631	nm/s	Track	1000000894		1.06559		Track	1000000816	1.97515	nm/s	Track	1000000396
1.90285	nm/s	Track	1000000254	1.40861	nm/s	Track	1000013870	2.31318	nm/s	Track	1000000896		1.47242		Track	1000000818	2.251	nm/s	Track	1000000397
1.9298	nm/s	Track	1000000256	1.90355	nm/s	Track	1000013871	2.43663	nm/s	Track	1000000898		1.05855		Track	1000000823	2.07207	nm/s	Track	1000000398
2.3777	nm/s	Track	1000000258	1.57894	nm/s	Track	1000013872	1.30609	nm/s	Track	1000000907		1.09665		Track	1000000825	1.60962	nm/s	Track	1000000399
1.76997	nm/s	Track	1000000260	2.08862	nm/s	Track	1000013873	1.59294	nm/s	Track	1000000908		1.77502		Track	1000000826	1.84755	nm/s	Track	1000000400
1.18596	nm/s	Track	1000000263	2.07904	nm/s	Track	1000013875	1.18192	nm/s	Track	1000000909		1.19447		Track	1000000827	1.65554	nm/s	Track	1000000401
2.28483	nm/s	Track	1000000266	2.59476	nm/s	Track	1000013876	1.91269	nm/s	Track	1000000912		1.27977		Track	1000000828	2.04559	nm/s	Track	1000000402
1.20721	nm/s	Track	1000000267	1.12338	nm/s	Track	1000013888	1.32675	nm/s	Track	1000000913		0.847786		Track	1000000831	1.46255	nm/s	Track	1000000403
1.97985	nm/s	Track	1000000268	1.35693	nm/s	Track	1000013890	1.90204	nm/s	Track	1000000917		1.59418		Track	1000000832	2.0434	nm/s	Track	1000000404
2.59392	nm/s	Track	1000000269	1.22115	nm/s	Track	1000013891	1.72978	nm/s	Track	1000000922		0.916619		Track	1000000838	2.46672	nm/s	Track	1000000405
1.53888	nm/s	Track	1000000270	2.23072	nm/s	Track	1000013892	1.43585	nm/s	Track	1000000926		1.43011		Track	1000000849	3.12081	nm/s	Track	1000000412
1.6326	nm/s	Track	1000000273	2.01048	nm/s	Track	1000013893	1.76825	nm/s	Track	1000000927		1.6628		Track	1000000855	2.52041	nm/s	Track	1000000417
2.32607	nm/s	Track	1000000274	1.99379	nm/s	Track	1000013911	2.4625	nm/s	Track	1000000929		1.11239		Track	1000000872	1.64401	nm/s	Track	1000000418
2.47134	nm/s	Track	1000000275	2.40658	nm/s	Track	1000013942	2.28887	nm/s	Track	1000000930		1.48319		Track	1000000873	1.8379	nm/s	Track	1000000419
2.28241	nm/s	Track	1000000277	1.64326	nm/s	Track	1000013947	1.87655	nm/s	Track	1000000932		1.85179		Track	1000000874	1.87968	nm/s	Track	1000000421
1.07323	nm/s	Track	1000000278	2.36395	nm/s	Track	1000013982	1.55083	nm/s	Track	1000000933		0.841288		Track	1000000876	2.28332	nm/s	Track	1000000423
1.54264	nm/s	Track	1000000280	2.9347	nm/s	Track	1000014093	1.73512	nm/s	Track	1000000934		1.4092		Track	1000000877	2.06553	nm/s	Track	1000000424
1.48992	nm/s	Track	1000000281	1.21325	nm/s	Track	1000014197	2.06854	nm/s	Track	1000000935		2.04786		Track	1000000878	2.18068	nm/s	Track	1000000425
1.65641	nm/s	Track	1000000282	1.27542	nm/s	Track	1000014203	1.28943	nm/s	Track	1000000936		1.43814		Track	1000000879	2.27462	nm/s	Track	1000000426
1.04327	nm/s	Track	1000000283	2.34823	nm/s	Track	1000014350	1.72905	nm/s	Track	1000000946		0.654527		Track	1000000880	2.46522	nm/s	Track	1000000427
2.44689	nm/s	Track	1000000284	1.23223	nm/s	Track	1000014550	1.48993	nm/s	Track	1000000947		0.802674		Track	1000000881	2.44269	nm/s	Track	1000000432
1.65733	nm/s	Track	1000000285	1.54935	nm/s	Track	1000014609	1.9749	nm/s	Track	1000000948		1.67339		Track	1000000882	2.36884	nm/s	Track	1000000433
1.68355	nm/s	Track	1000000288	1.07037	nm/s	Track	1000014947	1.99627	nm/s	Track	1000000949		1.51209		Track	1000000886	1.35578	nm/s	Track	1000000434
1.55305	nm/s	Track	1000000289	2.46968	nm/s	Track	1000016103	1.69078	nm/s	Track	1000000950		1.60091		Track	1000000887	1.95766	nm/s	Track	1000000435
1.99861	nm/s	Track	1000000290	1.24417	nm/s	Track	1000016426	1.30413	nm/s	Track	1000000951		1.39944		Track	1000000889	2.35821	nm/s	Track	1000000438
1.6536	nm/s	Track	1000000291	1.7564	nm/s	Average		1.28531	nm/s	Track	1000000952		0.661155		Track	1000000890	2.04173	nm/s	Track	1000000440
1.45406	nm/s	Track	1000000292	0.526736	nm/s	STDW		1.54813	nm/s	Track	1000000953		1.21056		Track	1000000895	2.09962	nm/s	Track	1000000441
1.90911	nm/s	Track	1000000293					1.43695	nm/s	Track	1000000954		1.6818		Track	1000000898	2.76392	nm/s	Track	1000000442
1.28417	nm/s	Track	1000000294					1.43141	nm/s	Track	1000000955		1.02093		Track	1000000900	1.9082	nm/s	Track	1000000444
1.00871	nm/s	Track	1000000295					1.83041	nm/s	Track	1000000956		1.27144		Track	1000000901	2.40597	nm/s	Track	1000000445
2.00125	nm/s	Track	1000000296					2.02047	nm/s	Track	1000000957		1.83518		Track	1000000902	2.65562	nm/s	Track	1000000446
1.58037	nm/s	Track	1000000297					1.46521	nm/s	Track	1000000958		2.55671		Track	1000000904	2.30929	nm/s	Track	1000000462
1.46908	nm/s	Track	1000000298					1.81979	nm/s	Track	1000000960		0.937231		Track	1000000905	2.49604	nm/s	Track	1000000464
1.6488	nm/s	Track	1000000299					2.28196	nm/s	Track	1000000961		1.23312		Track	1000000908	3.09102	nm/s	Track	1000000471
1.82142	nm/s	Track	1000000301					2.23195	nm/s	Track	1000000962		1.90387		Track	1000000910	2.05697	nm/s	Track	1000000477
1.80146	nm/s	Track	1000000303					1.43477	nm/s	Track	1000000963		2.92538		Track	1000000911	1.64353	nm/s	Track	1000000480
1.82741	nm/s	Track	1000000304					3.02126	nm/s	Track	1000000964		1.16901		Track	1000000919	1.43147	nm/s	Track	1000000485
1.63587	nm/s	Track	1000000305					1.26699	nm/s	Track	1000000966		2.70552		Track	1000000921	1.02436	nm/s	Track	1000000486
2.20567	nm/s	Track	1000000309					1.54256	nm/s	Track	1000000967		0.694091		Track	1000000938	2.13703	nm/s	Track	1000000487
1.76358	nm/s	Track	1000000313					1.40127	nm/s	Track	1000000968		1.0314		Track	1000000939	3.69133	nm/s	Track	1000000489
1.4905	nm/s	Track	1000000316					3.0722	nm/s	Track	1000000969		1.332		Track	1000000940	2.26427	nm/s	Track	1000000494
1.86968	nm/s	Track	1000000318					2.07466	nm/s	Track	1000000970		1.42742		Track	1000000941	1.47022	nm/s	Track	1000000496
1.6387	nm/s	Track	1000000319					1.96825	nm/s	Track	1000000971		0.888536		Track	1000000942	1.94114	nm/s	Track	1000000499
1.59819	nm/s	Track	1000000320					1.95093	nm/s	Track	1000000972		1.13073		Track	1000000946	2.26788	nm/s	Track	1000000502
1.46286	nm/s	Track	1000000323					1.17902	nm/s	Track	1000000973		1.86628		Track	1000000947	3.25962	nm/s	Track	1000000505
1.60294	nm/s	Track	1000000324					1.56602	nm/s	Track	1000000974		0.75184		Track	1000000948	1.99336	nm/s	Track	1000000507
4.28535	nm/s	Track	1000000326					1.27105	nm/s	Track	1000000975		0.84875		Track	1000000949	1.41199	nm/s	Track	1000000512
1.45726	nm/s	Track	1000000327					1.70859	nm/s	Track	1000000978		0.630093		Track	1000000951	4.31284	nm/s	Track	1000000516
2.64829	nm/s	Track	1000000328					2.07721	nm/s	Track	1000000979		1.67184		Track	1000000952	2.07225	nm/s	Track	1000000530
2.22067	nm/s	Track	1000000330					1.45925	nm/s	Track	1000000986		1.25931		Track	1000000953	1.41653	nm/s	Track	1000000535
1.7397	nm/s	Track	1000000332					1.66052	nm/s	Track	1000000987		0.526774		Track	1000000954	2.32224	nm/s	Track	1000000539
1.63986	nm/s	Track	1000000333					1.62208	nm/s	Track	1000000988		0.685211		Track	1000000955	2.49596	nm/s	Track	1000000541
1.24587	nm/s	Track	1000000334					1.57046	nm/s	Track	1000000989		1.16984		Track	1000000958	1.77681	nm/s	Track	1000000550
3.23141	nm/s	Track	1000000335					1.79966	nm/s	Track	1000000990		2.54434		Track	1000000959	2.7447	nm/s	Track	1000000553
1.62698	nm/s	Track	1000000337					1.72136	nm/s	Track	1000000991		0.573821		Track	1000000990	1.85698	nm/s	Track	1000000556
1.64984	nm/s	Track	1000000340					1.98769	nm/s	Track	1000000992		1.20603		Track	1000000991	2.76129	nm/s	Track	1000000620
1.49932	nm/s	Track	1000000342					1.5504	nm/s	Track	1000000993		1.04341		Track	1000000992	2.33997	nm/s	Track	1000000621
2.0339	nm/s	Track	1000000343					1.76149	nm/s	Track	1000000994		1.0299		Track	1000000994	2.35068	nm/s	Track	1000000622
1.76867	nm/s	Track	1000000344					2.11901	nm/s	Track	1000000996		1.09226		Track	1000000995	2.11564	nm/s	Track	1000000623
2.16369	nm/s	Track	1000000345					2.03122	nm/s	Track	1000000998		1.02869		Track	1000000997	1.58376	nm/s	Track	1000000624
1.54503	nm/s	Track	1000000346					1.84314	nm/s	Track	1000000999		1.17447		Track	1000000998	1.59758	nm/s	Track	1000000625
2.66849	nm/s	Track	1000000348					1.38984	nm/s	Track	1000001000		0.823714		Track	1000001003	2.03232	nm/s	Track	1000000626
1.60815	nm/s	Track	1000000349					1.80953	nm/s	Track	1000001001		1.89266		Track	1000001004	2.12364	nm/s	Track	1000000627
2.37576	nm/s	Track	1000000350					1.52151	nm/s	Track	1000001002		1.29832		Track	1000001007	2.23083	nm/s	Track	1000000628
1.80406	nm/s	Track	1000000351					1.95905	nm/s	Track	1000001004		0.840117		Track	1000001008	2.25505	nm/s	Track	1000000631
1.90558	nm/s	Track	1000000352					1.46211	nm/s	Track	1000001005		1.08652		Track	1000001009	2.51355	nm/s	Track	1000000636
1.95295	nm/s	Track	1000000353					1.56414	nm/s	Track	1000001006		2.70351		Track	1000001010	2.30228	nm/s	Track	1000000641
1.86161	nm/s	Track	1000000354					2.27331	nm/s	Track	1000001007		0.985222		Track	1000001011	2.00911	nm/s	Track	1000000652
1.32721	nm/s	Track	1000000355					2.1542	nm/s	Track	1000001008		1.91569		Track	1000001015	4.47002	nm/s	Track	1000000666
1.67169	nm/s	Track	1000000356					2.24768	nm/s	Track	1000001009		1.08553		Track	1000001051	1.47963	nm/s	Track	1000000672
1.37915	nm/s	Track	1000000357					1.66526	nm/s	Track	1000001010		1.40065		Track	1000001054	1.26654	nm/s	Track	1000000673
1.82304	nm/s	Track	1000000358					1.70841	nm/s	Track	1000001011		1.46621		Track	1000001056	2.47907	nm/s	Track	1000000677
1.39547	nm/s	Track	1000000359					1.85831	nm/s	Track	1000001012		1.16819		Track	1000001066	2.2409	nm/s	Track	1000000681
1.49289	nm/s	Track	1000000360					1.77288	nm/s	Track	1000001014		1.36641		Track	1000001087	2.04191	nm/s	Track	1000000683
1.33453	nm/s	Track	1000000361					1.87789	nm/s	Track	1000001015		1.54565		Track	1000001090	1.83728	nm/s	Track	1000000686
1.52109	nm/s	Track	1000000362					2.43243	nm/s	Track	1000001016		2.00364		Track	1000001091	2.06319	nm/s	Track	1000000687
1.48695	nm/s	Track	1000000363					2.72463	nm/s	Track	1000001017		1.48323		Track	1000001228	2.78104	nm/s	Track	1000000721
1.99156	nm/s	Track	1000000364					2.0932	nm/s	Track	1000001018		1.27919		Track	1000001270	2.04187	nm/s	Track	1000000731
1.3742	nm/s	Track	1000000365					1.492	nm/s	Track	1000001019		1.6709		Track	1000001437	2.37541	nm/s	Track	1000000764
1.79197	nm/s	Track	1000000366					1.7542	nm/s	Track	1000001020		0.600043		Track	1000001544	2.79123	nm/s	Track	1000000778
1.57384	nm/s	Track	1000000367					1.81375	nm/s	Track	1000001021		2.77996		Track	1000001853	4.51607	nm/s	Track	1000000783
1.74391	nm/s	Track	1000000368					1.88481	nm/s	Track	1000001027		1.71928		Track	1000001951	2.20758	nm/s	Track	1000000785
2.48529	nm/s	Track	1000000369					1.87459	nm/s	Track	1000001028		3.23138		Track	1000001971	2.56079	nm/s	Track	1000000786
1.40661	nm/s	Track	1000000370					1.81982	nm/s	Track	1000001029		1.26691		Track	1000002027	2.26935	nm/s	Track	1000000796
1.35969	nm/s	Track	1000000371					2.42997	nm/s	Track	1000001032		1.68175		Track	1000002432	1.97988	nm/s	Track	1000000797
1.62886	nm/s	Track	1000000372					1.44757	nm/s	Track	1000001033		0.803957		Track	1000002513	2.10138	nm/s	Track	1000000800
1.52452	nm/s	Track	1000000373					2.34543	nm/s	Track	1000001034		1.71895		Track	1000002542	1.36913	nm/s	Track	1000000808
2.48636	nm/s	Track	1000000374					1.7878	nm/s	Track	1000001035		0.923537		Track	1000002653	1.95115	nm/s	Track	1000000809
2.46528	nm/s	Track	1000000375					1.45057	nm/s	Track	1000001037		0.995217		Track	1000002656	2.10907	nm/s	Track	1000000814
2.62303	nm/s	Track	1000000376					1.83728	nm/s	Track	1000001041		1.21738		Track	1000002666	2.51134	nm/s	Track	1000000822
1.30866	nm/s	Track	1000000377					1.66712	nm/s	Track	1000001042		1.39438		Track	1000002935	2.24456	nm/s	Track	1000000823
1.2889	nm/s	Track	1000000378					2.32988	nm/s	Track	1000001045		1.64215		Track	1000003080	3.01775	nm/s	Track	1000000884
1.77547	nm/s	Track	1000000379					2.00465	nm/s	Track	1000001046		1.44108		Track	1000003093	1.04251	nm/s	Track	1000000890
1.41713	nm/s	Track	1000000380					2.04334	nm/s	Track	1000001048		1.48764		Track	1000003157	1.64346	nm/s	Track	1000000924
1.94833	nm/s	Track	1000000381					2.30853	nm/s	Track	1000001050		1.91676		Track	1000003304	2.04518	nm/s	Track	1000000937
1.59224	nm/s	Track	1000000382					2.65411	nm/s	Track	1000001052		2.03846		Track	1000003490	2.38788	nm/s	Track	1000000938
0.780989	nm/s	Track	1000000384					1.71906	nm/s	Track	1000001053		1.17735		Track	1000003607	1.90602	nm/s	Track	1000000941
2.7965	nm/s	Track	1000000385					1.54059	nm/s	Track	1000001067		1.69094		Track	1000003609	3.39231	nm/s	Track	1000000959
1.95388	nm/s	Track	1000000386					1.54247	nm/s	Track	1000001069		1.74919		Track	1000003631	1.58381	nm/s	Track	1000000971
1.74466	nm/s	Track	1000000387					1.67008	nm/s	Track	1000001070		1.3456	nm/s	Average		2.15387	nm/s	Track	1000000985
1.93208	nm/s	Track	1000000389					1.33645	nm/s	Track	1000001071		0.533841	nm/s	STDW		1.78617	nm/s	Track	1000001050
2.1316	nm/s	Track	1000000390					1.40405	nm/s	Track	1000001074						3.18172	nm/s	Track	1000001066
1.53825	nm/s	Track	1000000391					1.73668	nm/s	Track	1000001076						2.22178	nm/s	Track	1000001126
2.56884	nm/s	Track	1000000392					2.12559	nm/s	Track	1000001079						2.46811	nm/s	Track	1000001128
1.1997	nm/s	Track	1000000393					1.68578	nm/s	Track	1000001080						2.05147	nm/s	Track	1000001147
2.16192	nm/s	Track	1000000394					2.60921	nm/s	Track	1000001082						2.80952	nm/s	Track	1000001267
2.44526	nm/s	Track	1000000395					2.0517	nm/s	Track	1000001083						2.4226	nm/s	Track	1000001280
1.91526	nm/s	Track	1000000397					1.80046	nm/s	Track	1000001084						1.93783	nm/s	Track	1000001284
1.08992	nm/s	Track	1000000398					2.03721	nm/s	Track	1000001085						2.41442	nm/s	Track	1000001292
1.28705	nm/s	Track	1000000399					1.92074	nm/s	Track	1000001087						2.46076	nm/s	Track	1000001382
1.51662	nm/s	Track	1000000400					1.65435	nm/s	Track	1000001088						2.55756	nm/s	Track	1000001420
2.15977	nm/s	Track	1000000401					2.14204	nm/s	Track	1000001089						2.35295	nm/s	Track	1000001499
1.40631	nm/s	Track	1000000402					1.62709	nm/s	Track	1000001090						2.76494	nm/s	Track	1000001815
1.69524	nm/s	Track	1000000403					1.2682	nm/s	Track	1000001091						2.80819	nm/s	Track	1000001819
1.35086	nm/s	Track	1000000404					1.1129	nm/s	Track	1000001092						3.553	nm/s	Track	1000001820
1.86654	nm/s	Track	1000000405					2.14891	nm/s	Track	1000001093						2.25869	nm/s	Track	1000001821
1.51993	nm/s	Track	1000000406					1.81554	nm/s	Track	1000001094						1.60074	nm/s	Track	1000001825
2.09889	nm/s	Track	1000000407					1.64035	nm/s	Track	1000001095						1.78858	nm/s	Track	1000001826
2.74587	nm/s	Track	1000000411					1.79895	nm/s	Track	1000001096						2.18645	nm/s	Track	1000001829
4.34535	nm/s	Track	1000000413					1.40971	nm/s	Track	1000001097						1.63419	nm/s	Track	1000001831
1.92445	nm/s	Track	1000000414					1.49211	nm/s	Track	1000001104						2.31445	nm/s	Track	1000001833
1.81879	nm/s	Track	1000000415					1.51266	nm/s	Track	1000001105						2.05332	nm/s	Track	1000001835
2.74645	nm/s	Track	1000000416					1.42859	nm/s	Track	1000001109						3.39499	nm/s	Track	1000001841
2.20706	nm/s	Track	1000000417					2.86683	nm/s	Track	1000001110						1.66912	nm/s	Track	1000001846
2.48227	nm/s	Track	1000000418					1.66909	nm/s	Track	1000001111						1.65704	nm/s	Track	1000001849
1.68122	nm/s	Track	1000000420					2.06539	nm/s	Track	1000001112						1.93511	nm/s	Track	1000001861
1.06459	nm/s	Track	1000000421					1.74736	nm/s	Track	1000001115						2.54445	nm/s	Track	1000001918
1.1182	nm/s	Track	1000000422					2.12229	nm/s	Track	1000001117						1.72964	nm/s	Track	1000001979
2.06802	nm/s	Track	1000000423					1.83889	nm/s	Track	1000001119						3.31457	nm/s	Track	1000002010
1.07808	nm/s	Track	1000000424					1.71048	nm/s	Track	1000001121						1.99934	nm/s	Track	1000002072
1.27733	nm/s	Track	1000000425					1.73742	nm/s	Track	1000001122						3.31871	nm/s	Track	1000002078
1.43164	nm/s	Track	1000000426					2.10628	nm/s	Track	1000001123						2.90971	nm/s	Track	1000002176
1.47837	nm/s	Track	1000000427					3.14713	nm/s	Track	1000001124						2.85841	nm/s	Track	1000002336
1.19002	nm/s	Track	1000000428					1.40792	nm/s	Track	1000001125						2.68313	nm/s	Track	1000002420
2.16003	nm/s	Track	1000000429					1.73887	nm/s	Track	1000001126						3.28516	nm/s	Track	1000002535
1.2239	nm/s	Track	1000000430					1.89433	nm/s	Track	1000001127						3.17005	nm/s	Track	1000002760
1.36251	nm/s	Track	1000000431					1.65338	nm/s	Track	1000001128						3.79633	nm/s	Track	1000002766
1.81978	nm/s	Track	1000000432					2.21868	nm/s	Track	1000001129						2.78223	nm/s	Track	1000002854
1.56307	nm/s	Track	1000000433					1.78087	nm/s	Track	1000001130						2.58289	nm/s	Track	1000002882
2.46468	nm/s	Track	1000000435					1.59794	nm/s	Track	1000001131						2.52576	nm/s	Track	1000002942
3.29751	nm/s	Track	1000000436					1.09576	nm/s	Track	1000001138						2.65296	nm/s	Track	1000003105
1.96526	nm/s	Track	1000000437					1.65454	nm/s	Track	1000001141						2.51825	nm/s	Track	1000003194
0.695189	nm/s	Track	1000000438					1.97667	nm/s	Track	1000001142						2.70746	nm/s	Track	1000003236
1.83606	nm/s	Track	1000000439					1.93293	nm/s	Track	1000001143						2.46508	nm/s	Track	1000003255
1.6638	nm/s	Track	1000000440					1.1949	nm/s	Track	1000001146						2.87415	nm/s	Track	1000003279
1.36873	nm/s	Track	1000000441					1.70909	nm/s	Track	1000001147						3.10494	nm/s	Track	1000003361
1.51255	nm/s	Track	1000000442					1.71258	nm/s	Track	1000001148						2.80559	nm/s	Track	1000003405
1.49763	nm/s	Track	1000000443					1.22751	nm/s	Track	1000001149						1.93572	nm/s	Track	1000003684
1.93336	nm/s	Track	1000000444					2.02074	nm/s	Track	1000001152						3.75015	nm/s	Track	1000003687
2.86634	nm/s	Track	1000000445					1.77661	nm/s	Track	1000001154						1.5903	nm/s	Track	1000003698
2.35121	nm/s	Track	1000000446					1.8883	nm/s	Track	1000001156						2.72188	nm/s	Track	1000004499
1.32032	nm/s	Track	1000000448					2.01833	nm/s	Track	1000001157						2.80842	nm/s	Track	1000005010
1.21863	nm/s	Track	1000000451					1.67591	nm/s	Track	1000001158						3.1419	nm/s	Track	1000005942
1.77901	nm/s	Track	1000000452					2.68799	nm/s	Track	1000001161						1.99632	nm/s	Track	1000005943
2.5117	nm/s	Track	1000000454					1.80035	nm/s	Track	1000001162						2.91435	nm/s	Track	1000005948
1.60159	nm/s	Track	1000000456					1.86651	nm/s	Track	1000001163						2.91948	nm/s	Track	1000005949
1.69053	nm/s	Track	1000000457					1.86431	nm/s	Track	1000001167						2.2636	nm/s	Average
1.49911	nm/s	Track	1000000460					2.01979	nm/s	Track	1000001168						0.531145	nm/s	STDW
1.80926	nm/s	Track	1000000461					1.3022	nm/s	Track	1000001170
1.91143	nm/s	Track	1000000462					1.8098	nm/s	Track	1000001171
1.59028	nm/s	Track	1000000463					1.68042	nm/s	Track	1000001176
1.09135	nm/s	Track	1000000464					1.65575	nm/s	Track	1000001201
1.98426	nm/s	Track	1000000465					1.48235	nm/s	Track	1000001204
1.40131	nm/s	Track	1000000466					1.57224	nm/s	Track	1000001205
1.92564	nm/s	Track	1000000467					2.5877	nm/s	Track	1000001208
3.1696	nm/s	Track	1000000468					1.75528	nm/s	Track	1000001209
1.87237	nm/s	Track	1000000469					1.66238	nm/s	Track	1000001210
2.38967	nm/s	Track	1000000470					2.09462	nm/s	Track	1000001212
1.16823	nm/s	Track	1000000471					1.60113	nm/s	Track	1000001214
1.962	nm/s	Track	1000000472					1.25997	nm/s	Track	1000001215
1.27154	nm/s	Track	1000000473					2.42846	nm/s	Track	1000001216
2.4697	nm/s	Track	1000000474					2.29534	nm/s	Track	1000001221
1.65275	nm/s	Track	1000000476					1.75882	nm/s	Track	1000001222
1.21481	nm/s	Track	1000000477					2.52658	nm/s	Track	1000001223
1.77551	nm/s	Track	1000000478					2.27246	nm/s	Track	1000001224
1.4839	nm/s	Track	1000000479					1.87349	nm/s	Track	1000001253
1.59253	nm/s	Track	1000000481					2.08745	nm/s	Track	1000001258
1.37692	nm/s	Track	1000000482					2.28339	nm/s	Track	1000001259
1.0366	nm/s	Track	1000000483					2.847	nm/s	Track	1000001265
1.76379	nm/s	Track	1000000484					2.58357	nm/s	Track	1000001414
2.18317	nm/s	Track	1000000485					1.11392	nm/s	Track	1000001442
2.12338	nm/s	Track	1000000486					1.79828	nm/s	Track	1000001534
1.9743	nm/s	Track	1000000487					1.36665	nm/s	Track	1000001564
2.05051	nm/s	Track	1000000488					1.15805	nm/s	Track	1000001578
2.19864	nm/s	Track	1000000489					1.52006	nm/s	Track	1000001608
1.74658	nm/s	Track	1000000490					1.91134	nm/s	Track	1000001708
1.80696	nm/s	Track	1000000491					1.51909	nm/s	Track	1000001886
1.74496	nm/s	Track	1000000492					2.12615	nm/s	Track	1000001975
2.81616	nm/s	Track	1000000493					2.06958	nm/s	Track	1000001978
1.70664	nm/s	Track	1000000494					2.98595	nm/s	Track	1000002154
1.57508	nm/s	Track	1000000495					2.01982	nm/s	Track	1000002221
1.7707	nm/s	Track	1000000496					2.65984	nm/s	Track	1000002227
1.60393	nm/s	Track	1000000497					2.76462	nm/s	Track	1000002231
1.95994	nm/s	Track	1000000498					2.69095	nm/s	Track	1000002313
1.81465	nm/s	Track	1000000499					3.26578	nm/s	Track	1000002352
1.67666	nm/s	Track	1000000500					1.78569	nm/s	Track	1000002383
1.95933	nm/s	Track	1000000501					1.4811	nm/s	Track	1000002439
1.59949	nm/s	Track	1000000502					2.34699	nm/s	Track	1000002448
1.51826	nm/s	Track	1000000503					1.60632	nm/s	Track	1000002487
1.80487	nm/s	Track	1000000504					3.65194	nm/s	Track	1000002635
1.79227	nm/s	Track	1000000505					3.5758	nm/s	Track	1000002721
1.85952	nm/s	Track	1000000506					2.4373	nm/s	Track	1000002760
1.47943	nm/s	Track	1000000507					2.12452	nm/s	Track	1000002962
2.20353	nm/s	Track	1000000508					2.8354	nm/s	Track	1000003393
1.97772	nm/s	Track	1000000509					2.27265	nm/s	Track	1000004684
1.61126	nm/s	Track	1000000510					1.84741	nm/s	Track	1000004804
1.32653	nm/s	Track	1000000511					2.5884	nm/s	Track	1000010092
1.59261	nm/s	Track	1000000512					1.56512	nm/s	Track	1000010093
1.71238	nm/s	Track	1000000513					1.44241	nm/s	Track	1000010094
2.885	nm/s	Track	1000000514					2.21647	nm/s	Track	1000010095
2.43038	nm/s	Track	1000000515					3.03599	nm/s	Track	1000010096
3.28069	nm/s	Track	1000000518					2.92057	nm/s	Track	1000010098
1.31226	nm/s	Track	1000000519					2.39781	nm/s	Track	1000010099
1.64342	nm/s	Track	1000000520					4.24736	nm/s	Track	1000010100
1.9355	nm/s	Track	1000000521					2.16204	nm/s	Track	1000010101
1.61724	nm/s	Track	1000000524					4.11136	nm/s	Track	1000010102
1.94921	nm/s	Track	1000000525					2.64174	nm/s	Track	1000010104
1.6965	nm/s	Track	1000000527					2.22762	nm/s	Track	1000010105
1.23261	nm/s	Track	1000000528					4.19387	nm/s	Track	1000010106
1.73574	nm/s	Track	1000000529					3.34628	nm/s	Track	1000010115
1.38535	nm/s	Track	1000000531					3.66652	nm/s	Track	1000010143
1.40626	nm/s	Track	1000000534					1.90839	nm/s	Track	1000010149
1.51925	nm/s	Track	1000000536					2.78639	nm/s	Track	1000010238
1.62207	nm/s	Track	1000000537					1.91868	nm/s	Average
2.43182	nm/s	Track	1000000538					0.525801	nm/s	STDW
2.15633	nm/s	Track	1000000540
2.1979	nm/s	Track	1000000541
1.92859	nm/s	Track	1000000542
2.42721	nm/s	Track	1000000543
1.04884	nm/s	Track	1000000544
2.40124	nm/s	Track	1000000546
4.19975	nm/s	Track	1000000547
2.31986	nm/s	Track	1000000548
1.58552	nm/s	Track	1000000549
2.15321	nm/s	Track	1000000552
2.57403	nm/s	Track	1000000553
2.86759	nm/s	Track	1000000556
1.00735	nm/s	Track	1000000558
1.87596	nm/s	Track	1000000560
2.24663	nm/s	Track	1000000563
1.07567	nm/s	Track	1000000564
3.19467	nm/s	Track	1000000565
1.12246	nm/s	Track	1000000566
2.11278	nm/s	Track	1000000567
2.1803	nm/s	Track	1000000568
2.32993	nm/s	Track	1000000570
3.28025	nm/s	Track	1000000571
1.13992	nm/s	Track	1000000574
1.99776	nm/s	Track	1000000575
1.30808	nm/s	Track	1000000576
2.036	nm/s	Track	1000000577
1.77529	nm/s	Track	1000000578
1.37867	nm/s	Track	1000000580
1.84401	nm/s	Track	1000000581
1.9635	nm/s	Track	1000000583
2.09356	nm/s	Track	1000000584
2.70579	nm/s	Track	1000000585
2.12305	nm/s	Track	1000000586
2.38152	nm/s	Track	1000000587
1.15253	nm/s	Track	1000000588
2.11179	nm/s	Track	1000000590
1.63789	nm/s	Track	1000000591
2.4214	nm/s	Track	1000000594
1.1008	nm/s	Track	1000000596
1.78197	nm/s	Track	1000000597
1.07964	nm/s	Track	1000000599
1.61014	nm/s	Track	1000000601
2.50012	nm/s	Track	1000000603
1.34767	nm/s	Track	1000000606
1.24846	nm/s	Track	1000000607
0.946417	nm/s	Track	1000000608
1.97054	nm/s	Track	1000000609
1.54955	nm/s	Track	1000000610
1.38246	nm/s	Track	1000000611
1.96815	nm/s	Track	1000000612
3.13728	nm/s	Track	1000000613
1.39111	nm/s	Track	1000000614
2.06438	nm/s	Track	1000000615
1.38346	nm/s	Track	1000000618
2.01561	nm/s	Track	1000000619
1.88671	nm/s	Track	1000000620
1.5582	nm/s	Track	1000000621
2.8564	nm/s	Track	1000000622
2.72408	nm/s	Track	1000000624
1.4047	nm/s	Track	1000000625
1.83049	nm/s	Track	1000000627
2.27913	nm/s	Track	1000000628
1.71044	nm/s	Track	1000000629
1.37146	nm/s	Track	1000000630
2.03954	nm/s	Track	1000000631
1.57143	nm/s	Track	1000000632
1.3175	nm/s	Track	1000000633
1.6578	nm/s	Track	1000000634
1.45238	nm/s	Track	1000000635
1.55536	nm/s	Track	1000000637
1.52724	nm/s	Track	1000000638
1.16816	nm/s	Track	1000000639
1.71625	nm/s	Track	1000000640
2.24278	nm/s	Track	1000000641
2.2576	nm/s	Track	1000000642
1.94834	nm/s	Track	1000000643
1.78222	nm/s	Track	1000000644
1.04447	nm/s	Track	1000000645
1.87952	nm/s	Track	1000000646
3.3259	nm/s	Track	1000000647
2.65568	nm/s	Track	1000000648
1.62853	nm/s	Track	1000000650
2.15219	nm/s	Track	1000000651
1.43289	nm/s	Track	1000000652
2.88843	nm/s	Track	1000000653
2.11831	nm/s	Track	1000000654
2.31123	nm/s	Track	1000000655
1.52899	nm/s	Track	1000000656
2.07738	nm/s	Track	1000000657
1.40403	nm/s	Track	1000000658
1.60933	nm/s	Track	1000000659
1.49137	nm/s	Track	1000000661
1.59452	nm/s	Track	1000000662
1.79079	nm/s	Track	1000000663
2.28729	nm/s	Track	1000000664
1.40242	nm/s	Track	1000000665
2.38293	nm/s	Track	1000000666
1.79069	nm/s	Track	1000000667
2.28801	nm/s	Track	1000000668
1.23925	nm/s	Track	1000000669
4.62299	nm/s	Track	1000000670
2.51986	nm/s	Track	1000000671
3.32179	nm/s	Track	1000000672
2.14257	nm/s	Track	1000000674
2.42849	nm/s	Track	1000000684
2.44692	nm/s	Track	1000000777
2.58603	nm/s	Track	1000000778
2.54424	nm/s	Track	1000000802
1.82462	nm/s	Track	1000000803
3.22246	nm/s	Track	1000000820
2.48627	nm/s	Track	1000000837
1.38143	nm/s	Track	1000000847
3.00772	nm/s	Track	1000000887
1.53732	nm/s	Track	1000000910
1.73692	nm/s	Track	1000000916
2.75866	nm/s	Track	1000000934
1.03955	nm/s	Track	1000000946
4.20241	nm/s	Track	1000001009
3.05704	nm/s	Track	1000001088
3.26909	nm/s	Track	1000001228
2.15545	nm/s	Track	1000001268
1.4851	nm/s	Track	1000001274
1.31459	nm/s	Track	1000001305
3.1768	nm/s	Track	1000001372
1.02198	nm/s	Track	1000001375
1.29693	nm/s	Track	1000001378
2.49279	nm/s	Track	1000001394
1.80582	nm/s	Track	1000001407
1.85808	nm/s	Track	1000001418
0.745617	nm/s	Track	1000001420
1.23757	nm/s	Track	1000001421
1.80992	nm/s	Track	1000001425
1.05695	nm/s	Track	1000001428
0.76627	nm/s	Track	1000001434
3.29126	nm/s	Track	1000001493
3.87413	nm/s	Track	1000001607
2.7054	nm/s	Track	1000001780
3.49155	nm/s	Track	1000002001
1.1616	nm/s	Track	1000002011
2.33583	nm/s	Track	1000002618
2.1257	nm/s	Track	1000002622
2.84243	nm/s	Track	1000002923
1.49593	nm/s	Track	1000003083
2.97064	nm/s	Track	1000003124
4.46827	nm/s	Track	1000003139
2.79379	nm/s	Track	1000003147
5.43408	nm/s	Track	1000006838
3.12396	nm/s	Track	1000006839
3.80461	nm/s	Track	1000006842
2.60121	nm/s	Track	1000006843
3.67106	nm/s	Track	1000006844
3.4961	nm/s	Track	1000006845
3.41818	nm/s	Track	1000006846
2.57059	nm/s	Track	1000006848
1.86093	nm/s	Track	1000006854
1.95264	nm/s	Average
0.701977	nm/s	STAW

## Sheet: Figure 4E
	Mean track speed of measured cells relative to their z position
Control			acUVB PI 1day			acUVB PI 4day
mean speed (um/s)	relative z position to epidermis (um)		mean speed (um/s)	relative z position to epidermis (um)		mean speed (um/s)	relative z position to epidermis (um)
2.85	-56.55		3.23	-55.22		1.79	-60.05
1.63	-50.34		1.93	-40.15		1.81	-58.49
2.56	-114.77		2.6	-31.31		1.37	-50.13
2.6	-104.4		2.75	-19.43		1.87	-54.46
1.56	-90.67		3.31	-19.59		1.46	-53.59
4.02	-86.86		2.45	-14.6		1.39	-47.95
2.76	-87.02		1.82	-59.52		1.47	-44.62
1.24	-81.26		2.12	-45.01		1.47	-46.11
1.99	-69.83		2.11	-47.35		1.58	-33.83
1.69	-69.68		1.92	-45.79		2.27	-76.73
1.38	-69.16		2.02	-39.42		2.9	-77.83
1.9	-64.87		1.67	-40.91		1.64	-69.2
2.06	-65.65		1.66	-30.35		2.16	-67.43
1.91	-59.89		3	-24.24		2.36	-63.83
2.36	-61.85		2.13	-25.92		1.39	-62.82
1.33	-56.25		2.15	-24.48		3.4	-57.28
2.59	-49.61		2.11	-26.33		1.63	-57.33
2.37	-48.59		2.73	-19.08		1.91	-54.14
1.3	-49.95		2.05	-19.84		1.75	-53.57
1.95	-89.1		2.72	-21.33		1.4	-49.07
2.07	-83.44		4.14	-49.57		1.75	-54.19
2.04	-78.03		3.15	-46.39		1.14	-27.5
2.05	-80.04		2.6	-42.61		1.5	-44.49
1.66	-74.95		2.95	-34.46		1.33	-58.76
1.47	-70.83		1.56	-35.26		1.57	-55.47
2.46	-65.1		2.61	-31.89		1.9	-53.95
2.36	-64.27		1.81	-29.13		2.2	-53.42
1.63	-59.46		2.03	-24.51		4.51	-47.51
1.84	-58.17		2.59	-23.81		2.95	-49.48
2.03	-53.07		1.93	-24.83		2.01	-49.4
2.27	-54.79		3.13	-22.76		1.38	-48.01
1.75	-55.03		1.99	-15.69		1.27	-42.76
1.25	-51.25		1.77	-72.6		1.62	-37.34
2.83	-51.67		1.51	-54.62		1.97	-28.01
1.6	-64.88		1.86	-48.78		2.44	-62.3
1.63	-65.17		1.36	-44.44		2.17	-59.35
1.68	-66.08		3.79	-38.95		2.38	-59.78
2.95	-59.57		1.88	-40.59		3.12	-58.82
1.72	-55.75		3.14	-41.1		1.57	-43.76
1.59	-48.36		2.21	-30.89		1.37	-43.97
1.39	-50.94		2.01	-20.53		1.28	-43.42
2.18	-67.04		1.67	-21.77		3.94	-43.34
1.77	-64.84		1.93	-21.78		1.35	-38.56
1.27	-49.7		2.75	-21.85		1.41	-34.09
1.49	-80.43		1.76	-46.12		1.47	-27.74
1.2	-64.44		2.28	-38.87		1.68	-30.75
1.87	-67.59		3.36	-35.74		1.39	-20.93
2.59	-65		2.24	-30.2		3.44	-49.84
1.64	-65.29		2.44	-30.05		1.18	-48.49
1.4	-59.73		4.07	-25.48		1.33	-45.83
1.78	-54.61		4.4	-20.92		1.53	-45.67
1.73	-48.19		2.15	-20.19		1.7	-40.42
1.19	-50.78		2.24	-44.01		1.08	-40.92
1.37	-49.15		2.58	-37.15		0.85	-33.45
2.27	-74.52		2.32	-25.51		1.38	-30.31
1.65	-64.93		1.56	-41.33		1.33	-27.76
2.18	-54.07		1.93	-35.57		1.53	-29.73
2.26	-51.11		2.11	-24.12		1.48	-44.46
2.09	-50.94		2.79	-25.26		1.83	-42.83
1.41	-50.69		2.3	-21.23		1.37	-38.91
1.58	-64.77		2.32	-21.81		1.12	-32.03
2.91	-65.14		2.15	-79.21		1.59	-32.52
1.65	-62.09		2.22	-48.36		1.5	-32.05
1.52	-55.66		2.1	-51.42		0.97	-25.42
2.08	-55.44		1.53	-51.32		1.12	-57.04
1.68	-49.84		2.67	-45.45		1.88	-54.63
1.1	-50.85		1.81	-30.35		1.98	-48.07
1.19	-49.99		2.17	-34.62		1.34	-49.01
2.46	-51.92		2.09	-20.44		2.74	-45.55
1.93	-70.31		1.89	-13.51		1.02	-37.54
1.48	-71.21		2.35	-54.8		1.42	-32.99
2.51	-70.37		2.08	-54.35		1.63	-34.76
1.76	-60.12		2.16	-51.87		1.42	-26.54
2.01	-61.53		1.81	-46.21		1.42	-30.05
2.06	-54.83		2.66	-43.72		1.76	-28.57
1.85	-57.47		2.65	-45.83		1.2	-22.23
1.36	-56.34		1.93	-39.93		1.06	-9.07
1.46	-55.51		2.31	-33.87		2.53	-42.32
0.99	-51.66		2.97	-35.16		1.27	-35.25
2.21	-49.75		1.68	-30.52		1.7	-28.82
1.76	-49.15		1.79	-25.96		1.39	-30.08
2.94	-66.86		2.19	-15.8		1.16	-27.37
2.33	-63.2		6.97	-14.76		1.12	-25.16
1.69	-55.45		2.7	-14.04		1.95	-42.95
1.83	-55.02		2.83	-58.89		4.31	-33.64
1.42	-55.36		2.22	-59.59		1.6	-32.64
1.51	-53.68		2.24	-48.14		1.69	-33.39
1.33	-53.82		2.01	-42.33		1.32	-28.11
2.22	-49.46		1.72	-40.78		1.52	-30.2
1.61	-50.86		1.83	-40.85		1.17	-17.17
2.93	-59.26		2.38	-36.46		2.46	-50.08
1.82	-51.05		2.12	-25.11		2.86	-39.68
1.72	-50.97		2	-18.99		0.98	-30.08
2.15	-48.38		2.03	-18.51		1.24	-28.81
3.27	-59.91		1.73	-25.9		0.83	-25.49
2.49	-58.75		2.62	-24.17		1.38	-39.19
1.56	-49.14		2.65	-43.52		1.4	-23.03
1.39	-51.12		2.51	-43.41		1.36	-25.12
1.55	-54.86		2.08	-44.93		1.12	-14.84
1.46	-56.24		2.59	-39.44		0.97	-24.8
1.88	-50.65		1.98	-35.92		1.6	-22.91
2.79	-48.71		1.92	-59.38		0.95	-19.83
1.49	-70.85		1.76	-51.33		1.03	-18.63
2.49	-69.26		2.22	-35.52		1.34	-14.67
2.38	-69.03		2.64	-23.14		1.69	-24.03
2.15	-60.37		1.95	-21.18		2.64	-26.86
2.07	-54.91		2.1	-19.41		0.87	0
1.91	-55.75		2.75	-15.56		1.86	-36.65
1.96	-49.23		2.14	-45.15		3.35	-44.53
1.51	-53.64		1.78	-30.84		4.5	-29.71
1.26	-50.18		1.91	-25.09		1.38	-4.88
2.32	-39.7		2.2	-25.9		2.07	-44.56
2.39	-40.99		2.61	-24.32		2.66	-46.89
1.19	-40.08		2.35	-22.95		3.75	-42.26
1.4	-34.87		2.48	-19.27		1.96	-39.6
1.34	-35.1		1.99	-11.2		3.81	-14.92
1.48	-36.35		2.38	-11.91		1.98	-53.85
1.9	-28.62		2.08	-12.22		3.22	-65.61
2.97	-29.46		1.58	-10.98		1.98	-9.07
2.37	-46.65		2.33	-12.6		3.11	-53.79
1.24	-44.98		1.98	-11.61		3.68	-32.82
1.63	-46.7		3.26	-10.75		4.91	-37.93
2.1	-43.89		1.9	-6.32		3.81	-72.81
2.14	-39.95		1.81	-9.89		4.77	-58.67
1.65	-38.29		1.89	-12.65		4.1	-66.84
1	-39.67		2.09	0		4.36	-67.34
1.98	-40.52		3.16	-62.25		2.82	-58.56
2.02	-33.35		2.87	-62.28		3.41	-73.97
2.07	-35.86		2.43	-40.92		2.2	-80.96
2	-32.48		2.23	-29.59		3.65	-78.9
1.62	-32.48		1.69	-22.23		3.23	-24.8
1.74	-45.82		2.71	-29.95		3.06	-28.28
2.66	-43.56		1.91	-50.25		4.09	-40.46
1.4	-46.47		2.11	-41.41		3.74	-55.14
1.56	-40.87		2.96	-10.78		3.73	-62.81
2.3	-38.62		1.82	-56.2		2.1	-48.71
1.79	-41.1		1.33	-47.31		3.43	-68.04
1.96	-36.59		2.37	-26.37		2.08	-65.29
1.92	-36.42		1.86	-45.32		7.75	-86.06
1.5	-32.54		2.18	-11.71		4.75	-58.28
1.43	-31.38		2.62	-41.26		3.68	-75.3
1.86	-43.67		3.02	-34.33		3.74	-59.22
1.67	-38.62		2.38	-42.69		3.9	-75.67
1.52	-32.16		2.37	-46.28		3.31	-48.53
2.19	-22.24		3.18	-35.81		6.07	-58.13
3.87	-46.81		3.06	-21.71		2.15	-45.37
1.25	-45.45		3.17	-30.05		4.29	-58.78
1.35	-38.46		2.39	-33.59		3.25	-43.78
1.89	-37.27		3.31	-25.67		2.76	-44.57
1.32	-36.16		2.28	-40.73		4.38	-20.51
1.66	-29.07		1.68	-53.86		2.72	-48.73
2.42	-28.46		2.35	-54.72		4.24	-37.71
1.88	-25.63		4.15	-28.48		4.02	-64.78
1.83	-24.55					4.74	-78.42
1.93	-21.65					3.79	-49.05
2.21	-21.46					4	-49.92
2.67	-17.31					2.82	-50.4
1.37	-45.08					2.85	-70.1
2.62	-44.29					2.62	-47.62
1.85	-46.67					2.94	-61.32
1.42	-45.25					2.98	-46.8
1.69	-38.25					5.67	-92.06
1.91	-42.1					2.35	-64.01
1.08	-41.1					2.16	-79.34
1.52	-39.48					3.89	-63.54
0.94	-40.42					3.19	-50.77
1.79	-39.23					2.7	-46.62
1.21	-35.38					4.11	-45.7
1.7	-35.14					1.1	-58.99
1.63	-34.22					2.43	-70.67
1.73	-35.04					5.71	-83.18
1.79	-31.57					4.85	-52.07
1.46	-28.8					3.17	-62.9
2.68	-29.8					2.64	-61.93
1.96	-31.27					2.79	-63.78
1.43	-29.79
1.54	-23.12
2	-23.46
1.68	-23.6
2.2	-23.36
1.55	-24.53
2.37	-46.43
1.88	-42.21
1.53	-41.33
1.52	-41.96
1.84	-34.38
1.62	-35.35
1.65	-33.51
2.54	-30.88
1.38	-30.7
1.93	-29.63
2.24	-29.86
1.54	-25.79
2.06	-25.57
2.26	-24.06
1.61	-21.27
1.84	-19.75
2.01	-22.21
1.86	-19.24
1.8	-18.61
2.07	-16.76
2.47	-44.15
2.24	-44.72
1.75	-44
1.88	-39.74
1.22	-40.52
1.18	-40.76
1.86	-40.21
2.74	-38.9
2.15	-34.48
1.79	-34.06
2.05	-28.42
2.23	-29.12
2.14	-28.19
1.69	-30.7
1.77	-26.15
2.23	-24.15
2.31	-26.69
2.31	-23.63
2.44	-17.5
1.31	-46.52
1.59	-45.24
1.18	-46.16
1.91	-45.6
1.33	-42.14
1.9	-38.83
1.73	-31.72
1.44	-29.88
1.77	-26.15
2.46	-26.46
2.29	-24.89
1.88	-21.87
1.55	-16.45
1.74	-15.82
2.07	-17.54
1.29	-15.08
1.73	-46.45
1.49	-46.02
1.97	-43.81
2	-43.18
1.69	-47.36
1.3	-40.21
1.29	-39.85
1.55	-41.13
1.44	-40.29
1.43	-35.18
1.83	-36.34
2.02	-35.39
1.47	-35.69
1.82	-37.61
2.28	-33.55
2.23	-35.16
1.43	-30.12
3.02	-29.66
1.27	-25.19
1.54	-25.59
1.4	-25.38
3.07	-25.65
2.07	-26.1
1.97	-21.2
1.95	-19.53
1.18	-22.19
1.57	-21.51
1.27	-17.21
1.71	-17.19
2.08	-12.51
1.46	-45.62
1.66	-45.21
1.62	-44.44
1.57	-43.73
1.8	-45.34
1.72	-39.97
1.99	-39.96
1.55	-39.42
1.76	-40.18
2.12	-35.29
2.03	-33.82
1.84	-35.43
1.39	-35.28
1.81	-31.59
1.52	-30.29
1.96	-29.38
1.46	-29.41
1.56	-31.73
2.27	-24.74
2.15	-24.51
2.25	-26.24
1.67	-24.88
1.71	-25.83
1.86	-19.69
1.77	-17.9
1.88	-18.45
2.43	-18.46
2.72	-14.43
2.09	-13.56
1.49	-12.42
1.75	-11.08
1.81	-10.17
1.88	-44.84
1.87	-45.42
1.82	-47.26
2.43	-38.41
1.45	-40.24
2.35	-38.92
1.79	-40.77
1.45	-35.2
1.84	-29.69
1.67	-28.24
2.33	-24.73
2	-26.61
2.04	-23.48
2.31	-18.33
2.65	-16.54
1.72	-14.27
1.54	-44.43
1.54	-39.75
1.67	-40.66
1.34	-41.49
1.4	-35.74
1.74	-34.6
2.13	-31.12
1.69	-31.19
2.61	-28.66
2.05	-25.8
1.8	-24.83
2.04	-26.26
1.92	-22.27
1.65	-19.7
2.14	-13.9
1.63	-13.82
1.27	-15.12
1.11	-16.2
2.15	-9.63
1.82	-11.33
1.64	-5.64
1.8	-5.84
1.41	0
1.49	-45.68
1.51	-46.48
1.43	-40.76
2.87	-40.41
1.67	-42.48
2.07	-40.16
1.75	-34.89
2.12	-29.96
1.84	-29.36
1.71	-30.13
1.74	-25.38
2.11	-24.01
3.15	-25.94
1.41	-20.47
1.74	-14.84
1.89	-14.39
1.65	-13.06
2.22	-15.97
1.78	-11.85
1.6	-8.56
1.1	-45.78
1.65	-47.6
1.98	-39.06
1.93	-38.4
1.19	-39.71
1.71	-34.34
1.71	-34.97
1.23	-35.08
2.02	-30.2
1.78	-29.75
1.89	-23.03
2.02	-27.49
1.68	-27.18
2.69	-24.76
1.8	-22.27
1.87	-21.9
1.86	-16.42
2.02	-15.82
1.3	-17.22
1.81	-17.14
1.68	-12.61
1.66	-39.29
1.48	-34.68
1.57	-36.82
2.59	-29.68
1.76	-30.11
1.66	-31.79
2.09	-24.83
1.6	-26.13
1.26	-21.74
2.43	-20.51
2.3	-16.7
1.76	-16.3
2.53	-11.54
2.27	-12.18
1.87	-39.44
2.09	-27.24
2.28	-19.44
2.85	-10.45
2.58	-52.11
1.11	-64.97
1.8	-52.24
1.37	-65.64
1.16	-48.49
1.52	-60.32
1.91	-55.37
1.52	-48.57
2.13	-30.86
2.07	-23.05
2.99	-25.58
2.02	-36.05
2.66	-31.07
2.76	-24.71
2.69	-31.41
3.27	-23.77
1.79	-29.75
1.48	-25.98
2.35	-20.2
1.61	-14.73
3.65	-70.31
3.58	-60.44
2.44	-74.03
2.12	-49.55
2.84	-34.56
2.27	-22.74
1.85	-15.94
2.59	-52.7
1.57	-63.73
1.44	-58.55
2.22	-75.69
3.04	-79.5
2.92	-102.73
2.4	-103.1
4.25	-86.49
2.16	-110.59
4.11	-105.02
2.64	-105.9
2.23	-90.29
4.19	-84.31
3.35	-73.98
3.67	-118.65
1.91	-71.49
2.79	-81.45
