# Supplementary material for: Role of distinct fibroblast lineages and immune cells in dermal repair following UV radiation-induced tissue damage
Source: eLife journal article supplement (doi:10.7554/elife.71052), 2021-12-23
Supplement: supp [file elife-71052-supp-v1.zip › elife_poa_e71052_Figure_5_figure_supplement_1_source_data_1.xlsx]

## Sheet: Figure S5B
	Summary of YAP+ Fbs (%) after chUVB
		Upper dermis									Lower dermis
	Control	10.2041	11.1111	11.0092	10.1911	6.71642					19.0476	34.1936	28.5714	22.3054	25.5814
	chUVB	31.9444	22.3529	10.1124	20						48.9691	32.902	32.4433	23.1103
PDGFR H2B cells		SD: 3, 100, filter 20
DAPI		SD: 3, 200, filter 20
YAP		SD:3, 100, filter 20
chUVB PI1day
Sample		area	PDGFR+	YAP+	YAP+ PDGFR+	DAPI	PDGFRper area in mm2	YAP positive Fb%	DAPI per area in mm2
chUVB PI1d 1 GFP YAP Itga6 20x1	upper	76005	41	30	8	199	539.438	19.5122	2618.25
	lower	189772	223	164	103	690	1175.09	46.1883	3635.94
chUVB PI1d 1 GFP YAP Itga6 20x2	upper	51922	31	35	15	161	597.049	48.3871	3100.81
	lower	159410	165	140	87	633	1035.07	52.7273	3970.89
Sum	upper	127927	72	65	23	360	562.821	31.9444	2814.1
	lower	349182	388	304	190	1323	1111.17	48.9691	3788.86
chUVB PI1d 2 GFP YAP Itga6 20x1	upper	2075	38	19	8	127	18313.3	21.0526	61204.8
	lower	242531	260	115	61	730	1072.03	23.4615	3009.92
chUVB PI1d 2 GFP YAP Itga6 20x2	upper	94403	47	30	11	248	497.866	23.4043	2627.04
	lower	227769	281	179	117	793	1233.71	41.637	3481.6
Sum	upper	96478	85	49	19	375	881.03	22.3529	3886.9
	lower	470300	541	294	178	1523	1150.33	32.902	3238.36
chUVB PI1d 3 GFP YAP Itga6 20x1	upper	58010	59	24	5	183	1017.07	8.47458	3154.63
	lower	233796	343	239	101	954	1467.09	29.4461	4080.48
chUVB PI1d 3 GFP YAP Itga6 20x2	upper	62541	30	19	4	143	479.685	13.3333	2286.5
	lower	323664	406	325	142	1149	1254.39	34.9754	3549.98
Sum	upper	120551	89	43	9	326	738.277	10.1124	2704.25
	lower	557460	749	564	243	2103	1343.59	32.4433	3772.47
chUVB PI1day control
Sample		area	PDGFR+	YAP+	YAP+ PDGFR+	DAPI	PDGFRper area in mm2	YAP positive Fb%	DAPI per area in mm2
chUVB control 1 GFP YAP Itga6 20x1	upper	57720	79	43	7	216	1368.68	8.86076	3742.2
	lower	124349	210	130	42	589	1688.8	20	4736.67
chUVB control 1 GFP YAP Itga6 20x2	upper	41429	68	33	8	131	1641.36	11.7647	3162.04
	lower	96437	189	124	34	453	1959.83	17.9894	4697.37
Sum	upper	99149	147	76	15	347	1482.62	10.2041	3499.78
	lower	220786	399	254	76	1042	1807.18	19.0476	4719.5
chUVB control 2 GFP YAP Itga6 20x1	upper	34469	54	30	6	108	1566.63	11.1111	3133.25
	lower	80713	155	121	53	391	1920.38	34.1935	4844.32
chUVB control 2 GFP YAP Itga6 20x2	upper						#DIV/0!	#DIV/0!	#DIV/0!
	lower						#DIV/0!	#DIV/0!	#DIV/0!
Sum	upper	34469	54	30	6	108	1566.63	11.1111	3133.25
	lower	80713	155	121	53	391	1920.38	34.1935	4844.32
chUVB control 3 GFP YAP Itga6 20x1	upper	25533	53	29	6	116	2075.75	11.3208	4543.14
	lower	68456	147	134	44	377	2147.36	29.932	5507.19
chUVB control 3 GFP YAP Itga6 20x2	upper	32946	56	36	6	154	1699.75	10.7143	4674.32
	lower	66813	147	111	40	394	2200.17	27.2109	5897.06
Sum	upper	58479	109	65	12	270	1863.92	11.0092	4617.04
	lower	135269	294	245	84	771	2173.45	28.5714	5699.75
acUVB like control
Sample		area	PDGFR+	YAP+	YAP+ PDGFR+	DAPI	PDGFRper area in mm2	YAP positive Fb%	DAPI per area in mm2
acUV 1 GFP YAP Itga6 20x1	upper	82933	91	69	9	213	1097.27	9.89011	2568.34
	lower	451130	375	261	70	761	831.246	18.6667	1686.88
acUV 1 GFP YAP Itga6 20x2	upper	55109	66	71	7	152	1197.63	10.6061	2758.17
	lower	348479	293	2557	79	585	840.797	26.9625	1678.72
Sum	upper	138042	157	140	16	365	1137.34	10.1911	2644.12
	lower	799609	668	2818	149	1346	835.408	22.3054	1683.32
acUV 2 GFP YAP Itga6 20x1	upper	79760	67	18	3	189	840.02	4.47761	2369.61
	lower	220669	190	152	73	575	861.018	38.4211	2605.71
acUV 2 GFP YAP Itga6 20x2	upper	62937	67	50	6	170	1064.56	8.95522	2701.11
	lower	251295	283	220	48	752	1126.17	16.9611	2992.5
Sum	upper	142697	134	68	9	359	939.053	6.71642	2515.82
	lower	471964	473	372	121	1327	1002.2	25.5814	2811.66
