# Supplementary material for: Role of distinct fibroblast lineages and immune cells in dermal repair following UV radiation-induced tissue damage
Source: eLife journal article supplement (doi:10.7554/elife.71052), 2021-12-23
Supplement: supp [file elife-71052-supp-v1.zip › elife_poa_e71052_Figure_5_source_data_1.xlsx]

## Sheet: Figure 5A
		Summary of TOPGFP positive dermal cells (%) after acUVB
	Upper dermis						Lower dermis
Control	18.3448	23.6882	25.4065	24.5122	21.4755		13.278	20.8122	23.3677	18.1764	16.1116
1day	38.675	31.6107	42.4594	37.8231	43.0041	40.5242	35.9244	34.5016	46.9508	51.9337	45.6622	41.8251
4 days	40.4762	30.3145	36.5663	41.4501			29.6276	33.1591	41.5129	30.3942
11 days	31.5734	20.3649	37.084	26.694			18.2196	13.9865	15.0827	20.1284
14 days	15.4815	15.9016	21.5935	14.9944			15.872	7.71679	21.1939	8.91341
21 days	15.2123	12.6072	6.76626	27.7311			11.6183	12.0375	3.07355	16.6667
Control Non-IR samples
sample		Nuclei	GFP	GFP/Nuclei in %
control 1L1R female-20x-1	papillary	725	133	18.3448	18.3448
	reticular	1205	160	13.278	13.278
control 1R female-20x-1	papillary	667	158	23.6882	23.6882
	reticular	1576	328	20.8122	20.8122
control 1R male-20x-1	papillary	492	125	25.4065	25.4065
	reticular	1164	272	23.3677	23.3677
control1-20x-1	papillary	820	201	24.5122	24.5122
	reticular	1678	305	18.1764	18.1764
control2-20x-1	papillary	513	113	22.0273	22.0273
	reticular	971	165	16.9928	16.9928
acUVB PI 1day
		S3= 100, size 20	S3= 180, size 20
	TOPGFP UV 4d 2IR	GFP	DAPI	GFP+ cells (%)
TOP 1.1a IR 20x1	papillary	103	268	0.384328
	reticular	226	649	0.348228
TOP 1.1a IR 20x2	papillary	83	215	0.386047
	reticular	221	583	0.379074
TOP 1.1b IR 20x1	papillary	95	264	0.359848
	reticular	257	757	0.339498
TOP 1.1b IR 20x2	papillary	151	370	0.408108
	reticular	322	867	0.371396
sum	papillary	432	1117	0.38675
	reticular	1026	2856	0.359244
	TOPGFP UV 4d 2IR	GFP	DAPI	GFP+ cells (%)
TOP 1.2a IR 20x1	papillary	84	229	0.366812
	reticular	377	1011	0.372898
TOP 1.2a IR 20x2	papillary	85	312	0.272436
	reticular	345	1105	0.312217
TOP 1.2a IR 20x3	papillary	83	245	0.338776
	reticular	301	1012	0.297431
TOP 1.2b IR 20x1	papillary	132	397	0.332494
	reticular	393	1117	0.351835
TOP 1.2b IR 20x2	papillary	87	307	0.283388
	reticular	415	1062	0.390772
sum	papillary	471	1490	0.316107
	reticular	1831	5307	0.345016
	TOPGFP UV 4d 2IR	GFP	DAPI	GFP+ cells (%)
TOP 2.1a IR 20x1	papillary	80	253	0.316206
	reticular	394	907	0.434399
TOP 2.1b IR 20x1	papillary	103	178	0.578652
	reticular	245	454	0.539648
sum	papillary	183	431	0.424594
	reticular	639	1361	0.469508
	TOPGFP UV 4d 2IR	GFP	DAPI	GFP+ cells (%)
TOP 2.2a IR 20x1	papillary	92	271	0.339483
	reticular	292	610	0.478689
TOP 2.2a IR 20x2	papillary	66	168	0.392857
	reticular	336	650	0.516923
TOP 2.2b IR 20x1	papillary	120	296	0.405405
	reticular	500	912	0.548246
sum	papillary	278	735	0.378231
	reticular	1128	2172	0.519337
	TOPGFP UV 4d 2IR	GFP	DAPI	GFP+ cells (%)
TOP 3.1a IR 20x1	papillary	86	231	0.372294
	reticular	589	1350	0.436296
TOP 3.1a IR 20x2	papillary	72	184	0.391304
	reticular	308	765	0.402614
TOP 3.1b IR 20x1	papillary	84	193	0.435233
	reticular	433	919	0.471164
TOP 3.1b IR 20x2	papillary	176	364	0.483516
	reticular	649	1300	0.499231
sum	papillary	418	972	0.430041
	reticular	1979	4334	0.456622
	TOPGFP UV 4d 2IR	GFP	DAPI	GFP+ cells (%)
TOP 3.2a IR 20x1	papillary	108	315	0.342857
	reticular	390	1097	0.355515
TOP 3.2a IR 20x2	papillary	69	199	0.346734
	reticular	393	1172	0.335324
TOP 3.2b IR 20x1	papillary	146	237	0.616034
	reticular	613	1047	0.585482
TOP 3.2b IR 20x2	papillary	166	400	0.415
	reticular	668	1499	0.44563
TOP 3.2b IR 20x3	papillary	114	337	0.338279
	reticular	466	1234	0.377634
sum	papillary	603	1488	0.405242
	reticular	2530	6049	0.418251
acUVB PI 4 days
		S3= 100, size 20	S3= 180, size 20
	TOPGFP UV 4d 2IR	GFP	DAPI	GFP+ cells (%)				TOPGFP UV 4d 2IR	GFP	DAPI	GFP+ cells (%)
2IR BSO 20x1	papillary	85	233	0.364807			IR BSO 20x1	papillary	78	231	0.337662
	reticular	191	673	0.283804				reticular	319	726	0.439394
2IR BSO 20x2	papillary	85	227	0.374449			IR BSO 20x2	papillary	62	195	0.317949
	reticular	132	474	0.278481				reticular	231	570	0.405263
2IR BSO 20x3	papillary	67	130	0.515385			IR BSO 20x3	papillary	113	247	0.45749
	reticular	82	263	0.311787				reticular	205	452	0.45354
2IR BSO 20x4	papillary	86	208	0.413462			IR BSO 20x4	papillary	75	224	0.334821
	reticular	128	389	0.329049				reticular	145	420	0.345238
sum	papillary	323	798	40.4762			sum	papillary	328	897	36.5663
	reticular	533	1799	29.6276				reticular	900	2168	41.5129
				GFP+ cells (%)				TOPGFP UV 4d 2IR	GFP	DAPI	GFP+ cells (%)
2IR BSU 20x1	papillary	83	255	0.32549			IR BSU 20x1	papillary	92	204	0.45098
	reticular	258	689	0.374456				reticular	94	375	0.250667
2IR BSU 20x2	papillary	65	193	0.336788			IR BSU 20x2	papillary	80	187	0.427807
	reticular	178	452	0.393805				reticular	169	552	0.306159
2IR BSU 20x3	papillary	48	187	0.256684			IR BSU 20x3	papillary	74	178	0.41573
	reticular	135	492	0.27439				reticular	219	626	0.34984
2IR BSU 20x4	papillary	45	160	0.28125			IR BSU 20x4	papillary	57	162	0.351852
	reticular	127	472	0.269068				reticular	104	375	0.277333
sum	papillary	241	795	30.3145			sum	papillary	303	731	41.4501
	reticular	698	2105	33.1591				reticular	586	1928	30.3942
P11d TOP-GFP
sample		Nuclei	GFP	GFP+ cells (%)	average of replicates
BSO 1L female BSO 20x-1	papillary	252	97	38.4921	31.5734
	reticular	261	43	16.4751	18.2196
BSO 1L female BSO 20x-2	papillary	507	125	24.6548
	reticular	556	111	19.964
BSO 1L female BSU 20x-1	papillary	634	133	20.9779	20.3649
	reticular	1527	203	13.294	13.9865
BSO 1L female BSU 20x-2	papillary	967	191	19.7518
	reticular	1417	208	14.6789
BSO 2L male BSO 20x-1	papillary	631	234	37.084
	reticular	2599	392	15.0827
BSO 2L male BSU 20x-1	papillary	974	260	26.694
	reticular	1714	345	20.1284
P14d TOP-GFP
sample		Nuclei	GFP	GFP+ cells (%)	average of replicates
14.3 f BSO 20x-1	papillary	660	134	20.303	15.4815
	reticular	756	147	19.4444	15.872
14.3 f BSO 20x-2	papillary	197	21	10.6599
	reticular	374	46	12.2995
14.3 f BSU 20x-1	papillary	610	97	15.9016
	reticular	1257	97	7.71679
14.3 g BSO 20x-1	papillary	866	187	21.5935
	reticular	1826	387	21.1939
14.3 g BSU 20x-1	papillary	887	133	14.9944
	reticular	1178	105	8.91341
P21d TOP-GFP
sample		Nuclei	GFP		average of replicates
2L1R BSO 20x-1	papillary	431	37	8.58469	15.2123
	reticular	764	15	1.96335	11.6183
2L1R- BSO 20x-2	papillary	347	79	22.7666
	reticular	822	154	18.7348
2L1R BSO 20x-3	papillary	140	20	14.2857
	reticular	332	47	14.1566
2L1R BSU 20x-1	papillary	623	121	19.4222	12.6072
	reticular	946	149	15.7505	12.0375
2L1R- BSU 20x-2	papillary	587	34	5.79216
	reticular	937	78	8.32444
2R BSO 20x-1	papillary	1138	77	6.76626
	reticular	2733	84	3.07355
2R BSU 20x-2	papillary	357	99	27.7311
	reticular	1086	181	16.6667

## Sheet: Figure 5B
		Summary of YAP+ Fbs (%) after acUVB
	Upper dermis									Lower dermis
Control	1.52091	1.63265	7.20721	0.4	0	5.30612				15.9751	9.70043	20.8219	28.6834	13.6771	18.3099
acUV	15.748	11.9266	8.97436	13.5593	16.129	11.9048	3.92157	7.14286		30.2826	19.2786	16.6467	11.0624	3.64372	19.9174	12.8074	6.60377
	PDGFR H2B cells		SD: 3, 100, filter30
	DAPI		SD: 2, 200, filter 30
	YAP		SD:3, 60, filter 30
	acUVB								Control
	Sample		PDGFR+	YAP+ PDGFR+	YAP positive Fb%				Sample		PDGFR+	YAP+ PDGFR+	YAP positive Fb%
	3A UV P1d YAP Itga6 20x1	upper	33	8	24.2424				3C Con YAP Itga6 20x1	upper	112	3	2.67857
		lower	244	81	33.1967					lower	195	38	19.4872
	3A UV P1d YAP Itga6 20x2	upper	31	7	22.5806				3C ConYAP Itga6 20x2	upper	151	1	0.662252
		lower	241	72	29.8755					lower	287	39	13.5889
	3A UV P1d YAP Itga6 20x3	upper	63	5	7.93651				Sum	upper	263	4	1.52091
		lower	258	72	27.907					lower	482	77	15.9751
	Sum	upper	127	20	15.748
		lower	743	225	30.2826
									Sample		PDGFR+	YAP+ PDGFR+	YAP positive Fb%
									4A Con YAP Itga6 20x1	upper	107	3	2.80374
	Sample		PDGFR+	YAP+ PDGFR+	YAP positive Fb%					lower	318	32	10.0629
	3B UV P1d YAP Itga6 20x1	upper	56	6	10.7143				4A Con YAP Itga6 20x2	upper	138	1	0.724638
		lower	417	73	17.506					lower	383	36	9.39948
	3B UV P1d YAP Itga6 20x2	upper	53	7	13.2075				Sum	upper	245	4	1.63265
		lower	387	82	21.1886					lower	701	68	9.70043
	Sum	upper	109	13	11.9266
		lower	804	155	19.2786
									Sample		PDGFR+	YAP+ PDGFR+	YAP positive Fb%
									4B Con YAP Itga6 20x1	upper	126	10	7.93651
	Sample		PDGFR+	YAP+ PDGFR+	YAP positive Fb%					lower	370	82	22.1622
	3D UV P1d YAP Itga6 20x1	upper	29	3	10.3448				4B Con YAP Itga6 20x2	upper	96	6	6.25
		lower	407	54	13.2678					lower	360	70	19.4444
	3D UV P1d YAP Itga6 20x2	upper	49	4	8.16327				Sum	upper	222	16	7.20721
		lower	428	85	19.8598					lower	730	152	20.8219
	Sum	upper	78	7	8.97436
		lower	835	139	16.6467
									Sample		PDGFR+	YAP+ PDGFR+	YAP positive Fb%
									4C Con YAP Itga6 20x1	upper	121	0	0
	Sample		PDGFR+	YAP+ PDGFR+	YAP positive Fb%					lower	313	98	31.3099
	4A UV P1d YAP Itga6 20x1	upper	41	4	9.7561				4C Con YAP Itga6 20x2	upper	129	1	0.775194
		lower	459	25	5.44662					lower	325	85	26.1538
	4A UV P1d YAP Itga6 20x2	upper	18	4	22.2222				Sum	upper	250	1	0.4
		lower	454	76	16.7401					lower	638	183	28.6834
	Sum	upper	59	8	13.5593
		lower	913	101	11.0624
									Sample		PDGFR+	YAP+ PDGFR+	YAP positive Fb%
									4D ConYAP Itga6 20x1	upper	134	0	0
	Sample		PDGFR+	YAP+ PDGFR+	YAP positive Fb%					lower	197	20	10.1523
	4B UV P1d YAP Itga6 20x1	upper	103	20	19.4175				4D Con YAP Itga6 20x2	upper	119	0	0
		lower	484	26	5.3719					lower	249	41	16.4659
	4B UV P1d YAP Itga6 20x2	upper	83	10	12.0482				Sum	upper	253	0	0
		lower	504	10	1.98413					lower	446	61	13.6771
	Sum	upper	186	30	16.129
		lower	988	36	3.64372
									Sample		PDGFR+	YAP+ PDGFR+	YAP positive Fb%
	Sample		PDGFR+	YAP+ PDGFR+	YAP positive Fb%				AcUV Con YAP Itga6 20x1	upper	142	7	4.92958
	4C UV P1d YAP Itga6 20x1	upper	20	3	15					lower	237	22	9.2827
		lower	227	70	30.837				AcUV Con YAP Itga6 20x2	upper	103	6	5.82524
	4C UV P1d YAP Itga6 20x2	upper	43	5	11.6279					lower	260	69	26.5385
		lower	329	50	15.1976				Sum	upper	245	13	5.30612
	4C UV P1d YAP Itga6 20x3	upper	21	2	9.52381					lower	497	91	18.3099
		lower	413	73	17.6755
	Sum	upper	84	10	11.9048
		lower	969	193	19.9174
	Sample		PDGFR+	YAP+ PDGFR+	YAP positive Fb%
	4D UV P1d YAP Itga6 20x1	upper	59	1	1.69492
		lower	438	63	14.3836
	4D UV P1d YAP Itga6 20x2	upper	43	3	6.97674
		lower	538	62	11.5242
	Sum	upper	102	4	3.92157
		lower	976	125	12.8074
	Sample		PDGFR+	YAP+ PDGFR+	YAP positive Fb%
	AcUV P1d 2 YAP Itga6 20x1	upper	114	12	10.5263
		lower	343	35	10.2041
	AcUV P1d 2 YAP Itga6 20x2	upper	103	6	5.82524
		lower	260	71	27.3077
	Sum	upper	217	18	8.29493
		lower	603	106	17.5788

## Sheet: Figure 5E&F
			Summary K14 b cat overexpression Fb desnity per area (Figure 5E)
		Upper dermis								Lower dermis
	Control	1607.61	1335.12	1378.58	1345.74					1714.83	1440.85	1433.26	1191.03
	Control bcat	1653.93	1351.87	1518.27						2014.15	2265.55	2257.72
	UVR	1013.48	1027.27	943.003	839.96					1596.81	1425.66	1118.54	1051.65
	UVR bcat	906.803	899.701	1052.58	978.28	1044.78	1138.58	1389.85	1437.58	2061.92	1286.73	1825.52	1946.64	2239.78	2421.56	2514.58	2105.91
			Summary K14 b cat overexpression Ki67+ Fbs (%) (Figure 5F)
		Upper dermis								Lower dermis
	Control	1.62602	1.96078	0	3.69128					3.25	2.89575	1.30506	4.07359
	Control bcat	1.28617	1.12782	3.76569						13.0988	6.9128	13.7838
	UVR	6.74157	0.701754	1.88679						1.92308	0.979519	0.507042
	UVR bcat	17.5	3.2	10.4972	13.764	5.03597	8.83721	15.6452	2.87253	29.9003	20.0288	10.756	6.59341	4.25972	23.5714	10.0809	7.15564
		PDGFR H2B cells		SD: 3, 100, filter 20
		DAPI		SD: 3, 200, filter 20
		Ki67		SD:3, 80, filter 50
	Control
		Sample		area	PDGFR+	Ki67+ PDGFR+	PDGFRper area in mm2	Ki67 positive Fb%
		Control GFP 1 PI1d BSO 20x1	upper	31521	52	2	1649.69	3.84615
			lower	105377	187	9	1774.58	4.81283
		Control GFP 1 PI1d BSU 20x2	upper	44990	71	0	1578.13	0
			lower	127883	213	4	1665.58	1.87793
		Sum	upper	76511	123	2	1607.61	1.62602
			lower	233260	400	13	1714.82	3.25
		Control GFP PI1d BSU 20x1	upper	70682	86	2	1216.72	2.32558
			lower	205900	293	7	1423.02	2.38908
		Control GFP PI1d BSU 20x2	upper	43914	67	1	1525.71	1.49254
			lower	153610	225	8	1464.75	3.55556
		Sum	upper	114596	153	3	1335.13	1.96078
			lower	359510	518	15	1440.85	2.89575
		Pi8d D PDGFGFP Ki67 Itga6 20x1	upper	102518	119	3	1160.77	2.52101
			lower	264740	316	16	1193.62	5.06329
		Pi8d D PDGFGFP Ki67 Itga6 20x2	upper	118921	179	8	1505.2	4.46927
			lower	374205	445	15	1189.19	3.37079
		Sum	upper	221439	298	11	1345.74	3.69128
			lower	638945	761	31	1191.03	4.07359
		GFP PI8d BSU 20x2	upper	72862	81	0	1111.69	0
			lower	244949	347	5	1416.62	1.44092
		GFP PI8d BSU 20x1	upper	57707	99	0	1715.56	0
			lower	182746	266	3	1455.57	1.12782
		Sum	upper	130569	180	0	1378.58	0
			lower	427695	613	8	1433.26	1.30506
	Control bcat
		Control b cat GFP1 PI8d BSU 20x1	upper	100249	155	3	1546.15	1.93548
			lower	302762	744	58	2457.38	7.7957
		Control b cat GFP1 PI8d BSU 20x2	upper	96516	111	0	1150.07	0
			lower	259133	529	30	2041.42	5.67108
		Sum	upper	196765	266	3	1351.87	1.12782
			lower	561895	1273	88	2265.55	6.9128
		Sample		area	PDGFR+	Ki67+ PDGFR+	PDGFRper area in mm2	Ki67 positive Fb%
		Control b cat GFP PI1d BSO 20x1	upper	81336	144	8	1770.43	5.55556
			lower	264417	476	69	1800.19	14.4958
		Control b cat GFP PI1d BSO 20x2	upper	63168	95	1	1503.93	1.05263
			lower	286684	634	84	2211.49	13.2492
		Sum	upper	144504	239	9	1653.93	3.76569
			lower	551101	1110	153	2014.15	13.7838
		Pi8d G PDGFGFP Ki67 Itga6 20x1	upper	122191	171	1	1399.45	0.584795
			lower	358770	726	90	2023.58	12.3967
		Pi8d G PDGFGFP Ki67 Itga6 20x2	upper	156032	224	3	1435.6	1.33929
			lower	458395	1084	156	2364.77	14.3911
		Pi8d G PDGFGFP Ki67 Itga6 20x3	upper	131453	227	4	1726.85	1.76211
			lower	366332	862	104	2353.06	12.065
		Sum	upper	409676	622	8	1518.27	1.28617
			lower	1183497	2672	350	2257.72	13.0988
		acUVB
		Sample		area	PDGFR+	Ki67+ PDGFR+	PDGFRper area in mm2	Ki67 positive Fb%
		Pi8d B PDGFGFP Ki67 Itga6 20x1	upper	148371	157	9	1058.16	5.73248						Sample		area	PDGFR+
			lower	542805	771	15	1420.4	1.94553						acUVB PI8d 1 IR BSO GFP Ki67 20x1	upper	114962	106	922.044
		Pi8d B PDGFGFP Ki67 Itga6 20x2	upper	115078	110	9	955.873	8.18182							lower	317216	356	1122.26
			lower	401579	737	14	1835.26	1.89959						acUVB PI8d 1 IR BSO GFP Ki67 20x1	upper	103489	100	966.286				P8d 1 IR BSO
		Sum	upper	263449	267	18	1013.48	6.74157							lower	384590	429	1115.47				area	DAPI	GFP	Ki67	GFP area mm2	%Ki67
			lower	944384	1508	29	1596.81	1.92308						Sum	upper	218451	206	943.003			upper	477552	1230	570	4	1193.59	0.701754
															lower	701806	785	1118.54			lower	2.23083e+06	4022	2246	22	1006.8	0.979519
		Pi8d C PDGFGFP Ki67 Itga6 20x1	upper	128618	116	1	901.896	0.862069						acUVB PI8d 1 IR BSO GFP Ki67 20x1	upper	145278	81	557.552
			lower	271560	385	6	1417.73	1.55844							lower	546801	603	1102.78
		Pi8d C PDGFGFP Ki67 Itga6 20x2	upper	142975	163	1	1140.06	0.613497						acUVB PI8d 2 IR BSO GFP Ki67 20x2	upper	58549	22	375.754
			lower	264333	379	3	1433.8	0.791557							lower	232430	183	787.334
		Sum	upper	271593	279	2	1027.27	0.716846						acUVB PI8d 2 IR BSU GFP Ki67 20x1	upper	95598	135	1412.16				P8d 2 IR BSO
			lower	535893	764	9	1425.66	1.17801							lower	220525	260	1179				area	DAPI	GFP	Ki67	GFP area mm2	%Ki67
														acUVB PI8d 2 IR BSU GFP Ki67 20x2	upper	64878	68	1048.12			upper	396750	955	371	7	935.099	1.88679
															lower	177437	192	1082.07			lower	1.85387e+06	3300	1775	9	957.458	0.507042
														Sum	upper	364303	306	839.96
															lower	1177193	1238	1051.65
		acUVB b cat
		UV GFP b cat PI1d BSO 20x2	upper	66836	74	17	1107.19	22.973
			lower	200009	488	146	2439.89	29.918
		UV GFP PI1d BSU 20x1	upper	65497	46	4	702.322	8.69565
			lower	237932	415	124	1744.2	29.8795
		Sum	upper	132333	120	21	906.803	17.5
			lower	437941	903	270	2061.92	29.9003
		Pi8d H PDGFGFP Ki67 Itga6 20x1	upper	114841	177	24	1541.26	13.5593
			lower	288111	712	80	2471.27	11.236
		Pi8d H PDGFGFP Ki67 Itga6 20x2	upper	89972	117	17	1300.4	14.5299
			lower	253735	644	41	2538.08	6.36646
		Pi8d H PDGFGFP Ki67 Itga6 20x3	upper	105866	158	30	1492.45	18.9873
			lower	341873	864	113	2527.25	13.0787
		Pi8d H PDGFGFP Ki67 Itga6 20x4	upper	135414	168	26	1240.64	15.4762
			lower	295803	746	65	2521.95	8.71314
		Sum	upper	446093	620	97	1389.84	15.6452
			lower	1179522	2966	299	2514.58	10.0809
		Pi8d I PDGFGFP Ki67 Itga6 20x1	upper	132964	184	9	1383.83	4.8913
			lower	369863	690	22	1865.56	3.18841
		Pi8d I PDGFGFP Ki67 Itga6 20x2	upper	124492	201	2	1614.56	0.995025
			lower	332929	738	64	2216.69	8.67209
		Pi8d I PDGFGFP Ki67 Itga6 20x3	upper	130000	172	5	1323.08	2.90698
			lower	358980	808	74	2250.82	9.15842
		Sum	upper	387456	557	16	1437.58	2.87253
			lower	1061772	2236	160	2105.91	7.15564
		UV GFP b cat 1 PI8d BSO 20x2	upper	79453	77	9	969.126	11.6883
			lower	380353	826	33	2171.67	3.99516
		UV GFP b cat 1 PI8d BSO 20x3	upper	73228	65	11	887.639	16.9231
			lower	318934	729	19	2285.74	2.60631
		Sum	upper	152681	142	20	930.044	14.0845
			lower	699287	1555	52	2223.69	3.34405
		UV GFP b cat 1 PI8d BSU 20x1	upper	67695	91	16	1344.26	17.5824
			lower	279164	633	50	2267.48	7.89889
		UV GFP b cat 1 PI8d BSO 20x2	upper	85994	102	17	1186.13	16.6667
			lower	357173	791	54	2214.61	6.8268
		UV GFP b cat 1 PI8d BSO 20x3	upper	51292	44	1	857.834	2.27273
			lower	229942	448	33	1948.32	7.36607
		Sum	upper	204981	237	34	1156.2	14.346
			lower	866279	1872	137	2160.97	7.31838
	PI8d UV b cat	Sum	upper	357662	379	54	1059.66	14.248
	combined BSU and BSO		lower	1565566	3427	189	2188.98	5.51503
		UV GFP b cat2 PI1d BSU 20x1	upper	62136	62	2	997.811	3.22581
			lower	258475	340	68	1315.41	20
		UV GFP b cat2 PI1d BSU 20x2	upper	76799	63	2	820.323	3.1746
			lower	280875	354	71	1260.35	20.0565
		Sum	upper	138935	125	4	899.701	3.2
			lower	539350	694	139	1286.73	20.0288
		UV GFP b cat2 PI8d BSO 20x1	upper	62832	45	3	716.196	6.66667
			lower	302306	612	71	2024.44	11.6013
		UV GFP b cat2 PI8d BSO 20x2	upper	96170	100	12	1039.83	12
			lower	265864	498	41	1873.14	8.23293
		UV GFP b cat2 PI8d BSO 20x3	upper	85350	87	23	1019.33	26.4368
			lower	353158	546	37	1546.05	6.77656
		Sum	upper	244352	232	38	949.45	16.3793
			lower	921328	1656	149	1797.41	8.99758
		UV GFP b cat2 PI8d BSU 20x1	upper	65483	61	9	931.539	14.7541
			lower	257842	533	15	2067.16	2.81426
		UV GFP b cat2 PI8d BSU 20x2	upper	54069	63	2	1165.18	3.1746
			lower	316738	723	28	2282.64	3.87275
		Sum	upper	119552	124	11	1037.21	8.87097
			lower	574580	1256	43	2185.94	3.42357
	PI8d 2 UV b cat	Sum	upper	363904	356	49	978.28	13.764
	combined BSU and BSO		lower	1495908	2912	192	1946.64	6.59341
		UV GFP b cat2 PI11d BSO 20x1	upper	80969	53	1	654.572	1.88679
			lower	275697	586	27	2125.52	4.60751
		UV GFP b cat2 PI11d BSO 20x2	upper	63987	94	5	1469.05	5.31915
			lower	288249	740	26	2567.22	3.51351
		Sum	upper	144956	147	6	1014.1	4.08163
			lower	563946	1326	53	2351.29	3.99698
		UV GFP b cat2 PI11d BSU 20x1	upper	53407	66	3	1235.79	4.54545
			lower	216789	469	33	2163.39	7.03625
		UV GFP b cat2 PI11d BSU 20x2	upper	67721	65	5	959.82	7.69231
			lower	298837	623	17	2084.75	2.72873
		Sum	upper	121128	131	8	1081.5	6.10687
			lower	515626	1092	50	2117.81	4.57875
	PI8d UV b cat	Sum	upper	266084	278	14	1044.78	5.03597
	combined BSU and BSO		lower	1079572	2418	103	2239.78	4.25972
