# Supplementary material for: Role of distinct fibroblast lineages and immune cells in dermal repair following UV radiation-induced tissue damage
Source: eLife journal article supplement (doi:10.7554/elife.71052), 2021-12-23
Supplement: supp [file elife-71052-supp-v1.zip › elife_poa_e71052_Figure_6_figure_supplement_1_source_data_1.xlsx]

## Sheet: Figure S6B
	Summary of immune cell analysis after 1 and 5 days post-acUVB exposure (absolute no.)
	acUVB PI 1 day
	Control				UVB
	1A	1B	1C		2A	2B	2C
CD4+	344	443	252		365	277	335	246
	Control				UVB
Mouse no	1A	1B	1C		2A	2B	2C
CD8+	53	37	30		212	76	46	45
	Control				UVB
Mouse no	1A	1B	1C		2A	2B	2C
Teffs	132	164	80		167	109	144	101
	Control				UVB
Mouse no	1A	1B	1C		2A	2B	2C
Neuts	980	254	311		2340	1012	893	920
	Control				UVB
Mouse no	1A	1B	1C		2A	2B	2C
Macs	101	240	283		332	190	110	83
	Control				UVB
Mouse no	1A	1B	1C		2A	2B	2C
DCs	2245	3011	3253		1225	1347	2354	2984
	acUVB PI 5 days
	Control				UVB
Mouse no	1A	1B	1C		2A	2B	2C
CD8+	61	197	219		729	415	683
	Control				UVB
Mouse no	1A	1B	1C		2A	2B	2C
CD8+:Ki67+	2	31	31		184	122	141
	Control				UVB
Mouse no	1A	1B	1C		2A	2B	2C
CD8+: CD25+	0	0	0		1	2	1
	Control				UVB
Mouse no	1A	1B	1C		2A	2B	2C
Teffs	189	412	404		441	772	477
	Control				UVB
Mouse no	1A	1B	1C		2A	2B	2C
Teffs:Ki67+	19	36	42		123	60	105
	Control				UVB
Mouse no	1A	1B	1C		2A	2B	2C
Teffs: CD25+	35	148	71		17	182	39
	Control				UVB
Mouse no	1A	1B	1C		2A	2B	2C
Tregs	354	632	626		537	1183	1013
	Control				UVB
Mouse no	1A	1B	1C		2A	2B	2C
Tregs:Ki67+	24	41	42		105	114	165
	Control				UVB
Mouse no	1A	1B	1C		2A	2B	2C
Tregs: CD25+	229	481	435		334	860	692

## Sheet: Figure S6C
	Summary CD3+ cells per mm IFE
	Control			acUVB
CD3	23.005	22.5526	20.9221	7.48769	5.10547	3.44441
acUVB
	cells	pixel	mm	cells per mm
UV acute 2A	5	1024	0.63488	7.8755
UV acute 2A 2	8	1083	0.67146	11.9143
UV acute 2A 3	14	3709	2.29958	6.08807
sum	27	5816	3.60592	7.48769
UV acute 2B	13	3739	2.31818	5.60785
UV acute 2B 2	11	3843	2.38266	4.61669
sum	24	7582	4.70084	5.10547
UV acute 2C	6	3382	2.09684	2.86145
UV acute 2C2	9	3642	2.25804	3.98576
sum	15	7024	4.35488	3.44441
Control
	cells	pixel	mm	cells per mm
UV crtl 1A	58	4185	2.5947	22.3533
UV crtl 1A 2	68	4649	2.88238	23.5916
sum	126	8834	5.47708	23.005
UV crtl 1B	54	4134	2.56308	21.0684
UV crtl 1B2	62	4162	2.58044	24.0269
sum	116	8296	5.14352	22.5526
UV crtl 1C	50	3795	2.3529	21.2504
UV crtl 1C 2	49	3837	2.37894	20.5974
	99	7632	4.73184	20.9221

## Sheet: Figure S6D
	Summary of CD4+ cells in LN (Absolute no.)
	Control	UVB	UVBCD4	UVBCD8
Mouse 1	1440193	1836664	0	453833
Mouse 2	1548718	1465652	0	818951
Mouse 3	2669613	1393565	0	4368716
Mouse 4	2821148	1246262	0	3328951

## Sheet: Figure S6E
	Summary of CD8+ cells in LN (Absolute no.)
	Control	UVB	UVBCD4	UVBCD8
Mouse 1	1260520	1572796	1855096	1003
Mouse 2	1093530	1125791	3722290	2998
Mouse 3	1455383	1064775	1323630	6763
Mouse 4	2194792	794993	6367977	2235

## Sheet: Figure S6F
	Summary of IFE Ki67 with immune cell depeltion (%)
	Control	UV	CD4	CD8
Mouse 1	28.0576	16.6667	47.2637	54.0404
Mouse 2	24.3822	32.4627	39.0306	43.4389
Mouse 3	13.5246	56.1331	27.9129	21.9512
Mouse 4	27.3239	30.5621	28.9227	50.7075
	DAPI scale 2 200 filter 20-3000; Ki67 scale 3 60 filter 20-3000
		DAPI	Ki67	% Ki67
	2AM CD8 aSMA Ki67 20x2	160	38	0.2375
	2AM CD8 aSMA Ki67 20x3	209	43	0.205742
	sum	369	81	21.9512
		DAPI	Ki67	% Ki67
	2BM CD8 aSMA Ki67 20x2	128	68	0.53125
	2BM CD8 aSMA Ki67 20x3	78	25	0.320513
	2BM CD8 aSMA Ki67 20x3	218	122	0.559633
	sum	424	215	50.7075
		DAPI	Ki67	% Ki67
	2A m CD8 GFP Ki67 aSMAx1	29	19	0.655172
		98	55	0.561224
		71	33	0.464789
		198	107	54.0404
		DAPI	Ki67	% Ki67
	2B m CD8 GFP Ki67 aSMAx1	221	96	43.4389
		DAPI	Ki67	% Ki67
	3AM CD4 aSMA Ki67 20x1	233	59	0.253219
	3AM CD4 aSMA Ki67 20x2	304	51	0.167763
	3AM CD4 aSMA Ki67 20x$	244	108	0.442623
	sum	781	218	27.9129
		DAPI	Ki67	% Ki67
	3BM CD4 aSMA Ki67 20x1	315	90	0.285714
	3BM CD4 aSMA Ki67 20x2	168	66	0.392857
	3BM CD4 aSMA Ki67 20x3	155	35	0.225806
	3BM CD4 aSMA Ki67 20x3	216	56	0.259259
	sum	854	247	28.9227
		DAPI	Ki67	% Ki67
	3A m CD4 GFP Ki67 aSMAx1	201	95	47.2637
		DAPI	Ki67	% Ki67
	3B m CD4 GFP Ki67 aSMAx1	65	35	0.538462
		327	118	0.360856
	sum	392	153	39.0306
		DAPI	Ki67	% Ki67
	4AM UV aSMA Ki67 20x1	269	169	0.628253
	4AM UV aSMA Ki67 20x2	212	101	0.476415
	sum	481	270	56.1331
		DAPI	Ki67	% Ki67
	UV 4B GFP aSMA Ki67 20x1	435	135
	UV 4B GFP aSMA Ki67 20x2	419	126
	sum	854	261	30.5621
		DAPI	Ki67	% Ki67
	4A m UV GFP Ki67 aSMAx1	240	38	0.158333
		288	50	0.173611
	sum	528	88	16.6667
		DAPI	Ki67	% Ki67
	4B m UV GFP Ki67 aSMAx1	228	85	0.372807
	4B m UV GFP Ki67 aSMAx2	308	89	0.288961
	sum	536	174	32.4627
		DAPI	Ki67	% Ki67
	5AM Control aSMA Ki67 20x1	197	44	0.22335
	5AM Control aSMA Ki67 20x2	281	35	0.124555
	5AM Control aSMA Ki67 20x3	254	20	0.0787402
	sum	732	99	13.5246
		DAPI	Ki67	% Ki67
	5BM Control aSMA Ki67 20x1	203	74	0.364532
	5BM Control aSMA Ki67 20x2	227	65	0.286344
	5BM Control aSMA Ki67 20x3	280	55	0.196429
	sum	710	194	27.3239
		DAPI	Ki67	% Ki67
	5A m control GFP Ki67 aSMAx1	73	22	0.30137
	5A m control GFP Ki67 aSMAx2	170	38	0.223529
		313	96	0.306709
	sum	556	156	28.0576
		DAPI	Ki67	% Ki67
	5B m control GFP Ki67 aSMAx1	294	61	0.207483
	5B m control GFP Ki67 aSMAx2	313	87	0.277955
	sum	607	148	24.3822

## Sheet: Figure S6G
		Summary of DAPI+ cells after immune cell depeletion per area (mm2)
		Upper dermis				Lower dermis
	Control	2142.23	1986.29	3014.12	3242.59	2055.89	1924.3	2092.48	2157.36
	UV	2535.78	2050.66	2858.1	2801.7	2581.79	3433.25	3342.83	3058.15
	CD4+_M	1879.73	1333.73	2285.66	1983.93	3192.23	2579.16	4260.89	3151.5
	CD8+_M	2186.95	1375.44	1667.71	2342.06	2851.05	2561.72	3633.78	3625.41
		Detector; GFP S2, 200, Filter 20-3000; DAPI S2, 200, filter10 3000; cCasp3 S3 , 40, Filter 20-3000
	Dermis	area	DAPI+ cells	Desnity		Dermis	area	DAPI+ cells	Desnity
2A m CD8 GFP cCasp3x1	upper	83596	176	2105.36		lower	213691	730	3416.15
2A m CD8 GFP cCasp3x2	upper	63710	169	2652.64		lower	161163	629	3902.88
	Average	147306	345	2342.06		Average	374854	1359	3625.41
2B m CD8 GFP cCasp3x1	upper	102126	206	2017.12		lower	245215	919	3747.73
2B m CD8 GFP cCasp3x2	upper	114338	155	1355.63		lower	360766	1283	3556.32
	Average	216464	361	1667.71		Average	605981	2202	3633.78
Sample		area	DAPI	DAPI per area in mm2
CD8 2A GFP aSMA Ki67 20x1	upper	120376	257
	lower	383641	1250
CD8 2A GFP aSMA Ki67 20x2	upper	108710	244
	lower	424481	1054
Sum	upper	229086	501	2186.95
	lower	808122	2304	2851.05
Sample		area	DAPI	DAPI per area in mm2
CD8 2B GFP aSMA Ki67 20x1	upper	119388	137
	lower	417162	1014
CD8 2B GFP aSMA Ki67 20x2	upper	111810	181
	lower	543910	1448
Sum	upper	231198	318	1375.44
	lower	961072	2462	2561.72
				DAPI					DAPI
	Dermis	area	DAPI+ cells	Desnity		Dermis	area	DAPI+ cells	Desnity
3A m CD4 GFP cCasp3x1	upper	67731	139	2052.24		lower	202573	620	3060.63
3A m CD4 GFP cCasp3x2	upper	106166	206	1940.36		lower	403487	1290	3197.13
	Average	173897	345	1983.93		Average	606060	1910	3151.5
3B m CD4 GFP cCasp3x1	upper	75167	153	2035.47		lower	247101	1044	4224.99
3B m CD4 GFP cCasp3x2	upper	53567	135	2520.21		lower	144213	530	3675.12
3B m CD4 GFP cCasp3x3	upper	49333	119	2412.18		lower	178051	852	4785.15
	Average	178067	407	2285.66		Average	569365	2426	4260.89
Sample		area	DAPI	DAPI per area in mm2
CD4 3A GFP aSMA Ki67 20x1	upper	111546	198
	lower	395369	1302
CD4 3A GFP aSMA Ki67 20x1	upper	152321	298
	lower	407517	1261
Sum	upper	263867	496	1879.73
	lower	802886	2563	3192.23
Sample		area	DAPI	DAPI per area in mm2
CD4 3B GFP aSMA Ki67 20x1	upper	102100	178
	lower	327099	930
CD4 3B GFP aSMA Ki67 20x2	upper	82345	68
	lower	245955	548
Sum	upper	184445	246	1333.73
	lower	573054	1478	2579.16
				DAPI					DAPI
	Dermis	area	DAPI+ cells	Desnity		Dermis	area	DAPI+ cells	Desnity
4A m UV GFP cCasp3x1	upper	84633	257	3036.64		lower	286547	880	3071.05
4A m UV GFP cCasp3x2	upper	93116	241	2588.17		lower	281770	858	3045.04
	Average	177749	498	2801.7		Average	568317	1738	3058.15
4B m UV GFP cCasp3x1	upper	90032	248	2754.58		lower	316250	1095	3462.45
4B m UV GFP cCasp3x2	upper	104853	309	2946.98		lower	290123	932	3212.43
	Average	194885	557	2858.1		Average	606373	2027	3342.83
Sample		area	DAPI	DAPI per area in mm2
UV 4B GFP aSMA Ki67 20x1	upper	149683	405	2705.72
	lower	390970	1080	2762.36
UV 4B GFP aSMA Ki67 20x2	upper	116113	269	2316.71
	lower	392595	943	2401.97
Sum	upper	265796	674	2535.78
	lower	783565	2023	2581.79
Sample		area	DAPI	DAPI per area in mm2
UV 4A GFP aSMA Ki67 20x2	upper	50732	102	2010.57
	lower	168923	470	2782.33
UV 4A GFP aSMA Ki67 20x1	upper	75081	156	2077.76
	lower	228077	893	3915.34
Sum	upper	125813	258	2050.66
	lower	397000	1363	3433.25
				DAPI					DAPI
	Dermis	area	DAPI+ cells	Desnity		Dermis	area	DAPI+ cells	Desnity
5A m Control GFP cCasp3x1	upper	86367	240	2778.84		lower	276634	461	1666.46
5A m Control GFP cCasp3x2	upper	69681	266	3817.4		lower	260134	697	2679.39
	Average	156048	506	3242.59		Average	536768	1158	2157.36
5B m Control GFP cCasp3x1	upper	76066	225	2957.96		lower	231679	430	1856.02
5B m Control GFP cCasp3x2	upper	92142	282	3060.49		lower	343715	774	2251.87
	Average	168208	507	3014.13		Average	575394	1204	2092.48
Sample		area	DAPI	DAPI per area in mm2
Control 5A GFP aSMA Ki67 20x1	upper	83528	165
	lower	240742	434
Control 5A GFP aSMA Ki67 20x2	upper	77986	181
	lower	298685	675
Sum	upper	161514	346	2142.23
	lower	539427	1109	2055.89
Sample		area	DAPI	DAPI per area in mm2
Control 5B GFP aSMA Ki67 20x1	upper	73183	149
	lower	274754	532
Control 5B GFP aSMA Ki67 20x2	upper	66273	128
	lower	267782	512
Sum	upper	139456	277	1986.29
	lower	542536	1044	1924.3

## Sheet: Figure S6H
		Summary of Fb density per area (mm2) after immune cell depletion (control experiments)
			Upper dermis				Lower dermis
		IgG	1191.59	1448.86	1236.84	1422.62	1932.16	1570.05	1729.88	1159.42
		CD4	1100.53	1280.14	1157.29	1076.09	1577	1847.11	1070.74	905.684
		CD8	1038.78	1274.42	1341.89	1155.78	1366	1613.93	1672.21	1571.81
		IgG UV	575.753	613.837	489.601	458.35	1203.83	1578.98	1678.66	1124.17
PDGFR H2B cells		SD: 3, 100, filter 20
	Control
	Sample		area		PDGFR+
	CD4 1 GFP yH2AX Ki67 20x1	upper	41618		49
		lower	129081		203
	CD4 1 GFP yH2AX Ki67 20x2	upper	62887		90
		lower	166234		263
	CD4 1 GFP yH2AX Ki67 20x1	upper	71495		63
		lower	143552		217
	CD4 1 GFP yH2AX Ki67 20x2	upper	73879		73
		lower	154665		253
	Sum	upper	249879		275	1100.53
		lower	593532		936	1577
	CD4 2 GFP yH2AX Ki67 20x1	upper	31240		46
		lower	89976		159
	CD4 2 GFP yH2AX Ki67 20x2	upper	61563		88
		lower	133544		262
	CD4 2 GFP yH2AX Ki67 20x1	upper	71531		79
		lower	161096		297
	CD4 2 GFP yH2AX Ki67 20x2	upper	66110		82
		lower	158935		286
	Sum	upper	230444		295	1280.14
		lower	543551		1004	1847.11
	CD4 3 GFP yH2AX Ki67 20x1	upper	41248		52
		lower	147460		218
	CD4 3 GFP yH2AX Ki67 20x2	upper	59455		60
		lower	153830		268
	CD4 3 GFP yH2AX Ki67 20x1	upper	71510		65
		lower	382656		296
	CD4 3 GFP yH2AX Ki67 20x2	upper	93062		130
		lower	379806		357
	Sum	upper	265275		307	1157.29
		lower	1063752		1139	1070.74
	CD4 m GFP yH2AX Ki67 20x2	upper	56128		71
		lower	424788		452
	CD4 m GFP yH2AX Ki67 20x3	upper	78619		74
		lower	374608		272
	Sum	upper	134747		145	1076.09
		lower	799396		724	905.684
	Control
	Sample		area		PDGFR+
	CD8 1 GFP yH2AX Ki67 20x1	upper	47887		74
		lower	95899		133
	CD8 1 GFP yH2AX Ki67 20x2	upper	54570		48
		lower	141406		193
	CD8 1 GFP yH2AX Ki67 20x1	upper	41981		36
		lower	99867		145
	CD8 1 GFP yH2AX Ki67 20x2	upper	72163		67
		lower	119637		153
	Sum	upper	216601		225	1038.78
		lower	456809		624	1366
	CD8 2 GFP yH2AX Ki67 20x1	upper	47887		74
		lower	95899		133
	CD8 2 GFP yH2AX Ki67 20x2	upper	55066		63
		lower	111633		203
	CD8 2 GFP yH2AX Ki67 20x1	upper	50137		56
		lower	115236		190
	CD8 2 GFP yH2AX Ki67 20x2	upper	45431		60
		lower	133263		210
	Sum	upper	198521		253	1274.42
		lower	456031		736	1613.93
	CD8 3 GFP yH2AX Ki67 20x1	upper	62666		97
		lower	149609		237
	CD8 3 GFP yH2AX Ki67 20x2	upper	72548		98
		lower	102992		194
	CD8 3 GFP yH2AX Ki67 20x1	upper	60472		82
		lower	148710		245
	CD8 3 GFP yH2AX Ki67 20x2	upper	66630		75
		lower	156034		256
	Sum	upper	262316		352	1341.89
		lower	557345		932	1672.21
	CD8 4 GFP yH2AX Ki67 20x1	upper	61396		81
		lower	171831		281
	CD8 4 GFP yH2AX Ki67 20x2	upper	71300		86
		lower	159783		249
	CD8 4 GFP yH2AX Ki67 20x1	upper	49789		53
		lower	123492		189
	CD8 4 GFP yH2AX Ki67 20x2	upper	58045		58
		lower	183650		285
	Sum	upper	240530		278	1155.78
		lower	638756		1004	1571.81
	Sample		area		PDGFR+
	IgG 1 GFP yH2AX Ki67 20x1	upper	61118		65
		lower	119855		211
	IgG 1 GFP yH2AX Ki67 20x2	upper	37012		29
		lower	67761		117
	IgG 1 GFP yH2AX Ki67 20x1	upper	61971		91
		lower	119882		287
	IgG 1 GFP yH2AX Ki67 20x2	upper	58095		75
		lower	129837		230
	Sum	upper	218196		260	1191.59
		lower	437335		845	1932.16
	IgG 2 GFP yH2AX Ki67 20x1	upper	54103		84
		lower	159523		208
	IgG 2 GFP yH2AX Ki67 20x2	upper	60218		91
		lower	158342		250
	IgG 2 GFP yH2AX Ki67 20x1	upper	63171		86
		lower	142475		250
	IgG 2 GFP yH2AX Ki67 20x2	upper	50273		69
		lower	134545		226
	Sum	upper	227765		330	1448.86
		lower	594885		934	1570.05
	IgG 3 GFP yH2AX Ki67 20x1	upper	56816		74
		lower	122726		228
	IgG 3 GFP yH2AX Ki67 20x2	upper	54724		74
		lower	130914		228
	IgG 3 GFP yH2AX Ki67 20x1	upper	63890		74
		lower	146609		245
	IgG 3 GFP yH2AX Ki67 20x2	upper	63890		74
		lower	146609		245
	Sum	upper	239320		296	1236.84
		lower	546858		946	1729.88
	IgG m GFP yH2AX Ki67 20x2	upper	87776		113
		lower	335494		347
	IgG m GFP yH2AX Ki67 20x3	upper	82625		124
		lower	384917		468
	IgG m GFP yH2AX Ki67 20x2	upper	88592		126
		lower	331337		399
	IgG m GFP yH2AX Ki67 20x3	upper	73491		110
		lower	289443		341
	Sum	upper	332484		473	1422.62
		lower	1341191		1555	1159.42
	Sample		area	DAPI	PDGFR+
	IgG UV 1 GFP yH2AX Ki67 20x1	upper	56750	76	5
		lower	140181	686	195
	IgG UV 1 GFP yH2AX Ki67 20x2	upper	100141	148	24
		lower	187521	841	297
	IgG UV 1 GFP yH2AX Ki67 20x3	upper	121465	283	67
		lower	235904	1142	407
	IgG UV 1 GFP yH2AX Ki67 20x1	upper	72040		55
		lower	253362		266
	IgG UV 1 GFP yH2AX Ki67 20x2	upper	105904		77
		lower	254525		214
	IgG UV 1 GFP yH2AX Ki67 20x3	upper	90810		87
		lower	330697		309
	Sum	upper	547110		315	575.753
		lower	1402190		1688	1203.83
	IgG UV 2 GFP yH2AX Ki67 20x1	upper	84129	310	55
		lower	114503	695	233
	IgG UV 2 GFP yH2AX Ki67 20x2	upper	80011	189	35
		lower	180310	894	262
	IgG UV 2 GFP yH2AX Ki67 20x3	upper	87012	265	46
		lower	190962	920	366
	IgG UV 2 GFP yH2AX Ki67 20x1	upper	58590		45
		lower	153040		228
	IgG UV 2 GFP yH2AX Ki67 20x2	upper	48647		40
		lower	154812		230
	IgG UV 2 GFP yH2AX Ki67 20x3	upper	96129		58
		lower	193085		239
	Sum	upper	454518		279	613.837
		lower	986712		1558	1578.98
	IgG UV 3 GFP yH2AX Ki67 20x1	upper	78216	174	50
		lower	187907	857	311
	IgG UV 3 GFP yH2AX Ki67 20x2	upper	82621	197	36
		lower	208347	1156	333
	IgG UV 3 GFP yH2AX Ki67 20x3	upper	123566	299	47
		lower	220035	1023	373
	IgG UV 3 GFP yH2AX Ki67 20x1	upper	74013		36
		lower	145010		253
	IgG UV 3 GFP yH2AX Ki67 20x2	upper	97915		49
		lower	155423		256
	IgG UV 3 GFP yH2AX Ki67 20x3	upper	131903		70
		lower	209174		364
	Sum	upper	588234		288	489.601
		lower	1125896		1890	1678.66
	IgG UV m GFP yH2AX Ki67 20x1	upper	83288	189	54
		lower	199760	594	173
	IgG UV m GFP yH2AX Ki67 20x2	upper	106869	254	54
		lower	227801	690	251
	IgG UV m GFP yH2AX Ki67 20x3	upper	83489	186	60
		lower	381433	1204	428
	IgG UV m GFP yH2AX Ki67 20x1	upper	103996		27
		lower	170897		201
	IgG UV m GFP yH2AX Ki67 20x2	upper	84499		18
		lower	106578		112
	IgG UV m GFP yH2AX Ki67 20x3	upper	153110		69
		lower	193581		274
	Sum	upper	615251		282	458.35	613.932
		lower	1280050		1439	1124.17	1053.16

## Sheet: Figure S6I
		Summary of Ki67+ Fbs (%) after immune cell depletion (control experiments)
			Upper dermis				Lower dermis
		IgG	1.06383	1.71429	2.02703	1.68776	6.09756	1.96507	1.97368	0.368098
		CD4	1.43885	2.23881	0	0.689655	1.71674	4.75059	3.49794	0.690608
		CD8	2.45902	0.729927	1.02564	0.598802	0.613497	2.38095	1.62413	1.13208
		IgG UV	13.5417	9.55882	3.7594	1.78571	6.45161	4.06504	3.24484	1.29108
PDGFR H2B cells		SD: 3, 100, filter 20
DAPI		SD: 3, 200, filter 20
yH2Ax		SD:4, 60, filter 20
Control
Sample		area		PDGFR+	Ki67+	Ki67+ PDGFR+			PDGFRper area in mm2	Ki67 positive Fb%
CD4 1 GFP yH2AX Ki67 20x1	upper	41618		49	4	1			1177.38	2.04082
	lower	129081		203	124	4			1572.66	1.97044
CD4 1 GFP yH2AX Ki67 20x2	upper	62887		90	8	1			1431.14	1.11111
	lower	166234		263	180	4			1582.11	1.52091
Sum	upper	104505		139	12	2			1330.08	1.43885
	lower	295315		466	304	8			1577.98	1.71674
CD4 2 GFP yH2AX Ki67 20x1	upper	31240		46	9	2			1472.47	4.34783
	lower	89976		159	74	7			1767.14	4.40252
CD4 2 GFP yH2AX Ki67 20x2	upper	61563		88	7	1			1429.43	1.13636
	lower	133544		262	104	13			1961.9	4.96183
Sum	upper	92803		134	16	3			1443.92	2.23881
	lower	223520		421	178	20			1883.5	4.75059
CD4 3 GFP yH2AX Ki67 20x1	upper	41248		52	5	0			1260.67	0
	lower	147460		218	65	10			1478.37	4.58716
CD4 3 GFP yH2AX Ki67 20x2	upper	59455		60	4	0			1009.17	0
	lower	153830		268	94	7			1742.18	2.61194
Sum	upper	100703		112	9	0			1112.18	0
	lower	301290		486	159	17			1613.06	3.49794
CD4 m GFP yH2AX Ki67 20x2	upper	56128		71	4	1			1264.97	1.40845
	lower	424788		452	51	5			1064.06	1.10619
CD4 m GFP yH2AX Ki67 20x3	upper	78619		74	5	0			941.248	0
	lower	374608		272	24	0			726.092	0
Sum	upper	134747		145	9	1			1076.09	0.689655
	lower	799396		724	75	5			905.684	0.690608
Control
Sample		area		PDGFR+	Ki67+	Ki67+ PDGFR+			PDGFRper area in mm2	Ki67 positive Fb%
CD8 1 GFP yH2AX Ki67 20x1	upper	47887		74	29	2			1545.3	2.7027
	lower	95899		133	92	1			1386.88	0.75188
CD8 1 GFP yH2AX Ki67 20x2	upper	54570		48	13	1			879.604	2.08333
	lower	141406		193	49	1			1364.86	0.518135
Sum	upper	102457		122	42	3			1190.74	2.45902
	lower	237305		326	141	2			1373.76	0.613497
CD8 2 GFP yH2AX Ki67 20x1	upper	47887		74	29	1			1545.3	1.35135
	lower	95899		133	92	2			1386.88	1.50376
CD8 2 GFP yH2AX Ki67 20x2	upper	55066		63	20	0			1144.08	0
	lower	111633		203	98	6			1818.46	2.95567
Sum	upper	102953		137	49	1			1330.7	0.729927
	lower	207532		336	190	8			1619.03	2.38095
CD8 3 GFP yH2AX Ki67 20x1	upper	62666		97	14	1			1547.89	1.03093
	lower	149609		237	65	5			1584.13	2.1097
CD8 3 GFP yH2AX Ki67 20x2	upper	72548		98	10	1			1350.83	1.02041
	lower	102992		194	34	2			1883.64	1.03093
Sum	upper	135214		195	24	2			1442.16	1.02564
	lower	252601		431	99	7			1706.25	1.62413
CD8 4 GFP yH2AX Ki67 20x1	upper	61396		81	4	0			1319.3	0
	lower	171831		281	34	2			1635.33	0.711744
CD8 4 GFP yH2AX Ki67 20x2	upper	71300		86	5	1			1206.17	1.16279
	lower	159783		249	63	4			1558.36	1.60643
Sum	upper	132696		167	9	1			1258.52	0.598802
	lower	331614		530	97	6			1598.24	1.13208
Control
Sample		area		PDGFR+	Ki67+	Ki67+ PDGFR+			PDGFRper area in mm2	Ki67 positive Fb%
IgG UV 1 GFP yH2AX Ki67 20x1	upper	56750		5	2	0			88.1057	0
	lower	140181		195	11	6			1391.06	3.07692
IgG UV 1 GFP yH2AX Ki67 20x2	upper	100141		24	12	2			239.662	8.33333
	lower	187521		297	84	22			1583.82	7.40741
IgG UV 1 GFP yH2AX Ki67 20x3	upper	121465		67	31	11			551.599	16.4179
	lower	235904		407	112	30			1725.28	7.37101
Sum	upper	278356		96	45	13			344.882	13.5417
	lower	563606		899	207	58			1595.09	6.45161
IgG UV 2 GFP yH2AX Ki67 20x1	upper	84129		55	22	5			653.758	9.09091
	lower	114503		233	61	9			2034.88	3.86266
IgG UV 2 GFP yH2AX Ki67 20x2	upper	80011		35	17	3			437.44	8.57143
	lower	180310		262	70	9			1453.05	3.43511
IgG UV 2 GFP yH2AX Ki67 20x3	upper	87012		46	23	5			528.663	10.8696
	lower	190962		366	59	17			1916.61	4.64481
Sum	upper	251152		136	62	13			541.505	9.55882
	lower	485775		861	190	35			1772.43	4.06504
IgG UV 3 GFP yH2AX Ki67 20x1	upper	78216		50	6	2			639.255	4
	lower	187907		311	66	9			1655.07	2.89389
IgG UV 3 GFP yH2AX Ki67 20x2	upper	82621		36	9	1			435.725	2.77778
	lower	208347		333	102	13			1598.3	3.9039
IgG UV 3 GFP yH2AX Ki67 20x3	upper	123566		47	21	2			380.364	4.25532
	lower	220035		373	82	11			1695.18	2.94906
Sum	upper	284403		133	36	5			467.646	3.7594
	lower	616289		1017	250	33			1650.2	3.24484
IgG UV m GFP yH2AX Ki67 20x1	upper	83288		54	23	1			648.353	1.85185
	lower	199760		173	26	2			866.039	1.15607
IgG UV m GFP yH2AX Ki67 20x2	upper	106869		54	63	2			505.292	3.7037
	lower	227801		251	94	2			1101.84	0.796813
IgG UV m GFP yH2AX Ki67 20x3	upper	83489		60	10	0			718.658	0
	lower	381433		428	58	7			1122.08	1.63551
Sum	upper	273646		168	96	3			613.932	1.78571
	lower	808994		852	178	11			1053.16	1.29108
Sample		area		PDGFR+	Ki67+	Ki67+ PDGFR+			PDGFRper area in mm2	Ki67 positive Fb%
IgG 1 GFP yH2AX Ki67 20x1	upper	61118		65	12	0			1063.52	0
	lower	119855		211	56	13			1760.46	6.16114
IgG 1 GFP yH2AX Ki67 20x2	upper	37012		29	12	1			783.53	3.44828
	lower	67761		117	65	7			1726.66	5.98291
Sum	upper	98130		94	24	1			957.913	1.06383
	lower	187616		328	121	20			1748.25	6.09756
IgG 2 GFP yH2AX Ki67 20x1	upper	54103		84	13	0			1552.59	0
	lower	159523		208	110	1			1303.89	0.480769
IgG 2 GFP yH2AX Ki67 20x2	upper	60218		91	33	3			1511.18	3.2967
	lower	158342		250	148	8			1578.86	3.2
Sum	upper	114321		175	46	3			1530.78	1.71429
	lower	317865		458	258	9			1440.86	1.96507
IgG 3 GFP yH2AX Ki67 20x1	upper	56816		74	8	1			1302.45	1.35135
	lower	122726		228	75	4			1857.8	1.75439
IgG 3 GFP yH2AX Ki67 20x2	upper	54724		74	5	2			1352.24	2.7027
	lower	130914		228	91	5			1741.6	2.19298
Sum	upper	111540		148	13	3			1326.88	2.02703
	lower	253640		456	166	9			1797.82	1.97368
IgG m GFP yH2AX Ki67 20x2	upper	87776		113	17	4			1287.37	3.53982
	lower	335494		347	12	1			1034.3	0.288184
IgG m GFP yH2AX Ki67 20x3	upper	82625		124	20	0			1500.76	0
	lower	384917		468	37	2			1215.85	0.42735
Sum	upper	170401		237	37	4			1390.84	1.68776
	lower	720411		815	49	3			1131.3	0.368098

## Sheet: Figure S6J
		Summary of cCasp3+ Fbs (%) after immune cell depletion (control experiments)
			Upper dermis				Lower dermis
		IgG	0.60241	0	0	0	0.773694	0.840336	0	1.08108
		CD4	0	0.621118	0.512821		0.851064	0.686106	0.459418
		CD8	0	0	0	0	0.671141	0	0.598802	0.21097
		IgG UV	2.28311	2.7972	1.93548	3.50877	1.7744	2.5825	2.52005	2.72572
PDGFR H2B cells		SD: 3, 100, filter 20
cCasp3		SD:4, 40, filter 20
Control
Sample		area		PDGFR+	cCasp3+	cCasp3+ PDGFR+			PDGFRper area in mm2	cCasp3 positive Fb%
CD4 1 GFP yH2AX Ki67 20x1	upper	71495		63		0			881.181	0
	lower	143552		217		2			1511.65	0.921659
CD4 1 GFP yH2AX Ki67 20x2	upper	73879		73		0			988.102	0
	lower	154665		253		2			1635.79	0.790514
Sum	upper	145374		136	0	0			935.518	0
	lower	298217		470	0	4			1576.03	0.851064
CD4 2 GFP yH2AX Ki67 20x1	upper	71531		79		1			1104.42	1.26582
	lower	161096		297		3			1843.62	1.0101
CD4 2 GFP yH2AX Ki67 20x2	upper	66110		82		0			1240.36	0
	lower	158935		286		1			1799.48	0.34965
Sum	upper	137641		161	0	1			1169.71	0.621118
	lower	320031		583	0	4			1821.7	0.686106
CD4 3 GFP yH2AX Ki67 20x1	upper	71510		65		0			908.964	0
	lower	382656		296		0			773.541	0
CD4 3 GFP yH2AX Ki67 20x2	upper	93062		130		1			1396.92	0.769231
	lower	379806		357		3			939.954	0.840336
Sum	upper	164572		195	0	1			1184.89	0.512821
	lower	762462		653	0	3			856.436	0.459418
Control
Sample		area		PDGFR+	cCasp3+	cCasp3+ PDGFR+			PDGFRper area in mm2	cCasp3 positive Fb%
CD8 1 GFP yH2AX Ki67 20x1	upper	41981		36		0			857.531	0
	lower	99867		145		2			1451.93	1.37931
CD8 1 GFP yH2AX Ki67 20x2	upper	72163		67		0			928.454	0
	lower	119637		153		0			1278.87	0
Sum	upper	114144		103	0	0			902.369	0
	lower	219504		298	0	2			1357.61	0.671141
CD8 2 GFP yH2AX Ki67 20x1	upper	50137		56		0			1116.94	0
	lower	115236		190		0			1648.79	0
CD8 2 GFP yH2AX Ki67 20x2	upper	45431		60		0			1320.68	0
	lower	133263		210		0			1575.83	0
Sum	upper	95568		116	0	0			1213.8	0
	lower	248499		400	0	0			1609.66	0
CD8 3 GFP yH2AX Ki67 20x1	upper	60472		82		0			1356	0
	lower	148710		245		3			1647.5	1.22449
CD8 3 GFP yH2AX Ki67 20x2	upper	66630		75		0			1125.62	0
	lower	156034		256		0			1640.67	0
Sum	upper	127102		157	0	0			1235.23	0
	lower	304744		501	0	3			1644	0.598802
CD8 4 GFP yH2AX Ki67 20x1	upper	49789		53		0			1064.49	0
	lower	123492		189		1			1530.46	0.529101
CD8 4 GFP yH2AX Ki67 20x2	upper	58045		58		0			999.225	0
	lower	183650		285		0			1551.86	0
Sum	upper	107834		111	0	0			1029.36	0
	lower	307142		474	0	1			1543.26	0.21097
Control
Sample		area		PDGFR+	cCasp3+	cCasp3+ PDGFR+			PDGFRper area in mm2	cCasp3 positive Fb%
IgG UV 1 GFP yH2AX Ki67 20x1	upper	72040		55		0			763.465	0
	lower	253362		266		2			1049.88	0.75188
IgG UV 1 GFP yH2AX Ki67 20x2	upper	105904		77		3			727.074	3.8961
	lower	254525		214		5			840.782	2.33645
IgG UV 1 GFP yH2AX Ki67 20x3	upper	90810		87		2			958.044	2.29885
	lower	330697		309		7			934.39	2.26537
Sum	upper	268754		219	0	5			814.872	2.28311
	lower	838584		789	0	14			940.872	1.7744
IgG UV 2 GFP yH2AX Ki67 20x1	upper	58590		45		0			768.049	0
	lower	153040		228		6			1489.81	2.63158
IgG UV 2 GFP yH2AX Ki67 20x2	upper	48647		40		1			822.25	2.5
	lower	154812		230		6			1485.67	2.6087
IgG UV 2 GFP yH2AX Ki67 20x3	upper	96129		58		3			603.356	5.17241
	lower	193085		239		6			1237.8	2.51046
Sum	upper	203366		143	0	4			703.166	2.7972
	lower	500937		697	0	18			1391.39	2.5825
IgG UV 3 GFP yH2AX Ki67 20x1	upper	74013		36		0			486.401	0
	lower	145010		253		6			1744.71	2.37154
IgG UV 3 GFP yH2AX Ki67 20x2	upper	97915		49		2			500.434	4.08163
	lower	155423		256		7			1647.12	2.73438
IgG UV 3 GFP yH2AX Ki67 20x3	upper	131903		70		1			530.693	1.42857
	lower	209174		364		9			1740.18	2.47253
Sum	upper	303831		155	0	3			510.152	1.93548
	lower	509607		873	0	22			1713.08	2.52005
IgG UV m GFP yH2AX Ki67 20x1	upper	103996		27		2			259.625	7.40741
	lower	170897		201		7			1176.15	3.48259
IgG UV m GFP yH2AX Ki67 20x2	upper	84499		18		1			213.02	5.55556
	lower	106578		112		4			1050.87	3.57143
IgG UV m GFP yH2AX Ki67 20x3	upper	153110		69		1			450.656	1.44928
	lower	193581		274		5			1415.43	1.82482
Sum	upper	341605		114	0	4			333.719	3.50877
	lower	471056		587	0	16			1246.14	2.72572
Sample		area		PDGFR+	cCasp3+	cCasp3+ PDGFR+			PDGFRper area in mm2	cCasp3 positive Fb%
IgG 1 GFP yH2AX Ki67 20x1	upper	61971		91	0	0			1468.43	0
	lower	119882		287	2	2			2394.02	0.696864
IgG 1 GFP yH2AX Ki67 20x2	upper	58095		75	1	1			1290.99	1.33333
	lower	129837		230	2	2			1771.45	0.869565
Sum	upper	120066		166	1	1			1382.57	0.60241
	lower	249719		517	4	4			2070.33	0.773694
IgG 2 GFP yH2AX Ki67 20x1	upper	63171		86	0	0			1361.38	0
	lower	142475		250	2	2			1754.69	0.8
IgG 2 GFP yH2AX Ki67 20x2	upper	50273		69	0	0			1372.51	0
	lower	134545		226	2	2			1679.74	0.884956
Sum	upper	113444		155	0	0			1366.31	0
	lower	277020		476	4	4			1718.29	0.840336
IgG 3 GFP yH2AX Ki67 20x1	upper	63890		74		0			1158.24	0
	lower	146609		245		0			1671.11	0
IgG 3 GFP yH2AX Ki67 20x2	upper	63890		74		0			1158.24	0
	lower	146609		245		0			1671.11	0
Sum	upper	127780		148	0	0			1158.24	0
	lower	293218		490	0	0			1671.11	0
IgG m GFP yH2AX Ki67 20x2	upper	88592		126		0			1422.25	0
	lower	331337		399		4			1204.21	1.00251
IgG m GFP yH2AX Ki67 20x3	upper	73491		110		0			1496.78	0
	lower	289443		341		4			1178.12	1.17302
Sum	upper	162083		236	0	0			1456.04	0
	lower	620780		740	0	8			1192.05	1.08108

## Sheet: Figure S6K
			Summary of yH2AX+ Fbs (%) after immune cell depletion (control experiments)
				Upper dermis				Lower dermis
			IgG	2.12766	2.85714	1.35135	4.64135	10.9756	8.73362	5.04386	2.33129
			CD4	0	0.746269	0.892857	3.44828	2.7897	3.08789	4.93827	2.34807
			CD8	0	2.18978	0	1.79641	4.90798	6.25	4.64037	4.33962
			IgG UV	31.25	25.7353	39.0977	36.9048	14.5717	15.331	21.4356	16.9014
PDGFR H2B cells		SD: 3, 100, filter 20
DAPI		SD: 3, 200, filter 20
yH2Ax		SD:4, 60, filter 20
Control
Sample		area		PDGFR+			yH2AX	yH2AX+ PDGFR+	PDGFRper area in mm2			yH2AX positive Fb %
CD4 1 GFP yH2AX Ki67 20x1	upper	41618		49			2	0	1177.38			0
	lower	129081		203			31	5	1572.66			2.46305
CD4 1 GFP yH2AX Ki67 20x2	upper	62887		90			1	0	1431.14			0
	lower	166234		263			50	8	1582.11			3.04183
Sum	upper	104505		139			3	0	1330.08			0
	lower	295315		466			81	13	1577.98			2.7897
CD4 2 GFP yH2AX Ki67 20x1	upper	31240		46			2	1	1472.47			2.17391
	lower	89976		159			31	5	1767.14			3.14465
CD4 2 GFP yH2AX Ki67 20x2	upper	61563		88			5	0	1429.43			0
	lower	133544		262			33	8	1961.9			3.05344
Sum	upper	92803		134			7	1	1443.92			0.746269
	lower	223520		421			64	13	1883.5			3.08789
CD4 3 GFP yH2AX Ki67 20x1	upper	41248		52			4	0	1260.67			0
	lower	147460		218			43	14	1478.37			6.42202
CD4 3 GFP yH2AX Ki67 20x2	upper	59455		60			5	1	1009.17			1.66667
	lower	153830		268			39	10	1742.18			3.73134
Sum	upper	100703		112			9	1	1112.18			0.892857
	lower	301290		486			82	24	1613.06			4.93827
CD4 m GFP yH2AX Ki67 20x2	upper	56128		71			2	2	1264.97			2.8169
	lower	424788		452			50	9	1064.06			1.99115
CD4 m GFP yH2AX Ki67 20x3	upper	78619		74			5	3	941.248			4.05405
	lower	374608		272			26	8	726.092			2.94118
Sum	upper	134747		145			7	5	1076.09			3.44828
	lower	799396		724			76	17	905.684			2.34807
Control
Sample		area		PDGFR+			yH2AX	yH2AX+ PDGFR+	PDGFRper area in mm2			yH2AX positive Fb %
CD8 1 GFP yH2AX Ki67 20x1	upper	47887		74			5	0	1545.3			0
	lower	95899		133			44	11	1386.88			8.27068
CD8 1 GFP yH2AX Ki67 20x2	upper	54570		48			6	0	879.604			0
	lower	141406		193			33	5	1364.86			2.59067
Sum	upper	102457		122			11	0	1190.74			0
	lower	237305		326			77	16	1373.76			4.90798
CD8 2 GFP yH2AX Ki67 20x1	upper	47887		74			5	0	1545.3			0
	lower	95899		133			44	11	1386.88			8.27068
CD8 2 GFP yH2AX Ki67 20x2	upper	55066		63			15	3	1144.08			4.7619
	lower	111633		203			66	10	1818.46			4.92611
Sum	upper	102953		137			20	3	1330.7			2.18978
	lower	207532		336			110	21	1619.03			6.25
CD8 3 GFP yH2AX Ki67 20x1	upper	62666		97			5	0	1547.89			0
	lower	149609		237			48	14	1584.13			5.90717
CD8 3 GFP yH2AX Ki67 20x2	upper	72548		98			4	0	1350.83			0
	lower	102992		194			29	6	1883.64			3.09278
Sum	upper	135214		195			9	0	1442.16			0
	lower	252601		431			77	20	1706.25			4.64037
CD8 4 GFP yH2AX Ki67 20x1	upper	61396		81			6	0	1319.3			0
	lower	171831		281			56	11	1635.33			3.91459
CD8 4 GFP yH2AX Ki67 20x2	upper	71300		86			12	3	1206.17			3.48837
	lower	159783		249			71	12	1558.36			4.81928
Sum	upper	132696		167			18	3	1258.52			1.79641
	lower	331614		530			127	23	1598.24			4.33962
Control
Sample		area		PDGFR+			yH2AX	yH2AX+ PDGFR+	PDGFRper area in mm2			yH2AX positive Fb %
IgG UV 1 GFP yH2AX Ki67 20x1	upper	56750		5			3	2	88.1057			40
	lower	140181		195			31	20	1391.06			10.2564
IgG UV 1 GFP yH2AX Ki67 20x2	upper	100141		24			19	8	239.662			33.3333
	lower	187521		297			92	51	1583.82			17.1717
IgG UV 1 GFP yH2AX Ki67 20x3	upper	121465		67			29	20	551.599			29.8507
	lower	235904		407			121	60	1725.28			14.742
Sum	upper	278356		96			51	30	344.882			31.25
	lower	563606		899			244	131	1595.09			14.5717
IgG UV 2 GFP yH2AX Ki67 20x1	upper	84129		55			14	5	653.758			9.09091
	lower	114503		233			74	36	2034.88			15.4506
IgG UV 2 GFP yH2AX Ki67 20x2	upper	80011		35			11	7	437.44			20
	lower	180310		262			73	41	1453.05			15.6489
IgG UV 2 GFP yH2AX Ki67 20x3	upper	87012		46			17	23	528.663			50
	lower	190962		366			66	55	1916.61			15.0273
Sum	upper	251152		136			42	35	541.505			25.7353
	lower	485775		861			213	132	1772.43			15.331
IgG UV 3 GFP yH2AX Ki67 20x1	upper	78216		50			7	9	639.255			18
	lower	187907		311			76	77	1655.07			24.7588
IgG UV 3 GFP yH2AX Ki67 20x2	upper	82621		36			20	20	435.725			55.5556
	lower	208347		333			88	63	1598.3			18.9189
IgG UV 3 GFP yH2AX Ki67 20x3	upper	123566		47			13	23	380.364			48.9362
	lower	220035		373			89	78	1695.18			20.9115
Sum	upper	284403		133			40	52	467.646			39.0977
	lower	616289		1017			253	218	1650.2			21.4356
IgG UV m GFP yH2AX Ki67 20x1	upper	83288		54			33	26	648.353			48.1481
	lower	199760		173			27	35	866.039			20.2312
IgG UV m GFP yH2AX Ki67 20x2	upper	106869		54			6	13	505.292			24.0741
	lower	227801		251			42	30	1101.84			11.9522
IgG UV m GFP yH2AX Ki67 20x3	upper	83489		60			14	23	718.658			38.3333
	lower	381433		428			62	79	1122.08			18.4579
Sum	upper	273646		168			53	62	613.932			36.9048
	lower	808994		852			131	144	1053.16			16.9014
Sample		area		PDGFR+			yH2AX	yH2AX+ PDGFR+	PDGFRper area in mm2			yH2AX positive Fb %
IgG 1 GFP yH2AX Ki67 20x1	upper	61118		65			3	0	1063.52			0
	lower	119855		211			43	19	1760.46			9.00474
IgG 1 GFP yH2AX Ki67 20x2	upper	37012		29			8	2	783.53			6.89655
	lower	67761		117			47	17	1726.66			14.5299
Sum	upper	98130		94			11	2	957.913			2.12766
	lower	187616		328			90	36	1748.25			10.9756
IgG 2 GFP yH2AX Ki67 20x1	upper	54103		84			11	3	1552.59			3.57143
	lower	159523		208			95	22	1303.89			10.5769
IgG 2 GFP yH2AX Ki67 20x2	upper	60218		91			16	2	1511.18			2.1978
	lower	158342		250			103	18	1578.86			7.2
Sum	upper	114321		175			27	5	1530.78			2.85714
	lower	317865		458			198	40	1440.86			8.73362
IgG 3 GFP yH2AX Ki67 20x1	upper	56816		74			9	1	1302.45			1.35135
	lower	122726		228			41	12	1857.8			5.26316
IgG 3 GFP yH2AX Ki67 20x2	upper	54724		74			4	1	1352.24			1.35135
	lower	130914		228			39	11	1741.6			4.82456
Sum	upper	111540		148			13	2	1326.88			1.35135
	lower	253640		456			80	23	1797.82			5.04386
IgG m GFP yH2AX Ki67 20x2	upper	87776		113			14	6	1287.37			5.30973
	lower	335494		347			29	8	1034.3			2.30548
IgG m GFP yH2AX Ki67 20x3	upper	82625		124			18	5	1500.76			4.03226
	lower	384917		468			47	11	1215.85			2.35043
Sum	upper	170401		237			32	11	1390.84			4.64135
	lower	720411		815			76	19	1131.3			2.33129
