# Supplementary material for: Role of distinct fibroblast lineages and immune cells in dermal repair following UV radiation-induced tissue damage
Source: eLife journal article supplement (doi:10.7554/elife.71052), 2021-12-23
Supplement: supp [file elife-71052-supp-v1.zip › elife_poa_e71052_Figure_6_source_data_1.xlsx]

## Sheet: Figure 6A
	Summary of CD3+ cells in the dermis per area mm2
	Upper dermis				Lower dermis
Control	76.9655	76.4078	55.1715	61.677	92.2025	91.36	65.7407	37.7178
acUVB	192.415	103.04	120.552	222.167	129.037	84.1142	223.619	73.8505
	CD3	Spot detector settings: scale 4 sensitivity 40 and Size filter 20-3000
		cell count		area in µm2		positive cells /area in mm2
		upper	lower	upper	lower	upper	lower
	UV acute 2A	1	15	101917	308955	9.81191	48.5508
	UV acute 2A 2	5	5	29095	65978	171.851	75.7828
	UV acute 2A 3	6	14	28073	81267	213.728	172.272
	sum	11	19	57168	147245	192.415	129.037
	UV acute 2B	13	20	81383	211623	159.739	94.5077
	UV acute 2B 2	4	20	83601	263921	47.8463	75.7803
	sum	17	40	164984	475544	103.04	84.1142
	UV acute 2C	6	50	65138	224500	92.1121	222.717
	UV acute 2C2	14	61	100765	271880	138.937	224.364
	sum	20	111	165903	496380	120.552	223.619
	UV acute PI3 2D	32	25	150073	319057	213.23	78.3559
	UV acute PI3 2D 2	38	19	165006	276741	230.295	68.6563
		70	44	315079	595798	222.167	73.8505
	UV crtl 1A	6	29	75499	185305	79.4713	156.499
	UV crtl 1A 2	6	16	80415	302751	74.6129	52.8487
	sum	12	45	155914	488056	76.9655	92.2025
	UV crtl 1B	10	29	73842	246762	135.424	117.522
	UV crtl 1B2	2	15	83210	234849	24.0356	63.8708
	sum	12	44	157052	481611	76.4078	91.36
	UV crtl 1C	3	13	63538	245582	47.2158	52.9355
	UV crtl 1C 2	4	17	63339	210756	63.1522	80.662
	sum	7	30	126877	456338	55.1715	65.7407
	UV crtl 1D	6	10	85031	267258	70.5625	37.417
	UV crtl 1D 2	2	5	44677	130432	44.7658	38.3342
		8	15	129708	397690	61.677	37.7178

## Sheet: Figure 6B
	Summary of CD8+ cells in the dermis per area (mm2)
	Upper dermis				Lower dermis
Control	95.8387	92.4394	123.318		232.134	196.454	145.722
acUVB	139.752	150.49	233.339		148.945	169.818	227.921
	CD8	Spot detector settings: scale 4 sensitivity 50 and Size filter 40-3000
		cell count		area in µm2		positive cells /area in mm2
		upper	lower	upper	lower	upper	lower
	UV acute 2A	21	64	73834	276746	284.422	231.259
	UV acute 2A 2	20	84	101876	372602	196.317	225.442
	sum	41	148	175710	649348	233.339	227.921
	UV acute 2B	12	34	99809	250617	120.23	135.665
	UV acute 2B 2	19	49	106185	238141	178.933	205.76
	sum	31	83	205994	488758	150.49	169.818
	UV acute 2C	15	31	105238	217019	142.534	142.845
	UV acute 2C2	24	67	106763	302292	224.797	221.64
	sum	39	98	212001	519311	183.961	188.712
	UV crtl 1A	8	45	73708	177699	108.536	253.237
	UV crtl 1A 2	7	54	82805	248779	84.536	217.06
	sum	15	99	156513	426478	95.8387	232.134
	UV crtl 1B	10	32	108097	200526	92.5095	159.58
	UV crtl 1B2	9	51	97443	221965	92.3617	229.766
	sum	19	83	205540	422491	92.4394	196.454
	UV crtl 1C	3	34	72240	229387	41.5282	148.221
	UV crtl 1C 2	15	25	73724	175494	203.462	142.455
	sum	18	59	145964	404881	123.318	145.722

## Sheet: Figure 6C
	Summary of FoxP3+ cells in the dermis per area (mm2)
	Upper dermis				Lower dermis
Control	76.802	74.8214	87.4218		100.558	90.3743	106.881
acUVB	219.803	177.156	187.928		185.021	126.516	194.432
	FoxP3	Spot detector settings: scale 3 sensitivity 40 and Size filter 20-3000
		cell count		area in µm2		positive cells /area in mm2
		upper	lower	upper	lower	upper	lower
	UV acute 2A	21	45	88768	249033	236.572	180.699
	UV acute 2A 2	20	53	97763	280636	204.576	188.857
	sum	41	98	186531	529669	219.803	185.021
	UV acute 2B	11	18	58730	140155	187.298	128.429
	UV acute 2B 2	13	16	76744	128585	169.394	124.431
	sum	24	34	135474	268740	177.156	126.516
	UV acute 2C	16	37	86277	236421	185.449	156.5
	UV acute 2C2	14	64	73359	283042	190.842	226.115
	sum	30	101	159636	519463	187.928	194.432
	UV crtl 1A	4	11	80122	190966	49.9239	57.6019
	UV crtl 1A 2	8	38	76124	296317	105.092	128.241
	sum	12	49	156246	487283	76.802	100.558
	UV crtl 1B	9	21	87288	263952	103.107	79.5599
	UV crtl 1B2	3	23	73094	222912	41.043	103.18
	sum	12	44	160382	486864	74.8214	90.3743
	UV crtl 1C	7	20	58101	150013	120.48	133.322
	UV crtl 1C 2	3	12	56287	149385	53.2983	80.3294
	sum	10	32	114388	299398	87.4218	106.881

## Sheet: Figure 6D
		Summary of CD4 cell depletion in the skin (Absolute numbers)
	Control					anti-CD4
	2668	2234	2498	1659	1370	0	0	12	0
		Summary of CD4 cell depletion in the skin (Absolute numbers)
	Control				anti-CD8
	488	292	283	166	0	0	0	0

## Sheet: Figure 6F
		Summary of Fb desnity after CD4 or CD8 cell depletion per area (mm2)
		Upper dermis				Lower dermis
	Control	1281.62	1312.24	1218.73	1364.96	1206.84	1246	1054.93	1063.77
	UV	516.64	726.121	620.879	978.909	1279.6	1338.75	1027.42	1238.74
	CD4+_M	147.802	227.71	73.0062	247.273	840.717	1054	936.131	1032.9
	CD8+_M	181.662	414.691	41.5774	224.024	641.991	986.237	854.812	1149.78
			Detector; GFP S2, 200, Filter 20-3000; DAPI S2, 200, filter10 3000; cCasp3 S3 , 40, Filter 20-3000
					PDGFRaH2BGFP					PDGFRaH2BGFP
		Dermis	area	PDGFRaH2BEGFP+ cells	Desnity		Dermis	area	PDGFRaH2BEGFP+ cells	Desnity
	2A m CD8 GFP cCasp3x1	upper	83596	21	251.208		lower	213691	242	1132.48
	2A m CD8 GFP cCasp3x2	upper	63710	12	188.353		lower	161163	189	1172.73
		Average	147306	33	224.023		Average	374854	431	1149.78
				9					518
	2B m CD8 GFP cCasp3x1	upper	102126	5	48.9591		lower	245215	198	807.455
	2B m CD8 GFP cCasp3x2	upper	114338	4	34.984		lower	360766	320	887.002
		Average	216464	9	41.5774		Average	605981	518	854.812
	Sample		area	PDGFR+	PDGFRper area in mm2
	CD8 2A GFP aSMA Ki67 20x1	upper	120376	39	323.985
		lower	383641	417	1086.95
	CD8 2A GFP aSMA Ki67 20x2	upper	108710	56	515.132
		lower	424481	380	895.211
	Sum	upper	229086	95	414.691
		lower	808122	797	986.237
	Sample		area	PDGFR+	PDGFRper area in mm2
	CD8 2B GFP aSMA Ki67 20x1	upper	119388	24	201.025
		lower	417162	284	680.791
	CD8 2B GFP aSMA Ki67 20x2	upper	111810	18	160.987
		lower	543910	333	612.234
	Sum	upper	231198	42	181.662
		lower	961072	617	641.991
					PDGFRaH2BGFP					PDGFRaH2BGFP
		Dermis	area	PDGFRaH2BEGFP+ cells	Desnity		Dermis	area	PDGFRaH2BEGFP+ cells	Desnity
	3A m CD4 GFP cCasp3x1	upper	67731	18	265.757		lower	202573	220	1086.03
	3A m CD4 GFP cCasp3x2	upper	106166	25	235.48		lower	403487	406	1006.23
		Average	173897	43	247.273		Average	606060	626	1032.9
	3B m CD4 GFP cCasp3x1	upper	75167	5	66.5186		lower	247101	229	926.747
	3B m CD4 GFP cCasp3x2	upper	53567	6	112.009		lower	144213	133	922.247
	3B m CD4 GFP cCasp3x3	upper	49333	2	40.5408		lower	178051	171	960.399
		Average	178067	13	73.0062		Average	569365	533	936.131
	Sample		area	PDGFR+	PDGFRper area in mm2
	CD4 3A GFP aSMA Ki67 20x1	upper	111546	20	179.298
		lower	395369	364	920.659
	CD4 3A GFP aSMA Ki67 20x1	upper	152321	19	124.737
		lower	407517	311	763.158
	Sum	upper	263867	39	147.802
		lower	802886	675	840.717
	Sample		area	PDGFR+	PDGFRper area in mm2
	CD4 3B GFP aSMA Ki67 20x1	upper	102100	28	274.241
		lower	327099	356	1088.36
	CD4 3B GFP aSMA Ki67 20x2	upper	82345	14	170.016
		lower	245955	248	1008.31
	Sum	upper	184445	42	227.71
		lower	573054	604	1054
					PDGFRaH2BGFP					PDGFRaH2BGFP
		Dermis	area	PDGFRaH2BEGFP+ cells	Desnity		Dermis	area	PDGFRaH2BEGFP+ cells	Desnity
	4A m UV GFP cCasp3x1	upper	84633	123	1453.33		lower	286547	366	1277.28
	4A m UV GFP cCasp3x2	upper	93116	51	547.704		lower	281770	338	1199.56
		Average	177749	174	978.908		Average	568317	704	1238.75
	4B m UV GFP cCasp3x1	upper	90032	52	577.572		lower	316250	332	1049.8
	4B m UV GFP cCasp3x2	upper	104853	69	658.064		lower	290123	291	1003.02
		Average	194885	121	620.879		Average	606373	623	1027.42
	Sample		area	PDGFR+	PDGFRper area in mm2
	UV 4B GFP aSMA Ki67 20x1	upper	149683	122	815.056
		lower	390970	544	1391.41
	UV 4B GFP aSMA Ki67 20x2	upper	116113	71	611.473
		lower	392595	505	1286.31
	Sum	upper	265796	193	726.121
		lower	783565	1049	1338.75
	Sample		area	PDGFR+	PDGFRper area in mm2
	UV 4A GFP aSMA Ki67 20x2	upper	50732	35	689.9
		lower	168923	195	1154.37
	UV 4A GFP aSMA Ki67 20x1	upper	75081	30	399.568
		lower	228077	313	1372.34
	Sum	upper	125813	65	516.64
		lower	397000	508	1279.6
					PDGFRaH2BGFP					PDGFRaH2BGFP
		Dermis	area	PDGFRaH2BEGFP+ cells	Desnity		Dermis	area	PDGFRaH2BEGFP+ cells	Desnity
	5A m Control GFP cCasp3x1	upper	86367	104	1204.16		lower	276634	249	900.106
	5A m Control GFP cCasp3x2	upper	69681	109	1564.27		lower	260134	322	1237.82
		Average	156048	213	1364.96		Average	536768	571	1063.77
	5B m Control GFP cCasp3x1	upper	76066	95	1248.92		lower	231679	232	1001.39
	5B m Control GFP cCasp3x2	upper	92142	110	1193.81		lower	343715	375	1091.02
		Average	168208	205	1218.73		Average	575394	607	1054.93
	Sample		area	PDGFR+	PDGFRper area in mm2
	Control 5A GFP aSMA Ki67 20x1	upper	83528	105	1257.06
		lower	240742	269	1117.38
	Control 5A GFP aSMA Ki67 20x2	upper	77986	102	1307.93
		lower	298685	382	1278.94
	Sum	upper	161514	207	1281.62
		lower	539427	651	1206.84
	Sample		area	PDGFR+	PDGFRper area in mm2
	Control 5B GFP aSMA Ki67 20x1	upper	73183	94	1284.45
		lower	274754	346	1259.31
	Control 5B GFP aSMA Ki67 20x2	upper	66273	89	1342.93
		lower	267782	330	1232.35
	Sum	upper	139456	183	1312.24
		lower	542536	676	1246

## Sheet: Figure 6G
		Summary of yH2AX+ Fbs (%) after immune cell depletion
	Control	UV	CD4	CD8
Mouse 1	6.57895	20.3724	35.0634	44.4941
Mouse 2	7.29023	26.0997	34.4954	46.2549
Mouse 3	1.08597	25.4342	37.2825	38.8037
Mouse 4	7.01867	32.4324	38.2597	39.2294
EGFP	SD: 3, 100, filter 20
H2AX	SD:4, 100, filter 20 but for control SD:4, 60, filter 20
Sample		area	PDGFR+	H2AX	H2AX+ PDGFR+	Ly6+	DAPI	PDGFRper area in mm2	H2AX positive Fb%
ID1 2A CD8 yH2AX Ly6G 20x1	upper	105516	12	59	4	24			33.3333
	lower	480486	449	350	200	47			44.5434
ID1 2A CD8 yH2AX Ly6G 20x2	upper	71384	14	30	9	32			64.2857
	lower	231207	197	183	86	73			43.6548
Sum	upper	176900	26	89	13	56	0	146.976	50
	lower	711693	646	533	286	120	0	907.695	44.2724
	Sum	888593	672	622	299	176		756.252	44.494
						100
Sample		area	PDGFR+	H2AX	H2AX+ PDGFR+	Ly6+	DAPI	PDGFRper area in mm2	H2AX positive Fb%
ID1 2B CD8 yH2AX Ly6G 20x1	upper	104344	5	44	3	36		47.9184	60
	lower	440688	362	273	164	161		821.443	45.3039
ID1 2B CD8 yH2AX Ly6G 20x2	upper	92581	9	33	5	43		97.2122	55.5556
	lower	448641	385	297	180	216		858.147	46.7532
Sum	upper	196925	14	77	8	79	0	71.0931	57.1429
	lower	889329	747	570	344	377	0	839.959	46.0509
	Sum	1086254	761	647	352	456		700.573	46.2549
Sample		area	PDGFR+	H2AX	H2AX+ PDGFR+	Ly6+	DAPI	PDGFRper area in mm2	H2AX positive Fb%
ID2 2A CD8 yH2AX Ly6G 20x1	upper	84905	8	39	2	13			25
	lower	345768	338	255	135	48			39.9408
ID2 2A CD8 yH2AX Ly6G 20x2	upper	103760	14	51	6	13			42.8571
	lower	347202	292	241	110	15			37.6712
Sum	upper	188665	22	90	8	26	0	116.609	36.3636
	lower	692970	630	496	245	63	0	909.13	38.8889
	Sum	881635	652	586	253	89		739.535	38.8037
						100
Sample		area	PDGFR+	H2AX	H2AX+ PDGFR+	Ly6+	DAPI	PDGFRper area in mm2	H2AX positive Fb%
ID2 1B CD8 yH2AX Ly6G 20x1	upper	105030	11	35	2	8		104.732	18.1818
	lower	279279	255	173	107	30		913.065	41.9608
ID2 1B CD8 yH2AX Ly6G 20x2	upper	132472	6	34	1	3		45.2926	16.6667
	lower	389384	299	187	114	7		767.88	38.1271
Sum	upper	237502	17	69	3	11	0	71.5783	17.6471
	lower	668663	554	360	221	37	0	828.519	39.8917
	Sum	906165	571	429	224	48		630.128	39.2294
ID2 2A CD4 yH2AX Ly6G 20x1	upper	100883	15	14	3			148.687	20
	lower	292439	217	126	90			742.035	41.4747
ID2 2A CD4 yH2AX Ly6G 20x2	upper	140685	47	38	12	1		334.08	25.5319
	lower	484344	375	229	139	37		774.243	37.0667
ID2 2A CD4 yH2AX Ly6G 20x3	upper	139229	36	26	6	0		258.567	16.6667
	lower	612464	517	298	200	16		844.131	38.6847
Sum	upper	380797	98	78	21	1	0	257.355	21.4286
	lower	1389247	1109	653	429	53	0	798.274	38.6835
	Sum	1770044	1207	731	450	54	0	681.904	37.2825
Sample		area	PDGFR+	H2AX	H2AX+ PDGFR+	Ly6+	DAPI	PDGFRper area in mm2	H2AX positive Fb%
ID2 2B CD4 yH2AX Ly6G 20x1	upper	112859	16	26	4	4		141.77	25
	lower	518252	371	259	168	22		715.868	45.283
ID2 2B CD4 yH2AX Ly6G 20x2	upper	93335	13	16	4	19		139.283	30.7692
	lower	396274	324	153	101	15		817.616	31.1728
Sum	upper	206194	29	42	8	23	0	140.644	27.5862
	lower	914526	695	412	269	37	0	759.957	38.705
	Sum	1120720	724	454	277	60		646.013	38.2597
Sample		area	PDGFR+	H2AX	H2AX+ PDGFR+	Ly6+	DAPI	PDGFRper area in mm2	H2AX positive Fb%
ID1 3A CD4 yH2AX Ly6G 20x1	upper	148809	38	67	13	68		255.361	34.2105
	lower	397045	341	199	123	181		858.845	36.0704
ID1 3A CD4 yH2AX Ly6G 20x2	upper	125646	46	60	21	64		366.108	45.6522
	lower	472865	442	230	147	236		934.728	33.2579
Sum	upper	274455	84	127	34	132	0	306.061	40.4762
	lower	869910	783	429	270	417	0	900.093	34.4828
	Sum	1144365	867	556	304	549		757.625	35.0634
Sample		area	PDGFR+	H2AX	H2AX+ PDGFR+	Ly6+	DAPI	PDGFRper area in mm2	H2AX positive Fb%
ID1 3B CD4 yH2AX Ly6G 20x1	upper	88757	5	17	1	79		56.3336	20
	lower	314610	264	195	104	220		839.134	39.3939
ID1 3B CD4 yH2AX Ly6G 20x2	upper	92839	4	28	1	45		43.0853	25
	lower	319086	272	168	82	241		852.435	30.1471
Sum	upper	181596	9	45	2	124	0	49.5606	22.2222
	lower	633696	536	363	186	461	0	845.831	34.7015
	Sum	815292	545	408	188	585		668.472	34.4954
Sample		area	PDGFR+	H2AX	H2AX+ PDGFR+	Ly6+	DAPI	PDGFRper area in mm2	H2AX positive Fb%
ID1 4A UV yH2AX Ly6G 20x1	upper	100703	59	51	18	42		585.881	30.5085
	lower	398451	402	143	77	168		1008.91	19.1542
ID1 4A UV yH2AX Ly6G 20x2	upper	91331	52	51	16	50		569.358	30.7692
	lower	321265	400	138	75	181		1245.08	18.75
Sum	upper	192034	111	102	34	92	0	578.023	30.6306
	lower	719716	802	281	152	349	0	1114.33	18.9526
	Sum	911750	913	383	186	441		1001.37	20.3724
Sample		area	PDGFR+	H2AX	H2AX+ PDGFR+	Ly6+	DAPI	PDGFRper area in mm2	H2AX positive Fb%
ID1 4B UV yH2AX Ly6G 20x2	upper	101104	33	61	12	80		326.397	36.3636
	lower	308271	308	177	77	230		999.121	25
	Sum	409375	341	238	89	310	0	832.977	26.0997
Sample		area	PDGFR+	H2AX	H2AX+ PDGFR+	Ly6+	DAPI	PDGFRper area in mm2	H2AX positive Fb%
ID2 3A UV yH2AX Ly6G 20x1	upper	144017	76	77	23	36		527.715	30.2632
	lower	329623	309	95	63	88		937.435	20.3883
ID2 3A UV yH2AX Ly6G 20x2	upper	113068	54	71	17	18		477.589	31.4815
	lower	352039	367	166	102	38		1042.5	27.7929
Sum	upper	257085	130	148	40	54	0	505.669	30.7692
	lower	681662	676	261	165	126	0	991.694	24.4083
	Sum	938747	806	409	205	180		858.591	25.4342
Sample		area	PDGFR+	H2AX	H2AX+ PDGFR+	Ly6+	DAPI	PDGFRper area in mm2	H2AX positive Fb%
ID2 3B UV yH2AX Ly6G 20x1	upper	146132	29	51	9	51		198.451	31.0345
	lower	372180	319	159	91	86		857.112	28.5266
ID2 3B UV yH2AX Ly6G 20x2	upper	116279	19	55	8	43		163.4	42.1053
	lower	277852	225	165	84	95		809.784	37.3333
Sum	upper	262411	48	106	17	94	0	182.919	35.4167
	lower	650032	544	324	175	181	0	836.882	32.1691
	Sum	912443	592	430	192	275		648.808	32.4324
Sample		area	PDGFR+	H2AX	H2AX+ PDGFR+	Ly6+	DAPI	PDGFRper area in mm2	H2AX positive Fb%
ID1 5A Con yH2AX Ly6G 20x1	upper	62644	78	19	4	1		1245.13	5.12821
	lower	234220	251	45	20	4		1071.64	7.96813
ID1 5A Con yH2AX Ly6G 20x3	upper	92566	112	29	6	3		1209.95	5.35714
	lower	322220	319	55	20	3		990.007	6.26959
Sum	upper	155210	190	48	10	4	0	1224.15	5.26316
	lower	556440	570	100	40	7	0	1024.37	7.01754
	Sum	711650	760	148	50	11	0	1067.94	6.57895
				sensitivity 60		sensitivity 30
Sample		area	PDGFR+	H2AX	H2AX+ PDGFR+	Ly6+	DAPI	PDGFRper area in mm2	H2AX positive Fb%
ID1 5B UV yH2AX Ly6G 20x1	upper	121963	133	51	17	6		1090.49	12.782
	lower	220229	253	69	23	16		1148.8	9.09091
ID1 5B UV yH2AX Ly6G 20x2	upper	65134	81	17	3	4		1243.59	3.7037
	lower	210890	260	40	10	3		1232.87	3.84615
Sum	upper	187097	214	68	20	10	0	1143.79	9.34579
	lower	431119	513	109	33	19	0	1189.93	6.43275
	Sum	618216	727	177	53	29		1175.96	7.29023
Sample		area	PDGFR+	H2AX	H2AX+ PDGFR+	Ly6+	DAPI	PDGFRper area in mm2	H2AX positive Fb%
ID2 4A Con yH2AX Ly6G 20x1	upper	94429	143	18	2	13		1514.37	1.3986
	lower	311053	351	35	5	18		1128.43	1.4245
ID2 4A Con yH2AX Ly6G 20x3	upper	97724	149	5	4	3		1524.7	2.68456
	lower	390775	462	9	1	3		1182.27	0.21645
Sum	upper	192153	292	23	6	16	0	1519.62	2.05479
	lower	701828	813	44	6	21	0	1158.4	0.738007
	Sum	893981	1105	67	12	37		1236.04	1.08597
				sensitivity 60		sensitivity 30
Sample		area	PDGFR+	H2AX	H2AX+ PDGFR+	Ly6+	DAPI	PDGFRper area in mm2	H2AX positive Fb%
ID1 4B Con yH2AX Ly6G 20x1	upper	102672	140	39	12	2		1363.57	8.57143
	lower	379493	428	65	24	12		1127.82	5.60748
ID1 4B Con yH2AX Ly6G 20x2	upper	80971	123	23	10	1		1519.06	8.13008
	lower	373101	408	25	9	0		1093.54	2.20588
ID1 4B Con yH2AX Ly6G 20x3	upper	92630	78	28	17	1		842.06	21.7949
	lower	434126	376	70	37	1		866.108	9.84043
Sum	upper	276273	341	90	39	4	0	1234.29	11.437
	lower	1186720	1212	160	70	13	0	1021.3	5.77558
	Sum	1462993	1553	250	109	17	0	1061.52	7.01867

## Sheet: Figure 6H
	Summary of cCasp3+ Fbs (%) after immune cell depletion
		Upper dermis				Lower dermis
	Control	0	0.487805	0.526316	1.11732	0.175131	0.329489	0.787402	0.766284
	UV	3.44828	6.61157	2.5	2.10526	1.5625	0.481541	2.88335	1.47929
	CD4+_M	6.97674	38.4615	17.6471	12.5	0.798722	1.87617	3.33025	3.26264
	CD8+_M	9.09091	33.3333	10.8108	20.4546	2.08817	0.772201	1.99637	3.48331
	DAPI scale 2 200 filter 20-3000			PDGFR scale 3 100, filter 20-3000; cCasp3 scale 3 40 filter 20-3000
			PDGFR	PDGFR/cCasp3	% FB
	2AM CD8 cCASP CD45 20x1	upper	8	1
		lower	287	5
	2AM CD8 cCASP CD45 20x2	upper	29	3
		lower	264	6
		total upper	37	4	10.8108
		total lower	551	11	1.99637
	2BM CD8 cCASP CD45 20x1	upper	56	6
		lower	332	9
	2BM CD8 cCASP CD45 20x2	upper	32	12
		lower	357	15
		total upper	88	18	20.4545
		total lower	689	24	3.48331
		cells	cCasp3+PDGFRa+	%FB			cells	cCasp3+PDGFRa+	% FB
2A m CD8 GFP cCasp3x1	upper	21	2			lower	242	6
2A m CD8 GFP cCasp3x2	upper	12	1			lower	189	3
		31					303
	Average	33	3	9.09091			431	9	2.08817
2B m CD8 GFP cCasp3x1	upper	5	2			lower	198	1
2B m CD8 GFP cCasp3x2	upper	4	1			lower	320	3
	Average	9	3	33.3333		Average	518	4	0.772201
			PDGFR	PDGFR/cCasp3	% FB
	3AM CD4 cCASP CD45 20x1	upper	16	3
		lower	375	7
	3AM CD4 cCASP CD45 20x2	upper	5	0
		lower	305	8
	3AM CD4 cCASP CD45 20x3	upper	13	3
		lower	401	21
		total upper	34	6	17.6471
		total lower	1081	36	3.33025
			PDGFR	PDGFR/cCasp3	% FB
	3BM CD4 cCASP CD45 20x1	upper	28	3
		lower	286	10
	3BM CD4 cCASP CD45 20x2	upper	12	2
		lower	327	10
		total upper	40	5	12.5
		total lower	613	20	3.26264
			cells	cCasp3+PDGFRa+	%FB			cells	cCasp3+PDGFRa+	% FB
	3A m CD4 GFP cCasp3x1	upper	18	2			lower	220	2
	3A m CD4 GFP cCasp3x2	upper	25	1			lower	406	3
			43	3	6.97674			626	5	0.798722
	3B m CD4 GFP cCasp3x1	upper	5	2			lower	229	5
	3B m CD4 GFP cCasp3x2	upper	6	1			lower	133	2
	3B m CD4 GFP cCasp3x3	upper	2	2			lower	171	3
		Average	13	5	38.4615		Average	533	10	1.87617
			PDGFR	PDGFR/cCasp3	% FB
	4AM UV cCASP CD45 20x1	upper	9	0
		lower	360	10
	4AM UV cCASP CD45 20x2	upper	31	1
		lower	403	12
		total upper	40	1	2.5
		total lower	763	22	2.88336
			PDGFR	PDGFR/cCasp3	% FB
	4BM UV cCASP CD45 20x1	upper	42	1
		lower	311	7
	4BM UV cCASP CD45 20x2	upper	53	1
		lower	365	3
		total upper	95	2	2.10526
		total lower	676	10	1.47929
			cells	cCasp3+PDGFRa+	%FB			cells	cCasp3+PDGFRa+	% FB
	4A m UV GFP cCasp3x1	upper	123	1			lower	366	6
	4A m UV GFP cCasp3x2	upper	51	5			lower	338	5
		Average	174	6	3.44828		Average	704	11	1.5625
	4B m UV GFP cCasp3x1	upper	52	3			lower	332	2
	4B m UV GFP cCasp3x2	upper	69	5			lower	291	1
		Average	121	8	6.61157		Average	623	3	0.481541
			PDGFR	PDGFR/cCasp3	% FB
	5AM Control CD45 20x1	upper	99	0
		lower	236	2
	5AM Control CD45 20x2	upper	91	1
		lower	272	2
		total upper	190	1	0.526316
		total lower	508	4	0.787402
			PDGFR	PDGFR/cCasp3	% FB
	5BM Control CD45 20x1	upper	80	2
		lower	202	3
	5BM Control CD45 20x2	upper	99	0
		lower	320	1
		total upper	179	2	1.11732
		total lower	522	4	0.766284
		cells	cCasp3+PDGFRa+	%FB			cells	cCasp3+PDGFRa+	% FB
5A m Control GFP cCasp3x1	upper	104	0			lower	249	1
5A m Control GFP cCasp3x2	upper	109	0			lower	322	0
	Average	213	0	0		Average	571	1	0.175131
5B m Control GFP cCasp3x1	upper	95	1			lower	232	1
5B m Control GFP cCasp3x2	upper	110	0			lower	375	1
	Average	205	1	0.487805		Average	607	2	0.329489

## Sheet: Figure 6I
		Summary of Ki67 + Fbs (%) after immune cell depletion
		Upper dermis				Lower dermis
	Control	1.87793	1.99335	0.793651	0.884956	1.01476	1.46727	0.723208	0.622407
	UV	4.25532	3.32103	4.21053	4.66321	2.8891	2.51908	2.9722	2.09724
	CD4+_M	1.05263	0	0	0	0.733272	1.76298	1.46404	1.67296
	CD8+_M	0	0	0.769231	1.05263	2.21519	2.84414	1.65041	1.41621
Sample		PDGFR+	Ki67+ PDGFR+	% Fbs
2A m CD8 GFP Ki67 aSMAx1	upper	27	0
	lower	252	14
1A CD8 BSL Ki67 aSMA 20x1	upper	9	0
	lower	382	5
1A CD8 BSL Ki67 aSMA 20x2	upper	6	0
	lower	314	2
Sum	upper	42	0	0
	lower	948	21	2.21519
		PDGFR+	Ki67+ PDGFR+	% Fbs
2B m CD8 GFP Ki67 aSMAx1	upper	1	0
	upper	232	12
1B CD8 BSL Ki67 aSMA 20x1	upper	16	0
	lower	389	7
1B CD8 BSL Ki67 aSMA 20x2	upper	11	0
	lower	258	6
Sum	upper	28	0	0
	lower	879	25	2.84414
		PDGFR+	Ki67+ PDGFR+	% Fbs
2AM CD8 aSMA Ki67 20x2	upper	6	0
	lower	216	5
2AM CD8 aSMA Ki67 20x3	upper	29	1
	lower	320	7
CD8 2A GFP aSMA Ki67 20x1	upper	39	0
	lower	417	7
CD8 2A GFP aSMA Ki67 20x2	upper	56	0
	lower	380	3
	total upper	130	1	0.769231
	total lower	1333	22	1.65041
		PDGFR+	Ki67+ PDGFR+	% Fbs
2BM CD8 aSMA Ki67 20x2	upper	12	0
	lower	183	4
2BM CD8 aSMA Ki67 20x3	upper	15	0
	lower	234	7
2BM CD8 aSMA Ki67 20x3	upper	26	1
	lower	237	5
CD8 2B GFP aSMA Ki67 20x1	upper	24	0
	lower	284	0
CD8 2B GFP aSMA Ki67 20x2	upper	18	0
	lower	333	2
	total upper	95	1	1.05263
	total lower	1271	18	1.41621
		PDGFR+	Ki67+ PDGFR+	% Fbs
3AM CD4 aSMA Ki67 20x1	upper	12	0
	lower	298	9
3AM CD4 aSMA Ki67 20x2	upper	9	0
	lower	348	9
3AM CD4 aSMA Ki67 20x$	upper	7	0
	lower	250	3
CD4 3A GFP aSMA Ki67 20x1	upper	20	0
	lower	364	1
CD4 3A GFP aSMA Ki67 20x1	upper	19	0
	lower	311	1
	total upper	67	0	0
	total lower	1571	23	1.46404
		PDGFR+	Ki67+ PDGFR+	% Fbs
3BM CD4 aSMA Ki67 20x1	upper	27	0
	lower	344	9
3BM CD4 aSMA Ki67 20x2	upper	8	0
	lower	381	7
3BM CD4 aSMA Ki67 20x3	upper	10	0
	lower	295	5
3BM CD4 aSMA Ki67 20x3	upper	6	0
	lower	229	5
CD4 3B GFP aSMA Ki67 20x1	upper	28	0
	lower	356	1
CD4 3B GFP aSMA Ki67 20x2	upper	14	0
	lower	248	4
	total upper	93	0	0
	total lower	1853	31	1.67296
		PDGFR+	Ki67+ PDGFR+	% Fbs
3A m CD4 GFP Ki67 aSMAx1	upper	29	1
	lower	280	0
3A m CD4 GFP Ki67 aSMAx2	upper	30	0
	lower	205	3
2A CD4 BSL Ki67 aSMA 20x1	upper	16	0
	lower	310	3
2A CD4 BSL Ki67 aSMA 20x2	upper	20	0
	lower	296	2
Sum	upper	95	1	1.05263
	lower	1091	8	0.733272
		PDGFR+	Ki67+ PDGFR+	% Fbs
3B m CD4 GFP Ki67 aSMAx1	upper	9	0
	lower	158	4
3B m CD4 GFP Ki67 aSMAx2	upper	11	0
	lower	277	6
2B CD4 BSL Ki67 aSMA 20x1	upper	11	0
	lower	156	1
2B CD4 BSL Ki67 aSMA 20x2	upper	24	0
	lower	430	7
Sum	upper	55	0	0
	lower	1021	18	1.76298
		PDGFR+	Ki67+ PDGFR+	% Fbs
4AM UV aSMA Ki67 20x1	upper	10	1
	lower	283	11
4AM UV aSMA Ki67 20x2	upper	20	1
	lower	252	7
UV 4A GFP aSMA Ki67 20x2	upper	35	0
	lower	195	2
UV 4A GFP aSMA Ki67 20x1	upper	30	2
	lower	313	11
	total upper	95	4	4.21053
	total lower	1043	31	2.9722
		PDGFR+	Ki67+ PDGFR+	% Fbs
UV 4B GFP aSMA Ki67 20x1	upper	122	4
	lower	544	8
UV 4B GFP aSMA Ki67 20x2	upper	71	5
	lower	505	14
Sum	upper	193	9	4.66321
	lower	1049	22	2.09724
		PDGFR+	Ki67+ PDGFR+	% Fbs
4A m UV GFP Ki67 aSMAx1	upper	44	0
	lower	260	5
4A m UV GFP Ki67 aSMAx1	upper	58	0
	lower	394	14
3A UV BSL Ki67 aSMA 20x1	upper	14	3
	lower	164	4
3A UV BSL Ki67 aSMA 20x2	upper	25	3
	lower	255	8
Sum	upper	141	6	4.25532
	lower	1073	31	2.8891
		PDGFR+	Ki67+ PDGFR+	% Fbs
4B m UV GFP Ki67 aSMAx1	upper	47	0
	lower	205	1
4B m UV GFP Ki67 aSMAx2	upper	102	1
	lower	251	8
3B UV BSL Ki67 aSMA 20x1	upper	59	3
	lower	400	9
3B UV BSL Ki67 aSMA 20x2	upper	63	5
	lower	454	15
Sum	upper	271	9	3.32103
	lower	1310	33	2.51908
		PDGFR+	Ki67+ PDGFR+	% Fbs
5AM Control aSMA Ki67 20x1	upper	98	2
	lower	268	5
5AM Control aSMA Ki67 20x2	upper	113	0
	lower	326	4
5AM Control aSMA Ki67 20x3	upper	86	0
	lower	276	1
Control 5A GFP aSMA Ki67 20x1	upper	105	2
	lower	269	1
Control 5A GFP aSMA Ki67 20x2	upper	102	0
	lower	382	0
	total upper	504	4	0.793651
	total lower	1521	11	0.723208
		PDGFR+	Ki67+ PDGFR+	% Fbs
5BM Control aSMA Ki67 20x1	upper	87	2
	lower	262	3
5BM Control aSMA Ki67 20x2	upper	94	0
	lower	269	3
5BM Control aSMA Ki67 20x3	upper	88	0
	lower	239	3
Control 5B GFP aSMA Ki67 20x1	upper	94	2
	lower	346	0
Control 5B GFP aSMA Ki67 20x2	upper	89	0
	lower	330	0
	total upper	452	4	0.884956
	total lower	1446	9	0.622407
		PDGFR+	Ki67+ PDGFR+	% Fbs
5A m control GFP Ki67 aSMAx1	upper	128	2
	lower	318	2
5A m control GFP Ki67 aSMAx2	upper	134	3
	lower	257	2
4A Control BSL Ki67 aSMA 20x1	upper	75	2
	lower	255	3
4A Control BSL Ki67 aSMA 20x2	upper	89	1
	lower	254	4
Sum	upper	426	8	1.87793
	lower	1084	11	1.01476
		PDGFR+	Ki67+ PDGFR+	% Fbs
5B m control GFP Ki67 aSMAx1	upper	110	0
	lower	307	3
5B m control GFP Ki67 aSMAx2	upper	99	3
	lower	222	4
4B Control BSL Ki67 aSMA 20x1	upper	47	1
	lower	144	3
4B Control BSL Ki67 aSMA 20x2	upper	45	2
	lower	213	3
Sum	upper	301	6	1.99336
	lower	886	13	1.46727
