# Supplementary material for: Role of distinct fibroblast lineages and immune cells in dermal repair following UV radiation-induced tissue damage
Source: eLife journal article supplement (doi:10.7554/elife.71052), 2021-12-23
Supplement: supp [file elife-71052-supp-v1.zip › elife_poa_e71052_Figure_7_source_data_1.xlsx]

## Sheet: Figure 7A
	Summary of PGE-2 measurments after acUVB
Plate map					Mass (mg) of the sample lysed in 1ml (1/120 dilution in experiment)
Standard (pg/ml)	IgUV	Control
					Ig UV A	78.6
1000	A	A	A		Ig UV B	25.4
500	A	A	A		Ig UV C	54.8
250	B	B	B		Ig UV D	51.3
125	B	B	B
62.5	C	C	C		Ig A	40.4
31.25	C	C	C		Ig B	49.3
15.625	D (male)	D	D		Ig C	48
7.8125	D (male)	D	D		Ig D	55.1
MEASUREMENT 2: Absorbance Quick Read 2021.09.16 11:23:17					Fitted standard curve 15.625-500pg/ml
0.238729	0.262607	0.491295
0.237073	0.256773	0.487453
0.280504	0.392427	0.504863			Log concentration = -2.82655 x absorbance + 3.22141
0.34936	0.380419	0.524922
0.486131	0.318277	0.476556
0.630625	0.318377	0.495471
0.722809	0.296509	0.334109
0.826931	0.308229	0.326832
	Replicate 1	Replicate 2	Average		Concentration (pg/ml)		Normalised to 1g of tissue (ng/g)
Ig UV A	0.262607	0.256773	0.25969		307.173		468.966
Ig UV B	0.392427	0.380419	0.386423		134.637		636.082
Ig UV C	0.318277	0.318377	0.318327		209.721		459.244
Ig UV D	0.296509	0.308229	0.302369		232.674		544.267
Ig A	0.491295	0.487453	0.489374		68.8922		204.63
Ig B	0.504863	0.524922	0.514893		58.3499		142.028
Ig C	0.476556	0.495471	0.486014		70.4155		176.039
Ig D	0.334109	0.326832	0.33047		193.785		422.035

## Sheet: Figure 7B
	Summary of PGE-2 measurments after immune cell depletion
Plate map					Mass (mg) of the sample lysed in 1ml (1/120 dilution in experiment)
Standard (pg/ml)	PBS	CD4	CD8
					PBS A	25.4
1000	A	A	A		PBS B	34.6
500	A	A	A		PBS C	23.1
250	B	B	B		PBS D	56.8
125	B	B	B
62.5	C	C	C		CD4 A	40.9
31.25	C	C	C		CD4 B	24.4
15.625	D	D	D		CD4 C	13
7.8125	D	D	D		CD4 D	12.7
					CD8 A	33.9
					CD8 B	24.8
					CD8 C	31.4
					CD8 D	19.2
MEASUREMENT 1: Absorbance Quick Read 2021.08.20 11:52:40					Fitted standard curve 15.625-500pg/ml
0.233117	0.422068	0.297315	0.359538
0.267921	0.430251	0.306341	0.355282
0.363504	0.319942	0.494093	0.39685		Log concentration = -1.67699 x absorbance +3.02657
0.507299	0.305662	0.488448	0.380777
0.678268	0.504533	0.539106	0.303151
0.916277	0.524431	0.560346	0.31073
1.13143	0.371435	0.648257	0.465456
1.19887	0.374943	0.612854	0.458376
	Replicate 1	Replicate 2	Average		Concentration (pg/ml)		Normalised to 1g of tissue (ng/g)
PBS A	0.422068	0.430251	0.426159		205.071		968.841
PBS B	0.319942	0.305662	0.312802		317.69		1101.82
PBS C	0.504533	0.524431	0.514482		145.81		757.456
PBS D	0.371435	0.374943	0.373189		251.615		531.581
CD4 A	0.297315	0.306341	0.301828		331.442		972.446
CD4 B	0.494093	0.488448	0.491271		159.483		784.342
CD4 C	0.539106	0.560346	0.549726		127.258		1174.69
CD4 D	0.648257	0.612854	0.630555		93.1397		880.06
CD8 A	0.359538	0.355282	0.35741		267.422		946.627
CD8 B	0.39685	0.380777	0.388813		236.883		1146.21
CD8 C	0.303151	0.31073	0.30694		324.963		1241.9
CD8 D	0.465456	0.458376	0.461916		178.625		1116.41

## Sheet: Figure 7C
	Summary of COX-2 positive Fibroblasts (%)after acUVB
	Upper dermis								Lower dermis
Control	1.17647	9.7561	3.84615	7.31707	1.51515	0.990099	1.47059	2.22222	0.558659	0.4329	0.259067	1.05634	0.242718	0.743494	0	0.974026
1 day	34.4262	46.4968	47.482	17.7419	43.8462	17.6471			8.89328	25.812	7.46812	6.52921	30.5556	13.5189
4 days	2.85714	7.47331	4.46429						0.623701	1.01911	1.54143
8 days	8.62069	2.82486							1.16009	0.983607
14 days	0.980392	2.23881	1.11732	1.4218					1.10236	1.5	0.681431	1.14286
							GFP S:3, 100
	Control						COX2: S3, 60
			PDGFR	Cox2 positive	% Fb Cox-2+
	Control 1	upper	85	1	1.17647
		lower	358	2	0.558659
	Control 2	upper	82	8	9.7561
		lower	231	1	0.4329
	Control 3	upper	130	5	3.84615
		lower	386	1	0.259067
	Control 4	upper	82	6	7.31707
		lower	284	3	1.05634
	Control 5	upper	132	2	1.51515
		lower	412	1	0.242718
	Control 6	upper	101	1	0.990099
		lower	269	2	0.743494
	Control 7	upper	68	1	1.47059
		lower	287	0	0
	Control 8	upper	90	2	2.22222
		lower	308	3	0.974026
	UVB PI 1 day
			PDGFR	Cox2 positive	% Fb Cox-2+
	acUV PI1day 1	upper	61	21	34.4262
		lower	506	45	8.89328
	acUV PI1day 2	upper	157	73	46.4968
		lower	585	151	25.812
	acUV PI1day 3	upper	139	66	47.482
		lower	549	41	7.46812
	acUV PI1day 4	upper	124	22	17.7419
		lower	291	19	6.52921
	acUV PI1day 5	upper	130	57	43.8462
		lower	324	99	30.5556
	acUV PI1day 6	upper	68	12	17.6471
		lower	503	68	13.5189
		lower	585	151	25.812
	acUV PI1day 3	upper	139	66	47.482
		lower	549	41	7.46812
	acUV PI1day 4	upper	124	22	17.7419
		lower	291	19	6.52921
	acUV PI1day 5	upper	130	57	43.8462
		lower	324	99	30.5556
	acUV PI1day 6	upper	68	12	17.6471
		lower	503	68	13.5189
	UVB PI 4 day
			PDGFR	Cox2 positive
	aUV 4dpi 1a	upper	83	1	1.20482
		lower	249	1	0.401606
	aUV 4dpi 1b	upper	92	4	4.34783
		lower	232	2	0.862069
	Sum	upper	175	5	2.85714
		lower	481	3	0.623701
	aUV 4dpi 2a	upper	152	11	7.23684
		lower	464	4	0.862069
	aUV 4dpi 2b	upper	129	10	7.75194
		lower	321	4	1.24611
	Sum	upper	281	21	7.47331
		lower	785	8	1.01911
	aUV 4dpi 3a	upper	99	4	4.0404
		lower	252	4	1.5873
	aUV 4dpi 3b	upper	125	6	4.8
		lower	267	4	1.49813
	Sum	upper	224	10	4.46429
		lower	519	8	1.54143
	UVB PI 8 day
	aUV 8dpi 1a	upper	88	10	11.3636
		lower	226	2	0.884956
	aUV 8dpi 1b	upper	86	5	5.81395
		lower	205	3	1.46341
	Sum	upper	174	15	8.62069
		lower	431	5	1.16009
	aUV 8dpi 2a	upper	85	2	2.35294
		lower	285	2	0.701754
	aUV 8dpi 2b	upper	92	3	3.26087
		lower	325	4	1.23077
	Sum	upper	177	5	2.82486
		lower	610	6	0.983607
	UVB PI 14 day
	aUV 14dpi 1a	upper	136	1	0.735294
		lower	315	4	1.26984
	aUV 14dpi 1b	upper	68	1	1.47059
		lower	320	3	0.9375
	Sum	upper	204	2	0.980392
		lower	635	7	1.10236
	aUV 14dpi 2a	upper	74	1	1.35135
		lower	200	4	2
	aUV 14dpi 2b	upper	60	2	3.33333
		lower	200	2	1
	Sum	upper	134	3	2.23881
		lower	400	6	1.5
	aUV 14dpi A BSU 1	upper	69	0	0
		lower	235	0	0
	aUV 14dpi A BSU 2	upper	110	2	1.81818
		lower	352	4	1.13636
	Sum	upper	179	2	1.11732
		lower	587	4	0.681431
	aUV 14dpi B BSU 1	upper	118	0	0
		lower	333	3	0.900901
	aUV 14dpi B BSU 2	upper	93	3	3.22581
		lower	192	3	1.5625
	Sum	upper	211	3	1.4218
		lower	525	6	1.14286

## Sheet: Figure 7E&J
		Summary of Fbs and total dermal cells (DAPI+) per area (mm2) adter COX- inhibition and acUVB
		Summary FB density
																						Summary DAPI+ cells density
		Upper dermis								Lower dermis												Upper dermis								Lower dermis
	Control	1211.53	1462.2	1555.3	1276.9					1410.06	1409.01	1874.43	1473.88								Control	2802.32	2848.77	3206.67	2563.51					3252.74	3663.42	3912.34	2976.65
	UV AC	782.476	64.4704	581.823	327.757	312.756	406.418			1497.26	774.556	1211.21	1132.88	904.425	894.214						UV AC	3082.35	1861.9	2313.68	1966.54	1593.85	1820.3			4285.64	4394.82	2906.74	2486.98	1905.54	3147.96
	UV Cox	927.971	626.334	935.117	533.706	653.635	926.212	848.243		800.756	1057.75	1323.36	723.147	812.58	768.869	1078.48					UV Cox	3164	2729.25	2651.3	1943.65	2205.82	1971.6	2279.14		2366.07	3967.61	3911.77	1762.14	2425.17	1712.97	2814.41
PDGFR H2B cells		SD: 3, 100, filter 20
DAPI		SD: 2, 200, filter 20
Ki67		SD:3, 80, filter 50
		Cox-2 inhibition Fb density and total dermal cells (DAPI+)
	Sample		area	PDGFR+	DAPI	PDGFRper area in mm2	DAPI per area in mm2
	Control AC 30 6b Ki67 aSMA PI1d BSL 20x1	upper	41788	52	127	1244.38	3039.15
		lower	128359	166	425	1293.25	3311.03
	Control AC 30 6b Ki67 aSMA PI1d BSL 20x2	upper	56248	76	144	1351.16	2560.09
		lower	117812	178	436	1510.88	3700.81
	Control AC 30 6b Ki67 aSMA PI1d BSU 20x1	upper	40331	45	106	1115.77	2628.25
		lower	81100	124	227	1528.98	2799.01
	Control AC 30 6b Ki67 aSMA PI1d BSU 20x2	upper	51476	57	155	1107.31	3011.11
		lower	109591	148	333	1350.48	3038.57
Combined	Sum	upper	189843	230	532	1211.53	2802.32
		lower	436862	616	1421	1410.06	3252.74
	Sample		area	PDGFR+	DAPI	PDGFRper area in mm2	DAPI per area in mm2
	Control AC 30 6c Ki67 aSMA PI1d BSL 20x1	upper	51596	82	156	1589.27	3023.49
		lower	168175	271	593	1611.42	3526.09
	Control AC 30 6c Ki67 aSMA PI1d BSL 20x2	upper	43683	71	153	1625.35	3502.51
		lower	151744	187	663	1232.34	4369.2
	Control AC 30 6c Ki67 aSMA PI1d BSU 20x1	upper	63386	79	143	1246.33	2256.02
		lower	180433	247	577	1368.93	3197.86
Combined	Sum	upper	158665	232	452	1462.2	2848.77
		lower	500352	705	1833	1409.01	3663.42
	Sample		area	PDGFR+	DAPI	PDGFRper area in mm2	DAPI per area in mm2
	Control AC 30 8g Ki67 aSMA PI1d BSL 20x1	upper	60606	95	193	1567.5	3184.5
		lower	143301	292	593	2037.67	4138.14
	Control AC 30 8g Ki67 aSMA PI1d BSL 20x2	upper	52414	63	135	1201.97	2575.65
		lower	160085	295	593	1842.77	3704.28
	Control AC 30 8g Ki67 aSMA PI1d BSU 20x1	upper	51055	85	182	1664.87	3564.78
		lower	115470	202	445	1749.37	3853.81
	Control AC 30 8g Ki67 aSMA PI1d BSU 20x2	upper	54532	97	191	1778.77	3502.53
		lower	119441	220	475	1841.91	3976.86
Combined	Sum	upper	218607	340	701	1555.3	3206.67
		lower	538297	1009	2106	1874.43	3912.34
	Sample		area	PDGFR+	DAPI	PDGFRper area in mm2	DAPI per area in mm2
	Control AC 36 5f Ki67 aSMA PI1d BSL 20x1	upper	47721	51	114	1068.71	2388.89
		lower	140876	203	349	1440.98	2477.36
	Control AC 36 5f Ki67 aSMA PI1d BSL 20x2	upper	60412	95	194	1572.54	3211.28
		lower	124341	179	383	1439.59	3080.24
	Control AC 36 5f Ki67 aSMA PI1d BSU 20x1	upper	52184	72	146	1379.73	2797.79
		lower	111866	152	324	1358.77	2896.32
	Control AC 36 5f Ki67 aSMA PI1d BSU 20x2	upper	45651	45	74	985.74	1620.99
		lower	107354	180	386	1676.7	3595.58
	Sum	upper	97835	117	220	1195.89	2248.68
		lower	219220	332	710	1514.46	3238.76
Combined	Sum	upper	205968	263	528	1276.9	2563.51
		lower	484437	714	1442	1473.88	2976.65
	acUVV with Acetone
	Sample		area	PDGFR+	DAPI	PDGFRper area in mm2	DAPI per area in mm2
	UV AC 30 5e lY6G aSMA PI1d BSU 20x1	upper	51160	42	160	820.954	3127.44
		lower	180113	273	803	1515.72	4458.31
	UV AC 30 5e Ki67 aSMA PI1d BSU 20x1	upper	81703	49	188	599.733	2301.02
		lower	208944	329	803	1574.58	3843.14
	UV AC 30 5e Ki67 aSMA PI1d BSU 20x2	upper	98454	90	365	914.132	3707.32
		lower	256121	364	1159	1421.2	4525.2
	Sum	upper	231317	181	713	782.476	3082.35
		lower	645178	966	2765	1497.26	4285.64
	Sample		area	PDGFR+	DAPI	PDGFRper area in mm2	DAPI per area in mm2
	UV AC 30 6d Ki67 aSMA PI1d BSL 20x1	upper	95612	3	161	31.3768	1683.89
		lower	457370	333	2108	728.076	4608.96
	UV AC 30 6d Ki67 aSMA PI1d BSL 20x2	upper	96105	4	182	41.6211	1893.76
		lower	401543	264	1627	657.464	4051.87
	UV AC 30 6d Ki67 aSMA PI1d BSU 20x1	upper	99953	14	197	140.066	1970.93
		lower	442455	458	2122	1035.13	4795.97
	UV AC 30 6d Ki67 aSMA PI1d BSU 20x2	upper	96105	4	182	41.6211	1893.76
		lower	401544	264	1627	657.462	4051.86
Combined	Sum	upper	387775	25	722	64.4704	1861.9
		lower	1702912	1319	7484	774.556	4394.82
	Sample		area	PDGFR+	DAPI	PDGFRper area in mm2	DAPI per area in mm2
	UV AC 30 7f Ki67 aSMA PI1d BSL 20x1	upper	62763	18	146	286.793	2326.21
		lower	212182	226	549	1065.12	2587.4
	UV AC 30 7f Ki67 aSMA PI1d BSL 20x2	upper	43182	11	84	254.736	1945.25
		lower	218713	294	840	1344.23	3840.65
	UV AC 30 7f Ki67 aSMA PI1d BSL 20x3	upper	47859	9	154	188.052	3217.79
		lower	209787	256	625	1220.29	2979.21
	UV AC 30 7f Ki67 aSMA PI1d BSU 20x1	upper	91083	89	164	977.131	1800.56
		lower	290152	414	427	1426.84	1471.64
	UV AC 30 7f Ki67 aSMA PI1d BSU 20x2	upper	49017	44	132	897.648	2692.94
		lower	147006	242	692	1646.19	4707.29
Combined	Sum	upper	293904	171	680	581.823	2313.68
		lower	1077840	1432	3133	1328.58	2906.74
	Sample		area	PDGFR+	DAPI	PDGFRper area in mm2	DAPI per area in mm2
	UV AC 1 male Ki67 aSMA PI1d BSU 20x1	upper	95665	30	195	313.594	2038.36
		lower	327100	376	793	1149.5	2424.34
	UV AC 1 male Ki67 aSMA PI1d BSU 20x2	upper	53836	19	99	352.924	1838.92
		lower	233420	259	601	1109.59	2574.76
	Sum	upper	149501	49	294	327.757	1966.54
		lower	560520	635	1394	1132.88	2486.98
	Sample		area	PDGFR+	DAPI	PDGFRper area in mm2	DAPI per area in mm2
	UV AC 2 male Ki67 aSMA PI1d BSU 20x1	upper	87469	42	161	480.17	1840.65
		lower	351699	346	670	983.796	1905.04
	UV AC 2 male Ki67 aSMA PI1d BSU 20x2	upper	78795	10	104	126.912	1319.88
		lower	320551	262	611	817.343	1906.09
	Sum	upper	166264	52	265	312.756	1593.85
		lower	672250	608	1281	904.425	1905.54
	Sample		area	PDGFR+	DAPI	PDGFRper area in mm2	DAPI per area in mm2
	UV AC 3 male Ki67 aSMA PI1d BSU20x1	upper	70373	35	136	497.35	1932.56
		lower	320502	289	1007	901.71	3141.95
	UV AC 3 male Ki67 aSMA PI1d BSU 20x2	upper	44381	18	90	405.579	2027.89
		lower	122114	112	389	917.176	3185.55
	UV AC 3 male Ki67 aSMA PI1d BSU 20x3	upper	59943	18	92	300.285	1534.79
		lower	298817	262	938	876.791	3139.04
	Sum	upper	174697	71	318	406.418	1820.29
		lower	741433	663	2334	894.214	3147.96
	Sample		area	PDGFR+	DAPI	PDGFRper area in mm2	DAPI per area in mm2
	UVCox 30 6f Ki67 aSMA PI1d BSL 20x1	upper	71504	72	186	1006.94	2601.25
		lower	820270	329	1142	401.087	1392.22
	UVCox 30 6f Ki67 aSMA PI1d BSL 20x2	upper	76222	61	165	800.294	2164.73
		lower	335855	346	842	1030.21	2507.03
	UVCox 30 6f Ki67 aSMA PI1d BSU 20x1	upper	47969	39	229	813.025	4773.92
		lower	148088	186	693	1256.01	4679.65
	UVCox 30 6f Ki67 aSMA PI1d BSU 20x2	upper	48024	46	166	957.854	3456.61
		lower	136888	219	542	1599.85	3959.44
	UVCox 30 6f Ki67 aSMA PI1d BSU 20x3	upper	48316	53	178	1096.95	3684.08
		lower	133660	181	507	1354.18	3793.21
	Sum	upper	292035	271	924	927.971	3164
		lower	1574761	1261	3726	800.756	2366.07
	Sample		area	PDGFR+	DAPI	PDGFRper area in mm2	DAPI per area in mm2
	UVCox 30 6g Ki67 aSMA PI1d BSL 20x1	upper	95546	42	266	439.579	2784
		lower	344305	320	1251	929.409	3633.41
	UVCox 30 6g Ki67 aSMA PI1d BSL 20x2	upper	107689	81	385	752.166	3575.11
		lower	279948	290	1411	1035.91	5040.22
	UVCox 30 6g Ki67 aSMA PI1d BSL 20x3	upper	118856	57	281	479.572	2364.21
		lower	355072	336	1340	946.287	3773.88
	UVCox 30 6g Ki67 aSMA PI1d BSL 20x4	upper	112240	80	298	712.758	2655.02
		lower	234124	259	1198	1106.25	5116.95
	UVCox 30 6g Ki67 aSMA PI1d BSU 20x3	upper	93374	49	295	524.771	3159.34
		lower	198319	270	836	1361.44	4215.43
	UVCox 30 6g Ki67 aSMA PI1d BSU 20x4	upper	110932	91	218	820.322	1965.17
		lower	285224	320	697	1121.93	2443.69
	Sum	upper	638637	400	1743	626.334	2729.25
		lower	1696992	1795	6733	1057.75	3967.61
	Sample		area	PDGFR+	DAPI	PDGFRper area in mm2	DAPI per area in mm2
	UVCox 30 9c Ki67 aSMA PI1d BSL 20x1	upper	64674	83	204	1283.36	3154.28
		lower	208331	251	686	1204.81	3292.84
	UVCox 30 9c Ki67 aSMA PI1d BSL 20x2	upper	71431	98	251	1371.95	3513.88
		lower	180979	270	713	1491.89	3939.68
	UVCox 30 9c Ki67 aSMA PI1d BSL 20x3	upper	63226	77	188	1217.85	2973.46
		lower	155087	239	769	1541.07	4958.51
	UVCox 30 9c Ki67 aSMA PI1d BSU 20x2	upper	71676	54	161	753.39	2246.22
		lower	333611	402	1309	1205	3923.73
	UVCox 30 9c Ki67 aSMA PI1d BSU 20x3	upper	99000	34	177	343.434	1787.88
		lower	339344	449	1285	1323.14	3786.72
	Sum	upper	370007	346	981	935.117	2651.3
		lower	1217352	1611	4762	1323.36	3911.77
	Sample		area	PDGFR+	DAPI	PDGFRper area in mm2	DAPI per area in mm2
	UV Cox 1 male Ly6G H2AX PI1d BSL 20x1	upper	116027	71	342	611.927	2947.59
		lower	204434	143	390	699.492	1907.71
	UV Cox 1 male Ly6G H2AX PI1d BSL 20x2	upper	120832	57	374	471.729	3095.21
		lower	327035	300	822	917.333	2513.49
	UV Cox 1 male Ly6G H2AX PI1d BSU 20x1	upper	149121	78	362	523.065	2427.56
		lower	425460	249	1198	585.249	2815.78
	UV Cox 1 male Ly6G H2AX PI1d BSU 20x2	upper	143210	41	415	286.293	2897.84
		lower	387432	280	1044	722.707	2694.67
	Sum	upper	385980	206	1078	533.706	2792.89
		lower	956929	692	2410	723.147	2518.47
	UV Cox 2 male Ly6G H2AX PI1d BSL 20x1	upper	69650	55	177	789.663	2541.28
		lower	262676	246	641	936.515	2440.27
	UV Cox 2 male Ly6G H2AX PI1d BSL 20x2	upper	100192	71	218	708.639	2175.82
		lower	325429	216	875	663.739	2688.76
	UV Cox 2 male Ly6G H2AX PI1d BSU 20x1	upper	63500	33	169	519.685	2661.42
		lower	213746	130	535	608.199	2502.97
	UV Cox 2 male Ly6G H2AX PI1d BSU 20x2	upper	151736	67	363	441.556	2392.31
		lower	458788	271	1271	590.687	2770.34
	Sum	upper	385078	226	927	586.894	2407.3
		lower	1260639	863	3322	684.573	2635.17
	Sample		area	PDGFR+	DAPI	PDGFRper area in mm2	DAPI per area in mm2
	UV Cox 3 male Ly6G H2AX PI1d BSL 20x1	upper	56366	43	97	762.871	1720.9
		lower	216231	173	299	800.07	1382.78
	UV Cox 3 male Ly6G H2AX PI1d BSL 20x2	upper	110218	93	254	843.782	2304.52
		lower	373035	253	599	678.221	1605.75
	UV Cox 3 male Ly6G H2AX PI1d BSU 20x1	upper	94240	119	200	1262.73	2122.24
		lower	298237	264	476	885.202	1596.05
	UV Cox 3 male Ly6G H2AX PI1d BSU 20x1	upper	85749	66	165	769.688	1924.22
		lower	431317	324	760	751.188	1762.05
	Sum	upper	346573	321	716	926.212	2065.94
		lower	1318820	1014	2134	768.869	1618.11
	Sample		area	PDGFR+	DAPI	PDGFRper area in mm2	DAPI per area in mm2
	UV Cox 4 male Ly6G H2AX PI1d BSL 20x1	upper	87518	48	235	548.459	2685.16
		lower	268206	307	1038	1144.64	3870.16
	UV Cox 4 male Ly6G H2AX PI1d BSL 20x2	upper	131932	75	387	568.475	2933.33
		lower	391723	435	1302	1110.48	3323.78
	UV Cox 4 male Ki67 aSMA PI1d BSL 20x1	upper	45285	23	87	507.894	1921.17
		lower	172242	199	483	1155.35	2804.19
	UV Cox 4 male Ki67 aSMA PI1d BSL 20x2	upper	85622	96	233	1121.21	2721.26
		lower	356606	386	1116	1082.43	3129.5
	UV Cox 4 male Ki67 aSMA PI1d BSU 20x3	upper	98980	76	195	767.832	1970.09
		lower	476270	499	1134	1047.73	2381
	Sum	upper	229887	195	515	848.243	2240.23
		lower	1005118	1084	2733	1078.48	2719.08

## Sheet: Figure 7G&H
							Summary of yH2AX positive Fbs (%) and Ly6G positive dermal cells per area (mm2) after COX-2 inhibition and acUVB
						Summary yH2AX positive Fbs (%)						Summary Ly6G cells per area (mm2)
						Control	UV AC	UV Cox				Control	UV AC	UV Cox
					Mouse 1	7.47126	22.2672	16.5644			Mouse 1	60.481	430.941	65.8882
					Mouse 2	3.0581	24.4125	13.5952			Mouse 2	24.201	195.562	81.9956
					Mouse 3	4.85075	11.4929	15.0442			Mouse 3	10.5521	181.593	105.652
					Mouse 4	1.47493	13.6364	5.9322			Mouse 4	17.6844	343.61	178.82
					Mouse 5		23.764	13.0662			Mouse 5	61.0109	214.7	151.168
					Mouse 6			13.7011			Mouse 6	81.311	150.814	66.5128
					Mouse 7			5.35241			Mouse 7	63.6446	173.366	162.715
											Mouse 8		182.067	122.131
											Mouse 9		293.411
	control with Ly6G scale 4 40 and yH2AX scale 4 60
		Sample		area	PDGFR+	H2AX+ PDGFR+	Ly6+	H2AX positive Fb%	Ly6G per area in mm2
		Control AC 30 6b female Ly6G H2AX PI1d BSL 20x1	upper	40466	41	0	0	0	0
			lower	108341	133	13	9	9.77444	83.071
			Sum	148807	174	13	9	7.47126	60.481
		Sample		area	PDGFR+	H2AX+ PDGFR+	Ly6+	H2AX positive Fb%	Ly6G per area in mm2
		Control AC 30 6c female Ly6G H2AX PI1d BSL 20x1	upper	55378	75	1	0	1.33333	0
			lower	151225	252	9	5	3.57143	33.0633
			Sum	206603	327	10	5	3.0581	24.201
		Sample		area	PDGFR+	H2AX+ PDGFR+	Ly6+	H2AX positive Fb%	Ly6G per area in mm2
		Control AC 30 5 female Ly6G H2AX PI1d BSL 20x1	upper	67822	98	1	0	1.02041	0
			lower	121713	170	12	2	7.05882	16.4321
			Sum	189535	268	13	2	4.85075	10.5521
		Sample		area	PDGFR+	H2AX+ PDGFR+	Ly6+	H2AX positive Fb%	Ly6G per area in mm2
		Control AC 30 8g female Ly6G H2AX PI1d BSL 20x1	upper	47730	79	0	0	0	0
			lower	121911	260	5	3	1.92308	24.6081
			Sum	169641	339	5	3	1.47493	17.6844
		Sample		area			Ly6+		Ly6G per area in mm2
		Control 5A M GFP cCasp Ly6G 20x1	upper	80250			13		161.994
			lower	317507			16		50.3926
		Control 5A M GFP cCasp Ly6G 20x1	upper	92735			6		64.7005
			lower	373682			20		53.5214
			upper	172985			19		109.836
			lower	691189			36		52.0842
			Sum	864174			55		63.6446
		Sample		area			Ly6+		Ly6G per area in mm2
		Control 5B M GFP cCasp Ly6G 20x1	upper	72855			6		82.3554
			lower	345261			23		66.6163
		Control 5B M GFP cCasp Ly6G 20x2	upper	78459			7		89.2186
			lower	302825			29		95.7649
			upper	151314			13		85.9141
			lower	648086			52		80.2363
			Sum	799400			65		81.311
		Sample		area			Ly6+		Ly6G per area in mm2
		Control 5C F GFP cCasp Ly6G 20x1	upper	64737			4		61.7885
			lower	160671			7		43.5673
		Control 5C F GFP cCasp Ly6G 20x2	upper	75149			0		0
			lower	174768			18		102.994
			upper	139886			4		28.5947
			lower	335439			25		74.5292
			Sum	475325			29		61.0109
		Sample		area	PDGFR+	H2AX+ PDGFR+	Ly6+	H2AX positive Fb%	Ly6G per area in mm2
		UV AC 30 7f female Ly6G H2AX PI1d BSL 20x1	upper	51766	51	10	0	19.6078	0
			lower	126003	196	45	9	22.9592	71.4269
			Sum	177769	247	55	9	22.2672	50.6275
		Sample		area	PDGFR+	H2AX+ PDGFR+	Ly6+	H2AX positive Fb%	Ly6G per area in mm2
		UV AC 30 7c female Ly6G H2AX PI1d BSL 20x1	upper	47784	14	3	2	21.4286	41.855
			lower	180101	289	67	41	23.1834	227.65
		UV AC 30 7c female Ly6G H2AX PI1d BSL 20x1	upper	75324	62	5	6	8.06452	79.6559
			lower	212689	296	85	58	28.7162	272.699
		UV AC 30 7c female Ly6G H2AX PI1d BSL 20x1	upper	73294	22	4	22	18.1818	300.161
			lower	295190	441	113	192	25.6236	650.429
			upper	121078	36	7	24	19.4444	198.219
			lower	475291	730	180	233	24.6575	490.226
			Sum	596369	766	187	257	24.4125	430.941
		Sample		area	PDGFR+	H2AX+ PDGFR+	Ly6+	H2AX positive Fb%	Ly6G per area in mm2
		UV AC 30 7b female Ly6G H2AX PI1d BSL 20x1	upper	77431			1		12.9147
			lower	208923			55		263.255
			Sum	286354	0	0	56		195.562
		Sample		area	PDGFR+	H2AX+ PDGFR+	Ly6+	H2AX positive Fb%	Ly6G per area in mm2
		UV AC 30 5e female Ly6G H2AX PI1d BSL 20x1	upper	77431	42	1	0	2.38095	0
			lower	208923	279	23	52	8.24373	248.896
			Sum	286354	321	24	52	7.47664	181.593
		Sample		area	PDGFR+	H2AX+ PDGFR+	Ly6+	H2AX positive Fb%	Ly6G per area in mm2
		UV AC 1 male Ki67 aSMA PI1d BSU 20x2	upper	443163	301	51	83	16.9435	187.29
			lower	1638874	1682	120	231	7.13436	140.95
			Sum	2082037	1983	171	314	8.6233	150.814
		Sum	upper	487966	300	49	96	16.3333	196.735
		UV AC 2 male Ly6G H2AX PI1d BSU 20x1	lower	1808263	1546	145	397	9.37904	219.548
			Sum	2296229	1846	194	493	10.5092	214.7
		UV AC 3 male Ki67 aSMA PI1d BSZ 20x2	upper	380472	313	64	87	20.4473	228.663
			lower	1438452	1177	195	538	16.5675	374.013
			Sum	1818924	1490	259	625	17.3826	343.61
		Sample		area			Ly6+		Ly6G per area in mm2
		UV 4A M GFP cCasp Ly6G 20x1	upper	79607			17		213.549
			lower	236231			47		198.958
		UV 4A M GFP cCasp Ly6G 20x2	upper	69306			21		303.004
			lower	262411			105		400.136
			upper	148913			38		255.183
			lower	498642			152		304.828
			Sum	647555			190		293.411
		Sample		area			Ly6+		Ly6G per area in mm2
		UV 4C F GFP cCasp Ly6G 20x1	upper	97117			2		20.5937
			lower	277691			65		234.073
		UV 4C F GFP cCasp Ly6G 20x2	upper	95257			11		115.477
			lower	205511			45		218.966
			upper	192374			13		67.5767
			lower	483202			110		227.648
			Sum	675576			123		182.067
		Sample		area			Ly6+		Ly6G per area in mm2
		UV 4D F GFP cCasp Ly6G 20x1	upper	93420			15		160.565
			lower	301205			56		185.92
		UV 4D F GFP cCasp Ly6G 20x2	upper	89594			20		223.229
			lower	329089			50		151.935
			upper	183014			35		191.242
			lower	630294			106		168.175
			Sum	813308			141		173.366
		Sample		area			Ly6+		Ly6G per area in mm2
		UV Cox31 5e female Ly6G H2AX PI1d BSL 20x1	upper	66849			2		29.9182
			lower	145632			12		82.3995
			Sum	212481			14		65.8882
		Sample		area	PDGFR+	H2AX+ PDGFR+	Ly6+	H2AX positive Fb%	Ly6G per area in mm2
		UV Cox30 6g female Ly6G H2AX PI1d BSL 20x1	upper	99542	35	5	14	14.2857	140.644
			lower	327310	291	49	21	16.8385	64.1594
			Sum	426852	326	54	35	16.5644	81.9956
		Sample		area	PDGFR+	H2AX+ PDGFR+	Ly6+	H2AX positive Fb%	Ly6G per area in mm2
		UV Cox30 6f female Ly6G H2AX PI1d BSL 20x1	upper	68332	51	5	10	9.80392	146.344
			lower	291338	280	40	28	14.2857	96.1083
			Sum	359670	331	45	38	13.5952	105.652
		Sample		area	PDGFR+	H2AX+ PDGFR+	Ly6+	H2AX positive Fb%	Ly6G per area in mm2
		UV Cox30 4e female Ly6G H2AX PI1d BSL 20x1	upper	52083	54	5	2	9.25926	38.4002
			lower	156752	222	60	46	27.027	293.457
		UV Cox30 4e female Ly6G H2AX PI1d BSL 20x2	upper	83815	47	4	1	8.51064	11.931
			lower	188280	292	47	37	16.0959	196.516
			upper	135898	101	9	3	8.91089	22.0754
			lower	345032	514	107	83	20.8171	240.557
			Sum	480930	615	116	86	18.8618	178.82
		Sample		area	PDGFR+	H2AX+ PDGFR+	Ly6+	H2AX positive Fb%	Ly6G per area in mm2
		UV Cox 1 male Ly6G H2AX PI1d BSU 20x2	upper	569569	247	29	103	11.7409	180.838
			lower	1379163	991	76	135	7.66902	97.8855
			Sum	1948732	1238	105	238	8.48142	122.131
		Sample		area	PDGFR+	H2AX+ PDGFR+	Ly6+	H2AX positive Fb%	Ly6G per area in mm2
		UV Cox 2 male Ly6G H2AX PI1d BSU 20x2	upper	514356	248	38	80	15.3226	155.534
			lower	1550604	982	186	256	18.9409	165.097
			Sum	2064960	1230	224	336	18.2114	162.715
		Sample		area	PDGFR+	H2AX+ PDGFR+	Ly6+	H2AX positive Fb%	Ly6G per area in mm2
		UV Cox 3 male Ly6G H2AX PI1d BSU 20x1	upper	350031	321	60	35	18.6916	99.9911
			lower	1318820	1014	136	76	13.4122	57.6273
			Sum	1668851	1335	196	111	14.6816	66.5128
		Sample		area	PDGFR+	H2AX+ PDGFR+	Ly6+	H2AX positive Fb%	Ly6G per area in mm2
		UV Cox 4 male Ly6G H2AX PI1d BSU 20x1	upper	467274	344	17	43	4.94186	92.0231
			lower	1338663	1543	84	230	5.44394	171.813
			Sum	1805937	1887	101	273	5.35241	151.168

## Sheet: Figure 7I
		Summary of Ki67+ Fbs (%) after COX-2 inhibition and acUVB
			Upper dermis								Lower dermis
		Control	0.869565	0.862069	0.882353	0.380228					1.62338	1.56028	4.9554	1.2605
		UV AC	0.552486	0	2.92398	0	3.84615	0			1.24224	7.12661	4.9581	2.99213	3.28947	1.80995
		UV Cox	1.47602	1.5	1.7341	0	0	0.854701	1.97629		5.15464	2.78552	4.34513	2.3416	3.22862	1.73913	1.00354
PDGFR H2B cells		SD: 3, 100, filter 20
DAPI		SD: 2, 200, filter 20
Ki67		SD:3, 80, filter 50
		COX-2 inhibition and Ki67+ Fbs (%)
	Sample		PDGFR+	Ki67+ PDGFR+	Ki67 positive Fb%
	Control AC 30 6b Ki67 aSMA PI1d BSL 20x1	upper	52	0	0
		lower	166	3	1.80723
	Control AC 30 6b Ki67 aSMA PI1d BSL 20x2	upper	76	0	0
		lower	178	2	1.1236
	Control AC 30 6b Ki67 aSMA PI1d BSU 20x1	upper	45	1	2.22222
		lower	124	3	2.41935
	Control AC 30 6b Ki67 aSMA PI1d BSU 20x2	upper	57	1	1.75439
		lower	148	2	1.35135
Combined	Sum	upper	230	2	0.869565
		lower	616	10	1.62338
	Sample		PDGFR+	Ki67+ PDGFR+	Ki67 positive Fb%
	Control AC 30 6c Ki67 aSMA PI1d BSL 20x1	upper	82	1	1.21951
		lower	271	6	2.21402
	Control AC 30 6c Ki67 aSMA PI1d BSL 20x2	upper	71	1	1.40845
		lower	187	1	0.534759
	Control AC 30 6c Ki67 aSMA PI1d BSU 20x1	upper	79	0	0
		lower	247	4	1.61943
Combined	Sum	upper	232	2	0.862069
		lower	705	11	1.56028
	Sample		PDGFR+	Ki67+ PDGFR+	Ki67 positive Fb%
	Control AC 30 8g Ki67 aSMA PI1d BSL 20x1	upper	95	0	0
		lower	292	9	3.08219
	Control AC 30 8g Ki67 aSMA PI1d BSL 20x2	upper	63	0	0
		lower	295	26	8.81356
	Control AC 30 8g Ki67 aSMA PI1d BSU 20x1	upper	85	1	1.17647
		lower	202	3	1.48515
	Control AC 30 8g Ki67 aSMA PI1d BSU 20x2	upper	97	2	2.06186
		lower	220	12	5.45455
Combined	Sum	upper	340	3	0.882353
		lower	1009	50	4.9554
	Sample		PDGFR+	Ki67+ PDGFR+	Ki67 positive Fb%
	Control AC 36 5f Ki67 aSMA PI1d BSL 20x1	upper	51	1	1.96078
		lower	203	2	0.985222
	Control AC 36 5f Ki67 aSMA PI1d BSL 20x2	upper	95	0	0
		lower	179	1	0.558659
	Control AC 36 5f Ki67 aSMA PI1d BSU 20x1	upper	72	0	0
		lower	152	2	1.31579
	Control AC 36 5f Ki67 aSMA PI1d BSU 20x2	upper	45	0	0
		lower	180	4	2.22222
	Sum	upper	117	0	0
		lower	332	6	1.80723
Combined	Sum	upper	263	1	0.380228
		lower	714	9	1.2605
	acUVV with Acetone
	Sample		PDGFR+	Ki67+ PDGFR+	Ki67 positive Fb%
	UV AC 30 5e lY6G aSMA PI1d BSU 20x1	upper	42		0
		lower	273		0
	UV AC 30 5e Ki67 aSMA PI1d BSU 20x1	upper	49	0	0
		lower	329	5	1.51976
	UV AC 30 5e Ki67 aSMA PI1d BSU 20x2	upper	90	1	1.11111
		lower	364	7	1.92308
	Sum	upper	181	1	0.552486
		lower	966	12	1.24224
	Sample		PDGFR+	Ki67+ PDGFR+	Ki67 positive Fb%
	UV AC 30 6d Ki67 aSMA PI1d BSL 20x1	upper	3	0	0
		lower	333	32	9.60961
	UV AC 30 6d Ki67 aSMA PI1d BSL 20x2	upper	4	0	0
		lower	264	27	10.2273
	UV AC 30 6d Ki67 aSMA PI1d BSU 20x1	upper	14	0	0
		lower	458	10	2.18341
	UV AC 30 6d Ki67 aSMA PI1d BSU 20x2	upper	4	0	0
		lower	264	25	9.4697
Combined	Sum	upper	25	0	0
		lower	1319	94	7.12661
	Sample		PDGFR+	Ki67+ PDGFR+	Ki67 positive Fb%
	UV AC 30 7f Ki67 aSMA PI1d BSL 20x1	upper	18	0	0
		lower	226	12	5.30973
	UV AC 30 7f Ki67 aSMA PI1d BSL 20x2	upper	11	0	0
		lower	294	18	6.12245
	UV AC 30 7f Ki67 aSMA PI1d BSL 20x3	upper	9	2	22.2222
		lower	256	19	7.42188
	UV AC 30 7f Ki67 aSMA PI1d BSU 20x1	upper	89	1	1.1236
		lower	414	9	2.17391
	UV AC 30 7f Ki67 aSMA PI1d BSU 20x2	upper	44	2	4.54545
		lower	242	13	5.3719
Combined	Sum	upper	171	5	2.92398
		lower	1432	71	4.9581
	Sample		PDGFR+	Ki67+ PDGFR+	Ki67 positive Fb%
	UV AC 1 male Ki67 aSMA PI1d BSU 20x1	upper	30	0	0
		lower	376	4	1.06383
	UV AC 1 male Ki67 aSMA PI1d BSU 20x2	upper	19	0	0
		lower	259	15	5.79151
	Sum	upper	49	0	0
		lower	635	19	2.99213
	Sample		PDGFR+	Ki67+ PDGFR+	Ki67 positive Fb%
	UV AC 2 male Ki67 aSMA PI1d BSU 20x1	upper	42	2	4.7619
		lower	346	16	4.62428
	UV AC 2 male Ki67 aSMA PI1d BSU 20x2	upper	10	0	0
		lower	262	4	1.52672
	Sum	upper	52	2	3.84615
		lower	608	20	3.28947
	Sample		PDGFR+	Ki67+ PDGFR+	Ki67 positive Fb%
	UV AC 3 male Ki67 aSMA PI1d BSU20x1	upper	35	0	0
		lower	289	3	1.03806
	UV AC 3 male Ki67 aSMA PI1d BSU 20x2	upper	18	0	0
		lower	112	4	3.57143
	UV AC 3 male Ki67 aSMA PI1d BSU 20x3	upper	18	0	0
		lower	262	5	1.9084
	Sum	upper	71	0	0
		lower	663	12	1.80995
	Sample		PDGFR+	Ki67+ PDGFR+	Ki67 positive Fb%
	UVCox 30 6f Ki67 aSMA PI1d BSL 20x1	upper	72	0	0
		lower	329	19	5.77508
	UVCox 30 6f Ki67 aSMA PI1d BSL 20x2	upper	61	0	0
		lower	346	15	4.33526
	UVCox 30 6f Ki67 aSMA PI1d BSU 20x1	upper	39	1	2.5641
		lower	186	12	6.45161
	UVCox 30 6f Ki67 aSMA PI1d BSU 20x2	upper	46	0	0
		lower	219	6	2.73973
	UVCox 30 6f Ki67 aSMA PI1d BSU 20x3	upper	53	3	5.66038
		lower	181	13	7.18232
Combined	Sum	upper	271	4	1.47601
		lower	1261	65	5.15464
	Sample		PDGFR+	Ki67+ PDGFR+	Ki67 positive Fb%
	UVCox 30 6g Ki67 aSMA PI1d BSL 20x1	upper	42	1	2.38095
		lower	320	10	3.125
	UVCox 30 6g Ki67 aSMA PI1d BSL 20x2	upper	81	0	0
		lower	290	7	2.41379
	UVCox 30 6g Ki67 aSMA PI1d BSL 20x3	upper	57	0	0
		lower	336	10	2.97619
	UVCox 30 6g Ki67 aSMA PI1d BSL 20x4	upper	80	1	1.25
		lower	259	11	4.2471
	UVCox 30 6g Ki67 aSMA PI1d BSU 20x3	upper	49	4	8.16327
		lower	270	7	2.59259
	UVCox 30 6g Ki67 aSMA PI1d BSU 20x4	upper	91	0	0
		lower	320	5	1.5625
Combined	Sum	upper	400	6	1.5
		lower	1795	50	2.78552
	Sample		PDGFR+	Ki67+ PDGFR+	Ki67 positive Fb%
	UVCox 30 9c Ki67 aSMA PI1d BSL 20x1	upper	83	0	0
		lower	251	6	2.39044
	UVCox 30 9c Ki67 aSMA PI1d BSL 20x2	upper	98	3	3.06122
		lower	270	16	5.92593
	UVCox 30 9c Ki67 aSMA PI1d BSL 20x3	upper	77	0	0
		lower	239	15	6.27615
	UVCox 30 9c Ki67 aSMA PI1d BSU 20x2	upper	54	2	3.7037
		lower	402	12	2.98507
	UVCox 30 9c Ki67 aSMA PI1d BSU 20x3	upper	34	1	2.94118
		lower	449	21	4.67706
Combined	Sum	upper	346	6	1.7341
		lower	1611	70	4.34513
	Sample		PDGFR+	Ki67+ PDGFR+	Ki67 positive Fb%
	UV AC 1 male Ki67 aSMA PI1d BSU 20x1	upper	30	0	0
		lower	376	4	1.06383
	UV AC 1 male Ki67 aSMA PI1d BSU 20x2	upper	19	0	0
		lower	259	15	5.79151
	Sum	upper	49	0	0
		lower	635	19	2.99213
	Sample		PDGFR+	Ki67+ PDGFR+	Ki67 positive Fb%
	UV AC 2 male Ki67 aSMA PI1d BSU 20x1	upper	42	2	4.7619
		lower	346	16	4.62428
	UV AC 2 male Ki67 aSMA PI1d BSU 20x2	upper	10	0	0
		lower	262	4	1.52672
	Sum	upper	52	2	3.84615
		lower	608	20	3.28947
	Sample		PDGFR+	Ki67+ PDGFR+	Ki67 positive Fb%
	UV AC 3 male Ki67 aSMA PI1d BSU20x1	upper	35	0	0
		lower	289	3	1.03806
	UV AC 3 male Ki67 aSMA PI1d BSU 20x2	upper	18	0	0
		lower	112	4	3.57143
	UV AC 3 male Ki67 aSMA PI1d BSU 20x3	upper	18	0	0
		lower	262	5	1.9084
	Sum	upper	71	0	0
		lower	663	12	1.80995
	Sample		PDGFR+	Ki67+ PDGFR+	Ki67 positive Fb%
	UV Cox 1 male Ki67 aSMA PI1d BSL 20x1	upper	21	0	0
		lower	146	4	2.73973
	UV Cox 1 male Ki67 aSMA PI1d BSL 20x2	upper	25	0	0
		lower	231	2	0.865801
	UV Cox 1 male Ki67 aSMA PI1d BSU 20x1	upper	14	0	0
		lower	173	5	2.89017
	UV Cox 1 male Ki67 aSMA PI1d BSU 20x2	upper	6	0	0
		lower	176	6	3.40909
	Sum	upper	66	0	0
		lower	726	17	2.3416
	Sample		PDGFR+	Ki67+ PDGFR+	Ki67 positive Fb%
	UV Cox 2 male Ki67 aSMA PI1d BSL 20x1	upper	36	0	0
		lower	219	7	3.19635
	UV Cox 2 male Ki67 aSMA PI1d BSL 20x2	upper	50	0	0
		lower	290	20	6.89655
	UV Cox 2 male Ki67 aSMA PI1d BSU 20x1	upper	28	0	0
		lower	235	5	2.12766
	UV Cox 2 male Ki67 aSMA PI1d BSU 20x2	upper	36	0	0
		lower	185	4	2.16216
	UV Cox 2 male Ki67 aSMA PI1d BSU 20x3	upper	40	0	0
		lower	217	1	0.460829
	Sum	upper	190	0	0
		lower	1146	37	3.22862
	Sample		PDGFR+	Ki67+ PDGFR+	Ki67 positive Fb%
	UV Cox 3 male Ki67 aSMA PI1d BSL 20x1	upper	41	1	2.43902
		lower	287	5	1.74216
	UV Cox 3 male Ki67 aSMA PI1d BSL 20x2	upper	49	0	0
		lower	213	0	0
	UV Cox 3 male Ki67 aSMA PI1d BSU 20x1	upper	65	0	0
		lower	260	13	5
	UV Cox 3 male Ki67 aSMA PI1d BSU 20x2	upper	39	0	0
		lower	173	0	0
	UV Cox 3 male Ki67 aSMA PI1d BSU 20x2	upper	40	1	2.5
		lower	217	2	0.921659
	Sum	upper	234	2	0.854701
		lower	1150	20	1.73913
	Sample		PDGFR+	Ki67+ PDGFR+	Ki67 positive Fb%
	UV Cox 4 male Ki67 aSMA PI1d BSL 20x1	upper	23	0	0
		lower	199	0	0
	UV Cox 4 male Ki67 aSMA PI1d BSL 20x2	upper	96	4	4.16667
		lower	386	4	1.03627
	UV Cox 4 male Ki67 aSMA PI1d BSU 20x3	upper	76	1	1.31579
		lower	499	3	0.601202
	UV Cox 4 male Ki67 aSMA PI1d BSU 20x1	upper	26	0	0
		lower	316	6	1.89873
	UV Cox 4 male Ki67 aSMA PI1d BSU 20x2	upper	32	0	0
		lower	294	4	1.36054
	Sum	upper	253	5	1.97628
		lower	1694	17	1.00354

## Sheet: Figure 7K
		Summary of EP4 expression in mouse dermis after acUVB (MFI)
	Upper dermis								Lower dermis
Control	44	68	70.5	76.5					158	206.5	59	191				0.974026
1 day	259.5	174.5	83	433					713.5	424.5	456	272.5
4 days	168	102	197.5	158					98.5	116.5	135.5	82.5
8 days	186	223							157.5	139
14 days	156	180.5	200	196					149.5	148	312	201.5

## Sheet: Figure 7M
		Summary of EP4 expression in human epidermis and dermis after acUVB exposure
		EP4 (% area of epidermis)								EP4 (% area of dermis)
		0	24	96	168	240	336			0	24	96	168	240	336
	S101	0.287	10.6175	1.659	1.385	5.678	1.42967			0.1535	0.28775	0.1355	0.5135	0.224	0.666
	S102	1.581	5.256	24.288	14.0255	10.638	0.701667			0.061	0.379	1.81467	1.1795	0.956	0.192333
	S103	1.496	0.757	28.6387	4.653	1.18867	2.0595			0.012	0.042	0.615333	0.5195	0.362333	0.3855
	S104	0.241333	23.8547	10.025	2.654	0.169667	0.905333			0.022	0.424667	0.302333	0.317	0.0413333	0.259
	S105	1.417	12.6546	7.5814	10.151	14.869	3.19367			0.021	0.702	0.3898	0.122667	0.491667	0.363833
	S106	6.358	14.0727	30.6287	1.0775	0.001	1.098			0.0423333	0.221333	0.139667	0.031	0.003	0.1575
	S107	0.0923	2.15267	20.6897	25.625	10.4653	1.124			0.001	0.0723333	0.83	0.0173333	0.112333	0.042
	S108	0.207667	3.38733	0.665	4.81333	0.347	0.0586667			0.047	0.414	0.113333	0.0553333	0.0305	0.0196667
	S109	2.986	18.617	1.2345	0.5555	0.667667	0.719667			0.0516667	0.336667	0.0205	0.0605	0.344333	0.176333
	S110	3.9985	6.5915	10.6052	9.27875	0.7615	9.083			0.015	0.3285	0.0758	0.154	0.007	0.159
	S111	0.266	10.9357	39.9103	19.9667	1.225	0.177			0.167	0.482	2.744	2.96767	0.907
	S112	0.033	31.819		4.95133	8.28267	0.402667			0.024	1.9355		0.428333	0.334	0.288333
	S113	2.917	20.025	1.21481	1.5995	0.105	6.346			0.2525	0.603	0.139	0.18	0.095	1.12467
	missed study visit
	missing data due to sample quality
