# Supplementary material for: Role of distinct fibroblast lineages and immune cells in dermal repair following UV radiation-induced tissue damage
Source: eLife journal article supplement (doi:10.7554/elife.71052), 2021-12-23
Supplement: supp [file Figure S2A - P2 UV analysis.pdf › Figure 1- supplementary Souce file 2/Figure S2A - P2 UV analysis.pdf]

## P2 UV analysis

November 19, 2021

```
[1]: import os
import numpy as np
import pandas as pd
os.environ['PATH'] += os.pathsep + os.path.
↳expanduser('~\\AppData\\Roaming\\Python\\Lib\\site-packages\\tables')
import scanpy as sc
import loompy as lp
#from MulticoreTSNE import MulticoreTSNE as TSNE
import json
import base64
import zlib
from pyscenic.plotting import plot_binarization
#from pyscenic.export import add_scenic_metadata
#from pyscenic.cli.utils import load_signatures
import matplotlib as mpl
import matplotlib.pyplot as plt
#from scanpy.plotting._tools.scatterplots import plot_scatter
#import scanpy.pl.scatter as plot_scatter
import seaborn as sns
```

```
[2]: adata = sc.read( 'all_cells.loom', validate=False)
```

Variable names are not unique. To make them unique, call  
`.var\_names\_make\_unique`.

```
[3]: adata.var_names_make_unique()
```

```
[6]: adata = adata[adata.obs.age==2]
```

```
[8]: # Set up some scanpy preferences
sc.settings.verbosity = 3 # verbosity: errors (0), warnings (1), info (2),
↳hints (3)
#sc.logging.print_versions()
sc.set_figure_params(dpi=120, fontsize=10, dpi_save=600)

# Set maximum number of jobs for Scanpy. Stops the computer freezing up using
↳all the cores
sc.settings.njobs = 4
```

```
[9]: sc.pl.highest_expr_genes(adata, n_top=20, )
```

C:\Users\hhy696\OneDrive - Queen Mary, University of London\Bioinformatics\bioinf\lib\site-packages\scanpy\preprocessing\\_normalization.py:155: UserWarning: Reviewed a view of an AnnData. Making a copy.  
 view\_to\_actual(adata)  
 normalizing counts per cell  
 finished (0:00:00)

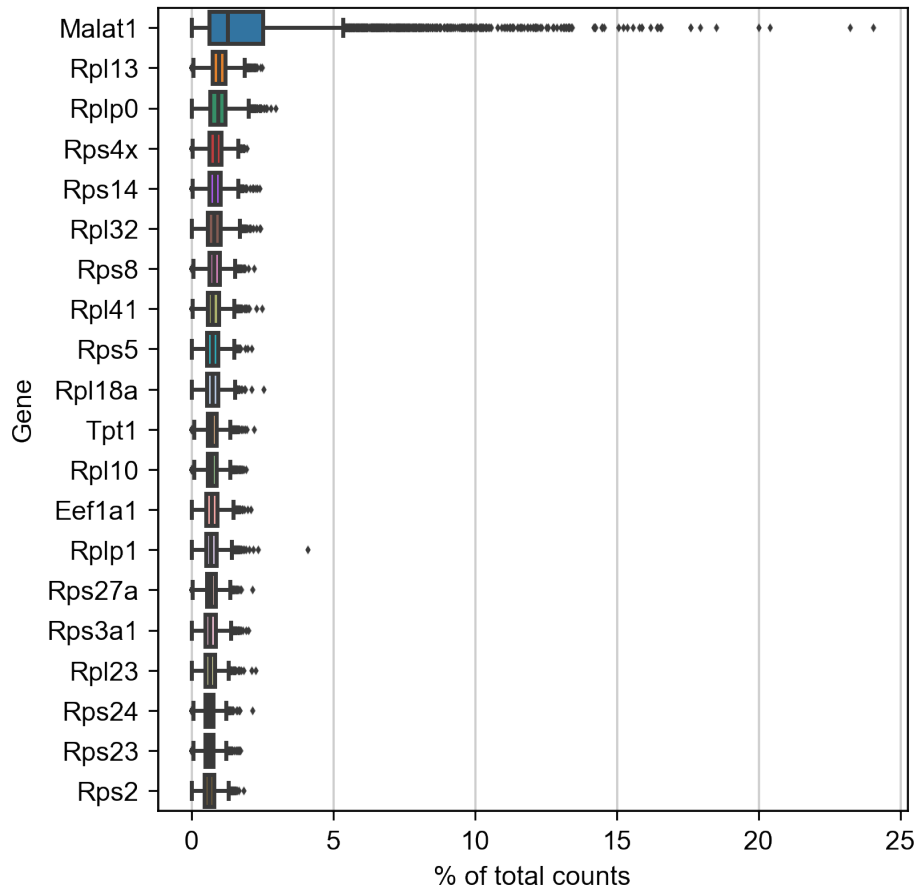

```
[10]: # filter cells with less than 200 genes expressed or genes expressed in less
      <than 3 cells
sc.pp.filter_cells(adata, min_genes=200)
sc.pp.filter_genes(adata, min_cells=3)
```

filtered out 43 cells that have less than 200 genes expressed  
 filtered out 13773 genes that are detected in less than 3 cells

```
[11]: sc.pp.calculate_qc_metrics(adata, percent_top=None, log1p=False, inplace=True)
```

```
[12]: sc.pl.violin(adata, ['n_genes_by_counts', 'total_counts'],
        jitter=0.4, multi_panel=True)
```

```
C:\Users\hhy696\OneDrive - Queen Mary, University of
London\Bioinformatics\bioinf\lib\site-packages\anndata\_core\anndata.py:1220:
FutureWarning: The `inplace` parameter in pandas.Categorical.reorder_categories
is deprecated and will be removed in a future version. Removing unused
categories will always return a new Categorical object.
    c.reorder_categories(natsorted(c.categories), inplace=True)
... storing 'CreationDate' as categorical
C:\Users\hhy696\OneDrive - Queen Mary, University of
London\Bioinformatics\bioinf\lib\site-packages\anndata\_core\anndata.py:1220:
FutureWarning: The `inplace` parameter in pandas.Categorical.reorder_categories
is deprecated and will be removed in a future version. Removing unused
categories will always return a new Categorical object.
    c.reorder_categories(natsorted(c.categories), inplace=True)
... storing 'last_modified' as categorical
C:\Users\hhy696\OneDrive - Queen Mary, University of
London\Bioinformatics\bioinf\lib\site-packages\anndata\_core\anndata.py:1220:
FutureWarning: The `inplace` parameter in pandas.Categorical.reorder_categories
is deprecated and will be removed in a future version. Removing unused
categories will always return a new Categorical object.
    c.reorder_categories(natsorted(c.categories), inplace=True)
... storing 'Chromosome' as categorical
C:\Users\hhy696\OneDrive - Queen Mary, University of
London\Bioinformatics\bioinf\lib\site-packages\anndata\_core\anndata.py:1220:
FutureWarning: The `inplace` parameter in pandas.Categorical.reorder_categories
is deprecated and will be removed in a future version. Removing unused
categories will always return a new Categorical object.
    c.reorder_categories(natsorted(c.categories), inplace=True)
... storing 'Strand' as categorical
```

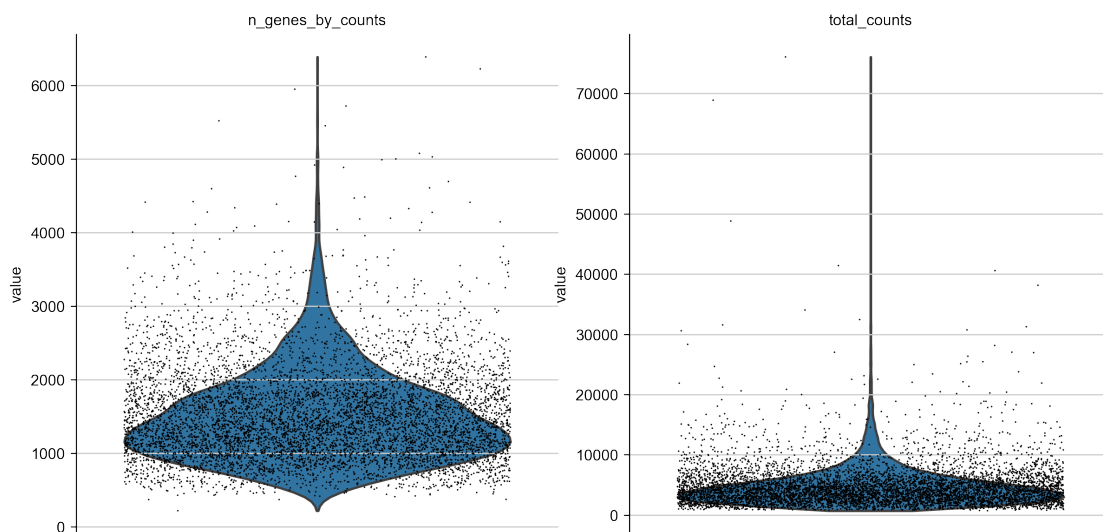

```
[13]: sc.pl.scatter(adata, x='total_counts', y='n_genes_by_counts')
```

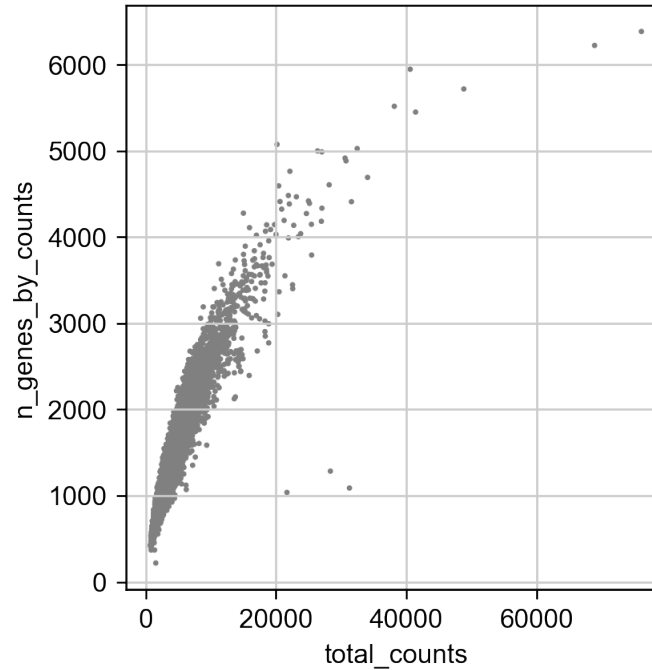

```
[14]: # Do some more preprocessing https://scanpy-tutorials.readthedocs.io/en/latest/  
      ↪ pbmc3k.html  
sc.pp.normalize_total(adata, target_sum=1e4)  
sc.pp.log1p(adata)  
sc.pp.highly_variable_genes(adata, min_mean=0.0125, max_mean=3, min_disp=0.5)  
sc.pl.highly_variable_genes(adata)
```

normalizing counts per cell

finished (0:00:00)

extracting highly variable genes

finished (0:00:00)

--> added

'highly\_variable', boolean vector (adata.var)

'means', float vector (adata.var)

'dispersions', float vector (adata.var)

'dispersions\_norm', float vector (adata.var)



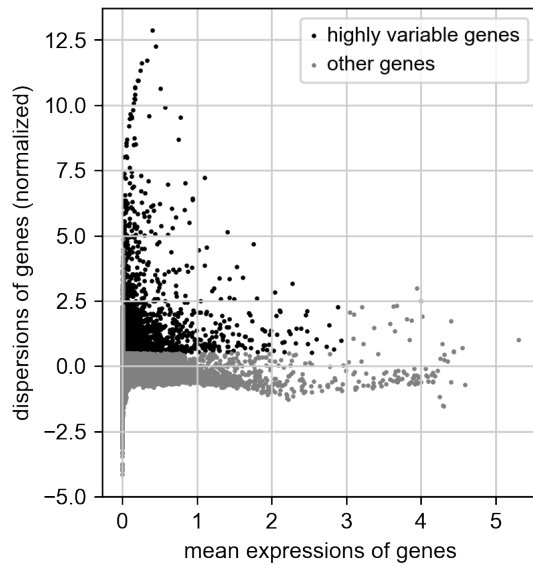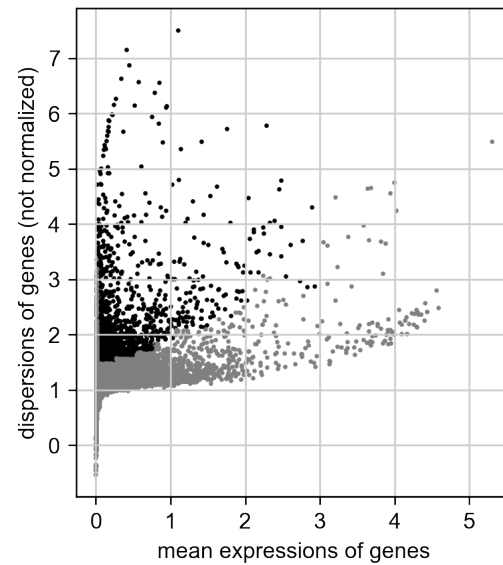

```
[15]: # save a copy of the raw data. This is sometimes used by other functions later
adata.raw = adata
```

```
[16]: # more preprocessing
adata = adata[:, adata.var.highly_variable]
sc.pp.regress_out(adata, ['total_counts'])
sc.pp.scale(adata, max_value=10)
```

```
regressing out ['total_counts']
  sparse input is densified and may lead to high memory use
  finished (0:00:15)
```

```
[17]: # run principal component analysis
sc.tl.pca(adata, n_comps=30)
```

```
computing PCA
  on highly variable genes
  with n_comps=30
  finished (0:00:01)
```

```
[19]: # plot the PCA, colouring by wounded and some fibroblast genes
sc.pl.pca(adata, color=['age', 'sample', 'Pdgfra', 'Twist2', 'Col1a2'], alpha=0.
→5)
```

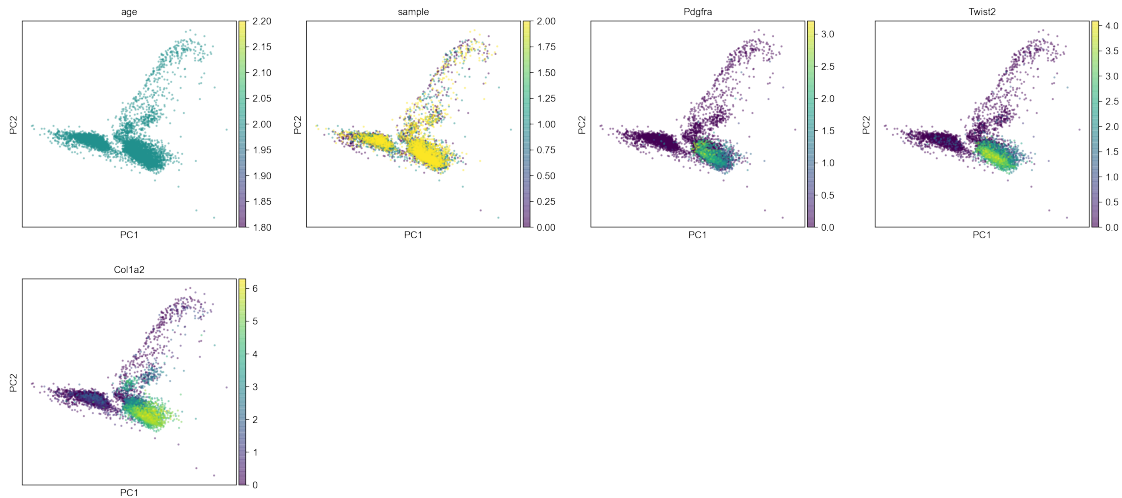

```
[20]: adata.obs['sample'] = adata.obs['sample'].astype('category')
```

```
[21]: # plot the contribution of each PC to the variance
sc.pl.pca_variance_ratio(adata, log=True)
```

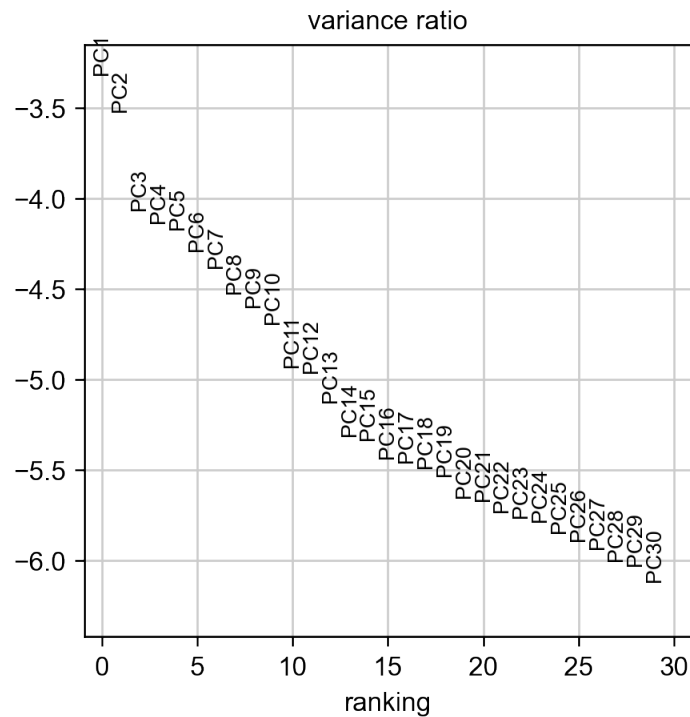

```
[22]: # write your filtered dataset
adata.write('P2 cells filtered.h5ad', compression='lzf')
```

```
[23]: # compute umap embedding
sc.pp.neighbors(adata, n_neighbors=10)
sc.tl.umap(adata)
sc.pl.umap(adata, color=['sample', 'age', 'Pdgfra', 'Twist2', 'Col1a2'])
```

```
computing neighbors
  using 'X_pca' with n_pcs = 30
  finished: added to `.uns['neighbors']`
  `.obsp['distances']`, distances for each pair of neighbors
  `.obsp['connectivities']`, weighted adjacency matrix (0:00:05)
computing UMAP
  finished: added
  'X_umap', UMAP coordinates (adata.obsm) (0:00:11)
```

```
-----
KeyError                                Traceback (most recent call last)
~\OneDrive - Queen Mary, University of London\Bioinformatics\bioinf\lib\site-packages\pandas\core\indexes\base.py in get_loc(self, key, method, tolerance)
    3360         try:
-> 3361             return self._engine.get_loc(casted_key)
    3362         except KeyError as err:

~\OneDrive - Queen Mary, University of London\Bioinformatics\bioinf\lib\site-packages\pandas\_libs\index.pyx in pandas._libs.index.IndexEngine.get_loc()

~\OneDrive - Queen Mary, University of London\Bioinformatics\bioinf\lib\site-packages\pandas\_libs\index.pyx in pandas._libs.index.IndexEngine.get_loc()

pandas\_libs\hashtable_class_helper.pxi in pandas._libs.hashtable.PyObjectHashTable.get_item()

pandas\_libs\hashtable_class_helper.pxi in pandas._libs.hashtable.PyObjectHashTable.get_item()

KeyError: 'wounded'
```

The above exception was the direct cause of the following exception:

```
KeyError                                Traceback (most recent call last)
~\AppData\Local\Temp\ipykernel_9132\1179834150.py in <module>
      2 sc.pp.neighbors(adata, n_neighbors=10)
      3 sc.tl.umap(adata)
```

```

----> 4 sc.pl.umap(adata, color=['sample', 'wounded', 'Pdgfra', 'Twist2',
    ↳ 'Col1a2'])

~\OneDrive - Queen Mary, University of
↳ London\Bioinformatics\bioinf\lib\site-packages\scanpy\plotting\_tools\scatter_plots.
↳ py in umap(adata, **kwargs)
    657     tl.umap
    658     """
--> 659     return embedding(adata, 'umap', **kwargs)
    660
    661

~\OneDrive - Queen Mary, University of
↳ London\Bioinformatics\bioinf\lib\site-packages\scanpy\plotting\_tools\scatter_plots.
↳ py in embedding(adata, basis, color, gene_symbols, use_raw, sort_order, edges,
↳ edges_width, edges_color, neighbors_key, arrows, arrows_kwds, groups,
↳ components, layer, projection, scale_factor, color_map, cmap, palette,
↳ na_color, na_in_legend, size, frameon, legend_fontsize, legend_fontweight,
↳ legend_loc, legend_fontoutline, vmax, vmin, vcenter, norm, add_outline,
↳ outline_width, outline_color, ncols, hspace, wspace, title, show, save, ax,
↳ return_fig, **kwargs)
    242         itertools.product(color, idx_components)
    243     ):
--> 244         color_source_vector = _get_color_source_vector(
    245             adata,
    246             value_to_plot,

~\OneDrive - Queen Mary, University of
↳ London\Bioinformatics\bioinf\lib\site-packages\scanpy\plotting\_tools\scatter_plots.
↳ py in _get_color_source_vector(adata, value_to_plot, use_raw, gene_symbols,
↳ layer, groups)
    1221     ] # TODO: Throw helpful error if this doesn't work
    1222     if use_raw and value_to_plot not in adata.obs.columns:
-> 1223         values = adata.raw.obs_vector(value_to_plot)
    1224     else:
    1225         values = adata.obs_vector(value_to_plot, layer=layer)

~\OneDrive - Queen Mary, University of
↳ London\Bioinformatics\bioinf\lib\site-packages\anndata\_core\raw.py in
↳ obs_vector(self, k)
    168     def obs_vector(self, k: str) -> np.ndarray:
    169         # TODO decorator to copy AnnData.obs_vector docstring
--> 170         idx = self._normalize_indices((slice(None), k))
    171         a = self.X[idx]
    172         if issparse(a):

~\OneDrive - Queen Mary, University of
↳ London\Bioinformatics\bioinf\lib\site-packages\anndata\_core\raw.py in
↳ _normalize_indices(self, packed_index)
    159         obs, var = unpack_index(packed_index)

```

```

160         obs = _normalize_index(obs, self._adata.obs_names)
--> 161         var = _normalize_index(var, self.var_names)
162         return obs, var
163
~\OneDrive - Queen Mary, University of London\Bioinformatics\bioinf\lib\site-packages\anndata\_core\index.py in _normalize_index(indexer, index)
73         return indexer
74     elif isinstance(indexer, str):
---> 75         return index.get_loc(indexer) # int
76     elif isinstance(indexer, (Sequence, np.ndarray, pd.Index, spmatrix,
np.matrix)):
77         if hasattr(indexer, "shape") and (

~\OneDrive - Queen Mary, University of London\Bioinformatics\bioinf\lib\site-packages\pandas\core\indexes\base.py in get_loc(self, key, method, tolerance)
3361         return self._engine.get_loc(casted_key)
3362     except KeyError as err:
-> 3363         raise KeyError(key) from err
3364
3365     if is_scalar(key) and isna(key) and not self.hasnans:

```

**KeyError:** 'wounded'

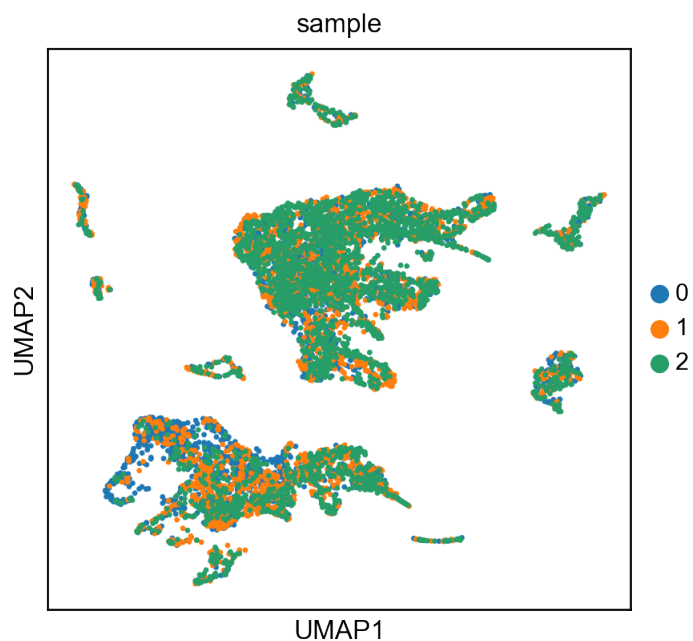

```
[24]: sc.pl.umap(adata, color=['sample', 'age', 'Pdgra', 'Twist2', 'Col1a2'])
```

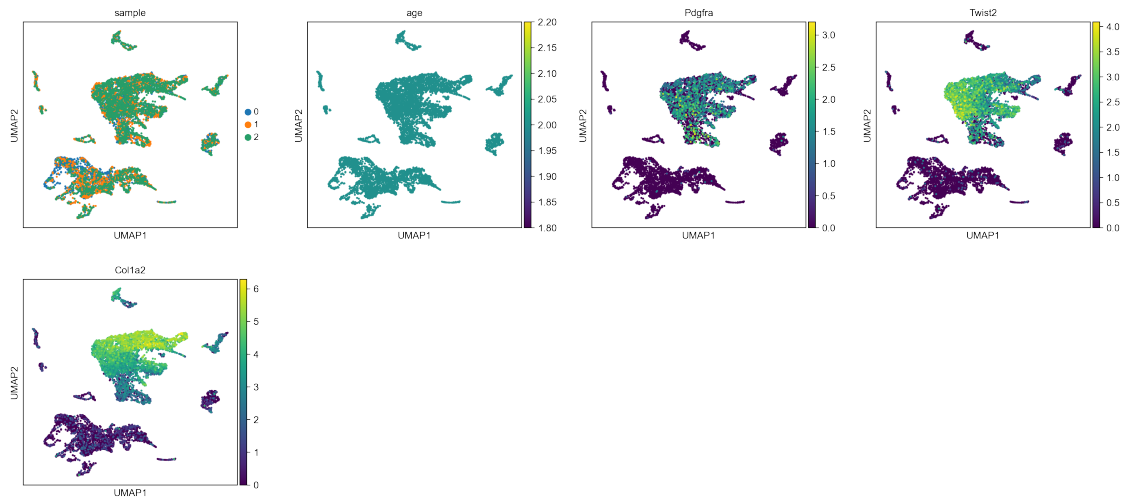

```
[27]: # cluster the data
sc.tl.leiden(adata, resolution=0.2)
sc.pl.umap(adata, color=['leiden'])
```

running Leiden clustering  
 finished: found 15 clusters and added  
 'leiden', the cluster labels (adata.obs, categorical) (0:00:00)

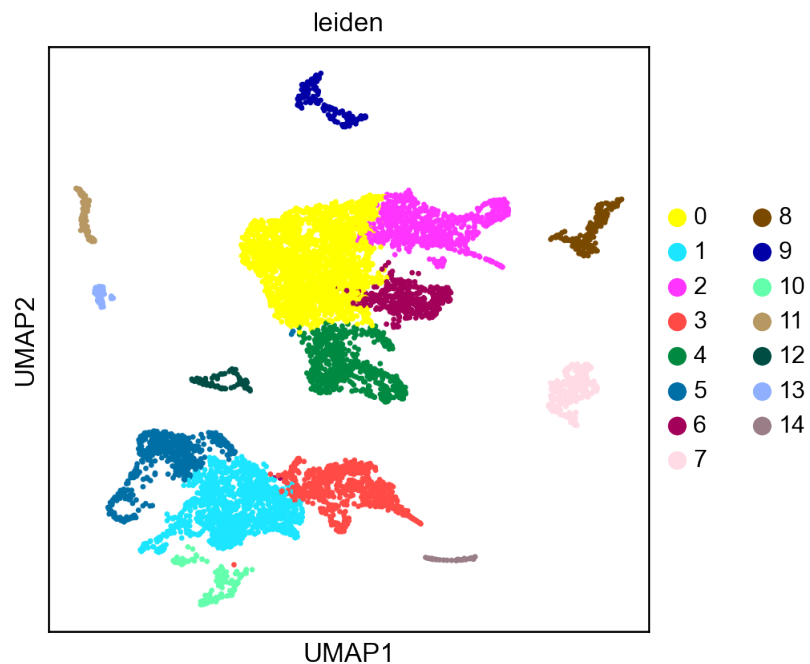

```
[29]: sc.pl.umap(adata, color=['En1', 'Pdgfra', 'Twist2']) # fibroblasts
sc.pl.umap(adata, color=['Col1a1', 'Vim', 'Thy1'])
sc.pl.umap(adata, color=['Krt10', 'Krt14']) # keratinocytes
sc.pl.umap(adata, color=['Pecam1', 'Ly6e', 'Ecsr']) # endothelial (Ly6e+) and
↳ lymphatic (Ly6e-)
sc.pl.umap(adata, color=['Laptm5', 'Cd53', 'Coro1a']) # immune cells
sc.pl.umap(adata, color=['Rgs5', 'Mylk']) # pericytes
sc.pl.umap(adata, color=['Dct', 'Ptgds']) # melanocytes
sc.pl.umap(adata, color=['Plp1', 'Dbi']) # Schwann cells
↳ (developing)
sc.pl.umap(adata, color=['Etv1', 'Fth1']) # Schwann cells
↳ (homeostasis)
```

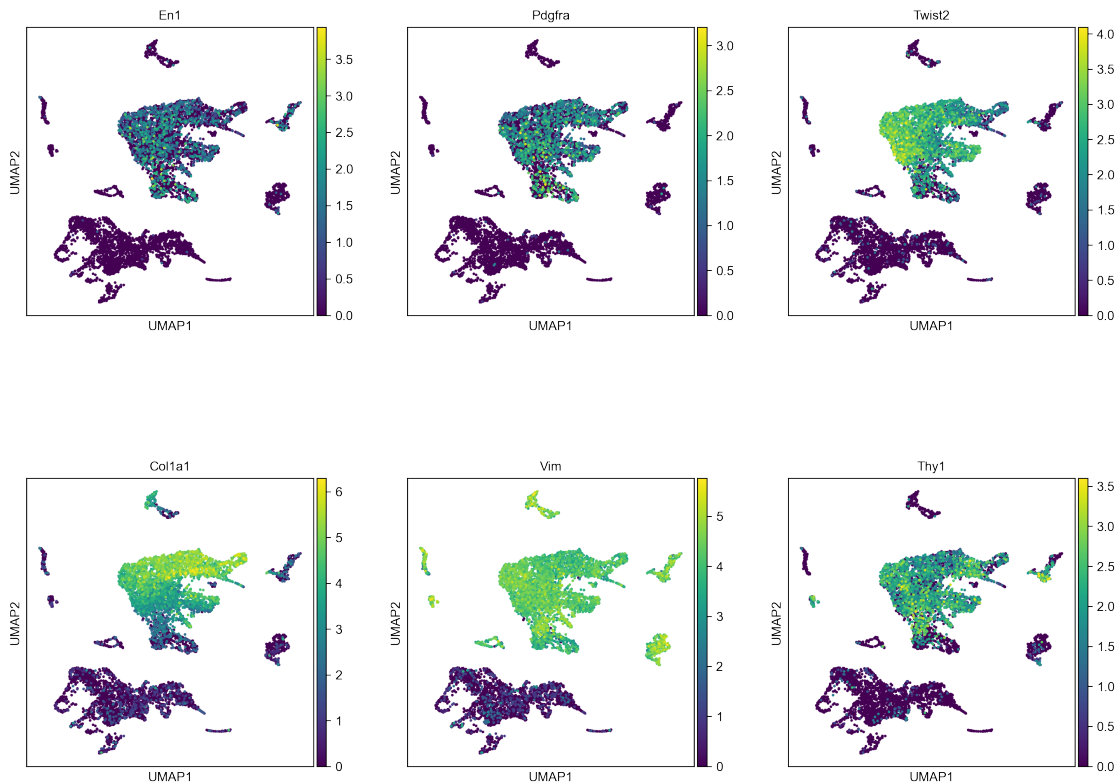

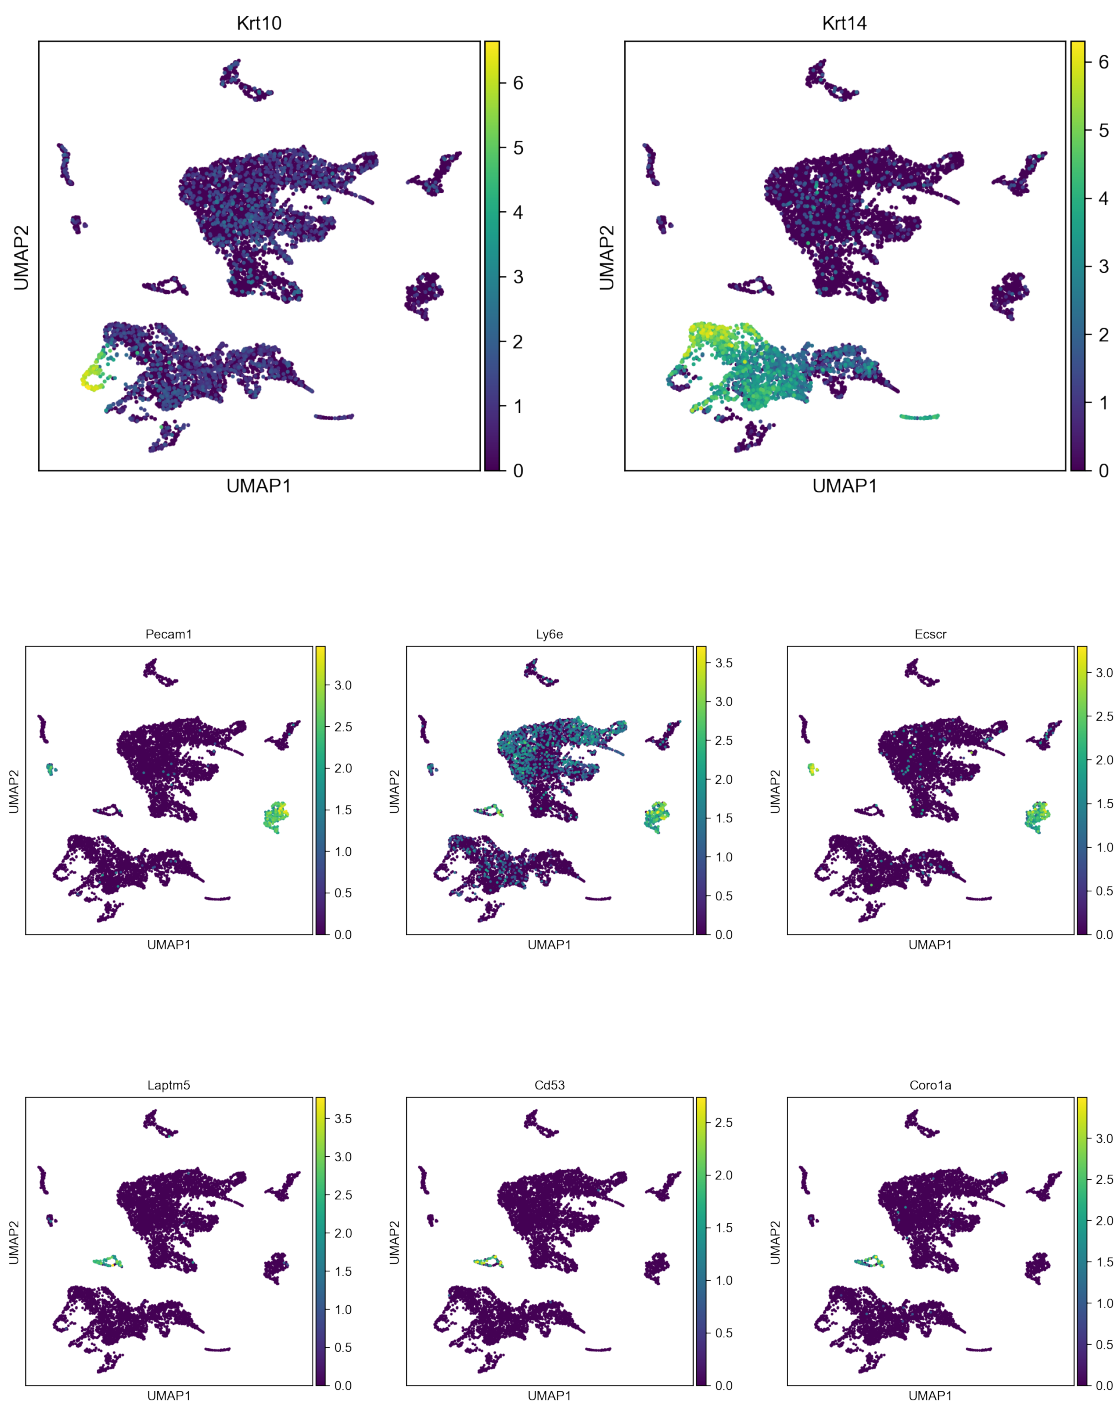



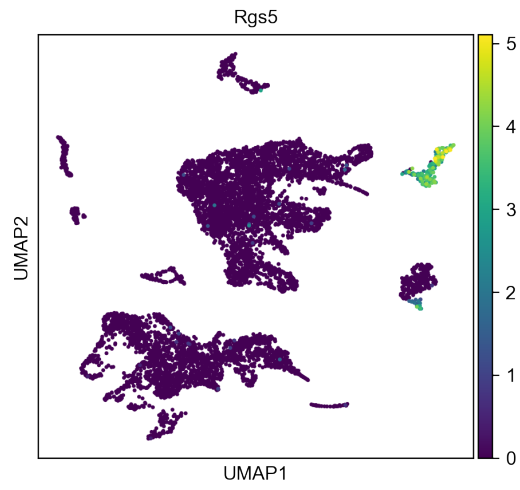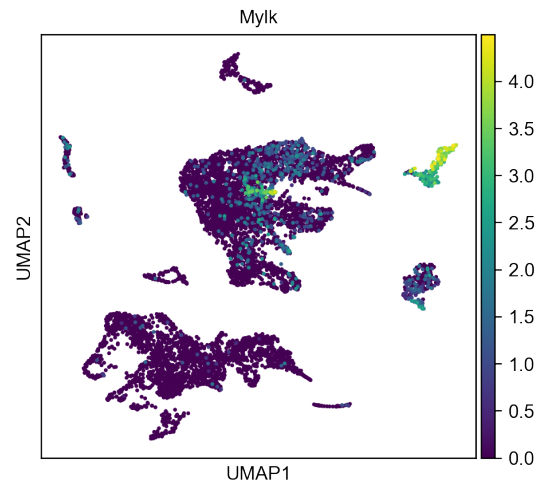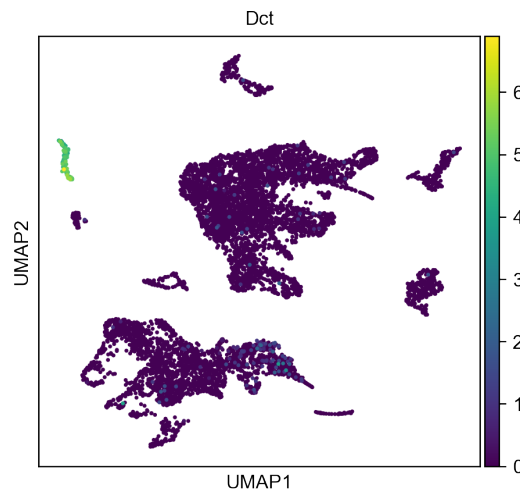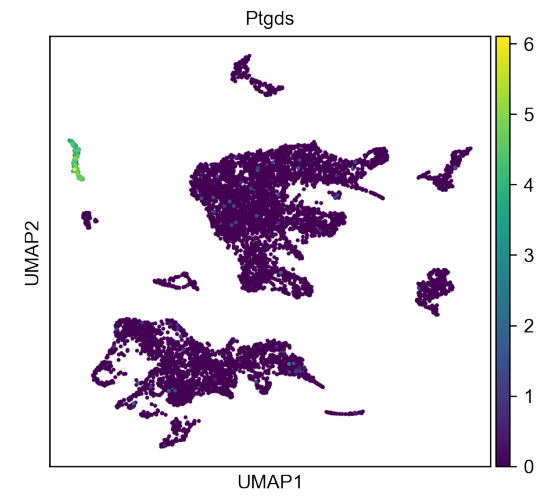

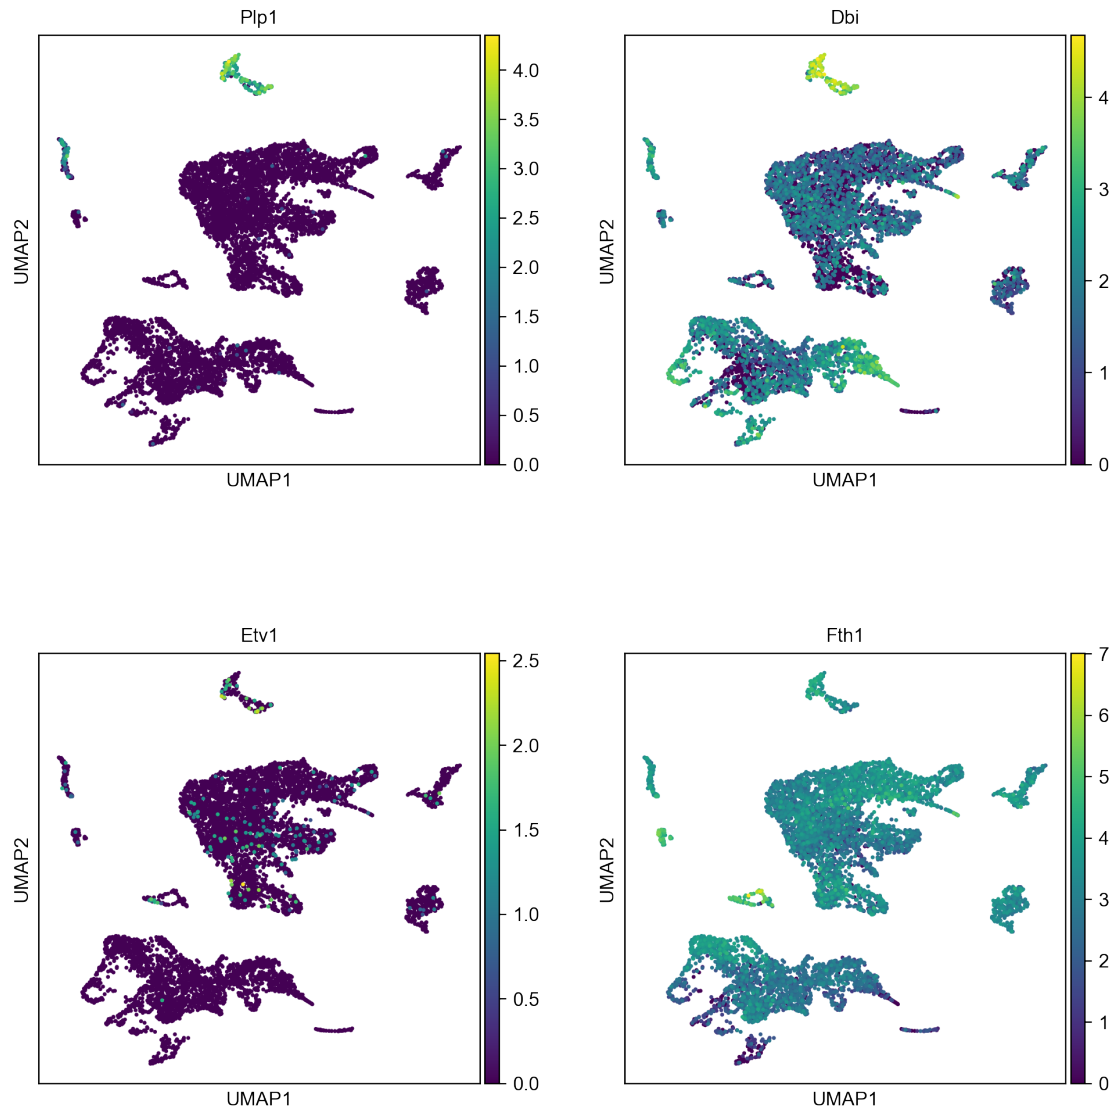

```
[30]: main_clusters = [
    → ['Fibroblast', 'Keratinocyte', 'Fibroblast', 'Keratinocyte', 'Fibroblast', 'Keratinocyte', 'Fibroblast',
      'Endothelial', 'SMC/
    → pericyte', 'Schwann', '', 'Melanocyte', 'Immune', 'Endothelial', '']
fibroblast_clusters = ['0', '2', '4', '6']
sc.pl.umap(adata[adata.obs.leiden.isin(fibroblast_clusters)], color='leiden')
```

Trying to set attribute `.uns` of view, copying.

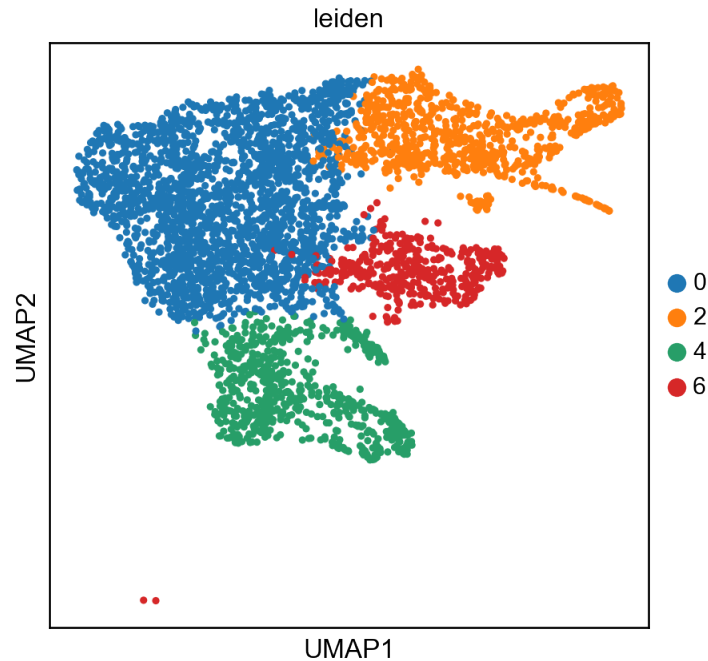

```
[31]: fbs = adata[adata.obs.leiden.isin(fibroblast_clusters)]
fbs
```

```
[31]: View of AnnData object with n_obs × n_vars = 3961 × 1874
      obs: 'Clusters', 'CreationDate', '_X', '_Y', 'age', 'last_modified',
      'sample', 'n_genes', 'n_genes_by_counts', 'total_counts', 'leiden'
      var: 'Accession', 'Chromosome', 'End', 'Start', 'Strand', 'n_cells',
      'n_cells_by_counts', 'mean_counts', 'pct_dropout_by_counts', 'total_counts',
      'highly_variable', 'means', 'dispersions', 'dispersions_norm', 'mean', 'std'
      uns: 'log1p', 'hvg', 'pca', 'neighbors', 'umap', 'sample_colors', 'leiden'
      obsm: 'X_pca', 'X_umap'
      varm: 'PCs'
      layers: 'matrix', 'ambiguous', 'spliced', 'unspliced'
      obsp: 'distances', 'connectivities'
```

```
[32]: fbs.write('P2 fibroblasts.h5ad', compression='lzf')
```

```
[34]: # delete all old attributes so we can recompute umap
del fbs.uns['neighbors']
del fbs.uns['pca']
del fbs.obsp['distances']
del fbs.obsp['connectivities']
del fbs.obsm['X_pca']
del fbs.obsm['X_umap']
del fbs.varm['PCs']
```

```
# compute umap embedding
sc.pp.neighbors(fbs, n_neighbors=10, n_pcs=40)
sc.tl.umap(fbs)
sc.pl.umap(fbs)
```

computing neighbors

WARNING: You're trying to run this on 1874 dimensions of `.X`, if you really want this, set `use\_rep='X'`.

Falling back to preprocessing with `sc.pp.pca` and default params.

computing PCA

with n\_comps=50

finished (0:00:01)

finished: added to `.uns['neighbors']`

`.obsp['distances']`, distances for each pair of neighbors

`.obsp['connectivities']`, weighted adjacency matrix (0:00:01)

computing UMAP

finished: added

'X\_umap', UMAP coordinates (adata.obsm) (0:00:08)

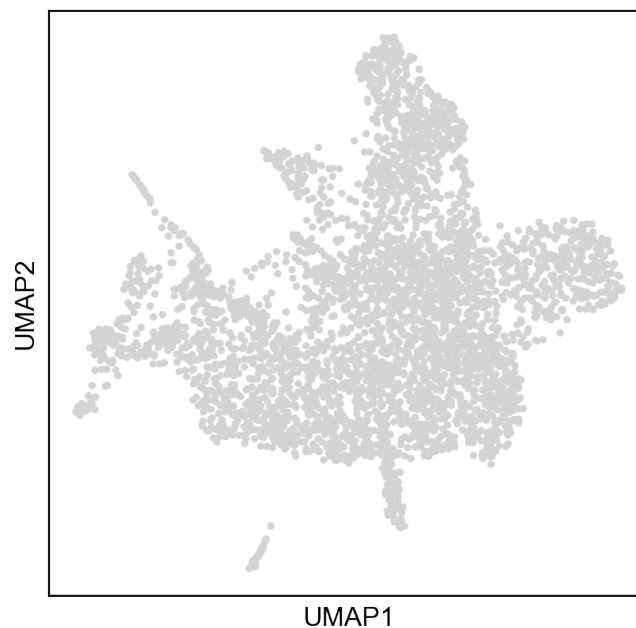

```
[45]: # cluster the data
sc.tl.leiden(fbs, resolution=0.5)
sc.pl.umap(fbs, color=['leiden'])
```

running Leiden clustering

finished: found 9 clusters and added

'leiden', the cluster labels (adata.obs, categorical) (0:00:00)

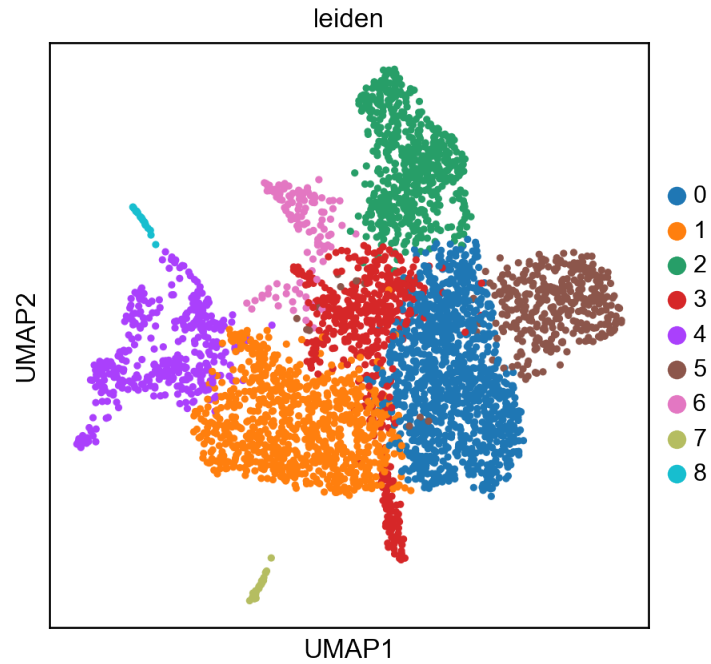

```
[48]: sc.pl.umap(fbs, color=['leiden', 'Dpp4', 'Dlk1', 'Ly6a', 'Dkk1', 'Acta2', 'Corin',  
    ↪ 'Acan', 'Gpx3'])
```

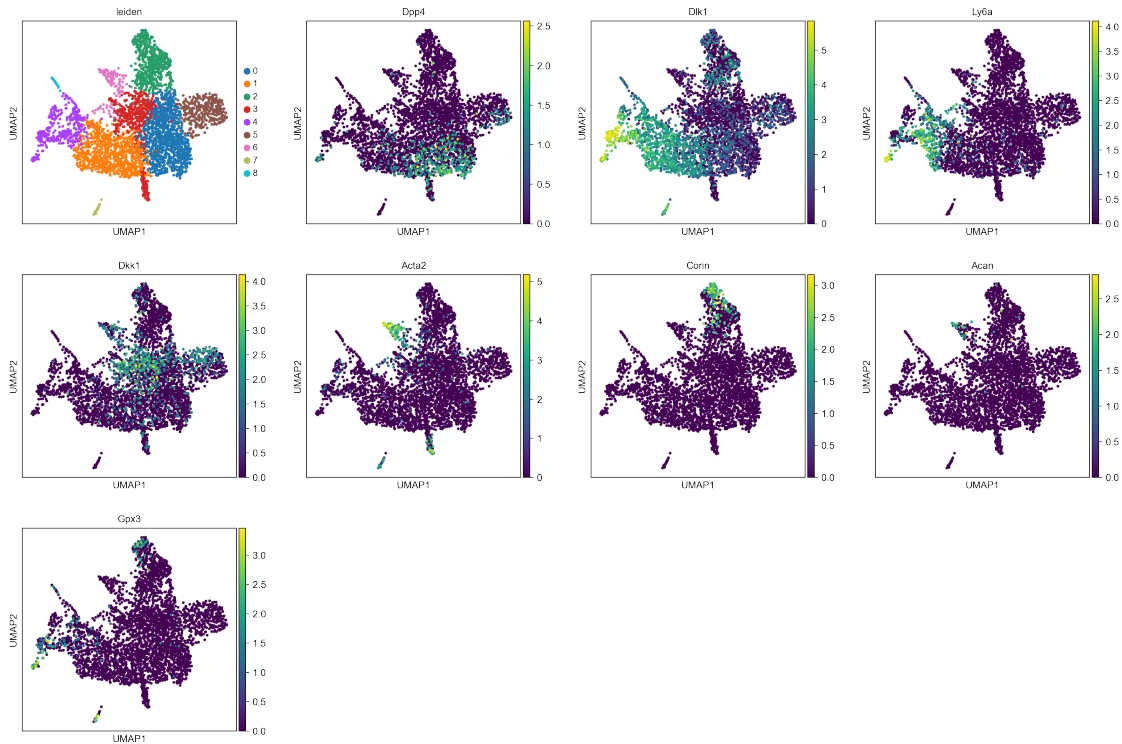

```
[51]: cluster_names = ['Dpp4 papillary', 'Reticular', 'DP', 'Dkk1_
↳ papillary', 'Preadipocyte', 'Dividin papillary',
      'APM', 'Pericyte', 'Adipocyte']
```

```
[125]: sc.tl.rank_genes_groups(fbs, 'leiden', method='t-test')
sc.pl.rank_genes_groups(fbs, n_genes=25, sharey=False)
```

ranking genes

```
finished: added to `uns['rank_genes_groups']`
'names', sorted np.recarray to be indexed by group ids
'scores', sorted np.recarray to be indexed by group ids
'logfoldchanges', sorted np.recarray to be indexed by group ids
'pvals', sorted np.recarray to be indexed by group ids
'pvals_adj', sorted np.recarray to be indexed by group ids (0:00:00)
```

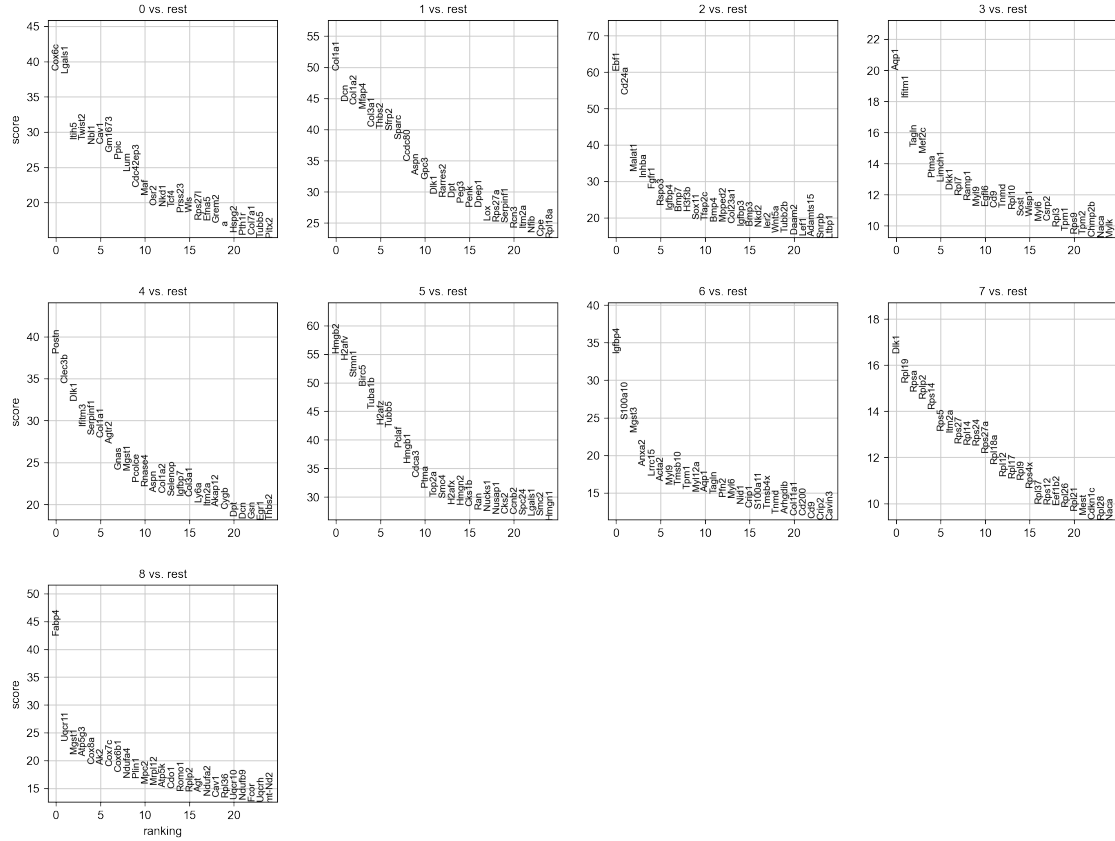

```
[56]: fbs.obs['cell_type'] = [cluster_names[int(x)] for x in fbs.obs.leiden]
```

```
[58]: sc.pl.umap(fbs, color=['cell_type'])
sc.pl.umap(fbs, color=['Dpp4', 'Dlk1', 'Ly6a', 'Dkk1', 'Acta2', 'Corin',
↪ 'Acan', 'Gpx3'])
```

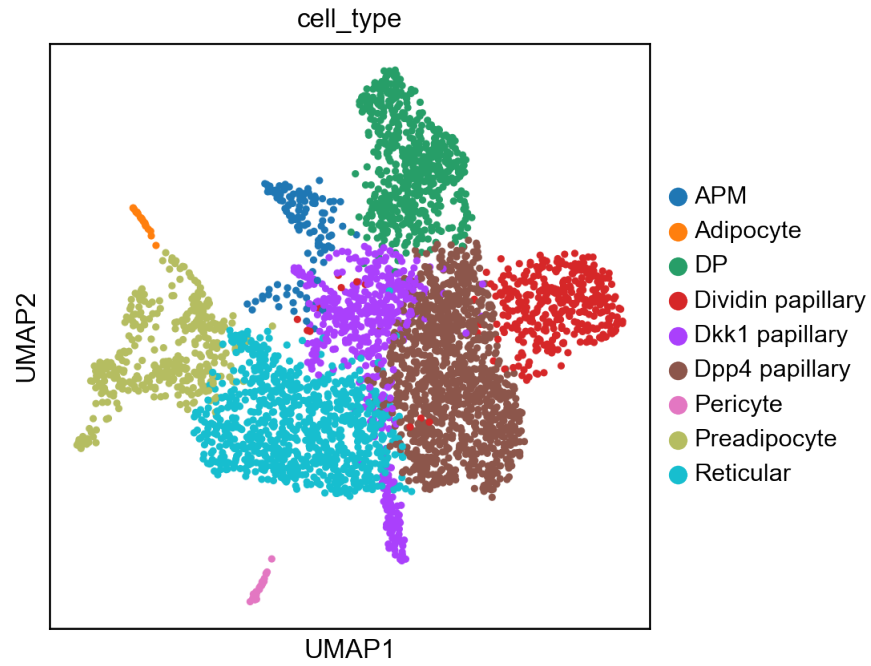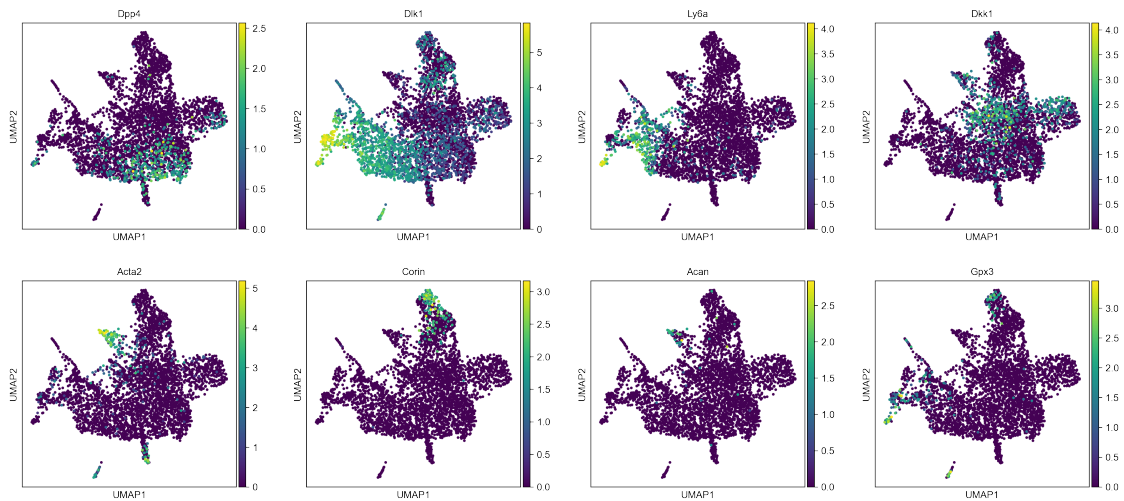

```
[60]: sc.pl.umap(fbs, color=['Dpp4', 'Dkk1', 'Ly6a', 'Dkk1', 'Stmn2', 'Corin', 'Acan', 'Gpx3'])
```



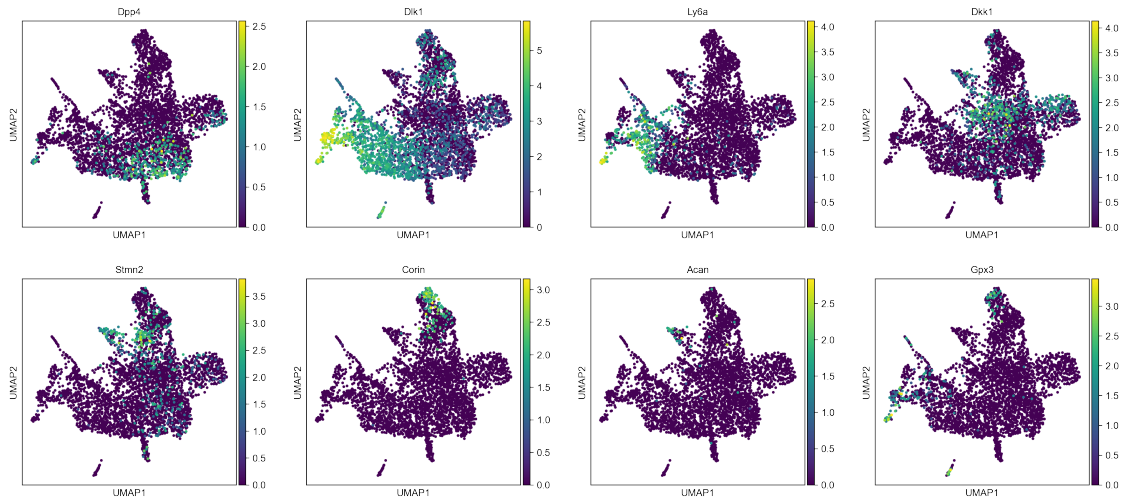

```
[71]: dpp4_pap = sc.queries.enrich(fbs, '0', gprofiler_kwargs={'all_results':True,
↳ 'sources':['GO:BP']})
```

```
[63]: fbs.write('P2 fibroblasts.h5ad', compression='lzf')
```

```
[73]: cluster_names
```

```
[73]: ['Dpp4 papillary',
      'Reticular',
      'DP',
      'Dkk1 papillary',
      'Preadipocyte',
      'Dividin papillary',
      'APM',
      'Pericyte',
      'Adipocyte']
```

```
[74]: reticular = sc.queries.enrich(fbs, '1', gprofiler_kwargs={'all_results':True,
↳ 'sources':['GO:BP']})
```

```
[75]: dkk1_pap = sc.queries.enrich(fbs, '3', gprofiler_kwargs={'all_results':True,
↳ 'sources':['GO:BP']})
```

```
[76]: preadipocyte = sc.queries.enrich(fbs, '4', gprofiler_kwargs={'all_results':
↳ True, 'sources':['GO:BP']})
```

```
[77]: div_pap = sc.queries.enrich(fbs, '5', gprofiler_kwargs={'all_results':True,
↳ 'sources':['GO:BP']})
```

```
[136]: dpp4_pap = sc.queries.enrich(fbs, '0', org='mmusculus', pval_cutoff=0.05,
    ↳ gprofiler_kwargs={'all_results':True})
    reticular = sc.queries.enrich(fbs, '1', org='mmusculus', pval_cutoff=0.05,
    ↳ gprofiler_kwargs={'all_results':True})
    dkk1_pap = sc.queries.enrich(fbs, '3', org='mmusculus', pval_cutoff=0.05,
    ↳ gprofiler_kwargs={'all_results':True})
    preadipocyte = sc.queries.enrich(fbs, '4', org='mmusculus', pval_cutoff=0.05,
    ↳ gprofiler_kwargs={'all_results':True})
    div_pap = sc.queries.enrich(fbs, '5', org='mmusculus', pval_cutoff=0.05,
    ↳ gprofiler_kwargs={'all_results':True})
```

```
[137]: dpp4_pap.to_csv('csv/dpp4.csv')
    reticular.to_csv('csv/reticular.csv')
    dkk1_pap.to_csv('csv/dkk1.csv')
    preadipocyte.to_csv('csv/preadipo.csv')
    div_pap.to_csv('csv/dividing pap.csv')
```

```
[79]: fbs.obs['group'] = fbs.obs.cell_type
```

```
[92]: fbs.obs.group[fbs.obs.leiden.isin(['0','3','5'])] = 'papillary'
```

```
-----
TypeError                                Traceback (most recent call last)
~\OneDrive - Queen Mary, University of
↳ London\Bioinformatics\bioinf\lib\site-packages\pandas\core\series.py in
↳ __setitem__(self, key, value)
    1061         try:
-> 1062             self._set_with_engine(key, value)
    1063         except (KeyError, ValueError):

~\OneDrive - Queen Mary, University of
↳ London\Bioinformatics\bioinf\lib\site-packages\pandas\core\series.py in
↳ _set_with_engine(self, key, value)
    1094         # fails with AttributeError for IntervalIndex
-> 1095         loc = self.index._engine.get_loc(key)
    1096         # error: Argument 1 to "validate_numeric_casting" has
↳ incompatible type

~\OneDrive - Queen Mary, University of
↳ London\Bioinformatics\bioinf\lib\site-packages\pandas\_libs\index.pyx in
↳ pandas._libs.index.IndexEngine.get_loc()

~\OneDrive - Queen Mary, University of
↳ London\Bioinformatics\bioinf\lib\site-packages\pandas\_libs\index.pyx in
↳ pandas._libs.index.IndexEngine.get_loc()

TypeError: 'CellID
P2P21CellCount03:AAGCCGCCACGGCCATx      False
```

```

P2P21CellCount03:AAACGGGTCCAGATCAx      True
P2P21CellCount03:AACTCTTAGCTACCTAx      True
P2P21CellCount03:AAAGATGCATCCTTGCx      False
P2P21CellCount03:AAAGTAGAGGCAGTCAx      True
...
P2P21CellCount05:TTCGAAGGTTCGTGATx      False
P2P21CellCount05:TTCTCAATCCTACAGAx      False
P2P21CellCount05:TTTGGTTTCCCTCTTTx      False
P2P21CellCount05:TTTGCGCTCAGAAATGx      True
P2P21CellCount05:TTGTAGGGTGAAATCAx      False
Name: leiden, Length: 3961, dtype: bool' is an invalid key

```

During handling of the above exception, another exception occurred:

```

ValueError                                Traceback (most recent call last)
~\AppData\Local\Temp\ipykernel_9132\640172466.py in <module>
----> 1 fbs.obs.group[fbs.obs.leiden.isin(['0','3','5'])] = 'papillary'

~\OneDrive - Queen Mary, University of L
↳ London\Bioinformatics\bioinf\lib\site-packages\pandas\core\series.py in
↳ __setitem__(self, key, value)
    1080         key = np.asarray(key, dtype=bool)
    1081         try:
-> 1082             self._where(~key, value, inplace=True)
    1083         except IndexError:
    1084             self.iloc[key] = value

~\OneDrive - Queen Mary, University of L
↳ London\Bioinformatics\bioinf\lib\site-packages\pandas\core\generic.py in
↳ _where(self, cond, other, inplace, axis, level, errors)
    8857
    8858         self._check_inplace_setting(other)
-> 8859         new_data = self._mgr.putmask(mask=cond, new=other,
↳ align=align)
    8860         result = self._constructor(new_data)
    8861         return self._update_inplace(result)

~\OneDrive - Queen Mary, University of L
↳ London\Bioinformatics\bioinf\lib\site-packages\pandas\core\internals\managers
↳ py in putmask(self, mask, new, align)
    363         new = extract_array(new, extract_numpy=True)
    364
--> 365         return self.apply(
    366             "putmask",
    367             align_keys=align_keys,

```

```

~\OneDrive - Queen Mary, University of
↳ London\Bioinformatics\bioinf\lib\site-packages\pandas\core\internals\managers
↳ py in apply(self, f, align_keys, ignore_failures, **kwargs)
    325         applied = b.apply(f, **kwargs)
    326     else:
--> 327         applied = getattr(b, f)(**kwargs)
    328     except (TypeError, NotImplementedError):
    329         if not ignore_failures:

~\OneDrive - Queen Mary, University of
↳ London\Bioinformatics\bioinf\lib\site-packages\pandas\core\internals\blocks.py
↳ in putmask(self, mask, new)
    1441         mask = mask.reshape(new_values.shape)
    1442
-> 1443         new_values[mask] = new
    1444         return [self.make_block(values=new_values)]
    1445

~\OneDrive - Queen Mary, University of
↳ London\Bioinformatics\bioinf\lib\site-packages\pandas\core\arrays\_mixins.py
↳ in __setitem__(self, key, value)
    180     def __setitem__(self, key, value):
    181         key = check_array_indexer(self, key)
--> 182         value = self._validate_setitem_value(value)
    183         self._ndarray[key] = value
    184

~\OneDrive - Queen Mary, University of
↳ London\Bioinformatics\bioinf\lib\site-packages\pandas\core\arrays\categorical
↳ py in _validate_setitem_value(self, value)
    2041         # something to np.nan
    2042         if len(to_add) and not isna(to_add).all():
-> 2043             raise ValueError(

    2044                 "Cannot setitem on a Categorical with a new "
    2045                 "category, set the categories first"

ValueError: Cannot setitem on a Categorical with a new category, set the
↳ categories first

```

```
[90]: group = fbs.obs.group
```

```
[100]: fbs.obs.group.cat.add_categories('papillary')
```

```
[100]: CellID
P2P21CellCount03:AAGCCGCCACGGCCATx      Reticular
P2P21CellCount03:AAACGGGTCCAGATCAx      Dpp4 papillary
P2P21CellCount03:AACTCTTAGCTACCTAx      Dkk1 papillary
```

```

P2P21CellCount03:AAAGATGCATCCTTGCx      APM
P2P21CellCount03:AAAGTAGAGGCAGTCAx      Dkk1 papillary
                                         ...
P2P21CellCount05:TTCGAAGGTTCGTGATx      Reticular
P2P21CellCount05:TTCTCAATCCTACAGAx      APM
P2P21CellCount05:TTTGGTTTCCCTCTTTx      Reticular
P2P21CellCount05:TTTGCGCTCAGAAATGx      Dividin papillary
P2P21CellCount05:TTGTAGGGTGAAATCAx      Reticular
Name: group, Length: 3961, dtype: category
Categories (10, object): ['APM', 'Adipocyte', 'DP', 'Dividin papillary', ...,
'Pericyte', 'Preadipocyte', 'Reticular', 'papillary']

```

```

[109]: group_label = []
      for value in group:
          if 'pap' in value:
              group_label.append('papillary')
          elif 'Ret' in value:
              group_label.append('reticular')
          elif 'Pre' in value:
              group_label.append('reticular')
          else:
              group_label.append('')

```

```

[111]: fbs.obs.group = group_label

```

```

[112]: sc.pl.umap(fbs, color='group')

```

```

C:\Users\hhy696\OneDrive - Queen Mary, University of
London\Bioinformatics\bioinf\lib\site-packages\anndata\_core\anndata.py:1220:
FutureWarning: The `inplace` parameter in pandas.Categorical.reorder_categories
is deprecated and will be removed in a future version. Removing unused
categories will always return a new Categorical object.
  c.reorder_categories(natsorted(c.categories), inplace=True)
... storing 'group' as categorical

```

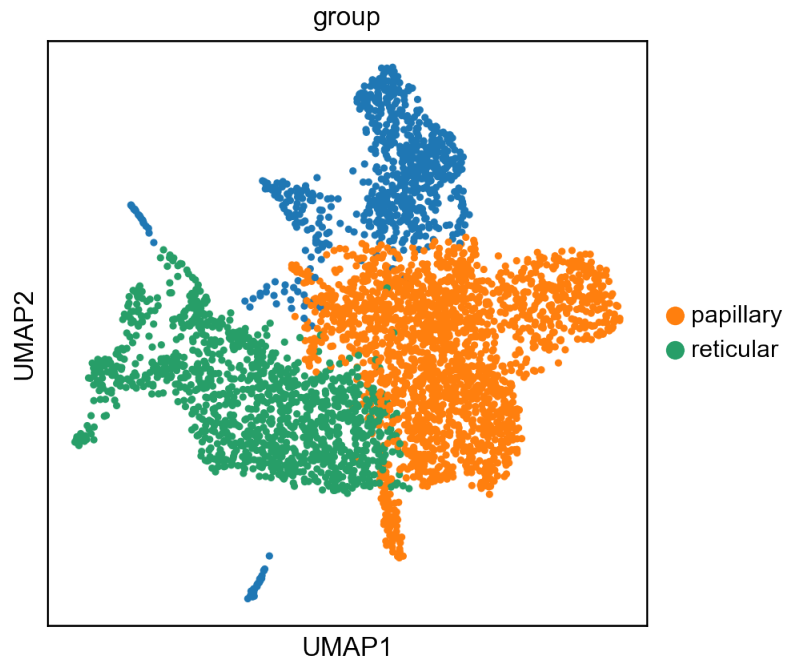

```
[114]: sc.tl.rank_genes_groups(fbs, 'group', method='t-test',
    ↪groups=['papillary', 'reticular'])
sc.pl.rank_genes_groups(fbs, n_genes=25, sharey=False)
```

ranking genes

```
finished: added to `.uns['rank_genes_groups']`
'names', sorted np.recarray to be indexed by group ids
'scores', sorted np.recarray to be indexed by group ids
'logfoldchanges', sorted np.recarray to be indexed by group ids
'pvals', sorted np.recarray to be indexed by group ids
'pvals_adj', sorted np.recarray to be indexed by group ids (0:00:00)
```

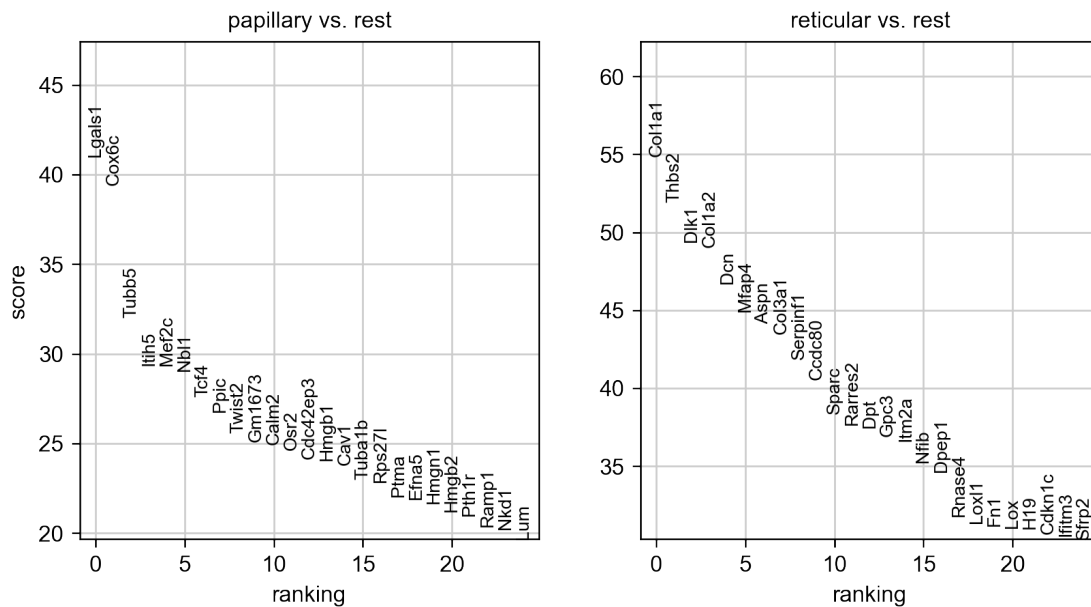

```
[115]: pap = sc.queries.enrich(fbs, 'papillary', gprofiler_kwargs={'all_results':True,
↪ 'sources':['GO:BP']})
ret = sc.queries.enrich(fbs, 'reticular', gprofiler_kwargs={'all_results':True,
↪ 'sources':['GO:BP']})
```

```
[116]: pap.to_csv('PvsR.csv')
ret.to_csv('RvsP.csv')
```

```
[117]: pr = fbs[fbs.obs.group.isin(['papillary','reticular'])]
sc.pl.umap(pr)
```

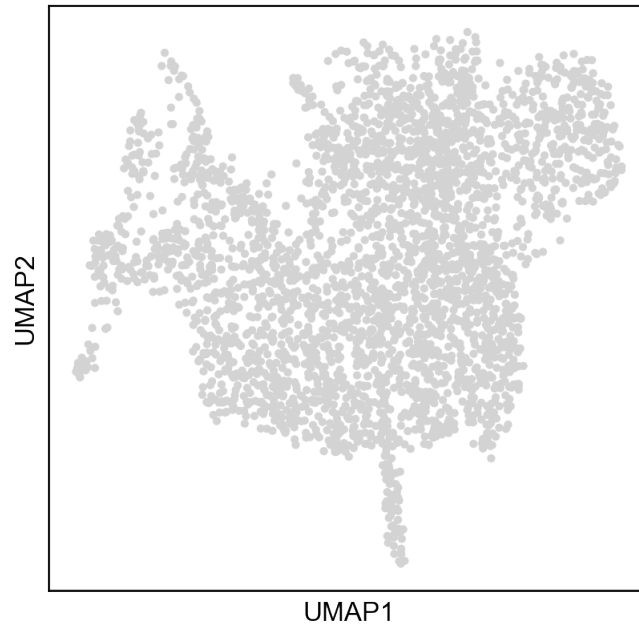

```
[118]: sc.tl.rank_genes_groups(pr, 'group', method='t-test')
       sc.pl.rank_genes_groups(pr, n_genes=25, sharey=False)
```

ranking genes

Trying to set attribute ``.uns`` of view, copying.

```
finished: added to `.uns['rank_genes_groups']`
'names', sorted np.recarray to be indexed by group ids
'scores', sorted np.recarray to be indexed by group ids
'logfoldchanges', sorted np.recarray to be indexed by group ids
'pvals', sorted np.recarray to be indexed by group ids
'pvals_adj', sorted np.recarray to be indexed by group ids (0:00:00)
```



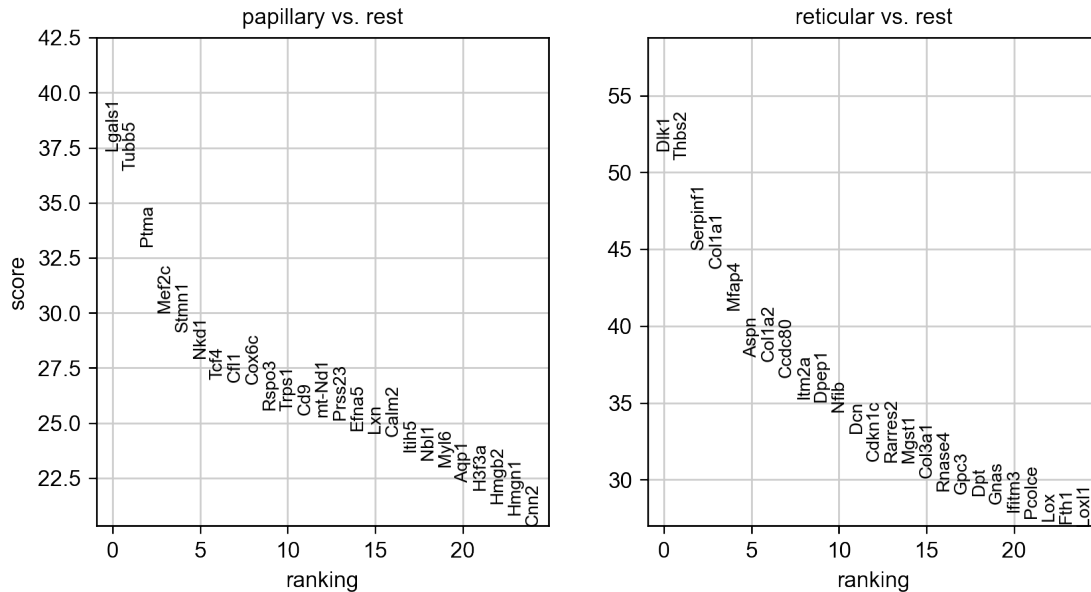

```
[122]: pap = sc.queries.enrich(pr, 'papillary', org='mmusculus',
    ↪gprofiler_kwargs={'all_results':True, 'sources':['GO:BP']})
ret = sc.queries.enrich(pr, 'reticular', org='mmusculus',
    ↪gprofiler_kwargs={'all_results':True, 'sources':['GO:BP']})
```

```
[123]: pap.to_csv('PvsR.csv')
ret.to_csv('RvsP.csv')
```

```
[121]: sc.queries.enrich(pr, 'papillary', org='mmusculus',
    ↪gprofiler_kwargs={'all_results':True, 'sources':['GO:BP']})
```

```
[121]:
```

|       | source | native     | name \                                        |
|-------|--------|------------|-----------------------------------------------|
| 0     | GO:BP  | GO:0071840 | cellular component organization or biogenesis |
| 1     | GO:BP  | GO:0044237 | cellular metabolic process                    |
| 2     | GO:BP  | GO:0016043 | cellular component organization               |
| 3     | GO:BP  | GO:0008152 | metabolic process                             |
| 4     | GO:BP  | GO:0006807 | nitrogen compound metabolic process           |
| ...   | ...    | ...        | ...                                           |
| 12280 | GO:BP  | GO:0034230 | enkephalin processing                         |
| 12281 | GO:BP  | GO:0034238 | macrophage fusion                             |
| 12282 | GO:BP  | GO:0034239 | regulation of macrophage fusion               |
| 12283 | GO:BP  | GO:0034350 | regulation of glial cell apoptotic process    |
| 12284 | GO:BP  | GO:2001311 | lysobisphosphatidic acid metabolic process    |

  

|   | p_value       | significant \ |
|---|---------------|---------------|
| 0 | 7.668515e-116 | True          |
| 1 | 2.989177e-111 | True          |

|       |               |       |
|-------|---------------|-------|
| 2     | 1.379987e-105 | True  |
| 3     | 2.537420e-100 | True  |
| 4     | 1.574006e-88  | True  |
| ...   | ...           | ...   |
| 12280 | 1.000000e+00  | False |
| 12281 | 1.000000e+00  | False |
| 12282 | 1.000000e+00  | False |
| 12283 | 1.000000e+00  | False |
| 12284 | 1.000000e+00  | False |

|       | description                                       | term_size \ |
|-------|---------------------------------------------------|-------------|
| 0     | "A process that results in the biosynthesis of... | 6270        |
| 1     | "The chemical reactions and pathways by which ... | 10350       |
| 2     | "A process that results in the assembly, arran... | 6090        |
| 3     | "The chemical reactions and pathways, includin... | 11429       |
| 4     | "The chemical reactions and pathways involving... | 9669        |
| ...   | ...                                               | ...         |
| 12280 | "The formation of mature enkephalin, a pentape... | 3           |
| 12281 | "The binding and fusion of a macrophage to one... | 6           |
| 12282 | "Any process that modulates the frequency, rat... | 5           |
| 12283 | "Any process that modulates the frequency, rat... | 12          |
| 12284 | "The chemical reactions and pathways involving... | 2           |

|       | query_size | intersection_size | effective_domain_size | precision \ |
|-------|------------|-------------------|-----------------------|-------------|
| 0     | 4480       | 1976              | 21118                 | 0.441071    |
| 1     | 4480       | 2868              | 21118                 | 0.640179    |
| 2     | 4480       | 1904              | 21118                 | 0.425000    |
| 3     | 4480       | 3057              | 21118                 | 0.682366    |
| 4     | 4480       | 2653              | 21118                 | 0.592187    |
| ...   | ...        | ...               | ...                   | ...         |
| 12280 | 4480       | 2                 | 21118                 | 0.000446    |
| 12281 | 4480       | 2                 | 21118                 | 0.000446    |
| 12282 | 4480       | 1                 | 21118                 | 0.000223    |
| 12283 | 4480       | 6                 | 21118                 | 0.001339    |
| 12284 | 4480       | 2                 | 21118                 | 0.000446    |

|       | recall   | query   | parents                  |
|-------|----------|---------|--------------------------|
| 0     | 0.315152 | query_1 | [G0:0009987]             |
| 1     | 0.277101 | query_1 | [G0:0008152, G0:0009987] |
| 2     | 0.312644 | query_1 | [G0:0071840]             |
| 3     | 0.267477 | query_1 | [G0:0008150]             |
| 4     | 0.274382 | query_1 | [G0:0008152]             |
| ...   | ...      | ...     | ...                      |
| 12280 | 0.666667 | query_1 | [G0:0016486]             |
| 12281 | 0.333333 | query_1 | [G0:0000768]             |
| 12282 | 0.200000 | query_1 | [G0:0034238, G0:0060142] |
| 12283 | 0.500000 | query_1 | [G0:0034349, G0:0042981] |

```
12284 1.000000 query_1 [GO:0006650, GO:0052646]
```

```
[12285 rows x 14 columns]
```

```
[138]: fbs.write('P2 fibroblasts.h5ad', compression='lzf')
```

```
[151]: UV = pd.read_csv('../Genesets/response to UV go term.csv', header=None)
```

```
[165]: UV = [x[0] for x in UV.values if x[0] in fbs.raw.var_names]
```

```
[169]: sc.pl.dotplot(fbs, groupby='cell_type', var_names=UV)
```

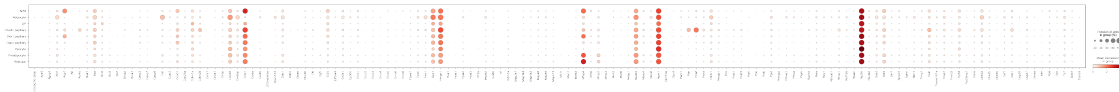

```
[171]: sc.tl.score_genes(fbs, UV, score_name='UV', use_raw=True)
```

```
computing score 'UV'
finished: added
'UV', score of gene set (adata.obs).
1038 total control genes are used. (0:00:00)
```

```
[172]: sc.pl.umap(fbs, color='UV')
```

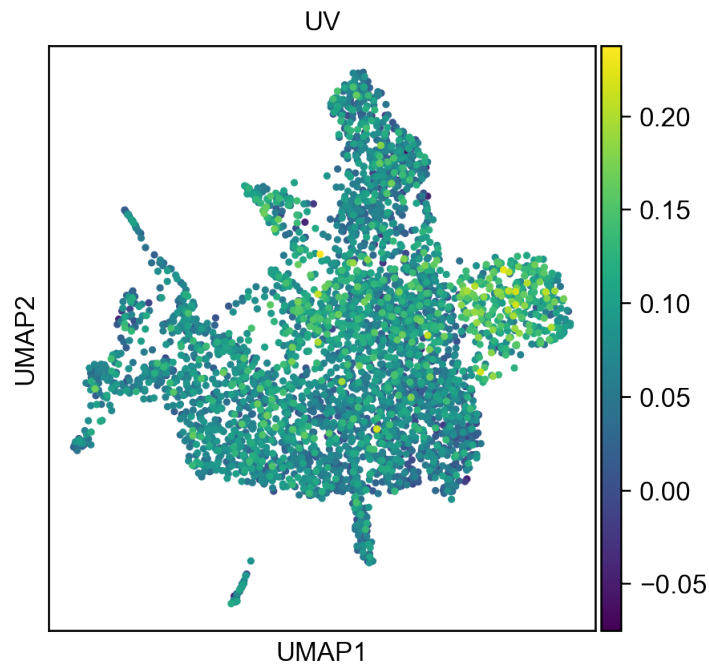

```
[175]: sc.pl.dotplot(fbs, groupby='cell_type', var_names='UV', standard_scale='var')
```

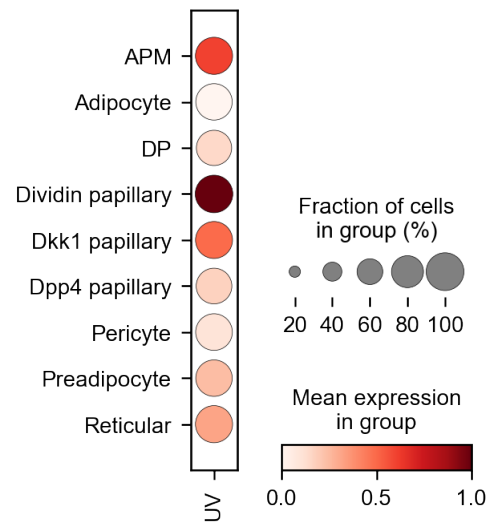

```
[200]: sc.pl.violin(fbs, groupby='cell_type', keys='UV', rotation=90)
```

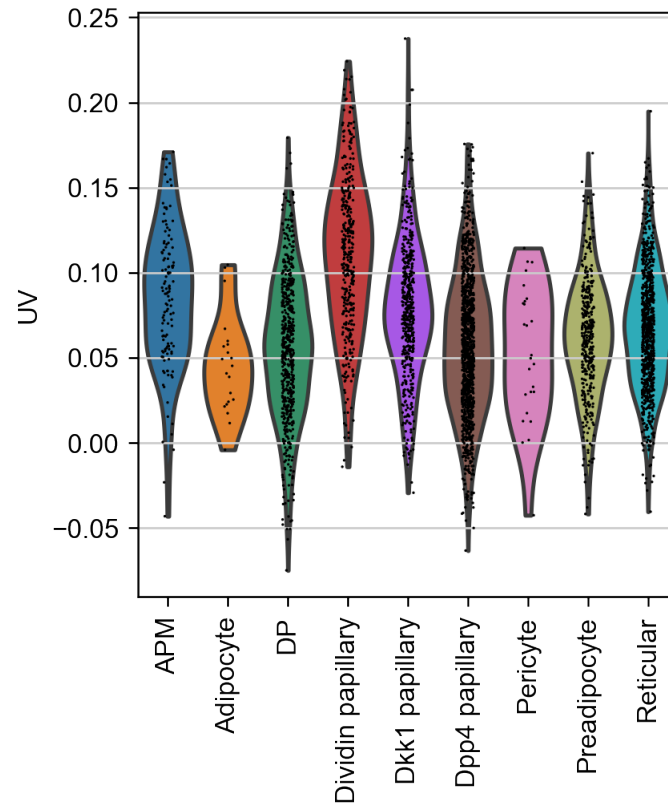

```
[199]: sc.pl.violin(fbs, groupby='group', keys='UV', standard_scale='var', rotation=90)
```

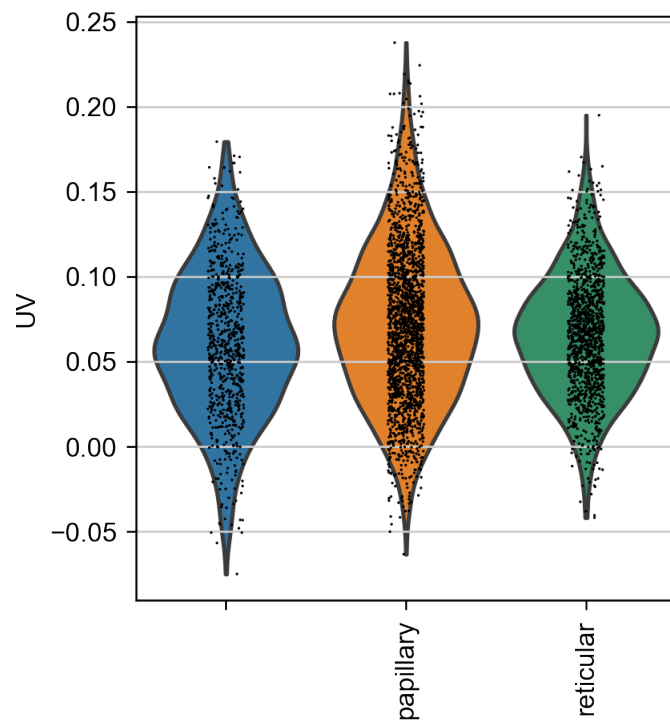

```
[181]: sc.pl.stacked_violin(fbs, groupby='cell_type', var_names='UV',
    ↪standard_scale='var', rotation=90)
```

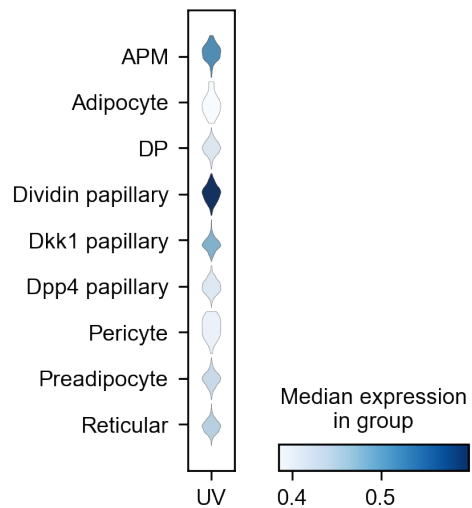

```
[182]: sc.pl.tracksplot(fbs, groupby='cell_type', var_names='UV',
↳ standard_scale='var', rotation=90)
```

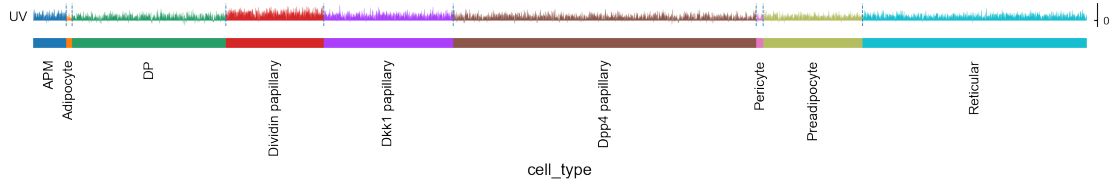

```
[186]: score = sc.get.obs_df(fbs, keys=['UV', 'cell_type'],)
```

```
[187]: score
```

```
[187]:
```

|                                     | UV       | cell_type         |
|-------------------------------------|----------|-------------------|
| CellID                              |          |                   |
| P2P21CellCount03:AAGCCGCCACGGCCATx  | 0.084893 | Reticular         |
| P2P21CellCount03:AAACGGGTCCAGATCAx  | 0.050989 | Dpp4 papillary    |
| P2P21CellCount03:AACTCTTAGCTACCTAx  | 0.082482 | Dkk1 papillary    |
| P2P21CellCount03:AAAGATGCATCCTTGCAx | 0.104169 | APM               |
| P2P21CellCount03:AAAGTAGAGGCAGTCAx  | 0.027938 | Dkk1 papillary    |
| ...                                 | ...      | ...               |
| P2P21CellCount05:TTCGAAGGTTCGTGATx  | 0.077811 | Reticular         |
| P2P21CellCount05:TTCTCAATCCTACAGAx  | 0.166840 | APM               |
| P2P21CellCount05:TTTGGTTTCCCTCTTTx  | 0.034200 | Reticular         |
| P2P21CellCount05:TTTGCGCTCAGAAATGx  | 0.082082 | Dividin papillary |
| P2P21CellCount05:TTGTAGGGTGAAATCAx  | 0.062377 | Reticular         |

```
[3961 rows x 2 columns]
```

```
[194]: chart = sns.catplot(x="cell_type", y="UV", kind="box", data=score)
chart.set_xticklabels(rotation=90)
```

```
[194]: <seaborn.axisgrid.FacetGrid at 0x24e361f2eb0>
```

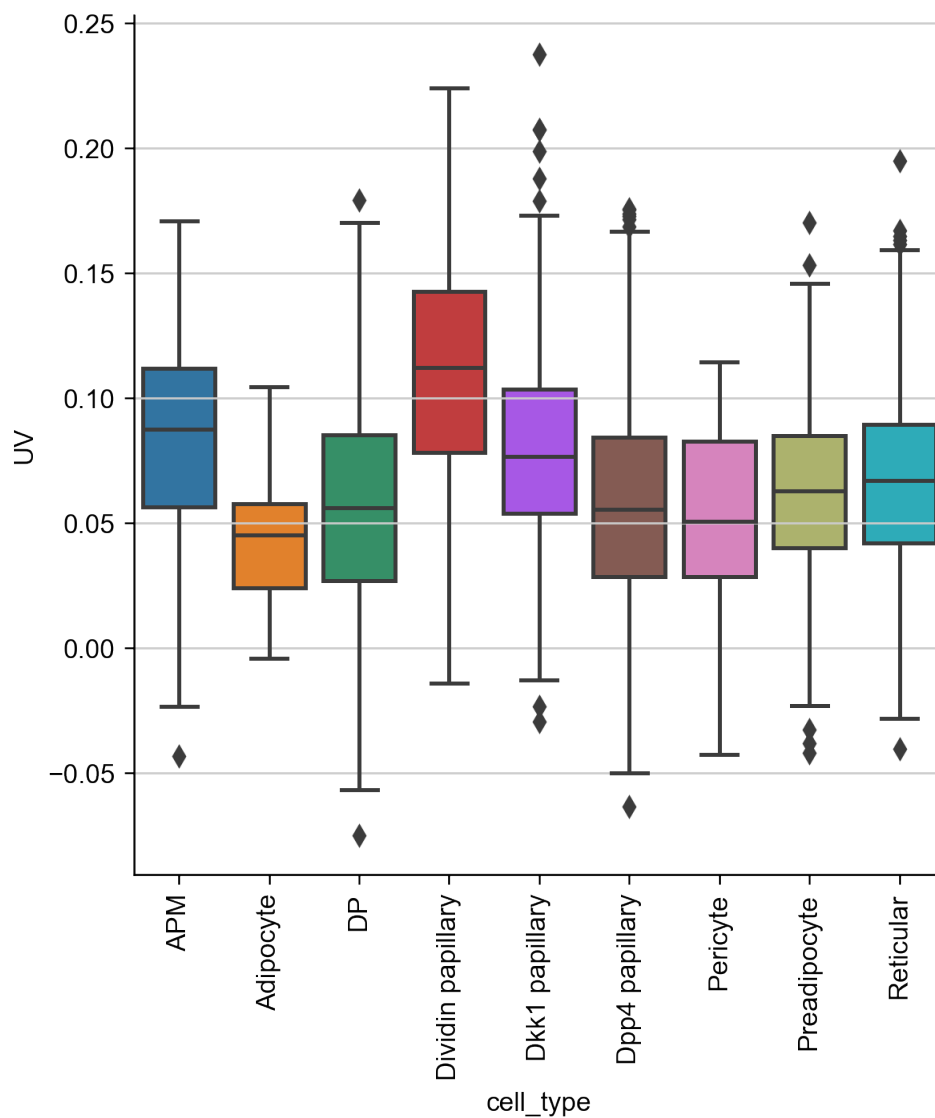

```
[195]: score2 = sc.get.obs_df(fbs, keys=['UV', 'group'],)
```

```
[198]: chart = sns.catplot(x="group", y="UV", kind="box", data=score2)
chart.set_xticklabels(rotation=90)
```

```
[198]: <seaborn.axisgrid.FacetGrid at 0x24e39112760>
```



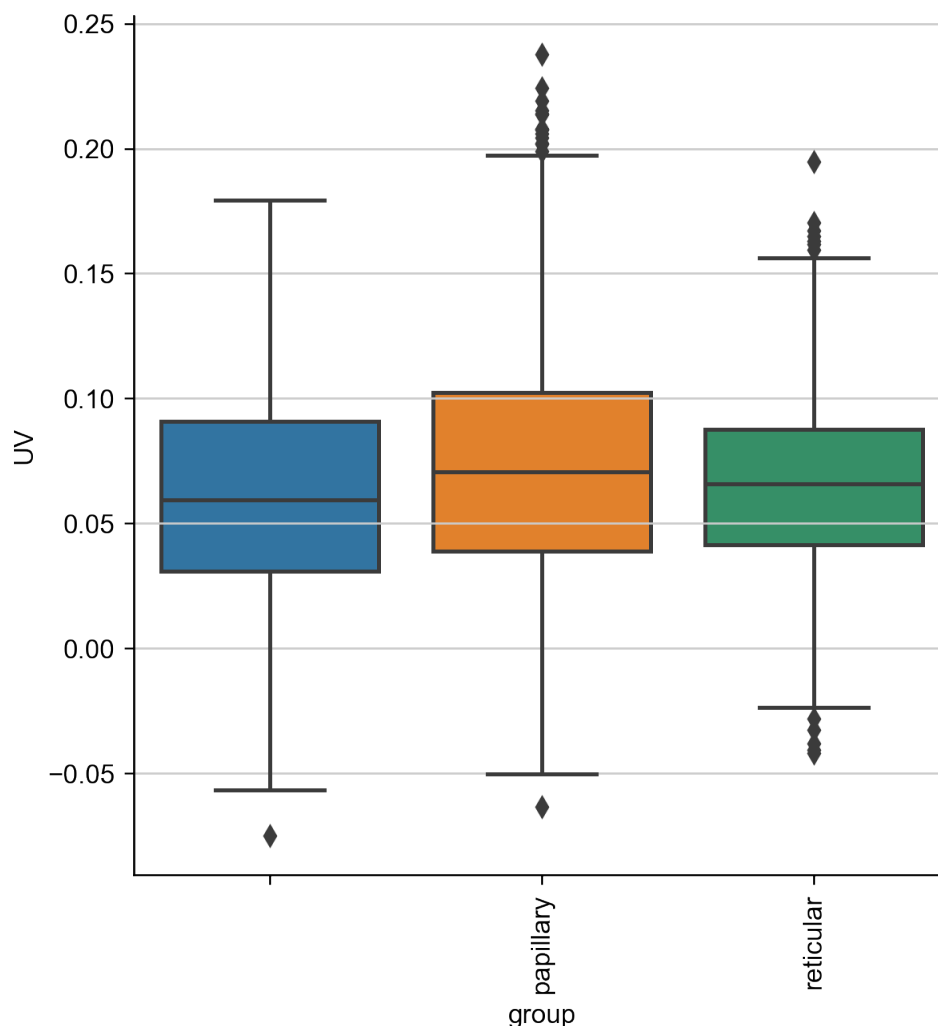

```
[203]: [print(x, end=', ') for x in UV]
```

1700007K13Rik, Actr5, Agap3, Akt1, Aqp1, Atr, Aurkb, Bak1, Bax, Bcl2, Bcl3, Bmf, Brca2, Brsk1, Casp3, Casp7, Casp9, Cat, Ccar2, Ccnd1, Cdc25a, Cdkn1a, Cdkn2d, Cers1, Chek1, Cirbp, Cops9, Crebbp, Crip1, Cryaa, Cul4b, D7Ert443e, Dcun1d3, Ddb1, Ddb2, Ddias, Dhx36, Dtl, Egfr, Ei24, Eif2ak4, Eif2s1, Ep300, Ercc1, Ercc2, Ercc3, Ercc4, Ercc5, Ercc6, Ercc8, Fbxw7, Fech, Fmr1, Gpx1, Hmgn1, Hus1, Hyal1, Hyal2, Hyal3, Il12a, Impact, Ino80, Ivl, Kdm1a, Map2k7, Map3k4, Map4k3, Mapk8, Mapk9, Mapk13, Mc1r, Men1, Mettl3, Mfap4, Mme, Mmp2, Mmp3, Msh2, Msh6, N4bp1, Nedd4, Nfatc4, Noc2l, Npm1, Opn1sw, Opn3, Parp1, Pbk, Pclaf, PcnA, Pik3r1, Pmaip1, Pml, Pold1, Pold3, Polh, Poli, Polk, Ppid, Primpol, Prkaa1, Prkcd, Ptpkr, Rad18, Rela, Rev1, Rhbdd1, Rhno1, Rnf168, Rpain, Rpl26, Ruvbl2, Sde2, Sdf4, Sirt1, Smpd1, Sprtn, Stk11, Timp1, Tipin, Tmem161a, Triap1, Trim32, Trp53, Trp53inp1, Uaca, Ube2a, Ube2b, Ube4b, Usf1, Usp1, Usp28, Usp47, Uvssa, Wrn, Xpa, Xpc, Yy1, Zbtb1, Zranb3,

```
[203]: [None,
```

[illegible]

[illegible]

```
[214]: score[score.cell_type=='Dpp4 papillary'].UV.mean()
score[score.cell_type=='Reticular'].UV.mean()
score[score.cell_type=='Dpp4 papillary'].UV.std()
score[score.cell_type=='Reticular'].UV.std()
score[score.cell_type=='Dpp4 papillary']
score[score.cell_type=='Reticular']
```

```
[214]:
```

|                                     | UV        | cell_type |
|-------------------------------------|-----------|-----------|
| CellID                              |           |           |
| P2P21CellCount03:AAGCCGCCACGGCCATx  | 0.084893  | Reticular |
| P2P21CellCount03:AACGTTGCATCGGAAGx  | 0.037578  | Reticular |
| P2P21CellCount03:AAACCTGAGCAATCTCx  | 0.055654  | Reticular |
| P2P21CellCount03:AACGTTGTCGGTGTCTGx | 0.022926  | Reticular |
| P2P21CellCount03:AAGGAGCAGCGTCTATx  | 0.120349  | Reticular |
| ...                                 | ...       | ...       |
| P2P21CellCount05:TTTCCTCCATGTTGACx  | -0.019489 | Reticular |
| P2P21CellCount05:TTGTAGGGTAAGGATTx  | 0.097729  | Reticular |
| P2P21CellCount05:TTCGAAGGTTCTGTGATx | 0.077811  | Reticular |
| P2P21CellCount05:TTTGGTTCCCTCTTTx   | 0.034200  | Reticular |
| P2P21CellCount05:TTGTAGGGTGAAATCAx  | 0.062377  | Reticular |

[844 rows x 2 columns]

```
[215]: chart = sns.catplot(y="cell_type", x="UV", kind="box", data=score)
chart.set_xticklabels(rotation=90)
```

```
[215]: <seaborn.axisgrid.FacetGrid at 0x24e476d1f70>
```

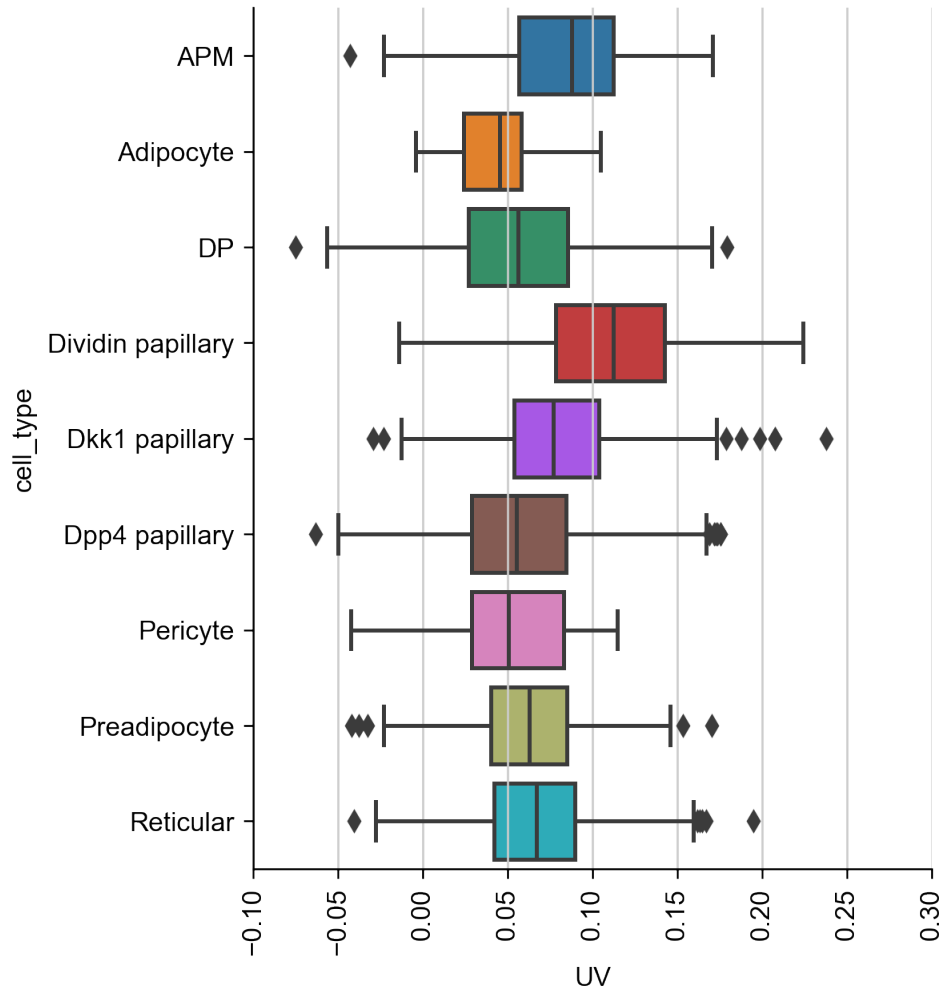

```
[218]: main_clusters = [
    → ['Fibroblast', 'Keratinocyte', 'Fibroblast', 'Keratinocyte', 'Fibroblast', 'Keratinocyte', 'Fibroblast',
      'Endothelial', 'SMC/
    → pericyte', 'Schwann', 'Keratinocyte', 'Melanocyte', 'Immune', 'Endothelial', 'Keratinocyte']
adata.obs['cell_type'] = [main_clusters[int(x)] for x in adata.obs.leiden]

[219]: sc.pl.umap(adata, color='cell_type')
```

C:\Users\hhy696\OneDrive - Queen Mary, University of London\Bioinformatics\bioinf\lib\site-packages\anndata\\_core\anndata.py:1220: FutureWarning: The `inplace` parameter in pandas.Categorical.reorder\_categories is deprecated and will be removed in a future version. Removing unused categories will always return a new Categorical object.

```
c.reorder_categories(natsorted(c.categories), inplace=True)
... storing 'cell_type' as categorical
```

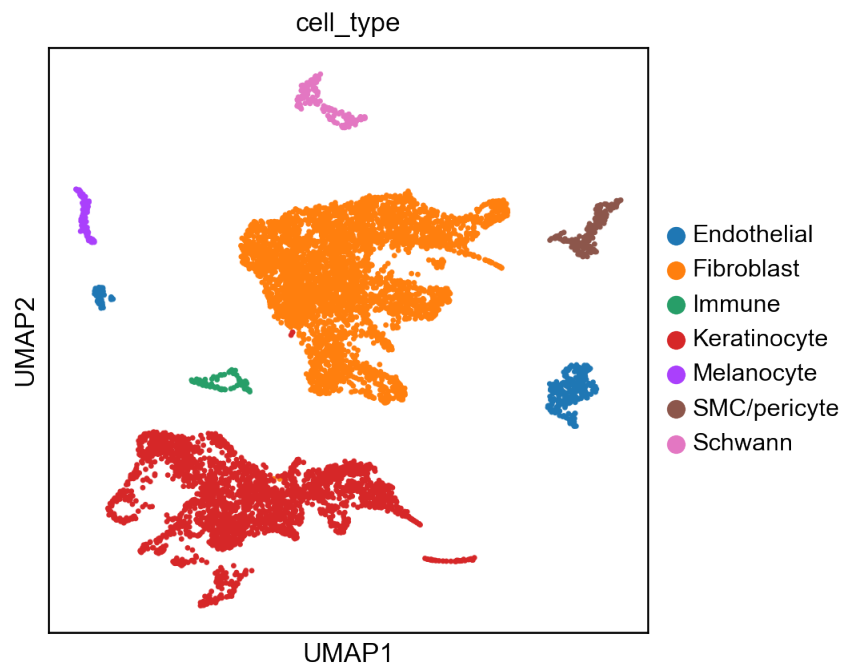

```
[220]: sc.pl.umap(fbs, color='leiden')
```

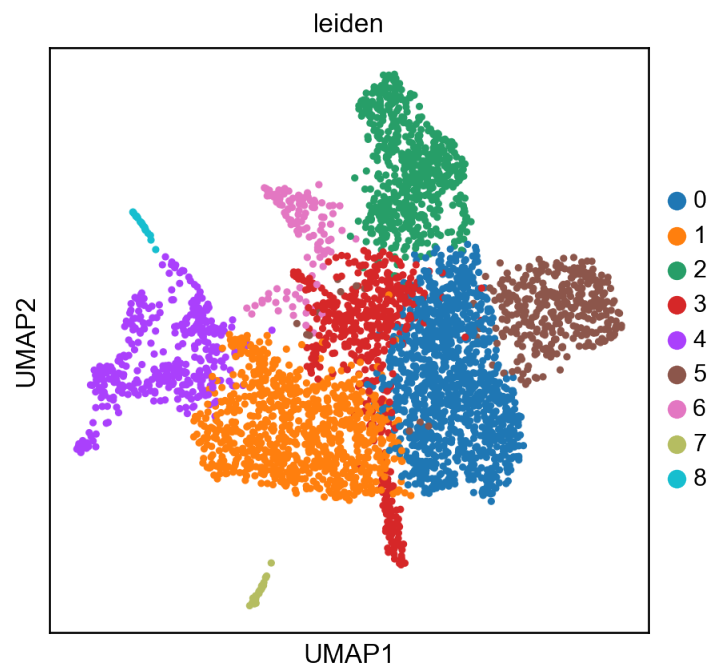

```
[221]: fb_clusters =
→ ['Papillary', 'Reticular', 'Other', 'Papillary', 'Preadipocyte', 'Papillary', 'Other', 'Other', 'Ad
fbs.obs['subtype'] = [fb_clusters[int(x)] for x in fbs.obs.leiden]
```

```
[226]: sc.pl.umap(fbs, color='subtype',
→ groups=['Papillary', 'Reticular', 'Preadipocyte', 'Adipocyte', 'Other'])
```

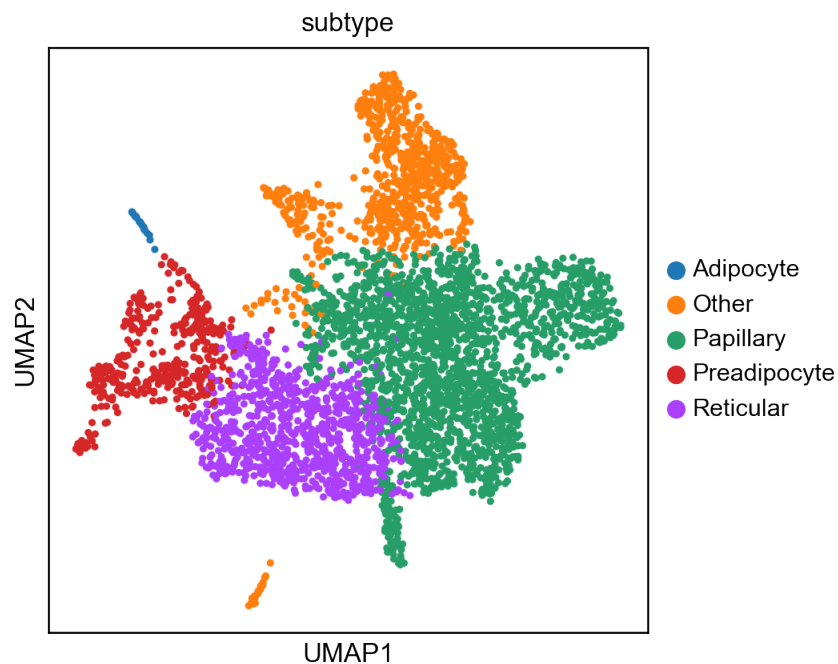

```
[237]: fbs.obs['subtype'] = fbs.obs['subtype'].cat.
→ reorder_categories(['Papillary', 'Reticular', 'Preadipocyte', 'Adipocyte', 'Other'])
```

```
[238]: sc.pl.umap(fbs, color='subtype')
```



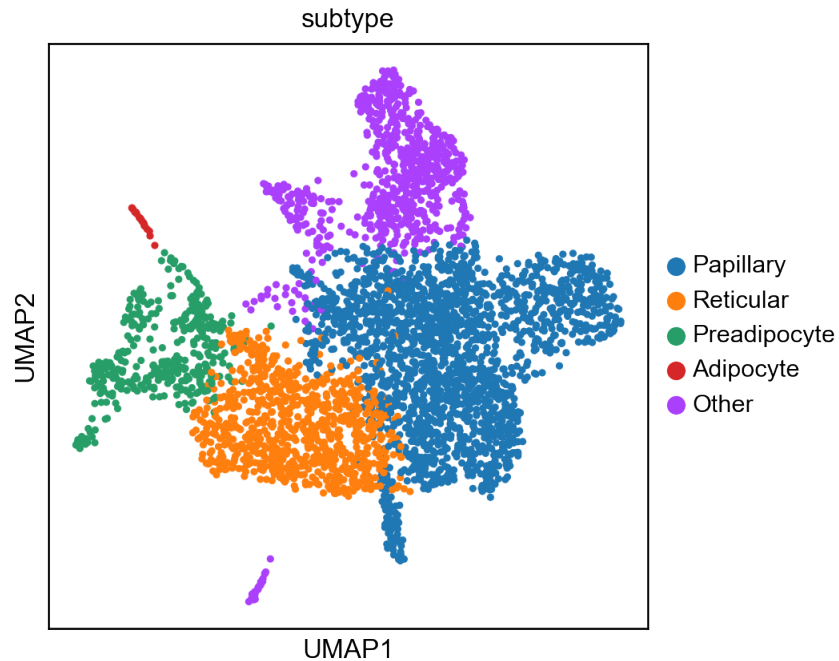

```
[240]: sc.tl.rank_genes_groups(fbs, 'subtype', method='t-test')
       sc.pl.rank_genes_groups(fbs, n_genes=25, sharey=False)
```

ranking genes

```
finished: added to `.uns['rank_genes_groups']`
'names', sorted np.recarray to be indexed by group ids
'scores', sorted np.recarray to be indexed by group ids
'logfoldchanges', sorted np.recarray to be indexed by group ids
'pvals', sorted np.recarray to be indexed by group ids
'pvals_adj', sorted np.recarray to be indexed by group ids (0:00:00)
```

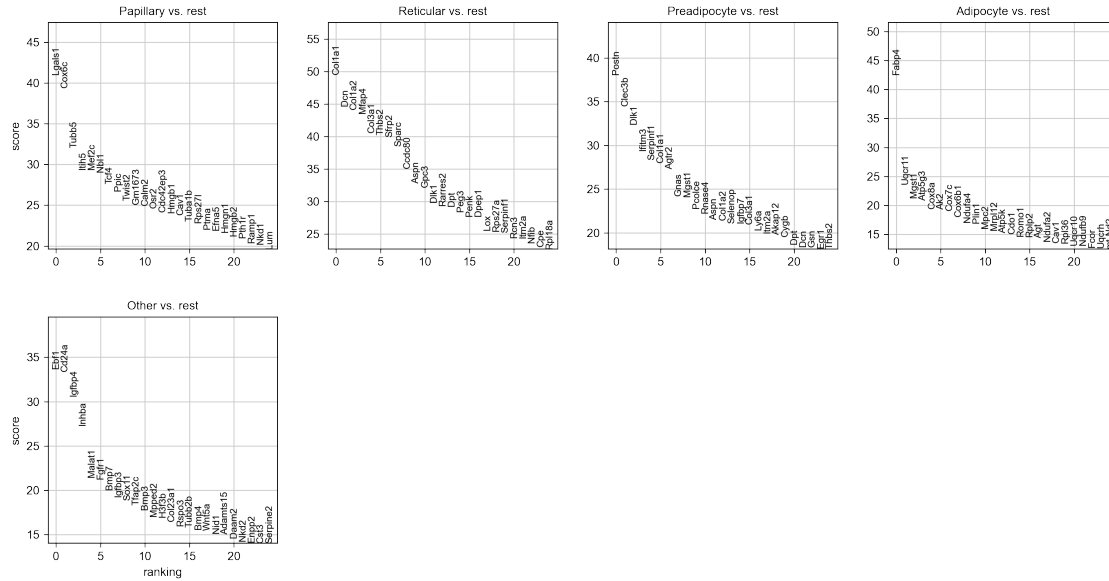

```
[242]: pd.DataFrame(fbs.uns['rank_genes_groups']['names']).head(10)
```

```
[242]:   Papillary Reticular Preadipocyte Adipocyte   Other
0    Lgals1    Col1a1         Postn     Fabp4    Ebf1
1    Cox6c      Dcn         Clec3b    Uqcr11    Cd24a
2    Tubb5    Col1a2         Dlk1     Mgst1    Igfbp4
3    Itih5    Mfap4         Ifitm3    Atp5g3    Inhba
4    Mef2c    Col3a1    Serpinf1     Cox8a    Malat1
5    Nbl1     Thbs2     Col1a1         Ak2    Fgfr1
6    Tcf4     Sfrp2     Agtr2     Cox7c    Bmp7
7    Ppic     Sparc         Gnas    Cox6b1    Igfbp3
8    Twist2    Ccdc80     Mgst1    Ndufa4    Sox11
9    Gm1673     Aspn     Pcolce     Plin1    Tfap2c
```

```
[247]: sig_genes = sc.get.rank_genes_groups_df(fbs, group=None, pval_cutoff=0.05,
↪ log2fc_min=0)
```

```
[253]: list(sig_genes[sig_genes.group=='Papillary'].names.values)
```

```
[253]: ['Lgals1',
        'Cox6c',
        'Tubb5',
        'Itih5',
        'Mef2c',
        'Nbl1',
        'Tcf4',
        'Ppic',
        'Twist2',
```

'Gm1673',  
'Calm2',  
'Osr2',  
'Cdc42ep3',  
'Hmgb1',  
'Cav1',  
'Tuba1b',  
'Rps27l',  
'Ptma',  
'Efna5',  
'Hmgn1',  
'Hmgb2',  
'Pth1r',  
'Ramp1',  
'Nkd1',  
'Lum',  
'Myl6',  
'H2afv',  
'Rgs10',  
'Birc5',  
'Hmgn2',  
'Pclaf',  
'Stmn1',  
'H3f3a',  
'Ppia',  
'Col7a1',  
'Wls',  
'Maf',  
'H2afz',  
'Txn1',  
'Ran',  
'Pitx2',  
'Emp2',  
'mt-Nd1',  
'Itga4',  
'Hmgb3',  
'Tpm4',  
'Prss23',  
'Wisp1',  
'Top2a',  
'Csrp1',  
'Cdca3',  
'Grem2',  
'Tmsb10',  
'Lhfp',  
'Srsf3',  
'Cd9',

'Htra1',  
'Ccnb2',  
'Fxyd6',  
'Nusap1',  
'Dkk1',  
'Spc24',  
'Stxbp6',  
'Cdca8',  
'Ccdc42',  
'Cdk1',  
'Cenpm',  
'Mxd3',  
'AC154509.1',  
'Trps1',  
'Lockd',  
'Ybx1',  
'Cfl1',  
'Ccna2',  
'Efnb2',  
'Pbk',  
'Smc2',  
'Ranbp1',  
'Nucks1',  
'Racgap1',  
'Nrn1',  
'Cenpa',  
'Anxa5',  
'Adamts5',  
'Cnbp',  
'Aqp1',  
'Mki67',  
'Tk1',  
'Fam198b',  
'Eif5a',  
'Tmem9',  
'Tyms',  
'Prc1',  
'Smc4',  
'Emp3',  
'Lmna',  
'Tead2',  
'Dnajc9',  
'Cenpf',  
'Tpx2',  
'Anxa2',  
'2310022B05Rik',  
'Ccnd1',

'Actb',  
'Hmcn1',  
'Anp32a',  
'Tpst1',  
'Atpif1',  
'Rpl7',  
'Tmem132c',  
'Elob',  
'Pmf1',  
'Ckap2l',  
'Eif2s2',  
'Eif4a1',  
'Tmpe',  
'Pfn1',  
'Pdap1',  
'Rad51ap1',  
'Ube2e3',  
'Snrpd1',  
'Enho',  
'Timm13',  
'Ska1',  
'Vgll3',  
'Raly',  
'Bex3',  
'Cks2',  
'Tpm2',  
'Phldb2',  
'Igsf10',  
'Tubb6',  
'Lsm4',  
'Ptk7',  
'Fgfr4',  
'Dek',  
'Ccnb1',  
'Cdc20',  
'Slc25a5',  
'Cdk4',  
'Hmnr',  
'Mns1',  
'Vim',  
'Emid1',  
'Cdkn3',  
'Mapre2',  
'Cenpe',  
'Atp5k',  
'Megf6',  
'Sh3bgrl3',

'Minos1',  
'Asf1b',  
'Lig1',  
'Psm6',  
'Dkk2',  
'Atp5e',  
'Emp1',  
'Fam174b',  
'Pianp',  
'Ppp1ca',  
'Psm7',  
'Rgs2',  
'Tmem109',  
'Eif1b',  
'Nme1',  
'Meox2',  
'Aurkb',  
'Crip1',  
'Hmgn3',  
'Pimreg',  
'Robo2',  
'Nat81',  
'Col6a2',  
'Ube2c',  
'Cnn2',  
'Tceal9',  
'Lxn',  
'Dbf4',  
'Gmnn',  
'Grem1',  
'Incenp',  
'Col26a1',  
'Sept7',  
'Gm14964',  
'Ptpa',  
'Lsm5',  
'Anp32e',  
'Cnn3',  
'Eef1d',  
'Sgo2a',  
'Rrm2',  
'mt-Nd4',  
'Calm1',  
'Hnrnp',  
'Dcl1',  
'Glt',  
'Ddx39b',

'Snrpd2',  
'Fez1',  
'Creb5',  
'Ddah1',  
'Vdac1',  
'Erh',  
'4930579G24Rik',  
'Atp5h',  
'Cdkn2c',  
'Syce2',  
'Tubb4b',  
'Limch1',  
'Mbd3',  
'Hnrnpa3',  
'Nt5e',  
'Mad2l1',  
'Sgo1',  
'Psmc5',  
'Melk',  
'Sostdc1',  
'Ckap2',  
'Psmc4',  
'Aurka',  
'Rnaseh2b',  
'Entpd1',  
'Atp5j2',  
'Atp5g1',  
'Ywhah',  
'Ndc80',  
'Axin2',  
'Mafb',  
'Smdt1',  
'Cav2',  
'H2afy2',  
'Tcf19',  
'Casp3',  
'Clspn',  
'Hnrnpdl',  
'H2afx',  
'Bub1b',  
'Npm1',  
'Kif20a',  
'Slc25a4',  
'Sppl2b',  
'Tipin',  
'Egfl6',  
'Cox7a2',

'Cenpp',  
'Psmb7',  
'Mrfap1',  
'B4galnt1',  
'Hpf1',  
'Nasp',  
'Arpp19',  
'Chod1',  
'Clic1',  
'Ppil1',  
'Oaz1',  
'Ndufa2',  
'Atp5o-1',  
'Kifc1',  
'Hist1h1b',  
'mt-Nd5',  
'Tpi1',  
'Atp5c1',  
'Plxna4',  
'Glipr2',  
'Crabp2',  
'Uqcr10',  
'Snrpf',  
'Diaph3',  
'Tmsb4x',  
'Cox6a1',  
'Cenpq',  
'Chmp2b',  
'Prdx2',  
'Ptges3',  
'Psmb3',  
'Dynl11',  
'Snrpa',  
'Spc25',  
'Cenpn',  
'Vstm2b',  
'Fam111a',  
'Dhx32',  
'Kn11',  
'Neil3',  
'Kif22',  
'Pgrmc1',  
'Cdc25c',  
'Ostc',  
'Nrm',  
'Rfc4',  
'Ncapg',



'Mcm3',  
'Slitrk6',  
'Bag1',  
'Hint1',  
'Rpl22l1',  
'Nuf2',  
'Rbx1',  
'Rfc2',  
'Ywhae',  
'Nudc',  
'Prdx1',  
'Hirip3',  
'Rgs16',  
'Shcbp1',  
'Cdca5',  
'Rps12',  
'Akr1a1',  
'Rnaseh2c',  
'Eif1ax',  
'Idh2',  
'Mcm5',  
'Ccdc124',  
'Lmcd1',  
'Limd2',  
'Lmnb1',  
'Plk1',  
'Impa2',  
'Arhgdia',  
'Rrm1',  
'Kif2c',  
'Hspg2',  
'Ncl',  
'Ndufa11',  
'Eny2',  
'Uhrf1',  
'Fam107b',  
'Cavin3',  
'Kif4',  
'Anxa6',  
'2900026A02Rik',  
'Apela',  
'Fhod3',  
'Calr',  
'Ilf2',  
'Tacc3',  
'Lyar',  
'Tmem47',

'Fus',  
'Ubl5',  
'Nudt21',  
'Rangap1',  
'Srsf7',  
'Bub1',  
'Lmnb2',  
'Ewsr1',  
'Ndufb8',  
'Prdx6',  
'Sf3b6',  
'Psmc3ip',  
'Tacc2',  
'Banf1',  
'Hnrnpk',  
'Ilk',  
'Hnrnpab',  
'Sap30',  
'Depdc1a',  
'Ufsp2',  
'Uqcrb',  
'Mrgprf',  
'Syt12',  
'Sapcd2',  
'Ncapd2',  
'C330027C09Rik',  
'a',  
'4930444P10Rik',  
'Nudcd2',  
'Mdh1',  
'Ppih',  
'Snap23',  
'Cep135',  
'Uqcrc1',  
'Cbx5',  
'Kif23',  
'Ywhaq',  
'Ppp1r1a',  
'Slc25a3',  
'Rpl7a',  
'Ncam1',  
'Mtss1',  
'Arhgap11a',  
'Snrpe',  
'Kif11',  
'Hist1h2ae',  
'Morf4l2',

'Ndufb6',  
'Cox6b1',  
'Lsm6',  
'Gm48960',  
'mt-Nd2',  
'Pfdn6',  
'Mrp158',  
'Ass1',  
'Cox7b',  
'Gtf2a2',  
'Cux1',  
'Fubp1',  
'Cfl2',  
'Kif20b',  
'Mcm6',  
'Mcm2',  
'Smco3',  
'Sost',  
'1110004F10Rik',  
'Fip111',  
'Ncaph',  
'Sf3b5',  
'Esco2',  
'Adamts17',  
'Nsg1',  
'Gas2l3',  
'Ptbp1',  
'Cdc42',  
'Thy1',  
'Cenph',  
'S100a11',  
'Eef1g',  
'Lage3',  
'Bub3',  
'Chaf1b',  
'Mis18bp1',  
'Gdi2',  
'Sdhaf2',  
'Ect2',  
'Dut',  
'Mmd',  
'Mettl9',  
'Ggh',  
'Flnc',  
'Fbxo5',  
'Anp32b',  
'Trir',

'A430005L14Rik',  
'Gapdh',  
'Srsf1',  
'Prim1',  
'Lsm3',  
'Rfc5',  
'Taldo1',  
'Psmc3',  
'Arf5',  
'Cox8a',  
'Snrnp25',  
'Pcna',  
'Ddah2',  
'Rap2b',  
'Kif15',  
'Dctpp1',  
'Snai2',  
'Sec61g',  
'Zfp608',  
'Ezh2',  
'Frrs11',  
'Lsm2',  
'Oxct1',  
'Cox20',  
'Dlgap5',  
'Hoxd9',  
'Hnrnpc',  
'Phf5a',  
'Tpm3',  
'Psmc6',  
'Map1b',  
'Ftl1',  
'Chtop',  
'Ssb',  
'Htr1b',  
'Hells',  
'Cyp26b1',  
'Arhgef7',  
'Ola1',  
'Slc25a24',  
'Ndufa4',  
'Tpm1',  
'Prelid1',  
'Gins2',  
'Mrpl42',  
'Cenpw',  
'Ssrp1',

'Rhoa',  
'Anln',  
'Msrb2',  
'G3bp1',  
'Bccip',  
'Sapcd1',  
'Chchd1',  
'Sarnp',  
'Psrc1',  
'Trim59',  
'Ndufb7',  
'Gpc6',  
'Snrpa1',  
'Lsm8',  
'Dynlrb1',  
'Smad1',  
'Mrps14',  
'Psm2',  
'C530008M17Rik',  
'Crabp1',  
'Xylt1',  
'Cep55',  
'Cdca2',  
'Dgcr6',  
'Prmt1',  
'Rgma',  
'Pa2g4',  
'Vax2os',  
'Kpna2',  
'Pall1',  
'Ap2s1',  
'Ube2t',  
'Cdc25b',  
'Lrrc10b',  
'Nap1l1',  
'Dynlt1f',  
'Dpy30',  
'Emilin3',  
'St8sia2',  
'Fbxo17',  
'Nhp2',  
'Usp1',  
'Ndufb10',  
'Fbn2',  
'Bax',  
'Cd34',  
'Ap2m1',

'Cdc45',  
'Pkmyt1',  
'Cwc15',  
'Ndufs6',  
'Ivns1abp',  
'Cthrc1',  
'Wdr1',  
'Tedc1',  
'Myof',  
'Orc6',  
'B3glct',  
'Bok',  
'Jpt2',  
'Cenpx',  
'Cfdp1',  
'Dkk3',  
'Psmc4',  
'Nt5dc2',  
'Sdhb',  
'Tomm22',  
'Uqcrq',  
'Prpf19',  
'Rfc3',  
'Ndufaf2',  
'Fkbp2',  
'Psmal1',  
'Mrpl17',  
'Hnrnpd',  
'Pin1',  
'Tfdp1',  
'Ndufa1',  
'Psmc1',  
'Chd3os',  
'Prss35',  
'Eif3h',  
'Pid1',  
'Eri1',  
'Atp5j',  
'Dscam',  
'Gpx8',  
'Cdca4',  
'Reep5',  
'Hist1hle',  
'Cnnm1',  
'Ubl4a',  
'Timm50',  
'Haus1',

'Spsb2',  
'Sf3b2',  
'Smc6',  
'Dsccl1',  
'Mgst3',  
'Atp5f1',  
'4930511E03Rik',  
'Psm3',  
'Rbm8a',  
'Fkbp1a',  
'Hnrnpu',  
'Mme',  
'Shisa2',  
'Prim2',  
'Psat1',  
'Psm8',  
'Lrr1',  
'Trim36',  
'Atp6v1g1',  
'Ckap5',  
'Haus8',  
'Vrk1',  
'Ash2l',  
'Cenpu',  
'Mrpl18',  
'Tsn',  
'Trip13',  
'Tmtc2',  
'Ddx39',  
'1700025G04Rik',  
'Lrrfip2',  
'Dusp3',  
'Nav1',  
'Tubg1',  
'Slain1',  
'Slc48a1',  
'Bud31',  
'Cops6',  
'Hprt',  
'Nek2',  
'Ch25h',  
'Rpa2',  
'Impdh2',  
'Papola',  
'Uqcc2',  
'Mrpl28',  
'Fabp5',

'Mthfd2',  
'Wif1',  
'Arl6ip1',  
'Smim5',  
'Vps36',  
'Fh1',  
'Znhit1',  
'Hist1h3c',  
'Amotl2',  
'Cmtm7',  
'Phgdh',  
'Pomp',  
'Map4',  
'Cald1',  
'Dnajc8',  
'Snx8',  
'Cdh11',  
'Gtdc1',  
'Itpa',  
'Col8a1',  
'Pgm5',  
'Tcf12',  
'Exosc8',  
'Gja1',  
'Lrig1',  
'Tbcb',  
'Anapc5',  
'Samm50',  
'Nsmce2',  
'Cntn4',  
'Mtus1',  
'Pdia5',  
'Rwdd1',  
'Ddx41',  
'Prr11',  
'Higd1a',  
'Lims1',  
'Atp5a1',  
'Prdx4',  
'Snrpd3',  
'Mis18a',  
'Hnrnpr',  
'Tpr',  
'Cycs',  
'2010107E04Rik',  
'Bean1',  
'Rex1bd',



'Tomm7',  
'Rpl8',  
'Anapc11',  
'Vax2',  
'Ndufb11',  
'Cox5b',  
'Anapc13',  
'Bcl2l12',  
'Cox5a',  
'Nans',  
'Rad21',  
'Gusb',  
'Calm3',  
'Pmaip1',  
'Cdkn2d',  
'Smc1a',  
'Prpf31',  
'Ska3',  
'Haspin',  
'Aspm',  
'Chchd2',  
'Mycn',  
'Abhd6',  
'Actl6a',  
'Npdc1',  
'Ehd4',  
'Psmc2',  
'Actr3',  
'Ackr3',  
'E2f8',  
'Arhgef39',  
'Tiparp',  
'Ndufs4',  
'Rspo3',  
'Snrnp40',  
'Mif',  
'Pkm',  
'Vdac3',  
'Rpl13a',  
'Pde1b',  
'D8Ertd738e',  
'Sf3a1',  
'Sugt1',  
'Arf1',  
'Ndufs8',  
'Sdc2',  
'Hist1h4i',

'Nuggc',  
'Epc1',  
'Tgfbi',  
'Eloc',  
'Hikeshi',  
'Csnk2b',  
'R3hdm4',  
'Cep89',  
'Eif4h',  
'Slirp',  
'Eif4a3',  
'Hjurp',  
'Eif1ad',  
'Ube2d3',  
'Csnk1a1',  
'Tagln2',  
'Plk4',  
'Nudt19',  
'Dcakd',  
'Selenow',  
'Ncapd3',  
'1500009L16Rik',  
'Smim10l2a',  
'Aimp1',  
'Hdac1',  
'Stard7',  
'Atox1',  
'Pola2',  
'Myh10',  
'Atp5b',  
'Ttk',  
'Uqcr11',  
'Galk1',  
'Plekha1',  
'Impa1',  
'Blvra',  
'Rab16',  
'Snx7',  
'Slc35b1',  
'Kcnab2',  
'Smarcb1',  
'Anxa1',  
'Fam126b',  
'Cyp27a1',  
'Pdlim1',  
'Mid1ip1',  
'Tpbg',

'Iqgap3',  
'Snf8',  
'Filip1',  
'Ppp2r2c',  
'Clns1a',  
'Olfm1',  
'Hmgn5',  
'Commd10',  
'Gtf3c6',  
'C1d',  
'Asl',  
'Nubp1',  
'U2af1',  
'Atad2',  
'Hnrnpf',  
'Dtymk',  
'Gm17315',  
'Cit',  
'Mmp16',  
'Dnmt1',  
'Mrps21',  
'Ucn2',  
'BC030867',  
'Papss1',  
'Tagln',  
'Arl6ip5',  
'Romo1',  
'Elovl6',  
'Dazap1',  
'Siva1',  
'Stk25',  
'Serp1',  
'Rbm3',  
'Mrpl20',  
'Matr3',  
'Thoc7',  
'Capzb',  
'Acp1',  
'Spata13',  
'Ssna1',  
'Mcm7',  
'5033430I15Rik',  
'Serbp1',  
'Tmed9',  
'Arpc2',  
'Seph1',  
'Rpa1',

'Rps2',  
'Sor11',  
'Fam83d',  
'Mrps25',  
'Gmps',  
'Mrto4',  
'Cplx2',  
'Cct3',  
'Lypd1',  
'E2f1',  
'Epn2',  
'Mlf1',  
'Kifc5b',  
'Mcrip1',  
'Hsbp1',  
'Gm16183',  
'Pole3',  
'St6galnac3',  
'Eme1',  
'Rfc1',  
'Tmem98',  
'Mrpl54',  
'Mdk',  
'Fen1',  
'Commd3',  
'Selenof',  
'Cenpk',  
'Thyn1',  
'Dhfr',  
'Tgfb1',  
'Hnrnph1',  
'Ywhab',  
'Il13ra1',  
'Nde1',  
'Swi5',  
'Myl12a',  
'Cyba',  
'Id1',  
'Nop10',  
'Zranb2',  
'P4ha2',  
'Tuba1c',  
'Ccdc141',  
'Mad1l1',  
'Lta4h',  
'Rps19',  
'Wnt16',

'Hdac2',  
'Nup43',  
'Set',  
'Haus4',  
'Psmc1',  
'Twist1',  
'Cct5',  
'Atp5g3',  
'Trp53bp2',  
'Coro1c',  
'Cdh13',  
'Zmat5',  
'Fam105a',  
'Cbx1',  
'Mybl2',  
'Bora',  
'Ankle1',  
'Coch',  
'Nrtn',  
'Lmf2',  
'Gas1',  
'Tmem123',  
'Skp2',  
'Cdt1',  
'Smc3',  
'Sh3bp4',  
'Ntf3',  
'Fkbp3',  
'Psmc6',  
'Gsdmd',  
'Metap2',  
'Cdc6',  
'Pold2',  
'Gm38037',  
'Troap',  
'Adgrl2',  
'Ppp1r7',  
'Sh3rf3',  
'Gng2',  
'Immp11',  
'Gm10282',  
'Snrpb2',  
'Smyd2',  
'Bzw2',  
'Ddx1',  
'Cisd1',  
'Eif3c',

'Nsl1',  
'E2f7',  
'Ccne2',  
'Rpp251',  
'Dmd',  
'Psm4',  
'Vdac2',  
'Aunip',  
'Exo1',  
'Ndufc1',  
'Hmg20b',  
'Ndufv3',  
'Mis12',  
'Poc1a',  
'Spd11',  
'Wnt11',  
'Uxs1',  
'Hnrnp3',  
'Cetn2',  
'Zwilch',  
'Cby1',  
'Pold1',  
'Me1',  
'Bzw1',  
'G2e3',  
'Rbbp8',  
'Elof1',  
'Neurl1b',  
'Ndufv2',  
'Nxph3',  
'Mrpl52',  
'Trub1',  
'Samd4',  
'Rab1b',  
'Ndufb9',  
'Mrps15',  
'Esp1',  
'Dbp1',  
'Rheb',  
'Tnfrsf12a',  
'Pbdc1',  
'Gnb1',  
'Ppa1',  
'Nono',  
'Sltm',  
'Prkag3',  
'Slc7a2',

'Polr2i',  
'Slco3a1',  
'Cdr2',  
'Uchl5',  
'Actr1a',  
'C1qtnf2',  
'Dpp4',  
'Hlf',  
'Vps13b',  
'Flna',  
'U2surp',  
'Fdps',  
'Ift43',  
'Flot1',  
'C1qtnf1',  
'Nfic',  
'Ralb',  
'Ppib',  
'Mfap2',  
'Zfp367',  
'Cacybp',  
'Fam96a',  
'Fam96b',  
'Psm14',  
'Opn3',  
'Map2k1',  
'Enkd1',  
'Stil',  
'Foxm1',  
'Fundc2',  
'Lima1',  
'Srp14',  
'Rab8b',  
'Gtse1',  
'Tctn3',  
'Gde1',  
'Elovl4',  
'Rpn2',  
'Ncaph2',  
'Psd3',  
'Mrpl51',  
'Snrpc',  
'Gm17018',  
'4930503L19Rik',  
'Rcc1',  
'Psm2',  
'Ryr3',

```
'Sf3a2',  
'Mrps11',  
'E330013P04Rik',  
'Sfxn3',  
...]
```

```
[255]: pap = sc.queries.enrich(list(sig_genes[sig_genes.group=='Papillary'].names.  
    ↪ values), org='mmusculus', gprofiler_kwargs={'all_results':True, 'sources':  
    ↪ ['GO:BP']})
```

```
[256]: ret = sc.queries.enrich(list(sig_genes[sig_genes.group=='Reticular'].names.  
    ↪ values), org='mmusculus', gprofiler_kwargs={'all_results':True, 'sources':  
    ↪ ['GO:BP']})  
preadipo = sc.queries.enrich(list(sig_genes[sig_genes.group=='Preadipocyte'].  
    ↪ names.values), org='mmusculus', gprofiler_kwargs={'all_results':True,   
    ↪ 'sources': ['GO:BP']})  
adipo = sc.queries.enrich(list(sig_genes[sig_genes.group=='Adipocyte'].names.  
    ↪ values), org='mmusculus', gprofiler_kwargs={'all_results':True, 'sources':  
    ↪ ['GO:BP']})
```

```
[257]: pap.to_csv('csv/pap.csv')  
ret.to_csv('csv/ret.csv')  
preadipo.to_csv('csv/preadipo.csv')  
adipo.to_csv('csv/adipo.csv')
```

```
[ ]:
```
