# Supplementary material for: Role of distinct fibroblast lineages and immune cells in dermal repair following UV radiation-induced tissue damage
Source: eLife journal article supplement (doi:10.7554/elife.71052), 2021-12-23
Supplement: supp [file Figure S2B - GO enrichment analysis P2 mouse dermis.xlsx]

## Sheet: Summary
		Summary of selected GO terms (p-value log10) from neonatal mouse skin fibroblasts P2
		Pap Fbs	Ret Fbs	PreA	Adipocytes
	regulation of apoptotic process	3.07	7.82	19.57	8.29
	response to oxidative stress	0	0.93	9.76	9.44
	response to stress	2.94	5.23	30.88	4.09
	cellular response to stress	27.91	3.87	15.86	3.96
	double-strand break repair	12.18	0	0	0
	DNA repair	29.09	0	0	0
	DNA damage response, signal transduction by p53 class mediator	0.56	0	0	0
	signal transduction in response to DNA damage	2.98	0	0	0
	cellular response to DNA damage stimulus	32.58	0	0	0
	cellular response to UV	0	0	0	0
	response to UV	1.15	0	0	0

## Sheet: pap
	source	native	name	p_value	significant	description	term_size	query_size	intersection_size	effective_domain_size	precision	recall	query	parents
0	GO:BP	GO:0006996	organelle organization	4.1294e-94	TRUE	"A process that is carried out at the cellular level which results in the assembly, arrangement of constituent parts, or disassembly of an organelle within a cell. An organelle is an organized structure of distinctive morphology and function. Includes the nucleus, mitochondria, plastids, vacuoles, vesicles, ribosomes and the cytoskeleton. Excludes the plasma membrane." [GOC:mah]	3798	2557	870	21118	0.340242	0.229068	query_1	['GO:0016043']
1	GO:BP	GO:0071840	cellular component organization or biogenesis	1.08946e-92	TRUE	"A process that results in the biosynthesis of constituent macromolecules, assembly, arrangement of constituent parts, or disassembly of a cellular component." [GOC:mah]	6270	2557	1226	21118	0.479468	0.195534	query_1	['GO:0009987']
2	GO:BP	GO:0016043	cellular component organization	3.86298e-87	TRUE	"A process that results in the assembly, arrangement of constituent parts, or disassembly of a cellular component." [GOC:ai, GOC:jl, GOC:mah]	6090	2557	1187	21118	0.464216	0.19491	query_1	['GO:0071840']
3	GO:BP	GO:0007049	cell cycle	6.55616e-72	TRUE	"The progression of biochemical and morphological phases and events that occur in a cell during successive cell replication or nuclear replication events. Canonically, the cell cycle comprises the replication and segregation of genetic material followed by the division of the cell, but in endocycles or syncytial cells nuclear replication or nuclear division may not be followed by cell division." …	1657	2557	464	21118	0.181463	0.280024	query_1	['GO:0009987']
4	GO:BP	GO:0044237	cellular metabolic process	8.16724e-69	TRUE	"The chemical reactions and pathways by which individual cells transform chemical substances." [GOC:go_curators]	10350	2557	1676	21118	0.655456	0.161932	query_1	['GO:0008152', 'GO:0009987']
5	GO:BP	GO:0022402	cell cycle process	7.13846e-66	TRUE	"The cellular process that ensures successive accurate and complete genome replication and chromosome segregation." [GOC:isa_complete, GOC:mtg_cell_cycle]	1082	2557	343	21118	0.134142	0.317006	query_1	['GO:0007049', 'GO:0009987']
6	GO:BP	GO:0000278	mitotic cell cycle	2.58381e-64	TRUE	"Progression through the phases of the mitotic cell cycle, the most common eukaryotic cell cycle, which canonically comprises four successive phases called G1, S, G2, and M and includes replication of the genome and the subsequent segregation of chromosomes into daughter cells. In some variant cell cycles nuclear replication or nuclear division may not be followed by cell division, or G1 and G2 p…	819	2557	286	21118	0.11185	0.349206	query_1	['GO:0007049']
7	GO:BP	GO:0044085	cellular component biogenesis	1.13131e-63	TRUE	"A process that results in the biosynthesis of constituent macromolecules, assembly, and arrangement of constituent parts of a cellular component. Includes biosynthesis of constituent macromolecules, and those macromolecular modifications that are involved in synthesis or assembly of the cellular component." [GOC:jl, GOC:mah]	2974	2557	668	21118	0.261244	0.224613	query_1	['GO:0071840']
8	GO:BP	GO:1903047	mitotic cell cycle process	9.17933e-59	TRUE	"A process that is part of the mitotic cell cycle." [GO_REF:0000060, GOC:mtg_cell_cycle, GOC:TermGenie]	666	2557	244	21118	0.0954243	0.366366	query_1	['GO:0000278', 'GO:0022402']
9	GO:BP	GO:0022607	cellular component assembly	2.59622e-56	TRUE	"The aggregation, arrangement and bonding together of a cellular component." [GOC:isa_complete]	2739	2557	612	21118	0.239343	0.223439	query_1	['GO:0016043', 'GO:0044085']
10	GO:BP	GO:0051276	chromosome organization	3.08517e-54	TRUE	"A process that is carried out at the cellular level that results in the assembly, arrangement of constituent parts, or disassembly of chromosomes, structures composed of a very long molecule of DNA and associated proteins that carries hereditary information. This term covers covalent modifications at the molecular level as well as spatial relationships among the major components of a chromosome.…	1182	2557	341	21118	0.133359	0.288494	query_1	['GO:0006996']
11	GO:BP	GO:0051301	cell division	6.09419e-54	TRUE	"The process resulting in division and partitioning of components of a cell to form more cells; may or may not be accompanied by the physical separation of a cell into distinct, individually membrane-bounded daughter cells." [GOC:di, GOC:go_curators, GOC:pr]	578	2557	217	21118	0.0848651	0.375433	query_1	['GO:0009987']
12	GO:BP	GO:0006807	nitrogen compound metabolic process	1.78246e-51	TRUE	"The chemical reactions and pathways involving organic or inorganic compounds that contain nitrogen." [GOC:jl, ISBN:0198506732]	9669	2557	1539	21118	0.601877	0.159168	query_1	['GO:0008152']
13	GO:BP	GO:0007059	chromosome segregation	2.43189e-51	TRUE	"The process in which genetic material, in the form of chromosomes, is organized into specific structures and then physically separated and apportioned to two or more sets. In eukaryotes, chromosome segregation begins with the condensation of chromosomes, includes chromosome separation, and ends when chromosomes have completed movement to the spindle poles." [GOC:jl, GOC:mah, GOC:mtg_cell_cycle, …	329	2557	153	21118	0.0598357	0.465046	query_1	['GO:0009987']
14	GO:BP	GO:0034641	cellular nitrogen compound metabolic process	4.63165e-51	TRUE	"The chemical reactions and pathways involving various organic and inorganic nitrogenous compounds, as carried out by individual cells." [GOC:mah]	6201	2557	1096	21118	0.428627	0.176746	query_1	['GO:0006807', 'GO:0044237']
15	GO:BP	GO:0008152	metabolic process	1.38621e-50	TRUE	"The chemical reactions and pathways, including anabolism and catabolism, by which living organisms transform chemical substances. Metabolic processes typically transform small molecules, but also include macromolecular processes such as DNA repair and replication, and protein synthesis and degradation." [GOC:go_curators, ISBN:0198547684]	11429	2557	1744	21118	0.682049	0.152594	query_1	['GO:0008150']
16	GO:BP	GO:0043933	protein-containing complex subunit organization	1.64423e-49	TRUE	"Any process in which macromolecules aggregate, disaggregate, or are modified, resulting in the formation, disassembly, or alteration of a protein complex." [GOC:mah]	1636	2557	413	21118	0.161517	0.252445	query_1	['GO:0016043']
17	GO:BP	GO:0034622	cellular protein-containing complex assembly	2.40564e-49	TRUE	"The aggregation, arrangement and bonding together of a set of components to form a protein complex, occurring at the level of an individual cell." [GOC:jl]	996	2557	296	21118	0.115761	0.297189	query_1	['GO:0065003']
18	GO:BP	GO:0044238	primary metabolic process	1.27911e-48	TRUE	"The chemical reactions and pathways involving those compounds which are formed as a part of the normal anabolic and catabolic processes. These processes take place in most, if not all, cells of the organism." [GOC:go_curators, http://www.metacyc.org]	10243	2557	1598	21118	0.624951	0.156009	query_1	['GO:0008152']
19	GO:BP	GO:0065003	protein-containing complex assembly	1.33092e-46	TRUE	"The aggregation, arrangement and bonding together of a set of macromolecules to form a protein-containing complex." [GOC:jl]	1462	2557	376	21118	0.147047	0.257182	query_1	['GO:0022607', 'GO:0043933']
20	GO:BP	GO:0043170	macromolecule metabolic process	6.47212e-45	TRUE	"The chemical reactions and pathways involving macromolecules, any molecule of high relative molecular mass, the structure of which essentially comprises the multiple repetition of units derived, actually or conceptually, from molecules of low relative molecular mass." [GOC:mah]	9484	2557	1493	21118	0.583887	0.157423	query_1	['GO:0071704']
21	GO:BP	GO:0071704	organic substance metabolic process	4.8396e-43	TRUE	"The chemical reactions and pathways involving an organic substance, any molecular entity containing carbon." [GOC:mah]	10989	2557	1666	21118	0.651545	0.151606	query_1	['GO:0008152']
22	GO:BP	GO:0140014	mitotic nuclear division	7.78365e-43	TRUE	"A mitotic cell cycle process comprising the steps by which the nucleus of a eukaryotic cell divides; the process involves condensation of chromosomal DNA into a highly compacted form. Canonically, mitosis produces two daughter nuclei whose chromosome complement is identical to that of the mother cell." [ISBN:0198547684]	270	2557	127	21118	0.0496676	0.47037	query_1	['GO:0000280', 'GO:1903047']
23	GO:BP	GO:0000819	sister chromatid segregation	4.48044e-41	TRUE	"The cell cycle process in which sister chromatids are organized and then physically separated and apportioned to two or more sets." [GOC:ai, GOC:elh]	185	2557	101	21118	0.0394994	0.545946	query_1	['GO:0051276', 'GO:0098813']
24	GO:BP	GO:0044260	cellular macromolecule metabolic process	1.67641e-40	TRUE	"The chemical reactions and pathways involving macromolecules, any molecule of high relative molecular mass, the structure of which essentially comprises the multiple repetition of units derived, actually or conceptually, from molecules of low relative molecular mass, as carried out by individual cells." [GOC:mah]	7962	2557	1287	21118	0.503324	0.161643	query_1	['GO:0043170', 'GO:0044237']
25	GO:BP	GO:0000280	nuclear division	2.75772e-40	TRUE	"The division of a cell nucleus into two nuclei, with DNA and other nuclear contents distributed between the daughter nuclei." [GOC:mah]	426	2557	162	21118	0.0633555	0.380282	query_1	['GO:0048285']
26	GO:BP	GO:0009987	cellular process	9.95987e-40	TRUE	"Any process that is carried out at the cellular level, but not necessarily restricted to a single cell. For example, cell communication occurs among more than one cell, but occurs at the cellular level." [GOC:go_curators, GOC:isa_complete]	17828	2557	2376	21118	0.929214	0.133274	query_1	['GO:0008150']
27	GO:BP	GO:0000070	mitotic sister chromatid segregation	1.00682e-39	TRUE	"The cell cycle process in which replicated homologous chromosomes are organized and then physically separated and apportioned to two sets during the mitotic cell cycle. Each replicated chromosome, composed of two sister chromatids, aligns at the cell equator, paired with its homologous partner. One homolog of each morphologic type goes into each of the resulting chromosome sets." [GOC:ai, GOC:jl]	157	2557	91	21118	0.0355886	0.579618	query_1	['GO:0000819', 'GO:0140014', 'GO:1903047']
28	GO:BP	GO:0098813	nuclear chromosome segregation	1.431e-39	TRUE	"The process in which genetic material, in the form of nuclear chromosomes, is organized into specific structures and then physically separated and apportioned to two or more sets. Nuclear chromosome segregation begins with the condensation of chromosomes, includes chromosome separation, and ends when chromosomes have completed movement to the spindle poles." [GOC:dos]	270	2557	123	21118	0.0481032	0.455556	query_1	['GO:0007059', 'GO:0022402']
29	GO:BP	GO:0006139	nucleobase-containing compound metabolic process	1.45238e-37	TRUE	"Any cellular metabolic process involving nucleobases, nucleosides, nucleotides and nucleic acids." [GOC:ai]	5416	2557	942	21118	0.3684	0.173929	query_1	['GO:0006725', 'GO:0034641', 'GO:0044238', 'GO:0046483', 'GO:1901360']
30	GO:BP	GO:0006259	DNA metabolic process	2.94084e-37	TRUE	"Any cellular metabolic process involving deoxyribonucleic acid. This is one of the two main types of nucleic acid, consisting of a long, unbranched macromolecule formed from one, or more commonly, two, strands of linked deoxyribonucleotides." [ISBN:0198506732]	843	2557	243	21118	0.0950332	0.288256	query_1	['GO:0044260', 'GO:0090304']
31	GO:BP	GO:0046483	heterocycle metabolic process	9.60814e-37	TRUE	"The chemical reactions and pathways involving heterocyclic compounds, those with a cyclic molecular structure and at least two different atoms in the ring (or rings)." [ISBN:0198506732]	5535	2557	955	21118	0.373485	0.172538	query_1	['GO:0044237']
32	GO:BP	GO:0006725	cellular aromatic compound metabolic process	1.08452e-36	TRUE	"The chemical reactions and pathways involving aromatic compounds, any organic compound characterized by one or more planar rings, each of which contains conjugated double bonds and delocalized pi electrons, as carried out by individual cells." [GOC:ai, ISBN:0198506732]	5618	2557	966	21118	0.377786	0.171947	query_1	['GO:0044237']
33	GO:BP	GO:1901360	organic cyclic compound metabolic process	7.8455e-36	TRUE	"The chemical reactions and pathways involving organic cyclic compound." [GOC:TermGenie]	5829	2557	991	21118	0.387564	0.170012	query_1	['GO:0071704']
34	GO:BP	GO:0033043	regulation of organelle organization	2.89899e-35	TRUE	"Any process that modulates the frequency, rate or extent of a process involved in the formation, arrangement of constituent parts, or disassembly of an organelle." [GOC:mah]	1178	2557	300	21118	0.117325	0.254669	query_1	['GO:0006996', 'GO:0051128']
35	GO:BP	GO:0048285	organelle fission	6.00244e-35	TRUE	"The creation of two or more organelles by division of one organelle." [GOC:jid]	477	2557	165	21118	0.0645287	0.345912	query_1	['GO:0006996']
36	GO:BP	GO:0090304	nucleic acid metabolic process	6.9443e-34	TRUE	"Any cellular metabolic process involving nucleic acids." [GOC:dph, GOC:tb]	4962	2557	866	21118	0.338678	0.174526	query_1	['GO:0006139', 'GO:0043170']
37	GO:BP	GO:0006974	cellular response to DNA damage stimulus	2.64462e-33	TRUE	"Any process that results in a change in state or activity of a cell (in terms of movement, secretion, enzyme production, gene expression, etc.) as a result of a stimulus indicating damage to its DNA from environmental insults or errors during metabolism." [GOC:go_curators]	759	2557	219	21118	0.0856472	0.288538	query_1	['GO:0033554']
38	GO:BP	GO:0051726	regulation of cell cycle	2.54677e-32	TRUE	"Any process that modulates the rate or extent of progression through the cell cycle." [GOC:ai, GOC:dph, GOC:tb]	898	2557	243	21118	0.0950332	0.270601	query_1	['GO:0007049', 'GO:0050794']
39	GO:BP	GO:0051128	regulation of cellular component organization	3.51164e-32	TRUE	"Any process that modulates the frequency, rate or extent of a process involved in the formation, arrangement of constituent parts, or disassembly of cell structures, including the plasma membrane and any external encapsulating structures such as the cell wall and cell envelope." [GOC:ai]	2428	2557	495	21118	0.193586	0.203871	query_1	['GO:0016043', 'GO:0050794']
40	GO:BP	GO:0010564	regulation of cell cycle process	6.48801e-32	TRUE	"Any process that modulates a cellular process that is involved in the progression of biochemical and morphological phases and events that occur in a cell during successive cell replication or nuclear replication events." [GOC:dph, GOC:tb]	599	2557	185	21118	0.0723504	0.308848	query_1	['GO:0022402', 'GO:0051726']
41	GO:BP	GO:0016071	mRNA metabolic process	3.70286e-31	TRUE	"The chemical reactions and pathways involving mRNA, messenger RNA, which is responsible for carrying the coded genetic 'message', transcribed from DNA, to sites of protein assembly at the ribosomes." [ISBN:0198506732]	662	2557	196	21118	0.0766523	0.296073	query_1	['GO:0016070']
42	GO:BP	GO:0006396	RNA processing	5.29933e-31	TRUE	"Any process involved in the conversion of one or more primary RNA transcripts into one or more mature RNA molecules." [GOC:mah]	881	2557	237	21118	0.0926867	0.269012	query_1	['GO:0010467', 'GO:0016070']
43	GO:BP	GO:0008380	RNA splicing	6.41965e-31	TRUE	"The process of removing sections of the primary RNA transcript to remove sequences not present in the mature form of the RNA and joining the remaining sections to form the mature form of the RNA." [GOC:krc, GOC:mah]	406	2557	143	21118	0.0559249	0.352217	query_1	['GO:0006396']
44	GO:BP	GO:0000226	microtubule cytoskeleton organization	1.89089e-30	TRUE	"A process that is carried out at the cellular level which results in the assembly, arrangement of constituent parts, or disassembly of cytoskeletal structures comprising microtubules and their associated proteins." [GOC:mah]	618	2557	186	21118	0.0727415	0.300971	query_1	['GO:0007010', 'GO:0007017']
45	GO:BP	GO:0044267	cellular protein metabolic process	2.24359e-30	TRUE	"The chemical reactions and pathways involving a specific protein, rather than of proteins in general, occurring at the level of an individual cell. Includes cellular protein modification." [GOC:jl]	4815	2557	832	21118	0.325381	0.172793	query_1	['GO:0019538', 'GO:0044260']
46	GO:BP	GO:0006397	mRNA processing	6.8907e-30	TRUE	"Any process involved in the conversion of a primary mRNA transcript into one or more mature mRNA(s) prior to translation into polypeptide." [GOC:mah]	475	2557	156	21118	0.061009	0.328421	query_1	['GO:0006396', 'GO:0016071']
47	GO:BP	GO:0006281	DNA repair	8.0587e-30	TRUE	"The process of restoring DNA after damage. Genomes are subject to damage by chemical and physical agents in the environment (e.g. UV and ionizing radiations, chemical mutagens, fungal and bacterial toxins, etc.) and by free radicals or alkylating agents endogenously generated in metabolism. DNA is also damaged because of errors during its replication. A variety of different DNA repair pathways h…	490	2557	159	21118	0.0621822	0.32449	query_1	['GO:0006259', 'GO:0006974']
48	GO:BP	GO:0007010	cytoskeleton organization	9.06138e-29	TRUE	"A process that is carried out at the cellular level which results in the assembly, arrangement of constituent parts, or disassembly of cytoskeletal structures." [GOC:dph, GOC:jl, GOC:mah]	1390	2557	320	21118	0.125147	0.230216	query_1	['GO:0006996']
49	GO:BP	GO:0051641	cellular localization	1.09721e-28	TRUE	"A cellular localization process whereby a substance or cellular entity, such as a protein complex or organelle, is transported to, and/or maintained in, a specific location within a cell including the localization of substances or cellular entities to the cell membrane." [GOC:tb, GOC:vw]	2777	2557	536	21118	0.209621	0.193014	query_1	['GO:0009987', 'GO:0051179']
50	GO:BP	GO:0033554	cellular response to stress	1.22337e-28	TRUE	"Any process that results in a change in state or activity of a cell (in terms of movement, secretion, enzyme production, gene expression, etc.) as a result of a stimulus indicating the organism is under stress. The stress is usually, but not necessarily, exogenous (e.g. temperature, humidity, ionizing radiation)." [GOC:mah]	1805	2557	387	21118	0.151349	0.214404	query_1	['GO:0006950', 'GO:0051716']
51	GO:BP	GO:0007017	microtubule-based process	5.75122e-28	TRUE	"Any cellular process that depends upon or alters the microtubule cytoskeleton, that part of the cytoskeleton comprising microtubules and their associated proteins." [GOC:mah]	891	2557	232	21118	0.0907313	0.260382	query_1	['GO:0009987']
52	GO:BP	GO:0000377	RNA splicing, via transesterification reactions with bulged adenosine as nucleophile	8.41387e-27	TRUE	"Splicing of RNA via a series of two transesterification reactions with a bulged adenosine residue from the intron branch point as the initiating nucleophile. When the initial RNA for the splicing reaction is a single molecule (cis splicing), the excised intron is released in a lariat structure." [GOC:krc, PMID:11377794]	292	2557	111	21118	0.0434102	0.380137	query_1	['GO:0000375']
53	GO:BP	GO:0000375	RNA splicing, via transesterification reactions	8.41387e-27	TRUE	"Splicing of RNA via a series of two transesterification reactions." [GOC:krc]	292	2557	111	21118	0.0434102	0.380137	query_1	['GO:0008380']
54	GO:BP	GO:0000398	mRNA splicing, via spliceosome	8.41387e-27	TRUE	"The joining together of exons from one or more primary transcripts of messenger RNA (mRNA) and the excision of intron sequences, via a spliceosomal mechanism, so that mRNA consisting only of the joined exons is produced." [GOC:krc, ISBN:0198506732, ISBN:0879695897]	292	2557	111	21118	0.0434102	0.380137	query_1	['GO:0000377', 'GO:0006397']
55	GO:BP	GO:0006260	DNA replication	1.05947e-26	TRUE	"The cellular metabolic process in which a cell duplicates one or more molecules of DNA. DNA replication begins when specific sequences, known as origins of replication, are recognized and bound by initiation proteins, and ends when the original DNA molecule has been completely duplicated and the copies topologically separated. The unit of replication usually corresponds to the genome of the cell…	246	2557	100	21118	0.0391083	0.406504	query_1	['GO:0034645']
56	GO:BP	GO:0007051	spindle organization	7.6525e-26	TRUE	"A process that is carried out at the cellular level which results in the assembly, arrangement of constituent parts, or disassembly of the spindle, the array of microtubules and associated molecules that forms between opposite poles of a eukaryotic cell during DNA segregation and serves to move the duplicated chromosomes apart." [GOC:go_curators, GOC:mah]	179	2557	82	21118	0.0320688	0.458101	query_1	['GO:0000226', 'GO:0022402']
57	GO:BP	GO:0019538	protein metabolic process	1.15908e-25	TRUE	"The chemical reactions and pathways involving a protein. Includes protein modification." [GOC:ma]	5474	2557	901	21118	0.352366	0.164596	query_1	['GO:0043170', 'GO:0044238', 'GO:1901564']
58	GO:BP	GO:0044249	cellular biosynthetic process	5.38832e-25	TRUE	"The chemical reactions and pathways resulting in the formation of substances, carried out by individual cells." [GOC:jl]	5715	2557	930	21118	0.363707	0.16273	query_1	['GO:0009058', 'GO:0044237']
59	GO:BP	GO:0022613	ribonucleoprotein complex biogenesis	9.83887e-25	TRUE	"A cellular process that results in the biosynthesis of constituent macromolecules, assembly, and arrangement of constituent parts of a complex containing RNA and proteins. Includes the biosynthesis of the constituent RNA and protein molecules, and those macromolecular modifications that are involved in synthesis or assembly of the ribonucleoprotein complex." [GOC:isa_complete, GOC:mah]	413	2557	134	21118	0.0524052	0.324455	query_1	['GO:0044085']
60	GO:BP	GO:1901564	organonitrogen compound metabolic process	1.66598e-24	TRUE	"The chemical reactions and pathways involving organonitrogen compound." [GOC:pr, GOC:TermGenie]	6326	2557	1008	21118	0.394212	0.159342	query_1	['GO:0006807', 'GO:0071704']
61	GO:BP	GO:1901576	organic substance biosynthetic process	3.01754e-24	TRUE	"The chemical reactions and pathways resulting in the formation of an organic substance, any molecular entity containing carbon." [GOC:pr, GOC:TermGenie]	5779	2557	935	21118	0.365663	0.161793	query_1	['GO:0009058', 'GO:0071704']
62	GO:BP	GO:1902850	microtubule cytoskeleton organization involved in mitosis	3.45789e-24	TRUE	"Any microtubule cytoskeleton organization that is involved in mitosis." [GO_REF:0000060, GOC:TermGenie, PMID:18799626]	142	2557	70	21118	0.0273758	0.492958	query_1	['GO:0000226', 'GO:1903047']
63	GO:BP	GO:0009058	biosynthetic process	1.73607e-23	TRUE	"The chemical reactions and pathways resulting in the formation of substances; typically the energy-requiring part of metabolism in which simpler substances are transformed into more complex ones." [GOC:curators, ISBN:0198547684]	5882	2557	945	21118	0.369574	0.16066	query_1	['GO:0008152']
64	GO:BP	GO:0034645	cellular macromolecule biosynthetic process	2.2231e-22	TRUE	"The chemical reactions and pathways resulting in the formation of a macromolecule, any molecule of high relative molecular mass, the structure of which essentially comprises the multiple repetition of units derived, actually or conceptually, from molecules of low relative molecular mass, carried out by individual cells." [GOC:mah]	4744	2557	788	21118	0.308174	0.166105	query_1	['GO:0009059', 'GO:0044249', 'GO:0044260']
65	GO:BP	GO:0048522	positive regulation of cellular process	2.64543e-22	TRUE	"Any process that activates or increases the frequency, rate or extent of a cellular process, any of those that are carried out at the cellular level, but are not necessarily restricted to a single cell. For example, cell communication occurs among more than one cell, but occurs at the cellular level." [GOC:jid]	5796	2557	928	21118	0.362925	0.16011	query_1	['GO:0009987', 'GO:0048518', 'GO:0050794']
66	GO:BP	GO:0009059	macromolecule biosynthetic process	3.92291e-22	TRUE	"The chemical reactions and pathways resulting in the formation of a macromolecule, any molecule of high relative molecular mass, the structure of which essentially comprises the multiple repetition of units derived, actually or conceptually, from molecules of low relative molecular mass." [GOC:mah]	4782	2557	792	21118	0.309738	0.165621	query_1	['GO:0043170', 'GO:1901576']
67	GO:BP	GO:0033365	protein localization to organelle	5.6588e-22	TRUE	"A process in which a protein is transported to, or maintained in, a location within an organelle." [GOC:mah]	859	2557	212	21118	0.0829097	0.246799	query_1	['GO:0034613']
68	GO:BP	GO:0051649	establishment of localization in cell	8.72944e-22	TRUE	"Any process, occuring in a cell, that localizes a substance or cellular component. This may occur via movement, tethering or selective degradation." [GOC:ai, GOC:dos, GOC:dph, GOC:tb]	2031	2557	400	21118	0.156433	0.196947	query_1	['GO:0051234', 'GO:0051641']
69	GO:BP	GO:0070727	cellular macromolecule localization	9.86724e-22	TRUE	"Any process in which a macromolecule is transported to, and/or maintained in, a specific location at the level of a cell. Localization at the cellular level encompasses movement within the cell, from within the cell to the cell surface, or from one location to another at the surface of a cell." [GOC:mah]	1726	2557	353	21118	0.138052	0.204519	query_1	['GO:0033036', 'GO:0051641']
70	GO:BP	GO:0034613	cellular protein localization	1.08418e-21	TRUE	"Any process in which a protein is transported to, and/or maintained in, a specific location at the level of a cell. Localization at the cellular level encompasses movement within the cell, from within the cell to the cell surface, or from one location to another at the surface of a cell." [GOC:mah]	1714	2557	351	21118	0.13727	0.204784	query_1	['GO:0008104', 'GO:0070727']
71	GO:BP	GO:0008104	protein localization	1.61454e-21	TRUE	"Any process in which a protein is transported to, or maintained in, a specific location." [GOC:ai]	2452	2557	462	21118	0.18068	0.188418	query_1	['GO:0033036']
72	GO:BP	GO:0006412	translation	3.76857e-21	TRUE	"The cellular metabolic process in which a protein is formed, using the sequence of a mature mRNA or circRNA molecule to specify the sequence of amino acids in a polypeptide chain. Translation is mediated by the ribosome, and begins with the formation of a ternary complex between aminoacylated initiator methionine tRNA, GTP, and initiation factor 2, which subsequently associates with the small su…	657	2557	174	21118	0.0680485	0.26484	query_1	['GO:0010467', 'GO:0034645', 'GO:0043043', 'GO:0044267']
73	GO:BP	GO:0033036	macromolecule localization	4.80275e-21	TRUE	"Any process in which a macromolecule is transported to, or maintained in, a specific location." [GOC:mah]	2897	2557	525	21118	0.205319	0.181222	query_1	['GO:0051179']
74	GO:BP	GO:0033044	regulation of chromosome organization	7.59787e-21	TRUE	"Any process that modulates the frequency, rate or extent of a process involved in the formation, arrangement of constituent parts, or disassembly of a chromosome." [GOC:mah]	280	2557	99	21118	0.0387172	0.353571	query_1	['GO:0033043', 'GO:0051276']
75	GO:BP	GO:0006119	oxidative phosphorylation	1.77807e-20	TRUE	"The phosphorylation of ADP to ATP that accompanies the oxidation of a metabolite through the operation of the respiratory chain. Oxidation of compounds establishes a proton gradient across the membrane, providing the energy for ATP synthesis." [ISBN:0198506732, ISBN:0471331309]	118	2557	59	21118	0.0230739	0.5	query_1	['GO:0009060', 'GO:0046034']
76	GO:BP	GO:0051656	establishment of organelle localization	4.24864e-20	TRUE	"The directed movement of an organelle to a specific location." [GOC:ai]	386	2557	120	21118	0.04693	0.310881	query_1	['GO:0051234', 'GO:0051640']
77	GO:BP	GO:0043043	peptide biosynthetic process	5.1412e-20	TRUE	"The chemical reactions and pathways resulting in the formation of peptides, compounds of 2 or more (but usually less than 100) amino acids where the alpha carboxyl group of one is bound to the alpha amino group of another. This may include the translation of a precursor protein and its subsequent processing into a functional peptide." [GOC:dph, GOC:jl]	677	2557	175	21118	0.0684396	0.258493	query_1	['GO:0006518', 'GO:0043604', 'GO:1901566']
78	GO:BP	GO:0010467	gene expression	6.68268e-20	TRUE	"The process in which a gene's sequence is converted into a mature gene product or products (proteins or RNA). This includes the production of an RNA transcript as well as any processing to produce a mature RNA product or an mRNA or circRNA (for protein-coding genes) and the translation of that mRNA or circRNA into protein. Protein maturation is included when required to form an active form of a …	5933	2557	934	21118	0.365272	0.157425	query_1	['GO:0043170']
79	GO:BP	GO:0044271	cellular nitrogen compound biosynthetic process	1.11057e-19	TRUE	"The chemical reactions and pathways resulting in the formation of organic and inorganic nitrogenous compounds." [GOC:jl, ISBN:0198506732]	4705	2557	770	21118	0.301134	0.163656	query_1	['GO:0034641', 'GO:0044249']
80	GO:BP	GO:0007098	centrosome cycle	2.2123e-19	TRUE	"The cell cycle process in which centrosome duplication and separation takes place. The centrosome cycle can operate with a considerable degree of independence from other processes of the cell cycle." [ISBN:0815316194]	130	2557	61	21118	0.0238561	0.469231	query_1	['GO:0022402', 'GO:0031023']
81	GO:BP	GO:0006261	DNA-dependent DNA replication	2.5117e-19	TRUE	"A DNA replication process that uses parental DNA as a template for the DNA-dependent DNA polymerases that synthesize the new strands." [GOC:mah, ISBN:0198506732]	134	2557	62	21118	0.0242472	0.462687	query_1	['GO:0006260']
82	GO:BP	GO:0048523	negative regulation of cellular process	3.79321e-19	TRUE	"Any process that stops, prevents, or reduces the frequency, rate or extent of a cellular process, any of those that are carried out at the cellular level, but are not necessarily restricted to a single cell. For example, cell communication occurs among more than one cell, but occurs at the cellular level." [GOC:jid]	5068	2557	816	21118	0.319124	0.16101	query_1	['GO:0009987', 'GO:0048519', 'GO:0050794']
83	GO:BP	GO:0048519	negative regulation of biological process	3.91725e-19	TRUE	"Any process that stops, prevents, or reduces the frequency, rate or extent of a biological process. Biological processes are regulated by many means; examples include the control of gene expression, protein modification or interaction with a protein or substrate molecule." [GOC:jid]	5544	2557	879	21118	0.343762	0.15855	query_1	['GO:0008150', 'GO:0050789']
84	GO:BP	GO:0071826	ribonucleoprotein complex subunit organization	6.5626e-19	TRUE	"Any process in which macromolecules aggregate, disaggregate, or are modified, resulting in the formation, disassembly, or alteration of a ribonucleoprotein complex." [GOC:mah]	188	2557	75	21118	0.0293312	0.398936	query_1	['GO:0043933']
85	GO:BP	GO:0006518	peptide metabolic process	6.66778e-19	TRUE	"The chemical reactions and pathways involving peptides, compounds of two or more amino acids where the alpha carboxyl group of one is bound to the alpha amino group of another." [GOC:go_curators]	835	2557	200	21118	0.0782167	0.239521	query_1	['GO:0043603', 'GO:1901564']
86	GO:BP	GO:0007052	mitotic spindle organization	7.51815e-19	TRUE	"A process that is carried out at the cellular level which results in the assembly, arrangement of constituent parts, or disassembly of the microtubule spindle during a mitotic cell cycle." [GOC:go_curators, GOC:mah]	114	2557	56	21118	0.0219007	0.491228	query_1	['GO:0007051', 'GO:1902850']
87	GO:BP	GO:0044772	mitotic cell cycle phase transition	7.71992e-19	TRUE	"The cell cycle process by which a cell commits to entering the next mitotic cell cycle phase." [GOC:mtg_cell_cycle]	373	2557	115	21118	0.0449746	0.308311	query_1	['GO:0044770', 'GO:1903047']
88	GO:BP	GO:0044770	cell cycle phase transition	9.10531e-19	TRUE	"The cell cycle process by which a cell commits to entering the next cell cycle phase." [GOC:mtg_cell_cycle]	455	2557	131	21118	0.0512319	0.287912	query_1	['GO:0022402']
89	GO:BP	GO:0007346	regulation of mitotic cell cycle	1.11407e-18	TRUE	"Any process that modulates the rate or extent of progress through the mitotic cell cycle." [GOC:dph, GOC:go_curators, GOC:tb]	425	2557	125	21118	0.0488854	0.294118	query_1	['GO:0000278', 'GO:0051726']
90	GO:BP	GO:0022618	ribonucleoprotein complex assembly	1.62318e-18	TRUE	"The aggregation, arrangement and bonding together of proteins and RNA molecules to form a ribonucleoprotein complex." [GOC:jl]	182	2557	73	21118	0.0285491	0.401099	query_1	['GO:0022613', 'GO:0034622', 'GO:0071826']
91	GO:BP	GO:0048518	positive regulation of biological process	2.63566e-18	TRUE	"Any process that activates or increases the frequency, rate or extent of a biological process. Biological processes are regulated by many means; examples include the control of gene expression, protein modification or interaction with a protein or substrate molecule." [GOC:jid]	6305	2557	974	21118	0.380915	0.154481	query_1	['GO:0008150', 'GO:0050789']
92	GO:BP	GO:0071103	DNA conformation change	3.04994e-18	TRUE	"A cellular process that results in a change in the spatial configuration of a DNA molecule. A conformation change can bend DNA, or alter the, twist, writhe, or linking number of a DNA molecule." [GOC:mah]	291	2557	97	21118	0.0379351	0.333333	query_1	['GO:0051276']
93	GO:BP	GO:0046907	intracellular transport	1.24091e-17	TRUE	"The directed movement of substances within a cell." [GOC:ai]	1409	2557	290	21118	0.113414	0.20582	query_1	['GO:0006810', 'GO:0051641', 'GO:0051649']
94	GO:BP	GO:0016070	RNA metabolic process	1.37914e-17	TRUE	"The cellular chemical reactions and pathways involving RNA, ribonucleic acid, one of the two main type of nucleic acid, consisting of a long, unbranched macromolecule formed from ribonucleotides joined in 3',5'-phosphodiester linkage." [ISBN:0198506732]	4470	2557	728	21118	0.284709	0.162864	query_1	['GO:0090304']
95	GO:BP	GO:0050000	chromosome localization	2.31206e-17	TRUE	"Any process in which a chromosome is transported to, or maintained in, a specific location." [GOC:ai]	85	2557	46	21118	0.0179898	0.541176	query_1	['GO:0051640']
96	GO:BP	GO:0045787	positive regulation of cell cycle	2.40708e-17	TRUE	"Any process that activates or increases the rate or extent of progression through the cell cycle." [GOC:go_curators]	313	2557	100	21118	0.0391083	0.319489	query_1	['GO:0007049', 'GO:0048522', 'GO:0051726']
97	GO:BP	GO:0031023	microtubule organizing center organization	2.54759e-17	TRUE	"A process that is carried out at the cellular level which results in the assembly, arrangement of constituent parts, or disassembly of a microtubule organizing center, a structure from which microtubules grow." [GOC:dph, GOC:jl, GOC:mah]	140	2557	61	21118	0.0238561	0.435714	query_1	['GO:0000226', 'GO:0007017', 'GO:0016043']
98	GO:BP	GO:0051303	establishment of chromosome localization	5.52111e-17	TRUE	"The directed movement of a chromosome to a specific location." [GOC:ai]	83	2557	45	21118	0.0175987	0.542169	query_1	['GO:0050000', 'GO:0051649', 'GO:0051656']
99	GO:BP	GO:0051310	metaphase plate congression	6.11171e-17	TRUE	"The alignment of chromosomes at the metaphase plate (spindle equator), a plane halfway between the poles of the spindle." [GOC:ai]	64	2557	39	21118	0.0152522	0.609375	query_1	['GO:0022402', 'GO:0051303', 'GO:0098813']
100	GO:BP	GO:0031323	regulation of cellular metabolic process	1.12715e-16	TRUE	"Any process that modulates the frequency, rate or extent of the chemical reactions and pathways by which individual cells transform chemical substances." [GOC:mah]	6073	2557	935	21118	0.365663	0.15396	query_1	['GO:0019222', 'GO:0044237', 'GO:0050794']
101	GO:BP	GO:0051171	regulation of nitrogen compound metabolic process	1.23313e-16	TRUE	"Any process that modulates the frequency, rate or extent of the chemical reactions and pathways involving nitrogen or nitrogenous compounds." [GOC:ai, GOC:tb]	5706	2557	887	21118	0.346891	0.15545	query_1	['GO:0006807', 'GO:0019222']
102	GO:BP	GO:0051640	organelle localization	1.35108e-16	TRUE	"Any process in which an organelle is transported to, and/or maintained in, a specific location." [GOC:ai]	528	2557	140	21118	0.0547517	0.265152	query_1	['GO:0051641']
103	GO:BP	GO:0043604	amide biosynthetic process	2.42653e-16	TRUE	"The chemical reactions and pathways resulting in the formation of an amide, any derivative of an oxoacid in which an acidic hydroxy group has been replaced by an amino or substituted amino group." [GOC:curators]	793	2557	186	21118	0.0727415	0.234552	query_1	['GO:0043603', 'GO:0044271']
104	GO:BP	GO:0009060	aerobic respiration	3.5387e-16	TRUE	"The enzymatic release of energy from inorganic and organic compounds (especially carbohydrates and fats) which requires oxygen as the terminal electron acceptor." [GOC:das, GOC:jl, ISBN:0140513590]	171	2557	67	21118	0.0262026	0.391813	query_1	['GO:0045333']
105	GO:BP	GO:0090068	positive regulation of cell cycle process	3.86046e-16	TRUE	"Any process that increases the rate, frequency or extent of a cellular process that is involved in the progression of biochemical and morphological phases and events that occur in a cell during successive cell replication or nuclear replication events." [GOC:dph, GOC:tb]	224	2557	79	21118	0.0308956	0.352679	query_1	['GO:0010564', 'GO:0022402', 'GO:0045787']
106	GO:BP	GO:0051173	positive regulation of nitrogen compound metabolic process	1.26624e-15	TRUE	"Any process that activates or increases the frequency, rate or extent of the chemical reactions and pathways involving nitrogen or nitrogenous compounds." [GOC:ai, GOC:tb]	3069	2557	526	21118	0.20571	0.171391	query_1	['GO:0006807', 'GO:0009893', 'GO:0051171']
107	GO:BP	GO:0071824	protein-DNA complex subunit organization	1.36883e-15	TRUE	"Any process in which macromolecules aggregate, disaggregate, or are modified, resulting in the formation, disassembly, or alteration of a protein-DNA complex." [GOC:mah]	219	2557	77	21118	0.0301134	0.351598	query_1	['GO:0043933']
108	GO:BP	GO:1901987	regulation of cell cycle phase transition	1.61229e-15	TRUE	"Any process that modulates the frequency, rate or extent of cell cycle phase transition." [GOC:mtg_cell_cycle, GOC:TermGenie, PMID:22841721]	340	2557	102	21118	0.0398905	0.3	query_1	['GO:0010564', 'GO:0044770']
109	GO:BP	GO:0051246	regulation of protein metabolic process	1.87085e-15	TRUE	"Any process that modulates the frequency, rate or extent of the chemical reactions and pathways involving a protein." [GOC:ai]	2650	2557	466	21118	0.182245	0.175849	query_1	['GO:0019538', 'GO:0051171', 'GO:0060255', 'GO:0080090']
110	GO:BP	GO:0007005	mitochondrion organization	2.20599e-15	TRUE	"A process that is carried out at the cellular level which results in the assembly, arrangement of constituent parts, or disassembly of a mitochondrion; includes mitochondrial morphogenesis and distribution, and replication of the mitochondrial genome as well as synthesis of new mitochondrial components." [GOC:dph, GOC:jl, GOC:mah, GOC:sgd_curators, PMID:9786946]	505	2557	133	21118	0.0520141	0.263366	query_1	['GO:0006996']
111	GO:BP	GO:0051225	spindle assembly	2.22255e-15	TRUE	"The aggregation, arrangement and bonding together of a set of components to form the spindle, the array of microtubules and associated molecules that serves to move duplicated chromosomes apart." [GOC:ai, GOC:expert_rg, GOC:mtg_sensu, GOC:tb]	111	2557	51	21118	0.0199452	0.459459	query_1	['GO:0007051', 'GO:0070925']
112	GO:BP	GO:0080090	regulation of primary metabolic process	2.62251e-15	TRUE	"Any process that modulates the frequency, rate or extent of the chemical reactions and pathways within a cell or an organism involving those compounds formed as a part of the normal anabolic and catabolic processes. These processes take place in most, if not all, cells of the organism." [PMID:19211694]	5886	2557	903	21118	0.353148	0.153415	query_1	['GO:0019222', 'GO:0044238']
113	GO:BP	GO:0031325	positive regulation of cellular metabolic process	4.77927e-15	TRUE	"Any process that activates or increases the frequency, rate or extent of the chemical reactions and pathways by which individual cells transform chemical substances." [GOC:mah]	3275	2557	552	21118	0.215878	0.16855	query_1	['GO:0009893', 'GO:0031323', 'GO:0044237', 'GO:0048522']
114	GO:BP	GO:0006325	chromatin organization	5.1337e-15	TRUE	"Any process that results in the specification, formation or maintenance of the physical structure of eukaryotic chromatin." [GOC:mah, GOC:vw, PMID:20404130]	785	2557	181	21118	0.0707861	0.230573	query_1	['GO:0016043', 'GO:0051276']
115	GO:BP	GO:0010257	NADH dehydrogenase complex assembly	8.44765e-15	TRUE	"The aggregation, arrangement and bonding together of a set of components to form an NADH dehydrogenase complex." [GOC:sm]	58	2557	35	21118	0.0136879	0.603448	query_1	['GO:0034622']
116	GO:BP	GO:0032981	mitochondrial respiratory chain complex I assembly	8.44765e-15	TRUE	"The aggregation, arrangement and bonding together of a set of components to form mitochondrial respiratory chain complex I." [GOC:rph]	58	2557	35	21118	0.0136879	0.603448	query_1	['GO:0010257', 'GO:0033108']
117	GO:BP	GO:1901990	regulation of mitotic cell cycle phase transition	1.42446e-14	TRUE	"Any process that modulates the frequency, rate or extent of mitotic cell cycle phase transition." [GOC:mtg_cell_cycle, GOC:TermGenie, PMID:22841721]	260	2557	84	21118	0.032851	0.323077	query_1	['GO:0007346', 'GO:0044772', 'GO:1901987']
118	GO:BP	GO:0070925	organelle assembly	1.55058e-14	TRUE	"The aggregation, arrangement and bonding together of a set of components to form an organelle. An organelle is an organized structure of distinctive morphology and function. Includes the nucleus, mitochondria, plastids, vacuoles, vesicles, ribosomes and the cytoskeleton. Excludes the plasma membrane." [GOC:mah]	829	2557	187	21118	0.0731326	0.225573	query_1	['GO:0006996', 'GO:0022607']
119	GO:BP	GO:0010948	negative regulation of cell cycle process	1.56347e-14	TRUE	"Any process that decreases the rate, frequency or extent of a cellular process that is involved in the progression of biochemical and morphological phases and events that occur in a cell during successive cell replication or nuclear replication events." [GOC:dph, GOC:tb]	246	2557	81	21118	0.0316777	0.329268	query_1	['GO:0010564', 'GO:0022402', 'GO:0045786']
120	GO:BP	GO:0010638	positive regulation of organelle organization	1.84374e-14	TRUE	"Any process that increases the frequency, rate or extent of a process involved in the formation, arrangement of constituent parts, or disassembly of an organelle." [GOC:dph, GOC:tb]	590	2557	146	21118	0.0570982	0.247458	query_1	['GO:0006996', 'GO:0033043', 'GO:0051130']
121	GO:BP	GO:0046034	ATP metabolic process	1.85548e-14	TRUE	"The chemical reactions and pathways involving ATP, adenosine triphosphate, a universally important coenzyme and enzyme regulator." [GOC:go_curators]	261	2557	84	21118	0.032851	0.321839	query_1	['GO:0008152']
122	GO:BP	GO:0045333	cellular respiration	2.61155e-14	TRUE	"The enzymatic release of energy from inorganic and organic compounds (especially carbohydrates and fats) which either requires oxygen (aerobic respiration) or does not (anaerobic respiration)." [GOC:das, ISBN:0140513590, ISBN:0198506732]	215	2557	74	21118	0.0289402	0.344186	query_1	['GO:0015980']
123	GO:BP	GO:0042773	ATP synthesis coupled electron transport	2.91854e-14	TRUE	"The transfer of electrons through a series of electron donors and acceptors, generating energy that is ultimately used for synthesis of ATP." [ISBN:0716731363]	66	2557	37	21118	0.0144701	0.560606	query_1	['GO:0006119', 'GO:0022904']
124	GO:BP	GO:0051306	mitotic sister chromatid separation	3.4248e-14	TRUE	"The process in which sister chromatids are physically detached from each other during mitosis." [GOC:ai]	63	2557	36	21118	0.014079	0.571429	query_1	['GO:0000070', 'GO:0051304', 'GO:1903047']
125	GO:BP	GO:0042775	mitochondrial ATP synthesis coupled electron transport	3.4248e-14	TRUE	"The transfer of electrons through a series of electron donors and acceptors, generating energy that is ultimately used for synthesis of ATP, as it occurs in the mitochondrial inner membrane or chloroplast thylakoid membrane." [GOC:mtg_sensu, ISBN:0716731363]	63	2557	36	21118	0.014079	0.571429	query_1	['GO:0042773']
126	GO:BP	GO:0022900	electron transport chain	5.15224e-14	TRUE	"A process in which a series of electron carriers operate together to transfer electrons from donors to any of several different terminal electron acceptors to generate a transmembrane electrochemical gradient." [GOC:mtg_electron_transport]	138	2557	56	21118	0.0219007	0.405797	query_1	['GO:0006091']
127	GO:BP	GO:0065004	protein-DNA complex assembly	7.31043e-14	TRUE	"The aggregation, arrangement and bonding together of proteins and DNA molecules to form a protein-DNA complex." [GOC:jl]	182	2557	66	21118	0.0258115	0.362637	query_1	['GO:0034622', 'GO:0071824']
128	GO:BP	GO:0045786	negative regulation of cell cycle	1.29923e-13	TRUE	"Any process that stops, prevents or reduces the rate or extent of progression through the cell cycle." [GOC:dph, GOC:go_curators, GOC:tb]	334	2557	97	21118	0.0379351	0.290419	query_1	['GO:0007049', 'GO:0048523', 'GO:0051726']
129	GO:BP	GO:0032268	regulation of cellular protein metabolic process	1.90979e-13	TRUE	"Any process that modulates the frequency, rate or extent of the chemical reactions and pathways involving a protein, occurring at the level of an individual cell." [GOC:mah]	2482	2557	433	21118	0.169339	0.174456	query_1	['GO:0031323', 'GO:0044267', 'GO:0051246']
130	GO:BP	GO:0051304	chromosome separation	2.23713e-13	TRUE	"The cell cycle process in which paired chromosomes are detached from each other. Chromosome separation begins with the release of cohesin complexes from chromosomes; in budding yeast, this includes the cleavage of cohesin complexes along the chromosome arms, followed by the separation of the centromeric regions. Chromosome separation also includes formation of chromatid axes mediated by condensi…	94	2557	44	21118	0.0172077	0.468085	query_1	['GO:0007059', 'GO:0022402']
131	GO:BP	GO:0019222	regulation of metabolic process	2.3601e-13	TRUE	"Any process that modulates the frequency, rate or extent of the chemical reactions and pathways within a cell or an organism." [GOC:go_curators]	6841	2557	1014	21118	0.396558	0.148224	query_1	['GO:0008152', 'GO:0050789']
132	GO:BP	GO:0007093	mitotic cell cycle checkpoint signaling	4.83351e-13	TRUE	"A signaling process that ensures accurate chromosome replication and segregation by preventing progression through a mitotic cell cycle until conditions are suitable for the cell to proceed to the next stage." [GOC:mtg_cell_cycle]	115	2557	49	21118	0.0191631	0.426087	query_1	['GO:0000075', 'GO:0045930', 'GO:1903047']
133	GO:BP	GO:0007080	mitotic metaphase plate congression	5.32423e-13	TRUE	"The cell cycle process in which chromosomes are aligned at the metaphase plate, a plane halfway between the poles of the mitotic spindle, during mitosis." [GOC:mah, ISBN:0815316194]	48	2557	30	21118	0.0117325	0.625	query_1	['GO:0000070', 'GO:0051310', 'GO:1903047']
134	GO:BP	GO:0034502	protein localization to chromosome	5.35013e-13	TRUE	"Any process in which a protein is transported to, or maintained at, a specific location on a chromosome." [GOC:mah]	92	2557	43	21118	0.0168166	0.467391	query_1	['GO:0033365']
135	GO:BP	GO:0006302	double-strand break repair	6.61812e-13	TRUE	"The repair of double-strand breaks in DNA via homologous and nonhomologous mechanisms to reform a continuous DNA helix." [GOC:elh]	236	2557	76	21118	0.0297223	0.322034	query_1	['GO:0006281']
136	GO:BP	GO:0051130	positive regulation of cellular component organization	7.95272e-13	TRUE	"Any process that activates or increases the frequency, rate or extent of a process involved in the formation, arrangement of constituent parts, or disassembly of cell structures, including the plasma membrane and any external encapsulating structures such as the cell wall and cell envelope." [GOC:ai]	1200	2557	241	21118	0.0942511	0.200833	query_1	['GO:0016043', 'GO:0048522', 'GO:0051128']
137	GO:BP	GO:0010604	positive regulation of macromolecule metabolic process	8.85916e-13	TRUE	"Any process that increases the frequency, rate or extent of the chemical reactions and pathways involving macromolecules, any molecule of high relative molecular mass, the structure of which essentially comprises the multiple repetition of units derived, actually or conceptually, from molecules of low relative molecular mass." [GOC:dph, GOC:tb]	3467	2557	567	21118	0.221744	0.163542	query_1	['GO:0009893', 'GO:0043170', 'GO:0060255']
138	GO:BP	GO:0009893	positive regulation of metabolic process	1.29859e-12	TRUE	"Any process that activates or increases the frequency, rate or extent of the chemical reactions and pathways within a cell or an organism." [GOC:go_curators]	3760	2557	606	21118	0.236996	0.16117	query_1	['GO:0008152', 'GO:0019222', 'GO:0048518']
139	GO:BP	GO:0051052	regulation of DNA metabolic process	1.30546e-12	TRUE	"Any process that modulates the frequency, rate or extent of the chemical reactions and pathways involving DNA." [GOC:ai]	366	2557	101	21118	0.0394994	0.275956	query_1	['GO:0006259', 'GO:0019219', 'GO:0060255']
140	GO:BP	GO:1901566	organonitrogen compound biosynthetic process	1.81112e-12	TRUE	"The chemical reactions and pathways resulting in the formation of organonitrogen compound." [GOC:pr, GOC:TermGenie]	1570	2557	296	21118	0.115761	0.188535	query_1	['GO:1901564', 'GO:1901576']
141	GO:BP	GO:0007091	metaphase/anaphase transition of mitotic cell cycle	1.84e-12	TRUE	"The cell cycle process in which a cell progresses from metaphase to anaphase during mitosis, triggered by the activation of the anaphase promoting complex by Cdc20/Sleepy homolog which results in the degradation of Securin." [GOC:mtg_cell_cycle, PMID:10465783]	59	2557	33	21118	0.0129057	0.559322	query_1	['GO:0010965', 'GO:0044772', 'GO:0044784']
142	GO:BP	GO:0006403	RNA localization	2.059e-12	TRUE	"A process in which RNA is transported to, or maintained in, a specific location." [GOC:ai]	170	2557	61	21118	0.0238561	0.358824	query_1	['GO:0033036']
143	GO:BP	GO:0033108	mitochondrial respiratory chain complex assembly	2.31178e-12	TRUE	"The aggregation, arrangement and bonding together of a set of components to form a mitochondrial respiratory chain complex." [GOC:mah]	95	2557	43	21118	0.0168166	0.452632	query_1	['GO:0007005', 'GO:0034622']
144	GO:BP	GO:1903311	regulation of mRNA metabolic process	3.22335e-12	TRUE	"Any process that modulates the frequency, rate or extent of mRNA metabolic process." [GO_REF:0000058, GOC:TermGenie, GOC:vw]	282	2557	84	21118	0.032851	0.297872	query_1	['GO:0016071', 'GO:0051252']
145	GO:BP	GO:0010965	regulation of mitotic sister chromatid separation	3.61481e-12	TRUE	"Any process that modulates the frequency, rate or extent of mitotic sister chromatid separation. Mitotic sister chromatid separation is the process in which sister chromatids are physically detached from each other during mitosis." [GOC:dph, GOC:tb]	60	2557	33	21118	0.0129057	0.55	query_1	['GO:0051306', 'GO:1905818']
146	GO:BP	GO:0000075	cell cycle checkpoint signaling	4.2009e-12	TRUE	"A signaling process that controls cell cycle progression by monitoring the integrity of specific cell cycle events. A cell cycle checkpoint begins with detection of deficiencies or defects and ends with signal transduction." [GOC:mtg_cell_cycle]	150	2557	56	21118	0.0219007	0.373333	query_1	['GO:0035556', 'GO:1901988']
147	GO:BP	GO:0033045	regulation of sister chromatid segregation	4.24125e-12	TRUE	"Any process that modulates the frequency, rate or extent of sister chromatid segregation." [GOC:mah]	67	2557	35	21118	0.0136879	0.522388	query_1	['GO:0000819', 'GO:0010564', 'GO:0033044', 'GO:0051983']
148	GO:BP	GO:2001251	negative regulation of chromosome organization	4.42412e-12	TRUE	"Any process that stops, prevents or reduces the frequency, rate or extent of chromosome organization." [GOC:obol]	85	2557	40	21118	0.0156433	0.470588	query_1	['GO:0010639', 'GO:0033044', 'GO:0051276']
149	GO:BP	GO:0060255	regulation of macromolecule metabolic process	6.04554e-12	TRUE	"Any process that modulates the frequency, rate or extent of the chemical reactions and pathways involving macromolecules, any molecule of high relative molecular mass, the structure of which essentially comprises the multiple repetition of units derived, actually or conceptually, from molecules of low relative molecular mass." [GOC:dph, GOC:tb]	6363	2557	944	21118	0.369183	0.148358	query_1	['GO:0019222', 'GO:0043170']
150	GO:BP	GO:0030071	regulation of mitotic metaphase/anaphase transition	8.61389e-12	TRUE	"Any process that modulates the frequency, rate or extent of the cell cycle process in which a cell progresses from metaphase to anaphase during mitosis, triggered by the activation of the anaphase promoting complex by Cdc20/Sleepy homolog which results in the degradation of Securin." [GOC:mah]	58	2557	32	21118	0.0125147	0.551724	query_1	['GO:0007091', 'GO:0010965', 'GO:1901990', 'GO:1902099']
151	GO:BP	GO:0051129	negative regulation of cellular component organization	9.85753e-12	TRUE	"Any process that stops, prevents, or reduces the frequency, rate or extent of a process involved in the formation, arrangement of constituent parts, or disassembly of cell structures, including the plasma membrane and any external encapsulating structures such as the cell wall and cell envelope." [GOC:ai]	752	2557	166	21118	0.0649198	0.220745	query_1	['GO:0016043', 'GO:0048523', 'GO:0051128']
152	GO:BP	GO:0051983	regulation of chromosome segregation	1.05881e-11	TRUE	"Any process that modulates the frequency, rate or extent of chromosome segregation, the process in which genetic material, in the form of chromosomes, is organized and then physically separated and apportioned to two or more sets." [GOC:ai]	83	2557	39	21118	0.0152522	0.46988	query_1	['GO:0007059', 'GO:0050794']
153	GO:BP	GO:0022904	respiratory electron transport chain	1.19573e-11	TRUE	"A process in which a series of electron carriers operate together to transfer electrons from donors such as NADH and FADH2 to any of several different terminal electron acceptors to generate a transmembrane electrochemical gradient." [GOC:mtg_electron_transport, ISBN:0716720094]	87	2557	40	21118	0.0156433	0.45977	query_1	['GO:0022900', 'GO:0045333']
154	GO:BP	GO:0044784	metaphase/anaphase transition of cell cycle	1.3159e-11	TRUE	"The cell cycle process in which a cell progresses from metaphase to anaphase as part of the cell cycle." [GOC:mtg_cell_cycle]	62	2557	33	21118	0.0129057	0.532258	query_1	['GO:0033045', 'GO:0044770']
155	GO:BP	GO:0045839	negative regulation of mitotic nuclear division	1.34647e-11	TRUE	"Any process that stops, prevents or reduces the rate or extent of mitosis. Mitosis is the division of the eukaryotic cell nucleus to produce two daughter nuclei that, usually, contain the identical chromosome complement to their mother." [GOC:dph, GOC:go_curators, GOC:tb]	49	2557	29	21118	0.0113414	0.591837	query_1	['GO:0007088', 'GO:0010948', 'GO:0045930', 'GO:0051784', 'GO:0140014']
156	GO:BP	GO:0000910	cytokinesis	1.89219e-11	TRUE	"The division of the cytoplasm and the plasma membrane of a cell and its partitioning into two daughter cells." [GOC:mtg_cell_cycle]	159	2557	57	21118	0.0222917	0.358491	query_1	['GO:0022402', 'GO:0051301']
157	GO:BP	GO:0045184	establishment of protein localization	2.23593e-11	TRUE	"The directed movement of a protein to a specific location." [GOC:bf]	1647	2557	303	21118	0.118498	0.183971	query_1	['GO:0008104', 'GO:0051234']
158	GO:BP	GO:0007088	regulation of mitotic nuclear division	2.24676e-11	TRUE	"Any process that modulates the frequency, rate or extent of mitosis." [GOC:go_curators]	104	2557	44	21118	0.0172077	0.423077	query_1	['GO:0007346', 'GO:0010564', 'GO:0051783', 'GO:0140014']
159	GO:BP	GO:0010639	negative regulation of organelle organization	2.29229e-11	TRUE	"Any process that decreases the frequency, rate or extent of a process involved in the formation, arrangement of constituent parts, or disassembly of an organelle." [GOC:dph, GOC:tb]	354	2557	96	21118	0.037544	0.271186	query_1	['GO:0006996', 'GO:0033043', 'GO:0051129']
160	GO:BP	GO:2001020	regulation of response to DNA damage stimulus	3.17808e-11	TRUE	"Any process that modulates the frequency, rate or extent of response to DNA damage stimulus." [GOC:obol]	217	2557	69	21118	0.0269847	0.317972	query_1	['GO:0006974', 'GO:0080135']
161	GO:BP	GO:0051179	localization	3.52403e-11	TRUE	"Any process in which a cell, a substance, or a cellular entity, such as a protein complex or organelle, is transported, tethered to or otherwise maintained in a specific location. In the case of substances, localization may also be achieved via selective degradation." [GOC:ai, GOC:dos]	6168	2557	914	21118	0.35745	0.148184	query_1	['GO:0008150']
162	GO:BP	GO:0043603	cellular amide metabolic process	3.67774e-11	TRUE	"The chemical reactions and pathways involving an amide, any derivative of an oxoacid in which an acidic hydroxy group has been replaced by an amino or substituted amino group, as carried out by individual cells." [GOC:curators]	1077	2557	216	21118	0.084474	0.200557	query_1	['GO:0034641']
163	GO:BP	GO:0090307	mitotic spindle assembly	4.4592e-11	TRUE	"Mitotic bipolar spindle assembly begins with spindle microtubule nucleation from the separated spindle pole body, includes spindle elongation during prometaphase, and is complete when all kinetochores are stably attached the spindle, and the spindle assembly checkpoint is satisfied." [GOC:tb, GOC:vw]	64	2557	33	21118	0.0129057	0.515625	query_1	['GO:0007052', 'GO:0051225', 'GO:0140014']
164	GO:BP	GO:1902099	regulation of metaphase/anaphase transition of cell cycle	5.86408e-11	TRUE	"Any process that modulates the frequency, rate or extent of metaphase/anaphase transition of cell cycle." [GOC:mtg_cell_cycle, GOC:TermGenie]	61	2557	32	21118	0.0125147	0.52459	query_1	['GO:0033045', 'GO:0044784', 'GO:1901987']
165	GO:BP	GO:0033047	regulation of mitotic sister chromatid segregation	7.29618e-11	TRUE	"Any process that modulates the frequency, rate or extent of sister chromatid segregation during mitosis." [GOC:mah]	45	2557	27	21118	0.0105592	0.6	query_1	['GO:0000070', 'GO:0033045']
166	GO:BP	GO:0044265	cellular macromolecule catabolic process	8.17689e-11	TRUE	"The chemical reactions and pathways resulting in the breakdown of a macromolecule, any large molecule including proteins, nucleic acids and carbohydrates, as carried out by individual cells." [GOC:jl]	1085	2557	216	21118	0.084474	0.199078	query_1	['GO:0009057', 'GO:0044248', 'GO:0044260']
167	GO:BP	GO:0019646	aerobic electron transport chain	1.16228e-10	TRUE	"A process in which a series of electron carriers operate together to transfer electrons from donors such as NADH and FADH2 to oxygen to generate a transmembrane electrochemical gradient." [GOC:ai, GOC:mtg_electron_transport]	52	2557	29	21118	0.0113414	0.557692	query_1	['GO:0006119', 'GO:0009060', 'GO:0022904']
168	GO:BP	GO:0006091	generation of precursor metabolites and energy	1.17927e-10	TRUE	"The chemical reactions and pathways resulting in the formation of precursor metabolites, substances from which energy is derived, and any process involved in the liberation of energy from these substances." [GOC:jl]	446	2557	111	21118	0.0434102	0.248879	query_1	['GO:0044237']
169	GO:BP	GO:0034508	centromere complex assembly	1.1926e-10	TRUE	"The aggregation, arrangement and bonding together of proteins and centromeric DNA molecules to form a centromeric protein-DNA complex. Includes the formation of the chromatin structures which form a platform for the kinetochore, and assembly of the kinetochore onto this specialized chromatin. In fission yeast and higher eukaryotes this process also includes the formation of heterochromatin at th…	26	2557	20	21118	0.00782167	0.769231	query_1	['GO:0051276', 'GO:0065004']
170	GO:BP	GO:0051298	centrosome duplication	2.09308e-10	TRUE	"The replication of a centrosome, a structure comprised of a pair of centrioles and peri-centriolar material from which a microtubule spindle apparatus is organized." [GOC:ai]	74	2557	35	21118	0.0136879	0.472973	query_1	['GO:0007098', 'GO:0022402']
171	GO:BP	GO:1905818	regulation of chromosome separation	2.46707e-10	TRUE	"Any process that modulates the frequency, rate or extent of chromosome separation." [GO_REF:0000058, GOC:bhm, GOC:TermGenie, PMID:21795393]	67	2557	33	21118	0.0129057	0.492537	query_1	['GO:0010564', 'GO:0051304', 'GO:0051983']
172	GO:BP	GO:0051783	regulation of nuclear division	2.71158e-10	TRUE	"Any process that modulates the frequency, rate or extent of nuclear division, the partitioning of the nucleus and its genetic information." [GOC:ai]	136	2557	50	21118	0.0195542	0.367647	query_1	['GO:0000280', 'GO:0033043']
173	GO:BP	GO:0051493	regulation of cytoskeleton organization	3.13328e-10	TRUE	"Any process that modulates the frequency, rate or extent of the formation, arrangement of constituent parts, or disassembly of cytoskeletal structures." [GOC:ai]	533	2557	125	21118	0.0488854	0.234522	query_1	['GO:0007010', 'GO:0033043']
174	GO:BP	GO:0009891	positive regulation of biosynthetic process	3.25373e-10	TRUE	"Any process that activates or increases the frequency, rate or extent of the chemical reactions and pathways resulting in the formation of substances." [GOC:go_curators]	1999	2557	349	21118	0.136488	0.174587	query_1	['GO:0009058', 'GO:0009889', 'GO:0009893']
175	GO:BP	GO:1901988	negative regulation of cell cycle phase transition	3.56877e-10	TRUE	"Any process that stops, prevents or reduces the frequency, rate or extent of cell cycle phase transition." [GOC:mtg_cell_cycle, GOC:TermGenie, PMID:22841721]	207	2557	65	21118	0.0254204	0.31401	query_1	['GO:0010948', 'GO:0044770', 'GO:1901987']
176	GO:BP	GO:0045841	negative regulation of mitotic metaphase/anaphase transition	3.90789e-10	TRUE	"Any process that stops, prevents, or reduces the frequency, rate or extent of the cell cycle process in which a cell progresses from metaphase to anaphase during mitosis, triggered by the activation of the anaphase promoting complex by Cdc20/Sleepy homolog which results in the degradation of Securin." [GOC:go_curators]	41	2557	25	21118	0.00977708	0.609756	query_1	['GO:0007091', 'GO:0030071', 'GO:0045839', 'GO:1901991', 'GO:1902100', 'GO:2000816']
177	GO:BP	GO:0006310	DNA recombination	4.37501e-10	TRUE	"Any process in which a new genotype is formed by reassortment of genes resulting in gene combinations different from those that were present in the parents. In eukaryotes genetic recombination can occur by chromosome assortment, intrachromosomal recombination, or nonreciprocal interchromosomal recombination. Interchromosomal recombination occurs by crossing over. In bacteria it may occur by gene…	284	2557	80	21118	0.0312867	0.28169	query_1	['GO:0006259']
178	GO:BP	GO:0015980	energy derivation by oxidation of organic compounds	4.55559e-10	TRUE	"The chemical reactions and pathways by which a cell derives energy from organic compounds; results in the oxidation of the compounds from which energy is released." [GOC:mah]	300	2557	83	21118	0.0324599	0.276667	query_1	['GO:0006091']
179	GO:BP	GO:0031328	positive regulation of cellular biosynthetic process	4.8986e-10	TRUE	"Any process that activates or increases the frequency, rate or extent of the chemical reactions and pathways resulting in the formation of substances, carried out by individual cells." [GOC:mah]	1956	2557	342	21118	0.13375	0.174847	query_1	['GO:0009891', 'GO:0031325', 'GO:0031326', 'GO:0044249']
180	GO:BP	GO:0009057	macromolecule catabolic process	5.76968e-10	TRUE	"The chemical reactions and pathways resulting in the breakdown of a macromolecule, any molecule of high relative molecular mass, the structure of which essentially comprises the multiple repetition of units derived, actually or conceptually, from molecules of low relative molecular mass." [GOC:mah]	1283	2557	243	21118	0.0950332	0.1894	query_1	['GO:0043170', 'GO:1901575']
181	GO:BP	GO:0006839	mitochondrial transport	5.87885e-10	TRUE	"Transport of substances into, out of or within a mitochondrion." [GOC:ai]	209	2557	65	21118	0.0254204	0.311005	query_1	['GO:0006810']
182	GO:BP	GO:0044839	cell cycle G2/M phase transition	6.04909e-10	TRUE	"The cell cycle process by which a cell in G2 phase commits to M phase." [GOC:jl, GOC:mtg_cell_cycle]	134	2557	49	21118	0.0191631	0.365672	query_1	['GO:0044770']
183	GO:BP	GO:0051784	negative regulation of nuclear division	6.1907e-10	TRUE	"Any process that stops, prevents, or reduces the frequency, rate or extent of nuclear division, the partitioning of the nucleus and its genetic information." [GOC:ai]	58	2557	30	21118	0.0117325	0.517241	query_1	['GO:0000280', 'GO:0010639', 'GO:0051783']
184	GO:BP	GO:0044087	regulation of cellular component biogenesis	6.49694e-10	TRUE	"Any process that modulates the frequency, rate or extent of cellular component biogenesis, a process that results in the biosynthesis of constituent macromolecules, assembly, and arrangement of constituent parts of a cellular component." [GOC:jl]	977	2557	196	21118	0.0766523	0.200614	query_1	['GO:0044085', 'GO:0050794']
185	GO:BP	GO:0071897	DNA biosynthetic process	7.33909e-10	TRUE	"The cellular DNA metabolic process resulting in the formation of DNA, deoxyribonucleic acid, one of the two main types of nucleic acid, consisting of a long unbranched macromolecule formed from one or two strands of linked deoxyribonucleotides, the 3'-phosphate group of each constituent deoxyribonucleotide being joined in 3',5'-phosphodiester linkage to the 5'-hydroxyl group of the deoxyribose m…	176	2557	58	21118	0.0226828	0.329545	query_1	['GO:0006259', 'GO:0034645', 'GO:0034654']
186	GO:BP	GO:0045930	negative regulation of mitotic cell cycle	7.52101e-10	TRUE	"Any process that stops, prevents or reduces the rate or extent of progression through the mitotic cell cycle." [GOC:dph, GOC:go_curators, GOC:tb]	210	2557	65	21118	0.0254204	0.309524	query_1	['GO:0000278', 'GO:0007346', 'GO:0045786']
187	GO:BP	GO:0071459	protein localization to chromosome, centromeric region	7.63965e-10	TRUE	"Any process in which a protein is transported to, or maintained at, the centromeric region of a chromosome." [GOC:mah]	25	2557	19	21118	0.00743058	0.76	query_1	['GO:0034502']
188	GO:BP	GO:0033048	negative regulation of mitotic sister chromatid segregation	8.54329e-10	TRUE	"Any process that stops, prevents, or reduces the frequency, rate or extent of sister chromatid segregation during mitosis." [GOC:mah]	42	2557	25	21118	0.00977708	0.595238	query_1	['GO:0000070', 'GO:0033046', 'GO:0033047']
189	GO:BP	GO:0033046	negative regulation of sister chromatid segregation	8.54329e-10	TRUE	"Any process that stops, prevents, or reduces the frequency, rate or extent of sister chromatid segregation." [GOC:mah]	42	2557	25	21118	0.00977708	0.595238	query_1	['GO:0000819', 'GO:0010948', 'GO:0033045', 'GO:0051985', 'GO:2001251']
190	GO:BP	GO:2000816	negative regulation of mitotic sister chromatid separation	8.54329e-10	TRUE	"Any process that stops, prevents or reduces the frequency, rate or extent of mitotic sister chromatid separation." [GOC:obol]	42	2557	25	21118	0.00977708	0.595238	query_1	['GO:0010965', 'GO:0033048', 'GO:0051306', 'GO:1905819']
191	GO:BP	GO:0006464	cellular protein modification process	9.49454e-10	TRUE	"The covalent alteration of one or more amino acids occurring in proteins, peptides and nascent polypeptides (co-translational, post-translational modifications) occurring at the level of an individual cell. Includes the modification of charged tRNAs that are destined to occur in a protein (pre-translation modification)." [GOC:go_curators]	3644	2557	574	21118	0.224482	0.157519	query_1	['GO:0036211', 'GO:0044267']
192	GO:BP	GO:0036211	protein modification process	9.49454e-10	TRUE	"The covalent alteration of one or more amino acids occurring in proteins, peptides and nascent polypeptides (co-translational, post-translational modifications). Includes the modification of charged tRNAs that are destined to occur in a protein (pre-translation modification)." [GOC:bf, GOC:jl]	3644	2557	574	21118	0.224482	0.157519	query_1	['GO:0019538', 'GO:0043412']
193	GO:BP	GO:0009892	negative regulation of metabolic process	1.04491e-09	TRUE	"Any process that stops, prevents, or reduces the frequency, rate or extent of the chemical reactions and pathways within a cell or an organism." [GOC:go_curators]	3239	2557	519	21118	0.202972	0.160235	query_1	['GO:0008152', 'GO:0019222', 'GO:0048519']
194	GO:BP	GO:0031503	protein-containing complex localization	1.13091e-09	TRUE	"A localization process that acts on a protein complex; the complex is transported to, or maintained in, a specific location." [GOC:mah]	247	2557	72	21118	0.028158	0.291498	query_1	['GO:0051179']
195	GO:BP	GO:0050684	regulation of mRNA processing	1.14922e-09	TRUE	"Any process that modulates the frequency, rate or extent of mRNA processing, those processes involved in the conversion of a primary mRNA transcript into a mature mRNA prior to its translation into polypeptide." [GOC:ai]	145	2557	51	21118	0.0199452	0.351724	query_1	['GO:0006397', 'GO:1903311']
196	GO:BP	GO:0006120	mitochondrial electron transport, NADH to ubiquinone	1.26291e-09	TRUE	"The transfer of electrons from NADH to ubiquinone that occurs during oxidative phosphorylation." [ISBN:0716731363]	28	2557	20	21118	0.00782167	0.714286	query_1	['GO:0019646', 'GO:0042775']
197	GO:BP	GO:0043412	macromolecule modification	1.39122e-09	TRUE	"The covalent alteration of one or more monomeric units in a polypeptide, polynucleotide, polysaccharide, or other biological macromolecule, resulting in a change in its properties." [GOC:go_curators]	3823	2557	597	21118	0.233477	0.15616	query_1	['GO:0043170']
198	GO:BP	GO:0051172	negative regulation of nitrogen compound metabolic process	1.7109e-09	TRUE	"Any process that stops, prevents, or reduces the frequency, rate or extent of the chemical reactions and pathways involving nitrogen or nitrogenous compounds." [GOC:ai, GOC:tb]	2542	2557	422	21118	0.165037	0.166011	query_1	['GO:0006807', 'GO:0009892', 'GO:0051171']
199	GO:BP	GO:1902100	negative regulation of metaphase/anaphase transition of cell cycle	1.80598e-09	TRUE	"Any process that stops, prevents or reduces the frequency, rate or extent of metaphase/anaphase transition of cell cycle." [GOC:mtg_cell_cycle, GOC:TermGenie]	43	2557	25	21118	0.00977708	0.581395	query_1	['GO:0044784', 'GO:1901988', 'GO:1902099']
200	GO:BP	GO:0072594	establishment of protein localization to organelle	1.88493e-09	TRUE	"The directed movement of a protein to a specific location on or in an organelle. Encompasses establishment of localization in the membrane or lumen of a membrane-bounded organelle." [GOC:mah]	401	2557	100	21118	0.0391083	0.249377	query_1	['GO:0033365', 'GO:0045184']
201	GO:BP	GO:0006323	DNA packaging	1.94509e-09	TRUE	"Any process in which DNA and associated proteins are formed into a compact, orderly structure." [GOC:mah, ISBN:0815316194]	204	2557	63	21118	0.0246382	0.308824	query_1	['GO:0071103']
202	GO:BP	GO:0051236	establishment of RNA localization	2.11113e-09	TRUE	"The directed movement of RNA to a specific location." [GOC:ai]	147	2557	51	21118	0.0199452	0.346939	query_1	['GO:0006403', 'GO:0051234']
203	GO:BP	GO:0031324	negative regulation of cellular metabolic process	2.83106e-09	TRUE	"Any process that stops, prevents, or reduces the frequency, rate or extent of the chemical reactions and pathways by which individual cells transform chemical substances." [GOC:mah]	2731	2557	447	21118	0.174814	0.163676	query_1	['GO:0009892', 'GO:0031323', 'GO:0044237', 'GO:0048523']
204	GO:BP	GO:0016570	histone modification	3.01495e-09	TRUE	"The covalent alteration of one or more amino acid residues within a histone protein." [GOC:krc]	467	2557	111	21118	0.0434102	0.237687	query_1	['GO:0006464', 'GO:0016569']
205	GO:BP	GO:0050658	RNA transport	3.40316e-09	TRUE	"The directed movement of RNA, ribonucleic acids, into, out of or within a cell, or between cells, by means of some agent such as a transporter or pore." [GOC:ai]	144	2557	50	21118	0.0195542	0.347222	query_1	['GO:0050657', 'GO:0051236']
206	GO:BP	GO:0050657	nucleic acid transport	3.40316e-09	TRUE	"The directed movement of nucleic acids, single or double-stranded polynucleotides involved in the storage, transmission and transfer of genetic information, into, out of or within a cell, or between cells, by means of some agent such as a transporter or pore." [GOC:ai, ISBN:0198506732]	144	2557	50	21118	0.0195542	0.347222	query_1	['GO:0015931']
207	GO:BP	GO:0034501	protein localization to kinetochore	3.45865e-09	TRUE	"Any process in which a protein is transported to, or maintained at, the kinetochore." [GOC:mah]	19	2557	16	21118	0.00625733	0.842105	query_1	['GO:0071459', 'GO:1903083']
208	GO:BP	GO:1903083	protein localization to condensed chromosome	3.45865e-09	TRUE	"A process in which a protein is transported to, or maintained in, a location within a condensed chromosome." [GO_REF:0000087, GOC:kmv, GOC:TermGenie, pmid:12707312]	19	2557	16	21118	0.00625733	0.842105	query_1	['GO:0034502']
209	GO:BP	GO:0016569	covalent chromatin modification	3.67512e-09	TRUE	"The alteration of DNA or protein in chromatin by the covalent addition or removal of chemical groups." [GOC:mah, GOC:vw]	480	2557	113	21118	0.0441924	0.235417	query_1	['GO:0006325', 'GO:0043412']
210	GO:BP	GO:1905819	negative regulation of chromosome separation	3.70097e-09	TRUE	"Any process that stops, prevents or reduces the frequency, rate or extent of chromosome separation." [GO_REF:0000058, GOC:bhm, GOC:TermGenie, PMID:21795393]	44	2557	25	21118	0.00977708	0.568182	query_1	['GO:0010948', 'GO:0051304', 'GO:0051985', 'GO:1905818']
211	GO:BP	GO:0051985	negative regulation of chromosome segregation	3.70097e-09	TRUE	"Any process that stops, prevents, or reduces the frequency, rate or extent of chromosome segregation, the process in which genetic material, in the form of chromosomes, is organized and then physically separated and apportioned to two or more sets." [GOC:ai]	44	2557	25	21118	0.00977708	0.568182	query_1	['GO:0007059', 'GO:0048523', 'GO:0051983']
212	GO:BP	GO:0032392	DNA geometric change	3.76351e-09	TRUE	"The process in which a transformation is induced in the geometry of a DNA double helix, resulting in a change in twist, writhe, or both, but with no change in linking number. Includes the unwinding of double-stranded DNA by helicases." [GOC:mah]	84	2557	36	21118	0.014079	0.428571	query_1	['GO:0071103']
213	GO:BP	GO:0065009	regulation of molecular function	4.06562e-09	TRUE	"Any process that modulates the frequency, rate or extent of a molecular function, an elemental biological activity occurring at the molecular level, such as catalysis or binding." [GOC:isa_complete]	3029	2557	487	21118	0.190458	0.160779	query_1	['GO:0065007']
214	GO:BP	GO:0008219	cell death	4.35453e-09	TRUE	"Any biological process that results in permanent cessation of all vital functions of a cell. A cell should be considered dead when any one of the following molecular or morphological criteria is met: (1) the cell has lost the integrity of its plasma membrane; (2) the cell, including its nucleus, has undergone complete fragmentation into discrete bodies (frequently referred to as apoptotic bodies…	2136	2557	363	21118	0.141963	0.169944	query_1	['GO:0009987']
215	GO:BP	GO:0008608	attachment of spindle microtubules to kinetochore	4.69695e-09	TRUE	"The process in which spindle microtubules become physically associated with the proteins making up the kinetochore complex." [GOC:vw, PMID:10322137]	35	2557	22	21118	0.00860383	0.628571	query_1	['GO:0022402', 'GO:0098813']
216	GO:BP	GO:0010557	positive regulation of macromolecule biosynthetic process	5.40097e-09	TRUE	"Any process that increases the rate, frequency or extent of the chemical reactions and pathways resulting in the formation of a macromolecule, any molecule of high relative molecular mass, the structure of which essentially comprises the multiple repetition of units derived, actually or conceptually, from molecules of low relative molecular mass." [GOC:dph, GOC:tb]	1844	2557	321	21118	0.125538	0.174078	query_1	['GO:0009059', 'GO:0009891', 'GO:0010556', 'GO:0010604']
217	GO:BP	GO:0032200	telomere organization	5.55442e-09	TRUE	"A process that is carried out at the cellular level which results in the assembly, arrangement of constituent parts, or disassembly of telomeres, terminal regions of a linear chromosome that include the telomeric DNA repeats and associated proteins." [GOC:dph, GOC:jl, GOC:mah]	123	2557	45	21118	0.0175987	0.365854	query_1	['GO:0051276']
218	GO:BP	GO:0071705	nitrogen compound transport	6.13875e-09	TRUE	"The directed movement of nitrogen-containing compounds into, out of or within a cell, or between cells, by means of some agent such as a transporter or pore." [GOC:mah]	1986	2557	341	21118	0.133359	0.171702	query_1	['GO:0006810']
219	GO:BP	GO:0045935	positive regulation of nucleobase-containing compound metabolic process	7.62393e-09	TRUE	"Any cellular process that activates or increases the frequency, rate or extent of the chemical reactions and pathways involving nucleobases, nucleosides, nucleotides and nucleic acids." [GOC:go_curators]	1912	2557	330	21118	0.129057	0.172594	query_1	['GO:0006139', 'GO:0019219', 'GO:0031325', 'GO:0051173']
220	GO:BP	GO:1903046	meiotic cell cycle process	8.1474e-09	TRUE	"A process that is part of the meiotic cell cycle." [GO_REF:0000060, GOC:mtg_cell_cycle, GOC:TermGenie]	205	2557	62	21118	0.0242472	0.302439	query_1	['GO:0022402', 'GO:0022414', 'GO:0051321']
221	GO:BP	GO:1901991	negative regulation of mitotic cell cycle phase transition	9.94807e-09	TRUE	"Any process that stops, prevents or reduces the frequency, rate or extent of mitotic cell cycle phase transition." [GOC:mtg_cell_cycle, GOC:TermGenie, PMID:22841721]	143	2557	49	21118	0.0191631	0.342657	query_1	['GO:0044772', 'GO:0045930', 'GO:1901988', 'GO:1901990']
222	GO:BP	GO:0071174	mitotic spindle checkpoint signaling	9.97186e-09	TRUE	"A signaling process that contributes to a mitotic cell cycle checkpoint that originates from the spindle and delays the metaphase/anaphase transition of a mitotic nuclear division until the spindle is correctly assembled and oriented, the completion of anaphase until chromosomes are attached to the spindle, or mitotic exit and cytokinesis when the spindle does not form." [GOC:mtg_cell_cycle]	39	2557	23	21118	0.00899492	0.589744	query_1	['GO:0007093', 'GO:0031577']
223	GO:BP	GO:0071173	spindle assembly checkpoint signaling	9.97186e-09	TRUE	"A signaling process that delays the metaphase/anaphase transition until the spindle is correctly assembled and chromosomes are attached to the spindle." [GOC:mah]	39	2557	23	21118	0.00899492	0.589744	query_1	['GO:0031577']
224	GO:BP	GO:0007094	mitotic spindle assembly checkpoint signaling	9.97186e-09	TRUE	"A signal transduction process that contributes to a mitotic cell cycle spindle assembly checkpoint, that delays the metaphase/anaphase transition of a mitotic nuclear division until the spindle is correctly assembled and chromosomes are attached to the spindle." [GOC:mtg_cell_cycle, PMID:12360190]	39	2557	23	21118	0.00899492	0.589744	query_1	['GO:0045841', 'GO:0071173', 'GO:0071174']
225	GO:BP	GO:0000086	G2/M transition of mitotic cell cycle	1.23642e-08	TRUE	"The mitotic cell cycle transition by which a cell in G2 commits to M phase. The process begins when the kinase activity of M cyclin/CDK complex reaches a threshold high enough for the cell cycle to proceed. This is accomplished by activating a positive feedback loop that results in the accumulation of unphosphorylated and active M cyclin/CDK complex." [GOC:mtg_cell_cycle]	121	2557	44	21118	0.0172077	0.363636	query_1	['GO:0044772', 'GO:0044839']
226	GO:BP	GO:0019219	regulation of nucleobase-containing compound metabolic process	1.44863e-08	TRUE	"Any cellular process that modulates the frequency, rate or extent of the chemical reactions and pathways involving nucleobases, nucleosides, nucleotides and nucleic acids." [GOC:go_curators]	3931	2557	605	21118	0.236605	0.153905	query_1	['GO:0006139', 'GO:0031323', 'GO:0051171', 'GO:0080090']
227	GO:BP	GO:0051383	kinetochore organization	1.53358e-08	TRUE	"A process that is carried out at the cellular level which results in the assembly, arrangement of constituent parts, or disassembly of the kinetochore, a multisubunit complex that is located at the centromeric region of DNA and provides an attachment point for the spindle microtubules." [GOC:ai, GOC:dph, GOC:jl, GOC:mah]	20	2557	16	21118	0.00625733	0.8	query_1	['GO:0051276']
228	GO:BP	GO:0006364	rRNA processing	1.63418e-08	TRUE	"Any process involved in the conversion of a primary ribosomal RNA (rRNA) transcript into one or more mature rRNA molecules." [GOC:curators]	208	2557	62	21118	0.0242472	0.298077	query_1	['GO:0016072', 'GO:0034470', 'GO:0042254']
229	GO:BP	GO:0032465	regulation of cytokinesis	2.051e-08	TRUE	"Any process that modulates the frequency, rate or extent of the division of the cytoplasm of a cell and its separation into two daughter cells." [GOC:mah]	84	2557	35	21118	0.0136879	0.416667	query_1	['GO:0000910', 'GO:0010564', 'GO:0051302']
230	GO:BP	GO:0031577	spindle checkpoint signaling	2.07707e-08	TRUE	"A signaling process that that controls a cell cycle checkpoint that originates from the mitotic or meiotic spindle." [GOC:mtg_cell_cycle]	40	2557	23	21118	0.00899492	0.575	query_1	['GO:0000075']
231	GO:BP	GO:0042254	ribosome biogenesis	2.19313e-08	TRUE	"A cellular process that results in the biosynthesis of constituent macromolecules, assembly, and arrangement of constituent parts of ribosome subunits; includes transport to the sites of protein synthesis." [GOC:ma, PMID:26404467, Wikipedia:Ribosome_biogenesis]	288	2557	77	21118	0.0301134	0.267361	query_1	['GO:0022613']
232	GO:BP	GO:0051028	mRNA transport	2.28545e-08	TRUE	"The directed movement of mRNA, messenger ribonucleic acid, into, out of or within a cell, or between cells, by means of some agent such as a transporter or pore." [GOC:ai]	114	2557	42	21118	0.0164255	0.368421	query_1	['GO:0050658']
233	GO:BP	GO:0006457	protein folding	3.78531e-08	TRUE	"The process of assisting in the covalent and noncovalent assembly of single chain polypeptides or multisubunit complexes into the correct tertiary structure." [GOC:go_curators, GOC:rb]	162	2557	52	21118	0.0203363	0.320988	query_1	['GO:0009987']
234	GO:BP	GO:0016072	rRNA metabolic process	3.90899e-08	TRUE	"The chemical reactions and pathways involving rRNA, ribosomal RNA, a structural constituent of ribosomes." [ISBN:0198506732]	217	2557	63	21118	0.0246382	0.290323	query_1	['GO:0034660']
235	GO:BP	GO:0044093	positive regulation of molecular function	4.01269e-08	TRUE	"Any process that activates or increases the rate or extent of a molecular function, an elemental biological activity occurring at the molecular level, such as catalysis or binding." [GO:jl]	1678	2557	293	21118	0.114587	0.174613	query_1	['GO:0065009']
236	GO:BP	GO:0006886	intracellular protein transport	4.21894e-08	TRUE	"The directed movement of proteins in a cell, including the movement of proteins between specific compartments or structures within a cell, such as organelles of a eukaryotic cell." [GOC:mah]	839	2557	168	21118	0.065702	0.200238	query_1	['GO:0015031', 'GO:0034613', 'GO:0046907']
237	GO:BP	GO:0034655	nucleobase-containing compound catabolic process	4.32049e-08	TRUE	"The chemical reactions and pathways resulting in the breakdown of nucleobases, nucleosides, nucleotides and nucleic acids." [GOC:mah]	381	2557	93	21118	0.0363707	0.244094	query_1	['GO:0006139', 'GO:0019439', 'GO:0044270', 'GO:0046700', 'GO:1901361']
238	GO:BP	GO:0006913	nucleocytoplasmic transport	4.62333e-08	TRUE	"The directed movement of molecules between the nucleus and the cytoplasm." [GOC:go_curators]	314	2557	81	21118	0.0316777	0.257962	query_1	['GO:0051169']
239	GO:BP	GO:0051169	nuclear transport	4.62333e-08	TRUE	"The directed movement of substances into, out of, or within the nucleus." [GOC:ai]	314	2557	81	21118	0.0316777	0.257962	query_1	['GO:0046907']
240	GO:BP	GO:0000723	telomere maintenance	5.18372e-08	TRUE	"Any process that contributes to the maintenance of proper telomeric length and structure by affecting and monitoring the activity of telomeric proteins, the length of telomeric DNA and the replication and repair of the DNA. These processes includes those that shorten, lengthen, replicate and repair the telomeric DNA sequences." [GOC:BHF, GOC:BHF_telomere, GOC:elh, GOC:rl, PMID:11092831]	121	2557	43	21118	0.0168166	0.355372	query_1	['GO:0006259', 'GO:0032200', 'GO:0060249']
241	GO:BP	GO:0140013	meiotic nuclear division	6.82841e-08	TRUE	"One of the two nuclear divisions that occur as part of the meiotic cell cycle." [PMID:9334324]	189	2557	57	21118	0.0222917	0.301587	query_1	['GO:0000280', 'GO:1903046']
242	GO:BP	GO:0043254	regulation of protein-containing complex assembly	6.96232e-08	TRUE	"Any process that modulates the frequency, rate or extent of protein complex assembly." [GOC:jl]	448	2557	104	21118	0.0406727	0.232143	query_1	['GO:0044087', 'GO:0051128', 'GO:0065003']
243	GO:BP	GO:1901362	organic cyclic compound biosynthetic process	8.40032e-08	TRUE	"The chemical reactions and pathways resulting in the formation of organic cyclic compound." [GOC:TermGenie]	4181	2557	633	21118	0.247556	0.151399	query_1	['GO:1901360', 'GO:1901576']
244	GO:BP	GO:1902749	regulation of cell cycle G2/M phase transition	9.20247e-08	TRUE	"Any signalling pathway that modulates the activity of a cell cycle cyclin-dependent protein kinase to modulate the switch from G2 phase to M phase of the cell cycle." [GO_REF:0000058, GOC:jl, GOC:TermGenie]	92	2557	36	21118	0.014079	0.391304	query_1	['GO:0044839', 'GO:1901987']
245	GO:BP	GO:0051098	regulation of binding	9.29584e-08	TRUE	"Any process that modulates the frequency, rate or extent of binding, the selective interaction of a molecule with one or more specific sites on another molecule." [GOC:ai]	386	2557	93	21118	0.0363707	0.240933	query_1	['GO:0065009']
246	GO:BP	GO:0006401	RNA catabolic process	9.32746e-08	TRUE	"The chemical reactions and pathways resulting in the breakdown of RNA, ribonucleic acid, one of the two main type of nucleic acid, consisting of a long, unbranched macromolecule formed from ribonucleotides joined in 3',5'-phosphodiester linkage." [ISBN:0198506732]	258	2557	70	21118	0.0273758	0.271318	query_1	['GO:0016070', 'GO:0034655', 'GO:0044265']
247	GO:BP	GO:0019438	aromatic compound biosynthetic process	1.05338e-07	TRUE	"The chemical reactions and pathways resulting in the formation of aromatic compounds, any substance containing an aromatic carbon ring." [GOC:ai]	4042	2557	614	21118	0.240125	0.151905	query_1	['GO:0006725', 'GO:0044249']
248	GO:BP	GO:0032508	DNA duplex unwinding	1.11616e-07	TRUE	"The process in which interchain hydrogen bonds between two strands of DNA are broken or 'melted', generating a region of unpaired single strands." [GOC:isa_complete, GOC:mah]	80	2557	33	21118	0.0129057	0.4125	query_1	['GO:0032392']
249	GO:BP	GO:0012501	programmed cell death	1.14539e-07	TRUE	"A process which begins when a cell receives an internal or external signal and activates a series of biochemical events (signaling pathway). The process ends with the death of the cell." [GOC:lr, GOC:mtg_apoptosis]	1975	2557	333	21118	0.130231	0.168608	query_1	['GO:0008219']
250	GO:BP	GO:0006915	apoptotic process	1.19481e-07	TRUE	"A programmed cell death process which begins when a cell receives an internal (e.g. DNA damage) or external signal (e.g. an extracellular death ligand), and proceeds through a series of biochemical events (signaling pathway phase) which trigger an execution phase. The execution phase is the last step of an apoptotic process, and is typically characterized by rounding-up of the cell, retraction o…	1919	2557	325	21118	0.127102	0.169359	query_1	['GO:0012501']
251	GO:BP	GO:0034654	nucleobase-containing compound biosynthetic process	1.27474e-07	TRUE	"The chemical reactions and pathways resulting in the formation of nucleobases, nucleosides, nucleotides and nucleic acids." [GOC:mah]	3963	2557	603	21118	0.235823	0.152157	query_1	['GO:0006139', 'GO:0018130', 'GO:0019438', 'GO:0044271', 'GO:1901362']
252	GO:BP	GO:0010605	negative regulation of macromolecule metabolic process	1.29378e-07	TRUE	"Any process that decreases the frequency, rate or extent of the chemical reactions and pathways involving macromolecules, any molecule of high relative molecular mass, the structure of which essentially comprises the multiple repetition of units derived, actually or conceptually, from molecules of low relative molecular mass." [GOC:dph, GOC:tb]	2999	2557	474	21118	0.185373	0.158053	query_1	['GO:0009892', 'GO:0043170', 'GO:0060255']
253	GO:BP	GO:1990542	mitochondrial transmembrane transport	1.32747e-07	TRUE	"The process in which a solute is transported from one side of a membrane to the other into, out of or within a mitochondrion." [PMID:20533899]	93	2557	36	21118	0.014079	0.387097	query_1	['GO:0006839', 'GO:0055085']
254	GO:BP	GO:0008283	cell population proliferation	1.51151e-07	TRUE	"The multiplication or reproduction of cells, resulting in the expansion of a cell population." [GOC:mah, GOC:mb]	2072	2557	346	21118	0.135315	0.166988	query_1	['GO:0009987']
255	GO:BP	GO:0018130	heterocycle biosynthetic process	1.55501e-07	TRUE	"The chemical reactions and pathways resulting in the formation of heterocyclic compounds, those with a cyclic molecular structure and at least two different atoms in the ring (or rings)." [ISBN:0198547684]	4028	2557	611	21118	0.238952	0.151688	query_1	['GO:0044249', 'GO:0046483']
256	GO:BP	GO:0030261	chromosome condensation	1.56015e-07	TRUE	"The progressive compaction of dispersed interphase chromatin into threadlike chromosomes prior to mitotic or meiotic nuclear division, or during apoptosis, in eukaryotic cells." [GOC:mah, ISBN:0815316194]	43	2557	23	21118	0.00899492	0.534884	query_1	['GO:0006323']
257	GO:BP	GO:0000281	mitotic cytokinesis	1.67559e-07	TRUE	"A cell cycle process that results in the division of the cytoplasm of a cell after mitosis, resulting in the separation of the original cell into two daughter cells." [GOC:mtg_cell_cycle]	65	2557	29	21118	0.0113414	0.446154	query_1	['GO:0061640', 'GO:1903047']
258	GO:BP	GO:0060341	regulation of cellular localization	1.82452e-07	TRUE	"Any process that modulates the frequency, rate or extent of a process in which a cell, a substance, or a cellular entity is transported to, or maintained in a specific location within or in the membrane of a cell." [GOC:dph, GOC:tb]	867	2557	170	21118	0.0664842	0.196078	query_1	['GO:0032879', 'GO:0050794', 'GO:0051641']
259	GO:BP	GO:0044786	cell cycle DNA replication	1.96317e-07	TRUE	"The DNA-dependent DNA replication that takes place as part of the cell cycle." [GOC:mtg_cell_cycle]	40	2557	22	21118	0.00860383	0.55	query_1	['GO:0006261', 'GO:0022402']
260	GO:BP	GO:0015031	protein transport	2.06555e-07	TRUE	"The directed movement of proteins into, out of or within a cell, or between cells, by means of some agent such as a transporter or pore." [GOC:ai]	1535	2557	269	21118	0.105201	0.175244	query_1	['GO:0045184', 'GO:0071702', 'GO:0071705']
261	GO:BP	GO:0031326	regulation of cellular biosynthetic process	2.11073e-07	TRUE	"Any process that modulates the frequency, rate or extent of the chemical reactions and pathways resulting in the formation of substances, carried out by individual cells." [GOC:mah]	4088	2557	618	21118	0.241689	0.151174	query_1	['GO:0009889', 'GO:0031323', 'GO:0044249']
262	GO:BP	GO:0000725	recombinational repair	2.59064e-07	TRUE	"A DNA repair process that involves the exchange, reciprocal or nonreciprocal, of genetic material between the broken DNA molecule and a homologous region of DNA." [GOC:elh]	131	2557	44	21118	0.0172077	0.335878	query_1	['GO:0006281', 'GO:0006310']
263	GO:BP	GO:0051054	positive regulation of DNA metabolic process	3.51175e-07	TRUE	"Any process that activates or increases the frequency, rate or extent of the chemical reactions and pathways involving DNA." [GOC:ai]	217	2557	61	21118	0.0238561	0.281106	query_1	['GO:0006259', 'GO:0010604', 'GO:0045935', 'GO:0051052']
264	GO:BP	GO:2001252	positive regulation of chromosome organization	3.56717e-07	TRUE	"Any process that activates or increases the frequency, rate or extent of chromosome organization." [GOC:obol]	176	2557	53	21118	0.0207274	0.301136	query_1	['GO:0010638', 'GO:0033044', 'GO:0051276']
265	GO:BP	GO:0010389	regulation of G2/M transition of mitotic cell cycle	3.6185e-07	TRUE	"Any signalling pathway that modulates the activity of a cell cycle cyclin-dependent protein kinase to modulate the switch from G2 phase to M phase of the mitotic cell cycle." [GOC:mtg_cell_cycle, PMID:17329565]	83	2557	33	21118	0.0129057	0.39759	query_1	['GO:0000086', 'GO:1901990', 'GO:1902749']
266	GO:BP	GO:0009889	regulation of biosynthetic process	4.63784e-07	TRUE	"Any process that modulates the frequency, rate or extent of the chemical reactions and pathways resulting in the formation of substances." [GOC:go_curators]	4167	2557	626	21118	0.244818	0.150228	query_1	['GO:0009058', 'GO:0019222']
267	GO:BP	GO:0032886	regulation of microtubule-based process	4.85264e-07	TRUE	"Any process that modulates the frequency, rate or extent of any cellular process that depends upon or alters the microtubule cytoskeleton." [GOC:mah]	256	2557	68	21118	0.0265937	0.265625	query_1	['GO:0007017', 'GO:0050794']
268	GO:BP	GO:0043484	regulation of RNA splicing	5.51037e-07	TRUE	"Any process that modulates the frequency, rate or extent of RNA splicing, the process of removing sections of the primary RNA transcript to remove sequences not present in the mature form of the RNA and joining the remaining sections to form the mature form of the RNA." [GOC:jl]	153	2557	48	21118	0.018772	0.313725	query_1	['GO:0008380', 'GO:0010468', 'GO:0051252']
269	GO:BP	GO:0000724	double-strand break repair via homologous recombination	5.54434e-07	TRUE	"The error-free repair of a double-strand break in DNA in which the broken DNA molecule is repaired using homologous sequences. A strand in the broken DNA searches for a homologous region in an intact chromosome to serve as the template for DNA synthesis. The restoration of two intact DNA molecules results in the exchange, reciprocal or nonreciprocal, of genetic material between the intact DNA mo…	129	2557	43	21118	0.0168166	0.333333	query_1	['GO:0000725', 'GO:0006302']
270	GO:BP	GO:0051247	positive regulation of protein metabolic process	5.73379e-07	TRUE	"Any process that activates or increases the frequency, rate or extent of the chemical reactions and pathways involving a protein." [GOC:ai]	1529	2557	266	21118	0.104028	0.17397	query_1	['GO:0010604', 'GO:0019538', 'GO:0051173', 'GO:0051246']
271	GO:BP	GO:0015931	nucleobase-containing compound transport	6.10218e-07	TRUE	"The directed movement of nucleobases, nucleosides, nucleotides and nucleic acids, into, out of or within a cell, or between cells, by means of some agent such as a transporter or pore." [GOC:ai]	204	2557	58	21118	0.0226828	0.284314	query_1	['GO:0071702', 'GO:0071705']
272	GO:BP	GO:0044270	cellular nitrogen compound catabolic process	6.4171e-07	TRUE	"The chemical reactions and pathways resulting in the breakdown of organic and inorganic nitrogenous compounds." [GOC:jl, ISBN:0198506732]	411	2557	95	21118	0.0371529	0.231144	query_1	['GO:0034641', 'GO:0044248']
273	GO:BP	GO:0006270	DNA replication initiation	6.7962e-07	TRUE	"The process in which DNA-dependent DNA replication is started; this begins with the ATP dependent loading of an initiator complex onto the DNA, this is followed by DNA melting and helicase activity. In bacteria, the gene products that enable the helicase activity are loaded after the initial melting and in archaea and eukaryotes, the gene products that enable the helicase activity are inactive w…	29	2557	18	21118	0.0070395	0.62069	query_1	['GO:0006259', 'GO:0006261']
274	GO:BP	GO:1903312	negative regulation of mRNA metabolic process	6.87165e-07	TRUE	"Any process that stops, prevents or reduces the frequency, rate or extent of mRNA metabolic process." [GO_REF:0000058, GOC:TermGenie, GOC:vw]	89	2557	34	21118	0.0132968	0.382022	query_1	['GO:0016071', 'GO:0051253', 'GO:1903311']
275	GO:BP	GO:1903827	regulation of cellular protein localization	7.37437e-07	TRUE	"Any process that modulates the frequency, rate or extent of cellular protein localization. Cellular protein localization is any process in which a protein is transported to, and/or maintained in, a specific location and encompasses movement within the cell, from within the cell to the cell surface, or from one location to another at the surface of a cell." [GO_REF:0000058, GOC:TermGenie, GOC:vw]	557	2557	119	21118	0.0465389	0.213645	query_1	['GO:0032880', 'GO:0034613', 'GO:0060341']
276	GO:BP	GO:0048024	regulation of mRNA splicing, via spliceosome	7.65906e-07	TRUE	"Any process that modulates the frequency, rate or extent of mRNA splicing via a spliceosomal mechanism." [GOC:jid]	107	2557	38	21118	0.0148612	0.35514	query_1	['GO:0000398', 'GO:0043484', 'GO:0050684']
277	GO:BP	GO:0034660	ncRNA metabolic process	8.81663e-07	TRUE	"The chemical reactions and pathways involving non-coding RNA transcripts (ncRNAs)." [GOC:mah]	449	2557	101	21118	0.0394994	0.224944	query_1	['GO:0016070']
278	GO:BP	GO:0090329	regulation of DNA-dependent DNA replication	9.28125e-07	TRUE	"Any process that modulates the rate, frequency, or extent of DNA-dependent DNA replication, the process in which new strands of DNA are synthesized, using parental DNA as a template for the DNA-dependent DNA polymerases that synthesize the new strands." [GOC:dph, GOC:tb]	46	2557	23	21118	0.00899492	0.5	query_1	['GO:0006261', 'GO:0006275']
279	GO:BP	GO:0006402	mRNA catabolic process	1.01756e-06	TRUE	"The chemical reactions and pathways resulting in the breakdown of mRNA, messenger RNA, which is responsible for carrying the coded genetic 'message', transcribed from DNA, to sites of protein assembly at the ribosomes." [ISBN:0198506732]	217	2557	60	21118	0.023465	0.276498	query_1	['GO:0006401', 'GO:0010629', 'GO:0016071']
280	GO:BP	GO:0010499	proteasomal ubiquitin-independent protein catabolic process	1.12474e-06	TRUE	"The chemical reactions and pathways resulting in the breakdown of a protein or peptide by hydrolysis of its peptide bonds that is mediated by the proteasome but do not involve ubiquitin." [GOC:tb]	21	2557	15	21118	0.00586625	0.714286	query_1	['GO:0010498']
281	GO:BP	GO:0046700	heterocycle catabolic process	1.25759e-06	TRUE	"The chemical reactions and pathways resulting in the breakdown of heterocyclic compounds, those with a cyclic molecular structure and at least two different atoms in the ring (or rings)." [GOC:ai]	410	2557	94	21118	0.0367618	0.229268	query_1	['GO:0044248', 'GO:0046483']
282	GO:BP	GO:0097435	supramolecular fiber organization	1.51206e-06	TRUE	"A process that is carried out at the cellular level which results in the assembly, arrangement of constituent parts, or disassembly of a supramolecular fiber, a polymer consisting of an indefinite number of protein or protein complex subunits that have polymerised to form a fiber-shaped structure." [GOC:pr]	734	2557	146	21118	0.0570982	0.19891	query_1	['GO:0016043']
283	GO:BP	GO:0051234	establishment of localization	1.68909e-06	TRUE	"Any process that localizes a substance or cellular component. This may occur via movement, tethering or selective degradation." [GOC:ai, GOC:dos]	4658	2557	686	21118	0.268283	0.147274	query_1	['GO:0051179']
284	GO:BP	GO:0032270	positive regulation of cellular protein metabolic process	1.73717e-06	TRUE	"Any process that activates or increases the frequency, rate or extent of the chemical reactions and pathways involving a protein, occurring at the level of an individual cell." [GOC:mah]	1448	2557	252	21118	0.098553	0.174033	query_1	['GO:0031325', 'GO:0032268', 'GO:0044267', 'GO:0051247']
285	GO:BP	GO:0051099	positive regulation of binding	1.97726e-06	TRUE	"Any process that activates or increases the rate or extent of binding, the selective interaction of a molecule with one or more specific sites on another molecule." [GOC:ai]	194	2557	55	21118	0.0215096	0.283505	query_1	['GO:0044093', 'GO:0051098']
286	GO:BP	GO:0031399	regulation of protein modification process	2.27859e-06	TRUE	"Any process that modulates the frequency, rate or extent of the covalent alteration of one or more amino acid residues within a protein." [GOC:mah, GOC:tb]	1641	2557	279	21118	0.109112	0.170018	query_1	['GO:0006464', 'GO:0032268']
287	GO:BP	GO:0080135	regulation of cellular response to stress	2.27903e-06	TRUE	"Any process that modulates the frequency, rate or extent of a cellular response to stress. Cellular response to stress is a change in state or activity of a cell (in terms of movement, secretion, enzyme production, gene expression, etc.) as a result of a stimulus indicating the organism is under stress. The stress is usually, but not necessarily, exogenous (e.g. temperature, humidity, ionizing r…	636	2557	130	21118	0.0508408	0.204403	query_1	['GO:0033554', 'GO:0050794', 'GO:0080134']
288	GO:BP	GO:1901989	positive regulation of cell cycle phase transition	2.71287e-06	TRUE	"Any process that activates or increases the frequency, rate or extent of cell cycle phase transition." [GOC:mtg_cell_cycle, GOC:TermGenie, PMID:22841721]	102	2557	36	21118	0.014079	0.352941	query_1	['GO:0044770', 'GO:0090068', 'GO:1901987']
289	GO:BP	GO:0007275	multicellular organism development	3.01373e-06	TRUE	"The biological process whose specific outcome is the progression of a multicellular organism over time from an initial condition (e.g. a zygote or a young adult) to a later condition (e.g. a multicellular animal or an aged adult)." [GOC:dph, GOC:ems, GOC:isa_complete, GOC:tb]	5441	2557	785	21118	0.307	0.144275	query_1	['GO:0032501', 'GO:0048856']
290	GO:BP	GO:0051653	spindle localization	3.3833e-06	TRUE	"Any process in which is the spindle is transported to, and/or maintained in, a specific location." [GOC:ai]	56	2557	25	21118	0.00977708	0.446429	query_1	['GO:0022402', 'GO:0051640']
291	GO:BP	GO:2000112	regulation of cellular macromolecule biosynthetic process	3.47687e-06	TRUE	"Any process that modulates the frequency, rate or extent of cellular macromolecule biosynthetic process." [GOC:obol]	3880	2557	582	21118	0.22761	0.15	query_1	['GO:0010556', 'GO:0031326', 'GO:0034645']
292	GO:BP	GO:2000278	regulation of DNA biosynthetic process	3.76871e-06	TRUE	"Any process that modulates the frequency, rate or extent of DNA biosynthetic process." [GOC:obol]	117	2557	39	21118	0.0152522	0.333333	query_1	['GO:0051052', 'GO:0071897', 'GO:2000112']
293	GO:BP	GO:0000245	spliceosomal complex assembly	3.88251e-06	TRUE	"The aggregation, arrangement and bonding together of a spliceosomal complex, a ribonucleoprotein apparatus that catalyzes nuclear mRNA splicing via transesterification reactions." [PMID:9476892]	45	2557	22	21118	0.00860383	0.488889	query_1	['GO:0000398', 'GO:0022618']
294	GO:BP	GO:0007143	female meiotic nuclear division	4.0607e-06	TRUE	"A cell cycle process by which the cell nucleus divides as part of a meiotic cell cycle in the female germline." [GOC:dph, GOC:ems, GOC:mah, GOC:vw]	38	2557	20	21118	0.00782167	0.526316	query_1	['GO:0007292', 'GO:0022412', 'GO:0140013']
295	GO:BP	GO:0006282	regulation of DNA repair	4.29485e-06	TRUE	"Any process that modulates the frequency, rate or extent of DNA repair." [GOC:go_curators]	127	2557	41	21118	0.0160344	0.322835	query_1	['GO:0006281', 'GO:0051052', 'GO:2001020']
296	GO:BP	GO:0048856	anatomical structure development	4.78874e-06	TRUE	"The biological process whose specific outcome is the progression of an anatomical structure from an initial condition to its mature state. This process begins with the formation of the structure and ends with the mature structure, whatever form that may be including its natural destruction. An anatomical structure is any biological entity that occupies space and is distinguished from its surroun…	5987	2557	853	21118	0.333594	0.142475	query_1	['GO:0032502']
297	GO:BP	GO:0032880	regulation of protein localization	4.85331e-06	TRUE	"Any process that modulates the frequency, rate or extent of any process in which a protein is transported to, or maintained in, a specific location." [GOC:dph, GOC:mah, GOC:tb]	917	2557	172	21118	0.0672663	0.187568	query_1	['GO:0008104', 'GO:0032879']
298	GO:BP	GO:0033260	nuclear DNA replication	5.22533e-06	TRUE	"The DNA-dependent DNA replication that occurs in the nucleus of eukaryotic organisms as part of the cell cycle." [GOC:mtg_cell_cycle]	35	2557	19	21118	0.00743058	0.542857	query_1	['GO:0044786']
299	GO:BP	GO:0010556	regulation of macromolecule biosynthetic process	5.30337e-06	TRUE	"Any process that modulates the rate, frequency or extent of the chemical reactions and pathways resulting in the formation of a macromolecule, any molecule of high relative molecular mass, the structure of which essentially comprises the multiple repetition of units derived, actually or conceptually, from molecules of low relative molecular mass." [GOC:dph, GOC:tb]	3913	2557	585	21118	0.228784	0.149502	query_1	['GO:0009059', 'GO:0009889', 'GO:0060255']
300	GO:BP	GO:0007099	centriole replication	5.41311e-06	TRUE	"The cell cycle process in which a daughter centriole is formed perpendicular to an existing centriole. An immature centriole contains a ninefold radially symmetric array of single microtubules; mature centrioles consist of a radial array of nine microtubule triplets, doublets, or singlets depending upon the species and cell type. Duplicated centrioles also become the ciliary basal body in cells …	42	2557	21	21118	0.00821275	0.5	query_1	['GO:0022402', 'GO:0051298', 'GO:0098534']
301	GO:BP	GO:1901361	organic cyclic compound catabolic process	5.8744e-06	TRUE	"The chemical reactions and pathways resulting in the breakdown of organic cyclic compound." [GOC:TermGenie]	458	2557	100	21118	0.0391083	0.218341	query_1	['GO:1901360', 'GO:1901575']
302	GO:BP	GO:0061640	cytoskeleton-dependent cytokinesis	6.00479e-06	TRUE	"A cytokinesis that involves the function of a set of proteins that are part of the microfilament or microtubule cytoskeleton." [GOC:dph]	91	2557	33	21118	0.0129057	0.362637	query_1	['GO:0000910']
303	GO:BP	GO:0045931	positive regulation of mitotic cell cycle	6.08692e-06	TRUE	"Any process that activates or increases the rate or extent of progression through the mitotic cell cycle." [GOC:dph, GOC:go_curators, GOC:tb]	114	2557	38	21118	0.0148612	0.333333	query_1	['GO:0000278', 'GO:0007346', 'GO:0045787']
304	GO:BP	GO:0051168	nuclear export	7.65696e-06	TRUE	"The directed movement of substances out of the nucleus." [GOC:ai]	154	2557	46	21118	0.0179898	0.298701	query_1	['GO:0006913']
305	GO:BP	GO:0006275	regulation of DNA replication	8.98635e-06	TRUE	"Any process that modulates the frequency, rate or extent of DNA replication." [GOC:go_curators]	106	2557	36	21118	0.014079	0.339623	query_1	['GO:0006260', 'GO:2000112']
306	GO:BP	GO:0019439	aromatic compound catabolic process	1.00518e-05	TRUE	"The chemical reactions and pathways resulting in the breakdown of aromatic compounds, any substance containing an aromatic carbon ring." [GOC:ai]	432	2557	95	21118	0.0371529	0.219907	query_1	['GO:0006725', 'GO:0044248']
307	GO:BP	GO:0051293	establishment of spindle localization	1.20767e-05	TRUE	"The directed movement of the spindle to a specific location in the cell." [GOC:ai]	51	2557	23	21118	0.00899492	0.45098	query_1	['GO:0000226', 'GO:0051649', 'GO:0051653', 'GO:0051656']
308	GO:BP	GO:0007062	sister chromatid cohesion	1.26555e-05	TRUE	"The cell cycle process in which the sister chromatids of a replicated chromosome become tethered to each other." [GOC:jh, GOC:mah, ISBN:0815316194]	55	2557	24	21118	0.009386	0.436364	query_1	['GO:0000819', 'GO:0022402', 'GO:0051276']
309	GO:BP	GO:1902115	regulation of organelle assembly	1.27649e-05	TRUE	"Any process that modulates the frequency, rate or extent of organelle assembly." [GOC:pr, GOC:TermGenie]	198	2557	54	21118	0.0211185	0.272727	query_1	['GO:0033043', 'GO:0044087', 'GO:0070925']
310	GO:BP	GO:0034470	ncRNA processing	1.46881e-05	TRUE	"Any process that results in the conversion of one or more primary non-coding RNA (ncRNA) transcripts into one or more mature ncRNA molecules." [GOC:mah]	363	2557	83	21118	0.0324599	0.22865	query_1	['GO:0006396', 'GO:0034660']
311	GO:BP	GO:0050686	negative regulation of mRNA processing	1.54339e-05	TRUE	"Any process that stops, prevents, or reduces the frequency, rate or extent of mRNA processing." [GOC:ai]	30	2557	17	21118	0.00664842	0.566667	query_1	['GO:0006397', 'GO:0050684', 'GO:1903312']
312	GO:BP	GO:0018394	peptidyl-lysine acetylation	1.60709e-05	TRUE	"The acetylation of peptidyl-lysine." [GOC:mah]	178	2557	50	21118	0.0195542	0.280899	query_1	['GO:0006473', 'GO:0018205']
313	GO:BP	GO:1901293	nucleoside phosphate biosynthetic process	1.66814e-05	TRUE	"The chemical reactions and pathways resulting in the formation of a nucleoside phosphate." [GOC:TermGenie]	232	2557	60	21118	0.023465	0.258621	query_1	['GO:0006753', 'GO:0034654', 'GO:0090407']
314	GO:BP	GO:1901992	positive regulation of mitotic cell cycle phase transition	1.78635e-05	TRUE	"Any process that activates or increases the frequency, rate or extent of mitotic cell cycle phase transition." [GOC:mtg_cell_cycle, GOC:TermGenie, PMID:22841721]	81	2557	30	21118	0.0117325	0.37037	query_1	['GO:0044772', 'GO:0045931', 'GO:1901989', 'GO:1901990']
315	GO:BP	GO:0006417	regulation of translation	1.94324e-05	TRUE	"Any process that modulates the frequency, rate or extent of the chemical reactions and pathways resulting in the formation of proteins by the translation of mRNA or circRNA." [GOC:isa_complete]	377	2557	85	21118	0.0332421	0.225464	query_1	['GO:0006412', 'GO:0010608', 'GO:0032268', 'GO:0034248', 'GO:2000112']
316	GO:BP	GO:0032502	developmental process	2.05069e-05	TRUE	"A biological process whose specific outcome is the progression of an integrated living unit: an anatomical structure (which may be a subcellular structure, cell, tissue, or organ), or organism over time from an initial condition to a later condition." [GOC:isa_complete]	6536	2557	917	21118	0.358623	0.1403	query_1	['GO:0008150']
317	GO:BP	GO:0045934	negative regulation of nucleobase-containing compound metabolic process	2.05214e-05	TRUE	"Any cellular process that stops, prevents, or reduces the frequency, rate or extent of the chemical reactions and pathways involving nucleobases, nucleosides, nucleotides and nucleic acids." [GOC:go_curators]	1606	2557	269	21118	0.105201	0.167497	query_1	['GO:0006139', 'GO:0019219', 'GO:0031324', 'GO:0051172']
318	GO:BP	GO:0006473	protein acetylation	2.10318e-05	TRUE	"The addition of an acetyl group to a protein amino acid. An acetyl group is CH3CO-, derived from acetic [ethanoic] acid." [GOC:ai]	206	2557	55	21118	0.0215096	0.26699	query_1	['GO:0043543']
319	GO:BP	GO:0051302	regulation of cell division	2.25838e-05	TRUE	"Any process that modulates the frequency, rate or extent of the physical partitioning and separation of a cell into daughter cells." [GOC:go_curators]	164	2557	47	21118	0.0183809	0.286585	query_1	['GO:0050794', 'GO:0051301']
320	GO:BP	GO:0071166	ribonucleoprotein complex localization	2.28273e-05	TRUE	"Any process in which a ribonucleoprotein complex is transported to, or maintained in, a specific location within a cell." [GOC:mah]	73	2557	28	21118	0.0109503	0.383562	query_1	['GO:0051641']
321	GO:BP	GO:0009165	nucleotide biosynthetic process	2.58388e-05	TRUE	"The chemical reactions and pathways resulting in the formation of nucleotides, any nucleoside that is esterified with (ortho)phosphate or an oligophosphate at any hydroxyl group on the glycose moiety; may be mono-, di- or triphosphate; this definition includes cyclic-nucleotides (nucleoside cyclic phosphates)." [GOC:go_curators]	229	2557	59	21118	0.0230739	0.257642	query_1	['GO:0009117', 'GO:1901293']
322	GO:BP	GO:0016573	histone acetylation	2.90107e-05	TRUE	"The modification of a histone by the addition of an acetyl group." [GOC:ai]	160	2557	46	21118	0.0179898	0.2875	query_1	['GO:0016570', 'GO:0018393']
323	GO:BP	GO:0010212	response to ionizing radiation	2.99793e-05	TRUE	"Any process that results in a change in state or activity of a cell or an organism (in terms of movement, secretion, enzyme production, gene expression, etc.) as a result of a ionizing radiation stimulus. Ionizing radiation is radiation with sufficient energy to remove electrons from atoms and may arise from spontaneous decay of unstable isotopes, resulting in alpha and beta particles and gamma …	155	2557	45	21118	0.0175987	0.290323	query_1	['GO:0009314']
324	GO:BP	GO:0000387	spliceosomal snRNP assembly	3.03092e-05	TRUE	"The aggregation, arrangement and bonding together of one or more snRNA and multiple protein components to form a ribonucleoprotein complex that is involved in formation of the spliceosome." [GOC:krc, GOC:mah, ISBN:0879695897]	31	2557	17	21118	0.00664842	0.548387	query_1	['GO:0000398', 'GO:0022618']
325	GO:BP	GO:0018393	internal peptidyl-lysine acetylation	3.44131e-05	TRUE	"The addition of an acetyl group to a non-terminal lysine residue in a protein." [GOC:mah]	166	2557	47	21118	0.0183809	0.283133	query_1	['GO:0006475', 'GO:0018394']
326	GO:BP	GO:0006475	internal protein amino acid acetylation	3.44131e-05	TRUE	"The addition of an acetyl group to a non-terminal amino acid in a protein." [GOC:mah]	166	2557	47	21118	0.0183809	0.283133	query_1	['GO:0006473']
327	GO:BP	GO:0043161	proteasome-mediated ubiquitin-dependent protein catabolic process	3.62618e-05	TRUE	"The chemical reactions and pathways resulting in the breakdown of a protein or peptide by hydrolysis of its peptide bonds, initiated by the covalent attachment of ubiquitin, and mediated by the proteasome." [GOC:go_curators]	406	2557	89	21118	0.0348064	0.219212	query_1	['GO:0006511', 'GO:0010498']
328	GO:BP	GO:0018205	peptidyl-lysine modification	3.70633e-05	TRUE	"The modification of peptidyl-lysine." [GOC:go_curators]	382	2557	85	21118	0.0332421	0.222513	query_1	['GO:0018193']
329	GO:BP	GO:0006338	chromatin remodeling	3.72427e-05	TRUE	"Dynamic structural changes to eukaryotic chromatin occurring throughout the cell division cycle. These changes range from the local changes necessary for transcriptional regulation to global changes necessary for chromosome segregation." [GOC:jid, GOC:vw, PMID:12697820]	156	2557	45	21118	0.0175987	0.288462	query_1	['GO:0006325']
330	GO:BP	GO:0006333	chromatin assembly or disassembly	3.80761e-05	TRUE	"The formation or destruction of chromatin structures." [GOC:mah]	177	2557	49	21118	0.0191631	0.276836	query_1	['GO:0006325']
331	GO:BP	GO:0051321	meiotic cell cycle	4.18112e-05	TRUE	"Progression through the phases of the meiotic cell cycle, in which canonically a cell replicates to produce four offspring with half the chromosomal content of the progenitor cell via two nuclear divisions." [GOC:ai]	353	2557	80	21118	0.0312867	0.226629	query_1	['GO:0007049', 'GO:0022414']
332	GO:BP	GO:0010498	proteasomal protein catabolic process	4.28585e-05	TRUE	"The chemical reactions and pathways resulting in the breakdown of a protein or peptide by hydrolysis of its peptide bonds that is mediated by the proteasome." [GOC:tb]	475	2557	100	21118	0.0391083	0.210526	query_1	['GO:0030163', 'GO:0051603']
333	GO:BP	GO:0098534	centriole assembly	4.30145e-05	TRUE	"A cellular process that results in the assembly of one or more centrioles." [GOC:dos, PMID:24075808]	46	2557	21	21118	0.00821275	0.456522	query_1	['GO:0031023', 'GO:0070925']
334	GO:BP	GO:1901575	organic substance catabolic process	4.32556e-05	TRUE	"The chemical reactions and pathways resulting in the breakdown of an organic substance, any molecular entity containing carbon." [GOC:pr, GOC:TermGenie]	1985	2557	320	21118	0.125147	0.161209	query_1	['GO:0009056', 'GO:0071704']
335	GO:BP	GO:0048025	negative regulation of mRNA splicing, via spliceosome	4.3508e-05	TRUE	"Any process that stops, prevents or reduces the rate or extent of mRNA splicing via a spliceosomal mechanism." [GOC:jid]	22	2557	14	21118	0.00547517	0.636364	query_1	['GO:0000398', 'GO:0033119', 'GO:0048024', 'GO:0050686']
336	GO:BP	GO:0009628	response to abiotic stimulus	4.48637e-05	TRUE	"Any process that results in a change in state or activity of a cell or an organism (in terms of movement, secretion, enzyme production, gene expression, etc.) as a result of an abiotic (not derived from living organisms) stimulus." [GOC:hb]	1177	2557	206	21118	0.0805632	0.175021	query_1	['GO:0050896']
337	GO:BP	GO:0051315	attachment of mitotic spindle microtubules to kinetochore	5.15399e-05	TRUE	"The cell cycle process in which spindle microtubules become physically associated with the proteins making up the kinetochore complex as part of mitotic metaphase plate congression." [GOC:ai, GOC:clt, GOC:dph, GOC:tb, PMID:26258632, PMID:26705896]	14	2557	11	21118	0.00430192	0.785714	query_1	['GO:0007080', 'GO:0008608', 'GO:1903047']
338	GO:BP	GO:0007399	nervous system development	5.44692e-05	TRUE	"The process whose specific outcome is the progression of nervous tissue over time, from its formation to its mature state." [GOC:dgh]	2421	2557	379	21118	0.148221	0.156547	query_1	['GO:0048731']
339	GO:BP	GO:0048731	system development	5.65624e-05	TRUE	"The process whose specific outcome is the progression of an organismal system over time, from its formation to the mature structure. A system is a regularly interacting or interdependent group of organs or tissues that work together to carry out a given biological process." [GOC:dph, GOC:jid]	4876	2557	702	21118	0.27454	0.14397	query_1	['GO:0007275', 'GO:0048856']
340	GO:BP	GO:0071702	organic substance transport	6.09797e-05	TRUE	"The directed movement of organic substances into, out of or within a cell, or between cells, or within a multicellular organism by means of some agent such as a transporter or pore. An organic substance is a molecular entity that contains carbon." [GOC:mah]	2416	2557	378	21118	0.147829	0.156457	query_1	['GO:0006810']
341	GO:BP	GO:2001022	positive regulation of response to DNA damage stimulus	6.10425e-05	TRUE	"Any process that activates or increases the frequency, rate or extent of response to DNA damage stimulus." [GOC:obol]	113	2557	36	21118	0.014079	0.318584	query_1	['GO:0006974', 'GO:0048522', 'GO:0048584', 'GO:2001020']
342	GO:BP	GO:0009142	nucleoside triphosphate biosynthetic process	6.49967e-05	TRUE	"The chemical reactions and pathways resulting in the formation of a nucleoside triphosphate, a compound consisting of a nucleobase linked to a deoxyribose or ribose sugar esterified with triphosphate on the sugar." [GOC:go_curators, ISBN:0198506732]	85	2557	30	21118	0.0117325	0.352941	query_1	['GO:0009141', 'GO:1901293']
343	GO:BP	GO:0050790	regulation of catalytic activity	6.8528e-05	TRUE	"Any process that modulates the activity of an enzyme." [GOC:ai, GOC:ebc, GOC:vw]	2308	2557	363	21118	0.141963	0.157279	query_1	['GO:0065009']
344	GO:BP	GO:1902903	regulation of supramolecular fiber organization	6.93849e-05	TRUE	"Any process that modulates the frequency, rate or extent of supramolecular fiber organization." [GO_REF:0000058, GOC:PARL, GOC:rl, GOC:TermGenie, PMID:23921388]	387	2557	85	21118	0.0332421	0.219638	query_1	['GO:0051128', 'GO:0097435']
345	GO:BP	GO:0070507	regulation of microtubule cytoskeleton organization	7.33697e-05	TRUE	"Any process that modulates the frequency, rate or extent of the formation, arrangement of constituent parts, or disassembly of cytoskeletal structures comprising microtubules and their associated proteins." [GOC:mah]	154	2557	44	21118	0.0172077	0.285714	query_1	['GO:0000226', 'GO:0032886', 'GO:0051493']
346	GO:BP	GO:0071426	ribonucleoprotein complex export from nucleus	7.3518e-05	TRUE	"The directed movement of a ribonucleoprotein complex from the nucleus to the cytoplasm." [GOC:mah]	72	2557	27	21118	0.0105592	0.375	query_1	['GO:0031503', 'GO:0051168', 'GO:0071166']
347	GO:BP	GO:0040001	establishment of mitotic spindle localization	7.6735e-05	TRUE	"The cell cycle process in which the directed movement of the mitotic spindle to a specific location in the cell occurs." [GOC:ai]	36	2557	18	21118	0.0070395	0.5	query_1	['GO:0051293', 'GO:1902850']
348	GO:BP	GO:0040007	growth	7.70608e-05	TRUE	"The increase in size or mass of an entire organism, a part of an organism or a cell." [GOC:bf, GOC:ma]	1013	2557	181	21118	0.0707861	0.178677	query_1	['GO:0008150']
349	GO:BP	GO:0034248	regulation of cellular amide metabolic process	8.81937e-05	TRUE	"Any process that modulates the frequency, rate or extent of the chemical reactions and pathways involving amides." [GOC:mah]	438	2557	93	21118	0.0363707	0.212329	query_1	['GO:0031323', 'GO:0043603', 'GO:0051171']
350	GO:BP	GO:0007163	establishment or maintenance of cell polarity	9.53583e-05	TRUE	"Any cellular process that results in the specification, formation or maintenance of anisotropic intracellular organization or cell growth patterns." [GOC:mah]	220	2557	56	21118	0.0219007	0.254545	query_1	['GO:0009987']
351	GO:BP	GO:0010941	regulation of cell death	9.60883e-05	TRUE	"Any process that modulates the rate or frequency of cell death. Cell death is the specific activation or halting of processes within a cell so that its vital functions markedly cease, rather than simply deteriorating gradually over time, which culminates in cell death." [GOC:dph, GOC:tb]	1740	2557	284	21118	0.111068	0.163218	query_1	['GO:0008219', 'GO:0050794']
352	GO:BP	GO:0022008	neurogenesis	9.6235e-05	TRUE	"Generation of cells within the nervous system." [GO_REF:0000021, GOC:cls, GOC:curators, GOC:dgh, GOC:dph, GOC:jid]	1776	2557	289	21118	0.113023	0.162725	query_1	['GO:0007399', 'GO:0030154']
353	GO:BP	GO:0044248	cellular catabolic process	9.80282e-05	TRUE	"The chemical reactions and pathways resulting in the breakdown of substances, carried out by individual cells." [GOC:jl]	2059	2557	328	21118	0.128275	0.159301	query_1	['GO:0009056', 'GO:0044237']
354	GO:BP	GO:0043632	modification-dependent macromolecule catabolic process	0.000105114	TRUE	"The chemical reactions and pathways resulting in the breakdown of a macromolecule, initiated by covalent modification of the target molecule." [GOC:jl]	630	2557	123	21118	0.0481032	0.195238	query_1	['GO:0044265']
355	GO:BP	GO:0009141	nucleoside triphosphate metabolic process	0.000130267	TRUE	"The chemical reactions and pathways involving a nucleoside triphosphate, a compound consisting of a nucleobase linked to a deoxyribose or ribose sugar esterified with triphosphate on the sugar." [GOC:go_curators, ISBN:0198506732]	116	2557	36	21118	0.014079	0.310345	query_1	['GO:0006753']
356	GO:BP	GO:0009890	negative regulation of biosynthetic process	0.000133268	TRUE	"Any process that stops, prevents, or reduces the rate of the chemical reactions and pathways resulting in the formation of substances." [GOC:go_curators]	1746	2557	284	21118	0.111068	0.162658	query_1	['GO:0009058', 'GO:0009889', 'GO:0009892']
357	GO:BP	GO:0022411	cellular component disassembly	0.000161945	TRUE	"A cellular process that results in the breakdown of a cellular component." [GOC:isa_complete]	394	2557	85	21118	0.0332421	0.215736	query_1	['GO:0016043']
358	GO:BP	GO:0006511	ubiquitin-dependent protein catabolic process	0.000166284	TRUE	"The chemical reactions and pathways resulting in the breakdown of a protein or peptide by hydrolysis of its peptide bonds, initiated by the covalent attachment of a ubiquitin group, or multiple ubiquitin groups, to the protein." [GOC:go_curators]	609	2557	119	21118	0.0465389	0.195402	query_1	['GO:0019941']
359	GO:BP	GO:0051382	kinetochore assembly	0.000171958	TRUE	"The aggregation, arrangement and bonding together of a set of components to form the kinetochore, a multisubunit complex that is located at the centromeric region of DNA and provides an attachment point for the spindle microtubules." [GOC:ai]	15	2557	11	21118	0.00430192	0.733333	query_1	['GO:0034508', 'GO:0034622', 'GO:0051383', 'GO:0070925']
360	GO:BP	GO:0051254	positive regulation of RNA metabolic process	0.000186159	TRUE	"Any process that activates or increases the frequency, rate or extent of the chemical reactions and pathways involving RNA." [GOC:ai]	1745	2557	283	21118	0.110677	0.162178	query_1	['GO:0010604', 'GO:0016070', 'GO:0045935', 'GO:0051252']
361	GO:BP	GO:0034504	protein localization to nucleus	0.000218976	TRUE	"A process in which a protein transports or maintains the localization of another protein to the nucleus." [GOC:ecd]	306	2557	70	21118	0.0273758	0.228758	query_1	['GO:0033365']
362	GO:BP	GO:0006284	base-excision repair	0.000223251	TRUE	"In base excision repair, an altered base is removed by a DNA glycosylase enzyme, followed by excision of the resulting sugar phosphate. The small gap left in the DNA helix is filled in by the sequential action of DNA polymerase and DNA ligase." [ISBN:0815316194]	38	2557	18	21118	0.0070395	0.473684	query_1	['GO:0006281']
363	GO:BP	GO:0030030	cell projection organization	0.000224023	TRUE	"A process that is carried out at the cellular level which results in the assembly, arrangement of constituent parts, or disassembly of a prolongation or process extending from a cell, e.g. a flagellum or axon." [GOC:jl, GOC:mah, http://www.cogsci.princeton.edu/~wn/]	1576	2557	259	21118	0.101291	0.16434	query_1	['GO:0016043']
364	GO:BP	GO:0045132	meiotic chromosome segregation	0.00024588	TRUE	"The process in which genetic material, in the form of chromosomes, is organized into specific structures and then physically separated and apportioned to two or more sets during M phase of the meiotic cell cycle." [GOC:ai, GOC:mah]	99	2557	32	21118	0.0125147	0.323232	query_1	['GO:0098813', 'GO:0140013', 'GO:1903046']
365	GO:BP	GO:0009894	regulation of catabolic process	0.000252018	TRUE	"Any process that modulates the frequency, rate, or extent of the chemical reactions and pathways resulting in the breakdown of substances." [GOC:go_curators]	893	2557	161	21118	0.0629644	0.180291	query_1	['GO:0009056', 'GO:0019222']
366	GO:BP	GO:0120036	plasma membrane bounded cell projection organization	0.00026353	TRUE	"A process that is carried out at the cellular level which results in the assembly, arrangement of constituent parts, or disassembly of a plasma membrane bounded prolongation or process extending from a cell, e.g. a cilium or axon." [GOC:krc]	1536	2557	253	21118	0.0989441	0.164714	query_1	['GO:0030030']
367	GO:BP	GO:0031497	chromatin assembly	0.00026526	TRUE	"The assembly of DNA, histone proteins, other associated proteins, and sometimes RNA, into chromatin structure, beginning with the formation of the basic unit, the nucleosome, followed by organization of the nucleosomes into higher order structures, ultimately giving rise to a complex organization of specific domains within the nucleus." [http://www.infobiogen.fr/services/chromcancer/IntroItems/C…	155	2557	43	21118	0.0168166	0.277419	query_1	['GO:0006323', 'GO:0006333', 'GO:0022607']
368	GO:BP	GO:0019941	modification-dependent protein catabolic process	0.000275422	TRUE	"The chemical reactions and pathways resulting in the breakdown of a protein or peptide by hydrolysis of its peptide bonds, initiated by the covalent modification of the target protein." [GOC:go_curators]	621	2557	120	21118	0.04693	0.193237	query_1	['GO:0043632', 'GO:0051603']
369	GO:BP	GO:0000380	alternative mRNA splicing, via spliceosome	0.000320925	TRUE	"The process of generating multiple mRNA molecules from a given set of exons by differential use of exons from the primary transcript(s) to form multiple mature mRNAs that vary in their exon composition." [GOC:krc, PMID:12110900]	72	2557	26	21118	0.0101682	0.361111	query_1	['GO:0000398']
370	GO:BP	GO:0007004	telomere maintenance via telomerase	0.000335077	TRUE	"The maintenance of proper telomeric length by the addition of telomeric repeats by telomerase." [GOC:elh]	59	2557	23	21118	0.00899492	0.389831	query_1	['GO:0006278', 'GO:0010833']
371	GO:BP	GO:0051988	regulation of attachment of spindle microtubules to kinetochore	0.000336615	TRUE	"Any process that modulates the frequency, rate or extent of the attachment of spindle microtubules to the kinetochore." [GOC:ai]	13	2557	10	21118	0.00391083	0.769231	query_1	['GO:0008608', 'GO:0010564']
372	GO:BP	GO:0007076	mitotic chromosome condensation	0.000336615	TRUE	"The cell cycle process in which chromatin structure is compacted prior to and during mitosis in eukaryotic cells." [GOC:mah, ISBN:0815316194]	13	2557	10	21118	0.00391083	0.769231	query_1	['GO:0000070', 'GO:0030261', 'GO:1903047']
373	GO:BP	GO:0051252	regulation of RNA metabolic process	0.000336876	TRUE	"Any process that modulates the frequency, rate or extent of the chemical reactions and pathways involving RNA." [GOC:ai]	3691	2557	542	21118	0.211967	0.146844	query_1	['GO:0016070', 'GO:0019219', 'GO:0060255']
374	GO:BP	GO:0010608	posttranscriptional regulation of gene expression	0.000363433	TRUE	"Any process that modulates the frequency, rate or extent of gene expression after the production of an RNA transcript." [GOC:dph, GOC:tb]	598	2557	116	21118	0.0453657	0.19398	query_1	['GO:0010468']
375	GO:BP	GO:0051294	establishment of spindle orientation	0.000367681	TRUE	"Any process that set the alignment of spindle relative to other cellular structures." [GOC:ai]	39	2557	18	21118	0.0070395	0.461538	query_1	['GO:0030010', 'GO:0051293']
376	GO:BP	GO:0051205	protein insertion into membrane	0.000387289	TRUE	"The process that results in the incorporation of a protein into a biological membrane. Incorporation in this context means having some part or covalently attached group that is inserted into the the hydrophobic region of one or both bilayers." [GOC:ai]	51	2557	21	21118	0.00821275	0.411765	query_1	['GO:0034613', 'GO:0061024', 'GO:0090150']
377	GO:BP	GO:0045005	DNA-dependent DNA replication maintenance of fidelity	0.000392729	TRUE	"A DNA metabolic process that prevents or corrects errors to ensure that DNA is replicated accurately. Errors can be corrected either by intrinsic DNA polymerase proofreading activity or via mismatch repair." [GOC:mah, GOC:vw]	43	2557	19	21118	0.00743058	0.44186	query_1	['GO:0006259', 'GO:0006261']
378	GO:BP	GO:0072522	purine-containing compound biosynthetic process	0.000393179	TRUE	"The chemical reactions and pathways resulting in the formation of a purine-containing compound, i.e. any compound that contains purine or a formal derivative thereof." [GOC:mah]	184	2557	48	21118	0.018772	0.26087	query_1	['GO:0018130', 'GO:0019438', 'GO:0044271', 'GO:0072521', 'GO:1901362', 'GO:1901566']
379	GO:BP	GO:0010824	regulation of centrosome duplication	0.000398009	TRUE	"Any process that modulates the frequency, rate or extent of centrosome duplication. Centrosome duplication is the replication of a centrosome, a structure comprised of a pair of centrioles and peri-centriolar material from which a microtubule spindle apparatus is organized." [GOC:dph, GOC:tb]	47	2557	20	21118	0.00782167	0.425532	query_1	['GO:0046605', 'GO:0051298']
380	GO:BP	GO:0030036	actin cytoskeleton organization	0.000426168	TRUE	"A process that is carried out at the cellular level which results in the assembly, arrangement of constituent parts, or disassembly of cytoskeletal structures comprising actin filaments and their associated proteins." [GOC:dph, GOC:jl, GOC:mah]	705	2557	132	21118	0.051623	0.187234	query_1	['GO:0007010', 'GO:0030029']
381	GO:BP	GO:0031327	negative regulation of cellular biosynthetic process	0.000429127	TRUE	"Any process that stops, prevents, or reduces the frequency, rate or extent of the chemical reactions and pathways resulting in the formation of substances, carried out by individual cells." [GOC:mah]	1703	2557	275	21118	0.107548	0.16148	query_1	['GO:0009890', 'GO:0031324', 'GO:0031326', 'GO:0044249']
382	GO:BP	GO:0010833	telomere maintenance via telomere lengthening	0.000441329	TRUE	"Any process that contributes to the maintenance of proper telomeric length and structure by affecting and monitoring the activity of telomeric proteins and lengthening the telomeric DNA." [GOC:dph, GOC:tb]	73	2557	26	21118	0.0101682	0.356164	query_1	['GO:0000723']
383	GO:BP	GO:0043543	protein acylation	0.000465659	TRUE	"The addition of an acyl group, any group or radical of the form RCO- where R is an organic group, to a protein amino acid." [GOC:jl]	247	2557	59	21118	0.0230739	0.238866	query_1	['GO:0006464']
384	GO:BP	GO:0006278	RNA-dependent DNA biosynthetic process	0.000481327	TRUE	"A DNA biosynthetic process that uses RNA as a template for RNA-dependent DNA polymerases (e.g. reverse transcriptase) that synthesize the new strand." [GOC:mah, ISBN:0198506732]	60	2557	23	21118	0.00899492	0.383333	query_1	['GO:0071897']
385	GO:BP	GO:0032970	regulation of actin filament-based process	0.000500387	TRUE	"Any process that modulates the frequency, rate or extent of any cellular process that depends upon or alters the actin cytoskeleton." [GOC:mah]	410	2557	86	21118	0.0336332	0.209756	query_1	['GO:0030029', 'GO:0050794']
386	GO:BP	GO:0016049	cell growth	0.000507048	TRUE	"The process in which a cell irreversibly increases in size over time by accretion and biosynthetic production of matter similar to that already present." [GOC:ai]	492	2557	99	21118	0.0387172	0.20122	query_1	['GO:0009987', 'GO:0040007']
387	GO:BP	GO:0009145	purine nucleoside triphosphate biosynthetic process	0.000517394	TRUE	"The chemical reactions and pathways resulting in the formation of purine nucleoside triphosphate, a compound consisting of a purine base linked to a ribose or deoxyribose sugar esterified with triphosphate on the sugar." [GOC:go_curators, ISBN:0198506732]	69	2557	25	21118	0.00977708	0.362319	query_1	['GO:0009142', 'GO:0009144']
388	GO:BP	GO:0072698	protein localization to microtubule cytoskeleton	0.000532542	TRUE	"A cellular protein localization process in which a protein is transported to, or maintained at, a location within the microtubule cytoskeleton." [GOC:mah]	56	2557	22	21118	0.00860383	0.392857	query_1	['GO:0044380']
389	GO:BP	GO:0030150	protein import into mitochondrial matrix	0.000536318	TRUE	"The import of proteins across the outer and inner mitochondrial membranes into the matrix. Unfolded proteins enter the mitochondrial matrix with a chaperone protein; the information required to target the precursor protein from the cytosol to the mitochondrial matrix is contained within its N-terminal matrix-targeting sequence. Translocation of precursors to the matrix occurs at the rare sites w…	19	2557	12	21118	0.004693	0.631579	query_1	['GO:0006626', 'GO:0044743', 'GO:0065002', 'GO:0072655', 'GO:1990542']
390	GO:BP	GO:0009205	purine ribonucleoside triphosphate metabolic process	0.000559972	TRUE	"The chemical reactions and pathways involving purine ribonucleoside triphosphate, a compound consisting of a purine base linked to a ribose sugar esterified with triphosphate on the sugar." [GOC:go_curators, ISBN:0198506732]	83	2557	28	21118	0.0109503	0.337349	query_1	['GO:0009144', 'GO:0009199']
391	GO:BP	GO:0048699	generation of neurons	0.000563499	TRUE	"The process in which nerve cells are generated. This includes the production of neuroblasts and their differentiation into neurons." [GOC:nln]	1636	2557	265	21118	0.103637	0.16198	query_1	['GO:0022008']
392	GO:BP	GO:0046605	regulation of centrosome cycle	0.000575707	TRUE	"Any process that modulates the frequency, rate or extent of the centrosome cycle, the processes of centrosome duplication and separation." [GOC:ai]	52	2557	21	21118	0.00821275	0.403846	query_1	['GO:0007098', 'GO:0010564', 'GO:0032886', 'GO:0051128']
393	GO:BP	GO:0070203	regulation of establishment of protein localization to telomere	0.000603666	TRUE	"Any process that modulates the frequency, rate or extent of the directed movement of a protein to a specific location in the telomeric region of a chromosome." [GOC:BHF, GOC:mah]	11	2557	9	21118	0.00351975	0.818182	query_1	['GO:0070200', 'GO:0070202', 'GO:1904814']
394	GO:BP	GO:0051248	negative regulation of protein metabolic process	0.000688094	TRUE	"Any process that stops, prevents, or reduces the frequency, rate or extent of chemical reactions and pathways involving a protein." [GOC:ai]	1128	2557	193	21118	0.0754791	0.171099	query_1	['GO:0010605', 'GO:0019538', 'GO:0051172', 'GO:0051246']
395	GO:BP	GO:0017038	protein import	0.000698987	TRUE	"The targeting and directed movement of proteins into a cell or organelle. Not all import involves an initial targeting event." [GOC:ai]	221	2557	54	21118	0.0211185	0.244344	query_1	['GO:0015031']
396	GO:BP	GO:0030029	actin filament-based process	0.000725858	TRUE	"Any cellular process that depends upon or alters the actin cytoskeleton, that part of the cytoskeleton comprising actin filaments and their associated proteins." [GOC:mah]	792	2557	144	21118	0.056316	0.181818	query_1	['GO:0009987']
397	GO:BP	GO:0000132	establishment of mitotic spindle orientation	0.000778771	TRUE	"A cell cycle process that sets the alignment of mitotic spindle relative to other cellular structures." [GOC:ems]	33	2557	16	21118	0.00625733	0.484848	query_1	['GO:0040001', 'GO:0051294']
398	GO:BP	GO:0051258	protein polymerization	0.000811437	TRUE	"The process of creating protein polymers, compounds composed of a large number of component monomers; polymeric proteins may be made up of different or identical monomers. Polymerization occurs by the addition of extra monomers to an existing poly- or oligomeric protein." [GOC:ai]	304	2557	68	21118	0.0265937	0.223684	query_1	['GO:0034622']
399	GO:BP	GO:0006405	RNA export from nucleus	0.000816443	TRUE	"The directed movement of RNA from the nucleus to the cytoplasm." [GOC:ma]	75	2557	26	21118	0.0101682	0.346667	query_1	['GO:0050658', 'GO:0051168']
400	GO:BP	GO:0009056	catabolic process	0.000818689	TRUE	"The chemical reactions and pathways resulting in the breakdown of substances, including the breakdown of carbon compounds with the liberation of energy for use by the cell or organism." [ISBN:0198547684]	2399	2557	368	21118	0.143919	0.153397	query_1	['GO:0008152']
401	GO:BP	GO:2000113	negative regulation of cellular macromolecule biosynthetic process	0.000833961	TRUE	"Any process that stops, prevents, or reduces the frequency, rate or extent of cellular macromolecule biosynthetic process." [GOC:obol]	1629	2557	263	21118	0.102855	0.161449	query_1	['GO:0010558', 'GO:0031327', 'GO:0034645', 'GO:2000112']
402	GO:BP	GO:0042981	regulation of apoptotic process	0.000845023	TRUE	"Any process that modulates the occurrence or rate of cell death by apoptotic process." [GOC:jl, GOC:mtg_apoptosis]	1550	2557	252	21118	0.098553	0.162581	query_1	['GO:0006915', 'GO:0043067']
403	GO:BP	GO:0051338	regulation of transferase activity	0.000854197	TRUE	"Any process that modulates the frequency, rate or extent of transferase activity, the catalysis of the transfer of a group, e.g. a methyl group, glycosyl group, acyl group, phosphorus-containing, or other groups, from one compound (generally regarded as the donor) to another compound (generally regarded as the acceptor). Transferase is the systematic name for any enzyme of EC class 2." [EC:2.-.-…	951	2557	167	21118	0.0653109	0.175605	query_1	['GO:0050790']
404	GO:BP	GO:0044089	positive regulation of cellular component biogenesis	0.000862891	TRUE	"Any process that activates or increases the frequency, rate or extent of cellular component biogenesis, a process that results in the biosynthesis of constituent macromolecules, assembly, and arrangement of constituent parts of a cellular component." [GOC:jl]	536	2557	105	21118	0.0410637	0.195896	query_1	['GO:0044085', 'GO:0044087', 'GO:0048522']
405	GO:BP	GO:0031055	chromatin remodeling at centromere	0.000918992	TRUE	"Dynamic structural changes in centromeric DNA." [GOC:mah]	9	2557	8	21118	0.00312867	0.888889	query_1	['GO:0006338']
406	GO:BP	GO:0070199	establishment of protein localization to chromosome	0.00102508	TRUE	"The directed movement of a protein to a specific location on a chromosome." [GOC:BHF, GOC:mah]	23	2557	13	21118	0.00508408	0.565217	query_1	['GO:0034502', 'GO:0072594']
407	GO:BP	GO:0031109	microtubule polymerization or depolymerization	0.00103828	TRUE	"Assembly or disassembly of microtubules by the addition or removal of tubulin heterodimers from a microtubule." [GOC:mah]	125	2557	36	21118	0.014079	0.288	query_1	['GO:0000226']
408	GO:BP	GO:0006796	phosphate-containing compound metabolic process	0.00103917	TRUE	"The chemical reactions and pathways involving the phosphate group, the anion or salt of any phosphoric acid." [GOC:ai]	2809	2557	422	21118	0.165037	0.150231	query_1	['GO:0006793']
409	GO:BP	GO:0042770	signal transduction in response to DNA damage	0.00104255	TRUE	"A cascade of processes induced by the detection of DNA damage within a cell." [GOC:go_curators]	146	2557	40	21118	0.0156433	0.273973	query_1	['GO:0006974', 'GO:0035556']
410	GO:BP	GO:0051253	negative regulation of RNA metabolic process	0.00112414	TRUE	"Any process that stops, prevents, or reduces the frequency, rate or extent of the chemical reactions and pathways involving RNA." [GOC:ai]	1505	2557	245	21118	0.0958154	0.162791	query_1	['GO:0010605', 'GO:0016070', 'GO:0045934', 'GO:0051252']
411	GO:BP	GO:0006950	response to stress	0.00114114	TRUE	"Any process that results in a change in state or activity of a cell or an organism (in terms of movement, secretion, enzyme production, gene expression, etc.) as a result of a disturbance in organismal or cellular homeostasis, usually, but not necessarily, exogenous (e.g. temperature, humidity, ionizing radiation)." [GOC:mah]	3817	2557	554	21118	0.21666	0.14514	query_1	['GO:0050896']
412	GO:BP	GO:0010558	negative regulation of macromolecule biosynthetic process	0.00118584	TRUE	"Any process that decreases the rate, frequency or extent of the chemical reactions and pathways resulting in the formation of a macromolecule, any molecule of high relative molecular mass, the structure of which essentially comprises the multiple repetition of units derived, actually or conceptually, from molecules of low relative molecular mass." [GOC:dph, GOC:tb]	1643	2557	264	21118	0.103246	0.160682	query_1	['GO:0009059', 'GO:0009890', 'GO:0010556', 'GO:0010605']
413	GO:BP	GO:0035556	intracellular signal transduction	0.00125508	TRUE	"The process in which a signal is passed on to downstream components within the cell, which become activated themselves to further propagate the signal and finally trigger a change in the function or state of the cell." [GOC:bf, GOC:jl, GOC:signaling, ISBN:3527303782]	2491	2557	379	21118	0.148221	0.152148	query_1	['GO:0007165']
414	GO:BP	GO:0043067	regulation of programmed cell death	0.0013034	TRUE	"Any process that modulates the frequency, rate or extent of programmed cell death, cell death resulting from activation of endogenous cellular processes." [GOC:jl]	1587	2557	256	21118	0.100117	0.161311	query_1	['GO:0010941', 'GO:0012501']
415	GO:BP	GO:0006413	translational initiation	0.0013337	TRUE	"The process preceding formation of the peptide bond between the first two amino acids of a protein. This includes the formation of a complex of the ribosome, mRNA or circRNA, and an initiation complex that contains the first aminoacyl-tRNA." [ISBN:019879276X]	121	2557	35	21118	0.0136879	0.289256	query_1	['GO:0006412', 'GO:0044237']
416	GO:BP	GO:0009199	ribonucleoside triphosphate metabolic process	0.00135046	TRUE	"The chemical reactions and pathways involving a ribonucleoside triphosphate, a compound consisting of a nucleobase linked to a ribose sugar esterified with triphosphate on the sugar." [GOC:go_curators, ISBN:0198506732]	91	2557	29	21118	0.0113414	0.318681	query_1	['GO:0009141']
417	GO:BP	GO:0006793	phosphorus metabolic process	0.00142418	TRUE	"The chemical reactions and pathways involving the nonmetallic element phosphorus or compounds that contain phosphorus, usually in the form of a phosphate group (PO4)." [GOC:ai]	2832	2557	424	21118	0.165819	0.149718	query_1	['GO:0044237']
418	GO:BP	GO:0010629	negative regulation of gene expression	0.00146279	TRUE	"Any process that decreases the frequency, rate or extent of gene expression. Gene expression is the process in which a gene's coding sequence is converted into a mature gene product or products (proteins or RNA). This includes the production of an RNA transcript as well as any processing to produce a mature RNA product or an mRNA or circRNA (for protein-coding genes) and the translation of that …	1105	2557	188	21118	0.0735237	0.170136	query_1	['GO:0010467', 'GO:0010468', 'GO:0010605']
419	GO:BP	GO:0033119	negative regulation of RNA splicing	0.00150832	TRUE	"Any process that stops, prevents, or reduces the frequency, rate or extent of RNA splicing." [GOC:mah]	27	2557	14	21118	0.00547517	0.518519	query_1	['GO:0008380', 'GO:0010629', 'GO:0043484', 'GO:0051253']
420	GO:BP	GO:0032956	regulation of actin cytoskeleton organization	0.00151053	TRUE	"Any process that modulates the frequency, rate or extent of the formation, arrangement of constituent parts, or disassembly of cytoskeletal structures comprising actin filaments and their associated proteins." [GOC:mah]	364	2557	77	21118	0.0301134	0.211538	query_1	['GO:0030036', 'GO:0032970', 'GO:0051493']
421	GO:BP	GO:0043085	positive regulation of catalytic activity	0.00154507	TRUE	"Any process that activates or increases the activity of an enzyme." [GOC:ebc, GOC:jl, GOC:tb, GOC:vw]	1268	2557	211	21118	0.0825186	0.166404	query_1	['GO:0044093', 'GO:0050790']
422	GO:BP	GO:0009206	purine ribonucleoside triphosphate biosynthetic process	0.00157602	TRUE	"The chemical reactions and pathways resulting in the formation of purine ribonucleoside triphosphate, a compound consisting of a purine base linked to a ribose sugar esterified with triphosphate on the sugar." [GOC:go_curators, ISBN:0198506732]	68	2557	24	21118	0.009386	0.352941	query_1	['GO:0009145', 'GO:0009201', 'GO:0009205']
423	GO:BP	GO:0009144	purine nucleoside triphosphate metabolic process	0.00174565	TRUE	"The chemical reactions and pathways involving purine nucleoside triphosphate, a compound consisting of a purine base linked to a ribose or deoxyribose sugar esterified with triphosphate on the sugar." [GOC:go_curators, ISBN:0198506732]	92	2557	29	21118	0.0113414	0.315217	query_1	['GO:0009141']
424	GO:BP	GO:0072655	establishment of protein localization to mitochondrion	0.00178252	TRUE	"The directed movement of a protein to the mitochondrion or a part of the mitochondrion." [GOC:mah]	97	2557	30	21118	0.0117325	0.309278	query_1	['GO:0070585', 'GO:0072594']
425	GO:BP	GO:0070585	protein localization to mitochondrion	0.00179467	TRUE	"A process in which a protein is transported to, or maintained in, a location within the mitochondrion." [GOC:ecd]	102	2557	31	21118	0.0121236	0.303922	query_1	['GO:0033365']
426	GO:BP	GO:0042127	regulation of cell population proliferation	0.00180172	TRUE	"Any process that modulates the frequency, rate or extent of cell proliferation." [GOC:jl]	1753	2557	278	21118	0.108721	0.158585	query_1	['GO:0008283', 'GO:0050794']
427	GO:BP	GO:0031400	negative regulation of protein modification process	0.00193964	TRUE	"Any process that stops, prevents, or reduces the frequency, rate or extent of the covalent alteration of one or more amino acid residues within a protein." [GOC:mah, GOC:tb]	571	2557	109	21118	0.0426281	0.190893	query_1	['GO:0006464', 'GO:0031399', 'GO:0032269']
428	GO:BP	GO:0032543	mitochondrial translation	0.00195139	TRUE	"The chemical reactions and pathways resulting in the formation of a protein in a mitochondrion. This is a ribosome-mediated process in which the information in messenger RNA (mRNA) is used to specify the sequence of amino acids in the protein; the mitochondrion has its own ribosomes and transfer RNAs, and uses a genetic code that differs from the nuclear code." [GOC:go_curators]	78	2557	26	21118	0.0101682	0.333333	query_1	['GO:0006412', 'GO:0140053']
429	GO:BP	GO:0043009	chordate embryonic development	0.00202151	TRUE	"The process whose specific outcome is the progression of the embryo over time, from zygote formation through a stage including a notochord and neural tube until birth or egg hatching." [GOC:mtg_sensu]	765	2557	138	21118	0.0539695	0.180392	query_1	['GO:0009792']
430	GO:BP	GO:0043487	regulation of RNA stability	0.00207017	TRUE	"Any process that modulates the propensity of RNA molecules to degradation. Includes processes that both stabilize and destabilize RNAs." [GOC:jl]	155	2557	41	21118	0.0160344	0.264516	query_1	['GO:0006401', 'GO:0010608', 'GO:0031329', 'GO:0051252', 'GO:0065008']
431	GO:BP	GO:1903320	regulation of protein modification by small protein conjugation or removal	0.00211511	TRUE	"Any process that modulates the frequency, rate or extent of protein modification by small protein conjugation or removal." [GO_REF:0000058, GOC:TermGenie, GOC:vw]	240	2557	56	21118	0.0219007	0.233333	query_1	['GO:0031399', 'GO:0070647']
432	GO:BP	GO:0070202	regulation of establishment of protein localization to chromosome	0.00215297	TRUE	"Any process that modulates the frequency, rate or extent of the directed movement of a protein to a specific location on a chromosome." [GOC:BHF, GOC:mah]	12	2557	9	21118	0.00351975	0.75	query_1	['GO:0070199', 'GO:0070201', 'GO:1903827']
433	GO:BP	GO:0000727	double-strand break repair via break-induced replication	0.00215297	TRUE	"The error-free repair of a double-strand break in DNA in which the centromere-proximal end of a broken chromosome searches for a homologous region in an intact chromosome. DNA synthesis initiates from the 3' end of the invading DNA strand, using the intact chromosome as the template, and progresses to the end of the chromosome." [GOC:elh, PMID:10357855]	12	2557	9	21118	0.00351975	0.75	query_1	['GO:0000724']
434	GO:BP	GO:0044380	protein localization to cytoskeleton	0.00216873	TRUE	"A process in which a protein is transported to, or maintained in, a location within the cytoskeleton." [GOC:jl]	60	2557	22	21118	0.00860383	0.366667	query_1	['GO:0033365']
435	GO:BP	GO:0009201	ribonucleoside triphosphate biosynthetic process	0.0023812	TRUE	"The chemical reactions and pathways resulting in the formation of a ribonucleoside triphosphate, a compound consisting of a nucleobase linked to a ribose sugar esterified with triphosphate on the sugar." [GOC:go_curators, ISBN:0198506732]	74	2557	25	21118	0.00977708	0.337838	query_1	['GO:0009142', 'GO:0009199']
436	GO:BP	GO:0061982	meiosis I cell cycle process	0.00239733	TRUE	"A process that contributes to the first meiotic division. The first meiotic division is the reductive division resulting in the separation of homologous chromosome pairs." [PMID:29385397]	129	2557	36	21118	0.014079	0.27907	query_1	['GO:1903046']
437	GO:BP	GO:0009792	embryo development ending in birth or egg hatching	0.00241992	TRUE	"The process whose specific outcome is the progression of an embryo over time, from zygote formation until the end of the embryonic life stage. The end of the embryonic life stage is organism-specific and may be somewhat arbitrary; for mammals it is usually considered to be birth, for insects the hatching of the first instar larva from the eggshell." [GOC:go_curators, GOC:isa_complete, GOC:mtg_se…	781	2557	140	21118	0.0547517	0.179257	query_1	['GO:0009790']
438	GO:BP	GO:0006753	nucleoside phosphate metabolic process	0.00243551	TRUE	"The chemical reactions and pathways involving any phosphorylated nucleoside." [GOC:mah]	476	2557	94	21118	0.0367618	0.197479	query_1	['GO:0006796', 'GO:0019637', 'GO:0055086']
439	GO:BP	GO:0007127	meiosis I	0.00252182	TRUE	"The first meiotic nuclear division in which homologous chromosomes are paired and segregated from each other, producing two haploid daughter nuclei." [GOC:dph, GOC:jl, GOC:mtg_cell_cycle, PMID:9334324]	124	2557	35	21118	0.0136879	0.282258	query_1	['GO:0061982', 'GO:0140013']
440	GO:BP	GO:0061061	muscle structure development	0.00261592	TRUE	"The progression of a muscle structure over time, from its formation to its mature state. Muscle structures are contractile cells, tissues or organs that are found in multicellular organisms." [GOC:dph]	654	2557	121	21118	0.0473211	0.185015	query_1	['GO:0048856']
441	GO:BP	GO:0009790	embryo development	0.00264244	TRUE	"The process whose specific outcome is the progression of an embryo from its formation until the end of its embryonic life stage. The end of the embryonic stage is organism-specific. For example, for mammals, the process would begin with zygote formation and end with birth. For insects, the process would begin at zygote formation and end with larval hatching. For plant zygotic embryos, this would…	1171	2557	196	21118	0.0766523	0.167378	query_1	['GO:0007275']
442	GO:BP	GO:0051603	proteolysis involved in cellular protein catabolic process	0.00269414	TRUE	"The hydrolysis of a peptide bond or bonds within a protein as part of the chemical reactions and pathways resulting in the breakdown of a protein by individual cells." [GOC:ai, GOC:dph, GOC:tb]	735	2557	133	21118	0.0520141	0.180952	query_1	['GO:0006508', 'GO:0044257']
443	GO:BP	GO:0060546	negative regulation of necroptotic process	0.00280399	TRUE	"Any process that decreases the rate, frequency or extent of a necroptotic process, a necrotic cell death process that results from the activation of endogenous cellular processes, such as signaling involving death domain receptors or Toll-like receptors." [GOC:BHF, GOC:dph, GOC:mtg_apoptosis, GOC:tb]	15	2557	10	21118	0.00391083	0.666667	query_1	['GO:0060544', 'GO:0062099', 'GO:0070266']
444	GO:BP	GO:0045292	mRNA cis splicing, via spliceosome	0.00282533	TRUE	"The joining together, after removal of an intervening sequence composed of one or more introns, of two segments of the same RNA molecule via spliceosomal catalysis to produce an mRNA composed only of exon sequences that all came from the same primary transcript." [GOC:krc, ISBN:0879695897, PMID:18458335]	18	2557	11	21118	0.00430192	0.611111	query_1	['GO:0000398']
445	GO:BP	GO:0044257	cellular protein catabolic process	0.00283957	TRUE	"The chemical reactions and pathways resulting in the breakdown of a protein by individual cells." [GOC:jl]	790	2557	141	21118	0.0551427	0.178481	query_1	['GO:0030163', 'GO:0044265', 'GO:0044267']
446	GO:BP	GO:0032269	negative regulation of cellular protein metabolic process	0.00308855	TRUE	"Any process that stops, prevents, or reduces the frequency, rate or extent of the chemical reactions and pathways involving a protein, occurring at the level of an individual cell." [GOC:mah]	1068	2557	181	21118	0.0707861	0.169476	query_1	['GO:0031324', 'GO:0032268', 'GO:0044267', 'GO:0051248']
447	GO:BP	GO:0097193	intrinsic apoptotic signaling pathway	0.00330346	TRUE	"A series of molecular signals in which an intracellular signal is conveyed to trigger the apoptotic death of a cell. The pathway starts with reception of an intracellular signal (e.g. DNA damage, endoplasmic reticulum stress, oxidative stress etc.), and ends when the execution phase of apoptosis is triggered. The intrinsic apoptotic signaling pathway is crucially regulated by permeabilization of…	291	2557	64	21118	0.0250293	0.219931	query_1	['GO:0035556', 'GO:0097190']
448	GO:BP	GO:0031297	replication fork processing	0.00341068	TRUE	"The process in which a DNA replication fork that has stalled is restored to a functional state and replication is restarted. The stalling may be due to DNA damage, DNA secondary structure, bound proteins, dNTP shortage, or other causes." [GOC:vw, PMID:11459955, PMID:15367656, PMID:17660542]	36	2557	16	21118	0.00625733	0.444444	query_1	['GO:0045005']
449	GO:BP	GO:0097190	apoptotic signaling pathway	0.00347793	TRUE	"A series of molecular signals which triggers the apoptotic death of a cell. The pathway starts with reception of a signal, and ends when the execution phase of apoptosis is triggered." [GOC:mtg_apoptosis]	591	2557	111	21118	0.0434102	0.187817	query_1	['GO:0006915', 'GO:0007165']
450	GO:BP	GO:0006754	ATP biosynthetic process	0.00349697	TRUE	"The chemical reactions and pathways resulting in the formation of ATP, adenosine 5'-triphosphate, a universally important coenzyme and enzyme regulator." [GOC:go_curators, ISBN:0198506732]	57	2557	21	21118	0.00821275	0.368421	query_1	['GO:0009152', 'GO:0009206', 'GO:0046034']
451	GO:BP	GO:0048589	developmental growth	0.00363293	TRUE	"The increase in size or mass of an entire organism, a part of an organism or a cell, where the increase in size or mass has the specific outcome of the progression of the organism over time from one condition to another." [GOC:go_curators]	739	2557	133	21118	0.0520141	0.179973	query_1	['GO:0032502', 'GO:0040007']
452	GO:BP	GO:0000338	protein deneddylation	0.00410249	TRUE	"The removal of a ubiquitin-like protein of the NEDD8 type from a protein." [GOC:krc]	10	2557	8	21118	0.00312867	0.8	query_1	['GO:0070646']
453	GO:BP	GO:1904851	positive regulation of establishment of protein localization to telomere	0.00410249	TRUE	"Any process that activates or increases the frequency, rate or extent of establishment of protein localization to telomere." [GO_REF:0000058, GOC:BHF, GOC:BHF_telomere, GOC:nc, GOC:TermGenie, PMID:25467444]	10	2557	8	21118	0.00312867	0.8	query_1	['GO:0070200', 'GO:0070203', 'GO:1904816', 'GO:1904951']
454	GO:BP	GO:0032204	regulation of telomere maintenance	0.0041757	TRUE	"Any process that modulates the frequency, rate or extent of a process that affects and monitors the activity of telomeric proteins and the length of telomeric DNA." [GOC:mah]	76	2557	25	21118	0.00977708	0.328947	query_1	['GO:0000723', 'GO:0033044', 'GO:0051052', 'GO:0065008']
455	GO:BP	GO:0006626	protein targeting to mitochondrion	0.0041757	TRUE	"The process of directing proteins towards and into the mitochondrion, usually mediated by mitochondrial proteins that recognize signals contained within the imported protein." [GOC:mcc, ISBN:0716731363]	76	2557	25	21118	0.00977708	0.328947	query_1	['GO:0006605', 'GO:0006839', 'GO:0007005', 'GO:0072655']
456	GO:BP	GO:0043488	regulation of mRNA stability	0.00455484	TRUE	"Any process that modulates the propensity of mRNA molecules to degradation. Includes processes that both stabilize and destabilize mRNAs." [GOC:jl]	143	2557	38	21118	0.0148612	0.265734	query_1	['GO:0043487', 'GO:0061013']
457	GO:BP	GO:0060547	negative regulation of necrotic cell death	0.0048416	TRUE	"Any process that decreases the rate, frequency or extent of necrotic cell death. Necrotic cell death is a cell death process that is morphologically characterized by a gain in cell volume (oncosis), swelling of organelles, plasma membrane rupture and subsequent loss of intracellular contents." [GOC:BHF, GOC:dph, GOC:tb]	22	2557	12	21118	0.004693	0.545455	query_1	['GO:0010939', 'GO:0060548', 'GO:0070265']
458	GO:BP	GO:0006164	purine nucleotide biosynthetic process	0.00522897	TRUE	"The chemical reactions and pathways resulting in the formation of a purine nucleotide, a compound consisting of nucleoside (a purine base linked to a deoxyribose or ribose sugar) esterified with a phosphate group at either the 3' or 5'-hydroxyl group of the sugar." [GOC:go_curators, ISBN:0198506732]	177	2557	44	21118	0.0172077	0.248588	query_1	['GO:0006163', 'GO:0009165', 'GO:0072522']
459	GO:BP	GO:0042692	muscle cell differentiation	0.00524168	TRUE	"The process in which a relatively unspecialized cell acquires specialized features of a muscle cell." [CL:0000187, GOC:go_curators]	388	2557	79	21118	0.0308956	0.203608	query_1	['GO:0030154', 'GO:0061061']
460	GO:BP	GO:1905508	protein localization to microtubule organizing center	0.00533451	TRUE	"A process in which a protein is transported to, or maintained in, a location within a microtubule organizing center." [GO_REF:0000087, GOC:TermGenie, PMID:19001497]	37	2557	16	21118	0.00625733	0.432432	query_1	['GO:0072698']
461	GO:BP	GO:0030163	protein catabolic process	0.00535606	TRUE	"The chemical reactions and pathways resulting in the breakdown of a protein by the destruction of the native, active configuration, with or without the hydrolysis of peptide bonds." [GOC:mah]	944	2557	162	21118	0.0633555	0.17161	query_1	['GO:0009057', 'GO:0019538', 'GO:1901565']
462	GO:BP	GO:0031344	regulation of cell projection organization	0.00539336	TRUE	"Any process that modulates the frequency, rate or extent of a process involved in the formation, arrangement of constituent parts, or disassembly of cell projections." [GOC:mah]	724	2557	130	21118	0.0508408	0.179558	query_1	['GO:0030030', 'GO:0051128']
463	GO:BP	GO:0032271	regulation of protein polymerization	0.00541699	TRUE	"Any process that modulates the frequency, rate or extent of the process of creating protein polymers." [GOC:mah]	235	2557	54	21118	0.0211185	0.229787	query_1	['GO:0043254', 'GO:0051258']
464	GO:BP	GO:0000956	nuclear-transcribed mRNA catabolic process	0.00560809	TRUE	"The chemical reactions and pathways resulting in the breakdown of nuclear-transcribed mRNAs in eukaryotic cells." [GOC:krc]	107	2557	31	21118	0.0121236	0.28972	query_1	['GO:0006402']
465	GO:BP	GO:0045893	positive regulation of transcription, DNA-templated	0.0056246	TRUE	"Any process that activates or increases the frequency, rate or extent of cellular DNA-templated transcription." [GOC:go_curators, GOC:txnOH]	1616	2557	256	21118	0.100117	0.158416	query_1	['GO:0006351', 'GO:0006355', 'GO:1903508']
466	GO:BP	GO:1903508	positive regulation of nucleic acid-templated transcription	0.0056246	TRUE	"Any process that activates or increases the frequency, rate or extent of nucleic acid-templated transcription." [GO_REF:0000058, GOC:pr, GOC:TermGenie, GOC:txnOH, GOC:vw]	1616	2557	256	21118	0.100117	0.158416	query_1	['GO:0097659', 'GO:1902680', 'GO:1903506']
467	GO:BP	GO:0009117	nucleotide metabolic process	0.00589096	TRUE	"The chemical reactions and pathways involving a nucleotide, a nucleoside that is esterified with (ortho)phosphate or an oligophosphate at any hydroxyl group on the glycose moiety; may be mono-, di- or triphosphate; this definition includes cyclic nucleotides (nucleoside cyclic phosphates)." [GOC:ma]	466	2557	91	21118	0.0355886	0.195279	query_1	['GO:0006753']
468	GO:BP	GO:1902680	positive regulation of RNA biosynthetic process	0.00590467	TRUE	"Any process that activates or increases the frequency, rate or extent of RNA biosynthetic process." [GO:jl, GO_REF:0000058, GOC:TermGenie]	1617	2557	256	21118	0.100117	0.158318	query_1	['GO:0010557', 'GO:0031328', 'GO:0032774', 'GO:0051254', 'GO:2001141']
469	GO:BP	GO:0051299	centrosome separation	0.00623978	TRUE	"The process in which duplicated centrosome components move away from each other. The centriole pair within each centrosome becomes part of a separate microtubule organizing center that nucleates a radial array of microtubules called an aster. The two asters move to opposite sides of the nucleus to form the two poles of the mitotic spindle." [GOC:ai]	13	2557	9	21118	0.00351975	0.692308	query_1	['GO:0007098', 'GO:0022402']
470	GO:BP	GO:0009263	deoxyribonucleotide biosynthetic process	0.00623978	TRUE	"The chemical reactions and pathways resulting in the formation of a deoxyribonucleotide, a compound consisting of deoxyribonucleoside (a base linked to a deoxyribose sugar) esterified with a phosphate group at either the 3' or 5'-hydroxyl group of the sugar." [GOC:go_curators, ISBN:0198506732]	13	2557	9	21118	0.00351975	0.692308	query_1	['GO:0009165', 'GO:0009262', 'GO:1901137']
471	GO:BP	GO:0120035	regulation of plasma membrane bounded cell projection organization	0.00641388	TRUE	"Any process that modulates the frequency, rate or extent of a process involved in the formation, arrangement of constituent parts, or disassembly of plasma membrane bounded cell projections." [GOC:krc]	706	2557	127	21118	0.0496676	0.179887	query_1	['GO:0031344', 'GO:0120036']
472	GO:BP	GO:0009314	response to radiation	0.0064275	TRUE	"Any process that results in a change in state or activity of a cell or an organism (in terms of movement, secretion, enzyme production, gene expression, etc.) as a result of an electromagnetic radiation stimulus. Electromagnetic radiation is a propagating wave in space with electric and magnetic components. These components oscillate at right angles to each other and to the direction of propagat…	454	2557	89	21118	0.0348064	0.196035	query_1	['GO:0009628']
473	GO:BP	GO:0023051	regulation of signaling	0.00651057	TRUE	"Any process that modulates the frequency, rate or extent of a signaling process." [GOC:mtg_signal]	3276	2557	477	21118	0.186547	0.145604	query_1	['GO:0023052', 'GO:0050789']
474	GO:BP	GO:0043968	histone H2A acetylation	0.00666126	TRUE	"The modification of histone H2A by the addition of an acetyl group." [GOC:jl]	16	2557	10	21118	0.00391083	0.625	query_1	['GO:0016573']
475	GO:BP	GO:0001732	formation of cytoplasmic translation initiation complex	0.00666126	TRUE	"Joining of the large subunit, with release of IF2/eIF2 and IF3/eIF3. This leaves the functional ribosome at the AUG, with the methionyl/formyl-methionyl-tRNA positioned at the P site." [GOC:hjd]	16	2557	10	21118	0.00391083	0.625	query_1	['GO:0002183', 'GO:0022618']
476	GO:BP	GO:0070200	establishment of protein localization to telomere	0.00666126	TRUE	"The directed movement of a protein to a specific location in the telomeric region of a chromosome." [GOC:BHF, GOC:mah]	16	2557	10	21118	0.00391083	0.625	query_1	['GO:0070198', 'GO:0070199']
477	GO:BP	GO:0034728	nucleosome organization	0.00712363	TRUE	"A process that is carried out at the cellular level which results in the assembly, arrangement of constituent parts, or disassembly of one or more nucleosomes." [GOC:mah]	140	2557	37	21118	0.0144701	0.264286	query_1	['GO:0006325', 'GO:0071824']
478	GO:BP	GO:0045739	positive regulation of DNA repair	0.00713995	TRUE	"Any process that activates or increases the frequency, rate or extent of DNA repair." [GOC:go_curators]	78	2557	25	21118	0.00977708	0.320513	query_1	['GO:0006281', 'GO:0006282', 'GO:0051054', 'GO:2001022']
479	GO:BP	GO:2000779	regulation of double-strand break repair	0.00737164	TRUE	"Any process that modulates the frequency, rate or extent of double-strand break repair." [GOC:BHF]	83	2557	26	21118	0.0101682	0.313253	query_1	['GO:0006282', 'GO:0006302']
480	GO:BP	GO:1902751	positive regulation of cell cycle G2/M phase transition	0.00766866	TRUE	"Any signalling pathway that activates or increases the activity of a cell cycle cyclin-dependent protein kinase to modulate the switch from G2 phase to M phase of the cell cycle." [GO_REF:0000058, GOC:jl, GOC:TermGenie]	30	2557	14	21118	0.00547517	0.466667	query_1	['GO:0044839', 'GO:1901989', 'GO:1902749']
481	GO:BP	GO:0072331	signal transduction by p53 class mediator	0.00770543	TRUE	"An intracellular signaling process that is induced by the cell cycle regulator phosphoprotein p53 or an equivalent protein." [GOC:mah]	135	2557	36	21118	0.014079	0.266667	query_1	['GO:0035556']
482	GO:BP	GO:0045727	positive regulation of translation	0.00770543	TRUE	"Any process that activates or increases the frequency, rate or extent of the chemical reactions and pathways resulting in the formation of proteins by the translation of mRNA or circRNA." [GOC:dph, GOC:go_curators, GOC:tb]	135	2557	36	21118	0.014079	0.266667	query_1	['GO:0006412', 'GO:0006417', 'GO:0010557', 'GO:0010628', 'GO:0031328', 'GO:0032270', 'GO:0034250']
483	GO:BP	GO:0009152	purine ribonucleotide biosynthetic process	0.00778179	TRUE	"The chemical reactions and pathways resulting in the formation of a purine ribonucleotide, a compound consisting of ribonucleoside (a purine base linked to a ribose sugar) esterified with a phosphate group at either the 3' or 5'-hydroxyl group of the sugar." [GOC:go_curators, ISBN:0198506732]	157	2557	40	21118	0.0156433	0.254777	query_1	['GO:0006164', 'GO:0009150', 'GO:0009260']
484	GO:BP	GO:0010032	meiotic chromosome condensation	0.0078373	TRUE	"Compaction of chromatin structure prior to meiosis in eukaryotic cells." [PMID:10072401]	6	2557	6	21118	0.0023465	1	query_1	['GO:0030261', 'GO:0070192']
485	GO:BP	GO:0018208	peptidyl-proline modification	0.00785668	TRUE	"The modification of peptidyl-proline." [GOC:go_curators]	55	2557	20	21118	0.00782167	0.363636	query_1	['GO:0018193']
486	GO:BP	GO:0032467	positive regulation of cytokinesis	0.0081822	TRUE	"Any process that activates or increases the frequency, rate or extent of the division of the cytoplasm of a cell, and its separation into two daughter cells." [GOC:mah]	34	2557	15	21118	0.00586625	0.441176	query_1	['GO:0000910', 'GO:0032465', 'GO:0051781', 'GO:0090068']
487	GO:BP	GO:0006367	transcription initiation from RNA polymerase II promoter	0.00832896	TRUE	"Any process involved in the assembly of the RNA polymerase II preinitiation complex (PIC) at an RNA polymerase II promoter region of a DNA template, resulting in the subsequent synthesis of RNA from that promoter. The initiation phase includes PIC assembly and the formation of the first few bonds in the RNA chain, including abortive initiation, which occurs when the first few nucleotides are rep…	69	2557	23	21118	0.00899492	0.333333	query_1	['GO:0006352', 'GO:0006366']
488	GO:BP	GO:0009260	ribonucleotide biosynthetic process	0.00888913	TRUE	"The chemical reactions and pathways resulting in the formation of a ribonucleotide, a compound consisting of ribonucleoside (a base linked to a ribose sugar) esterified with a phosphate group at either the 3' or 5'-hydroxyl group of the sugar." [GOC:go_curators, ISBN:0198506732]	169	2557	42	21118	0.0164255	0.248521	query_1	['GO:0009165', 'GO:0009259', 'GO:0046390']
489	GO:BP	GO:0046390	ribose phosphate biosynthetic process	0.00938859	TRUE	"The chemical reactions and pathways resulting in the formation of ribose phosphate, any phosphorylated ribose sugar." [GOC:ai]	175	2557	43	21118	0.0168166	0.245714	query_1	['GO:0019693', 'GO:0090407', 'GO:1901137']
490	GO:BP	GO:0044843	cell cycle G1/S phase transition	0.0094712	TRUE	"The cell cycle process by which a cell in G1 phase commits to S phase." [GOC:mtg_cell_cycle]	198	2557	47	21118	0.0183809	0.237374	query_1	['GO:0044770']
491	GO:BP	GO:0010646	regulation of cell communication	0.00983454	TRUE	"Any process that modulates the frequency, rate or extent of cell communication. Cell communication is the process that mediates interactions between a cell and its surroundings. Encompasses interactions such as signaling or attachment between one cell and another cell, between a cell and an extracellular matrix, or between a cell and any other aspect of its environment." [GOC:dph, GOC:tb]	3265	2557	474	21118	0.185373	0.145176	query_1	['GO:0007154', 'GO:0050794']
492	GO:BP	GO:0019080	viral gene expression	0.0101746	TRUE	"A process by which a viral gene is converted into a mature gene product or products (proteins or RNA). This includes viral transcription, processing to produce a mature RNA product, and viral translation." [GOC:bf, GOC:jl, ISBN:0121585336]	65	2557	22	21118	0.00860383	0.338462	query_1	['GO:0016032']
493	GO:BP	GO:1903829	positive regulation of cellular protein localization	0.0103194	TRUE	"Any process that activates or increases the frequency, rate or extent of cellular protein localization. Cellular protein localization is any process in which a protein is transported to, and/or maintained in, a specific location and encompasses movement within the cell, from within the cell to the cell surface, or from one location to another at the surface of a cell." [GO_REF:0000058, GOC:TermG…	276	2557	60	21118	0.023465	0.217391	query_1	['GO:0034613', 'GO:0048522', 'GO:1903827']
494	GO:BP	GO:0051495	positive regulation of cytoskeleton organization	0.0104454	TRUE	"Any process that activates or increases the frequency, rate or extent of the formation, arrangement of constituent parts, or disassembly of cytoskeletal structures." [GOC:ai]	228	2557	52	21118	0.0203363	0.22807	query_1	['GO:0007010', 'GO:0010638', 'GO:0051493']
495	GO:BP	GO:0042176	regulation of protein catabolic process	0.0106436	TRUE	"Any process that modulates the frequency, rate or extent of the chemical reactions and pathways resulting in the breakdown of a protein by the destruction of the native, active configuration, with or without the hydrolysis of peptide bonds." [GOC:go_curators, GOC:jl]	395	2557	79	21118	0.0308956	0.2	query_1	['GO:0009894', 'GO:0030163', 'GO:0051246']
496	GO:BP	GO:1904356	regulation of telomere maintenance via telomere lengthening	0.0108372	TRUE	"Any process that modulates the frequency, rate or extent of telomere maintenance via telomere lengthening." [GO_REF:0000058, GOC:BHF, GOC:BHF_telomere, GOC:nc, GOC:TermGenie, PMID:23959892]	56	2557	20	21118	0.00782167	0.357143	query_1	['GO:0010833', 'GO:0032204']
497	GO:BP	GO:0043967	histone H4 acetylation	0.0109927	TRUE	"The modification of histone H4 by the addition of an acetyl group." [GOC:jl]	70	2557	23	21118	0.00899492	0.328571	query_1	['GO:0016573']
498	GO:BP	GO:0090151	establishment of protein localization to mitochondrial membrane	0.0112212	TRUE	"The directed movement of a protein to a specific location in the mitochondrial membrane." [GOC:ascb_2009, GOC:dph, GOC:tb]	27	2557	13	21118	0.00508408	0.481481	query_1	['GO:0007006', 'GO:0051649', 'GO:0072655', 'GO:0090150']
499	GO:BP	GO:0000470	maturation of LSU-rRNA	0.0112212	TRUE	"Any process involved in the maturation of a precursor Large SubUnit (LSU) ribosomal RNA (rRNA) molecule into a mature LSU-rRNA molecule." [GOC:curators]	27	2557	13	21118	0.00508408	0.481481	query_1	['GO:0006364', 'GO:0042273']
500	GO:BP	GO:1902275	regulation of chromatin organization	0.0112468	TRUE	"Any process that modulates the frequency, rate or extent of chromatin organization." [GO_REF:0000058, GOC:bf, GOC:TermGenie, GOC:vw, PMID:18314879]	205	2557	48	21118	0.018772	0.234146	query_1	['GO:0006325', 'GO:0051128']
501	GO:BP	GO:0070192	chromosome organization involved in meiotic cell cycle	0.0115718	TRUE	"A process of chromosome organization that is involved in a meiotic cell cycle." [GOC:mah]	75	2557	24	21118	0.009386	0.32	query_1	['GO:0051276', 'GO:1903046']
502	GO:BP	GO:0060548	negative regulation of cell death	0.0118393	TRUE	"Any process that decreases the rate or frequency of cell death. Cell death is the specific activation or halting of processes within a cell so that its vital functions markedly cease, rather than simply deteriorating gradually over time, which culminates in cell death." [GOC:BHF, GOC:dph, GOC:tb]	1119	2557	185	21118	0.0723504	0.165326	query_1	['GO:0008219', 'GO:0010941', 'GO:0048523']
503	GO:BP	GO:1905269	positive regulation of chromatin organization	0.0123104	TRUE	"Any process that activates or increases the frequency, rate or extent of chromatin organization." [GO_REF:0000058, GOC:pr, GOC:TermGenie, GOC:vw, PMID:654321]	116	2557	32	21118	0.0125147	0.275862	query_1	['GO:0006325', 'GO:1902275', 'GO:2001252']
504	GO:BP	GO:0030182	neuron differentiation	0.0123201	TRUE	"The process in which a relatively unspecialized cell acquires specialized features of a neuron." [GOC:mah]	1472	2557	234	21118	0.0915135	0.158967	query_1	['GO:0030154', 'GO:0048699']
505	GO:BP	GO:0071539	protein localization to centrosome	0.0127179	TRUE	"A process in which a protein is transported to, or maintained at, the centrosome." [GOC:ecd]	35	2557	15	21118	0.00586625	0.428571	query_1	['GO:1905508']
506	GO:BP	GO:0002183	cytoplasmic translational initiation	0.0127179	TRUE	"The process preceding formation of the peptide bond between the first two amino acids of a protein in the cytoplasm. This includes the formation of a complex of the ribosome, mRNA or circRNA, and an initiation complex that contains the first aminoacyl-tRNA." [GOC:hjd]	35	2557	15	21118	0.00586625	0.428571	query_1	['GO:0002181', 'GO:0006413']
507	GO:BP	GO:0001558	regulation of cell growth	0.0138929	TRUE	"Any process that modulates the frequency, rate, extent or direction of cell growth." [GOC:go_curators]	417	2557	82	21118	0.0320688	0.196643	query_1	['GO:0016049', 'GO:0040008', 'GO:0051128']
508	GO:BP	GO:0031647	regulation of protein stability	0.0142818	TRUE	"Any process that affects the structure and integrity of a protein, altering the likelihood of its degradation or aggregation." [GOC:dph, GOC:mah, GOC:tb]	291	2557	62	21118	0.0242472	0.213058	query_1	['GO:0065008']
509	GO:BP	GO:0042776	mitochondrial ATP synthesis coupled proton transport	0.0144137	TRUE	"The transport of protons across a mitochondrial membrane to generate an electrochemical gradient (proton-motive force) that powers ATP synthesis." [GOC:mtg_sensu, ISBN:0716731363]	17	2557	10	21118	0.00391083	0.588235	query_1	['GO:0006119', 'GO:0015986', 'GO:0046907', 'GO:1990542']
510	GO:BP	GO:0062099	negative regulation of programmed necrotic cell death	0.0144137	TRUE	"Any process that decreases the frequency, rate or extent of programmed necrotic cell death." [GOC:aruk, GOC:rph, PMID:27258785]	17	2557	10	21118	0.00391083	0.588235	query_1	['GO:0043069', 'GO:0060547', 'GO:0062098', 'GO:0097300']
511	GO:BP	GO:0031175	neuron projection development	0.0146707	TRUE	"The process whose specific outcome is the progression of a neuron projection over time, from its formation to the mature structure. A neuron projection is any process extending from a neural cell, such as axons or dendrites (collectively called neurites)." [GOC:mah]	1066	2557	177	21118	0.0692217	0.166041	query_1	['GO:0048666', 'GO:0120036']
512	GO:BP	GO:0031396	regulation of protein ubiquitination	0.0149242	TRUE	"Any process that modulates the frequency, rate or extent of the addition of ubiquitin groups to a protein." [GOC:mah]	207	2557	48	21118	0.018772	0.231884	query_1	['GO:0016567', 'GO:1903320']
513	GO:BP	GO:0010468	regulation of gene expression	0.0151599	TRUE	"Any process that modulates the frequency, rate or extent of gene expression. Gene expression is the process in which a gene's coding sequence is converted into a mature gene product or products (proteins or RNA). This includes the production of an RNA transcript as well as any processing to produce a mature RNA product or an mRNA or circRNA (for protein-coding genes) and the translation of that …	4888	2557	681	21118	0.266328	0.139321	query_1	['GO:0010467', 'GO:0060255']
514	GO:BP	GO:1902969	mitotic DNA replication	0.0155826	TRUE	"Any nuclear DNA replication that is involved in a mitotic cell cycle." [GO_REF:0000060, GOC:TermGenie]	14	2557	9	21118	0.00351975	0.642857	query_1	['GO:0033260', 'GO:1903047']
515	GO:BP	GO:0015986	ATP synthesis coupled proton transport	0.0160223	TRUE	"The transport of protons across a membrane to generate an electrochemical gradient (proton-motive force) that powers ATP synthesis." [ISBN:0716731363]	24	2557	12	21118	0.004693	0.5	query_1	['GO:0006754', 'GO:0015985']
516	GO:BP	GO:0015985	energy coupled proton transport, down electrochemical gradient	0.0160223	TRUE	"The transport of protons across a membrane to generate an electrochemical gradient (proton-motive force) that provides energy for the synthesis of ATP or GTP." [GOC:mah]	24	2557	12	21118	0.004693	0.5	query_1	['GO:1902600']
517	GO:BP	GO:0045740	positive regulation of DNA replication	0.0165612	TRUE	"Any process that activates or increases the frequency, rate or extent of DNA replication." [GOC:go_curators]	44	2557	17	21118	0.00664842	0.386364	query_1	['GO:0006260', 'GO:0006275', 'GO:0010557', 'GO:0031328']
518	GO:BP	GO:0090305	nucleic acid phosphodiester bond hydrolysis	0.0174864	TRUE	"The nucleic acid metabolic process in which the phosphodiester bonds between nucleotides are cleaved by hydrolysis." [GOC:dph, GOC:tb]	256	2557	56	21118	0.0219007	0.21875	query_1	['GO:0090304']
519	GO:BP	GO:0006406	mRNA export from nucleus	0.0175701	TRUE	"The directed movement of mRNA from the nucleus to the cytoplasm." [GOC:ma]	53	2557	19	21118	0.00743058	0.358491	query_1	['GO:0006405', 'GO:0010467', 'GO:0051028', 'GO:0071427']
520	GO:BP	GO:0071427	mRNA-containing ribonucleoprotein complex export from nucleus	0.0175701	TRUE	"The directed movement of a ribonucleoprotein complex that contains messenger RNA from the nucleus to the cytoplasm." [GOC:mah]	53	2557	19	21118	0.00743058	0.358491	query_1	['GO:0071426']
521	GO:BP	GO:2001233	regulation of apoptotic signaling pathway	0.0177262	TRUE	"Any process that modulates the frequency, rate or extent of apoptotic signaling pathway." [GOC:mtg_apoptosis]	381	2557	76	21118	0.0297223	0.199475	query_1	['GO:0009966', 'GO:0042981', 'GO:0097190']
522	GO:BP	GO:0006997	nucleus organization	0.0182152	TRUE	"A process that is carried out at the cellular level which results in the assembly, arrangement of constituent parts, or disassembly of the nucleus." [GOC:dph, GOC:ems, GOC:jl, GOC:mah]	118	2557	32	21118	0.0125147	0.271186	query_1	['GO:0006996']
523	GO:BP	GO:2001242	regulation of intrinsic apoptotic signaling pathway	0.0186775	TRUE	"Any process that modulates the frequency, rate or extent of intrinsic apoptotic signaling pathway." [GOC:mtg_apoptosis]	168	2557	41	21118	0.0160344	0.244048	query_1	['GO:0097193', 'GO:1902531', 'GO:2001233']
524	GO:BP	GO:1902905	positive regulation of supramolecular fiber organization	0.0196906	TRUE	"Any process that activates or increases the frequency, rate or extent of supramolecular fiber organization." [GO_REF:0000058, GOC:PARL, GOC:rl, GOC:TermGenie, PMID:23921388]	209	2557	48	21118	0.018772	0.229665	query_1	['GO:0051130', 'GO:0097435', 'GO:1902903']
525	GO:BP	GO:0032210	regulation of telomere maintenance via telomerase	0.0205568	TRUE	"Any process that modulates the frequency, rate or extent of the addition of telomeric repeats by telomerase." [GOC:mah]	49	2557	18	21118	0.0070395	0.367347	query_1	['GO:0007004', 'GO:1904356', 'GO:2000278']
526	GO:BP	GO:0104004	cellular response to environmental stimulus	0.0208626	TRUE	"Any process that results in a change in state or activity of a cell (in terms of movement, secretion, enzyme production, gene expression, etc.) as a result of an environmental stimulus." [GOC:dos]	313	2557	65	21118	0.0254204	0.207668	query_1	['GO:0051716']
527	GO:BP	GO:0071214	cellular response to abiotic stimulus	0.0208626	TRUE	"Any process that results in a change in state or activity of a cell (in terms of movement, secretion, enzyme production, gene expression, etc.) as a result of an abiotic (non-living) stimulus." [GOC:mah]	313	2557	65	21118	0.0254204	0.207668	query_1	['GO:0009628', 'GO:0104004']
528	GO:BP	GO:0110053	regulation of actin filament organization	0.0213558	TRUE	"Any process that modulates the frequency, rate or extent of actin filament organization." [GOC:kmv]	276	2557	59	21118	0.0230739	0.213768	query_1	['GO:0007015', 'GO:0032956', 'GO:1902903']
529	GO:BP	GO:0043069	negative regulation of programmed cell death	0.0216959	TRUE	"Any process that stops, prevents, or reduces the frequency, rate or extent of programmed cell death, cell death resulting from activation of endogenous cellular processes." [GOC:jl]	1002	2557	167	21118	0.0653109	0.166667	query_1	['GO:0012501', 'GO:0043067', 'GO:0060548']
530	GO:BP	GO:0031058	positive regulation of histone modification	0.0218155	TRUE	"Any process that activates or increases the frequency, rate or extent of the covalent alteration of a histone." [GOC:mah]	103	2557	29	21118	0.0113414	0.281553	query_1	['GO:0016570', 'GO:0031056', 'GO:0031401', 'GO:1905269']
531	GO:BP	GO:0061013	regulation of mRNA catabolic process	0.021862	TRUE	"Any process that modulates the rate, frequency, or extent of a mRNA catabolic process, the chemical reactions and pathways resulting in the breakdown of RNA, ribonucleic acid, one of the two main type of nucleic acid, consisting of a long, unbranched macromolecule formed from ribonucleotides joined in 3',5'-phosphodiester linkage." [GOC:ascb_2009, GOC:dph, GOC:tb]	152	2557	38	21118	0.0148612	0.25	query_1	['GO:0006402', 'GO:0010468', 'GO:0031329', 'GO:1903311']
532	GO:BP	GO:0007063	regulation of sister chromatid cohesion	0.0220907	TRUE	"Any process that modulates the frequency, rate or extent of sister chromatid cohesion." [GOC:go_curators]	21	2557	11	21118	0.00430192	0.52381	query_1	['GO:0007062', 'GO:0010564', 'GO:0033044']
533	GO:BP	GO:0051204	protein insertion into mitochondrial membrane	0.0220907	TRUE	"The process that results in the incorporation of a protein into a mitochondrial membrane." [GOC:ai]	21	2557	11	21118	0.00430192	0.52381	query_1	['GO:0006839', 'GO:0006886', 'GO:0051205', 'GO:0070585', 'GO:0090151']
534	GO:BP	GO:2001021	negative regulation of response to DNA damage stimulus	0.0242809	TRUE	"Any process that stops, prevents or reduces the frequency, rate or extent of response to DNA damage stimulus." [GOC:obol]	73	2557	23	21118	0.00899492	0.315068	query_1	['GO:0006974', 'GO:0048523', 'GO:0048585', 'GO:2001020']
535	GO:BP	GO:0007569	cell aging	0.0252589	TRUE	"An aging process that has as participant a cell after a cell has stopped dividing. Cell aging may occur when a cell has temporarily stopped dividing through cell cycle arrest (GO:0007050) or when a cell has permanently stopped dividing, in which case it is undergoing cellular senescence (GO:0090398). May precede cell death (GO:0008219) and succeed cell maturation (GO:0048469)." [GOC:PO_curators]	109	2557	30	21118	0.0117325	0.275229	query_1	['GO:0007568', 'GO:0048869']
536	GO:BP	GO:0000082	G1/S transition of mitotic cell cycle	0.0263743	TRUE	"The mitotic cell cycle transition by which a cell in G1 commits to S phase. The process begins with the build up of G1 cyclin-dependent kinase (G1 CDK), resulting in the activation of transcription of G1 cyclins. The process ends with the positive feedback of the G1 cyclins on the G1 CDK which commits the cell to S phase, in which DNA replication is initiated." [GOC:mtg_cell_cycle]	176	2557	42	21118	0.0164255	0.238636	query_1	['GO:0044772', 'GO:0044843']
537	GO:BP	GO:0043489	RNA stabilization	0.0268866	TRUE	"Prevention of degradation of RNA molecules." [GOC:go_curators]	59	2557	20	21118	0.00782167	0.338983	query_1	['GO:0043487', 'GO:1902369']
538	GO:BP	GO:0055086	nucleobase-containing small molecule metabolic process	0.0285777	TRUE	"The cellular chemical reactions and pathways involving a nucleobase-containing small molecule: a nucleobase, a nucleoside, or a nucleotide." [GOC:vw]	537	2557	99	21118	0.0387172	0.184358	query_1	['GO:0006139', 'GO:0044281']
539	GO:BP	GO:0031145	anaphase-promoting complex-dependent catabolic process	0.0288992	TRUE	"The chemical reactions and pathways resulting in the breakdown of a protein or peptide by hydrolysis of its peptide bonds, initiated by the covalent attachment of ubiquitin, with ubiquitin-protein ligation catalyzed by the anaphase-promoting complex, and mediated by the proteasome." [GOC:mah, PMID:15380083, PMID:15840442]	18	2557	10	21118	0.00391083	0.555556	query_1	['GO:0043161']
540	GO:BP	GO:0032506	cytokinetic process	0.0289327	TRUE	"A cellular process that is involved in cytokinesis (the division of the cytoplasm of a cell and its separation into two daughter cells)." [GOC:bf, GOC:isa_complete, GOC:mah]	37	2557	15	21118	0.00586625	0.405405	query_1	['GO:0000910', 'GO:0022402']
541	GO:BP	GO:1904951	positive regulation of establishment of protein localization	0.0300289	TRUE	"Any process that activates or increases the frequency, rate or extent of establishment of protein localization." [GO_REF:0000058, GOC:TermGenie, PMID:22761445]	329	2557	67	21118	0.0262026	0.203647	query_1	['GO:0045184', 'GO:0048518', 'GO:0070201']
542	GO:BP	GO:0042273	ribosomal large subunit biogenesis	0.0304472	TRUE	"A cellular process that results in the biosynthesis of constituent macromolecules, assembly, and arrangement of constituent parts of a large ribosomal subunit; includes transport to the sites of protein synthesis." [GOC:jl]	69	2557	22	21118	0.00860383	0.318841	query_1	['GO:0022613', 'GO:0042254']
543	GO:BP	GO:0048666	neuron development	0.0305462	TRUE	"The process whose specific outcome is the progression of a neuron over time, from initial commitment of the cell to a specific fate, to the fully functional differentiated cell." [GOC:dph]	1208	2557	195	21118	0.0762612	0.161424	query_1	['GO:0030182', 'GO:0048468']
544	GO:BP	GO:2000573	positive regulation of DNA biosynthetic process	0.0312259	TRUE	"Any process that activates or increases the frequency, rate or extent of DNA biosynthetic process." [GOC:obol]	74	2557	23	21118	0.00899492	0.310811	query_1	['GO:0010557', 'GO:0031328', 'GO:0051054', 'GO:0071897', 'GO:2000278']
545	GO:BP	GO:0043624	cellular protein complex disassembly	0.0315569	TRUE	"The disaggregation of a protein complex into its constituent components, occurring at the level of an individual cell. Protein complexes may have other associated non-protein prosthetic groups, such as nucleic acids, metal ions or carbohydrate groups." [GOC:jl]	143	2557	36	21118	0.014079	0.251748	query_1	['GO:0032984']
546	GO:BP	GO:0051094	positive regulation of developmental process	0.0325162	TRUE	"Any process that activates or increases the rate or extent of development, the biological process whose specific outcome is the progression of an organism over time from an initial condition (e.g. a zygote, or a young adult) to a later condition (e.g. a multicellular animal or an aged adult)." [GOC:ai]	1412	2557	223	21118	0.0872116	0.157932	query_1	['GO:0032502', 'GO:0048518', 'GO:0050793']
547	GO:BP	GO:0008284	positive regulation of cell population proliferation	0.033297	TRUE	"Any process that activates or increases the rate or extent of cell proliferation." [GOC:go_curators]	1045	2557	172	21118	0.0672663	0.164593	query_1	['GO:0008283', 'GO:0042127', 'GO:0048522']
548	GO:BP	GO:1904814	regulation of protein localization to chromosome, telomeric region	0.0347506	TRUE	"Any process that modulates the frequency, rate or extent of protein localization to chromosome, telomeric region." [GO_REF:0000058, GOC:BHF, GOC:BHF_telomere, GOC:nc, GOC:TermGenie, PMID:19487455]	15	2557	9	21118	0.00351975	0.6	query_1	['GO:0070198', 'GO:1903827']
549	GO:BP	GO:0071806	protein transmembrane transport	0.0357692	TRUE	"The process in which a protein is transported across a membrane." [GOC:mah, GOC:vw]	60	2557	20	21118	0.00782167	0.333333	query_1	['GO:0015031', 'GO:0055085']
550	GO:BP	GO:0007100	mitotic centrosome separation	0.0359922	TRUE	"Separation of duplicated centrosome components at the beginning of mitosis. The centriole pair within each centrosome becomes part of a separate microtubule organizing center that nucleates a radial array of microtubules called an aster. The two asters move to opposite sides of the nucleus to form the two poles of the mitotic spindle." [ISBN:0815316194]	12	2557	8	21118	0.00312867	0.666667	query_1	['GO:0051299', 'GO:0140014', 'GO:1903047']
551	GO:BP	GO:2000105	positive regulation of DNA-dependent DNA replication	0.0359922	TRUE	"Any process that activates or increases the frequency, rate or extent of DNA-dependent DNA replication." [GOC:mah]	12	2557	8	21118	0.00312867	0.666667	query_1	['GO:0006261', 'GO:0045740', 'GO:0090329']
552	GO:BP	GO:0090407	organophosphate biosynthetic process	0.0363554	TRUE	"The chemical reactions and pathways resulting in the biosynthesis of deoxyribose phosphate, the phosphorylated sugar 2-deoxy-erythro-pentose." [GOC:chem_mtg]	500	2557	93	21118	0.0363707	0.186	query_1	['GO:0019637', 'GO:1901576']
553	GO:BP	GO:0031570	DNA integrity checkpoint signaling	0.036439	TRUE	"A signaling process that controls cell cycle progression in response to changes in DNA structure by monitoring the integrity of the DNA. The DNA integrity checkpoint begins with detection of DNA damage, defects in DNA structure or DNA replication, and progresses through signal transduction and ends with cell cycle effector processes." [GOC:mtg_cell_cycle]	95	2557	27	21118	0.0105592	0.284211	query_1	['GO:0000075']
554	GO:BP	GO:0031329	regulation of cellular catabolic process	0.037583	TRUE	"Any process that modulates the frequency, rate or extent of the chemical reactions and pathways resulting in the breakdown of substances, carried out by individual cells." [GOC:mah]	745	2557	129	21118	0.0504497	0.173154	query_1	['GO:0009894', 'GO:0031323', 'GO:0044248']
555	GO:BP	GO:0070647	protein modification by small protein conjugation or removal	0.0380499	TRUE	"A protein modification process in which one or more groups of a small protein, such as ubiquitin or a ubiquitin-like protein, are covalently attached to or removed from a target protein." [GOC:mah]	941	2557	157	21118	0.0614001	0.166844	query_1	['GO:0006464']
556	GO:BP	GO:0031507	heterochromatin assembly	0.0380683	TRUE	"The assembly of chromatin into heterochromatin, a compact and highly condensed form that is often, but not always, transcriptionally silent." [GOC:mah]	42	2557	16	21118	0.00625733	0.380952	query_1	['GO:0006338', 'GO:0031497', 'GO:0051276', 'GO:0070828', 'GO:0097549']
557	GO:BP	GO:0043393	regulation of protein binding	0.0384254	TRUE	"Any process that modulates the frequency, rate or extent of protein binding." [GOC:go_curators]	214	2557	48	21118	0.018772	0.224299	query_1	['GO:0051098']
558	GO:BP	GO:1902410	mitotic cytokinetic process	0.0393399	TRUE	"Any cytokinetic process that is involved in mitotic cell cycle." [GOC:mtg_cell_cycle, GOC:TermGenie]	22	2557	11	21118	0.00430192	0.5	query_1	['GO:0000281', 'GO:0032506', 'GO:1903047']
559	GO:BP	GO:0018193	peptidyl-amino acid modification	0.0404144	TRUE	"The alteration of an amino acid residue in a peptide." [GOC:mah]	1264	2557	202	21118	0.0789988	0.15981	query_1	['GO:0006464']
560	GO:BP	GO:0000413	protein peptidyl-prolyl isomerization	0.042467	TRUE	"The modification of a protein by cis-trans isomerization of a proline residue." [GOC:krc, PMID:16959570]	38	2557	15	21118	0.00586625	0.394737	query_1	['GO:0018208']
561	GO:BP	GO:0032388	positive regulation of intracellular transport	0.0425386	TRUE	"Any process that activates or increases the frequency, rate or extent of the directed movement of substances within cells." [GOC:mah]	191	2557	44	21118	0.0172077	0.230366	query_1	['GO:0032386', 'GO:0046907', 'GO:0048522', 'GO:0051050']
562	GO:BP	GO:0032984	protein-containing complex disassembly	0.0437454	TRUE	"The disaggregation of a protein-containing macromolecular complex into its constituent components." [GOC:mah]	215	2557	48	21118	0.018772	0.223256	query_1	['GO:0022411', 'GO:0043933']
563	GO:BP	GO:0006352	DNA-templated transcription, initiation	0.0460015	TRUE	"Any process involved in the assembly of the RNA polymerase preinitiation complex (PIC) at the core promoter region of a DNA template, resulting in the subsequent synthesis of RNA from that promoter. The initiation phase includes PIC assembly and the formation of the first few bonds in the RNA chain, including abortive initiation, which occurs when the first few nucleotides are repeatedly synthes…	123	2557	32	21118	0.0125147	0.260163	query_1	['GO:0006351', 'GO:0032774']
564	GO:BP	GO:0031062	positive regulation of histone methylation	0.0462645	TRUE	"Any process that activates or increases the frequency, rate or extent of the covalent addition of methyl groups to histones." [GOC:mah]	47	2557	17	21118	0.00664842	0.361702	query_1	['GO:0016571', 'GO:0031058', 'GO:0031060']
565	GO:BP	GO:0006368	transcription elongation from RNA polymerase II promoter	0.0462645	TRUE	"The extension of an RNA molecule after transcription initiation and promoter clearance at an RNA polymerase II promoter by the addition of ribonucleotides catalyzed by RNA polymerase II." [GOC:mah, GOC:txnOH]	47	2557	17	21118	0.00664842	0.361702	query_1	['GO:0006354', 'GO:0006366']
566	GO:BP	GO:0031334	positive regulation of protein-containing complex assembly	0.0482824	TRUE	"Any process that activates or increases the frequency, rate or extent of protein complex assembly." [GOC:mah]	240	2557	52	21118	0.0203363	0.216667	query_1	['GO:0043254', 'GO:0044089', 'GO:0051130', 'GO:0065003']
567	GO:BP	GO:0010256	endomembrane system organization	0.0497322	TRUE	"A process that is carried out at the cellular level which results in the assembly, arrangement of constituent parts, or disassembly of the endomembrane system." [GOC:mah, GOC:sm]	464	2557	87	21118	0.0340242	0.1875	query_1	['GO:0016043']
568	GO:BP	GO:0031056	regulation of histone modification	0.0502651	FALSE	"Any process that modulates the frequency, rate or extent of the covalent alteration of a histone." [GOC:mah]	163	2557	39	21118	0.0152522	0.239264	query_1	['GO:0016570', 'GO:0031399', 'GO:1902275']
569	GO:BP	GO:0048513	animal organ development	0.0508863	FALSE	"Development of a tissue or tissues that work together to perform a specific function or functions. Development pertains to the process whose specific outcome is the progression of a structure over time, from its formation to the mature structure. Organs are commonly observed as visibly distinct structures, but may also exist as loosely associated clusters of cells that work together to perform a…	3617	2557	513	21118	0.200626	0.14183	query_1	['GO:0048731', 'GO:0048856']
570	GO:BP	GO:1901673	regulation of mitotic spindle assembly	0.054373	FALSE	"Any process that modulates the frequency, rate or extent of mitotic spindle assembly." [GOC:TermGenie]	19	2557	10	21118	0.00391083	0.526316	query_1	['GO:0060236', 'GO:0090169', 'GO:0090307']
571	GO:BP	GO:0019220	regulation of phosphate metabolic process	0.0544758	FALSE	"Any process that modulates the frequency, rate or extent of the chemical reactions and pathways involving phosphates." [GOC:go_curators]	1555	2557	241	21118	0.0942511	0.154984	query_1	['GO:0006796', 'GO:0051174']
572	GO:BP	GO:0032535	regulation of cellular component size	0.0549857	FALSE	"A process that modulates the size of a cellular component." [GOC:mah]	406	2557	78	21118	0.0305045	0.192118	query_1	['GO:0016043', 'GO:0090066']
573	GO:BP	GO:0051174	regulation of phosphorus metabolic process	0.0569433	FALSE	"Any process that modulates the frequency, rate or extent of the chemical reactions and pathways involving phosphorus or compounds containing phosphorus." [GOC:ai]	1556	2557	241	21118	0.0942511	0.154884	query_1	['GO:0006793', 'GO:0031323']
574	GO:BP	GO:0050793	regulation of developmental process	0.0578941	FALSE	"Any process that modulates the frequency, rate or extent of development, the biological process whose specific outcome is the progression of a multicellular organism over time from an initial condition (e.g. a zygote, or a young adult) to a later condition (e.g. a multicellular animal or an aged adult)." [GOC:go_curators]	2591	2557	379	21118	0.148221	0.146276	query_1	['GO:0032502', 'GO:0050789']
575	GO:BP	GO:0008630	intrinsic apoptotic signaling pathway in response to DNA damage	0.0587558	FALSE	"A series of molecular signals in which an intracellular signal is conveyed to trigger the apoptotic death of a cell. The pathway is induced by the detection of DNA damage, and ends when the execution phase of apoptosis is triggered." [GOC:go_curators, GOC:mtg_apoptosis]	108	2557	29	21118	0.0113414	0.268519	query_1	['GO:0006974', 'GO:0097193']
576	GO:BP	GO:0051347	positive regulation of transferase activity	0.0597177	FALSE	"Any process that activates or increases the frequency, rate or extent of transferase activity, the catalysis of the transfer of a group, e.g. a methyl group, glycosyl group, acyl group, phosphorus-containing, or other groups, from a donor compound to an acceptor." [GOC:ai]	628	2557	111	21118	0.0434102	0.176752	query_1	['GO:0043085', 'GO:0051338']
577	GO:BP	GO:0032989	cellular component morphogenesis	0.0598994	FALSE	"The process in which cellular structures, including whole cells or cell parts, are generated and organized." [GOC:dph, GOC:mah, GOC:tb]	794	2557	135	21118	0.0527962	0.170025	query_1	['GO:0009653', 'GO:0016043', 'GO:0048869']
578	GO:BP	GO:0071478	cellular response to radiation	0.0600378	FALSE	"Any process that results in a change in state or activity of a cell (in terms of movement, secretion, enzyme production, gene expression, etc.) as a result of an electromagnetic radiation stimulus. Electromagnetic radiation is a propagating wave in space with electric and magnetic components. These components oscillate at right angles to each other and to the direction of propagation." [GOC:mah]	170	2557	40	21118	0.0156433	0.235294	query_1	['GO:0009314', 'GO:0071214']
579	GO:BP	GO:0090224	regulation of spindle organization	0.0613122	FALSE	"Any process that modulates the rate, frequency or extent of the assembly, arrangement of constituent parts, or disassembly of the microtubule spindle." [GOC:ascb_2009, GOC:dph, GOC:tb]	39	2557	15	21118	0.00586625	0.384615	query_1	['GO:0007051', 'GO:0010564', 'GO:0070507']
580	GO:BP	GO:0050769	positive regulation of neurogenesis	0.0619274	FALSE	"Any process that activates or increases the frequency, rate or extent of neurogenesis, the generation of cells within the nervous system." [GOC:ai]	273	2557	57	21118	0.0222917	0.208791	query_1	['GO:0010720', 'GO:0022008', 'GO:0050767', 'GO:0051962']
581	GO:BP	GO:0032879	regulation of localization	0.0623279	FALSE	"Any process that modulates the frequency, rate or extent of any process in which a cell, a substance, or a cellular entity is transported to, or maintained in, a specific location." [GOC:mah]	2868	2557	415	21118	0.1623	0.1447	query_1	['GO:0050789', 'GO:0051179']
582	GO:BP	GO:0010243	response to organonitrogen compound	0.0645759	FALSE	"Any process that results in a change in state or activity of a cell or an organism (in terms of movement, secretion, enzyme production, gene expression, etc.) as a result of an organonitrogen stimulus. An organonitrogen compound is formally a compound containing at least one carbon-nitrogen bond." [PMID:9869419]	1093	2557	177	21118	0.0692217	0.16194	query_1	['GO:0010033', 'GO:1901698']
583	GO:BP	GO:0075525	viral translational termination-reinitiation	0.0648389	FALSE	"A process which occurs as part of viral mRNA translation which allows expression of a downstream open reading frame (ORF) in a dicistronic mRNA. In this process, ribosomes translate the upstream ORF but following termination, a proportion of 40S subunits remain tethered to the mRNA and go on to re-initiate translation at the start codon of the downstream ORF." [GOC:bf, GOC:ch, GOC:jl, PMID:18631…	5	2557	5	21118	0.00195542	1	query_1	['GO:0016032', 'GO:0019081']
584	GO:BP	GO:0048588	developmental cell growth	0.064975	FALSE	"The growth of a cell, where growth contributes to the progression of the cell over time from one condition to another." [GOC:go_curators, GOC:isa_complete]	261	2557	55	21118	0.0215096	0.210728	query_1	['GO:0016049', 'GO:0048468', 'GO:0048589']
585	GO:BP	GO:0045597	positive regulation of cell differentiation	0.0650372	FALSE	"Any process that activates or increases the frequency, rate or extent of cell differentiation." [GOC:go_curators]	922	2557	153	21118	0.0598357	0.165944	query_1	['GO:0030154', 'GO:0045595', 'GO:0048522', 'GO:0051094']
586	GO:BP	GO:0060236	regulation of mitotic spindle organization	0.0678337	FALSE	"Any process that modulates the rate, frequency or extent of the assembly, arrangement of constituent parts, or disassembly of the microtubule spindle during a mitotic cell cycle." [GOC:ascb_2009, GOC:dph, GOC:tb]	35	2557	14	21118	0.00547517	0.4	query_1	['GO:0007052', 'GO:0090224']
587	GO:BP	GO:0040008	regulation of growth	0.0681894	FALSE	"Any process that modulates the frequency, rate or extent of the growth of all or part of an organism so that it occurs at its proper speed, either globally or in a specific part of the organism's development." [GOC:ems, GOC:mah]	678	2557	118	21118	0.0461478	0.174041	query_1	['GO:0040007', 'GO:0050789']
588	GO:BP	GO:0043066	negative regulation of apoptotic process	0.0695703	FALSE	"Any process that stops, prevents, or reduces the frequency, rate or extent of cell death by apoptotic process." [GOC:jl, GOC:mtg_apoptosis]	980	2557	161	21118	0.0629644	0.164286	query_1	['GO:0006915', 'GO:0042981', 'GO:0043069']
589	GO:BP	GO:0009411	response to UV	0.0705619	FALSE	"Any process that results in a change in state or activity of a cell or an organism (in terms of movement, secretion, enzyme production, gene expression, etc.) as a result of an ultraviolet radiation (UV light) stimulus. Ultraviolet radiation is electromagnetic radiation with a wavelength in the range of 10 to 380 nanometers." [GOC:hb]	148	2557	36	21118	0.014079	0.243243	query_1	['GO:0009416']
590	GO:BP	GO:0072359	circulatory system development	0.0708326	FALSE	"The process whose specific outcome is the progression of the circulatory system over time, from its formation to the mature structure. The circulatory system is the organ system that passes nutrients (such as amino acids and electrolytes), gases, hormones, blood cells, etc. to and from cells in the body to help fight diseases and help stabilize body temperature and pH to maintain homeostasis." […	1174	2557	188	21118	0.0735237	0.160136	query_1	['GO:0048731']
591	GO:BP	GO:0022616	DNA strand elongation	0.0708655	FALSE	"The DNA metabolic process in which an existing DNA strand is extended by activities including the addition of nucleotides to the 3' end of the strand." [GOC:isa_complete, GOC:mah]	16	2557	9	21118	0.00351975	0.5625	query_1	['GO:0006259']
592	GO:BP	GO:0070828	heterochromatin organization	0.0713079	FALSE	"Any process that results in the specification, formation or maintenance of the physical structure of eukaryotic heterochromatin, a compact and highly condensed form of chromatin." [GOC:mah]	53	2557	18	21118	0.0070395	0.339623	query_1	['GO:0006325']
593	GO:BP	GO:1900182	positive regulation of protein localization to nucleus	0.0714635	FALSE	"Any process that activates or increases the frequency, rate or extent of protein localization to nucleus." [GOC:TermGenie]	93	2557	26	21118	0.0101682	0.27957	query_1	['GO:0034504', 'GO:1900180', 'GO:1903829']
594	GO:BP	GO:0060537	muscle tissue development	0.072217	FALSE	"The progression of muscle tissue over time, from its initial formation to its mature state. Muscle tissue is a contractile tissue made up of actin and myosin fibers." [GOC:dph]	442	2557	83	21118	0.0324599	0.187783	query_1	['GO:0009888']
595	GO:BP	GO:0010971	positive regulation of G2/M transition of mitotic cell cycle	0.0725674	FALSE	"Any signalling pathway that activates or increases the activity of a cell cycle cyclin-dependent protein kinase to modulate the switch from G2 phase to M phase of the mitotic cell cycle." [GOC:dph, GOC:mtg_cell_cycle, GOC:tb]	27	2557	12	21118	0.004693	0.444444	query_1	['GO:0000086', 'GO:0010389', 'GO:1901992', 'GO:1902751']
596	GO:BP	GO:0060322	head development	0.0766002	FALSE	"The biological process whose specific outcome is the progression of a head from an initial condition to its mature state. The head is the anterior-most division of the body." [GOC:dph]	805	2557	136	21118	0.0531873	0.168944	query_1	['GO:0048856']
597	GO:BP	GO:0046822	regulation of nucleocytoplasmic transport	0.0775106	FALSE	"Any process that modulates the frequency, rate or extent of the directed movement of substances between the nucleus and the cytoplasm." [GOC:bf]	126	2557	32	21118	0.0125147	0.253968	query_1	['GO:0006913', 'GO:0032386']
598	GO:BP	GO:0007144	female meiosis I	0.0813347	FALSE	"The cell cycle process in which the first meiotic division occurs in the female germline." [GOC:mah]	10	2557	7	21118	0.00273758	0.7	query_1	['GO:0007127', 'GO:0007143']
599	GO:BP	GO:0006271	DNA strand elongation involved in DNA replication	0.0813347	FALSE	"The process in which an existing DNA strand is extended by activities including the addition of nucleotides to the 3' end of the strand, complementary to an existing template, as part of DNA replication." [GOC:mah, ISBN:071673706X, ISBN:0815316194]	10	2557	7	21118	0.00273758	0.7	query_1	['GO:0006261', 'GO:0022616']
600	GO:BP	GO:1900262	regulation of DNA-directed DNA polymerase activity	0.0813347	FALSE	"Any process that modulates the frequency, rate or extent of DNA-directed DNA polymerase activity." [GOC:TermGenie]	10	2557	7	21118	0.00273758	0.7	query_1	['GO:0051338', 'GO:0090329', 'GO:2000278']
601	GO:BP	GO:0009265	2'-deoxyribonucleotide biosynthetic process	0.0813347	FALSE	"The chemical reactions and pathways resulting in the formation of a 2'-deoxyribonucleotide, a compound consisting of 2'-deoxyribonucleoside (a base linked to a 2'-deoxyribose sugar) esterified with a phosphate group at either the 3' or 5'-hydroxyl group of the sugar." [GOC:mah]	10	2557	7	21118	0.00273758	0.7	query_1	['GO:0009263', 'GO:0009394', 'GO:0046385']
602	GO:BP	GO:1900264	positive regulation of DNA-directed DNA polymerase activity	0.0813347	FALSE	"Any process that activates or increases the frequency, rate or extent of DNA-directed DNA polymerase activity." [GOC:TermGenie]	10	2557	7	21118	0.00273758	0.7	query_1	['GO:0051347', 'GO:1900262', 'GO:2000573']
603	GO:BP	GO:0046385	deoxyribose phosphate biosynthetic process	0.0813347	FALSE	"The chemical reactions and pathways resulting in the formation of deoxyribose phosphate, the phosphorylated sugar 2-deoxy-erythro-pentose." [ISBN:0198506732]	10	2557	7	21118	0.00273758	0.7	query_1	['GO:0019692', 'GO:0090407', 'GO:1901137']
604	GO:BP	GO:0000492	box C/D snoRNP assembly	0.0813347	FALSE	"The aggregation, arrangement and bonding together of proteins and a box C/D snoRNA to form a box C/D small nucleolar ribonucleoprotein (snoRNP) complex." [GOC:krc]	10	2557	7	21118	0.00273758	0.7	query_1	['GO:0000491']
605	GO:BP	GO:0030041	actin filament polymerization	0.082989	FALSE	"Assembly of actin filaments by the addition of actin monomers to a filament." [GOC:mah]	190	2557	43	21118	0.0168166	0.226316	query_1	['GO:0008154', 'GO:0051258']
606	GO:BP	GO:1904816	positive regulation of protein localization to chromosome, telomeric region	0.083596	FALSE	"Any process that activates or increases the frequency, rate or extent of protein localization to chromosome, telomeric region." [GO_REF:0000058, GOC:BHF, GOC:BHF_telomere, GOC:nc, GOC:TermGenie, PMID:19487455]	13	2557	8	21118	0.00312867	0.615385	query_1	['GO:0070198', 'GO:1903829', 'GO:1904814']
607	GO:BP	GO:0051984	positive regulation of chromosome segregation	0.083596	FALSE	"Any process that activates or increases the frequency, rate or extent of chromosome segregation, the process in which genetic material, in the form of chromosomes, is organized and then physically separated and apportioned to two or more sets." [GOC:ai]	13	2557	8	21118	0.00312867	0.615385	query_1	['GO:0007059', 'GO:0048522', 'GO:0051983']
608	GO:BP	GO:0006810	transport	0.0845746	FALSE	"The directed movement of substances (such as macromolecules, small molecules, ions) or cellular components (such as complexes and organelles) into, out of or within a cell, or between cells, or within a multicellular organism by means of some agent such as a transporter, pore or motor protein." [GOC:dos, GOC:dph, GOC:jl, GOC:mah]	4502	2557	624	21118	0.244036	0.138605	query_1	['GO:0051234']
609	GO:BP	GO:0065008	regulation of biological quality	0.0859177	FALSE	"Any process that modulates a qualitative or quantitative trait of a biological quality. A biological quality is a measurable attribute of an organism or part of an organism, such as size, mass, shape, color, etc." [GOC:dph, GOC:isa_complete, GOC:mah, GOC:pr, GOC:vw]	3876	2557	544	21118	0.212749	0.140351	query_1	['GO:0065007']
610	GO:BP	GO:0019693	ribose phosphate metabolic process	0.0867972	FALSE	"The chemical reactions and pathways involving ribose phosphate, any phosphorylated ribose sugar." [GOC:ai]	385	2557	74	21118	0.0289402	0.192208	query_1	['GO:0006796', 'GO:0019637', 'GO:1901135']
611	GO:BP	GO:1903322	positive regulation of protein modification by small protein conjugation or removal	0.0877682	FALSE	"Any process that activates or increases the frequency, rate or extent of protein modification by small protein conjugation or removal." [GO_REF:0000058, GOC:TermGenie, GOC:vw]	138	2557	34	21118	0.0132968	0.246377	query_1	['GO:0031401', 'GO:0070647', 'GO:1903320']
612	GO:BP	GO:0007015	actin filament organization	0.0898674	FALSE	"A process that is carried out at the cellular level which results in the assembly, arrangement of constituent parts, or disassembly of cytoskeletal structures comprising actin filaments. Includes processes that control the spatial distribution of actin filaments, such as organizing filaments into meshworks, bundles, or other structures, as by cross-linking." [GOC:mah]	438	2557	82	21118	0.0320688	0.187215	query_1	['GO:0030036', 'GO:0097435']
613	GO:BP	GO:0034401	chromatin organization involved in regulation of transcription	0.0921034	FALSE	"Any cellular process that results in the specification, formation or maintenance of the physical structure of eukaryotic chromatin that modulates the rate, frequency or extent of DNA-dependent transcription." [GOC:curators, PMID:21102443]	144	2557	35	21118	0.0136879	0.243056	query_1	['GO:0006325', 'GO:0006355']
614	GO:BP	GO:0007006	mitochondrial membrane organization	0.0924155	FALSE	"A process that is carried out at the cellular level which results in the assembly, arrangement of constituent parts, or disassembly of a mitochondrial membrane, either of the lipid bilayer surrounding a mitochondrion." [GOC:ai, GOC:dph, GOC:jl, GOC:mah]	105	2557	28	21118	0.0109503	0.266667	query_1	['GO:0007005', 'GO:0061024']
615	GO:BP	GO:0032386	regulation of intracellular transport	0.0936181	FALSE	"Any process that modulates the frequency, rate or extent of the directed movement of substances within cells." [GOC:mah]	334	2557	66	21118	0.0258115	0.197605	query_1	['GO:0046907', 'GO:0051049', 'GO:0060341']
616	GO:BP	GO:0008064	regulation of actin polymerization or depolymerization	0.0947415	FALSE	"Any process that modulates the frequency, rate or extent of the assembly or disassembly of actin filaments by the addition or removal of actin monomers from a filament." [GOC:mah]	191	2557	43	21118	0.0168166	0.225131	query_1	['GO:0008154', 'GO:0030832', 'GO:0110053']
617	GO:BP	GO:0014706	striated muscle tissue development	0.0963255	FALSE	"The process whose specific outcome is the progression of a striated muscle over time, from its formation to the mature structure. Striated muscle contain fibers that are divided by transverse bands into striations, and cardiac and skeletal muscle are types of striated muscle. Skeletal muscle myoblasts fuse to form myotubes and eventually multinucleated muscle fibers. The fusion of cardiac cells …	419	2557	79	21118	0.0308956	0.188544	query_1	['GO:0060537']
618	GO:BP	GO:0060544	regulation of necroptotic process	0.0969306	FALSE	"Any process that modulates the rate, frequency or extent of a necroptotic process, a necrotic cell death process that results from the activation of endogenous cellular processes, such as signaling involving death domain receptors or Toll-like receptors." [GOC:BHF, GOC:dph, GOC:mtg_apoptosis, GOC:tb]	20	2557	10	21118	0.00391083	0.5	query_1	['GO:0062098', 'GO:0070266']
619	GO:BP	GO:0051571	positive regulation of histone H3-K4 methylation	0.0969306	FALSE	"Any process that activates or increases the frequency, rate or extent of the covalent addition of a methyl group to the lysine at position 4 of histone H3." [GOC:mah]	20	2557	10	21118	0.00391083	0.5	query_1	['GO:0031062', 'GO:0051568', 'GO:0051569']
620	GO:BP	GO:0072521	purine-containing compound metabolic process	0.0977321	FALSE	"The chemical reactions and pathways involving a purine-containing compound, i.e. any compound that contains purine or a formal derivative thereof." [GOC:mah]	406	2557	77	21118	0.0301134	0.189655	query_1	['GO:0006725', 'GO:0034641', 'GO:0046483', 'GO:1901360', 'GO:1901564']
621	GO:BP	GO:1902229	regulation of intrinsic apoptotic signaling pathway in response to DNA damage	0.0986768	FALSE	"Any process that modulates the frequency, rate or extent of intrinsic apoptotic signaling pathway in response to DNA damage." [GOC:BHF, GOC:mtg_apoptosis, GOC:rl, GOC:TermGenie, PMID:15314165]	36	2557	14	21118	0.00547517	0.388889	query_1	['GO:0008630', 'GO:2001020', 'GO:2001242']
622	GO:BP	GO:1903313	positive regulation of mRNA metabolic process	0.101256	FALSE	"Any process that activates or increases the frequency, rate or extent of mRNA metabolic process." [GO_REF:0000058, GOC:TermGenie, GOC:vw]	122	2557	31	21118	0.0121236	0.254098	query_1	['GO:0016071', 'GO:0051254', 'GO:1903311']
623	GO:BP	GO:0009966	regulation of signal transduction	0.103782	FALSE	"Any process that modulates the frequency, rate or extent of signal transduction." [GOC:sm]	2853	2557	411	21118	0.160735	0.144059	query_1	['GO:0007165', 'GO:0010646', 'GO:0023051', 'GO:0048583']
624	GO:BP	GO:0010720	positive regulation of cell development	0.104002	FALSE	"Any process that increases the rate, frequency or extent of the progression of the cell over time, from its formation to the mature structure. Cell development does not include the steps involved in committing a cell to a specific fate." [GOC:BHF, GOC:dph, GOC:tb]	348	2557	68	21118	0.0265937	0.195402	query_1	['GO:0045597', 'GO:0048468', 'GO:0060284']
625	GO:BP	GO:0033157	regulation of intracellular protein transport	0.104588	FALSE	"Any process that modulates the frequency, rate or extent of the directed movement of proteins within cells." [GOC:mah]	222	2557	48	21118	0.018772	0.216216	query_1	['GO:0006886', 'GO:0032386', 'GO:0051223', 'GO:1903827']
626	GO:BP	GO:0010810	regulation of cell-substrate adhesion	0.105849	FALSE	"Any process that modulates the frequency, rate or extent of cell-substrate adhesion. Cell-substrate adhesion is the attachment of a cell to the underlying substrate via adhesion molecules." [GOC:dph, GOC:pf, GOC:tb]	216	2557	47	21118	0.0183809	0.217593	query_1	['GO:0030155', 'GO:0031589']
627	GO:BP	GO:0032774	RNA biosynthetic process	0.107236	FALSE	"The chemical reactions and pathways resulting in the formation of RNA, ribonucleic acid, one of the two main type of nucleic acid, consisting of a long, unbranched macromolecule formed from ribonucleotides joined in 3',5'-phosphodiester linkage. Includes polymerization of ribonucleotide monomers. Refers not only to transcription but also to e.g. viral RNA replication." [GOC:mah, GOC:txnOH]	3549	2557	501	21118	0.195933	0.141167	query_1	['GO:0009059', 'GO:0016070', 'GO:0034654']
628	GO:BP	GO:0030832	regulation of actin filament length	0.107997	FALSE	"Any process that controls the length of actin filaments in a cell." [GOC:dph, GOC:mah]	192	2557	43	21118	0.0168166	0.223958	query_1	['GO:0032535', 'GO:0032956']
629	GO:BP	GO:1900180	regulation of protein localization to nucleus	0.111437	FALSE	"Any process that modulates the frequency, rate or extent of protein localization to nucleus." [GOC:TermGenie]	151	2557	36	21118	0.014079	0.238411	query_1	['GO:0034504', 'GO:1903827']
630	GO:BP	GO:0031440	regulation of mRNA 3'-end processing	0.113025	FALSE	"Any process that modulates the frequency, rate or extent of mRNA 3'-end processing, any process involved in forming the mature 3' end of an mRNA molecule." [GOC:mah]	28	2557	12	21118	0.004693	0.428571	query_1	['GO:0031124', 'GO:0050684']
631	GO:BP	GO:1901565	organonitrogen compound catabolic process	0.113983	FALSE	"The chemical reactions and pathways resulting in the breakdown of organonitrogen compound." [GOC:pr, GOC:TermGenie]	1249	2557	197	21118	0.0770434	0.157726	query_1	['GO:1901564', 'GO:1901575']
632	GO:BP	GO:0034250	positive regulation of cellular amide metabolic process	0.117509	FALSE	"Any process that activates or increases the frequency, rate or extent of the chemical reactions and pathways involving amides." [GOC:mah]	163	2557	38	21118	0.0148612	0.233129	query_1	['GO:0031325', 'GO:0034248', 'GO:0043603', 'GO:0051173']
633	GO:BP	GO:0051146	striated muscle cell differentiation	0.118128	FALSE	"The process in which a relatively unspecialized cell acquires specialized features of a striated muscle cell; striated muscle fibers are divided by transverse bands into striations, and cardiac and voluntary muscle are types of striated muscle." [CL:0000737, GOC:ai]	298	2557	60	21118	0.023465	0.201342	query_1	['GO:0042692']
634	GO:BP	GO:0002181	cytoplasmic translation	0.120481	FALSE	"The chemical reactions and pathways resulting in the formation of a protein in the cytoplasm. This is a ribosome-mediated process in which the information in messenger RNA (mRNA) is used to specify the sequence of amino acids in the protein." [GOC:hjd]	101	2557	27	21118	0.0105592	0.267327	query_1	['GO:0006412']
635	GO:BP	GO:0031123	RNA 3'-end processing	0.120481	FALSE	"Any process involved in forming the mature 3' end of an RNA molecule." [GOC:mah]	101	2557	27	21118	0.0105592	0.267327	query_1	['GO:0006396']
636	GO:BP	GO:0030833	regulation of actin filament polymerization	0.121224	FALSE	"Any process that modulates the frequency, rate or extent of the assembly of actin filaments by the addition of actin monomers to a filament." [GOC:mah]	175	2557	40	21118	0.0156433	0.228571	query_1	['GO:0008064', 'GO:0030041', 'GO:0032271']
637	GO:BP	GO:0030705	cytoskeleton-dependent intracellular transport	0.122272	FALSE	"The directed movement of substances along cytoskeletal fibers such as microfilaments or microtubules within a cell." [GOC:mah]	181	2557	41	21118	0.0160344	0.226519	query_1	['GO:0046907']
638	GO:BP	GO:0070201	regulation of establishment of protein localization	0.12362	FALSE	"Any process that modulates the frequency, rate or extent of the directed movement of a protein to a specific location." [GOC:BHF, GOC:mah]	570	2557	101	21118	0.0394994	0.177193	query_1	['GO:0032880', 'GO:0045184']
639	GO:BP	GO:0007568	aging	0.124573	FALSE	"A developmental process that is a deterioration and loss of function over time. Aging includes loss of functions such as resistance to disease, homeostasis, and fertility, as well as wear and tear. Aging includes cellular senescence, but is more inclusive. May precede death and may succeed developmental maturation (GO:0021700)." [GOC:PO_curators]	337	2557	66	21118	0.0258115	0.195846	query_1	['GO:0032502']
640	GO:BP	GO:0000381	regulation of alternative mRNA splicing, via spliceosome	0.125269	FALSE	"Any process that modulates the frequency, rate or extent of alternative splicing of nuclear mRNAs." [GOC:krc]	55	2557	18	21118	0.0070395	0.327273	query_1	['GO:0000380', 'GO:0048024']
641	GO:BP	GO:0006928	movement of cell or subcellular component	0.125579	FALSE	"The directed, self-propelled movement of a cell or subcellular component without the involvement of an external agent such as a transporter or a pore." [GOC:dgh, GOC:dph, GOC:jl, GOC:mlg]	2075	2557	308	21118	0.120454	0.148434	query_1	['GO:0009987']
642	GO:BP	GO:0048468	cell development	0.126845	FALSE	"The process whose specific outcome is the progression of the cell over time, from its formation to the mature structure. Cell development does not include the steps involved in committing a cell to a specific fate." [GOC:go_curators]	2340	2557	343	21118	0.134142	0.146581	query_1	['GO:0030154', 'GO:0048856', 'GO:0048869']
643	GO:BP	GO:0060284	regulation of cell development	0.12937	FALSE	"Any process that modulates the rate, frequency or extent of the progression of the cell over time, from its formation to the mature structure. Cell development does not include the steps involved in committing a cell to a specific fate." [GOC:dph, GOC:tb]	557	2557	99	21118	0.0387172	0.177738	query_1	['GO:0045595', 'GO:0048468']
644	GO:BP	GO:2001234	negative regulation of apoptotic signaling pathway	0.130353	FALSE	"Any process that stops, prevents or reduces the frequency, rate or extent of apoptotic signaling pathway." [GOC:mtg_apoptosis]	230	2557	49	21118	0.0191631	0.213043	query_1	['GO:0009968', 'GO:0043066', 'GO:0097190', 'GO:2001233']
645	GO:BP	GO:0051101	regulation of DNA binding	0.132315	FALSE	"Any process that modulates the frequency, rate or extent of DNA binding. DNA binding is any process in which a gene product interacts selectively with DNA (deoxyribonucleic acid)." [GOC:ai, GOC:dph, GOC:tb]	118	2557	30	21118	0.0117325	0.254237	query_1	['GO:0051098']
646	GO:BP	GO:1902369	negative regulation of RNA catabolic process	0.132352	FALSE	"Any process that stops, prevents or reduces the frequency, rate or extent of RNA catabolic process." [GOC:bf, GOC:TermGenie, PMID:16640457]	70	2557	21	21118	0.00821275	0.3	query_1	['GO:0006401', 'GO:0031330', 'GO:0051253']
647	GO:BP	GO:0031401	positive regulation of protein modification process	0.132758	FALSE	"Any process that activates or increases the frequency, rate or extent of the covalent alteration of one or more amino acid residues within a protein." [GOC:mah, GOC:tb]	1071	2557	172	21118	0.0672663	0.160598	query_1	['GO:0006464', 'GO:0031399', 'GO:0032270']
648	GO:BP	GO:0007420	brain development	0.132919	FALSE	"The process whose specific outcome is the progression of the brain over time, from its formation to the mature structure. Brain development begins with patterning events in the neural tube and ends with the mature structure that is the center of thought and emotion. The brain is responsible for the coordination and control of bodily activities and the interpretation of information from the sense…	758	2557	128	21118	0.0500587	0.168865	query_1	['GO:0007417', 'GO:0048513', 'GO:0060322']
649	GO:BP	GO:0140053	mitochondrial gene expression	0.133479	FALSE	"The process in which a mitochondrial gene's sequence is converted into a mature gene product or products (proteins or RNA). This includes the production of an RNA transcript as well as any processing to produce a mature RNA product or an mRNA or circRNA (for protein-coding genes) and the translation of that mRNA or circRNA into protein. Protein maturation is included when required to form an act…	107	2557	28	21118	0.0109503	0.261682	query_1	['GO:0010467']
650	GO:BP	GO:0000212	meiotic spindle organization	0.134374	FALSE	"A process that is carried out at the cellular level which results in the assembly, arrangement of constituent parts, or disassembly of the microtubule spindle during a meiotic cell cycle." [GOC:go_curators, GOC:mah]	17	2557	9	21118	0.00351975	0.529412	query_1	['GO:0007051', 'GO:1903046']
651	GO:BP	GO:0016055	Wnt signaling pathway	0.137409	FALSE	"The series of molecular signals initiated by binding of a Wnt protein to a frizzled family receptor on the surface of the target cell and ending with a change in cell state." [GOC:dph, GOC:go_curators, PMID:11532397]	410	2557	77	21118	0.0301134	0.187805	query_1	['GO:0198738', 'GO:1905114']
652	GO:BP	GO:0006479	protein methylation	0.139714	FALSE	"The addition of a methyl group to a protein amino acid. A methyl group is derived from methane by the removal of a hydrogen atom." [GOC:ai]	194	2557	43	21118	0.0168166	0.221649	query_1	['GO:0008213', 'GO:0043414']
653	GO:BP	GO:0008213	protein alkylation	0.139714	FALSE	"The addition of an alkyl group to a protein amino acid. An alkyl group is any group derived from an alkane by removal of one hydrogen atom." [GOC:ma]	194	2557	43	21118	0.0168166	0.221649	query_1	['GO:0006464']
654	GO:BP	GO:0050685	positive regulation of mRNA processing	0.141067	FALSE	"Any process that activates or increases the frequency, rate or extent of mRNA processing." [GOC:ai]	46	2557	16	21118	0.00625733	0.347826	query_1	['GO:0006397', 'GO:0050684', 'GO:1903313']
655	GO:BP	GO:0030010	establishment of cell polarity	0.145357	FALSE	"The specification and formation of anisotropic intracellular organization or cell growth patterns." [GOC:mah]	147	2557	35	21118	0.0136879	0.238095	query_1	['GO:0007163']
656	GO:BP	GO:0090316	positive regulation of intracellular protein transport	0.145357	FALSE	"Any process that activates or increases the frequency, rate or extent of the directed movement of proteins within cells." [GOC:tb]	147	2557	35	21118	0.0136879	0.238095	query_1	['GO:0006886', 'GO:0032388', 'GO:0033157', 'GO:0051222']
657	GO:BP	GO:0008637	apoptotic mitochondrial changes	0.145591	FALSE	"The morphological and physiological alterations undergone by mitochondria during apoptosis." [GOC:mah, GOC:mtg_apoptosis]	113	2557	29	21118	0.0113414	0.256637	query_1	['GO:0006915', 'GO:0007005']
658	GO:BP	GO:0006163	purine nucleotide metabolic process	0.154376	FALSE	"The chemical reactions and pathways involving a purine nucleotide, a compound consisting of nucleoside (a purine base linked to a deoxyribose or ribose sugar) esterified with a phosphate group at either the 3' or 5'-hydroxyl group of the sugar." [GOC:go_curators, ISBN:0198506732]	385	2557	73	21118	0.0285491	0.18961	query_1	['GO:0009117', 'GO:0072521']
659	GO:BP	GO:0048255	mRNA stabilization	0.154938	FALSE	"Prevention of degradation of mRNA molecules. In the absence of compensating changes in other processes, the slowing of mRNA degradation can result in an overall increase in the population of active mRNA molecules." [GOC:jid]	51	2557	17	21118	0.00664842	0.333333	query_1	['GO:0043488', 'GO:0043489', 'GO:1902373']
660	GO:BP	GO:0070887	cellular response to chemical stimulus	0.156174	FALSE	"Any process that results in a change in state or activity of a cell (in terms of movement, secretion, enzyme production, gene expression, etc.) as a result of a chemical stimulus." [GOC:mah]	3097	2557	441	21118	0.172468	0.142396	query_1	['GO:0042221', 'GO:0051716']
661	GO:BP	GO:0050772	positive regulation of axonogenesis	0.157093	FALSE	"Any process that activates or increases the frequency, rate or extent of axonogenesis." [GOC:ai]	97	2557	26	21118	0.0101682	0.268041	query_1	['GO:0007409', 'GO:0031346', 'GO:0050769', 'GO:0050770']
662	GO:BP	GO:0010975	regulation of neuron projection development	0.160807	FALSE	"Any process that modulates the rate, frequency or extent of neuron projection development. Neuron projection development is the process whose specific outcome is the progression of a neuron projection over time, from its formation to the mature structure. A neuron projection is any process extending from a neural cell, such as axons or dendrites (collectively called neurites)." [GOC:dph, GOC:tb]	526	2557	94	21118	0.0367618	0.178707	query_1	['GO:0031175', 'GO:0120035']
663	GO:BP	GO:0198738	cell-cell signaling by wnt	0.162387	FALSE	"Any process that mediates the transfer of information from one cell to another, medaited by a wnt family protein ligand. This process includes wnt signal transduction in the receiving cell, release of wnt ligand from a secreting cell as well as any processes that actively facilitate wnt transport and presentation to receptor on the recieving cell." [GOC:dos]	412	2557	77	21118	0.0301134	0.186893	query_1	['GO:0007267']
664	GO:BP	GO:0046599	regulation of centriole replication	0.164967	FALSE	"Any process that modulates the frequency, rate or extent of the formation of a daughter centriole of an existing centriole." [GOC:ai]	21	2557	10	21118	0.00391083	0.47619	query_1	['GO:0007099', 'GO:0010824', 'GO:1902115']
665	GO:BP	GO:0044774	mitotic DNA integrity checkpoint signaling	0.16837	FALSE	"A signaling process that controls cell cycle progression in response to changes in DNA structure by monitoring the integrity of the DNA during mitosis. The DNA integrity checkpoint begins with detection of DNA damage, defects in DNA structure or DNA replication, and ends with signal transduction." [GOC:mtg_cell_cycle]	61	2557	19	21118	0.00743058	0.311475	query_1	['GO:0007093', 'GO:0031570']
666	GO:BP	GO:1901698	response to nitrogen compound	0.168419	FALSE	"Any process that results in a change in state or activity of a cell or an organism (in terms of movement, secretion, enzyme production, gene expression, etc.) as a result of a nitrogen compound stimulus." [GOC:pr, GOC:TermGenie]	1199	2557	189	21118	0.0739147	0.157631	query_1	['GO:0042221']
667	GO:BP	GO:0009653	anatomical structure morphogenesis	0.169886	FALSE	"The process in which anatomical structures are generated and organized. Morphogenesis pertains to the creation of form." [GOC:go_curators, ISBN:0521436125]	2715	2557	391	21118	0.152914	0.144015	query_1	['GO:0032502', 'GO:0048856']
668	GO:BP	GO:0070198	protein localization to chromosome, telomeric region	0.17162	FALSE	"Any process in which a protein is transported to, or maintained at, the telomeric region of a chromosome." [GOC:BHF, GOC:mah]	29	2557	12	21118	0.004693	0.413793	query_1	['GO:0034502']
669	GO:BP	GO:0070979	protein K11-linked ubiquitination	0.17162	FALSE	"A protein ubiquitination process in which ubiquitin monomers are attached to a protein, and then ubiquitin polymers are formed by linkages between lysine residues at position 11 of the ubiquitin monomers. K11-linked polyubiquitination targets the substrate protein for degradation. The anaphase-promoting complex promotes the degradation of mitotic regulators by assembling K11-linked polyubiquitin…	29	2557	12	21118	0.004693	0.413793	query_1	['GO:0000209']
670	GO:BP	GO:0009719	response to endogenous stimulus	0.171858	FALSE	"Any process that results in a change in state or activity of a cell or an organism (in terms of movement, secretion, enzyme production, gene expression, etc.) as a result of a stimulus arising within the organism." [GOC:sm]	1619	2557	246	21118	0.0962065	0.151946	query_1	['GO:0050896']
671	GO:BP	GO:0034629	cellular protein-containing complex localization	0.175614	FALSE	"A protein complex localization process that takes place at the cellular level; as a result, a protein complex is transported to, or maintained in, a specific location within a cell." [GOC:mah]	25	2557	11	21118	0.00430192	0.44	query_1	['GO:0031503', 'GO:0034613']
672	GO:BP	GO:0090235	regulation of metaphase plate congression	0.176391	FALSE	"Any process that modulates the rate, frequency, or extent of metaphase plate congression, the alignment of chromosomes at the metaphase plate, a plane halfway between the poles of the spindle." [GOC:ascb_2009, GOC:dph, GOC:tb]	8	2557	6	21118	0.0023465	0.75	query_1	['GO:0010564', 'GO:0051310', 'GO:0060341']
673	GO:BP	GO:0051231	spindle elongation	0.176391	FALSE	"The cell cycle process in which the distance is lengthened between poles of the spindle." [GOC:ai]	8	2557	6	21118	0.0023465	0.75	query_1	['GO:0007017', 'GO:0007051', 'GO:0022402', 'GO:0098813']
674	GO:BP	GO:0046602	regulation of mitotic centrosome separation	0.176391	FALSE	"Any process that modulates the frequency, rate or extent of the separation of duplicated centrosome components at the beginning of mitosis." [GOC:ai]	8	2557	6	21118	0.0023465	0.75	query_1	['GO:0007100', 'GO:0010564']
675	GO:BP	GO:0045936	negative regulation of phosphate metabolic process	0.185853	FALSE	"Any process that stops, prevents, or reduces the frequency, rate or extent of the chemical reactions and pathways involving phosphates." [GOC:go_curators]	528	2557	94	21118	0.0367618	0.17803	query_1	['GO:0006796', 'GO:0010563', 'GO:0019220']
676	GO:BP	GO:0010563	negative regulation of phosphorus metabolic process	0.185853	FALSE	"Any process that decreases the frequency, rate or extent of the chemical reactions and pathways involving phosphorus or compounds containing phosphorus." [GOC:dph, GOC:tb]	528	2557	94	21118	0.0367618	0.17803	query_1	['GO:0006793', 'GO:0031324', 'GO:0051174']
677	GO:BP	GO:0010972	negative regulation of G2/M transition of mitotic cell cycle	0.189998	FALSE	"Any signalling pathway that decreases or inhibits the activity of a cell cycle cyclin-dependent protein kinase to modulate the switch from G2 phase to M phase of the mitotic cell cycle." [GOC:mtg_cell_cycle]	47	2557	16	21118	0.00625733	0.340426	query_1	['GO:0000086', 'GO:0010389', 'GO:1901991', 'GO:1902750']
678	GO:BP	GO:0035295	tube development	0.198412	FALSE	"The process whose specific outcome is the progression of a tube over time, from its initial formation to a mature structure. Epithelial and endothelial tubes transport gases, liquids and cells from one site to another and form the basic structure of many organs and tissues including lung and trachea, kidney, the mammary gland, the vascular system and the gastrointestinal and urinary-genital trac…	1137	2557	180	21118	0.070395	0.158311	query_1	['GO:0007275', 'GO:0048856']
679	GO:BP	GO:0031060	regulation of histone methylation	0.201038	FALSE	"Any process that modulates the frequency, rate or extent of the covalent addition of methyl groups to histones." [GOC:mah]	77	2557	22	21118	0.00860383	0.285714	query_1	['GO:0016571', 'GO:0031056']
680	GO:BP	GO:0050767	regulation of neurogenesis	0.213565	FALSE	"Any process that modulates the frequency, rate or extent of neurogenesis, the generation of cells in the nervous system." [GOC:ai]	422	2557	78	21118	0.0305045	0.184834	query_1	['GO:0022008', 'GO:0048699', 'GO:0051960', 'GO:0060284']
681	GO:BP	GO:0051261	protein depolymerization	0.217909	FALSE	"The process in which protein polymers, compounds composed of a large number of component monomers, are broken down. Depolymerization occurs by the successive removal of monomers from an existing poly- or oligomeric protein." [GOC:ai]	121	2557	30	21118	0.0117325	0.247934	query_1	['GO:0043624']
682	GO:BP	GO:0009259	ribonucleotide metabolic process	0.220733	FALSE	"The chemical reactions and pathways involving a ribonucleotide, a compound consisting of ribonucleoside (a base linked to a ribose sugar) esterified with a phosphate group at either the 3' or 5'-hydroxyl group of the sugar." [GOC:go_curators, ISBN:0198506732]	376	2557	71	21118	0.0277669	0.18883	query_1	['GO:0009117', 'GO:0019693']
683	GO:BP	GO:0016571	histone methylation	0.22514	FALSE	"The modification of histones by addition of methyl groups." [GOC:ai]	150	2557	35	21118	0.0136879	0.233333	query_1	['GO:0006479', 'GO:0016570']
684	GO:BP	GO:0071985	multivesicular body sorting pathway	0.228501	FALSE	"A vesicle-mediated transport process in which transmembrane proteins are ubiquitylated to facilitate their entry into luminal vesicles of multivesicular bodies (MVBs); upon subsequent fusion of MVBs with lysosomes or vacuoles, the cargo proteins are degraded." [GOC:mah, PMID:17603537]	34	2557	13	21118	0.00508408	0.382353	query_1	['GO:0016192']
685	GO:BP	GO:1901976	regulation of cell cycle checkpoint	0.228501	FALSE	"Any process that modulates the frequency, rate or extent of cell cycle checkpoint." [GOC:mtg_cell_cycle, GOC:TermGenie, PMID:23028116]	34	2557	13	21118	0.00508408	0.382353	query_1	['GO:0000075', 'GO:1901987', 'GO:1902531']
686	GO:BP	GO:0032990	cell part morphogenesis	0.230498	FALSE	"The process in which the anatomical structures of a cell part are generated and organized." [GOC:mah]	704	2557	119	21118	0.0465389	0.169034	query_1	['GO:0032989']
687	GO:BP	GO:0031346	positive regulation of cell projection organization	0.244199	FALSE	"Any process that activates or increases the frequency, rate or extent of the process involved in the formation, arrangement of constituent parts, or disassembly of cell projections." [GOC:mah]	417	2557	77	21118	0.0301134	0.184652	query_1	['GO:0030030', 'GO:0031344', 'GO:0051130']
688	GO:BP	GO:0008154	actin polymerization or depolymerization	0.246373	FALSE	"Assembly or disassembly of actin filaments by the addition or removal of actin monomers from a filament." [GOC:mah]	217	2557	46	21118	0.0179898	0.211982	query_1	['GO:0007015']
689	GO:BP	GO:0051781	positive regulation of cell division	0.248342	FALSE	"Any process that activates or increases the frequency, rate or extent of cell division." [GOC:ai]	78	2557	22	21118	0.00860383	0.282051	query_1	['GO:0048522', 'GO:0051301', 'GO:0051302']
690	GO:BP	GO:0032509	endosome transport via multivesicular body sorting pathway	0.254631	FALSE	"The directed movement of substances from endosomes to lysosomes or vacuoles by a pathway in which molecules are sorted into multivesicular bodies, which then fuse with the target compartment." [GOC:mah, PMID:12461556, PMID:16689637]	30	2557	12	21118	0.004693	0.4	query_1	['GO:0016197', 'GO:0071985']
691	GO:BP	GO:0009150	purine ribonucleotide metabolic process	0.256284	FALSE	"The chemical reactions and pathways involving a purine ribonucleotide, a compound consisting of ribonucleoside (a purine base linked to a ribose sugar) esterified with a phosphate group at either the 3' or 5'-hydroxyl group of the sugar." [GOC:go_curators, ISBN:0198506732]	358	2557	68	21118	0.0265937	0.189944	query_1	['GO:0006163', 'GO:0009259']
692	GO:BP	GO:1902117	positive regulation of organelle assembly	0.259977	FALSE	"Any process that activates or increases the frequency, rate or extent of organelle assembly." [GOC:pr, GOC:TermGenie]	73	2557	21	21118	0.00821275	0.287671	query_1	['GO:0010638', 'GO:0044089', 'GO:0070925', 'GO:1902115']
693	GO:BP	GO:0007292	female gamete generation	0.263311	FALSE	"Generation of the female gamete; specialised haploid cells produced by meiosis and along with a male gamete takes part in sexual reproduction." [GOC:dph, ISBN:0198506732]	157	2557	36	21118	0.014079	0.229299	query_1	['GO:0007276']
694	GO:BP	GO:0097659	nucleic acid-templated transcription	0.26391	FALSE	"The cellular synthesis of RNA on a template of nucleic acid (DNA or RNA)." [GOC:pr, GOC:txnOH, GOC:vw]	3534	2557	495	21118	0.193586	0.140068	query_1	['GO:0032774']
695	GO:BP	GO:0000902	cell morphogenesis	0.26559	FALSE	"The developmental process in which the size or shape of a cell is generated and organized." [GOC:clt, GOC:dph, GOC:go_curators, GOC:tb]	1056	2557	168	21118	0.065702	0.159091	query_1	['GO:0009653']
696	GO:BP	GO:0048646	anatomical structure formation involved in morphogenesis	0.265781	FALSE	"The developmental process pertaining to the initial formation of an anatomical structure from unspecified parts. This process begins with the specific processes that contribute to the appearance of the discrete structure and ends when the structural rudiment is recognizable. An anatomical structure is any biological entity that occupies space and is distinguished from its surroundings. Anatomica…	1165	2557	183	21118	0.0715682	0.157082	query_1	['GO:0009653', 'GO:0032502']
697	GO:BP	GO:0000077	DNA damage checkpoint signaling	0.267208	FALSE	"A signal transduction process that contributes to a DNA damage checkpoint." [GOC:mah]	89	2557	24	21118	0.009386	0.269663	query_1	['GO:0031570', 'GO:0042770']
698	GO:BP	GO:0010811	positive regulation of cell-substrate adhesion	0.268047	FALSE	"Any process that increases the frequency, rate or extent of cell-substrate adhesion. Cell-substrate adhesion is the attachment of a cell to the underlying substrate via adhesion molecules." [GOC:dph, GOC:pf, GOC:tb]	128	2557	31	21118	0.0121236	0.242188	query_1	['GO:0010810', 'GO:0031589', 'GO:0045785']
699	GO:BP	GO:0090169	regulation of spindle assembly	0.271176	FALSE	"Any process that modulates the rate, frequency or extent of spindle assembly. Spindle assembly is the aggregation, arrangement and bonding together of a set of components to form the spindle, the array of microtubules and associated molecules that serves to move duplicated chromosomes apart." [GOC:ascb_2009, GOC:dph, GOC:tb]	26	2557	11	21118	0.00430192	0.423077	query_1	['GO:0051225', 'GO:0090224', 'GO:1902115']
700	GO:BP	GO:0043388	positive regulation of DNA binding	0.273729	FALSE	"Any process that increases the frequency, rate or extent of DNA binding. DNA binding is any process in which a gene product interacts selectively with DNA (deoxyribonucleic acid)." [GOC:dph, GOC:jl, GOC:tb]	58	2557	18	21118	0.0070395	0.310345	query_1	['GO:0051099', 'GO:0051101']
701	GO:BP	GO:1904591	positive regulation of protein import	0.273729	FALSE	"Any process that activates or increases the frequency, rate or extent of protein import." [GO_REF:0000058, GOC:TermGenie, PMID:11406629]	58	2557	18	21118	0.0070395	0.310345	query_1	['GO:0017038', 'GO:0051222', 'GO:1904589']
702	GO:BP	GO:0009888	tissue development	0.273758	FALSE	"The process whose specific outcome is the progression of a tissue over time, from its formation to the mature structure." [ISBN:0471245208]	1923	2557	285	21118	0.111459	0.148206	query_1	['GO:0048856']
703	GO:BP	GO:0030330	DNA damage response, signal transduction by p53 class mediator	0.273808	FALSE	"A cascade of processes induced by the cell cycle regulator phosphoprotein p53, or an equivalent protein, in response to the detection of DNA damage." [GOC:go_curators]	63	2557	19	21118	0.00743058	0.301587	query_1	['GO:0042770', 'GO:0072331']
704	GO:BP	GO:0060249	anatomical structure homeostasis	0.28641	FALSE	"A homeostatic process involved in the maintenance of an internal steady state within a defined anatomical structure of an organism, including control of cellular proliferation and death and control of metabolic function. An anatomical structure is any biological entity that occupies space and is distinguished from its surroundings. Anatomical structures can be macroscopic such as a carpel, or mi…	419	2557	77	21118	0.0301134	0.183771	query_1	['GO:0042592']
705	GO:BP	GO:0000079	regulation of cyclin-dependent protein serine/threonine kinase activity	0.286724	FALSE	"Any process that modulates the frequency, rate or extent of cyclin-dependent protein serine/threonine kinase activity." [GOC:go_curators, GOC:pr]	84	2557	23	21118	0.00899492	0.27381	query_1	['GO:0071900', 'GO:1904029']
706	GO:BP	GO:0007507	heart development	0.289292	FALSE	"The process whose specific outcome is the progression of the heart over time, from its formation to the mature structure. The heart is a hollow, muscular organ, which, by contracting rhythmically, keeps up the circulation of the blood." [GOC:jid, UBERON:0000948]	617	2557	106	21118	0.0414548	0.171799	query_1	['GO:0048513', 'GO:0072359']
707	GO:BP	GO:0006351	transcription, DNA-templated	0.309598	FALSE	"The cellular synthesis of RNA on a template of DNA." [GOC:jl, GOC:txnOH]	3532	2557	494	21118	0.193195	0.139864	query_1	['GO:0010467', 'GO:0034645', 'GO:0097659']
708	GO:BP	GO:0046824	positive regulation of nucleocytoplasmic transport	0.322021	FALSE	"Any process that activates or increases the frequency, rate or extent of the directed movement of substances between the nucleus and the cytoplasm." [GOC:bf]	74	2557	21	21118	0.00821275	0.283784	query_1	['GO:0006913', 'GO:0032388', 'GO:0046822']
709	GO:BP	GO:0061842	microtubule organizing center localization	0.323441	FALSE	"Any process in which the microtubule organizing center is transported to, and/or maintained in, a specific location within the cell." [PMID:21281821]	35	2557	13	21118	0.00508408	0.371429	query_1	['GO:0009987', 'GO:0051179']
710	GO:BP	GO:0070897	transcription preinitiation complex assembly	0.323441	FALSE	"The aggregation, arrangement and bonding together of proteins on promoter DNA to form the transcriptional preinitiation complex (PIC), required for transcription." [GOC:jp, GOC:txnOH]	35	2557	13	21118	0.00508408	0.371429	query_1	['GO:0006352', 'GO:0065004']
711	GO:BP	GO:0051668	localization within membrane	0.332134	FALSE	"Any process in which a substance or cellular entity, such as a protein complex or organelle, is transported to, and/or maintained in, a specific location within a membrane." [GOC:ai]	654	2557	111	21118	0.0434102	0.169725	query_1	['GO:0051641']
712	GO:BP	GO:0048313	Golgi inheritance	0.333743	FALSE	"The partitioning of Golgi apparatus between daughter cells at cell division." [GOC:jid, PMID:12851069]	15	2557	8	21118	0.00312867	0.533333	query_1	['GO:0007030', 'GO:0048308']
713	GO:BP	GO:0048308	organelle inheritance	0.333743	FALSE	"The partitioning of organelles between daughter cells at cell division." [GOC:jid]	15	2557	8	21118	0.00312867	0.533333	query_1	['GO:0006996']
714	GO:BP	GO:0043248	proteasome assembly	0.333743	FALSE	"The aggregation, arrangement and bonding together of a mature, active proteasome complex." [GOC:go_curators, PMID:10872471]	15	2557	8	21118	0.00312867	0.533333	query_1	['GO:0034622']
715	GO:BP	GO:0019081	viral translation	0.333743	FALSE	"A process by which viral mRNA is translated into viral protein, using the host cellular machinery." [GOC:bf, GOC:jl, ISBN:0781702534]	15	2557	8	21118	0.00312867	0.533333	query_1	['GO:0016032', 'GO:0019080']
716	GO:BP	GO:0051972	regulation of telomerase activity	0.334039	FALSE	"Any process that modulates the frequency, rate or extent of telomerase activity, the catalysis of the reaction: deoxynucleoside triphosphate + DNA(n) = diphosphate + DNA(n+1). Telomerases catalyze extension of the 3'- end of a DNA strand by one deoxynucleotide at a time using an internal RNA template that encodes the telomeric repeat sequence." [EC:2.-.-.-, GOC:ai]	49	2557	16	21118	0.00625733	0.326531	query_1	['GO:0051338', 'GO:2000278']
717	GO:BP	GO:1902750	negative regulation of cell cycle G2/M phase transition	0.334039	FALSE	"Any signalling pathway that decreases or inhibits the activity of a cell cycle cyclin-dependent protein kinase to modulate the switch from G2 phase to M phase of the cell cycle." [GO_REF:0000058, GOC:jl, GOC:TermGenie]	49	2557	16	21118	0.00625733	0.326531	query_1	['GO:0044839', 'GO:1901988', 'GO:1902749']
718	GO:BP	GO:0016032	viral process	0.339986	FALSE	"A multi-organism process in which a virus is a participant. The other participant is the host. Includes infection of a host cell, replication of the viral genome, and assembly of progeny virus particles. In some cases the viral genetic material may integrate into the host genome and only subsequently, under particular circumstances, 'complete' its life cycle." [GOC:bf, GOC:jl, GOC:mah]	335	2557	64	21118	0.0250293	0.191045	query_1	['GO:0008150']
719	GO:BP	GO:0010970	transport along microtubule	0.342537	FALSE	"The movement of organelles or other particles from one location in the cell to another along microtubules, driven by motor activity." [GOC:dph, GOC:mah, GOC:tb]	153	2557	35	21118	0.0136879	0.228758	query_1	['GO:0030705', 'GO:0099111']
720	GO:BP	GO:0006611	protein export from nucleus	0.345653	FALSE	"The directed movement of a protein from the nucleus into the cytoplasm." [GOC:jl]	64	2557	19	21118	0.00743058	0.296875	query_1	['GO:0006886', 'GO:0051168']
721	GO:BP	GO:0006354	DNA-templated transcription, elongation	0.345653	FALSE	"The extension of an RNA molecule after transcription initiation and promoter clearance at a DNA-dependent RNA polymerase promoter by the addition of ribonucleotides catalyzed by an RNA polymerase." [GOC:mah, GOC:txnOH, PMID:15020047, PMID:18280161]	64	2557	19	21118	0.00743058	0.296875	query_1	['GO:0006351', 'GO:0032774']
722	GO:BP	GO:0051155	positive regulation of striated muscle cell differentiation	0.345653	FALSE	"Any process that activates or increases the frequency, rate or extent of striated muscle cell differentiation." [CL:0000737, GOC:ai]	64	2557	19	21118	0.00743058	0.296875	query_1	['GO:0051146', 'GO:0051149', 'GO:0051153']
723	GO:BP	GO:0009221	pyrimidine deoxyribonucleotide biosynthetic process	0.349847	FALSE	"The chemical reactions and pathways resulting in the formation of a pyrimidine deoxyribonucleotide, a compound consisting of nucleoside (a pyrimidine base linked to a deoxyribose sugar) esterified with a phosphate group at either the 3' or 5'-hydroxyl group of the sugar." [GOC:go_curators, ISBN:0198506732]	6	2557	5	21118	0.00195542	0.833333	query_1	['GO:0006221', 'GO:0009219', 'GO:0009265']
724	GO:BP	GO:0051256	mitotic spindle midzone assembly	0.349847	FALSE	"The cell cycle process in which the aggregation, arrangement and bonding together of a set of components forms the spindle midzone." [GOC:mtg_cell_cycle, GOC:vw, PMID:24239120]	6	2557	5	21118	0.00195542	0.833333	query_1	['GO:0000022', 'GO:0051255', 'GO:0090307', 'GO:1903047']
725	GO:BP	GO:0051305	chromosome movement towards spindle pole	0.349847	FALSE	"The directed movement of chromosomes in the center of the spindle towards the spindle poles, mediated by the shortening of microtubules attached to the chromosomes." [GOC:ai]	6	2557	5	21118	0.00195542	0.833333	query_1	['GO:0007018', 'GO:0022402', 'GO:0051303', 'GO:0098813']
726	GO:BP	GO:0031536	positive regulation of exit from mitosis	0.349847	FALSE	"Any process that activates or increases the rate of progression from anaphase/telophase (high mitotic CDK activity) to G1 (low mitotic CDK activity)." [GOC:mah]	6	2557	5	21118	0.00195542	0.833333	query_1	['GO:0007096', 'GO:0010458', 'GO:1901992']
727	GO:BP	GO:0006269	DNA replication, synthesis of RNA primer	0.349847	FALSE	"The synthesis of a short RNA polymer, usually 4-15 nucleotides long, using one strand of unwound DNA as a template; the RNA then serves as a primer from which DNA polymerases extend synthesis." [PMID:11395402]	6	2557	5	21118	0.00195542	0.833333	query_1	['GO:0006259', 'GO:0006261', 'GO:0032774']
728	GO:BP	GO:0009211	pyrimidine deoxyribonucleoside triphosphate metabolic process	0.349847	FALSE	"The chemical reactions and pathways involving pyrimidine deoxyribonucleoside triphosphate, a compound consisting of a pyrimidine base linked to a deoxyribose sugar esterified with triphosphate on the sugar." [GOC:go_curators, ISBN:0198506732]	6	2557	5	21118	0.00195542	0.833333	query_1	['GO:0009147', 'GO:0009200']
729	GO:BP	GO:0035239	tube morphogenesis	0.367127	FALSE	"The process in which the anatomical structures of a tube are generated and organized. Epithelial and endothelial tubes transport gases, liquids and cells from one site to another and form the basic structure of many organs and tissues, with tube shape and organization varying from the single-celled excretory organ in Caenorhabditis elegans to the branching trees of the mammalian kidney and insec…	911	2557	147	21118	0.0574892	0.161361	query_1	['GO:0009653', 'GO:0035295']
730	GO:BP	GO:0051650	establishment of vesicle localization	0.388436	FALSE	"The directed movement of a vesicle to a specific location." [GOC:ai]	148	2557	34	21118	0.0132968	0.22973	query_1	['GO:0051648', 'GO:0051649', 'GO:0051656']
731	GO:BP	GO:0051962	positive regulation of nervous system development	0.389749	FALSE	"Any process that activates, maintains or increases the frequency, rate or extent of nervous system development, the origin and formation of nervous tissue." [GOC:ai]	330	2557	63	21118	0.0246382	0.190909	query_1	['GO:0007399', 'GO:0051094', 'GO:0051240', 'GO:0051960']
732	GO:BP	GO:0051170	import into nucleus	0.393828	FALSE	"The directed movement of substances into the nucleus." [GOC:ai]	172	2557	38	21118	0.0148612	0.22093	query_1	['GO:0006913']
733	GO:BP	GO:0072332	intrinsic apoptotic signaling pathway by p53 class mediator	0.396797	FALSE	"A series of molecular signals in which an intracellular signal is conveyed to trigger the apoptotic death of a cell. The pathway is induced by the cell cycle regulator phosphoprotein p53, or an equivalent protein, and ends when the execution phase of apoptosis is triggered." [GOC:mah, GOC:mtg_apoptosis]	75	2557	21	21118	0.00821275	0.28	query_1	['GO:0072331', 'GO:0097193']
734	GO:BP	GO:0045859	regulation of protein kinase activity	0.411965	FALSE	"Any process that modulates the frequency, rate or extent of protein kinase activity." [GOC:go_curators]	742	2557	123	21118	0.0481032	0.165768	query_1	['GO:0001932', 'GO:0043549']
735	GO:BP	GO:2000756	regulation of peptidyl-lysine acetylation	0.417331	FALSE	"Any process that modulates the frequency, rate or extent of peptidyl-lysine acetylation." [GOC:obol]	70	2557	20	21118	0.00782167	0.285714	query_1	['GO:0018394', 'GO:1901983']
736	GO:BP	GO:0097549	chromatin organization involved in negative regulation of transcription	0.421711	FALSE	"Any process that stops, prevents, or reduces the frequency, rate or extent of transcription by chromatin organization." [GOC:di, PMID:23123093]	131	2557	31	21118	0.0121236	0.236641	query_1	['GO:0034401', 'GO:0045892']
737	GO:BP	GO:0051123	RNA polymerase II preinitiation complex assembly	0.425432	FALSE	"The aggregation, arrangement and bonding together of proteins on an RNA polymerase II promoter DNA to form the transcriptional preinitiation complex (PIC), the formation of which is a prerequisite for transcription by RNA polymerase." [GOC:txnOH, PMID:10882737, PMID:15020047]	23	2557	10	21118	0.00391083	0.434783	query_1	['GO:0006367', 'GO:0070897']
738	GO:BP	GO:2001243	negative regulation of intrinsic apoptotic signaling pathway	0.42599	FALSE	"Any process that stops, prevents or reduces the frequency, rate or extent of intrinsic apoptotic signaling pathway." [GOC:mtg_apoptosis]	97	2557	25	21118	0.00977708	0.257732	query_1	['GO:0097193', 'GO:1902532', 'GO:2001234', 'GO:2001242']
739	GO:BP	GO:0000491	small nucleolar ribonucleoprotein complex assembly	0.430002	FALSE	"The aggregation, arrangement and bonding together of proteins and a snoRNA to form a small nucleolar ribonucleoprotein (snoRNP) complex." [GOC:krc]	12	2557	7	21118	0.00273758	0.583333	query_1	['GO:0022618']
740	GO:BP	GO:0010826	negative regulation of centrosome duplication	0.430002	FALSE	"Any process that decreases the frequency, rate or extent of centrosome duplication. Centrosome duplication is the replication of a centrosome, a structure comprised of a pair of centrioles and peri-centriolar material from which a microtubule spindle apparatus is organized." [GOC:dph, GOC:tb]	12	2557	7	21118	0.00273758	0.583333	query_1	['GO:0010824', 'GO:0046606', 'GO:0051298']
741	GO:BP	GO:0046606	negative regulation of centrosome cycle	0.430002	FALSE	"Any process that stops, prevents, or reduces the frequency, rate or extent of the centrosome cycle." [GOC:ai]	12	2557	7	21118	0.00273758	0.583333	query_1	['GO:0007098', 'GO:0010948', 'GO:0046605', 'GO:0051494']
742	GO:BP	GO:0043966	histone H3 acetylation	0.433562	FALSE	"The modification of histone H3 by the addition of an acetyl group." [GOC:jl]	65	2557	19	21118	0.00743058	0.292308	query_1	['GO:0016573']
743	GO:BP	GO:0065002	intracellular protein transmembrane transport	0.445423	FALSE	"The directed movement of proteins in a cell, from one side of a membrane to another by means of some agent such as a transporter or pore." [GOC:isa_complete]	55	2557	17	21118	0.00664842	0.309091	query_1	['GO:0006886', 'GO:0071806']
744	GO:BP	GO:0006606	protein import into nucleus	0.44917	FALSE	"The directed movement of a protein from the cytoplasm to the nucleus." [GOC:jl]	167	2557	37	21118	0.0144701	0.221557	query_1	['GO:0006886', 'GO:0017038', 'GO:0034504', 'GO:0051170', 'GO:0072594']
745	GO:BP	GO:1901983	regulation of protein acetylation	0.454812	FALSE	"Any process that modulates the frequency, rate or extent of protein acetylation." [GOC:TermGenie, PMID:22117195]	81	2557	22	21118	0.00860383	0.271605	query_1	['GO:0006473', 'GO:0031399']
746	GO:BP	GO:0051053	negative regulation of DNA metabolic process	0.458132	FALSE	"Any process that stops, prevents, or reduces the frequency, rate or extent of the chemical reactions and pathways involving DNA." [GOC:ai]	120	2557	29	21118	0.0113414	0.241667	query_1	['GO:0006259', 'GO:0010605', 'GO:0045934', 'GO:0051052']
747	GO:BP	GO:0042493	response to drug	0.462299	FALSE	"Any process that results in a change in state or activity of a cell or an organism (in terms of movement, secretion, enzyme production, gene expression, etc.) as a result of a drug stimulus. A drug is a substance used in the diagnosis, treatment or prevention of a disease." [GOC:jl]	459	2557	82	21118	0.0320688	0.178649	query_1	['GO:0042221']
748	GO:BP	GO:0003418	growth plate cartilage chondrocyte differentiation	0.474628	FALSE	"The process in which a chondroblast acquires specialized structural and/or functional features of a chondrocyte that will contribute to the growth of a bone. A chondrocyte is a polymorphic cell that forms cartilage." [GOC:ascb_2009, GOC:dph, GOC:tb]	9	2557	6	21118	0.0023465	0.666667	query_1	['GO:0003413', 'GO:0003417']
749	GO:BP	GO:0010628	positive regulation of gene expression	0.487979	FALSE	"Any process that increases the frequency, rate or extent of gene expression. Gene expression is the process in which a gene's coding sequence is converted into a mature gene product or products (proteins or RNA). This includes the production of an RNA transcript as well as any processing to produce a mature RNA product or an mRNA or circRNA (for protein-coding genes) and the translation of that …	1171	2557	182	21118	0.0711772	0.155423	query_1	['GO:0010467', 'GO:0010468', 'GO:0010604']
750	GO:BP	GO:0071495	cellular response to endogenous stimulus	0.488745	FALSE	"Any process that results in a change in state or activity of a cell (in terms of movement, secretion, enzyme production, gene expression, etc.) as a result of a stimulus arising within the organism." [GOC:mah]	1333	2557	204	21118	0.079781	0.153038	query_1	['GO:0009719']
751	GO:BP	GO:0001701	in utero embryonic development	0.493388	FALSE	"The process whose specific outcome is the progression of the embryo in the uterus over time, from formation of the zygote in the oviduct, to birth. An example of this process is found in Mus musculus." [GOC:go_curators, GOC:mtg_sensu]	494	2557	87	21118	0.0340242	0.176113	query_1	['GO:0043009']
752	GO:BP	GO:0045892	negative regulation of transcription, DNA-templated	0.495967	FALSE	"Any process that stops, prevents, or reduces the frequency, rate or extent of cellular DNA-templated transcription." [GOC:go_curators, GOC:txnOH]	1400	2557	213	21118	0.0833007	0.152143	query_1	['GO:0006351', 'GO:0006355', 'GO:1903507', 'GO:2000113']
753	GO:BP	GO:0009124	nucleoside monophosphate biosynthetic process	0.509271	FALSE	"The chemical reactions and pathways resulting in the formation of a nucleoside monophosphate, a compound consisting of a nucleobase linked to a deoxyribose or ribose sugar esterified with phosphate on the sugar." [GOC:go_curators, ISBN:0198506732]	41	2557	14	21118	0.00547517	0.341463	query_1	['GO:0009123', 'GO:1901293']
754	GO:BP	GO:0043044	ATP-dependent chromatin remodeling	0.509271	FALSE	"Dynamic structural changes to eukaryotic chromatin that require energy from the hydrolysis of ATP, ranging from local changes necessary for transcriptional regulation to global changes necessary for chromosome segregation, mediated by ATP-dependent chromatin-remodelling factors." [GOC:jl, PMID:12042764]	41	2557	14	21118	0.00547517	0.341463	query_1	['GO:0006338']
755	GO:BP	GO:0071479	cellular response to ionizing radiation	0.515616	FALSE	"Any process that results in a change in state or activity of a cell (in terms of movement, secretion, enzyme production, gene expression, etc.) as a result of a ionizing radiation stimulus. Ionizing radiation is radiation with sufficient energy to remove electrons from atoms and may arise from spontaneous decay of unstable isotopes, resulting in alpha and beta particles and gamma rays. Ionizing …	71	2557	20	21118	0.00782167	0.28169	query_1	['GO:0010212', 'GO:0071478']
756	GO:BP	GO:1904874	positive regulation of telomerase RNA localization to Cajal body	0.536236	FALSE	"Any process that activates or increases the frequency, rate or extent of telomerase RNA localization to Cajal body." [GO_REF:0000058, GOC:BHF, GOC:BHF_telomere, GOC:nc, GOC:TermGenie, PMID:25467444]	4	2557	4	21118	0.00156433	1	query_1	['GO:0048518', 'GO:0090671', 'GO:1904872']
757	GO:BP	GO:0031508	pericentric heterochromatin assembly	0.536236	FALSE	"The assembly of chromatin located adjacent to the CENP-A rich centromere 'central core' and characterized by the modified histone H3K9me3, into heterochromatin, resulting in the repression of transcription of centromeric DNA." [GOC:mah, PMID:20206496, PMID:22729156]	4	2557	4	21118	0.00156433	1	query_1	['GO:0010629', 'GO:0031055', 'GO:0031507', 'GO:0034508', 'GO:0140462']
758	GO:BP	GO:1905446	regulation of mitochondrial ATP synthesis coupled electron transport	0.536236	FALSE	"Any process that modulates the frequency, rate or extent of mitochondrial ATP synthesis coupled electron transport." [GO_REF:0000058, GOC:bc, GOC:PARL, GOC:TermGenie, PMID:23707074]	4	2557	4	21118	0.00156433	1	query_1	['GO:0042775', 'GO:0043467']
759	GO:BP	GO:0043174	nucleoside salvage	0.536236	FALSE	"Any process which produces a nucleotide, a nucleobase linked to either beta-D-ribofuranose (ribonucleoside) or 2-deoxy-beta-D-ribofuranose (a deoxyribonucleotide), from derivatives of it without de novo synthesis." [GOC:jl]	4	2557	4	21118	0.00156433	1	query_1	['GO:0009163', 'GO:0043094']
760	GO:BP	GO:0006166	purine ribonucleoside salvage	0.536236	FALSE	"Any process which produces a purine nucleoside from derivatives of it, without de novo synthesis." [GOC:jl]	4	2557	4	21118	0.00156433	1	query_1	['GO:0043101', 'GO:0043174', 'GO:0046129']
761	GO:BP	GO:0007057	spindle assembly involved in female meiosis I	0.536236	FALSE	"The aggregation, arrangement and bonding together of a set of components to form the spindle during meiosis I of a meiotic cell cycle in females. An example of this is found in Drosophila melanogaster." [GOC:mah]	4	2557	4	21118	0.00156433	1	query_1	['GO:0007056', 'GO:0007144']
762	GO:BP	GO:0140462	pericentric heterochromatin organization	0.536236	FALSE	"The organization of chromatin into heterochromatin at the pericentric region of a chromosome." [PMID:26744419]	4	2557	4	21118	0.00156433	1	query_1	['GO:0070828']
763	GO:BP	GO:1903507	negative regulation of nucleic acid-templated transcription	0.538016	FALSE	"Any process that stops, prevents or reduces the frequency, rate or extent of nucleic acid-templated transcription." [GO_REF:0000058, GOC:pr, GOC:TermGenie, GOC:txnOH, GOC:vw]	1402	2557	213	21118	0.0833007	0.151926	query_1	['GO:0097659', 'GO:1902679', 'GO:1903506']
764	GO:BP	GO:0051149	positive regulation of muscle cell differentiation	0.551383	FALSE	"Any process that activates or increases the frequency, rate or extent of muscle cell differentiation." [CL:0000187, GOC:ai]	82	2557	22	21118	0.00860383	0.268293	query_1	['GO:0042692', 'GO:0045597', 'GO:0051147']
765	GO:BP	GO:0061136	regulation of proteasomal protein catabolic process	0.55535	FALSE	"Any process that modulates the rate, frequency, or extent of the chemical reactions and pathways resulting in the breakdown of a protein or peptide by hydrolysis of its peptide bonds that is mediated by the proteasome." [GOC:dph, GOC:tb]	187	2557	40	21118	0.0156433	0.213904	query_1	['GO:0010498', 'GO:1903050']
766	GO:BP	GO:1902017	regulation of cilium assembly	0.558877	FALSE	"Any process that modulates the frequency, rate or extent of cilium assembly." [GOC:cilia, GOC:dph, GOC:TermGenie, PMID:17719545]	61	2557	18	21118	0.0070395	0.295082	query_1	['GO:0060271', 'GO:0120032', 'GO:1902115']
767	GO:BP	GO:1902679	negative regulation of RNA biosynthetic process	0.560251	FALSE	"Any process that stops, prevents or reduces the frequency, rate or extent of RNA biosynthetic process." [GO:jl, GO_REF:0000058, GOC:TermGenie]	1403	2557	213	21118	0.0833007	0.151818	query_1	['GO:0010558', 'GO:0031327', 'GO:0032774', 'GO:0051253', 'GO:2001141']
768	GO:BP	GO:0061564	axon development	0.561099	FALSE	"The progression of an axon over time. Covers axonogenesis (de novo generation of an axon) and axon regeneration (regrowth), as well as processes pertaining to the progression of the axon over time (fasciculation and defasciculation)." [GOC:dph, GOC:pg, GOC:pr]	489	2557	86	21118	0.0336332	0.175869	query_1	['GO:0031175']
769	GO:BP	GO:0050770	regulation of axonogenesis	0.572035	FALSE	"Any process that modulates the frequency, rate or extent of axonogenesis, the generation of an axon, the long process of a neuron." [GOC:ai]	175	2557	38	21118	0.0148612	0.217143	query_1	['GO:0007409', 'GO:0010975', 'GO:0022603']
770	GO:BP	GO:0048738	cardiac muscle tissue development	0.572553	FALSE	"The process whose specific outcome is the progression of cardiac muscle over time, from its formation to the mature structure." [GOC:dph, GOC:jid, GOC:lm]	250	2557	50	21118	0.0195542	0.2	query_1	['GO:0007507', 'GO:0014706']
771	GO:BP	GO:0090231	regulation of spindle checkpoint	0.596621	FALSE	"Any process that modulates the rate, frequency, or extent of the spindle checkpoint, a cell cycle checkpoint that delays the metaphase/anaphase transition until the spindle is correctly assembled and oriented, and chromosomes are attached to the spindle." [GOC:ascb_2009, GOC:dph, GOC:tb]	16	2557	8	21118	0.00312867	0.5	query_1	['GO:0031577', 'GO:1901976']
772	GO:BP	GO:0000076	DNA replication checkpoint signaling	0.596621	FALSE	"A signal transduction process that contributes to a DNA replication checkpoint, that prevents the initiation of nuclear division until DNA replication is complete, thereby ensuring that progeny inherit a full complement of the genome." [GOC:curators, GOC:rn, PMID:11728327, PMID:12537518]	16	2557	8	21118	0.00312867	0.5	query_1	['GO:0031570']
773	GO:BP	GO:0090266	regulation of mitotic cell cycle spindle assembly checkpoint	0.596621	FALSE	"Any process that modulates the rate, frequency, or extent of the mitotic cell cycle spindle assembly checkpoint, a cell cycle checkpoint that delays the metaphase/anaphase transition of a mitotic nuclear division until the spindle is correctly assembled and chromosomes are attached to the spindle." [GOC:mtg_cell_cycle]	16	2557	8	21118	0.00312867	0.5	query_1	['GO:0007088', 'GO:0007094', 'GO:0030071', 'GO:0033047', 'GO:1903504']
774	GO:BP	GO:1903504	regulation of mitotic spindle checkpoint	0.596621	FALSE	"Any process that modulates the frequency, rate or extent of mitotic spindle checkpoint." [GO_REF:0000058, GOC:TermGenie, PMID:23442800]	16	2557	8	21118	0.00312867	0.5	query_1	['GO:0007346', 'GO:0071174', 'GO:0090231']
775	GO:BP	GO:0006376	mRNA splice site selection	0.598403	FALSE	"Selection of a splice site by components of the assembling spliceosome." [GOC:krc, ISBN:0879695897]	28	2557	11	21118	0.00430192	0.392857	query_1	['GO:0000245', 'GO:0022618']
776	GO:BP	GO:0060560	developmental growth involved in morphogenesis	0.607816	FALSE	"The increase in size or mass of an anatomical structure that contributes to the structure attaining its shape." [GOC:dph]	257	2557	51	21118	0.0199452	0.198444	query_1	['GO:0009653', 'GO:0048589']
777	GO:BP	GO:1904029	regulation of cyclin-dependent protein kinase activity	0.610859	FALSE	"Any process that modulates the frequency, rate or extent of cyclin-dependent protein kinase activity." [GO_REF:0000059, GOC:als, GOC:TermGenie, PMID:22995177]	88	2557	23	21118	0.00899492	0.261364	query_1	['GO:0045859', 'GO:0051726']
778	GO:BP	GO:0006508	proteolysis	0.619086	FALSE	"The hydrolysis of proteins into smaller polypeptides and/or amino acids by cleavage of their peptide bonds." [GOC:bf, GOC:mah]	1810	2557	267	21118	0.104419	0.147514	query_1	['GO:0019538']
779	GO:BP	GO:0060173	limb development	0.624368	FALSE	"The process whose specific outcome is the progression of a limb over time, from its formation to the mature structure. A limb is an appendage of an animal used for locomotion or grasping. Examples include legs, arms or some types of fin." [GOC:dgh, GOC:dph, PMID:11487378]	188	2557	40	21118	0.0156433	0.212766	query_1	['GO:0048736']
780	GO:BP	GO:0048736	appendage development	0.624368	FALSE	"The process whose specific outcome is the progression of an appendage over time, from its formation to the mature structure. An appendage is an organ or part that is attached to the trunk of an organism, such as a limb or a branch." [GOC:jid, GOC:rc]	188	2557	40	21118	0.0156433	0.212766	query_1	['GO:0007275', 'GO:0048856']
781	GO:BP	GO:0007417	central nervous system development	0.624431	FALSE	"The process whose specific outcome is the progression of the central nervous system over time, from its formation to the mature structure. The central nervous system is the core nervous system that serves an integrating and coordinating function. In vertebrates it consists of the brain and spinal cord. In those invertebrates with a central nervous system it typically consists of a brain, cerebra…	1023	2557	161	21118	0.0629644	0.15738	query_1	['GO:0007399', 'GO:0048731']
782	GO:BP	GO:0062098	regulation of programmed necrotic cell death	0.650451	FALSE	"Any process that modulates the frequency, rate or extent of programmed necrotic cell death." [GOC:aruk, GOC:rph, PMID:27258785]	24	2557	10	21118	0.00391083	0.416667	query_1	['GO:0010939', 'GO:0043067', 'GO:0097300']
783	GO:BP	GO:0098974	postsynaptic actin cytoskeleton organization	0.660285	FALSE	"A process that is carried out at the cellular level which results in the assembly, arrangement of constituent parts, or disassembly of cytoskeletal structures comprising actin filaments and their associated proteins in the postsynaptic actin cytoskeleton." [GOC:dos]	20	2557	9	21118	0.00351975	0.45	query_1	['GO:0030036', 'GO:0099188']
784	GO:BP	GO:0048762	mesenchymal cell differentiation	0.661199	FALSE	"The process in which a relatively unspecialized cell acquires specialized features of a mesenchymal cell. A mesenchymal cell is a loosely associated cell that is part of the connective tissue in an organism. Mesenchymal cells give rise to more mature connective tissue cell types." [GOC:dph, GOC:jid]	226	2557	46	21118	0.0179898	0.20354	query_1	['GO:0030154', 'GO:0060485']
785	GO:BP	GO:0090501	RNA phosphodiester bond hydrolysis	0.665188	FALSE	"The RNA metabolic process in which the phosphodiester bonds between ribonucleotides are cleaved by hydrolysis." [GOC:dph, GOC:tb]	152	2557	34	21118	0.0132968	0.223684	query_1	['GO:0016070', 'GO:0090305']
786	GO:BP	GO:0031333	negative regulation of protein-containing complex assembly	0.665188	FALSE	"Any process that stops, prevents, or reduces the frequency, rate or extent of protein complex assembly." [GOC:mah]	152	2557	34	21118	0.0132968	0.223684	query_1	['GO:0043254', 'GO:0051129', 'GO:0065003']
787	GO:BP	GO:1904589	regulation of protein import	0.665555	FALSE	"Any process that modulates the frequency, rate or extent of protein import." [GO_REF:0000058, GOC:TermGenie, PMID:11406629]	83	2557	22	21118	0.00860383	0.26506	query_1	['GO:0017038', 'GO:0051223']
788	GO:BP	GO:0072657	protein localization to membrane	0.690362	FALSE	"A process in which a protein is transported to, or maintained in, a specific location in a membrane." [GOC:mah]	589	2557	100	21118	0.0391083	0.169779	query_1	['GO:0034613', 'GO:0051668']
789	GO:BP	GO:1903362	regulation of cellular protein catabolic process	0.697897	FALSE	"Any process that modulates the frequency, rate or extent of cellular protein catabolic process." [GO_REF:0000058, GOC:kmv, GOC:obol, GOC:TermGenie, PMID:24785082]	252	2557	50	21118	0.0195542	0.198413	query_1	['GO:0031329', 'GO:0032268', 'GO:0042176', 'GO:0044257']
790	GO:BP	GO:0031398	positive regulation of protein ubiquitination	0.698147	FALSE	"Any process that activates or increases the frequency, rate or extent of the addition of ubiquitin groups to a protein." [GOC:mah]	117	2557	28	21118	0.0109503	0.239316	query_1	['GO:0016567', 'GO:0031396', 'GO:1903322']
791	GO:BP	GO:0042307	positive regulation of protein import into nucleus	0.725555	FALSE	"Any process that activates or increases the frequency, rate or extent of movement of proteins from the cytoplasm into the nucleus." [GOC:jl]	52	2557	16	21118	0.00625733	0.307692	query_1	['GO:0006606', 'GO:0042306', 'GO:0046824', 'GO:0090316', 'GO:1900182', 'GO:1904591']
792	GO:BP	GO:0080134	regulation of response to stress	0.733251	FALSE	"Any process that modulates the frequency, rate or extent of a response to stress. Response to stress is a change in state or activity of a cell or an organism (in terms of movement, secretion, enzyme production, gene expression, etc.) as a result of a disturbance in organismal or cellular homeostasis, usually, but not necessarily, exogenous (e.g. temperature, humidity, ionizing radiation)." [GOC…	1254	2557	192	21118	0.075088	0.15311	query_1	['GO:0006950', 'GO:0048583']
793	GO:BP	GO:0007007	inner mitochondrial membrane organization	0.737432	FALSE	"A process that is carried out at the cellular level which results in the assembly, arrangement of constituent parts, or disassembly of the mitochondrial inner membrane." [GOC:ai, GOC:dph, GOC:jl, GOC:mah]	33	2557	12	21118	0.004693	0.363636	query_1	['GO:0007006']
794	GO:BP	GO:0051494	negative regulation of cytoskeleton organization	0.738871	FALSE	"Any process that stops, prevents, or reduces the frequency, rate or extent of the formation, arrangement of constituent parts, or disassembly of cytoskeletal structures." [GOC:ai]	171	2557	37	21118	0.0144701	0.216374	query_1	['GO:0007010', 'GO:0010639', 'GO:0051493']
795	GO:BP	GO:0006334	nucleosome assembly	0.750861	FALSE	"The aggregation, arrangement and bonding together of a nucleosome, the beadlike structural units of eukaryotic chromatin composed of histones and DNA." [GOC:mah]	106	2557	26	21118	0.0101682	0.245283	query_1	['GO:0031497', 'GO:0034728', 'GO:0065004']
796	GO:BP	GO:0032446	protein modification by small protein conjugation	0.78498	FALSE	"A protein modification process in which one or more groups of a small protein, such as ubiquitin or a ubiquitin-like protein, are covalently attached to a target protein." [GOC:mah]	818	2557	132	21118	0.051623	0.161369	query_1	['GO:0070647']
797	GO:BP	GO:0016567	protein ubiquitination	0.789939	FALSE	"The process in which one or more ubiquitin groups are added to a protein." [GOC:ai]	768	2557	125	21118	0.0488854	0.16276	query_1	['GO:0032446']
798	GO:BP	GO:0071900	regulation of protein serine/threonine kinase activity	0.807866	FALSE	"Any process that modulates the rate, frequency, or extent of protein serine/threonine kinase activity." [GOC:mah]	460	2557	81	21118	0.0316777	0.176087	query_1	['GO:0045859']
799	GO:BP	GO:0019637	organophosphate metabolic process	0.82512	FALSE	"The chemical reactions and pathways involving organophosphates, any phosphate-containing organic compound." [ISBN:0198506732]	891	2557	142	21118	0.0555338	0.159371	query_1	['GO:0006793', 'GO:0071704']
800	GO:BP	GO:0017148	negative regulation of translation	0.833438	FALSE	"Any process that stops, prevents, or reduces the frequency, rate or extent of the chemical reactions and pathways resulting in the formation of proteins by the translation of mRNA or circRNA." [GOC:isa_complete]	172	2557	37	21118	0.0144701	0.215116	query_1	['GO:0006412', 'GO:0006417', 'GO:0010629', 'GO:0032269', 'GO:0034249', 'GO:2000113']
801	GO:BP	GO:0051960	regulation of nervous system development	0.860843	FALSE	"Any process that modulates the frequency, rate or extent of nervous system development, the origin and formation of nervous tissue." [GOC:ai]	516	2557	89	21118	0.0348064	0.172481	query_1	['GO:0007399', 'GO:2000026']
802	GO:BP	GO:0006605	protein targeting	0.89568	FALSE	"The process of targeting specific proteins to particular regions of the cell, typically membrane-bounded subcellular organelles. Usually requires an organelle specific protein sequence motif." [GOC:ma]	274	2557	53	21118	0.0207274	0.193431	query_1	['GO:0006886']
803	GO:BP	GO:0061024	membrane organization	0.898098	FALSE	"A process which results in the assembly, arrangement of constituent parts, or disassembly of a membrane. A membrane is a double layer of lipid molecules that encloses all cells, and, in eukaryotes, many organelles; may be a single or double lipid bilayer; also includes associated proteins." [GOC:dph, GOC:tb]	835	2557	134	21118	0.0524052	0.160479	query_1	['GO:0016043']
804	GO:BP	GO:0030307	positive regulation of cell growth	0.901188	FALSE	"Any process that activates or increases the frequency, rate, extent or direction of cell growth." [GOC:go_curators]	185	2557	39	21118	0.0152522	0.210811	query_1	['GO:0001558', 'GO:0016049', 'GO:0045927', 'GO:0048522']
805	GO:BP	GO:0044773	mitotic DNA damage checkpoint signaling	0.90397	FALSE	"A signal transduction process involved in mitotic DNA damage checkpoint." [GOC:mtg_cell_cycle, GOC:TermGenie]	58	2557	17	21118	0.00664842	0.293103	query_1	['GO:0000077', 'GO:0044774']
806	GO:BP	GO:0032206	positive regulation of telomere maintenance	0.923271	FALSE	"Any process that activates or increases the frequency, rate or extent of a process that affects and monitors the activity of telomeric proteins and the length of telomeric DNA." [GOC:mah]	48	2557	15	21118	0.00586625	0.3125	query_1	['GO:0000723', 'GO:0032204', 'GO:0051054', 'GO:2001252']
807	GO:BP	GO:0045185	maintenance of protein location	0.931851	FALSE	"Any process in which a protein is maintained in a location and prevented from moving elsewhere. These include sequestration, stabilization to prevent transport elsewhere and the active retrieval of proteins that do move away." [GOC:bf]	96	2557	24	21118	0.009386	0.25	query_1	['GO:0008104', 'GO:0051235']
808	GO:BP	GO:0009968	negative regulation of signal transduction	0.940206	FALSE	"Any process that stops, prevents, or reduces the frequency, rate or extent of signal transduction." [GOC:sm]	1223	2557	187	21118	0.0731326	0.152903	query_1	['GO:0007165', 'GO:0009966', 'GO:0010648', 'GO:0023057', 'GO:0048585']
809	GO:BP	GO:0051570	regulation of histone H3-K9 methylation	0.967009	FALSE	"Any process that modulates the frequency, rate or extent of the covalent addition of a methyl group to the lysine at position 9 of histone H3." [GOC:ai]	25	2557	10	21118	0.00391083	0.4	query_1	['GO:0031060', 'GO:0051567']
810	GO:BP	GO:0001824	blastocyst development	0.984445	FALSE	"The process whose specific outcome is the progression of the blastocyst over time, from its formation to the mature structure. The mammalian blastocyst is a hollow ball of cells containing two cell types, the inner cell mass and the trophectoderm." [GOC:dph, ISBN:0124020607, ISBN:0198542771]	143	2557	32	21118	0.0125147	0.223776	query_1	['GO:0001701', 'GO:0048856']
811	GO:BP	GO:0070142	synaptic vesicle budding	1	FALSE	"Evagination of a membrane to form a synaptic vesicle." [GOC:mah]	12	2557	2	21118	0.000782167	0.166667	query_1	['GO:0006900', 'GO:0048489']
812	GO:BP	GO:0070126	mitochondrial translational termination	1	FALSE	"The process resulting in the release of a polypeptide chain from the ribosome in a mitochondrion, usually in response to a termination codon (note that mitochondria use variants of the universal genetic code that differ between different taxa)." [GOC:mah, http://mitogenome.org/index.php/Genetic_Code_of_mitochondria]	3	2557	2	21118	0.000782167	0.666667	query_1	['GO:0006415', 'GO:0032543']
813	GO:BP	GO:0070129	regulation of mitochondrial translation	1	FALSE	"Any process that modulates the frequency, rate or extent of the chemical reactions and pathways resulting in the formation of proteins by the translation of mRNA in a mitochondrion." [GOC:mah]	27	2557	5	21118	0.00195542	0.185185	query_1	['GO:0006417', 'GO:0032543', 'GO:0062125']
814	GO:BP	GO:0070131	positive regulation of mitochondrial translation	1	FALSE	"Any process that activates or increases the frequency, rate or extent of the chemical reactions and pathways resulting in the formation of proteins by the translation of mRNA in a mitochondrion." [GOC:mah]	18	2557	4	21118	0.00156433	0.222222	query_1	['GO:0032543', 'GO:0045727', 'GO:0070129']
815	GO:BP	GO:0070127	tRNA aminoacylation for mitochondrial protein translation	1	FALSE	"The synthesis of aminoacyl tRNA by the formation of an ester bond between the 3'-hydroxyl group of the most 3' adenosine of the tRNA, to be used in ribosome-mediated polypeptide synthesis in a mitochondrion." [GOC:mah]	7	2557	1	21118	0.000391083	0.142857	query_1	['GO:0000959', 'GO:0006418', 'GO:0032543']
816	GO:BP	GO:0070168	negative regulation of biomineral tissue development	1	FALSE	"Any process that stops, prevents, or reduces the frequency, rate or extent of biomineral tissue development, the formation of hard tissues that consist mainly of inorganic compounds." [GOC:mah]	24	2557	2	21118	0.000782167	0.0833333	query_1	['GO:0031214', 'GO:0051093', 'GO:0051241', 'GO:0070167', 'GO:0110150']
817	GO:BP	GO:0070141	response to UV-A	1	FALSE	"Any process that results in a change in state or activity of a cell or an organism (in terms of movement, secretion, enzyme production, gene expression, etc.) as a result of a UV-A radiation stimulus. UV-A radiation (UV-A light) spans the wavelengths 315 to 400 nm." [GOC:BHF, GOC:mah]	15	2557	5	21118	0.00195542	0.333333	query_1	['GO:0009411']
818	GO:BP	GO:0070167	regulation of biomineral tissue development	1	FALSE	"Any process that modulates the frequency, rate or extent of biomineral tissue development, the formation of hard tissues that consist mainly of inorganic compounds." [GOC:mah]	95	2557	15	21118	0.00586625	0.157895	query_1	['GO:0031214', 'GO:0110149', 'GO:2000026']
819	GO:BP	GO:0070150	mitochondrial glycyl-tRNA aminoacylation	1	FALSE	"The process of coupling glycine to glycyl-tRNA in a mitochondrion, catalyzed by glycyl-tRNA synthetase. In tRNA aminoacylation, the amino acid is first activated by linkage to AMP and then transferred to either the 2'- or the 3'-hydroxyl group of the 3'-adenosine residue of the tRNA." [GOC:mah, GOC:mcc]	1	2557	1	21118	0.000391083	1	query_1	['GO:0006426', 'GO:0070127']
820	GO:BP	GO:0050832	defense response to fungus	1	FALSE	"Reactions triggered in response to the presence of a fungus that act to protect the cell or organism." [GOC:ai]	35	2557	5	21118	0.00195542	0.142857	query_1	['GO:0009620', 'GO:0098542']
821	GO:BP	GO:0046887	positive regulation of hormone secretion	1	FALSE	"Any process that activates or increases the frequency, rate or extent of the regulated release of a hormone from a cell." [GOC:ai]	162	2557	23	21118	0.00899492	0.141975	query_1	['GO:0010647', 'GO:0023056', 'GO:0046879', 'GO:0046883', 'GO:1903532']
822	GO:BP	GO:0070050	neuron cellular homeostasis	1	FALSE	"The cellular homeostatic process that preserves a neuron in a stable, differentiated functional and structural state." [GOC:BHF, GOC:mah]	40	2557	8	21118	0.00312867	0.2	query_1	['GO:0019725', 'GO:0060249']
823	GO:BP	GO:0046903	secretion	1	FALSE	"The controlled release of a substance by a cell or a tissue." [GOC:ai]	1034	2557	126	21118	0.0492765	0.121857	query_1	['GO:0006810']
824	GO:BP	GO:0065007	biological regulation	1	FALSE	"Any process that modulates a measurable attribute of any biological process, quality or function." [GOC:dph, GOC:isa_complete, GOC:mah, GOC:pr, GOC:vw]	13374	2557	1650	21118	0.645287	0.123374	query_1	['GO:0008150']
825	GO:BP	GO:0065005	protein-lipid complex assembly	1	FALSE	"The aggregation, arrangement and bonding together of proteins and lipids to form a protein-lipid complex." [GOC:jl]	25	2557	1	21118	0.000391083	0.04	query_1	['GO:0065003', 'GO:0071825']
826	GO:BP	GO:0046916	cellular transition metal ion homeostasis	1	FALSE	"Any process involved in the maintenance of an internal steady state of transition metal ions at the level of a cell. A transition metal is an element whose atom has an incomplete d-subshell of extranuclear electrons, or which gives rise to a cation or cations with an incomplete d-subshell. Transition metals often have more than one valency state. Biologically relevant transition metals include v…	109	2557	11	21118	0.00430192	0.100917	query_1	['GO:0006875', 'GO:0055076']
827	GO:BP	GO:0046928	regulation of neurotransmitter secretion	1	FALSE	"Any process that modulates the frequency, rate or extent of the regulated release of a neurotransmitter from a cell." [GOC:ai]	123	2557	20	21118	0.00782167	0.162602	query_1	['GO:0001505', 'GO:0007269', 'GO:0050804', 'GO:0051588', 'GO:1903530']
828	GO:BP	GO:0046931	pore complex assembly	1	FALSE	"The aggregation, arrangement and bonding together of a set of components to form a pore complex. A pore complex is a small opening in a membrane that allows the passage of liquids and/or gases." [GOC:jl, GOC:mah]	23	2557	9	21118	0.00351975	0.391304	query_1	['GO:0065003']
829	GO:BP	GO:0062237	protein localization to postsynapse	1	FALSE	"Any process in which a protein is transported to, and/or maintained at the postsynapse, the part of a synapse that is part of the post-synaptic cell." [PMID:31189538]	55	2557	9	21118	0.00351975	0.163636	query_1	['GO:0035418']
830	GO:BP	GO:0062208	positive regulation of pattern recognition receptor signaling pathway	1	FALSE	"Any process that decreases the rate, frequency or extent of a pattern recognition receptor signaling pathway." [PMID:30610168]	40	2557	6	21118	0.0023465	0.15	query_1	['GO:0002221', 'GO:0009967', 'GO:0062207']
831	GO:BP	GO:0046939	nucleotide phosphorylation	1	FALSE	"The process of introducing one or more phosphate groups into a nucleotide to produce a phosphorylated nucleoside." [GOC:ai]	111	2557	19	21118	0.00743058	0.171171	query_1	['GO:0016310']
832	GO:BP	GO:0062207	regulation of pattern recognition receptor signaling pathway	1	FALSE	"Any process that modulates the rate, frequency or extent of a pattern recognition receptor signaling pathway." [PMID:30610168]	92	2557	9	21118	0.00351975	0.0978261	query_1	['GO:0002221', 'GO:0009966']
833	GO:BP	GO:0062197	cellular response to chemical stress	1	FALSE	"Any process that results in a change in state or activity of a cell (in terms of movement, secretion, enzyme production, gene expression, etc.) as a result of a chemical stimulus indicating the organism is under stress." [PMID:26653712]	332	2557	58	21118	0.0226828	0.174699	query_1	['GO:0033554', 'GO:0070887']
834	GO:BP	GO:0062176	R-loop disassembly	1	FALSE	"A DNA metabolic process that results in the disassembly of R-loops. R-loops are three-stranded nucleic acid structures consisitng of an RNA:DNA heteroduplex and a looped-out non-template strand. Aberrant formation and persistence of R-loops block transcription elongation and cause DNA damage. Mechanisms that resolve R-loops are essential for genome stability." [PMID:28790157]	5	2557	3	21118	0.00117325	0.6	query_1	['GO:0006259', 'GO:0006261']
835	GO:BP	GO:0062149	detection of stimulus involved in sensory perception of pain	1	FALSE	"The series of events involved in the perception of pain in which a stimulus is received and converted into a molecular signal." [PMID:19837031]	33	2557	3	21118	0.00117325	0.0909091	query_1	['GO:0019233', 'GO:0050906']
836	GO:BP	GO:0062126	fatty acid primary amide metabolic process	1	FALSE	"The chemical reactions and pathways, including anabolism and catabolism, by which living organisms transform primary fatty amides." [PMID:11128635]	1	2557	1	21118	0.000391083	1	query_1	['GO:0006629', 'GO:0043603', 'GO:1901564', 'GO:1901568']
837	GO:BP	GO:0070059	intrinsic apoptotic signaling pathway in response to endoplasmic reticulum stress	1	FALSE	"A series of molecular signals in which an intracellular signal is conveyed to trigger the apoptotic death of a cell. The pathway is induced in response to a stimulus indicating endoplasmic reticulum (ER) stress, and ends when the execution phase of apoptosis is triggered. ER stress usually results from the accumulation of unfolded or misfolded proteins in the ER lumen." [GOC:mah, GOC:mtg_apoptos…	67	2557	8	21118	0.00312867	0.119403	query_1	['GO:0034976', 'GO:0097193']
838	GO:BP	GO:0070070	proton-transporting V-type ATPase complex assembly	1	FALSE	"The aggregation, arrangement and bonding together of a proton-transporting V-type ATPase complex, proton-transporting two-sector ATPase complex that couples ATP hydrolysis to the transport of protons across a concentration gradient." [GOC:mah]	8	2557	2	21118	0.000782167	0.25	query_1	['GO:0070071']
839	GO:BP	GO:0046902	regulation of mitochondrial membrane permeability	1	FALSE	"Any process that modulates the frequency, rate or extent of the passage or uptake of molecules by the mitochondrial membrane." [GOC:bf]	55	2557	12	21118	0.004693	0.218182	query_1	['GO:0006839', 'GO:0007006', 'GO:0090559']
840	GO:BP	GO:0070071	proton-transporting two-sector ATPase complex assembly	1	FALSE	"The aggregation, arrangement and bonding together of a proton-transporting two-sector ATPase complex, a large protein complex that catalyzes the synthesis or hydrolysis of ATP by a rotational mechanism, coupled to the transport of protons across a membrane." [GOC:mah]	15	2557	3	21118	0.00117325	0.2	query_1	['GO:0034622']
841	GO:BP	GO:0070102	interleukin-6-mediated signaling pathway	1	FALSE	"A series of molecular signals initiated by the binding of interleukin-6 to a receptor on the surface of a cell, and ending with regulation of a downstream cellular process, e.g. transcription." [GOC:add, GOC:BHF, GOC:mah, GOC:signaling]	18	2557	1	21118	0.000391083	0.0555556	query_1	['GO:0019221', 'GO:0071354']
842	GO:BP	GO:0070101	positive regulation of chemokine-mediated signaling pathway	1	FALSE	"Any process that increases the rate, frequency or extent of the series of molecular events generated as a consequence of a chemokine binding to a cell surface receptor." [GOC:mah]	3	2557	1	21118	0.000391083	0.333333	query_1	['GO:0001961', 'GO:0070098', 'GO:0070099']
843	GO:BP	GO:0046888	negative regulation of hormone secretion	1	FALSE	"Any process that stops, prevents, or reduces the frequency, rate or extent of the regulated release of a hormone from a cell." [GOC:ai]	92	2557	10	21118	0.00391083	0.108696	query_1	['GO:0010648', 'GO:0023057', 'GO:0046879', 'GO:0046883', 'GO:1903531']
844	GO:BP	GO:0046889	positive regulation of lipid biosynthetic process	1	FALSE	"Any process that activates or increases the frequency, rate or extent of the chemical reactions and pathways resulting in the formation of lipids." [GOC:ai]	91	2557	12	21118	0.004693	0.131868	query_1	['GO:0008610', 'GO:0009891', 'GO:0045834', 'GO:0046890']
845	GO:BP	GO:0070099	regulation of chemokine-mediated signaling pathway	1	FALSE	"Any process that modulates the rate, frequency or extent of the series of molecular events generated as a consequence of a chemokine binding to a cell surface receptor." [GOC:mah]	10	2557	1	21118	0.000391083	0.1	query_1	['GO:0001959', 'GO:0070098']
846	GO:BP	GO:0070098	chemokine-mediated signaling pathway	1	FALSE	"A series of molecular signals initiated by the binding of a chemokine to a receptor on the surface of a cell, and ending with regulation of a downstream cellular process, e.g. transcription." [GOC:mah, GOC:signaling]	82	2557	3	21118	0.00117325	0.0365854	query_1	['GO:0019221', 'GO:1990869']
847	GO:BP	GO:0046890	regulation of lipid biosynthetic process	1	FALSE	"Any process that modulates the frequency, rate or extent of the chemical reactions and pathways resulting in the formation of lipids." [GOC:ai]	187	2557	24	21118	0.009386	0.128342	query_1	['GO:0008610', 'GO:0009889', 'GO:0019216']
848	GO:BP	GO:0070120	ciliary neurotrophic factor-mediated signaling pathway	1	FALSE	"A series of molecular signals initiated by the binding of a ciliary neurotrophic factor (CNTF) to a receptor on the surface of a cell, and ending with regulation of a downstream cellular process, e.g. transcription." [GOC:BHF, GOC:mah]	5	2557	1	21118	0.000391083	0.2	query_1	['GO:0019221']
849	GO:BP	GO:0046900	tetrahydrofolylpolyglutamate metabolic process	1	FALSE	"The chemical reactions and pathways involving tetrahydrofolylpolyglutamate, a folate derivative comprising tetrahydrofolate attached to a chain of glutamate residues." [GOC:ai]	2	2557	1	21118	0.000391083	0.5	query_1	['GO:0006760']
850	GO:BP	GO:0070092	regulation of glucagon secretion	1	FALSE	"Any process that modulates the frequency, rate or extent of the regulated release of glucagon." [GOC:BHF, GOC:mah]	12	2557	2	21118	0.000782167	0.166667	query_1	['GO:0070091', 'GO:0090276']
851	GO:BP	GO:0070091	glucagon secretion	1	FALSE	"The regulated release of glucagon from secretory granules in the A (alpha) cells of the pancreas (islets of Langerhans)." [GOC:BHF, GOC:rl]	12	2557	2	21118	0.000782167	0.166667	query_1	['GO:0030072']
852	GO:BP	GO:0070086	ubiquitin-dependent endocytosis	1	FALSE	"Endocytosis of a protein that requires the substrate to be modified by ubiquitination. Several plasma membrane proteins, including cell surface permeases and some receptors, are targeted for internalization by endocytosis, and are thereafter delivered to the vacuole or lysosome, where they are degraded." [GOC:jp, GOC:mah, PMID:9409540]	5	2557	2	21118	0.000782167	0.4	query_1	['GO:0006897', 'GO:0015031', 'GO:0072594', 'GO:0098657']
853	GO:BP	GO:0070085	glycosylation	1	FALSE	"The covalent attachment and further modification of carbohydrate residues to a substrate molecule." [GOC:hjd, GOC:mah]	242	2557	28	21118	0.0109503	0.115702	query_1	['GO:0008152']
854	GO:BP	GO:0070084	protein initiator methionine removal	1	FALSE	"The protein modification process in which the translation-initiating methionine or formylmethionine residue is removed from a protein." [GOC:imk, GOC:mah]	3	2557	1	21118	0.000391083	0.333333	query_1	['GO:0006464']
855	GO:BP	GO:0070076	histone lysine demethylation	1	FALSE	"The modification of a histone by the removal of a methyl group from a lysine residue." [GOC:mah]	28	2557	1	21118	0.000391083	0.0357143	query_1	['GO:0016577']
856	GO:BP	GO:0070072	vacuolar proton-transporting V-type ATPase complex assembly	1	FALSE	"The aggregation, arrangement and bonding together of a vacuolar proton-transporting V-type ATPase complex, proton-transporting two-sector ATPase complex that couples ATP hydrolysis to the transport of protons across the vacuolar membrane." [GOC:BHF, GOC:mah]	6	2557	1	21118	0.000391083	0.166667	query_1	['GO:0070070']
857	GO:BP	GO:0070094	positive regulation of glucagon secretion	1	FALSE	"Any process that activates or increases the frequency, rate or extent of the regulated release of glucagon." [GOC:BHF, GOC:mah]	4	2557	1	21118	0.000391083	0.25	query_1	['GO:0070091', 'GO:0070092', 'GO:0090277']
858	GO:BP	GO:0070169	positive regulation of biomineral tissue development	1	FALSE	"Any process that activates or increases the frequency, rate or extent of biomineral tissue development, the formation of hard tissues that consist mainly of inorganic compounds." [GOC:mah]	50	2557	10	21118	0.00391083	0.2	query_1	['GO:0031214', 'GO:0051094', 'GO:0051240', 'GO:0070167', 'GO:0110151']
859	GO:BP	GO:0070255	regulation of mucus secretion	1	FALSE	"Any process that modulates the frequency, rate or extent of the regulated release of mucus from a cell or a tissue." [GOC:add]	13	2557	4	21118	0.00156433	0.307692	query_1	['GO:0050878', 'GO:0051046', 'GO:0051239', 'GO:0070254']
860	GO:BP	GO:0070172	positive regulation of tooth mineralization	1	FALSE	"Any process that activates or increases the frequency, rate or extent of tooth mineralization, the deposition of calcium salts in tooth structures." [GOC:BHF, GOC:mah]	4	2557	1	21118	0.000391083	0.25	query_1	['GO:0034505', 'GO:0070169', 'GO:0070170']
861	GO:BP	GO:0070536	protein K63-linked deubiquitination	1	FALSE	"A protein deubiquitination process in which a K63-linked ubiquitin chain, i.e. a polymer of ubiquitin formed by linkages between lysine residues at position 63 of the ubiquitin monomers, is removed from a protein." [GOC:mah, PMID:19202061, PMID:19214193]	34	2557	7	21118	0.00273758	0.205882	query_1	['GO:0016579']
862	GO:BP	GO:0070535	histone H2A K63-linked ubiquitination	1	FALSE	"A histone ubiquitination process in which a polymer of ubiquitin, formed by linkages between lysine residues at position 63 of the ubiquitin monomers, is added to a lysine residue in histone H2A or the variant H2AX." [GOC:mah, PMID:18430235]	7	2557	1	21118	0.000391083	0.142857	query_1	['GO:0033522', 'GO:0070534']
863	GO:BP	GO:0070534	protein K63-linked ubiquitination	1	FALSE	"A protein ubiquitination process in which a polymer of ubiquitin, formed by linkages between lysine residues at position 63 of the ubiquitin monomers, is added to a protein. K63-linked ubiquitination does not target the substrate protein for degradation, but is involved in several pathways, notably as a signal to promote error-free DNA postreplication repair." [GOC:mah, PMID:15556404]	56	2557	14	21118	0.00547517	0.25	query_1	['GO:0000209']
864	GO:BP	GO:0070528	protein kinase C signaling	1	FALSE	"A series of reactions, mediated by the intracellular serine/threonine kinase protein kinase C, which occurs as a result of a single trigger reaction or compound." [GOC:BHF, GOC:mah]	38	2557	5	21118	0.00195542	0.131579	query_1	['GO:0035556']
865	GO:BP	GO:0046879	hormone secretion	1	FALSE	"The regulated release of hormones, substances with a specific regulatory effect on a particular organ or group of cells." [ISBN:0198506732]	356	2557	50	21118	0.0195542	0.140449	query_1	['GO:0009914', 'GO:0023061']
866	GO:BP	GO:0046880	regulation of follicle-stimulating hormone secretion	1	FALSE	"Any process that modulates the frequency, rate or extent of the regulated release of follicle-stimulating hormone." [GOC:ai]	9	2557	2	21118	0.000782167	0.222222	query_1	['GO:0032276', 'GO:0046884']
867	GO:BP	GO:0070527	platelet aggregation	1	FALSE	"The adhesion of one platelet to one or more other platelets via adhesion molecules." [GOC:BHF, GOC:vk]	51	2557	6	21118	0.0023465	0.117647	query_1	['GO:0030168', 'GO:0034109']
868	GO:BP	GO:0070525	tRNA threonylcarbamoyladenosine metabolic process	1	FALSE	"The chemical reactions and pathways involving tRNA threonylcarbamoyladenosine, a modified nucleoside found in some tRNA molecules." [GOC:imk, GOC:mah, PMID:19287007]	12	2557	2	21118	0.000782167	0.166667	query_1	['GO:0016070']
869	GO:BP	GO:0070512	positive regulation of histone H4-K20 methylation	1	FALSE	"Any process that activates or increases the frequency, rate or extent of the covalent addition of a methyl group to the lysine at position 20 of histone H4." [GOC:mah]	1	2557	1	21118	0.000391083	1	query_1	['GO:0031062', 'GO:0034770', 'GO:0070510']
870	GO:BP	GO:0070510	regulation of histone H4-K20 methylation	1	FALSE	"Any process that modulates the frequency, rate or extent of the covalent addition of a methyl group to the lysine at position 20 of histone H4." [GOC:mah]	1	2557	1	21118	0.000391083	1	query_1	['GO:0031060', 'GO:0034770']
871	GO:BP	GO:0070509	calcium ion import	1	FALSE	"The directed movement of calcium ions into a cell or organelle." [GOC:mah]	87	2557	11	21118	0.00430192	0.126437	query_1	['GO:0006816']
872	GO:BP	GO:0070508	cholesterol import	1	FALSE	"The directed movement of cholesterol into a cell or organelle." [GOC:BHF, GOC:rl]	12	2557	1	21118	0.000391083	0.0833333	query_1	['GO:0030301', 'GO:0035376']
873	GO:BP	GO:0046881	positive regulation of follicle-stimulating hormone secretion	1	FALSE	"Any process that activates or increases the frequency, rate or extent of the regulated release of follicle-stimulating hormone." [GOC:ai]	5	2557	1	21118	0.000391083	0.2	query_1	['GO:0032278', 'GO:0046880', 'GO:0046884']
874	GO:BP	GO:0070500	poly-gamma-glutamate metabolic process	1	FALSE	"The chemical reactions and pathways involving poly-gamma-glutamate, a polymer of D- and/or L-glutamic acid residues linked by gamma-peptidyl bonds." [GOC:mah, PMID:16689787]	1	2557	1	21118	0.000391083	1	query_1	['GO:0044260']
875	GO:BP	GO:0070498	interleukin-1-mediated signaling pathway	1	FALSE	"A series of molecular signals initiated by the binding of interleukin-1 to a receptor on the surface of a cell, and ending with regulation of a downstream cellular process, e.g. transcription." [GOC:BHF, GOC:mah, GOC:signaling]	24	2557	1	21118	0.000391083	0.0416667	query_1	['GO:0019221', 'GO:0071347']
876	GO:BP	GO:0070495	negative regulation of thrombin-activated receptor signaling pathway	1	FALSE	"Any process that stops, prevents, or reduces the frequency, rate or extent of thrombin-activated receptor protein signaling pathway activity. A thrombin receptor signaling pathway is the series of molecular signals generated as a consequence of a thrombin-activated receptor binding to one of its physiological ligands." [GOC:mah]	3	2557	1	21118	0.000391083	0.333333	query_1	['GO:0045744', 'GO:0070493', 'GO:0070494']
877	GO:BP	GO:0070494	regulation of thrombin-activated receptor signaling pathway	1	FALSE	"Any process that modulates the frequency, rate or extent of a thrombin-activated receptor signaling pathway activity. A thrombin receptor signaling pathway is the series of molecular signals generated as a consequence of a thrombin-activated receptor binding to one of its physiological ligands." [GOC:mah]	3	2557	1	21118	0.000391083	0.333333	query_1	['GO:0008277', 'GO:0070493']
878	GO:BP	GO:0070493	thrombin-activated receptor signaling pathway	1	FALSE	"The series of molecular signals generated as a consequence of a thrombin-activated receptor binding to one of its physiological ligands." [GOC:mah, PMID:1672265]	12	2557	1	21118	0.000391083	0.0833333	query_1	['GO:0007186']
879	GO:BP	GO:0046882	negative regulation of follicle-stimulating hormone secretion	1	FALSE	"Any process that stops, prevents, or reduces the frequency, rate or extent of the regulated release of follicle-stimulating hormone." [GOC:ai]	4	2557	2	21118	0.000782167	0.5	query_1	['GO:0032277', 'GO:0046880', 'GO:0046884']
880	GO:BP	GO:0070488	neutrophil aggregation	1	FALSE	"The adhesion of one neutrophil to one or more other neutrophils via adhesion molecules." [GOC:sl, PMID:12972508]	4	2557	1	21118	0.000391083	0.25	query_1	['GO:0070486']
881	GO:BP	GO:0070486	leukocyte aggregation	1	FALSE	"The adhesion of one leukocyte to one or more other leukocytes via adhesion molecules." [GOC:sl, PMID:12972508]	18	2557	1	21118	0.000391083	0.0555556	query_1	['GO:0007159']
882	GO:BP	GO:0070482	response to oxygen levels	1	FALSE	"Any process that results in a change in state or activity of a cell or an organism (in terms of movement, secretion, enzyme production, gene expression, etc.) as a result of a stimulus reflecting the presence, absence, or concentration of oxygen." [GOC:BHF, GOC:mah]	368	2557	65	21118	0.0254204	0.17663	query_1	['GO:0009628']
883	GO:BP	GO:0070476	rRNA (guanine-N7)-methylation	1	FALSE	"The addition of a methyl group to the N7 atom in the base portion of a guanine nucleotide residue in an rRNA molecule." [GOC:mah]	2	2557	2	21118	0.000782167	1	query_1	['GO:0036265', 'GO:0070475']
884	GO:BP	GO:0070475	rRNA base methylation	1	FALSE	"The addition of a methyl group to an atom in the nucleoside base portion of a nucleotide residue in an rRNA molecule." [GOC:mah]	7	2557	4	21118	0.00156433	0.571429	query_1	['GO:0031167']
885	GO:BP	GO:0070459	prolactin secretion	1	FALSE	"The regulated release of prolactin, a peptide hormone that stimulates lactation, from secretory granules in the anterior pituitary." [GOC:mah, ISBN:0198506732]	7	2557	2	21118	0.000782167	0.285714	query_1	['GO:0009306', 'GO:0030072']
886	GO:BP	GO:0070453	regulation of heme biosynthetic process	1	FALSE	"Any process that modulates the frequency, rate or extent of the chemical reactions and pathways resulting in the formation of heme." [GOC:mah]	3	2557	1	21118	0.000391083	0.333333	query_1	['GO:0006783', 'GO:1901463']
887	GO:BP	GO:0070384	Harderian gland development	1	FALSE	"The process whose specific outcome is the progression of the Harderian gland over time, from its formation to the mature structure. The Harderian gland is an anterior orbital structure usually associated with the nictitating membrane, and produces and secretes a variety of substances to the eye, depending upon the species." [GOC:hjd, PMID:16856596, PMID:7559104]	4	2557	1	21118	0.000391083	0.25	query_1	['GO:0048732']
888	GO:BP	GO:0070537	histone H2A K63-linked deubiquitination	1	FALSE	"A protein deubiquitination process in which a K63-linked ubiquitin chain, i.e. a polymer of ubiquitin formed by linkages between lysine residues at position 63 of the ubiquitin monomers, is removed from a lysine residue in histone H2A or the variant H2AX." [GOC:mah, PMID:19202061, PMID:19214193]	4	2557	1	21118	0.000391083	0.25	query_1	['GO:0016578', 'GO:0070536']
889	GO:BP	GO:0070542	response to fatty acid	1	FALSE	"Any process that results in a change in state or activity of a cell or an organism (in terms of movement, secretion, enzyme production, gene expression, etc.) as a result of a fatty acid stimulus." [GOC:lp]	72	2557	10	21118	0.00391083	0.138889	query_1	['GO:0033993', 'GO:1901700']
890	GO:BP	GO:0070544	histone H3-K36 demethylation	1	FALSE	"The modification of histone H3 by the removal of a methyl group from lysine at position 36 of the histone." [GOC:sart, PMID:19061644]	10	2557	1	21118	0.000391083	0.1	query_1	['GO:0070076']
891	GO:BP	GO:0070555	response to interleukin-1	1	FALSE	"Any process that results in a change in state or activity of a cell or an organism (in terms of movement, secretion, enzyme production, gene expression, etc.) as a result of an interleukin-1 stimulus." [GOC:BHF, GOC:mah]	131	2557	12	21118	0.004693	0.0916031	query_1	['GO:0034097']
892	GO:BP	GO:0070665	positive regulation of leukocyte proliferation	1	FALSE	"Any process that activates or increases the frequency, rate or extent of leukocyte proliferation." [GOC:add, GOC:mah]	148	2557	17	21118	0.00664842	0.114865	query_1	['GO:0008284', 'GO:0070661', 'GO:0070663']
893	GO:BP	GO:0070664	negative regulation of leukocyte proliferation	1	FALSE	"Any process that stops, prevents, or reduces the frequency, rate or extent of leukocyte proliferation." [GOC:add, GOC:mah]	92	2557	10	21118	0.00391083	0.108696	query_1	['GO:0008285', 'GO:0070661', 'GO:0070663']
894	GO:BP	GO:0070663	regulation of leukocyte proliferation	1	FALSE	"Any process that modulates the frequency, rate or extent of leukocyte proliferation." [GOC:add, GOC:mah]	243	2557	28	21118	0.0109503	0.115226	query_1	['GO:0042127', 'GO:0070661']
895	GO:BP	GO:0070661	leukocyte proliferation	1	FALSE	"The expansion of a leukocyte population by cell division." [GOC:add]	339	2557	37	21118	0.0144701	0.109145	query_1	['GO:0008283']
896	GO:BP	GO:0070650	actin filament bundle distribution	1	FALSE	"Any cellular process that establishes the spatial arrangement of actin filament bundles within the cell." [GOC:mah]	2	2557	1	21118	0.000391083	0.5	query_1	['GO:0061572']
897	GO:BP	GO:0070649	formin-nucleated actin cable assembly	1	FALSE	"The aggregation, arrangement and bonding together of a set of components to form a formin-nucleated actin cable. A formin-nucleated actin cable is an actin filament bundle that consists of short filaments organized into bundles of uniform polarity, and is nucleated by formins." [GOC:mah, PMID:14671023, PMID:16959963]	3	2557	1	21118	0.000391083	0.333333	query_1	['GO:0030046', 'GO:0110009']
898	GO:BP	GO:0046851	negative regulation of bone remodeling	1	FALSE	"Any process that stops, prevents, or reduces the frequency, rate or extent of bone remodeling." [GOC:ai]	20	2557	1	21118	0.000391083	0.05	query_1	['GO:0034104', 'GO:0046849', 'GO:0046850']
899	GO:BP	GO:0046854	phosphatidylinositol phosphate biosynthetic process	1	FALSE	"The chemical reactions and pathways resulting in the formation of phosphatidylinositol phosphate." [ISBN:0198506732]	58	2557	11	21118	0.00430192	0.189655	query_1	['GO:0006661']
900	GO:BP	GO:0070646	protein modification by small protein removal	1	FALSE	"A protein modification process in which one or more covalently attached groups of a small protein, such as ubiquitin or a ubiquitin-like protein, are removed from a target protein." [GOC:mah]	140	2557	28	21118	0.0109503	0.2	query_1	['GO:0006508', 'GO:0070647']
901	GO:BP	GO:0046855	inositol phosphate dephosphorylation	1	FALSE	"The process of removing a phosphate group from any mono- or polyphosphorylated inositol." [ISBN:0198506732]	16	2557	4	21118	0.00156433	0.25	query_1	['GO:0046838', 'GO:0071545']
902	GO:BP	GO:0046856	phosphatidylinositol dephosphorylation	1	FALSE	"The process of removing one or more phosphate groups from a phosphatidylinositol." [ISBN:0198506732]	30	2557	4	21118	0.00156433	0.133333	query_1	['GO:0046488', 'GO:0046839']
903	GO:BP	GO:0070640	vitamin D3 metabolic process	1	FALSE	"The chemical reactions and pathways involving vitamin D3, (3S,5Z,7E)-9,10-secocholesta-5,7,10(19)-trien-3-ol." [GOC:BHF, GOC:mah]	6	2557	1	21118	0.000391083	0.166667	query_1	['GO:0042359', 'GO:1902652']
904	GO:BP	GO:0070633	transepithelial transport	1	FALSE	"The directed movement of a substance from one side of an epithelium to the other." [GOC:mah, GOC:yaf, ISBN:0716731363]	26	2557	4	21118	0.00156433	0.153846	query_1	['GO:0006810']
905	GO:BP	GO:0070383	DNA cytosine deamination	1	FALSE	"The removal of an amino group from a cytosine residue in DNA, forming a uracil residue." [GOC:mah]	4	2557	1	21118	0.000391083	0.25	query_1	['GO:0045006']
906	GO:BP	GO:0070613	regulation of protein processing	1	FALSE	"Any process that modulates the frequency, rate or extent of protein processing, any protein maturation process achieved by the cleavage of a peptide bond or bonds within a protein." [GOC:mah]	60	2557	9	21118	0.00351975	0.15	query_1	['GO:0016485', 'GO:0030162', 'GO:1903317']
907	GO:BP	GO:0070601	centromeric sister chromatid cohesion	1	FALSE	"The cell cycle process in which the sister chromatids of a replicated chromosome are joined along the length of the centromeric region of the chromosome." [GOC:mah]	11	2557	6	21118	0.0023465	0.545455	query_1	['GO:0007062']
908	GO:BP	GO:0070593	dendrite self-avoidance	1	FALSE	"The process in which dendrites recognize and avoid contact with sister dendrites from the same cell." [GOC:sart, PMID:17482551]	14	2557	2	21118	0.000782167	0.142857	query_1	['GO:0008038']
909	GO:BP	GO:0070588	calcium ion transmembrane transport	1	FALSE	"A process in which a calcium ion is transported from one side of a membrane to the other by means of some agent such as a transporter or pore." [GOC:mah]	317	2557	42	21118	0.0164255	0.132492	query_1	['GO:0006816', 'GO:0098662']
910	GO:BP	GO:0046877	regulation of saliva secretion	1	FALSE	"Any process that modulates the frequency, rate or extent of the regulated release of saliva from a cell or a tissue." [GOC:ai]	9	2557	2	21118	0.000782167	0.222222	query_1	['GO:0044058', 'GO:0046541', 'GO:0050878', 'GO:0051046']
911	GO:BP	GO:0070584	mitochondrion morphogenesis	1	FALSE	"The process in which the anatomical structures of a mitochondrion are generated and organized." [GOC:mah]	32	2557	8	21118	0.00312867	0.25	query_1	['GO:0007005', 'GO:0032990']
912	GO:BP	GO:0070572	positive regulation of neuron projection regeneration	1	FALSE	"Any process that activates or increases the frequency, rate or extent of neuron projection regeneration, the regrowth of neuronal processes such as axons or dendrites following their loss or damage." [GOC:mah]	16	2557	2	21118	0.000782167	0.125	query_1	['GO:0010976', 'GO:0031102', 'GO:0048584', 'GO:0051094', 'GO:0070570']
913	GO:BP	GO:0070571	negative regulation of neuron projection regeneration	1	FALSE	"Any process that stops, prevents, or reduces the frequency, rate or extent of neuron projection regeneration, the regrowth of neuronal processes such as axons or dendrites following their loss or damage." [GOC:mah]	16	2557	3	21118	0.00117325	0.1875	query_1	['GO:0010977', 'GO:0031102', 'GO:0048585', 'GO:0051093', 'GO:0070570']
914	GO:BP	GO:0070570	regulation of neuron projection regeneration	1	FALSE	"Any process that modulates the rate, frequency or extent of neuron projection regeneration, the regrowth of neuronal processes such as axons or dendrites following their loss or damage." [GOC:mah]	37	2557	7	21118	0.00273758	0.189189	query_1	['GO:0010975', 'GO:0031102', 'GO:0050793', 'GO:0080135']
915	GO:BP	GO:0070564	positive regulation of vitamin D receptor signaling pathway	1	FALSE	"Any process that activates or increases the frequency, rate or extent of vitamin D receptor signaling pathway activity." [GOC:BHF, GOC:mah]	3	2557	1	21118	0.000391083	0.333333	query_1	['GO:0009967', 'GO:0070561', 'GO:0070562']
916	GO:BP	GO:0070563	negative regulation of vitamin D receptor signaling pathway	1	FALSE	"Any process that stops, prevents, or reduces the frequency, rate or extent of the vitamin D receptor signaling pathway activity." [GOC:BHF, GOC:mah]	2	2557	1	21118	0.000391083	0.5	query_1	['GO:0009968', 'GO:0070561', 'GO:0070562']
917	GO:BP	GO:0070562	regulation of vitamin D receptor signaling pathway	1	FALSE	"Any process that modulates the frequency, rate or extent of vitamin D receptor signaling pathway activity." [GOC:BHF, GOC:mah]	7	2557	2	21118	0.000782167	0.285714	query_1	['GO:0009966', 'GO:0032107', 'GO:0070561']
918	GO:BP	GO:0070561	vitamin D receptor signaling pathway	1	FALSE	"The series of molecular signals generated as a consequence of a vitamin D receptor binding to one of its physiological ligands." [GOC:BHF, GOC:mah, PMID:12637589]	9	2557	2	21118	0.000782167	0.222222	query_1	['GO:0030522', 'GO:0071305']
919	GO:BP	GO:0046878	positive regulation of saliva secretion	1	FALSE	"Any process that activates or increases the frequency, rate or extent of the regulated release of saliva." [GOC:ai]	5	2557	2	21118	0.000782167	0.4	query_1	['GO:0046541', 'GO:0046877', 'GO:0051047', 'GO:0060456']
920	GO:BP	GO:0070602	regulation of centromeric sister chromatid cohesion	1	FALSE	"Any process that modulates the frequency, rate or extent of sister chromatid cohesion in the centromeric region of a chromosome." [GOC:mah]	4	2557	3	21118	0.00117325	0.75	query_1	['GO:0007063', 'GO:0070601']
921	GO:BP	GO:0070374	positive regulation of ERK1 and ERK2 cascade	1	FALSE	"Any process that activates or increases the frequency, rate or extent of signal transduction mediated by the ERK1 and ERK2 cascade." [GOC:mah]	225	2557	20	21118	0.00782167	0.0888889	query_1	['GO:0043410', 'GO:0070371', 'GO:0070372']
922	GO:BP	GO:0070373	negative regulation of ERK1 and ERK2 cascade	1	FALSE	"Any process that stops, prevents, or reduces the frequency, rate or extent of signal transduction mediated by the ERK1 and ERK2 cascade." [GOC:add, ISBN:0121245462, ISBN:0896039986]	83	2557	10	21118	0.00391083	0.120482	query_1	['GO:0043409', 'GO:0070371', 'GO:0070372']
923	GO:BP	GO:0070372	regulation of ERK1 and ERK2 cascade	1	FALSE	"Any process that modulates the frequency, rate or extent of signal transduction mediated by the ERK1 and ERK2 cascade." [GOC:add, ISBN:0121245462, ISBN:0896039986]	325	2557	33	21118	0.0129057	0.101538	query_1	['GO:0043408', 'GO:0070371']
924	GO:BP	GO:0070257	positive regulation of mucus secretion	1	FALSE	"Any process that activates or increases the frequency, rate or extent of the regulated release of mucus from a cell or a tissue." [GOC:add]	10	2557	4	21118	0.00156433	0.4	query_1	['GO:0051047', 'GO:0051240', 'GO:0070254', 'GO:0070255']
925	GO:BP	GO:0046940	nucleoside monophosphate phosphorylation	1	FALSE	"The process of introducing one or more phosphate groups into a nucleoside monophosphate to produce a polyphosphorylated nucleoside." [GOC:ai]	13	2557	3	21118	0.00117325	0.230769	query_1	['GO:0009123', 'GO:0009165']
926	GO:BP	GO:0070254	mucus secretion	1	FALSE	"The regulated release of mucus by the mucosa. Mucus is a viscous slimy secretion consisting of mucins and various inorganic salts dissolved in water, with suspended epithelial cells and leukocytes. The mucosa, or mucous membrane, is the membrane covered with epithelium that lines the tubular organs of the body. Mucins are carbohydrate-rich glycoproteins that have a lubricating and protective fun…	17	2557	5	21118	0.00195542	0.294118	query_1	['GO:0007589', 'GO:0032941']
927	GO:BP	GO:0070252	actin-mediated cell contraction	1	FALSE	"The actin filament-based process in which cytoplasmic actin filaments slide past one another resulting in contraction of all or part of the cell body." [GOC:mah]	100	2557	18	21118	0.0070395	0.18	query_1	['GO:0030048']
928	GO:BP	GO:0070244	negative regulation of thymocyte apoptotic process	1	FALSE	"Any process that stops, prevents, or reduces the frequency, rate or extent of thymocyte death by apoptotic process." [GOC:add, GOC:mtg_apoptosis, ISBN:0781765196]	7	2557	1	21118	0.000391083	0.142857	query_1	['GO:0070233', 'GO:0070242', 'GO:0070243']
929	GO:BP	GO:0070243	regulation of thymocyte apoptotic process	1	FALSE	"Any process that modulates the occurrence or rate of thymocyte death by apoptotic process." [GOC:add, GOC:mtg_apoptosis, ISBN:0781765196]	14	2557	2	21118	0.000782167	0.142857	query_1	['GO:0070232', 'GO:0070242']
930	GO:BP	GO:0070242	thymocyte apoptotic process	1	FALSE	"Any apoptotic process in a thymocyte, an immature T cell located in the thymus." [CL:0000893, GOC:add, GOC:mtg_apoptosis, ISBN:0781765196]	19	2557	5	21118	0.00195542	0.263158	query_1	['GO:0070231']
931	GO:BP	GO:0070236	negative regulation of activation-induced cell death of T cells	1	FALSE	"Any process that stops, prevents, or reduces the frequency, rate or extent of activation-induced cell death of T cells." [GOC:add, ISBN:0781765196]	4	2557	1	21118	0.000391083	0.25	query_1	['GO:0002683', 'GO:0006924', 'GO:0070233', 'GO:0070235']
932	GO:BP	GO:0070235	regulation of activation-induced cell death of T cells	1	FALSE	"Any process that modulates the occurrence or rate of activation-induced cell death of T cells." [GOC:add, ISBN:0781765196]	6	2557	1	21118	0.000391083	0.166667	query_1	['GO:0002682', 'GO:0006924', 'GO:0070232']
933	GO:BP	GO:0070234	positive regulation of T cell apoptotic process	1	FALSE	"Any process that activates or increases the frequency, rate or extent of T cell death by apoptotic process." [GOC:add, GOC:mtg_apoptosis, ISBN:0781765196]	12	2557	1	21118	0.000391083	0.0833333	query_1	['GO:0070230', 'GO:0070231', 'GO:0070232']
934	GO:BP	GO:0070233	negative regulation of T cell apoptotic process	1	FALSE	"Any process that stops, prevents, or reduces the frequency, rate or extent of T cell death by apoptotic process." [GOC:add, GOC:mtg_apoptosis, ISBN:0781765196]	22	2557	2	21118	0.000782167	0.0909091	query_1	['GO:0070229', 'GO:0070231', 'GO:0070232']
935	GO:BP	GO:0070232	regulation of T cell apoptotic process	1	FALSE	"Any process that modulates the occurrence or rate of T cell death by apoptotic process." [GOC:add, GOC:mtg_apoptosis, ISBN:0781765196]	36	2557	4	21118	0.00156433	0.111111	query_1	['GO:0070228', 'GO:0070231']
936	GO:BP	GO:0070231	T cell apoptotic process	1	FALSE	"Any apoptotic process in a T cell, a type of lymphocyte whose defining characteristic is the expression of a T cell receptor complex." [CL:0000084, GOC:add, GOC:mtg_apoptosis, ISBN:0781765196]	53	2557	8	21118	0.00312867	0.150943	query_1	['GO:0070227']
937	GO:BP	GO:0070262	peptidyl-serine dephosphorylation	1	FALSE	"The removal of phosphoric residues from peptidyl-O-phospho-L-serine to form peptidyl-serine." [GOC:bf]	17	2557	5	21118	0.00195542	0.294118	query_1	['GO:0006470']
938	GO:BP	GO:0070230	positive regulation of lymphocyte apoptotic process	1	FALSE	"Any process that activates or increases the frequency, rate or extent of lymphocyte death by apoptotic process." [GOC:add, GOC:mtg_apoptosis, ISBN:0781765196]	18	2557	2	21118	0.000782167	0.111111	query_1	['GO:0070227', 'GO:0070228', 'GO:2000108']
939	GO:BP	GO:0070228	regulation of lymphocyte apoptotic process	1	FALSE	"Any process that modulates the occurrence or rate of lymphocyte death by apoptotic process." [GOC:add, GOC:mtg_apoptosis, ISBN:0781765196]	59	2557	7	21118	0.00273758	0.118644	query_1	['GO:0070227', 'GO:2000106']
940	GO:BP	GO:0070227	lymphocyte apoptotic process	1	FALSE	"Any apoptotic process in a lymphocyte, a leukocyte commonly found in the blood and lymph that has the characteristics of a large nucleus, a neutral staining cytoplasm, and prominent heterochromatin." [CL:0000542, GOC:add, GOC:mtg_apoptosis, ISBN:0781765196]	79	2557	10	21118	0.00391083	0.126582	query_1	['GO:0071887']
941	GO:BP	GO:0070213	protein auto-ADP-ribosylation	1	FALSE	"The ADP-ribosylation by a protein of one or more of its own amino acid residues, or residues on an identical protein." [GOC:BHF, GOC:rl]	12	2557	3	21118	0.00117325	0.25	query_1	['GO:0006471']
942	GO:BP	GO:0070212	protein poly-ADP-ribosylation	1	FALSE	"The transfer of multiple ADP-ribose residues from NAD to a protein amino acid, forming a poly(ADP-ribose) chain." [GOC:BHF, GOC:mah, GOC:rl, PMID:25043379]	8	2557	2	21118	0.000782167	0.25	query_1	['GO:0006471']
943	GO:BP	GO:0070207	protein homotrimerization	1	FALSE	"The formation of a protein homotrimer, a macromolecular structure consisting of three noncovalently associated identical subunits." [GOC:hjd]	15	2557	1	21118	0.000391083	0.0666667	query_1	['GO:0051260', 'GO:0070206']
944	GO:BP	GO:0070206	protein trimerization	1	FALSE	"The formation of a protein trimer, a macromolecular structure consisting of three noncovalently associated identical or nonidentical subunits." [GOC:hjd]	18	2557	1	21118	0.000391083	0.0555556	query_1	['GO:0051259']
945	GO:BP	GO:0046883	regulation of hormone secretion	1	FALSE	"Any process that modulates the frequency, rate or extent of the regulated release of a hormone from a cell." [GOC:ai]	298	2557	39	21118	0.0152522	0.130872	query_1	['GO:0010646', 'GO:0010817', 'GO:0023051', 'GO:0046879', 'GO:1903530']
946	GO:BP	GO:0046884	follicle-stimulating hormone secretion	1	FALSE	"The regulated release of follicle-stimulating hormone, a gonadotropic glycoprotein hormone secreted by the anterior pituitary." [ISBN:0198506732]	11	2557	2	21118	0.000782167	0.181818	query_1	['GO:0032274']
947	GO:BP	GO:0046885	regulation of hormone biosynthetic process	1	FALSE	"Any process that modulates the frequency, rate or extent of the chemical reactions and pathways resulting in the formation of hormones." [GOC:ai]	27	2557	5	21118	0.00195542	0.185185	query_1	['GO:0031326', 'GO:0032350', 'GO:0042446']
948	GO:BP	GO:0046886	positive regulation of hormone biosynthetic process	1	FALSE	"Any process that activates or increases the frequency, rate or extent of the chemical reactions and pathways resulting in the formation of hormones." [GOC:ai]	12	2557	2	21118	0.000782167	0.166667	query_1	['GO:0031328', 'GO:0032352', 'GO:0042446', 'GO:0046885']
949	GO:BP	GO:0070194	synaptonemal complex disassembly	1	FALSE	"The controlled breakdown of a synaptonemal complex." [GOC:mah]	2	2557	1	21118	0.000391083	0.5	query_1	['GO:0022411', 'GO:0070193']
950	GO:BP	GO:0070193	synaptonemal complex organization	1	FALSE	"A process that is carried out at the cellular level which results in the assembly, arrangement of constituent parts, or disassembly of a synaptonemal complex. A synaptonemal complex is a proteinaceous scaffold formed between homologous chromosomes during meiosis." [GOC:mah]	26	2557	5	21118	0.00195542	0.192308	query_1	['GO:0051276']
951	GO:BP	GO:0070189	kynurenine metabolic process	1	FALSE	"The chemical reactions and pathways involving kynurenine, the amino acid 3-(2-aminobenzoyl)-alanine." [CHEBI:28683, GOC:mah, GOC:rph]	11	2557	1	21118	0.000391083	0.0909091	query_1	['GO:0042180', 'GO:0042537', 'GO:1901605']
952	GO:BP	GO:0070229	negative regulation of lymphocyte apoptotic process	1	FALSE	"Any process that stops, prevents, or reduces the frequency, rate or extent of lymphocyte death by apoptotic process." [GOC:add, GOC:mtg_apoptosis, ISBN:0781765196]	34	2557	4	21118	0.00156433	0.117647	query_1	['GO:0070227', 'GO:0070228', 'GO:2000107']
953	GO:BP	GO:0070170	regulation of tooth mineralization	1	FALSE	"Any process that modulates the frequency, rate or extent of tooth mineralization, the deposition of calcium salts in tooth structures." [GOC:BHF, GOC:mah]	7	2557	1	21118	0.000391083	0.142857	query_1	['GO:0034505', 'GO:0070167']
954	GO:BP	GO:0070265	necrotic cell death	1	FALSE	"A type of cell death that is morphologically characterized by an increasingly translucent cytoplasm, swelling of organelles, minor ultrastructural modifications of the nucleus (specifically, dilatation of the nuclear membrane and condensation of chromatin into small, irregular, circumscribed patches) and increased cell volume (oncosis), culminating in the disruption of the plasma membrane and su…	63	2557	17	21118	0.00664842	0.269841	query_1	['GO:0008219']
955	GO:BP	GO:0070267	oncosis	1	FALSE	"A cellular process that results in swelling of the cell body, and that is morphologically characteristic of necrotic cell death." [PMID:17873035, PMID:18846107]	1	2557	1	21118	0.000391083	1	query_1	['GO:0045793', 'GO:0070265']
956	GO:BP	GO:0070371	ERK1 and ERK2 cascade	1	FALSE	"An intracellular protein kinase cascade containing at least ERK1 or ERK2 (MAPKs), a MEK (a MAPKK) and a MAP3K. The cascade may involve 4 different kinases, as it can also contain an additional tier: the upstream MAP4K. The kinases in each tier phosphorylate and activate the kinase in the downstream tier to transmit a signal within a cell." [GOC:add, GOC:signaling, ISBN:0121245462, ISBN:089603998…	344	2557	36	21118	0.014079	0.104651	query_1	['GO:0000165']
957	GO:BP	GO:0070370	cellular heat acclimation	1	FALSE	"Any process that increases heat tolerance of a cell in response to high temperatures." [GOC:jp]	3	2557	2	21118	0.000782167	0.666667	query_1	['GO:0010286', 'GO:0034605']
958	GO:BP	GO:0070365	hepatocyte differentiation	1	FALSE	"The process in which a relatively unspecialized cell acquires the specialized features of a hepatocyte. A hepatocyte is specialized epithelial cell that is organized into interconnected plates called lobules, and is the main structural component of the liver." [CL:0000182, PMID:7588884]	19	2557	3	21118	0.00117325	0.157895	query_1	['GO:0001889', 'GO:0030855']
959	GO:BP	GO:0070358	actin polymerization-dependent cell motility	1	FALSE	"A process involved in the controlled movement of a bacterial cell powered by the continuous polymerization of actin at one pole of the cell." [GOC:mah, PMID:15773977]	3	2557	1	21118	0.000391083	0.333333	query_1	['GO:0048870']
960	GO:BP	GO:0070346	positive regulation of fat cell proliferation	1	FALSE	"Any process that activates or increases the rate or extent of fat cell proliferation." [GOC:mah, GOC:sl]	4	2557	1	21118	0.000391083	0.25	query_1	['GO:0008284', 'GO:0070341', 'GO:0070344']
961	GO:BP	GO:0070345	negative regulation of fat cell proliferation	1	FALSE	"Any process that stops or decreases the rate or extent of fat cell proliferation." [GOC:mah, GOC:sl]	7	2557	3	21118	0.00117325	0.428571	query_1	['GO:0008285', 'GO:0070341', 'GO:0070344']
962	GO:BP	GO:0070344	regulation of fat cell proliferation	1	FALSE	"Any process that modulates the frequency, rate or extent of fat cell proliferation." [GOC:mah, GOC:sl]	12	2557	4	21118	0.00156433	0.333333	query_1	['GO:0042127', 'GO:0070341']
963	GO:BP	GO:0070341	fat cell proliferation	1	FALSE	"The multiplication or reproduction of fat cells by cell division, resulting in the expansion of their population. A fat cell is an animal connective tissue cell specialized for the synthesis and storage of fat." [GOC:mah, GOC:sl]	12	2557	4	21118	0.00156433	0.333333	query_1	['GO:0008283']
964	GO:BP	GO:0070328	triglyceride homeostasis	1	FALSE	"Any process involved in the maintenance of an internal steady state of triglyceride within an organism or cell." [GOC:BHF, GOC:mah]	41	2557	1	21118	0.000391083	0.0243902	query_1	['GO:0055090']
965	GO:BP	GO:0070327	thyroid hormone transport	1	FALSE	"The directed movement of thyroid hormone into, out of or within a cell, or between cells, by means of some agent such as a transporter or pore." [GOC:rph]	11	2557	2	21118	0.000782167	0.181818	query_1	['GO:0009914']
966	GO:BP	GO:0070318	positive regulation of G0 to G1 transition	1	FALSE	"A cell cycle process that activates or increases the rate or extent of the transition from the G0 quiescent state to the G1 phase." [GOC:mah]	5	2557	1	21118	0.000391083	0.2	query_1	['GO:0045023', 'GO:0070316', 'GO:0090068']
967	GO:BP	GO:0070317	negative regulation of G0 to G1 transition	1	FALSE	"A cell cycle process that stops, prevents, or reduces the rate or extent of the transition from the G0 quiescent state to the G1 phase." [GOC:mah]	5	2557	2	21118	0.000782167	0.4	query_1	['GO:0010948', 'GO:0045023', 'GO:0070316']
968	GO:BP	GO:0070316	regulation of G0 to G1 transition	1	FALSE	"A cell cycle process that modulates the rate or extent of the transition from the G0 quiescent state to the G1 phase." [GOC:mah]	11	2557	3	21118	0.00117325	0.272727	query_1	['GO:0010564', 'GO:0045023']
969	GO:BP	GO:0070266	necroptotic process	1	FALSE	"A programmed necrotic cell death process which begins when a cell receives a signal (e.g. a ligand binding to a death receptor or to a Toll-like receptor), and proceeds through a series of biochemical events (signaling pathways), characterized by activation of receptor-interacting serine/threonine-protein kinase 1 and/or 3 (RIPK1/3, also called RIP1/3) and by critical dependence on mixed lineage…	34	2557	11	21118	0.00430192	0.323529	query_1	['GO:0097300']
970	GO:BP	GO:0070315	G1 to G0 transition involved in cell differentiation	1	FALSE	"A cell cycle arrest process that results in arrest during G1 phase, whereupon the cell enters G0 phase, in the context of cell differentiation." [GOC:mah, ISBN:0815316194]	2	2557	1	21118	0.000391083	0.5	query_1	['GO:0030154', 'GO:0070314']
971	GO:BP	GO:0070309	lens fiber cell morphogenesis	1	FALSE	"The process in which the structures of a lens fiber cell are generated and organized. This process occurs while the initially relatively unspecialized cell is acquiring the specialized features of a lens fiber cell. A lens fiber cell is any of the elongated, tightly packed cells that make up the bulk of the mature lens in a camera-type eye." [GOC:mah, PMID:7693735]	7	2557	2	21118	0.000782167	0.285714	query_1	['GO:0000904', 'GO:0002089', 'GO:0070307']
972	GO:BP	GO:0070307	lens fiber cell development	1	FALSE	"The process whose specific outcome is the progression of a lens fiber cell over time, from its formation to the mature structure. Cell development does not include the steps involved in committing a cell to a lens fiber cell fate. A lens fiber cell is any of the elongated, tightly packed cells that make up the bulk of the mature lens in a camera-type eye." [GOC:mah, PMID:7693735]	13	2557	5	21118	0.00195542	0.384615	query_1	['GO:0002064', 'GO:0070306']
973	GO:BP	GO:0070306	lens fiber cell differentiation	1	FALSE	"The process in which a relatively unspecialized cell acquires specialized features of a lens fiber cell, any of the elongated, tightly packed cells that make up the bulk of the mature lens in the camera-type eye. The cytoplasm of a lens fiber cell is devoid of most intracellular organelles including the cell nucleus, and contains primarily crystallins, a group of water-soluble proteins expressed…	35	2557	9	21118	0.00351975	0.257143	query_1	['GO:0002088', 'GO:0030855']
974	GO:BP	GO:0070304	positive regulation of stress-activated protein kinase signaling cascade	1	FALSE	"Any process that activates or increases the frequency, rate or extent of signaling via the stress-activated protein kinase signaling cascade." [GOC:mah]	119	2557	18	21118	0.0070395	0.151261	query_1	['GO:0031098', 'GO:0070302', 'GO:1902533']
975	GO:BP	GO:0070303	negative regulation of stress-activated protein kinase signaling cascade	1	FALSE	"Any process that stops, prevents, or reduces the frequency, rate or extent of signaling via the stress-activated protein kinase signaling cascade." [GOC:mah]	47	2557	8	21118	0.00312867	0.170213	query_1	['GO:0031098', 'GO:0070302', 'GO:1902532']
976	GO:BP	GO:0070302	regulation of stress-activated protein kinase signaling cascade	1	FALSE	"Any process that modulates the frequency, rate or extent of signaling via a stress-activated protein kinase signaling cascade." [GOC:mah]	185	2557	31	21118	0.0121236	0.167568	query_1	['GO:0031098', 'GO:0080135', 'GO:1902531']
977	GO:BP	GO:0070301	cellular response to hydrogen peroxide	1	FALSE	"Any process that results in a change in state or activity of a cell (in terms of movement, secretion, enzyme production, gene expression, etc.) as a result of a hydrogen peroxide (H2O2) stimulus." [CHEBI:16240, GOC:mah]	109	2557	19	21118	0.00743058	0.174312	query_1	['GO:0034614', 'GO:0042542']
978	GO:BP	GO:0070296	sarcoplasmic reticulum calcium ion transport	1	FALSE	"The directed movement of calcium ions (Ca2+) into, out of or within the sarcoplasmic reticulum." [GOC:BHF, GOC:vk]	34	2557	3	21118	0.00117325	0.0882353	query_1	['GO:0006816']
979	GO:BP	GO:0070295	renal water absorption	1	FALSE	"A renal system process in which water is taken up from the collecting ducts and proximal and distal loops of the nephron. In non-mammalian species, absorption may occur in related structures." [GOC:dph, GOC:mah]	7	2557	1	21118	0.000391083	0.142857	query_1	['GO:0003097', 'GO:0070293']
980	GO:BP	GO:0070293	renal absorption	1	FALSE	"A renal system process in which water, ions, glucose and proteins are taken up from the collecting ducts, glomerulus and proximal and distal loops of the nephron. In non-mammalian species, absorption may occur in related structures (e.g. protein absorption is observed in nephrocytes in Drosophila, see PMID:23264686)." [GOC:dph, GOC:mah, GOC:yaf]	19	2557	1	21118	0.000391083	0.0526316	query_1	['GO:0003014']
981	GO:BP	GO:0070291	N-acylethanolamine metabolic process	1	FALSE	"The chemical reactions and pathways involving N-acylethanolamines. An N-acylethanolamine is an ethanolamine substituted at nitrogen by an acyl group." [CHEBI:52640, GOC:elh, PMID:14634025, PMID:15878693]	6	2557	1	21118	0.000391083	0.166667	query_1	['GO:0034308', 'GO:0042439']
982	GO:BP	GO:0070269	pyroptosis	1	FALSE	"A caspase-1-dependent cell death subroutine that is associated with the generation of pyrogenic mediators such as IL-1beta and IL-18." [GOC:mtg_apoptosis, PMID:18846107, PMID:21760595]	24	2557	3	21118	0.00117325	0.125	query_1	['GO:0012501']
983	GO:BP	GO:0070268	cornification	1	FALSE	"A type of programmed cell death that occurs in the epidermis, morphologically and biochemically distinct from apoptosis. It leads to the formation of corneocytes, i.e. dead keratinocytes containing an amalgam of specific proteins (e.g., keratin, loricrin, SPR and involucrin) and lipids (e.g., fatty acids and ceramides), which are necessary for the function of the cornified skin layer (mechanical…	4	2557	1	21118	0.000391083	0.25	query_1	['GO:0012501', 'GO:0031424']
984	GO:BP	GO:0070314	G1 to G0 transition	1	FALSE	"A cell cycle arrest process that results in arrest during G1 phase, whereupon the cell enters a specialized resting state known as G0 or quiescence." [GOC:mah, GOC:mtg_cell_cycle, ISBN:0815316194]	9	2557	3	21118	0.00117325	0.333333	query_1	['GO:0022402']
985	GO:BP	GO:0046942	carboxylic acid transport	1	FALSE	"The directed movement of carboxylic acids into, out of or within a cell, or between cells, by means of some agent such as a transporter or pore. Carboxylic acids are organic acids containing one or more carboxyl (COOH) groups or anions (COO-)." [GOC:ai]	297	2557	29	21118	0.0113414	0.0976431	query_1	['GO:0015711']
986	GO:BP	GO:0061837	neuropeptide processing	1	FALSE	"Any protein maturation process achieved by the cleavage of a peptide bond or bonds within a neuropeptide precursor. Processing leads to the attainment of the full functional capacity of the neuropeptide." [PMID:12657671, PMID:17564681]	1	2557	1	21118	0.000391083	1	query_1	['GO:0140448']
987	GO:BP	GO:0062112	fatty acid primary amide biosynthetic process	1	FALSE	"The chemical reactions and pathways resulting in the formation of a fatty acid primary amide." [PMID:10079066, PMID:15952893]	1	2557	1	21118	0.000391083	1	query_1	['GO:0008610', 'GO:0043604', 'GO:0062126', 'GO:1901566', 'GO:1901570']
988	GO:BP	GO:0061178	regulation of insulin secretion involved in cellular response to glucose stimulus	1	FALSE	"Any process that modulates the frequency, rate or extent of the regulated release of insulin that contributes to the response of a cell to glucose." [GOC:BHF, GOC:dph]	86	2557	11	21118	0.00430192	0.127907	query_1	['GO:0035773', 'GO:0050796', 'GO:0060341']
989	GO:BP	GO:0061162	establishment of monopolar cell polarity	1	FALSE	"The specification and formation of monopolar intracellular organization or cell growth patterns. Monopolar cell organization is directional organization along an axis." [GOC:dph, GOC:vw]	26	2557	6	21118	0.0023465	0.230769	query_1	['GO:0030010', 'GO:0061339']
990	GO:BP	GO:0061158	3'-UTR-mediated mRNA destabilization	1	FALSE	"An mRNA destabilization process in which one or more RNA-binding proteins associate with the 3'-untranslated region (UTR) of an mRNA." [GOC:dph, GOC:jh]	16	2557	2	21118	0.000782167	0.125	query_1	['GO:0061157']
991	GO:BP	GO:0061157	mRNA destabilization	1	FALSE	"Any process that decreases the stability of an mRNA molecule, making it more vulnerable to degradative processes. Messenger RNA is the intermediate molecule between DNA and protein. It includes UTR and coding sequences. It does not contain introns." [GOC:dph, GOC:jh]	74	2557	15	21118	0.00586625	0.202703	query_1	['GO:0017148', 'GO:0043488', 'GO:0050779', 'GO:0061014']
992	GO:BP	GO:0061154	endothelial tube morphogenesis	1	FALSE	"The process in which the anatomical structures of a tube are generated and organized from an endothelium. Endothelium refers to the layer of cells lining blood vessels, lymphatics, the heart, and serous cavities, and is derived from bone marrow or mesoderm. Corneal endothelium is a special case, derived from neural crest cells." [GOC:dph, GOC:yaf]	18	2557	3	21118	0.00117325	0.166667	query_1	['GO:0003159', 'GO:0060562']
993	GO:BP	GO:0061146	Peyer's patch morphogenesis	1	FALSE	"The process in which a Peyer's patch is generated and organized. Peyer's patches are typically found as nodules associated with gut epithelium with distinct internal structures including B- and T-zones for the activation of lymphocytes." [GOC:dph]	3	2557	1	21118	0.000391083	0.333333	query_1	['GO:0048541', 'GO:0048729']
994	GO:BP	GO:0061140	lung secretory cell differentiation	1	FALSE	"The process in which a relatively unspecialized cell acquires specialized features of a lung secretory cell. A lung secretory cell is a specialized epithelial cell of the lung that contains large secretory granules in its apical part." [GOC:dph]	12	2557	1	21118	0.000391083	0.0833333	query_1	['GO:0060487']
995	GO:BP	GO:0061138	morphogenesis of a branching epithelium	1	FALSE	"The process in which the anatomical structures of a branched epithelium are generated and organized." [GOC:dph]	203	2557	26	21118	0.0101682	0.128079	query_1	['GO:0001763', 'GO:0002009']
996	GO:BP	GO:0061117	negative regulation of heart growth	1	FALSE	"Any process that decreases the rate or extent of heart growth. Heart growth is the increase in size or mass of the heart." [GOC:dph, GOC:hjd]	35	2557	5	21118	0.00195542	0.142857	query_1	['GO:0046621', 'GO:0060419', 'GO:0060420']
997	GO:BP	GO:0061101	neuroendocrine cell differentiation	1	FALSE	"The process in which a relatively unspecialized cell acquires specialized structural and/or functional features of a neuroendocrine cell. A neuroendocrine cell is a cell that receives input form a neuron which controls the secretion of an endocrine substance." [GOC:dph]	9	2557	3	21118	0.00117325	0.333333	query_1	['GO:0060563']
998	GO:BP	GO:0048146	positive regulation of fibroblast proliferation	1	FALSE	"Any process that activates or increases the frequency, rate or extent of multiplication or reproduction of fibroblast cells." [GOC:jid]	66	2557	15	21118	0.00586625	0.227273	query_1	['GO:0008284', 'GO:0048144', 'GO:0048145']
999	GO:BP	GO:0048147	negative regulation of fibroblast proliferation	1	FALSE	"Any process that stops, prevents, or reduces the frequency, rate or extent of multiplication or reproduction of fibroblast cells." [GOC:jid]	33	2557	5	21118	0.00195542	0.151515	query_1	['GO:0008285', 'GO:0048144', 'GO:0048145']
1000	GO:BP	GO:0061099	negative regulation of protein tyrosine kinase activity	1	FALSE	"Any process that decreases the rate, frequency, or extent of protein tyrosine kinase activity." [GOC:dph, GOC:tb]	32	2557	5	21118	0.00195542	0.15625	query_1	['GO:0006469', 'GO:0050732', 'GO:0061097']
1001	GO:BP	GO:0061098	positive regulation of protein tyrosine kinase activity	1	FALSE	"Any process that increases the rate, frequency, or extent of protein tyrosine kinase activity." [GOC:dph, GOC:tb]	57	2557	3	21118	0.00117325	0.0526316	query_1	['GO:0045860', 'GO:0050731', 'GO:0061097']
1002	GO:BP	GO:0048148	behavioral response to cocaine	1	FALSE	"Any process that results in a change in the behavior of an organism as a result of a cocaine stimulus." [GOC:jid]	18	2557	3	21118	0.00117325	0.166667	query_1	['GO:0030534', 'GO:0042220']
1003	GO:BP	GO:0048149	behavioral response to ethanol	1	FALSE	"Any process that results in a change in the behavior of an organism as a result of an ethanol stimulus." [GOC:jid]	12	2557	1	21118	0.000391083	0.0833333	query_1	['GO:0030534', 'GO:0045471']
1004	GO:BP	GO:0061097	regulation of protein tyrosine kinase activity	1	FALSE	"Any process that modulates the rate, frequency, or extent of protein tyrosine kinase activity." [GOC:dph, GOC:tb]	92	2557	9	21118	0.00351975	0.0978261	query_1	['GO:0045859', 'GO:0050730']
1005	GO:BP	GO:0061092	positive regulation of phospholipid translocation	1	FALSE	"Any process that increases the frequency, rate or extent of the translocation, or flipping, of phospholipid molecules from one monolayer of a membrane bilayer to the opposite monolayer." [GOC:dph, GOC:jh, GOC:tb, PMID:19966303]	5	2557	1	21118	0.000391083	0.2	query_1	['GO:0045332', 'GO:0051130', 'GO:0061091', 'GO:2001140']
1006	GO:BP	GO:0061091	regulation of phospholipid translocation	1	FALSE	"Any process that modulates the frequency, rate or extent of the translocation, or flipping, of phospholipid molecules from one monolayer of a membrane bilayer to the opposite monolayer." [GOC:dph, GOC:jh, GOC:tb, PMID:19966303]	6	2557	1	21118	0.000391083	0.166667	query_1	['GO:0045332', 'GO:0051128', 'GO:0097035', 'GO:2001138']
1007	GO:BP	GO:0061087	positive regulation of histone H3-K27 methylation	1	FALSE	"Any process that increases the rate, frequency, or extent of histone H3-K27 methylation. Histone H3-K27 methylation is the modification of histone H3 by addition of a methyl group to lysine at position 27 of the histone." [GOC:dph, GOC:tb]	7	2557	1	21118	0.000391083	0.142857	query_1	['GO:0031062', 'GO:0061085', 'GO:0070734']
1008	GO:BP	GO:0061086	negative regulation of histone H3-K27 methylation	1	FALSE	"Any process that decreases the rate, frequency, or extent of histone H3-K27 methylation. Histone H3-K27 methylation is the modification of histone H3 by addition of a methyl group to lysine at position 27 of the histone." [GOC:dph, GOC:tb]	5	2557	1	21118	0.000391083	0.2	query_1	['GO:0031061', 'GO:0061085', 'GO:0070734']
1009	GO:BP	GO:0061085	regulation of histone H3-K27 methylation	1	FALSE	"Any process that modulates the rate, frequency, or extent of histone H3-K27 methylation. Histone H3-K27 methylation is the modification of histone H3 by addition of a methyl group to lysine at position 27 of the histone." [GOC:dph, GOC:tb]	11	2557	1	21118	0.000391083	0.0909091	query_1	['GO:0031060', 'GO:0070734']
1010	GO:BP	GO:0048160	primary follicle stage	1	FALSE	"The stage in oogenesis when a single layer of cuboidal follicle cells surrounds the oocyte. The oocyte nucleus is large." [GOC:jid, GOC:mtg_sensu, ISBN:0198542771]	2	2557	1	21118	0.000391083	0.5	query_1	['GO:0022605']
1011	GO:BP	GO:0061082	myeloid leukocyte cytokine production	1	FALSE	"Any process that contributes to cytokine production by a myeloid cell." [GOC:dph]	28	2557	5	21118	0.00195542	0.178571	query_1	['GO:0002367']
1012	GO:BP	GO:0061081	positive regulation of myeloid leukocyte cytokine production involved in immune response	1	FALSE	"Any process that modulates the rate, frequency, or extent of the production of a cytokine that contributes to the immune response." [GOC:BHF, GOC:dph]	21	2557	3	21118	0.00117325	0.142857	query_1	['GO:0002720', 'GO:0061082']
1013	GO:BP	GO:0061078	positive regulation of prostaglandin secretion involved in immune response	1	FALSE	"Any process that activates or increases the frequency, rate or extent of the regulated release of a prostaglandin from a cell and contributes to the immune response." [GOC:BHF, GOC:dph]	1	2557	1	21118	0.000391083	1	query_1	['GO:0002702', 'GO:0032308', 'GO:0090323']
1014	GO:BP	GO:0061077	chaperone-mediated protein folding	1	FALSE	"The process of inhibiting aggregation and assisting in the covalent and noncovalent assembly of single chain polypeptides or multisubunit complexes into the correct tertiary structure that is dependent on interaction with a chaperone." [GOC:dph, GOC:vw]	58	2557	14	21118	0.00547517	0.241379	query_1	['GO:0006457']
1015	GO:BP	GO:0061179	negative regulation of insulin secretion involved in cellular response to glucose stimulus	1	FALSE	"Any process that decreases the frequency, rate or extent of the regulated release of insulin that contributes to the response of a cell to glucose." [GOC:BHF, GOC:dph]	23	2557	2	21118	0.000782167	0.0869565	query_1	['GO:0035773', 'GO:0046676', 'GO:0048585', 'GO:0061178']
1016	GO:BP	GO:0061072	iris morphogenesis	1	FALSE	"The process in which the iris is generated and organized. The iris is an anatomical structure in the eye whose opening forms the pupil. The iris is responsible for controlling the diameter and size of the pupil and the amount of light reaching the retina." [GOC:dph]	7	2557	1	21118	0.000391083	0.142857	query_1	['GO:0009653', 'GO:0048593']
1017	GO:BP	GO:0061180	mammary gland epithelium development	1	FALSE	"The process whose specific outcome is the progression of the mammary gland epithelium over time, from its formation to the mature structure. The mammary gland is a large compound sebaceous gland that in female mammals is modified to secrete milk." [GOC:dph, GOC:yaf]	73	2557	13	21118	0.00508408	0.178082	query_1	['GO:0030879', 'GO:0060429']
1018	GO:BP	GO:0048145	regulation of fibroblast proliferation	1	FALSE	"Any process that modulates the frequency, rate or extent of multiplication or reproduction of fibroblast cells." [GOC:jid]	102	2557	20	21118	0.00782167	0.196078	query_1	['GO:0042127', 'GO:0048144']
1019	GO:BP	GO:0061324	canonical Wnt signaling pathway involved in positive regulation of cardiac outflow tract cell proliferation	1	FALSE	"The canonical Wnt signaling pathway that contributes to the modulation of the expansion of a population of cardiac outflow tract cells." [GOC:dph, GOC:mtg_heart]	1	2557	1	21118	0.000391083	1	query_1	['GO:0044340', 'GO:0061316', 'GO:1901963']
1020	GO:BP	GO:0048087	positive regulation of developmental pigmentation	1	FALSE	"Any process that increases the frequency, rate or extent of the developmental process that results in the deposition of coloring matter in an organism." [GOC:dph, GOC:jid, GOC:tb]	8	2557	2	21118	0.000782167	0.25	query_1	['GO:0048066', 'GO:0048070', 'GO:0048518']
1021	GO:BP	GO:0048096	chromatin-mediated maintenance of transcription	1	FALSE	"Maintenance of transcription by remodelling of chromatin into an 'open configuration'. Once established, this regulation is mitotically stable and is maintained over many cell divisions. It is also heritable." [GOC:jid]	12	2557	4	21118	0.00156433	0.333333	query_1	['GO:0034401', 'GO:0045815', 'GO:0045893']
1022	GO:BP	GO:0048102	autophagic cell death	1	FALSE	"A form of programmed cell death that is accompanied by the formation of autophagosomes. Autophagic cell death is characterized by lack of chromatin condensation and massive vacuolization of the cytoplasm, with little or no uptake by phagocytic cells." [GOC:autophagy, GOC:mah, GOC:mtg_apoptosis, PMID:18846107, PMID:23347517]	15	2557	2	21118	0.000782167	0.133333	query_1	['GO:0012501']
1023	GO:BP	GO:0048103	somatic stem cell division	1	FALSE	"The self-renewing division of a somatic stem cell, a stem cell that can give rise to cell types of the body other than those of the germ-line." [GOC:jid, ISBN:0582227089]	14	2557	3	21118	0.00117325	0.214286	query_1	['GO:0017145']
1024	GO:BP	GO:0061323	cell proliferation involved in heart morphogenesis	1	FALSE	"The multiplication or reproduction of cells, resulting in the expansion of a cell population that contributes to the shaping of the heart." [GOC:dph, GOC:mtg_heart]	21	2557	3	21118	0.00117325	0.142857	query_1	['GO:0003007', 'GO:0008283']
1025	GO:BP	GO:0061318	renal filtration cell differentiation	1	FALSE	"The process in which a relatively unspecialized cell acquires specialized structural and/or functional features of a renal filtration cell. Renal filtration cells are specialized cells of the renal system that filter fluids by charge, size or both. Differentiation includes the processes involved in commitment of a cell to a specific fate and its subsequent development to the mature state." [GOC:…	20	2557	2	21118	0.000782167	0.1	query_1	['GO:0030154', 'GO:0072001']
1026	GO:BP	GO:0061317	canonical Wnt signaling pathway involved in cardiac muscle cell fate commitment	1	FALSE	"The series of molecular signals initiated by binding of a Wnt protein to a frizzled family receptor on the surface of the target cell, followed by propagation of the signal via beta-catenin, and ending with a change in transcription of target genes. In this pathway, the activated receptor signals via downstream effectors that result in the inhibition of beta-catenin phosphorylation, thereby prev…	5	2557	1	21118	0.000391083	0.2	query_1	['GO:0060923', 'GO:0061316']
1027	GO:BP	GO:0061316	canonical Wnt signaling pathway involved in heart development	1	FALSE	"The series of molecular signals initiated by binding of a Wnt protein to a frizzled family receptor on the surface of the target cell, followed by propagation of the signal via beta-catenin, and ending with a change in transcription of target genes that contributes to the progression of the heart over time. In this pathway, the activated receptor signals via downstream effectors that result in t…	6	2557	2	21118	0.000782167	0.333333	query_1	['GO:0003306', 'GO:0060070']
1028	GO:BP	GO:0061311	cell surface receptor signaling pathway involved in heart development	1	FALSE	"Any series of molecular signals initiated by the binding of a receptor on the surface of a cell to a physiological ligand, which contributes to the progression of the heart over time." [GOC:dph, GOC:mtg_heart, GOC:signaling]	30	2557	5	21118	0.00195542	0.166667	query_1	['GO:0007166', 'GO:0007507']
1029	GO:BP	GO:0061309	cardiac neural crest cell development involved in outflow tract morphogenesis	1	FALSE	"The process aimed at the progression of a cardiac neural crest cell over time, from initial commitment of the cell to its specific fate, to the fully functional differentiated cell that contributes to the shaping of the outflow tract." [GOC:dph, GOC:mtg_heart]	9	2557	3	21118	0.00117325	0.333333	query_1	['GO:0003151', 'GO:0061308']
1030	GO:BP	GO:0061308	cardiac neural crest cell development involved in heart development	1	FALSE	"The process aimed at the progression of a cardiac neural crest cell over time, from initial commitment of the cell to its specific fate, to the fully functional differentiated cell that contributes to the development of the heart." [GOC:dph, GOC:mtg_heart]	12	2557	3	21118	0.00117325	0.25	query_1	['GO:0014032', 'GO:0061307']
1031	GO:BP	GO:0061307	cardiac neural crest cell differentiation involved in heart development	1	FALSE	"The process in which a relatively unspecialized cell acquires specialized features of a cardiac neural crest cell that will migrate to the heart and contribute to its development. Cardiac neural crest cells are specialized cells that migrate toward the heart from the third, fourth and sixth pharyngeal arches." [GOC:dph, GOC:mtg_heart, PMID:19705442]	12	2557	3	21118	0.00117325	0.25	query_1	['GO:0014033', 'GO:0035051']
1032	GO:BP	GO:0061299	retina vasculature morphogenesis in camera-type eye	1	FALSE	"The process in which the vasculature of the retina is generated and organized." [GOC:BHF, GOC:dph]	10	2557	1	21118	0.000391083	0.1	query_1	['GO:0009653', 'GO:0061298']
1033	GO:BP	GO:0061298	retina vasculature development in camera-type eye	1	FALSE	"The process whose specific outcome is the progression of the vasculature of the retina over time, from its formation to the mature structure." [GOC:BHF, GOC:dph]	17	2557	1	21118	0.000391083	0.0588235	query_1	['GO:0001944', 'GO:0060041']
1034	GO:BP	GO:0061245	establishment or maintenance of bipolar cell polarity	1	FALSE	"Any cellular process that results in the specification, formation or maintenance of a bipolar intracellular organization or cell growth patterns." [GOC:dph, GOC:vw]	52	2557	10	21118	0.00391083	0.192308	query_1	['GO:0007163']
1035	GO:BP	GO:0061227	pattern specification involved in mesonephros development	1	FALSE	"Any developmental process that results in the creation of defined areas or spaces within the mesonephros to which cells respond and eventually are instructed to differentiate." [GOC:mtg_kidney_jan10]	2	2557	1	21118	0.000391083	0.5	query_1	['GO:0001823', 'GO:0061004']
1036	GO:BP	GO:0061205	paramesonephric duct development	1	FALSE	"The process whose specific outcome is the progression of the paramesonephric duct over time, from its formation to the mature structure. Mullerian ducts (or paramesonephric ducts) are paired ducts of the embryo that run down the lateral sides of the urogenital ridge and terminate at the mullerian eminence in the primitive urogenital sinus. In the female, they will develop to form the fallopian t…	4	2557	1	21118	0.000391083	0.25	query_1	['GO:0003006', 'GO:0035295']
1037	GO:BP	GO:0061198	fungiform papilla formation	1	FALSE	"The developmental process pertaining to the initial formation of a spongiform papilla from unspecified parts. The fungiform papilla is a mushroom-shaped papilla of the tongue." [GOC:dph]	3	2557	2	21118	0.000782167	0.666667	query_1	['GO:0048646', 'GO:0061197']
1038	GO:BP	GO:0061197	fungiform papilla morphogenesis	1	FALSE	"The process in which the anatomical structures of the fungiform papilla are generated and organized. The fungiform papilla is a mushroom-shaped papilla of the tongue." [GOC:dph]	5	2557	2	21118	0.000782167	0.4	query_1	['GO:0009653', 'GO:0043587', 'GO:0061196']
1039	GO:BP	GO:0061196	fungiform papilla development	1	FALSE	"The progression of the fungiform papilla over time, from its formation to the mature structure. The fungiform papilla is a mushroom-shaped papilla of the tongue." [GOC:dph]	6	2557	2	21118	0.000782167	0.333333	query_1	['GO:0043586', 'GO:0048856']
1040	GO:BP	GO:0048133	male germ-line stem cell asymmetric division	1	FALSE	"The self-renewing division of a germline stem cell in the male gonad, to produce a daughter stem cell and a daughter germ cell, which will divide to form the male gametes." [GOC:jid]	5	2557	2	21118	0.000782167	0.4	query_1	['GO:0007283', 'GO:0098728']
1041	GO:BP	GO:0061193	taste bud development	1	FALSE	"The progression of the taste bud over time, from its formation to the mature state. The taste bud is a specialized area of the tongue that contains taste receptors." [GOC:dph]	2	2557	1	21118	0.000391083	0.5	query_1	['GO:0007423', 'GO:0043586']
1042	GO:BP	GO:0061184	positive regulation of dermatome development	1	FALSE	"Any process that increases the rate, frequency, or extent of the progression of the dermatome over time, from its initial formation to the mature structure. The dermatome is the portion of a somite that will form skin." [GOC:BHF, GOC:dph]	3	2557	1	21118	0.000391083	0.333333	query_1	['GO:0040019', 'GO:0061054', 'GO:0061183']
1043	GO:BP	GO:0061183	regulation of dermatome development	1	FALSE	"Any process that modulates the rate, frequency, or extent of the progression of the dermatome over time, from its initial formation to the mature structure. The dermatome is the portion of a somite that will form skin." [GOC:BHF, GOC:dph]	4	2557	1	21118	0.000391083	0.25	query_1	['GO:0050793', 'GO:0061054']
1044	GO:BP	GO:0048143	astrocyte activation	1	FALSE	"A change in morphology and behavior of an astrocyte resulting from exposure to a cytokine, chemokine, cellular ligand, or soluble factor." [GOC:mgi_curators, PMID:10526094, PMID:10695728, PMID:12529254, PMID:12580336, PMID:9585813]	22	2557	2	21118	0.000782167	0.0909091	query_1	['GO:0001775', 'GO:0014002']
1045	GO:BP	GO:0048144	fibroblast proliferation	1	FALSE	"The multiplication or reproduction of fibroblast cells, resulting in the expansion of the fibroblast population." [GOC:jid]	104	2557	21	21118	0.00821275	0.201923	query_1	['GO:0008283']
1046	GO:BP	GO:0061181	regulation of chondrocyte development	1	FALSE	"Any process that modulates the rate, frequency, or extent of the process whose specific outcome is the progression of a chondrocyte over time, from its commitment to its mature state. Chondrocyte development does not include the steps involved in committing a chondroblast to a chondrocyte fate." [GOC:BHF, GOC:dph]	5	2557	1	21118	0.000391083	0.2	query_1	['GO:0002063', 'GO:0032330', 'GO:0060284']
1047	GO:BP	GO:0061325	cell proliferation involved in outflow tract morphogenesis	1	FALSE	"The multiplication or reproduction of cells, resulting in the expansion of a cell population that contributes to the shaping of the outflow tract." [GOC:dph, GOC:mtg_heart]	4	2557	3	21118	0.00117325	0.75	query_1	['GO:0003151', 'GO:0061323']
1048	GO:BP	GO:0048165	fused antrum stage	1	FALSE	"The stage in oogenesis when the antral spaces fuse to form a single antral space. The oocyte is suspended in the cumulus oophorous and the first polar body in the perivitelline space." [GOC:jid, GOC:mtg_sensu, ISBN:0198542771]	3	2557	1	21118	0.000391083	0.333333	query_1	['GO:0022605']
1049	GO:BP	GO:0061054	dermatome development	1	FALSE	"The progression of the dermatome over time, from its initial formation to the mature structure. The dermatome is the portion of a somite that will form skin." [GOC:dph]	4	2557	1	21118	0.000391083	0.25	query_1	['GO:0048856', 'GO:0061053']
1050	GO:BP	GO:0061004	pattern specification involved in kidney development	1	FALSE	"Any developmental process that results in the creation of defined areas or spaces within the kidney to which cells respond and eventually are instructed to differentiate." [GOC:dph, GOC:mtg_kidney_jan10]	8	2557	3	21118	0.00117325	0.375	query_1	['GO:0001822', 'GO:0007389', 'GO:0072048']
1051	GO:BP	GO:0061003	positive regulation of dendritic spine morphogenesis	1	FALSE	"Any process that increases the rate, frequency, or extent of dendritic spine morphogenesis, the process in which the anatomical structures of a dendritic spine are generated and organized. A dendritic spine is a protrusion from a dendrite and a specialized subcellular compartment involved in synaptic transmission." [GOC:dph]	27	2557	6	21118	0.0023465	0.222222	query_1	['GO:0010976', 'GO:0050775', 'GO:0060997', 'GO:0060999', 'GO:0061001']
1052	GO:BP	GO:0061001	regulation of dendritic spine morphogenesis	1	FALSE	"Any process that modulates the rate, frequency, or extent of dendritic spine morphogenesis, the process in which the anatomical structures of a dendritic spine are generated and organized. A dendritic spine is a protrusion from a dendrite and a specialized subcellular compartment involved in synaptic transmission." [GOC:dph]	56	2557	8	21118	0.00312867	0.142857	query_1	['GO:0010975', 'GO:0022603', 'GO:0060997', 'GO:0099175']
1053	GO:BP	GO:0061000	negative regulation of dendritic spine development	1	FALSE	"Any process that decreases the rate, frequency, or extent of dendritic spine development, the process whose specific outcome is the progression of the dendritic spine over time, from its formation to the mature structure." [GOC:dph]	17	2557	3	21118	0.00117325	0.176471	query_1	['GO:0051093', 'GO:0060996', 'GO:0060998']
1054	GO:BP	GO:0060999	positive regulation of dendritic spine development	1	FALSE	"Any process that increases the rate, frequency, or extent of dendritic spine development, the process whose specific outcome is the progression of the dendritic spine over time, from its formation to the mature structure." [GOC:dph]	59	2557	12	21118	0.004693	0.20339	query_1	['GO:0051094', 'GO:0060996', 'GO:0060998']
1055	GO:BP	GO:0048200	Golgi transport vesicle coating	1	FALSE	"The addition of specific coat proteins to Golgi membranes during the formation of transport vesicles." [GOC:jid, GOC:mah, ISBN:0716731363, PMID:10219233]	4	2557	3	21118	0.00117325	0.75	query_1	['GO:0006901', 'GO:0048194', 'GO:0048199']
1056	GO:BP	GO:0060998	regulation of dendritic spine development	1	FALSE	"Any process that modulates the rate, frequency, or extent of dendritic spine development, the process whose specific outcome is the progression of the dendritic spine over time, from its formation to the mature structure." [GOC:dph]	80	2557	17	21118	0.00664842	0.2125	query_1	['GO:0050793', 'GO:0060996']
1057	GO:BP	GO:0060997	dendritic spine morphogenesis	1	FALSE	"The process in which the anatomical structures of a dendritic spine are generated and organized. A dendritic spine is a protrusion from a dendrite and a specialized subcellular compartment involved in synaptic transmission." [GOC:dph]	72	2557	10	21118	0.00391083	0.138889	query_1	['GO:0031175', 'GO:0048812', 'GO:0048813', 'GO:0060996', 'GO:0097061']
1058	GO:BP	GO:0060996	dendritic spine development	1	FALSE	"The process whose specific outcome is the progression of the dendritic spine over time, from its formation to the mature structure. A dendritic spine is a protrusion from a dendrite and a specialized subcellular compartment involved in synaptic transmission." [GOC:dph]	123	2557	20	21118	0.00782167	0.162602	query_1	['GO:0016358', 'GO:0048856']
1059	GO:BP	GO:0060993	kidney morphogenesis	1	FALSE	"Morphogenesis of a kidney. A kidney is an organ that filters the blood and excretes the end products of body metabolism in the form of urine." [GOC:dph, GOC:mtg_kidney_jan10]	96	2557	15	21118	0.00586625	0.15625	query_1	['GO:0001822', 'GO:0009887']
1060	GO:BP	GO:0060986	endocrine hormone secretion	1	FALSE	"The regulated release of a hormone into the circulatory system." [GOC:dph]	60	2557	8	21118	0.00312867	0.133333	query_1	['GO:0046879', 'GO:0050886']
1061	GO:BP	GO:0060983	epicardium-derived cardiac vascular smooth muscle cell differentiation	1	FALSE	"The process in which a relatively unspecialized cell derived from the epicardium acquires specialized features of a cardiac vascular smooth muscle cell. A cardiac vascular smooth muscle cell covers the heart vasculature and lacks transverse striations in its constituent fibers." [GOC:mtg_heart]	2	2557	2	21118	0.000782167	1	query_1	['GO:0060947']
1062	GO:BP	GO:0060982	coronary artery morphogenesis	1	FALSE	"The process in which the anatomical structures of coronary arteries are generated and organized. Coronary arteries are blood vessels that transport blood to the heart muscle." [GOC:mtg_heart]	9	2557	3	21118	0.00117325	0.333333	query_1	['GO:0048844', 'GO:0060977']
1063	GO:BP	GO:0060979	vasculogenesis involved in coronary vascular morphogenesis	1	FALSE	"The differentiation of endothelial cells from progenitor cells that contributes to blood vessel development in the heart, and the de novo formation of blood vessels and tubes." [GOC:mtg_heart]	14	2557	1	21118	0.000391083	0.0714286	query_1	['GO:0001570', 'GO:0060977']
1064	GO:BP	GO:0048205	COPI coating of Golgi vesicle	1	FALSE	"The addition of COPI proteins and adaptor proteins to Golgi membranes during the formation of transport vesicles, forming a vesicle coat." [GOC:jid, GOC:mah, ISBN:0716731363, PMID:10219233]	4	2557	3	21118	0.00117325	0.75	query_1	['GO:0035964', 'GO:0048200']
1065	GO:BP	GO:0060977	coronary vasculature morphogenesis	1	FALSE	"The process in which the anatomical structures of blood vessels of the heart are generated and organized. The blood vessel is the vasculature carrying blood." [GOC:mtg_heart]	29	2557	5	21118	0.00195542	0.172414	query_1	['GO:0048514', 'GO:0060976']
1066	GO:BP	GO:0060976	coronary vasculature development	1	FALSE	"The process whose specific outcome is the progression of the blood vessels of the heart over time, from its formation to the mature structure." [GOC:mtg_heart]	70	2557	13	21118	0.00508408	0.185714	query_1	['GO:0001568', 'GO:0007507']
1067	GO:BP	GO:0060973	cell migration involved in heart development	1	FALSE	"The orderly movement of a cell from one site to another that will contribute to the progression of the heart over time, from its initial formation, to the mature organ." [GOC:mtg_heart]	17	2557	4	21118	0.00156433	0.235294	query_1	['GO:0007507', 'GO:0016477']
1068	GO:BP	GO:0060972	left/right pattern formation	1	FALSE	"The pattern specification process that results in the subdivision of the left/right axis in space to define an area or volume in which specific patterns of cell differentiation will take place or in which cells interpret a specific environment." [GOC:mtg_heart]	22	2557	3	21118	0.00117325	0.136364	query_1	['GO:0003002']
1069	GO:BP	GO:0060971	embryonic heart tube left/right pattern formation	1	FALSE	"The pattern specification process that results in the subdivision of the left/right axis of the embryonic heart tube in space to define an area or volume in which specific patterns of cell differentiation will take place." [GOC:mtg_heart]	6	2557	1	21118	0.000391083	0.166667	query_1	['GO:0035050', 'GO:0060972']
1070	GO:BP	GO:0060969	negative regulation of gene silencing	1	FALSE	"Any process that decreases the rate, frequency, or extent of gene silencing, the transcriptional or post-transcriptional process carried out at the cellular level that results in long-term gene inactivation." [GOC:dph, GOC:tb]	31	2557	4	21118	0.00156433	0.129032	query_1	['GO:0010628', 'GO:0016458', 'GO:0048523', 'GO:0060968']
1071	GO:BP	GO:0060968	regulation of gene silencing	1	FALSE	"Any process that modulates the rate, frequency, or extent of gene silencing, the transcriptional or post-transcriptional process carried out at the cellular level that results in long-term gene inactivation." [GOC:dph, GOC:tb]	76	2557	11	21118	0.00430192	0.144737	query_1	['GO:0010468', 'GO:0016458', 'GO:0050794']
1072	GO:BP	GO:0060967	negative regulation of gene silencing by RNA	1	FALSE	"Any process that decreases the rate, frequency, or extent of gene silencing by RNA. Gene silencing by RNA is the process in which RNA molecules inactivate expression of target genes." [GOC:dph, GOC:tb]	20	2557	2	21118	0.000782167	0.1	query_1	['GO:0031047', 'GO:0060966', 'GO:0060969']
1073	GO:BP	GO:0060966	regulation of gene silencing by RNA	1	FALSE	"Any process that regulates the rate, frequency, or extent of gene silencing by RNA. Gene silencing by RNA is the process in which RNA molecules inactivate expression of target genes." [GOC:dph, GOC:tb]	48	2557	6	21118	0.0023465	0.125	query_1	['GO:0031047', 'GO:0060968']
1074	GO:BP	GO:0060965	negative regulation of gene silencing by miRNA	1	FALSE	"Any process that decreases the rate, frequency, or extent of gene silencing by miRNA." [GOC:aruk, GOC:bc, GOC:dph, GOC:rl, GOC:tb, PMID:23985560, PMID:28379604]	18	2557	2	21118	0.000782167	0.111111	query_1	['GO:0035195', 'GO:0060149', 'GO:0060964', 'GO:0060967']
1075	GO:BP	GO:0060964	regulation of gene silencing by miRNA	1	FALSE	"Any process that modulates the rate, frequency, or extent of the downregulation of gene expression through the action of microRNAs (miRNAs), endogenous 21-24 nucleotide small RNAs processed from stem-loop RNA precursors (pre-miRNAs). Once incorporated into a RNA-induced silencing complex (RISC), miRNAs can downregulate gene expression by either of two posttranscriptional mechanisms: RNA (often m…	44	2557	6	21118	0.0023465	0.136364	query_1	['GO:0035195', 'GO:0060147', 'GO:0060966']
1076	GO:BP	GO:0048207	vesicle targeting, rough ER to cis-Golgi	1	FALSE	"The process in which vesicles are directed to specific destination membranes during transport from the rough endoplasmic reticulum to the cis-Golgi." [GOC:jid, GOC:mah, ISBN:0716731363, PMID:10219233]	10	2557	2	21118	0.000782167	0.2	query_1	['GO:0006888', 'GO:0048199']
1077	GO:BP	GO:0061005	cell differentiation involved in kidney development	1	FALSE	"The process in which relatively unspecialized cells acquire specialized structural and/or functional features that characterize the cells of the kidney as it progresses from its formation to the mature state." [GOC:mtg_kidney_jan10]	55	2557	10	21118	0.00391083	0.181818	query_1	['GO:0001822', 'GO:0030154']
1078	GO:BP	GO:0048167	regulation of synaptic plasticity	1	FALSE	"A process that modulates synaptic plasticity, the ability of synapses to change as circumstances require. They may alter function, such as increasing or decreasing their sensitivity, or they may increase or decrease in actual numbers." [GOC:dph, GOC:jid, GOC:tb, PMID:11891290]	214	2557	23	21118	0.00899492	0.107477	query_1	['GO:0050804', 'GO:0065008']
1079	GO:BP	GO:0061008	hepaticobiliary system development	1	FALSE	"The progression of the hepaticobiliary system over time, from its formation to the mature structure. The hepaticobiliary system is responsible for metabolic and catabolic processing of small molecules absorbed from the blood or gut, hormones and serum proteins, detoxification, storage of glycogen, triglycerides, metals and lipid soluble vitamins and excretion of bile. Included are the synthesis …	176	2557	25	21118	0.00977708	0.142045	query_1	['GO:0048731']
1080	GO:BP	GO:0061014	positive regulation of mRNA catabolic process	1	FALSE	"Any process that increases the rate, frequency, or extent of a mRNA catabolic process, the chemical reactions and pathways resulting in the breakdown of RNA, ribonucleic acid, one of the two main type of nucleic acid, consisting of a long, unbranched macromolecule formed from ribonucleotides joined in 3',5'-phosphodiester linkage." [GOC:ascb_2009, GOC:dph, GOC:tb]	77	2557	15	21118	0.00586625	0.194805	query_1	['GO:0006402', 'GO:0031331', 'GO:0061013', 'GO:1903313']
1081	GO:BP	GO:0061053	somite development	1	FALSE	"The progression of a somite from its initial formation to the mature structure. Somites are mesodermal clusters that are arranged segmentally along the anterior posterior axis of an embryo." [GOC:dph]	91	2557	10	21118	0.00391083	0.10989	query_1	['GO:0009790', 'GO:0060429']
1082	GO:BP	GO:0061052	negative regulation of cell growth involved in cardiac muscle cell development	1	FALSE	"Any process that decreases the rate, frequency, or extent of the growth of a cardiac muscle cell, where growth contributes to the progression of the cell over time from its initial formation to its mature state." [GOC:dph]	16	2557	2	21118	0.000782167	0.125	query_1	['GO:0010614', 'GO:0030308', 'GO:0051154', 'GO:0055022', 'GO:0061049', 'GO:0061050']
1083	GO:BP	GO:0061051	positive regulation of cell growth involved in cardiac muscle cell development	1	FALSE	"Any process that increases the rate, frequency, or extent of the growth of a cardiac muscle cell, where growth contributes to the progression of the cell over time from its initial formation to its mature state." [GOC:dph]	17	2557	7	21118	0.00273758	0.411765	query_1	['GO:0010613', 'GO:0030307', 'GO:0051155', 'GO:0055023', 'GO:0061049', 'GO:0061050']
1084	GO:BP	GO:0061050	regulation of cell growth involved in cardiac muscle cell development	1	FALSE	"Any process that modulates the rate, frequency, or extent of the growth of a cardiac muscle cell, where growth contributes to the progression of the cell over time from its initial formation to its mature state." [GOC:dph]	32	2557	9	21118	0.00351975	0.28125	query_1	['GO:0001558', 'GO:0055021', 'GO:0061049']
1085	GO:BP	GO:0061049	cell growth involved in cardiac muscle cell development	1	FALSE	"The growth of a cardiac muscle cell, where growth contributes to the progression of the cell over time from its initial formation to its mature state." [GOC:dph]	46	2557	11	21118	0.00430192	0.23913	query_1	['GO:0003301', 'GO:0048588', 'GO:0055013']
1086	GO:BP	GO:0048168	regulation of neuronal synaptic plasticity	1	FALSE	"A process that modulates neuronal synaptic plasticity, the ability of neuronal synapses to change as circumstances require. They may alter function, such as increasing or decreasing their sensitivity, or they may increase or decrease in actual numbers." [GOC:jid, PMID:11891290]	63	2557	4	21118	0.00156433	0.0634921	query_1	['GO:0048167']
1087	GO:BP	GO:0048169	regulation of long-term neuronal synaptic plasticity	1	FALSE	"A process that modulates long-term neuronal synaptic plasticity, the ability of neuronal synapses to change long-term as circumstances require. Long-term neuronal synaptic plasticity generally involves increase or decrease in actual synapse numbers." [GOC:jid, PMID:11891290]	30	2557	2	21118	0.000782167	0.0666667	query_1	['GO:0048168']
1088	GO:BP	GO:0061047	positive regulation of branching involved in lung morphogenesis	1	FALSE	"Any process that increases the rate, frequency, or extent of the process in which a highly ordered sequence of patterning events generates the branched structures of the lung, consisting of reiterated combinations of bud outgrowth, elongation, and dichotomous subdivision of terminal units." [GOC:dph, GOC:yaf]	3	2557	1	21118	0.000391083	0.333333	query_1	['GO:0051240', 'GO:0060441', 'GO:0061046', 'GO:1905332']
1089	GO:BP	GO:0048170	positive regulation of long-term neuronal synaptic plasticity	1	FALSE	"A process that increases long-term neuronal synaptic plasticity, the ability of neuronal synapses to change long-term as circumstances require. Long-term neuronal synaptic plasticity generally involves increase or decrease in actual synapse numbers." [GOC:jid, PMID:11891290]	7	2557	1	21118	0.000391083	0.142857	query_1	['GO:0048169', 'GO:0050769']
1090	GO:BP	GO:0048172	regulation of short-term neuronal synaptic plasticity	1	FALSE	"A process that modulates short-term neuronal synaptic plasticity, the ability of neuronal synapses to change in the short-term as circumstances require. Short-term neuronal synaptic plasticity generally involves increasing or decreasing synaptic sensitivity." [GOC:jid, PMID:11891290]	19	2557	2	21118	0.000782167	0.105263	query_1	['GO:0048168']
1091	GO:BP	GO:0061046	regulation of branching involved in lung morphogenesis	1	FALSE	"Any process that modulates the rate, frequency, or extent of the process in which a highly ordered sequence of patterning events generates the branched structures of the lung, consisting of reiterated combinations of bud outgrowth, elongation, and dichotomous subdivision of terminal units." [GOC:dph, GOC:yaf]	7	2557	1	21118	0.000391083	0.142857	query_1	['GO:0060441', 'GO:0060688', 'GO:1905330']
1092	GO:BP	GO:0061045	negative regulation of wound healing	1	FALSE	"Any process that decreases the rate, frequency, or extent of the series of events that restore integrity to a damaged tissue, following an injury." [GOC:dph]	68	2557	12	21118	0.004693	0.176471	query_1	['GO:0032102', 'GO:0042060', 'GO:0061041', 'GO:1903035']
1093	GO:BP	GO:0048193	Golgi vesicle transport	1	FALSE	"The directed movement of substances into, out of or within the Golgi apparatus, mediated by vesicles." [GOC:jid, ISBN:0716731363, PMID:10219233]	265	2557	49	21118	0.0191631	0.184906	query_1	['GO:0016192']
1094	GO:BP	GO:0061042	vascular wound healing	1	FALSE	"Blood vessel formation when new vessels emerge from the proliferation of pre-existing blood vessels and contribute to the series of events that restore integrity to damaged vasculature." [GOC:BHF, GOC:dph]	17	2557	2	21118	0.000782167	0.117647	query_1	['GO:0060055']
1095	GO:BP	GO:0061041	regulation of wound healing	1	FALSE	"Any process that modulates the rate, frequency, or extent of the series of events that restore integrity to a damaged tissue, following an injury." [GOC:BHF, GOC:dph]	126	2557	22	21118	0.00860383	0.174603	query_1	['GO:0042060', 'GO:1903034']
1096	GO:BP	GO:0061037	negative regulation of cartilage development	1	FALSE	"Any process that decreases the rate, frequency, or extent of cartilage development, the process whose specific outcome is the progression of the cartilage over time, from its formation to the mature structure. Cartilage is a connective tissue dominated by extracellular matrix containing collagen type II and large amounts of proteoglycan, particularly chondroitin sulfate." [GOC:dph]	29	2557	5	21118	0.00195542	0.172414	query_1	['GO:0051093', 'GO:0051216', 'GO:0051241', 'GO:0061035']
1097	GO:BP	GO:0061036	positive regulation of cartilage development	1	FALSE	"Any process that increases the rate, frequency, or extent of cartilage development, the process whose specific outcome is the progression of the cartilage over time, from its formation to the mature structure. Cartilage is a connective tissue dominated by extracellular matrix containing collagen type II and large amounts of proteoglycan, particularly chondroitin sulfate." [GOC:dph]	33	2557	5	21118	0.00195542	0.151515	query_1	['GO:0051094', 'GO:0051216', 'GO:0051240', 'GO:0061035']
1098	GO:BP	GO:0061035	regulation of cartilage development	1	FALSE	"Any process that modulates the rate, frequency, or extent of cartilage development, the process whose specific outcome is the progression of the cartilage over time, from its formation to the mature structure. Cartilage is a connective tissue dominated by extracellular matrix containing collagen type II and large amounts of proteoglycan, particularly chondroitin sulfate." [GOC:dph]	71	2557	15	21118	0.00586625	0.211268	query_1	['GO:0051216', 'GO:2000026']
1099	GO:BP	GO:0048194	Golgi vesicle budding	1	FALSE	"The evagination of the Golgi membrane, resulting in formation of a vesicle." [GOC:jid, ISBN:0716731363, PMID:10219233]	7	2557	3	21118	0.00117325	0.428571	query_1	['GO:0006900', 'GO:0048193']
1100	GO:BP	GO:0061034	olfactory bulb mitral cell layer development	1	FALSE	"The progression of the olfactory bulb mitral cell layer over time from its initial formation until its mature state. The mitral cell layer is composed of pyramidal neurons whose cell bodies are located between the granule cell layer and the plexiform layer." [GOC:dph]	3	2557	1	21118	0.000391083	0.333333	query_1	['GO:0021772', 'GO:0048856']
1101	GO:BP	GO:0061032	visceral serous pericardium development	1	FALSE	"The progression of the visceral serous pericardium from its formation to the mature structure. The visceral serous pericardium is the inner layer of the pericardium." [GOC:dph, GOC:yaf]	6	2557	1	21118	0.000391083	0.166667	query_1	['GO:0048856', 'GO:0060039']
1102	GO:BP	GO:0061031	endodermal digestive tract morphogenesis	1	FALSE	"The process in which the anatomical structures of the endodermal digestive tract are generated and organized. The endodermal digestive tract includes those portions of the digestive tract that are derived from endoderm." [GOC:dph, GOC:yaf]	3	2557	2	21118	0.000782167	0.666667	query_1	['GO:0048546']
1103	GO:BP	GO:0061030	epithelial cell differentiation involved in mammary gland alveolus development	1	FALSE	"The process in which a relatively unspecialized epithelial cell becomes a more specialized epithelial cell of the mammary gland alveolus." [GOC:dph, GOC:yaf]	4	2557	1	21118	0.000391083	0.25	query_1	['GO:0060644', 'GO:0060749']
1104	GO:BP	GO:0061029	eyelid development in camera-type eye	1	FALSE	"The progression of the eyelid in a camera-type eye from its formation to the mature state. The eyelid is a membranous cover that helps protect and lubricate the eye." [GOC:dph, GOC:yaf]	11	2557	3	21118	0.00117325	0.272727	query_1	['GO:0043010', 'GO:0048856']
1105	GO:BP	GO:0061028	establishment of endothelial barrier	1	FALSE	"The establishment of a barrier between endothelial cell layers, such as those in the brain, lung or intestine, to exert specific and selective control over the passage of water and solutes, thus allowing formation and maintenance of compartments that differ in fluid and solute composition." [GOC:dph]	52	2557	7	21118	0.00273758	0.134615	query_1	['GO:0001885']
1106	GO:BP	GO:0061025	membrane fusion	1	FALSE	"The membrane organization process that joins two lipid bilayers to form a single membrane." [GOC:dph, GOC:tb]	155	2557	28	21118	0.0109503	0.180645	query_1	['GO:0061024']
1107	GO:BP	GO:0061015	snRNA import into nucleus	1	FALSE	"The directed movement of snRNA, small nuclear ribonucleic acid into the nucleus." [GOC:ascb_2009, GOC:dph, GOC:tb]	2	2557	1	21118	0.000391083	0.5	query_1	['GO:0006404', 'GO:0051030']
1108	GO:BP	GO:0048199	vesicle targeting, to, from or within Golgi	1	FALSE	"The process in which vesicles are directed to specific destination membranes during transport to, from or within the Golgi apparatus; mediated by the addition of specific coat proteins, including COPI and COPII proteins and clathrin, to the membrane during vesicle formation." [GOC:jid, GOC:mah, ISBN:0716731363, PMID:10219233]	20	2557	7	21118	0.00273758	0.35	query_1	['GO:0006903', 'GO:0048193']
1109	GO:BP	GO:0061326	renal tubule development	1	FALSE	"The progression of the renal tubule over time from its formation to the mature form. A renal tubule is a tube that filters, re-absorbs and secretes substances to rid an organism of waste and to play a role in fluid homeostasis." [GOC:dph, GOC:mtg_kidney_jan10]	98	2557	16	21118	0.00625733	0.163265	query_1	['GO:0035295', 'GO:0060429', 'GO:0072001']
1110	GO:BP	GO:0061333	renal tubule morphogenesis	1	FALSE	"The process in which the renal tubule is generated by specification of cell fate, through the maintenance of cell polarity, regulated cell proliferation and morphogenetic cell rearrangements, shape changes and growth. A renal tubule is a tube that filters, re-absorbs and secretes substances to rid an organism of waste and to play a role in fluid homeostasis." [GOC:dph, GOC:mtg_kidney_jan10]	78	2557	14	21118	0.00547517	0.179487	query_1	['GO:0060562', 'GO:0061326']
1111	GO:BP	GO:0061337	cardiac conduction	1	FALSE	"Transfer of an organized electrical impulse across the heart to coordinate the contraction of cardiac muscles. The process begins with generation of an action potential (in the sinoatrial node (SA) in humans) and ends with a change in the rate, frequency, or extent of the contraction of the heart muscles." [GOC:dph]	70	2557	5	21118	0.00195542	0.0714286	query_1	['GO:0008016', 'GO:0035637']
1112	GO:BP	GO:0061880	regulation of anterograde axonal transport of mitochondrion	1	FALSE	"Any process that modulates the frequency, rate or extent of the directed movement of mitochondria along microtubules in axons away from the cell body and towards the presynapse." [PMID:24302729]	1	2557	1	21118	0.000391083	1	query_1	['GO:0098957', 'GO:1902513']
1113	GO:BP	GO:0061857	endoplasmic reticulum stress-induced pre-emptive quality control	1	FALSE	"The response to endoplasimic reticulum stress in which nascent proteins are degraded by attenuation of their translocation into the ER followed by rerouting to the cytosol without cleavage of the signal peptide, and subsequent degradation by the proteasome." [PMID:17129784, PMID:26565908]	2	2557	1	21118	0.000391083	0.5	query_1	['GO:0034976']
1114	GO:BP	GO:0061844	antimicrobial humoral immune response mediated by antimicrobial peptide	1	FALSE	"An immune response against microbes mediated by anti-microbial peptides in body fluid." [PMID:15761415, PMID:24287494]	111	2557	5	21118	0.00195542	0.045045	query_1	['GO:0019730']
1115	GO:BP	GO:0061843	Sertoli cell barrier remodeling	1	FALSE	"The tissue remodeling process by which the Sertoli cell barrier is temporarily disrupted and reorganized to accommodate the transit of preleptotene spermatocytes at stage VIII of the epithelial cycle." [PMID:20534520, PMID:24467744]	1	2557	1	21118	0.000391083	1	query_1	['GO:0048771']
1116	GO:BP	GO:0048008	platelet-derived growth factor receptor signaling pathway	1	FALSE	"The series of molecular signals generated as a consequence of a platelet-derived growth factor receptor binding to one of its physiological ligands." [GOC:ceb]	60	2557	7	21118	0.00273758	0.116667	query_1	['GO:0007169']
1117	GO:BP	GO:0070670	response to interleukin-4	1	FALSE	"Any process that results in a change in state or activity of a cell or an organism (in terms of movement, secretion, enzyme production, gene expression, etc.) as a result of an interleukin-4 stimulus." [GOC:mah]	33	2557	7	21118	0.00273758	0.212121	query_1	['GO:0034097']
1118	GO:BP	GO:0048009	insulin-like growth factor receptor signaling pathway	1	FALSE	"The series of molecular signals generated as a consequence of the insulin-like growth factor receptor binding to one of its physiological ligands." [GOC:ceb]	33	2557	2	21118	0.000782167	0.0606061	query_1	['GO:0007169']
1119	GO:BP	GO:0048010	vascular endothelial growth factor receptor signaling pathway	1	FALSE	"Any series of molecular signals initiated by the binding of an extracellular ligand to a vascular endothelial growth factor receptor (VEGFR) located on the surface of the receiving cell, and ending with regulation of a downstream cellular process, e.g. transcription." [GOC:ceb, GOC:signaling]	48	2557	3	21118	0.00117325	0.0625	query_1	['GO:0007169']
1120	GO:BP	GO:0048011	neurotrophin TRK receptor signaling pathway	1	FALSE	"A series of molecular signals initiated by the binding of a neurotrophin to a receptor on the surface of the target cell where the receptor possesses tyrosine kinase activity, and ending with regulation of a downstream cellular process, e.g. transcription." [GOC:bf, GOC:ceb, GOC:jc, GOC:signaling, PMID:12065629, Wikipedia:Trk_receptor]	31	2557	6	21118	0.0023465	0.193548	query_1	['GO:0007169', 'GO:0038179']
1121	GO:BP	GO:0048012	hepatocyte growth factor receptor signaling pathway	1	FALSE	"The series of molecular signals generated as a consequence of the hepatocyte growth factor receptor binding to one of its physiological ligands." [GOC:ceb]	12	2557	2	21118	0.000782167	0.166667	query_1	['GO:0007169']
1122	GO:BP	GO:0048013	ephrin receptor signaling pathway	1	FALSE	"The series of molecular signals generated as a consequence of an ephrin receptor binding to an ephrin." [GOC:ceb]	38	2557	4	21118	0.00156433	0.105263	query_1	['GO:0007169']
1123	GO:BP	GO:0048015	phosphatidylinositol-mediated signaling	1	FALSE	"A series of molecular signals in which a cell uses a phosphatidylinositol-mediated signaling to convert a signal into a response. Phosphatidylinositols include phosphatidylinositol (PtdIns) and its phosphorylated derivatives." [GOC:bf, GOC:ceb, ISBN:0198506732]	162	2557	11	21118	0.00430192	0.0679012	query_1	['GO:0048017']
1124	GO:BP	GO:0048016	inositol phosphate-mediated signaling	1	FALSE	"Any intracellular signal transduction in which the signal is passed on within the cell via an inositol phosphate. Includes production of the inositol phosphate, and downstream effectors that further transmit the signal within the cell. Inositol phosphates are a group of mono- to poly-phosphorylated inositols, and include inositol monophosphate (IP), inositol trisphosphate (IP3), inositol pentaki…	55	2557	5	21118	0.00195542	0.0909091	query_1	['GO:0019932']
1125	GO:BP	GO:0048017	inositol lipid-mediated signaling	1	FALSE	"A series of molecular signals in which a cell uses an inositol-containing lipid to convert a signal into a response. Inositol lipids include the phosphoinositides (phosphatidylinositol and its phosphorylated derivatives), ceramides containing inositol, and inositol glycolipids." [GOC:bf, GOC:ceb, PMID:16088939]	165	2557	11	21118	0.00430192	0.0666667	query_1	['GO:0035556']
1126	GO:BP	GO:0048021	regulation of melanin biosynthetic process	1	FALSE	"Any process that alters the frequency, rate or extent of the chemical reactions and pathways resulting in the formation of melanin." [GOC:jid]	14	2557	4	21118	0.00156433	0.285714	query_1	['GO:0031326', 'GO:0042438', 'GO:1900376']
1127	GO:BP	GO:0061820	telomeric D-loop disassembly	1	FALSE	"A telomere loop disassembly process that results in the disassembly of telomeric D-loops. A telomeric D-loop is a three-stranded DNA displacement loop that forms at the site where the telomeric 3' single-stranded DNA overhang (formed of the repeat sequence TTAGGG in mammals) is tucked back inside the double-stranded component of telomeric DNA molecule, thus forming a t-loop or telomeric-loop and…	8	2557	2	21118	0.000782167	0.25	query_1	['GO:0090657']
1128	GO:BP	GO:0061819	telomeric DNA-containing double minutes formation	1	FALSE	"A telomere maintenance process that results in the formation of small fragments of circular extrachromosomal DNA elements which contain telomeric DNA. It is speculated that telomeric DNA-containing double minutes are formed through a recombination event between the telomere and chromosome-internal TTAGGG-like sequences. Telomeric DNA-containing double minutes appear as two closely positioned dot…	3	2557	1	21118	0.000391083	0.333333	query_1	['GO:0000722']
1129	GO:BP	GO:0061763	multivesicular body-lysosome fusion	1	FALSE	"The organelle membrane fusion process in which the membrane of a multivesicular body fuses with a lysosome to create a hybrid organelle." [GOC:dph, GOC:pad, GOC:PARL, PMID:21118109]	2	2557	1	21118	0.000391083	0.5	query_1	['GO:0006906', 'GO:0032510', 'GO:0097212']
1130	GO:BP	GO:0061762	CAMKK-AMPK signaling cascade	1	FALSE	"A series of molecular signals in which calmodulin-dependent protein kinase activity enabled by a CAMKK directly activates an AMPK. The cascade begins with calmodulin binding calcium which in turn binds CAMKK enabling its calmodulin-dependent protein kinase activity. The cascade ends with AMP-activated protein kinase activity." [GOC:dph, GOC:pad, GOC:PARL, PMID:23010169, PMID:24709372]	8	2557	1	21118	0.000391083	0.125	query_1	['GO:0019722', 'GO:0099004']
1131	GO:BP	GO:0061756	leukocyte adhesion to vascular endothelial cell	1	FALSE	"The attachment of a leukocyte to vascular endothelial cell via adhesion molecules." [GOC:add, GOC:bc, GOC:BHF, GOC:BHF_miRNA, PMID:23897866]	43	2557	5	21118	0.00195542	0.116279	query_1	['GO:0007159']
1132	GO:BP	GO:0061744	motor behavior	1	FALSE	"The specific neuromuscular movement of a single organism in response to external or internal stimuli." [GOC:bf, GOC:PARL, PMID:25318560]	15	2557	3	21118	0.00117325	0.2	query_1	['GO:0007610']
1133	GO:BP	GO:0061743	motor learning	1	FALSE	"Any process in which an organism acquires a novel neuromuscular action or movement as the result of experience." [GOC:bf, GOC:PARL, Wikipedia:Motor_learning]	7	2557	1	21118	0.000391083	0.142857	query_1	['GO:0007612']
1134	GO:BP	GO:0061739	protein lipidation involved in autophagosome assembly	1	FALSE	"The protein lipidation process by which phosphatidylethanolamine is conjugated to a protein of the ATG8 family, leading to membrane insertion of the protein as a step in autophagosome assembly." [GOC:autophagy, GOC:dph, PMID:11096062, PMID:11100732, PMID:15277523]	4	2557	1	21118	0.000391083	0.25	query_1	['GO:0000045', 'GO:0006501']
1135	GO:BP	GO:0061738	late endosomal microautophagy	1	FALSE	"The autophagy process by which cytosolic proteins targeted for degradation are tagged with a chaperone and are directly transferred into and degraded in a late endosomal compartment." [GOC:autophagy, GOC:dph, GOC:pad, GOC:PARL, PMID:21238931]	3	2557	1	21118	0.000391083	0.333333	query_1	['GO:0006914']
1136	GO:BP	GO:0061726	mitochondrion disassembly	1	FALSE	"The disaggregation of a mitochondrion into its constituent components." [GOC:autophagy, PMID:25009776]	72	2557	17	21118	0.00664842	0.236111	query_1	['GO:0007005', 'GO:1903008']
[truncated: 8,595 more rows]

## Sheet: ret
	source	native	name	p_value	significant	description	term_size	query_size	intersection_size	effective_domain_size	precision	recall	query	parents
[truncated: 7,409 more rows]

[truncated: 2 more sheets: preadipo, adipo]
