# Supplementary material for: Role of distinct fibroblast lineages and immune cells in dermal repair following UV radiation-induced tissue damage
Source: eLife journal article supplement (doi:10.7554/elife.71052), 2021-12-23
Supplement: supp [file Figure S2C - P21 UV analysis.pdf › Figure 1- supplementary Souce file 2/Figure S2C - P21 UV analysis.pdf]

# P21 UV analysis

November 19, 2021

```
[1]: import os
import numpy as np
import pandas as pd
os.environ['PATH'] += os.pathsep + os.path.
↳expanduser('~\\AppData\\Roaming\\Python\\Lib\\site-packages\\tables')
import scanpy as sc
import loompy as lp
#from MulticoreTSNE import MulticoreTSNE as TSNE
import json
import base64
import zlib
from pyscenic.plotting import plot_binarization
#from pyscenic.export import add_scenic_metadata
#from pyscenic.cli.utils import load_signatures
import matplotlib as mpl
import matplotlib.pyplot as plt
#from scanpy.plotting._tools.scatterplots import plot_scatter
#import scanpy.pl.scatter as plot_scatter
import seaborn as sns
```

```
[2]: adata = sc.read( 'all_cells.loom', validate=False)
```

Variable names are not unique. To make them unique, call  
`.var\_names\_make\_unique`.

```
[3]: adata.var_names_make_unique()
```

```
[4]: adata = adata[adata.obs.age==21]
```

```
[5]: # Set up some scanpy preferences
sc.settings.verbosity = 3 # verbosity: errors (0), warnings (1), info (2),
↳hints (3)
#sc.logging.print_versions()
sc.set_figure_params(dpi=120, fontsize=10, dpi_save=600)

# Set maximum number of jobs for Scanpy. Stops the computer freezing up using
↳all the cores
sc.settings.njobs = 4
```

```
[6]: sc.pl.highest_expr_genes(adata, n_top=20, )
```

```
C:\Users\hhy696\OneDrive - Queen Mary, University of
London\Bioinformatics\bioinf\lib\site-
packages\scanpy\preprocessing\_normalization.py:155: UserWarning: Reviewed a
view of an AnnData. Making a copy.
    view_to_actual(adata)

normalizing counts per cell
finished (0:00:00)
```

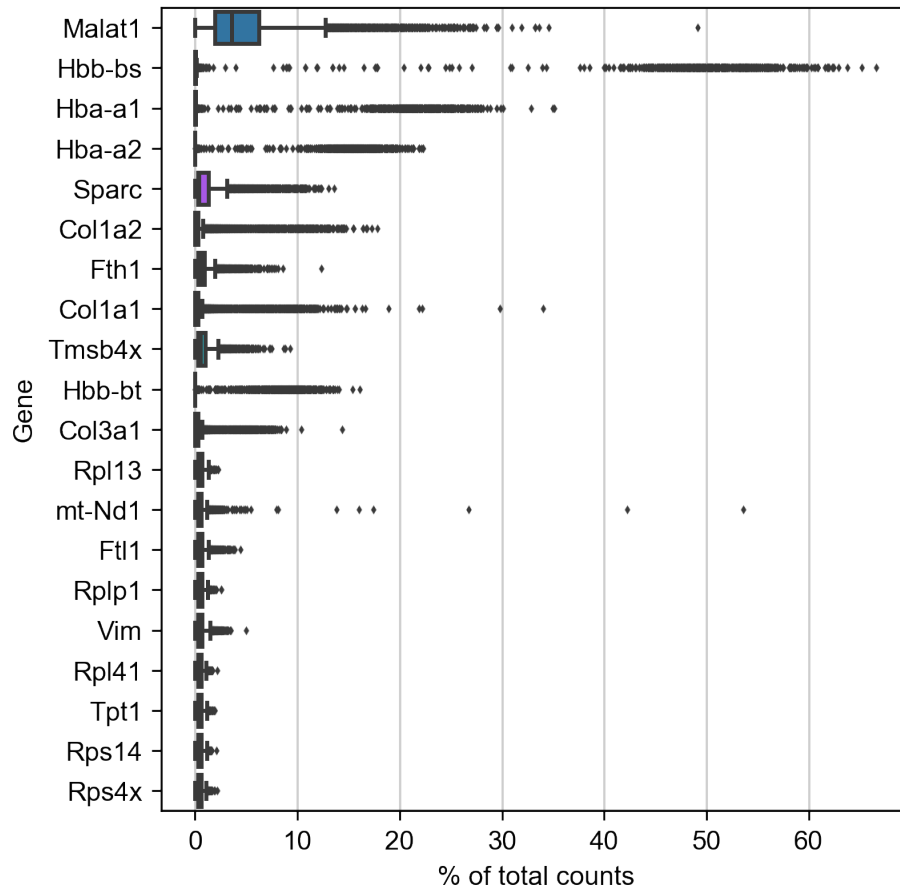

```
[7]: # filter cells with less than 200 genes expressed or genes expressed in less
      < than 3 cells
sc.pp.filter_cells(adata, min_genes=200)
sc.pp.filter_genes(adata, min_cells=3)
```

```
filtered out 447 cells that have less than 200 genes expressed
filtered out 14028 genes that are detected in less than 3 cells
```

```
[8]: sc.pp.calculate_qc_metrics(adata, percent_top=None, log1p=False, inplace=True)
```

```
[9]: sc.pl.violin(adata, ['n_genes_by_counts', 'total_counts'],
        jitter=0.4, multi_panel=True)
```

```
C:\Users\hhy696\OneDrive - Queen Mary, University of
London\Bioinformatics\bioinf\lib\site-packages\anndata\_core\anndata.py:1220:
FutureWarning: The `inplace` parameter in pandas.Categorical.reorder_categories
is deprecated and will be removed in a future version. Removing unused
categories will always return a new Categorical object.
    c.reorder_categories(natsorted(c.categories), inplace=True)
... storing 'CreationDate' as categorical
C:\Users\hhy696\OneDrive - Queen Mary, University of
London\Bioinformatics\bioinf\lib\site-packages\anndata\_core\anndata.py:1220:
FutureWarning: The `inplace` parameter in pandas.Categorical.reorder_categories
is deprecated and will be removed in a future version. Removing unused
categories will always return a new Categorical object.
    c.reorder_categories(natsorted(c.categories), inplace=True)
... storing 'last_modified' as categorical
C:\Users\hhy696\OneDrive - Queen Mary, University of
London\Bioinformatics\bioinf\lib\site-packages\anndata\_core\anndata.py:1220:
FutureWarning: The `inplace` parameter in pandas.Categorical.reorder_categories
is deprecated and will be removed in a future version. Removing unused
categories will always return a new Categorical object.
    c.reorder_categories(natsorted(c.categories), inplace=True)
... storing 'Chromosome' as categorical
C:\Users\hhy696\OneDrive - Queen Mary, University of
London\Bioinformatics\bioinf\lib\site-packages\anndata\_core\anndata.py:1220:
FutureWarning: The `inplace` parameter in pandas.Categorical.reorder_categories
is deprecated and will be removed in a future version. Removing unused
categories will always return a new Categorical object.
    c.reorder_categories(natsorted(c.categories), inplace=True)
... storing 'Strand' as categorical
```

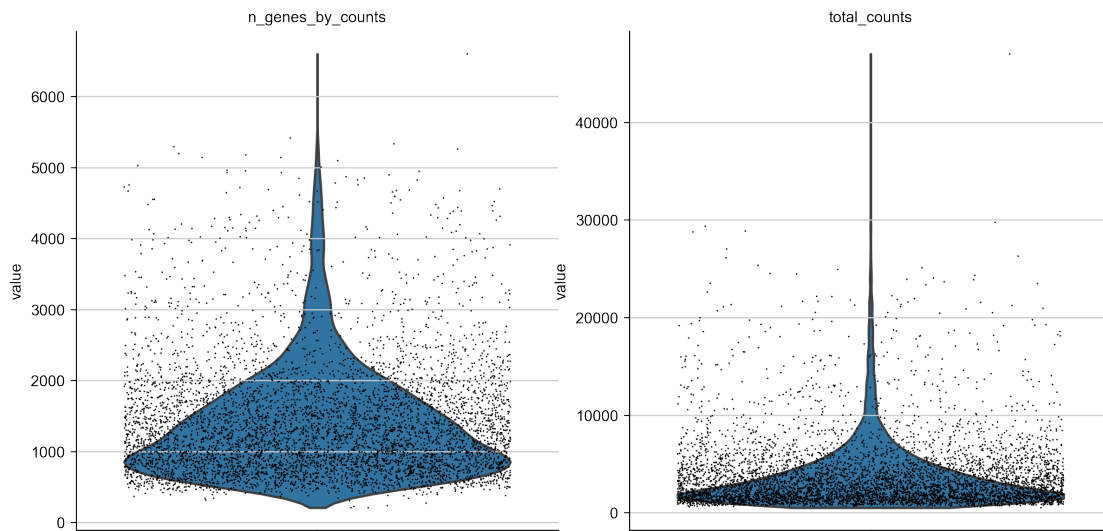

```
[10]: sc.pl.scatter(adata, x='total_counts', y='n_genes_by_counts')
```

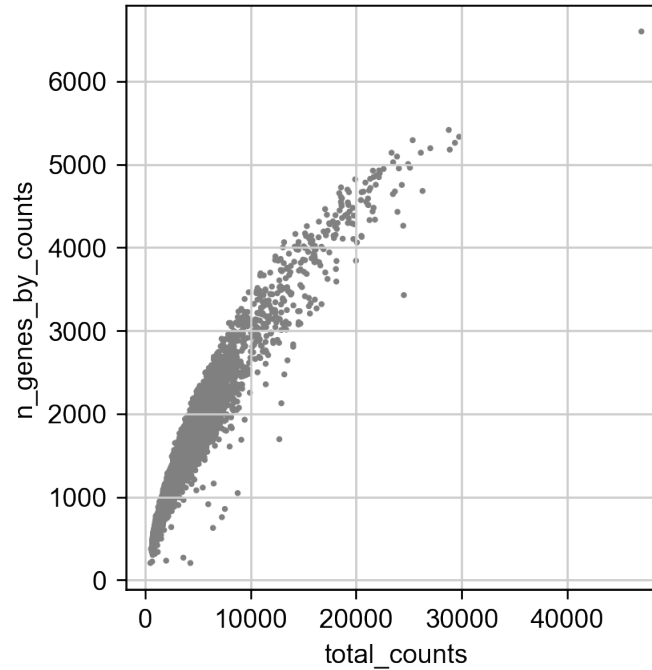

```
[11]: # Do some more preprocessing https://scanpy-tutorials.readthedocs.io/en/latest/  
      ↪ pbmc3k.html  
sc.pp.normalize_total(adata, target_sum=1e4)  
sc.pp.log1p(adata)  
sc.pp.highly_variable_genes(adata, min_mean=0.0125, max_mean=3, min_disp=0.5)  
sc.pl.highly_variable_genes(adata)
```

normalizing counts per cell

finished (0:00:00)

extracting highly variable genes

finished (0:00:00)

--> added

'highly\_variable', boolean vector (adata.var)

'means', float vector (adata.var)

'dispersions', float vector (adata.var)

'dispersions\_norm', float vector (adata.var)

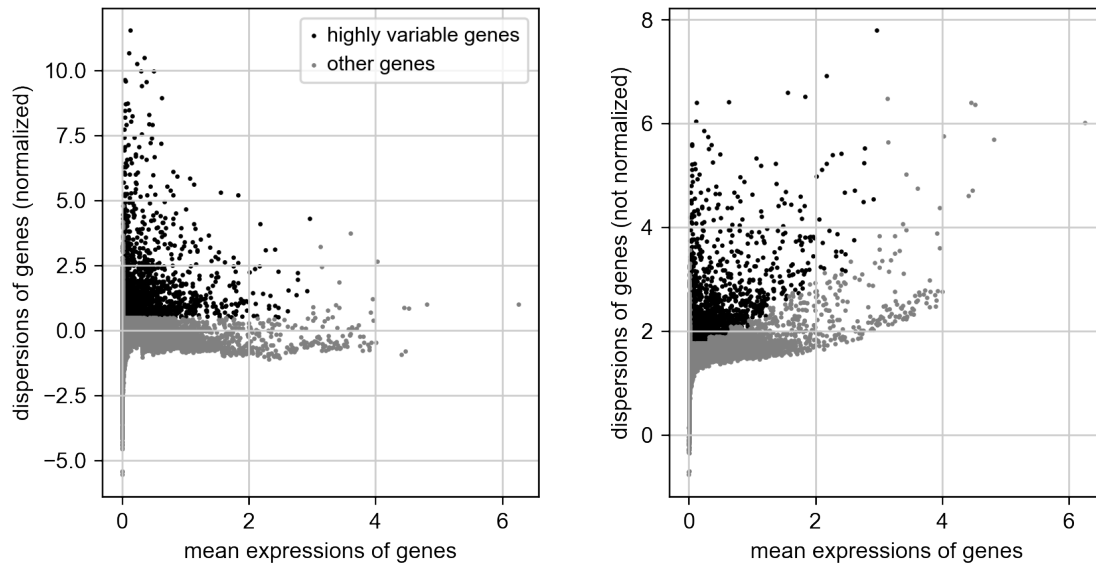

```
[12]: # save a copy of the raw data. This is sometimes used by other functions later
adata.raw = adata
```

```
[13]: # more preprocessing
adata = adata[:, adata.var.highly_variable]
sc.pp.regress_out(adata, ['total_counts'])
sc.pp.scale(adata, max_value=10)
```

```
regressing out ['total_counts']
  sparse input is densified and may lead to high memory use
  finished (0:00:14)
```

```
[14]: # run principal component analysis
sc.tl.pca(adata, n_comps=30)
```

```
computing PCA
  on highly variable genes
  with n_comps=30
  finished (0:00:01)
```

```
[15]: # plot the PCA, colouring by wounded and some fibroblast genes
sc.pl.pca(adata, color=['age', 'sample', 'Pdgfra', 'Twist2', 'Col1a2'], alpha=0.
→5)
```

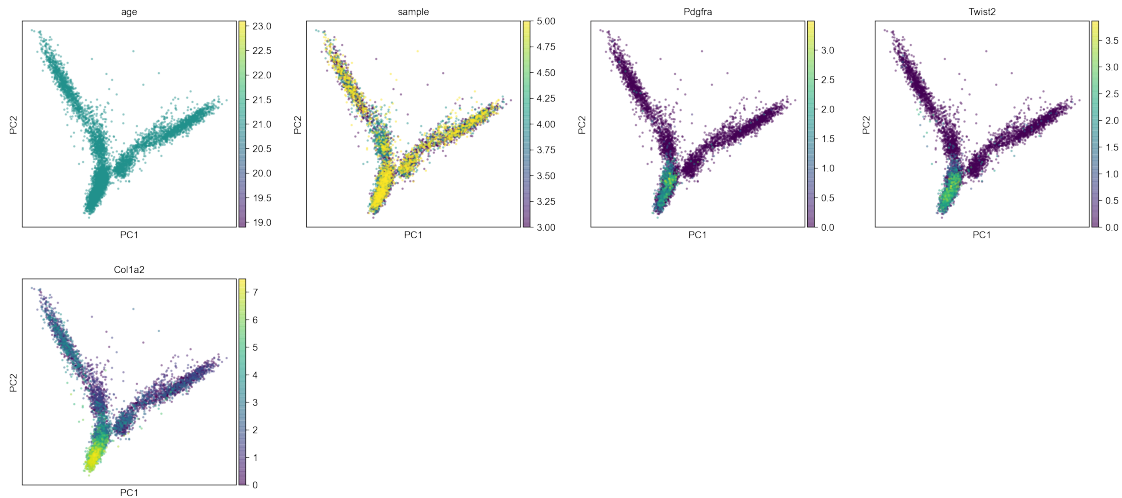

```
[16]:adata.obs['sample'] = adata.obs['sample'].astype('category')
```

```
[17]:# plot the contribution of each PC to the variance
sc.pl.pca_variance_ratio(adata, log=True)
```

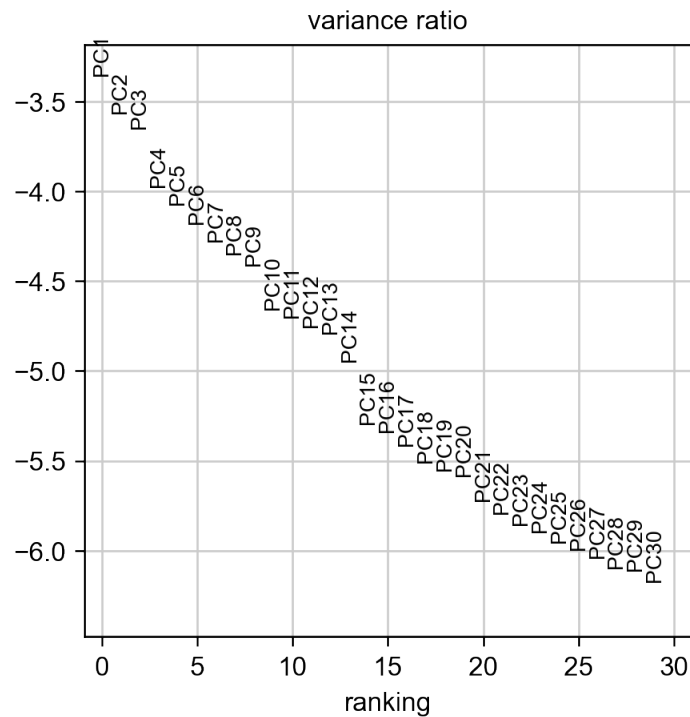

```
[18]: # write your filtered dataset
adata.write('P21 cells filtered.h5ad', compression='lzf')
```

```
[19]: # compute umap embedding
sc.pp.neighbors(adata, n_neighbors=10)
sc.tl.umap(adata)
sc.pl.umap(adata, color=['sample', 'age', 'Pdgrfra', 'Twist2', 'Col1a2'])
```

computing neighbors

using 'X\_pca' with n\_pcs = 30

finished: added to `uns['neighbors']`

`obsp['distances']`, distances for each pair of neighbors

`obsp['connectivities']`, weighted adjacency matrix (0:00:05)

computing UMAP

finished: added

'X\_umap', UMAP coordinates (adata.obsm) (0:00:09)

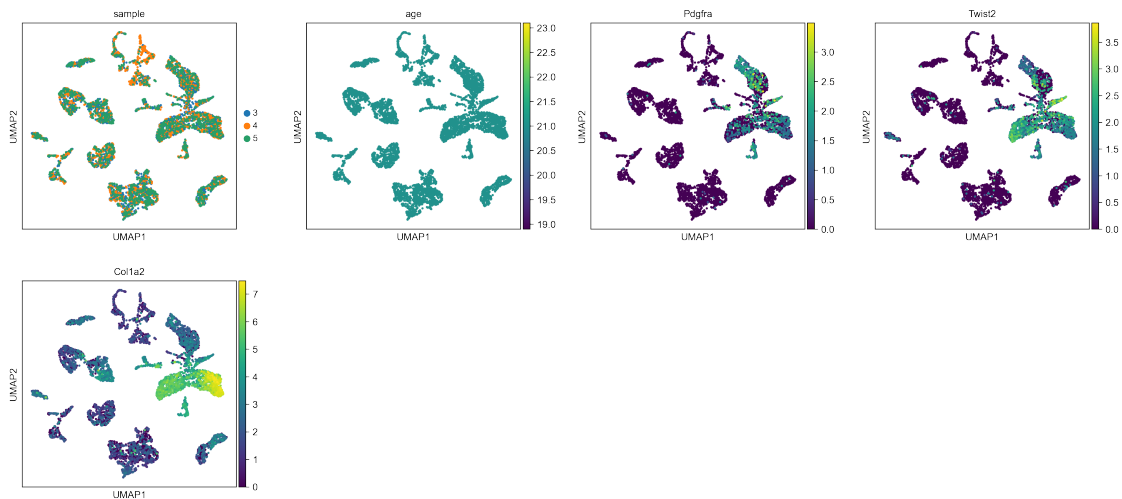

```
[20]: sc.pl.umap(adata, color=['sample', 'age', 'Pdgrfra', 'Twist2', 'Col1a2'])
```

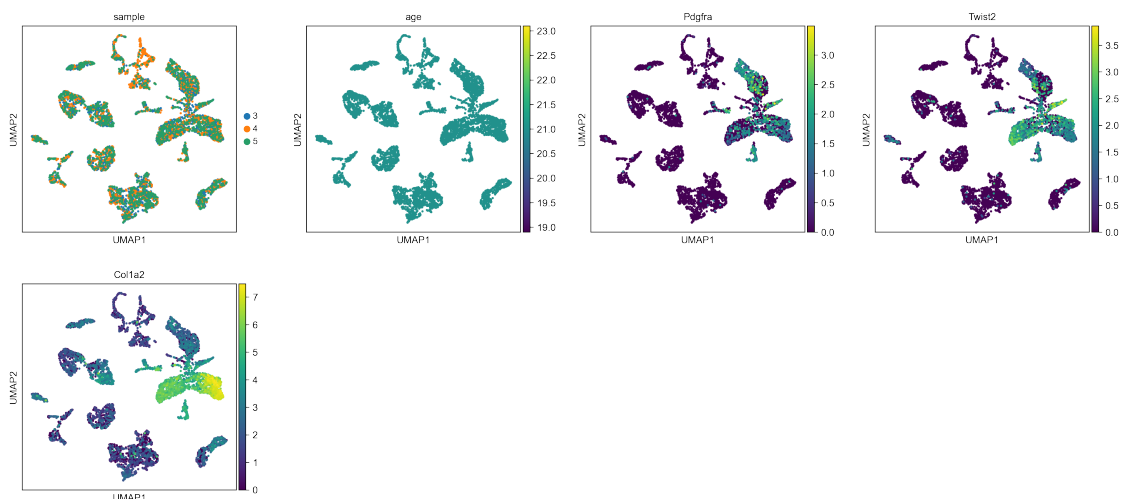

```
[28]: # cluster the data
sc.tl.leiden(adata, resolution=0.05)
sc.pl.umap(adata, color=['leiden'])
```

running Leiden clustering

finished: found 11 clusters and added

'leiden', the cluster labels (adata.obs, categorical) (0:00:00)

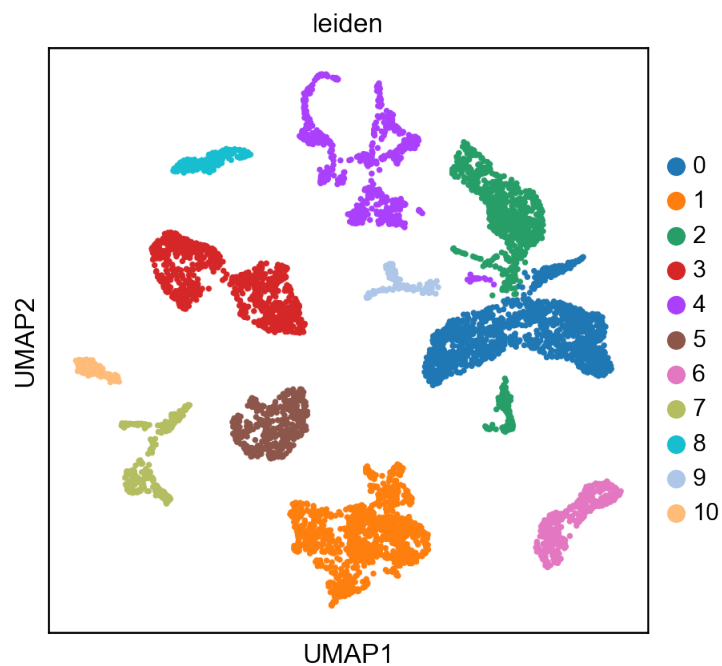



```
[29]: sc.pl.umap(adata, color=['En1', 'Pdgfra', 'Twist2']) # fibroblasts
sc.pl.umap(adata, color=['Col1a1', 'Vim', 'Thy1'])
sc.pl.umap(adata, color=['Krt10', 'Krt14']) # keratinocytes
sc.pl.umap(adata, color=['Pecam1', 'Ly6e', 'Ectscr']) # endothelial (Ly6e+) and
↳ lymphatic (Ly6e-)
sc.pl.umap(adata, color=['Laptm5', 'Cd53', 'Coro1a']) # immune cells
sc.pl.umap(adata, color=['Rgs5', 'Mylk']) # pericytes
sc.pl.umap(adata, color=['Dct', 'Ptgds']) # melanocytes
sc.pl.umap(adata, color=['Plp1', 'Dbi']) # Schwann cells
↳ (developing)
sc.pl.umap(adata, color=['Etv1', 'Fth1']) # Schwann cells
↳ (homeostasis)
```

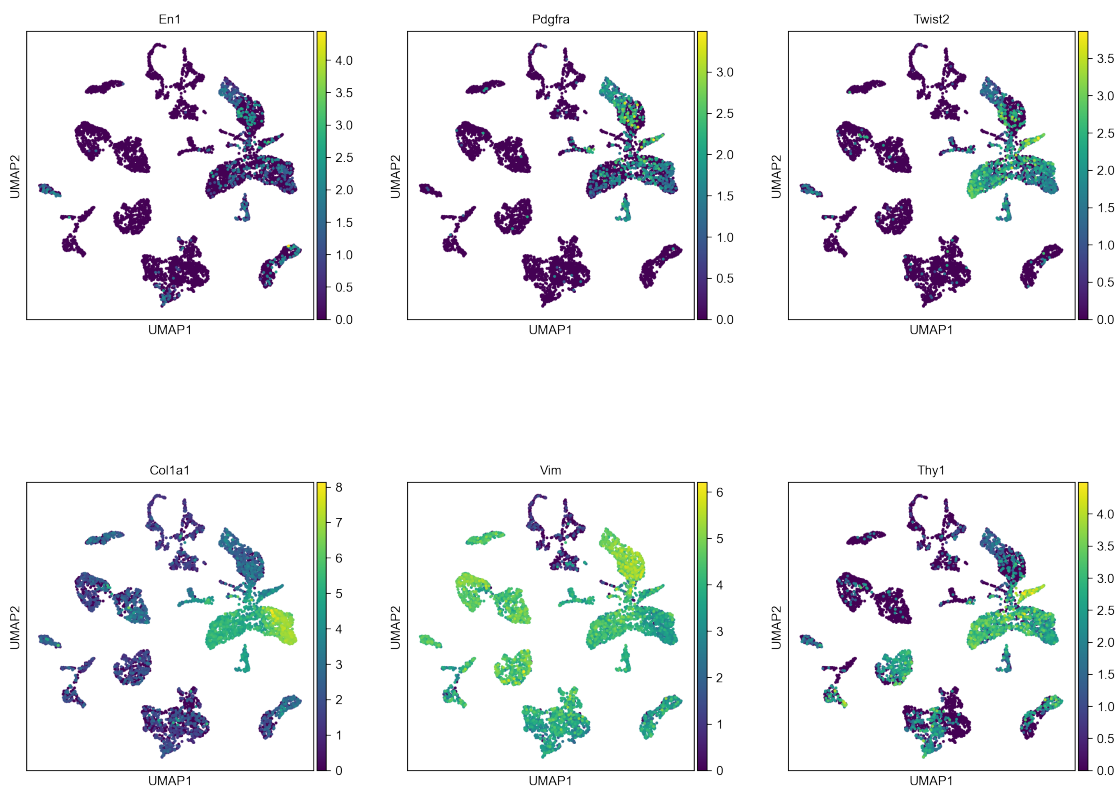

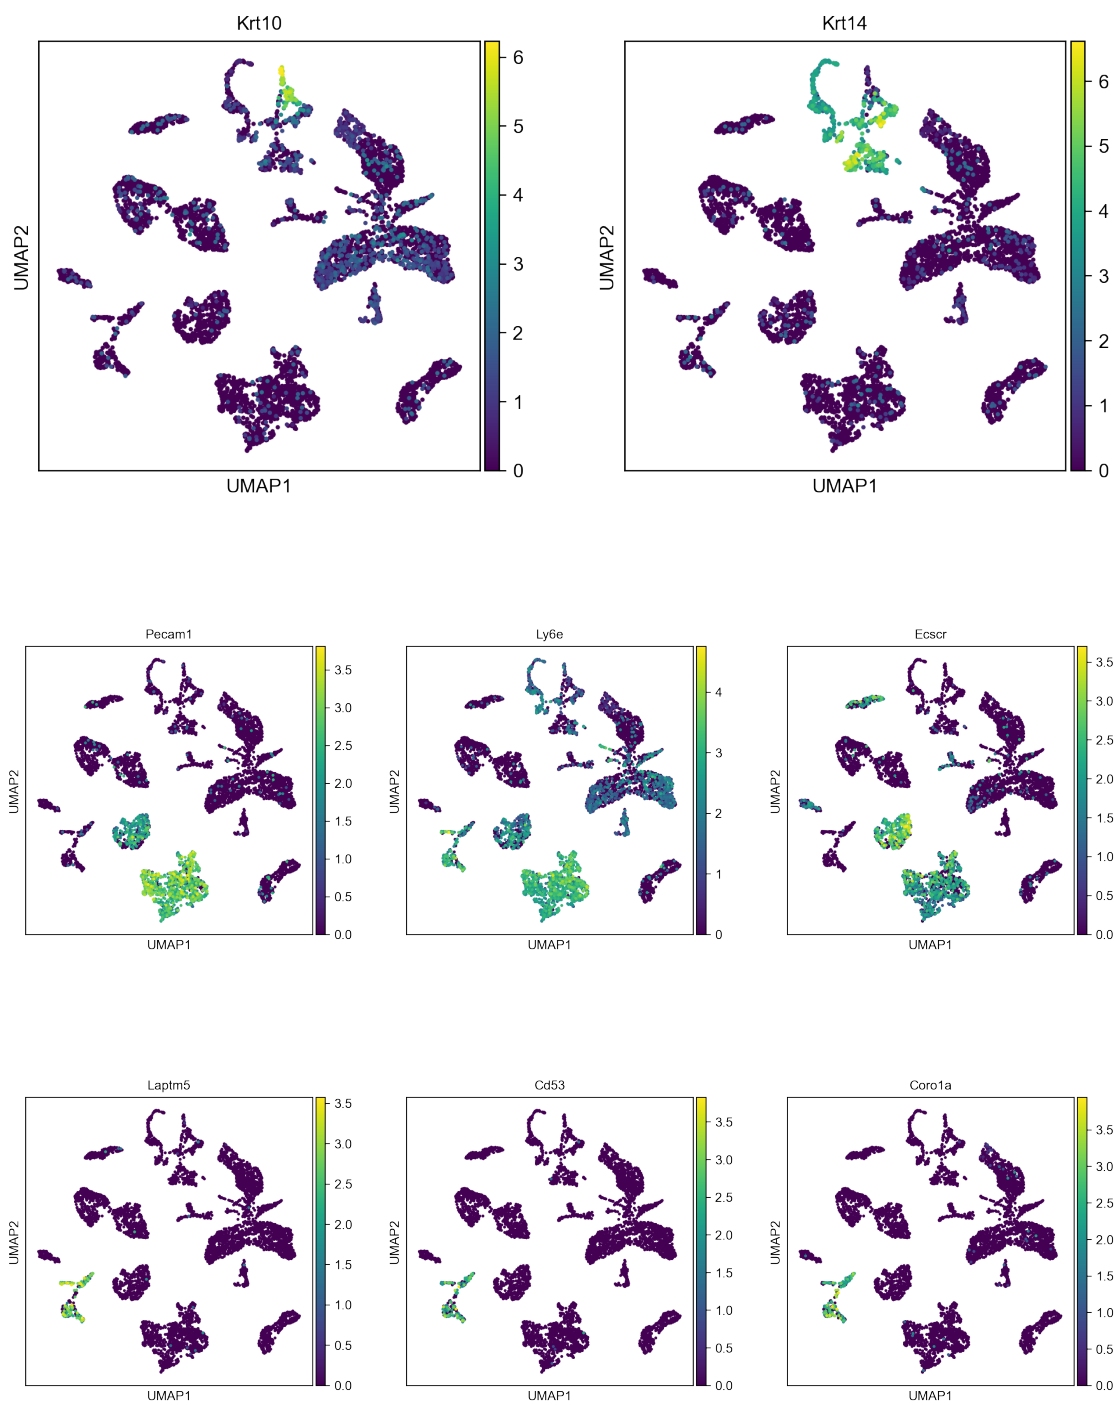

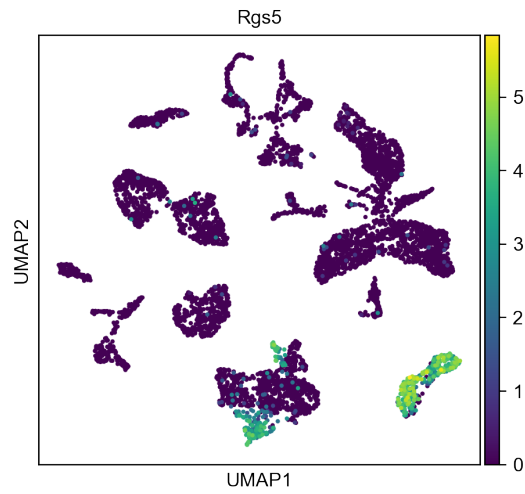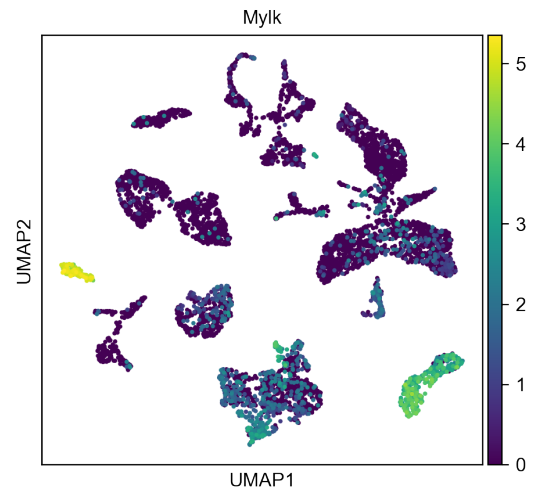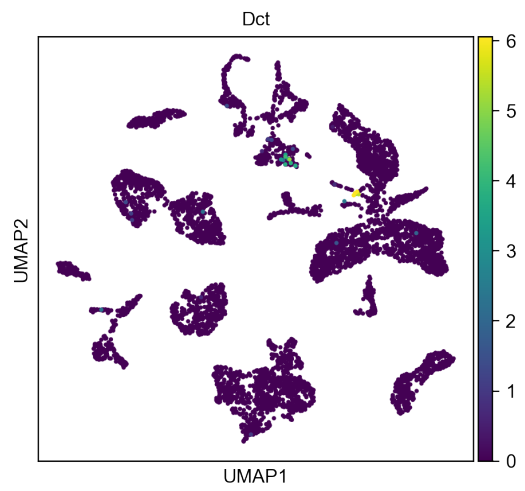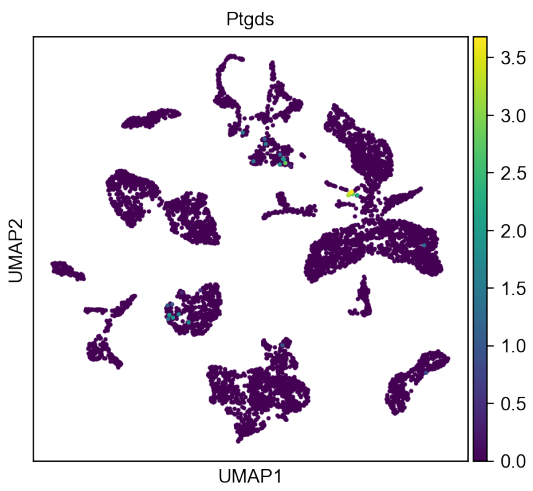

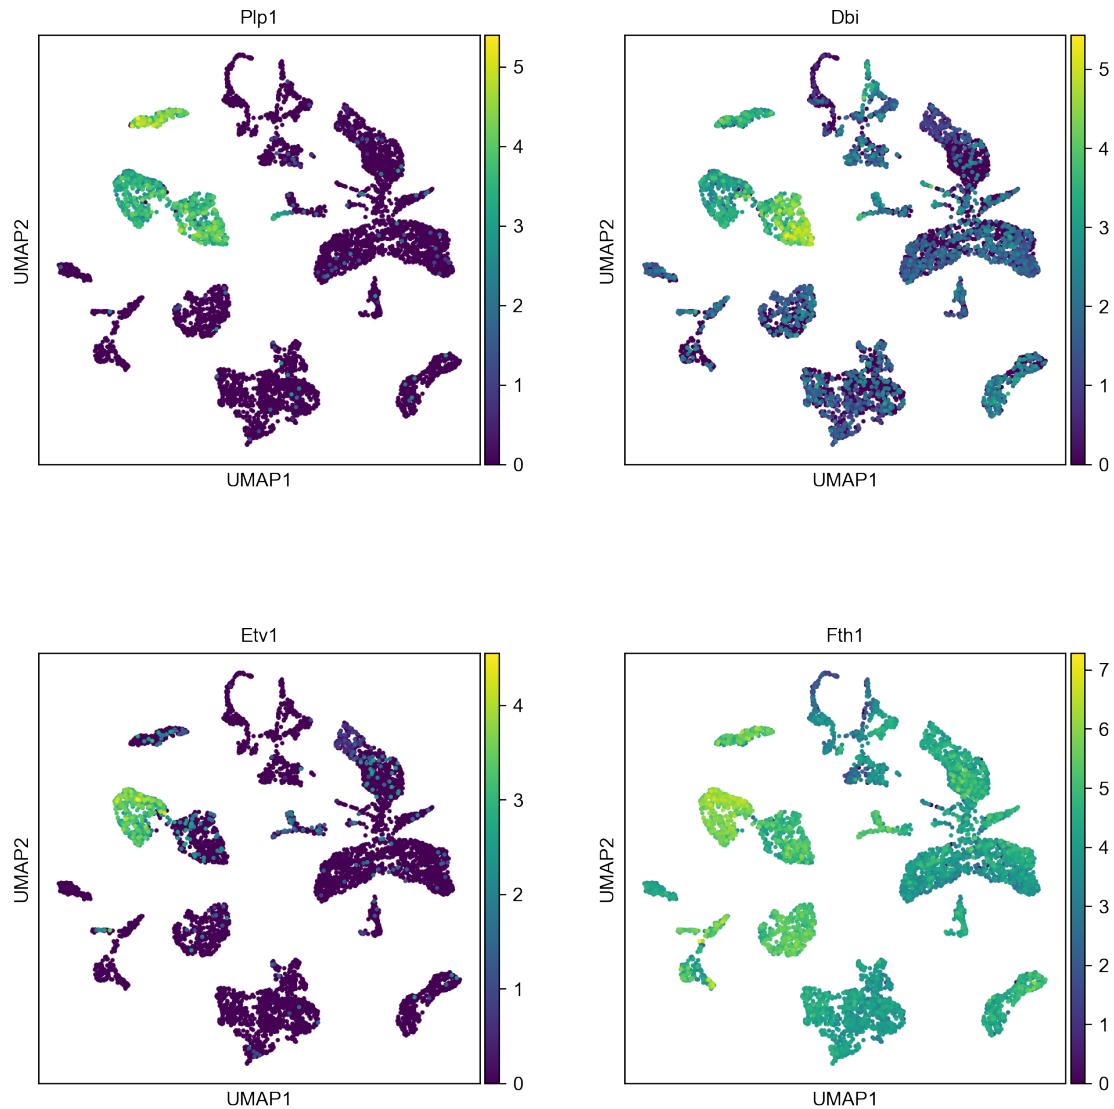

```
[36]: sc.tl.rank_genes_groups(adata, 'leiden', method='t-test')
      pd.DataFrame(adata.uns['rank_genes_groups']['names']).head(10)
```

ranking genes

```
finished: added to `uns['rank_genes_groups']`
'names', sorted np.recarray to be indexed by group ids
'scores', sorted np.recarray to be indexed by group ids
'logfoldchanges', sorted np.recarray to be indexed by group ids
'pvals', sorted np.recarray to be indexed by group ids
'pvals_adj', sorted np.recarray to be indexed by group ids (0:00:01)
```

```
[36]:
```

|   | 0   | 1    | 2      | 3    | 4      | 5     | 6    | 7      | \ |
|---|-----|------|--------|------|--------|-------|------|--------|---|
| 0 | Dcn | Ly6e | Igfbp3 | Plp1 | Lgals7 | Cldn5 | Mylk | Tmsb4x |   |

|   |          |         |        |       |         |        |         |          |
|---|----------|---------|--------|-------|---------|--------|---------|----------|
| 1 | Col1a1   | Pecam1  | Malat1 | Ptn   | Perp    | Fxyd6  | Rgs5    | Fau      |
| 2 | Col1a2   | Cd93    | Lgals1 | Dbi   | Fxyd3   | Gng11  | Sparcl1 | Sh3bgrl3 |
| 3 | Sparc    | Tspan13 | a      | Timp3 | Krt14   | Fth1   | Crip1   | Ucp2     |
| 4 | Mfap2    | Adgrf5  | Inhba  | Sparc | S100a14 | Prox1  | Cald1   | Laptm5   |
| 5 | Serpinh1 | Ifitm3  | Fgfr1  | Cd59a | Trim29  | Mmrn1  | Myl9    | B2m      |
| 6 | Lum      | Cdh5    | Vim    | S100b | Sfn     | Ecscr  | Tpm1    | Coro1a   |
| 7 | Cd63     | Plvap   | Bmp4   | Gpm6b | Krt15   | Pard6g | Tpm2    | H2-D1    |
| 8 | Mfap4    | Tm4sf1  | Gpx1   | Fth1  | Spint2  | Aplp2  | Acta2   | Srgn     |
| 9 | Htra1    | Scarb1  | Dkk2   | Fxyd1 | Anxa8   | Fgl2   | Des     | Arhgdib  |

|   | 8     | 9      | 10    |
|---|-------|--------|-------|
| 0 | Mpz   | Dcn    | Mylk  |
| 1 | Mbp   | Gsn    | Acta2 |
| 2 | Pmp22 | Igfbp6 | Myh11 |
| 3 | Ncmab | Mfap5  | Tpm2  |
| 4 | Cryab | Tgfb1  | Myl9  |
| 5 | Gatm  | Ebf2   | Tpm1  |
| 6 | Plp1  | Mgp    | Des   |
| 7 | Mal   | Col3a1 | Cald1 |
| 8 | Pllp  | Col1a2 | Tagln |
| 9 | Kcna1 | Cldn1  | Myl6  |

```
[37]: main_clusters =
    ↳ ['Fibroblast', 'Endothelial', 'Fibroblast', 'Schwann', 'Keratinocyte', 'Endothelial', 'Pericyte',
      'Immune', 'Schwann', 'Fibroblast', 'SMC']
adata.obs['cell_type'] = [main_clusters[int(x)] for x in adata.obs.leiden]
sc.pl.umap(adata, color='cell_type')
```

```
C:\Users\hhy696\OneDrive - Queen Mary, University of
London\Bioinformatics\bioinf\lib\site-packages\anndata\_core\anndata.py:1220:
FutureWarning: The `inplace` parameter in pandas.Categorical.reorder_categories
is deprecated and will be removed in a future version. Removing unused
categories will always return a new Categorical object.
    c.reorder_categories(natsorted(c.categories), inplace=True)
... storing 'cell_type' as categorical
```

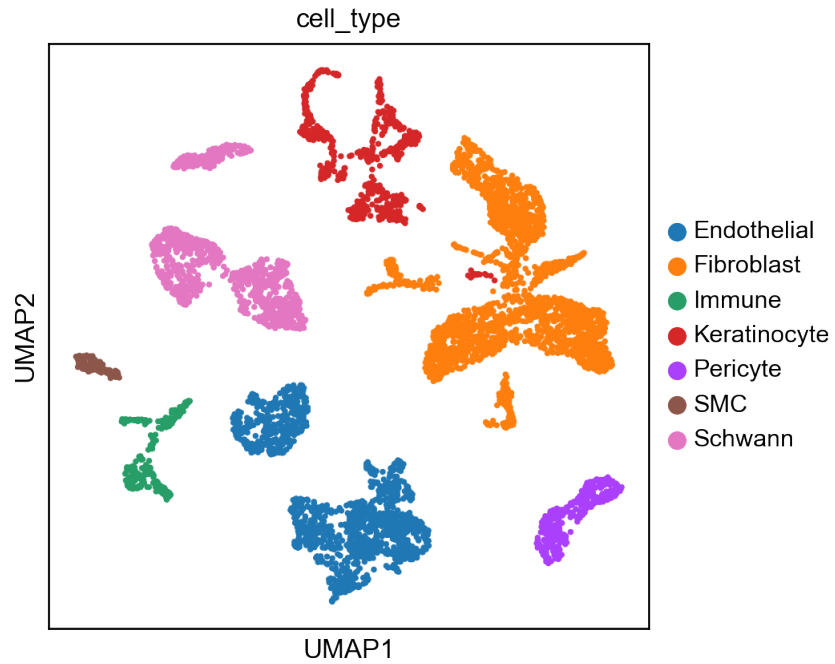

```
[38]: sc.pl.umap(adata[adata.obs.cell_type=='Fibroblast'], color='leiden')
```

Trying to set attribute ``.uns`` of view, copying.

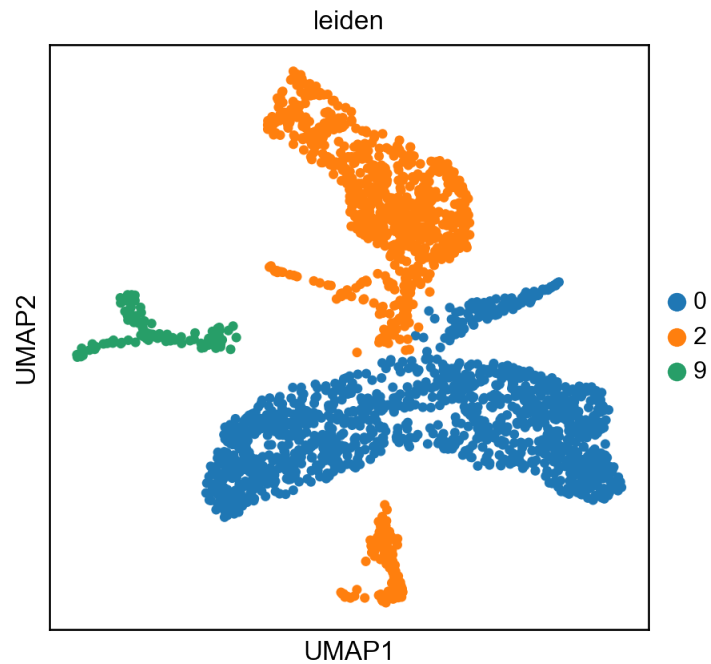

```
[39]: fbs = adata[adata.obs.cell_type=='Fibroblast']

[40]: fbs.write('P21 fibroblasts.h5ad', compression='lzf')

[41]: # delete all old attributes so we can recompute umap
del fbs.uns['neighbors']
del fbs.uns['pca']
del fbs.obsp['distances']
del fbs.obsp['connectivities']
del fbs.obsm['X_pca']
del fbs.obsm['X_umap']
del fbs.varm['PCs']

# compute umap embedding
sc.pp.neighbors(fbs, n_neighbors=10, n_pcs=40)
sc.tl.umap(fbs)
sc.pl.umap(fbs)
```

computing neighbors

WARNING: You're trying to run this on 2142 dimensions of `.X`, if you really want this, set `use\_rep='X'`.

Falling back to preprocessing with `sc.pp.pca` and default params.

computing PCA

with n\_comps=50

finished (0:00:00)

finished: added to `.uns['neighbors']`

`.obsp['distances']`, distances for each pair of neighbors

`.obsp['connectivities']`, weighted adjacency matrix (0:00:00)

computing UMAP

finished: added

'X\_umap', UMAP coordinates (adata.obsm) (0:00:04)

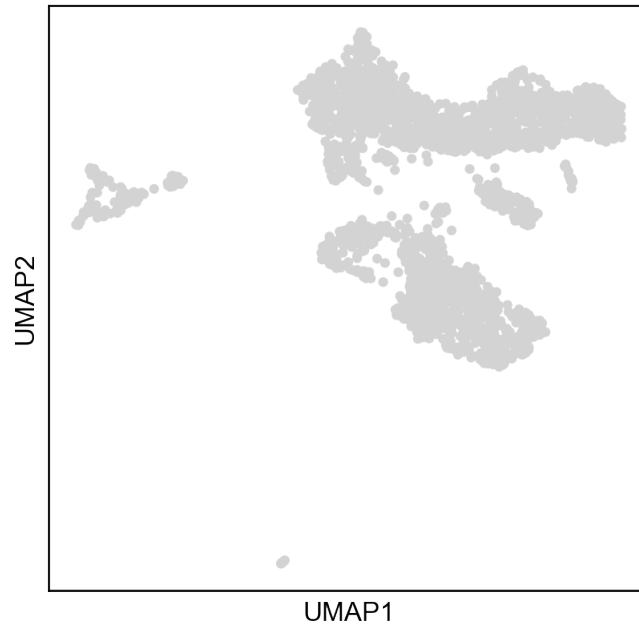

```
[47]: # cluster the data
sc.tl.leiden(fbs, resolution=0.08)
sc.pl.umap(fbs, color=['leiden'])
```

```
running Leiden clustering
finished: found 7 clusters and added
'leiden', the cluster labels (adata.obs, categorical) (0:00:00)
```



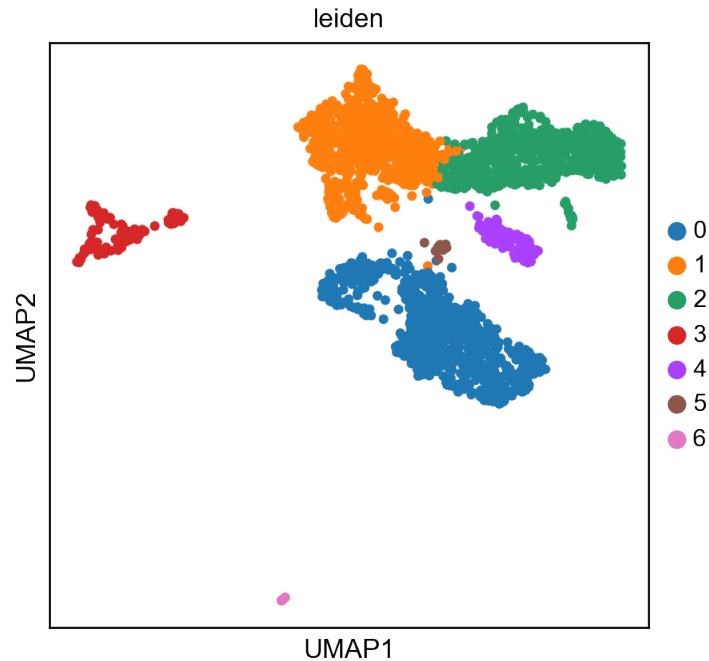

```
[48]: sc.pl.umap(fbs, color=['leiden', 'Itga8', 'Ebf2'])
```

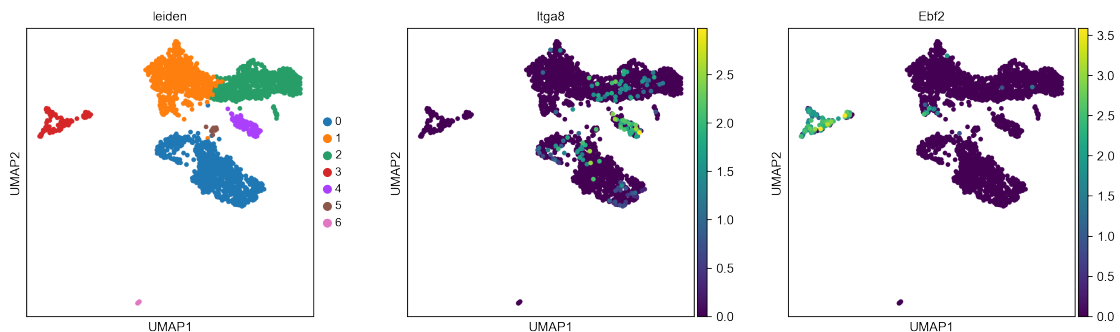

```
[50]: sc.tl.rank_genes_groups(fbs, 'leiden', method='t-test')
pd.DataFrame(fbs.uns['rank_genes_groups']['names']).head(10)
```

ranking genes

```
finished: added to `uns['rank_genes_groups']`
'names', sorted np.recarray to be indexed by group ids
'scores', sorted np.recarray to be indexed by group ids
'logfoldchanges', sorted np.recarray to be indexed by group ids
'pvals', sorted np.recarray to be indexed by group ids
'pvals_adj', sorted np.recarray to be indexed by group ids (0:00:00)
```

```
[50]:
```

|   | 0        | 1      | 2       | 3      | 4      | 5      | 6      |
|---|----------|--------|---------|--------|--------|--------|--------|
| 0 | Igfbp3   | Col3a1 | Coch    | Gsn    | Igfbp4 | Krt18  | Rsrp1  |
| 1 | Malat1   | Clec3b | Tnmd    | Igfbp6 | Thy1   | Krt8   | Dct    |
| 2 | a        | Lum    | Ogn     | Ebf2   | Aqp1   | Krt19  | Mitf   |
| 3 | Inhba    | Col1a1 | Fmod    | Mfap5  | Vcan   | Epcam  | Mt2    |
| 4 | Gpx1     | Eln    | Col11a1 | Mgp    | Nrp1   | Ly6e   | Gstp1  |
| 5 | Fgfr1    | Col1a2 | Kera    | Cav1   | Tcf4   | Tm4sf1 | Mlana  |
| 6 | Socs3    | Sparc  | Emid1   | Cldn1  | Col6a2 | Rpl26  | Rpl19  |
| 7 | Ptma     | Mfap4  | Crabp1  | Tgfb1  | Col6a1 | Rps28  | Tyrp1  |
| 8 | Vim      | Col5a1 | Ecm2    | Fth1   | Chrm2  | Cldn3  | Ptgds  |
| 9 | Serpine2 | Dcn    | Mafb    | Nr2f2  | Pmp22  | Ndufa4 | Chchd2 |

```
[52]: sc.pl.dotplot(fbs, var_names=['Ebf2', 'Itga8', 'Acta2'], groupby='leiden')
```

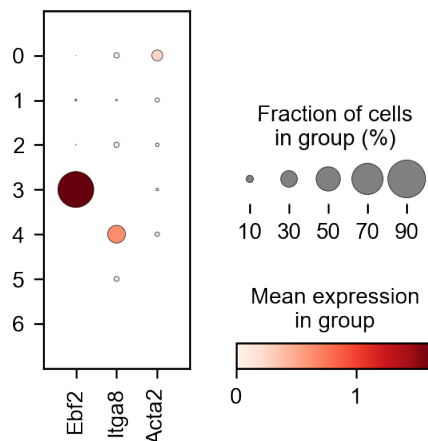

```
[63]: cluster_names = ['DP/DS', 'Reticular', 'Coch', 'Ebf2', 'APM', '', '']
```

```
[64]: fbs.obs['cell_type'] = [cluster_names[int(x)] for x in fbs.obs.leiden]
```

Trying to set attribute ``.obs`` of view, copying.

```
[60]: # Exclude very small undefined populations expressing keratinocyte and
      ↪ melanocyte markers
fbs = fbs[fbs.obs.cell_type.isin(['DP/DS', 'Reticular', 'Coch', 'Ebf2', 'APM'])]
```

```
[65]: sc.pl.umap(fbs, color=['cell_type'])
```

C:\Users\hhy696\OneDrive - Queen Mary, University of London\Bioinformatics\bioinf\lib\site-packages\anndata\\_core\anndata.py:1220:

FutureWarning: The `inplace` parameter in pandas.Categorical.reorder\_categories is deprecated and will be removed in a future version. Removing unused categories will always return a new Categorical object.

```
c.reorder_categories(natsorted(c.categories), inplace=True)
... storing 'cell_type' as categorical
```

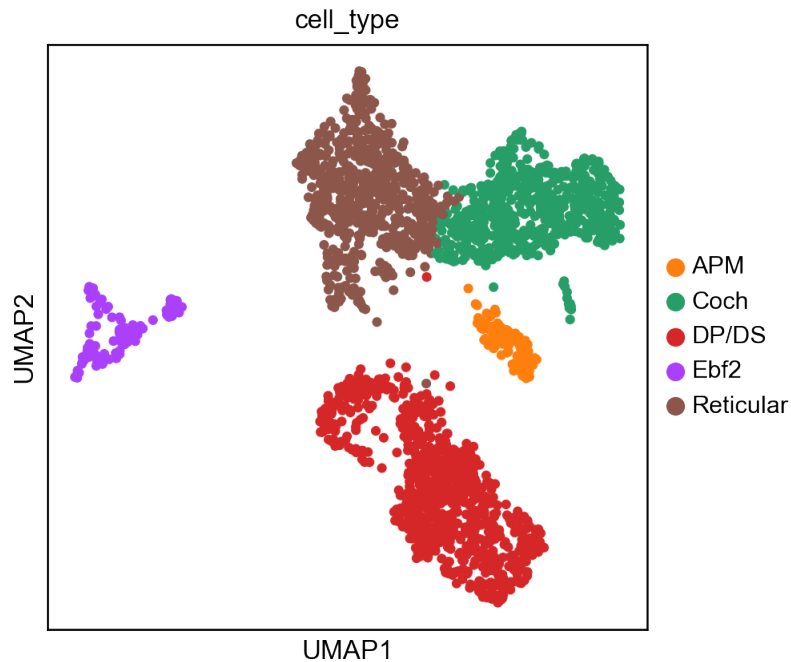

```
[69]: sc.pl.umap(fbs, color=['Coch', 'Ly6a', 'Ebf2', 'Itga8', 'Fgf7', 'Fgf10'])
# Reticular: Ly6a
# APM: Itga8
# DP: Fgf7, Fgf10, Sox2
```

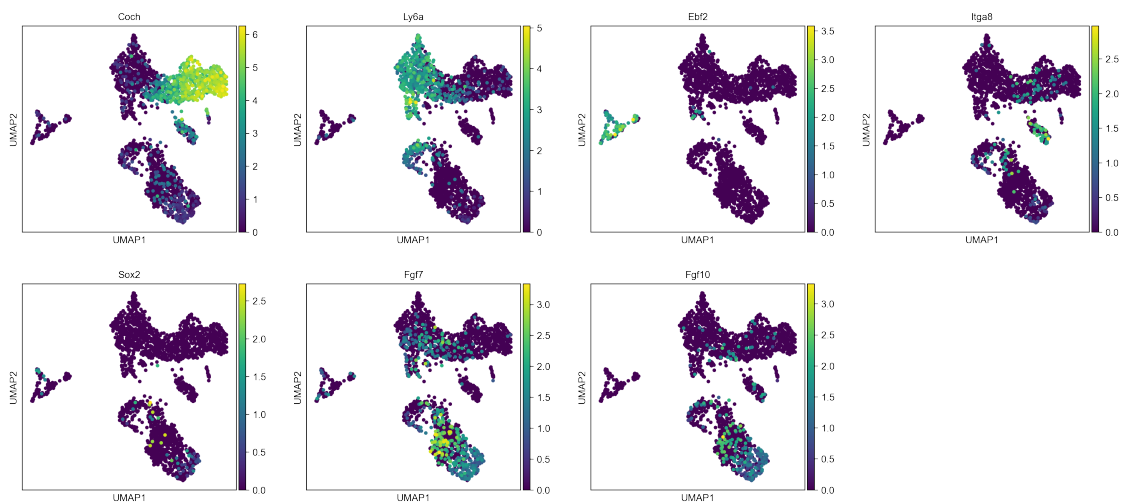

```
[70]: fbs.write('P21 fibroblasts.h5ad', compression='lzf')
```

```
[71]: sc.tl.rank_genes_groups(fbs, 'cell_type', method='t-test')
pd.DataFrame(fbs.uns['rank_genes_groups']['names']).head(10)
```

ranking genes

```
finished: added to `uns['rank_genes_groups']`
'names', sorted np.recarray to be indexed by group ids
'scores', sorted np.recarray to be indexed by group ids
'logfoldchanges', sorted np.recarray to be indexed by group ids
'pvals', sorted np.recarray to be indexed by group ids
'pvals_adj', sorted np.recarray to be indexed by group ids (0:00:00)
```

```
[71]:      APM      Coch  DP/DS      Ebf2 Reticular
0  Igfbp4      Coch  Igfbp3      Gsn    Col3a1
1    Thy1      Tnmd  Malat1  Igfbp6    Clec3b
2    Aqp1      Ogn      a    Ebf2      Lum
3    Vcan      Fmod  Inhba  Mfap5    Col1a1
4    Nrp1  Col11a1    Gpx1    Mgp      Eln
5    Tcf4      Kera  Fgfr1    Cav1    Col1a2
6  Col6a2      Emid1  Ptma  Cldn1    Sparc
7  Col6a1  Crabp1  Lgals3  Tgfb1    Mfap4
8   Chrm2      Ecm2  Socs3  Nr2f2    Col5a1
9   Pmp22      Mafb    Vim   Fth1      Dcn
```

```
[78]: sig_genes = sc.get.rank_genes_groups_df(fbs, group=None, pval_cutoff=0.05,
↳log2fc_min=1)
```

```
[79]: sig_genes
```

```
[79]:      group  names      scores  logfoldchanges      pvals      pvals_adj
0      APM  Igfbp4  22.838535      3.363599  2.985981e-45  7.258919e-43
1      APM   Thy1  14.598826      2.558907  2.126822e-27  1.731681e-25
2      APM   Aqp1  14.269781      3.620008  5.803036e-26  4.238208e-24
3      APM   Vcan  13.106678      3.801002  2.460013e-23  1.500431e-21
4      APM   Nrp1  12.734237      4.321249  1.753802e-22  9.882266e-21
...
3933 Reticular   Pigz   2.440641      3.167039  1.491760e-02  4.755077e-02
3934 Reticular  Bdkrb2   2.436770      2.448219  1.507234e-02  4.800411e-02
3935 Reticular  Prrt4   2.435076     23.212461  1.516508e-02  4.825819e-02
3936 Reticular  Mcoln2   2.433280      2.961850  1.521281e-02  4.837907e-02
3937 Reticular   C1rl   2.424847      1.227175  1.552969e-02  4.929466e-02
```

[3938 rows x 6 columns]

```
[80]: ap = sc.queries.enrich(list(sig_genes[sig_genes.group=='APM'].names.values),
    ↪org='mmusculus', gprofiler_kwargs={'all_results':True, 'sources':['GO:BP']})
dpds = sc.queries.enrich(list(sig_genes[sig_genes.group=='DP/DS'].names.
    ↪values), org='mmusculus', gprofiler_kwargs={'all_results':True, 'sources':
    ↪['GO:BP']})
ebf = sc.queries.enrich(list(sig_genes[sig_genes.group=='Ebf2'].names.values),
    ↪org='mmusculus', gprofiler_kwargs={'all_results':True, 'sources':['GO:BP']})
coch = sc.queries.enrich(list(sig_genes[sig_genes.group=='Coch'].names.values),
    ↪org='mmusculus', gprofiler_kwargs={'all_results':True, 'sources':['GO:BP']})
ret = sc.queries.enrich(list(sig_genes[sig_genes.group=='Reticular'].names.
    ↪values), org='mmusculus', gprofiler_kwargs={'all_results':True, 'sources':
    ↪['GO:BP']})
```

```
[81]: results = [ap,dpds,ebf,coch,ret]
for result in results:
    print(result[result.name.str.contains('response to UV')].name, end=' ')
    print(result[result.name.str.contains('response to UV')].p_value)
```

```
1795    cellular response to UV-A
1796    cellular response to UV-B
1901          response to UV-A
2274          response to UV
2354          response to UV-B
3407    cellular response to UV
Name: name, dtype: object 1795    1.0
1796    1.0
1901    1.0
2274    1.0
2354    1.0
3407    1.0
Name: p_value, dtype: float64
974    cellular response to UV-C
1364    cellular response to UV-B
4788          response to UV-C
4789          response to UV-B
4801          response to UV
8643    cellular response to UV
Name: name, dtype: object 974    1.0
1364    1.0
4788    1.0
4789    1.0
4801    1.0
8643    1.0
Name: p_value, dtype: float64
996          response to UV-A
3694          response to UV
6644    cellular response to UV
```

```

Name: name, dtype: object 996      1.0
3694      1.0
6644      1.0
Name: p_value, dtype: float64
649      response to UV-A
2596      cellular response to UV-C
2597      cellular response to UV-B
3536      response to UV-C
3537      response to UV-B
3567      response to UV
4720      cellular response to UV
Name: name, dtype: object 649      1.0
2596      1.0
2597      1.0
3536      1.0
3537      1.0
3567      1.0
4720      1.0
Name: p_value, dtype: float64
733      response to UV-A
2899      cellular response to UV-B
2900      cellular response to UV-A
3453      response to UV
4017      response to UV-B
5144      cellular response to UV
Name: name, dtype: object 733      1.0
2899      1.0
2900      1.0
3453      1.0
4017      1.0
5144      1.0
Name: p_value, dtype: float64

```

```
[82]: dpds[dpds.name.str.contains('response to UV')]
```

```

[82]:      source      native      name  p_value  significant  \
974   GO:BP   GO:0071494  cellular response to UV-C      1.0      False
1364  GO:BP   GO:0071493  cellular response to UV-B      1.0      False
4788  GO:BP   GO:0010225      response to UV-C      1.0      False
4789  GO:BP   GO:0010224      response to UV-B      1.0      False
4801  GO:BP   GO:0009411      response to UV      1.0      False
8643  GO:BP   GO:0034644  cellular response to UV      1.0      False

      description  term_size  \
974  "Any process that results in a change in state...      6
1364  "Any process that results in a change in state...      9
4788  "Any process that results in a change in state...     14

```

|      |                                                   |     |
|------|---------------------------------------------------|-----|
| 4789 | "Any process that results in a change in state... | 18  |
| 4801 | "Any process that results in a change in state... | 148 |
| 8643 | "Any process that results in a change in state... | 89  |

|      | query_size | intersection_size | effective_domain_size | precision | \ |
|------|------------|-------------------|-----------------------|-----------|---|
| 974  | 1346       | 2                 | 21118                 | 0.001486  |   |
| 1364 | 1346       | 2                 | 21118                 | 0.001486  |   |
| 4788 | 1346       | 4                 | 21118                 | 0.002972  |   |
| 4789 | 1346       | 4                 | 21118                 | 0.002972  |   |
| 4801 | 1346       | 19                | 21118                 | 0.014116  |   |
| 8643 | 1346       | 11                | 21118                 | 0.008172  |   |

|      | recall   | query   | parents                  |
|------|----------|---------|--------------------------|
| 974  | 0.333333 | query_1 | [G0:0010225, G0:0034644] |
| 1364 | 0.222222 | query_1 | [G0:0010224, G0:0034644] |
| 4788 | 0.285714 | query_1 | [G0:0009411]             |
| 4789 | 0.222222 | query_1 | [G0:0009411]             |
| 4801 | 0.128378 | query_1 | [G0:0009416]             |
| 8643 | 0.123596 | query_1 | [G0:0009411, G0:0071482] |

```
[83]: names = ['ap', 'dpds', 'ebf', 'coch', 'ret']
      for i in range(len(names)):
          results[i].to_csv('csv/p21/'+names[i]+'.csv')
```

```
[ ]:
```
