# Supplementary material for: Role of distinct fibroblast lineages and immune cells in dermal repair following UV radiation-induced tissue damage
Source: eLife journal article supplement (doi:10.7554/elife.71052), 2021-12-23
Supplement: supp [file Figure S2D - GO enrichment analysis P21 mouse dermis.xlsx]

## Sheet: Summary
			Summary of selected GO terms (p-value log10) from adult mouse skin fibroblasts P21
			DP/DS	APM	Reticular Fb	Coch	Ebf2
		regulation of apoptotic process	12.6085	1.01079	0.877058	0	3.21963
		response to oxidative stress	0.660806	0	0	0	0
		response to stress	2.76583	0.813489	6.45294	0	6.27835
		cellular response to stress	3.12411	0	0	0	1.21219
		UV-damage excision repair	0	0	0	0	0
		DNA repair	0	0	0	0	0
		DNA damage response, signal transduction by p53 class mediator	6.41199	0	0	0	0
		signal transduction in response to DNA damage	1.81599	0	0	0	0
		cellular response to DNA damage stimulus	0	0	0	0	0
		cellular response to UV	0	0	0	0	0
		response to UV	0	0	0	0	0

## Sheet: dpds
	source	native	name	p_value	significant	description	term_size	query_size	intersection_size	effective_domain_size	precision	recall	query	parents
0	GO:BP	GO:0048731	system development	1.41146e-40	TRUE	"The process whose specific outcome is the progression of an organismal system over time, from its formation to the mature structure. A system is a regularly interacting or interdependent group of organs or tissues that work together to carry out a given biological process." [GOC:dph, GOC:jid]	4876	1346	531	21118	0.394502	0.108901	query_1	['GO:0007275', 'GO:0048856']
1	GO:BP	GO:0048523	negative regulation of cellular process	2.65867e-39	TRUE	"Any process that stops, prevents, or reduces the frequency, rate or extent of a cellular process, any of those that are carried out at the cellular level, but are not necessarily restricted to a single cell. For example, cell communication occurs among more than one cell, but occurs at the cellular level." [GOC:jid]	5068	1346	542	21118	0.402675	0.106946	query_1	['GO:0009987', 'GO:0048519', 'GO:0050794']
2	GO:BP	GO:0007275	multicellular organism development	5.20032e-39	TRUE	"The biological process whose specific outcome is the progression of a multicellular organism over time from an initial condition (e.g. a zygote or a young adult) to a later condition (e.g. a multicellular animal or an aged adult)." [GOC:dph, GOC:ems, GOC:isa_complete, GOC:tb]	5441	1346	569	21118	0.422734	0.104576	query_1	['GO:0032501', 'GO:0048856']
3	GO:BP	GO:0032502	developmental process	5.74079e-39	TRUE	"A biological process whose specific outcome is the progression of an integrated living unit: an anatomical structure (which may be a subcellular structure, cell, tissue, or organ), or organism over time from an initial condition to a later condition." [GOC:isa_complete]	6536	1346	648	21118	0.481426	0.0991432	query_1	['GO:0008150']
4	GO:BP	GO:0009893	positive regulation of metabolic process	4.48116e-38	TRUE	"Any process that activates or increases the frequency, rate or extent of the chemical reactions and pathways within a cell or an organism." [GOC:go_curators]	3760	1346	437	21118	0.324666	0.116223	query_1	['GO:0008152', 'GO:0019222', 'GO:0048518']
5	GO:BP	GO:0031325	positive regulation of cellular metabolic process	1.54671e-37	TRUE	"Any process that activates or increases the frequency, rate or extent of the chemical reactions and pathways by which individual cells transform chemical substances." [GOC:mah]	3275	1346	396	21118	0.294205	0.120916	query_1	['GO:0009893', 'GO:0031323', 'GO:0044237', 'GO:0048522']
6	GO:BP	GO:0048856	anatomical structure development	2.4804e-37	TRUE	"The biological process whose specific outcome is the progression of an anatomical structure from an initial condition to its mature state. This process begins with the formation of the structure and ends with the mature structure, whatever form that may be including its natural destruction. An anatomical structure is any biological entity that occupies space and is distinguished from its surroun…	5987	1346	604	21118	0.448737	0.100885	query_1	['GO:0032502']
7	GO:BP	GO:0010604	positive regulation of macromolecule metabolic process	3.17139e-37	TRUE	"Any process that increases the frequency, rate or extent of the chemical reactions and pathways involving macromolecules, any molecule of high relative molecular mass, the structure of which essentially comprises the multiple repetition of units derived, actually or conceptually, from molecules of low relative molecular mass." [GOC:dph, GOC:tb]	3467	1346	411	21118	0.305349	0.118546	query_1	['GO:0009893', 'GO:0043170', 'GO:0060255']
8	GO:BP	GO:0048518	positive regulation of biological process	4.55807e-37	TRUE	"Any process that activates or increases the frequency, rate or extent of a biological process. Biological processes are regulated by many means; examples include the control of gene expression, protein modification or interaction with a protein or substrate molecule." [GOC:jid]	6305	1346	626	21118	0.465082	0.0992863	query_1	['GO:0008150', 'GO:0050789']
9	GO:BP	GO:0009653	anatomical structure morphogenesis	7.0533e-37	TRUE	"The process in which anatomical structures are generated and organized. Morphogenesis pertains to the creation of form." [GOC:go_curators, ISBN:0521436125]	2715	1346	347	21118	0.257801	0.127808	query_1	['GO:0032502', 'GO:0048856']
10	GO:BP	GO:0051173	positive regulation of nitrogen compound metabolic process	7.95133e-37	TRUE	"Any process that activates or increases the frequency, rate or extent of the chemical reactions and pathways involving nitrogen or nitrogenous compounds." [GOC:ai, GOC:tb]	3069	1346	377	21118	0.280089	0.122841	query_1	['GO:0006807', 'GO:0009893', 'GO:0051171']
11	GO:BP	GO:0048522	positive regulation of cellular process	2.93733e-36	TRUE	"Any process that activates or increases the frequency, rate or extent of a cellular process, any of those that are carried out at the cellular level, but are not necessarily restricted to a single cell. For example, cell communication occurs among more than one cell, but occurs at the cellular level." [GOC:jid]	5796	1346	587	21118	0.436107	0.101277	query_1	['GO:0009987', 'GO:0048518', 'GO:0050794']
12	GO:BP	GO:0048519	negative regulation of biological process	4.72949e-36	TRUE	"Any process that stops, prevents, or reduces the frequency, rate or extent of a biological process. Biological processes are regulated by many means; examples include the control of gene expression, protein modification or interaction with a protein or substrate molecule." [GOC:jid]	5544	1346	568	21118	0.421991	0.102453	query_1	['GO:0008150', 'GO:0050789']
13	GO:BP	GO:0031323	regulation of cellular metabolic process	1.35163e-35	TRUE	"Any process that modulates the frequency, rate or extent of the chemical reactions and pathways by which individual cells transform chemical substances." [GOC:mah]	6073	1346	605	21118	0.44948	0.0996213	query_1	['GO:0019222', 'GO:0044237', 'GO:0050794']
14	GO:BP	GO:0051254	positive regulation of RNA metabolic process	2.14682e-35	TRUE	"Any process that activates or increases the frequency, rate or extent of the chemical reactions and pathways involving RNA." [GOC:ai]	1745	1346	256	21118	0.190193	0.146705	query_1	['GO:0010604', 'GO:0016070', 'GO:0045935', 'GO:0051252']
15	GO:BP	GO:0019222	regulation of metabolic process	6.82172e-34	TRUE	"Any process that modulates the frequency, rate or extent of the chemical reactions and pathways within a cell or an organism." [GOC:go_curators]	6841	1346	654	21118	0.485884	0.0956001	query_1	['GO:0008152', 'GO:0050789']
16	GO:BP	GO:1902680	positive regulation of RNA biosynthetic process	1.19331e-33	TRUE	"Any process that activates or increases the frequency, rate or extent of RNA biosynthetic process." [GO:jl, GO_REF:0000058, GOC:TermGenie]	1617	1346	240	21118	0.178306	0.148423	query_1	['GO:0010557', 'GO:0031328', 'GO:0032774', 'GO:0051254', 'GO:2001141']
17	GO:BP	GO:0051171	regulation of nitrogen compound metabolic process	1.84869e-33	TRUE	"Any process that modulates the frequency, rate or extent of the chemical reactions and pathways involving nitrogen or nitrogenous compounds." [GOC:ai, GOC:tb]	5706	1346	572	21118	0.424963	0.100245	query_1	['GO:0006807', 'GO:0019222']
18	GO:BP	GO:0080090	regulation of primary metabolic process	1.87834e-33	TRUE	"Any process that modulates the frequency, rate or extent of the chemical reactions and pathways within a cell or an organism involving those compounds formed as a part of the normal anabolic and catabolic processes. These processes take place in most, if not all, cells of the organism." [PMID:19211694]	5886	1346	585	21118	0.434621	0.0993884	query_1	['GO:0019222', 'GO:0044238']
19	GO:BP	GO:0045893	positive regulation of transcription, DNA-templated	3.12845e-33	TRUE	"Any process that activates or increases the frequency, rate or extent of cellular DNA-templated transcription." [GOC:go_curators, GOC:txnOH]	1616	1346	239	21118	0.177563	0.147896	query_1	['GO:0006351', 'GO:0006355', 'GO:1903508']
20	GO:BP	GO:1903508	positive regulation of nucleic acid-templated transcription	3.12845e-33	TRUE	"Any process that activates or increases the frequency, rate or extent of nucleic acid-templated transcription." [GO_REF:0000058, GOC:pr, GOC:TermGenie, GOC:txnOH, GOC:vw]	1616	1346	239	21118	0.177563	0.147896	query_1	['GO:0097659', 'GO:1902680', 'GO:1903506']
21	GO:BP	GO:0048513	animal organ development	5.0789e-32	TRUE	"Development of a tissue or tissues that work together to perform a specific function or functions. Development pertains to the process whose specific outcome is the progression of a structure over time, from its formation to the mature structure. Organs are commonly observed as visibly distinct structures, but may also exist as loosely associated clusters of cells that work together to perform a…	3617	1346	409	21118	0.303863	0.113077	query_1	['GO:0048731', 'GO:0048856']
22	GO:BP	GO:0045935	positive regulation of nucleobase-containing compound metabolic process	5.21324e-32	TRUE	"Any cellular process that activates or increases the frequency, rate or extent of the chemical reactions and pathways involving nucleobases, nucleosides, nucleotides and nucleic acids." [GOC:go_curators]	1912	1346	264	21118	0.196137	0.138075	query_1	['GO:0006139', 'GO:0019219', 'GO:0031325', 'GO:0051173']
23	GO:BP	GO:0048869	cellular developmental process	6.92999e-32	TRUE	"A biological process whose specific outcome is the progression of a cell over time from an initial condition to a later condition." [GOC:isa_complete]	4454	1346	474	21118	0.352155	0.106421	query_1	['GO:0009987', 'GO:0032502']
24	GO:BP	GO:0030154	cell differentiation	7.95867e-32	TRUE	"The process in which relatively unspecialized cells, e.g. embryonic or regenerative cells, acquire specialized structural and/or functional features that characterize the cells, tissues, or organs of the mature organism or some other relatively stable phase of the organism's life history. Differentiation includes the processes involved in commitment of a cell to a specific fate and its subsequen…	4378	1346	468	21118	0.347697	0.106898	query_1	['GO:0048869']
25	GO:BP	GO:0009891	positive regulation of biosynthetic process	1.30532e-31	TRUE	"Any process that activates or increases the frequency, rate or extent of the chemical reactions and pathways resulting in the formation of substances." [GOC:go_curators]	1999	1346	271	21118	0.201337	0.135568	query_1	['GO:0009058', 'GO:0009889', 'GO:0009893']
26	GO:BP	GO:0010557	positive regulation of macromolecule biosynthetic process	2.95092e-31	TRUE	"Any process that increases the rate, frequency or extent of the chemical reactions and pathways resulting in the formation of a macromolecule, any molecule of high relative molecular mass, the structure of which essentially comprises the multiple repetition of units derived, actually or conceptually, from molecules of low relative molecular mass." [GOC:dph, GOC:tb]	1844	1346	256	21118	0.190193	0.138829	query_1	['GO:0009059', 'GO:0009891', 'GO:0010556', 'GO:0010604']
27	GO:BP	GO:0060255	regulation of macromolecule metabolic process	3.14116e-31	TRUE	"Any process that modulates the frequency, rate or extent of the chemical reactions and pathways involving macromolecules, any molecule of high relative molecular mass, the structure of which essentially comprises the multiple repetition of units derived, actually or conceptually, from molecules of low relative molecular mass." [GOC:dph, GOC:tb]	6363	1346	612	21118	0.454681	0.096181	query_1	['GO:0019222', 'GO:0043170']
28	GO:BP	GO:0050793	regulation of developmental process	3.55896e-31	TRUE	"Any process that modulates the frequency, rate or extent of development, the biological process whose specific outcome is the progression of a multicellular organism over time from an initial condition (e.g. a zygote, or a young adult) to a later condition (e.g. a multicellular animal or an aged adult)." [GOC:go_curators]	2591	1346	322	21118	0.239227	0.124276	query_1	['GO:0032502', 'GO:0050789']
29	GO:BP	GO:0031328	positive regulation of cellular biosynthetic process	3.7877e-31	TRUE	"Any process that activates or increases the frequency, rate or extent of the chemical reactions and pathways resulting in the formation of substances, carried out by individual cells." [GOC:mah]	1956	1346	266	21118	0.197623	0.135992	query_1	['GO:0009891', 'GO:0031325', 'GO:0031326', 'GO:0044249']
30	GO:BP	GO:0006366	transcription by RNA polymerase II	1.94684e-29	TRUE	"The synthesis of RNA from a DNA template by RNA polymerase II (RNAP II), originating at an RNA polymerase II promoter. Includes transcription of messenger RNA (mRNA) and certain small nuclear RNAs (snRNAs)." [GOC:jl, GOC:txnOH, ISBN:0321000382]	2492	1346	309	21118	0.229569	0.123997	query_1	['GO:0006351']
31	GO:BP	GO:0032774	RNA biosynthetic process	2.23347e-29	TRUE	"The chemical reactions and pathways resulting in the formation of RNA, ribonucleic acid, one of the two main type of nucleic acid, consisting of a long, unbranched macromolecule formed from ribonucleotides joined in 3',5'-phosphodiester linkage. Includes polymerization of ribonucleotide monomers. Refers not only to transcription but also to e.g. viral RNA replication." [GOC:mah, GOC:txnOH]	3549	1346	396	21118	0.294205	0.111581	query_1	['GO:0009059', 'GO:0016070', 'GO:0034654']
32	GO:BP	GO:0006357	regulation of transcription by RNA polymerase II	2.41012e-29	TRUE	"Any process that modulates the frequency, rate or extent of transcription mediated by RNA polymerase II." [GOC:go_curators, GOC:txnOH]	2425	1346	303	21118	0.225111	0.124948	query_1	['GO:0006355', 'GO:0006366']
33	GO:BP	GO:0051252	regulation of RNA metabolic process	2.75237e-29	TRUE	"Any process that modulates the frequency, rate or extent of the chemical reactions and pathways involving RNA." [GOC:ai]	3691	1346	407	21118	0.302377	0.110268	query_1	['GO:0016070', 'GO:0019219', 'GO:0060255']
34	GO:BP	GO:0006351	transcription, DNA-templated	1.78996e-28	TRUE	"The cellular synthesis of RNA on a template of DNA." [GOC:jl, GOC:txnOH]	3532	1346	392	21118	0.291233	0.110985	query_1	['GO:0010467', 'GO:0034645', 'GO:0097659']
35	GO:BP	GO:0097659	nucleic acid-templated transcription	2.02679e-28	TRUE	"The cellular synthesis of RNA on a template of nucleic acid (DNA or RNA)." [GOC:pr, GOC:txnOH, GOC:vw]	3534	1346	392	21118	0.291233	0.110922	query_1	['GO:0032774']
36	GO:BP	GO:0016070	RNA metabolic process	6.61132e-28	TRUE	"The cellular chemical reactions and pathways involving RNA, ribonucleic acid, one of the two main type of nucleic acid, consisting of a long, unbranched macromolecule formed from ribonucleotides joined in 3',5'-phosphodiester linkage." [ISBN:0198506732]	4470	1346	463	21118	0.343982	0.103579	query_1	['GO:0090304']
37	GO:BP	GO:2001141	regulation of RNA biosynthetic process	7.49325e-28	TRUE	"Any process that modulates the frequency, rate or extent of RNA biosynthetic process." [GOC:dph]	3417	1346	381	21118	0.283061	0.111501	query_1	['GO:0010556', 'GO:0031326', 'GO:0032774', 'GO:0051252']
38	GO:BP	GO:0010468	regulation of gene expression	8.58689e-28	TRUE	"Any process that modulates the frequency, rate or extent of gene expression. Gene expression is the process in which a gene's coding sequence is converted into a mature gene product or products (proteins or RNA). This includes the production of an RNA transcript as well as any processing to produce a mature RNA product or an mRNA or circRNA (for protein-coding genes) and the translation of that …	4888	1346	494	21118	0.367013	0.101064	query_1	['GO:0010467', 'GO:0060255']
39	GO:BP	GO:0019219	regulation of nucleobase-containing compound metabolic process	1.08434e-27	TRUE	"Any cellular process that modulates the frequency, rate or extent of the chemical reactions and pathways involving nucleobases, nucleosides, nucleotides and nucleic acids." [GOC:go_curators]	3931	1346	421	21118	0.312779	0.107097	query_1	['GO:0006139', 'GO:0031323', 'GO:0051171', 'GO:0080090']
40	GO:BP	GO:0006355	regulation of transcription, DNA-templated	2.4496e-27	TRUE	"Any process that modulates the frequency, rate or extent of cellular DNA-templated transcription." [GOC:go_curators, GOC:txnOH]	3411	1346	379	21118	0.281575	0.111111	query_1	['GO:0006351', 'GO:0010468', 'GO:1903506', 'GO:2000112']
41	GO:BP	GO:0045944	positive regulation of transcription by RNA polymerase II	2.51026e-27	TRUE	"Any process that activates or increases the frequency, rate or extent of transcription from an RNA polymerase II promoter." [GOC:go_curators, GOC:txnOH]	1253	1346	191	21118	0.141902	0.152434	query_1	['GO:0006357', 'GO:0006366', 'GO:0045893']
42	GO:BP	GO:0009889	regulation of biosynthetic process	2.66771e-27	TRUE	"Any process that modulates the frequency, rate or extent of the chemical reactions and pathways resulting in the formation of substances." [GOC:go_curators]	4167	1346	438	21118	0.325409	0.105112	query_1	['GO:0009058', 'GO:0019222']
43	GO:BP	GO:1903506	regulation of nucleic acid-templated transcription	2.77241e-27	TRUE	"Any process that modulates the frequency, rate or extent of nucleic acid-templated transcription." [GO_REF:0000058, GOC:pr, GOC:TermGenie, GOC:txnOH, GOC:vw]	3413	1346	379	21118	0.281575	0.111046	query_1	['GO:0097659', 'GO:2001141']
44	GO:BP	GO:0044260	cellular macromolecule metabolic process	3.69259e-27	TRUE	"The chemical reactions and pathways involving macromolecules, any molecule of high relative molecular mass, the structure of which essentially comprises the multiple repetition of units derived, actually or conceptually, from molecules of low relative molecular mass, as carried out by individual cells." [GOC:mah]	7962	1346	708	21118	0.526003	0.0889224	query_1	['GO:0043170', 'GO:0044237']
45	GO:BP	GO:0031326	regulation of cellular biosynthetic process	1.09986e-26	TRUE	"Any process that modulates the frequency, rate or extent of the chemical reactions and pathways resulting in the formation of substances, carried out by individual cells." [GOC:mah]	4088	1346	430	21118	0.319465	0.105186	query_1	['GO:0009889', 'GO:0031323', 'GO:0044249']
46	GO:BP	GO:0044237	cellular metabolic process	1.48326e-26	TRUE	"The chemical reactions and pathways by which individual cells transform chemical substances." [GOC:go_curators]	10350	1346	860	21118	0.63893	0.0830918	query_1	['GO:0008152', 'GO:0009987']
47	GO:BP	GO:1901362	organic cyclic compound biosynthetic process	5.13065e-26	TRUE	"The chemical reactions and pathways resulting in the formation of organic cyclic compound." [GOC:TermGenie]	4181	1346	435	21118	0.32318	0.104042	query_1	['GO:1901360', 'GO:1901576']
48	GO:BP	GO:0051239	regulation of multicellular organismal process	8.1126e-26	TRUE	"Any process that modulates the frequency, rate or extent of a multicellular organismal process, the processes pertinent to the function of a multicellular organism above the cellular level; includes the integrated processes of tissues and organs." [GOC:ai, GOC:dph, GOC:tb]	2788	1346	324	21118	0.240713	0.116212	query_1	['GO:0032501', 'GO:0050789']
49	GO:BP	GO:2000112	regulation of cellular macromolecule biosynthetic process	9.48878e-26	TRUE	"Any process that modulates the frequency, rate or extent of cellular macromolecule biosynthetic process." [GOC:obol]	3880	1346	411	21118	0.305349	0.105928	query_1	['GO:0010556', 'GO:0031326', 'GO:0034645']
50	GO:BP	GO:0051172	negative regulation of nitrogen compound metabolic process	1.21884e-25	TRUE	"Any process that stops, prevents, or reduces the frequency, rate or extent of the chemical reactions and pathways involving nitrogen or nitrogenous compounds." [GOC:ai, GOC:tb]	2542	1346	303	21118	0.225111	0.119197	query_1	['GO:0006807', 'GO:0009892', 'GO:0051171']
51	GO:BP	GO:0010556	regulation of macromolecule biosynthetic process	1.41912e-25	TRUE	"Any process that modulates the rate, frequency or extent of the chemical reactions and pathways resulting in the formation of a macromolecule, any molecule of high relative molecular mass, the structure of which essentially comprises the multiple repetition of units derived, actually or conceptually, from molecules of low relative molecular mass." [GOC:dph, GOC:tb]	3913	1346	413	21118	0.306835	0.105546	query_1	['GO:0009059', 'GO:0009889', 'GO:0060255']
52	GO:BP	GO:0034654	nucleobase-containing compound biosynthetic process	2.63877e-25	TRUE	"The chemical reactions and pathways resulting in the formation of nucleobases, nucleosides, nucleotides and nucleic acids." [GOC:mah]	3963	1346	416	21118	0.309064	0.104971	query_1	['GO:0006139', 'GO:0018130', 'GO:0019438', 'GO:0044271', 'GO:1901362']
53	GO:BP	GO:0019438	aromatic compound biosynthetic process	5.68344e-25	TRUE	"The chemical reactions and pathways resulting in the formation of aromatic compounds, any substance containing an aromatic carbon ring." [GOC:ai]	4042	1346	421	21118	0.312779	0.104156	query_1	['GO:0006725', 'GO:0044249']
54	GO:BP	GO:0018130	heterocycle biosynthetic process	1.09818e-24	TRUE	"The chemical reactions and pathways resulting in the formation of heterocyclic compounds, those with a cyclic molecular structure and at least two different atoms in the ring (or rings)." [ISBN:0198547684]	4028	1346	419	21118	0.311293	0.104022	query_1	['GO:0044249', 'GO:0046483']
55	GO:BP	GO:0031324	negative regulation of cellular metabolic process	1.1303e-24	TRUE	"Any process that stops, prevents, or reduces the frequency, rate or extent of the chemical reactions and pathways by which individual cells transform chemical substances." [GOC:mah]	2731	1346	316	21118	0.23477	0.115709	query_1	['GO:0009892', 'GO:0031323', 'GO:0044237', 'GO:0048523']
56	GO:BP	GO:0090304	nucleic acid metabolic process	2.36232e-24	TRUE	"Any cellular metabolic process involving nucleic acids." [GOC:dph, GOC:tb]	4962	1346	488	21118	0.362556	0.0983474	query_1	['GO:0006139', 'GO:0043170']
57	GO:BP	GO:0007399	nervous system development	2.80598e-24	TRUE	"The process whose specific outcome is the progression of nervous tissue over time, from its formation to its mature state." [GOC:dgh]	2421	1346	289	21118	0.21471	0.119372	query_1	['GO:0048731']
58	GO:BP	GO:0009888	tissue development	2.8982e-24	TRUE	"The process whose specific outcome is the progression of a tissue over time, from its formation to the mature structure." [ISBN:0471245208]	1923	1346	246	21118	0.182764	0.127925	query_1	['GO:0048856']
59	GO:BP	GO:0008152	metabolic process	3.20675e-24	TRUE	"The chemical reactions and pathways, including anabolism and catabolism, by which living organisms transform chemical substances. Metabolic processes typically transform small molecules, but also include macromolecular processes such as DNA repair and replication, and protein synthesis and degradation." [GOC:go_curators, ISBN:0198547684]	11429	1346	918	21118	0.682021	0.080322	query_1	['GO:0008150']
60	GO:BP	GO:0071704	organic substance metabolic process	3.56374e-24	TRUE	"The chemical reactions and pathways involving an organic substance, any molecular entity containing carbon." [GOC:mah]	10989	1346	891	21118	0.661961	0.0810811	query_1	['GO:0008152']
61	GO:BP	GO:0043170	macromolecule metabolic process	5.3864e-24	TRUE	"The chemical reactions and pathways involving macromolecules, any molecule of high relative molecular mass, the structure of which essentially comprises the multiple repetition of units derived, actually or conceptually, from molecules of low relative molecular mass." [GOC:mah]	9484	1346	796	21118	0.591382	0.0839308	query_1	['GO:0071704']
62	GO:BP	GO:0006725	cellular aromatic compound metabolic process	7.0702e-24	TRUE	"The chemical reactions and pathways involving aromatic compounds, any organic compound characterized by one or more planar rings, each of which contains conjugated double bonds and delocalized pi electrons, as carried out by individual cells." [GOC:ai, ISBN:0198506732]	5618	1346	534	21118	0.396731	0.0950516	query_1	['GO:0044237']
63	GO:BP	GO:1901360	organic cyclic compound metabolic process	7.48841e-24	TRUE	"The chemical reactions and pathways involving organic cyclic compound." [GOC:TermGenie]	5829	1346	549	21118	0.407875	0.0941843	query_1	['GO:0071704']
64	GO:BP	GO:0006807	nitrogen compound metabolic process	8.87011e-24	TRUE	"The chemical reactions and pathways involving organic or inorganic compounds that contain nitrogen." [GOC:jl, ISBN:0198506732]	9669	1346	807	21118	0.599554	0.0834626	query_1	['GO:0008152']
65	GO:BP	GO:0010646	regulation of cell communication	5.87118e-23	TRUE	"Any process that modulates the frequency, rate or extent of cell communication. Cell communication is the process that mediates interactions between a cell and its surroundings. Encompasses interactions such as signaling or attachment between one cell and another cell, between a cell and an extracellular matrix, or between a cell and any other aspect of its environment." [GOC:dph, GOC:tb]	3265	1346	354	21118	0.263001	0.108423	query_1	['GO:0007154', 'GO:0050794']
66	GO:BP	GO:0051253	negative regulation of RNA metabolic process	5.92183e-23	TRUE	"Any process that stops, prevents, or reduces the frequency, rate or extent of the chemical reactions and pathways involving RNA." [GOC:ai]	1505	1346	205	21118	0.152303	0.136213	query_1	['GO:0010605', 'GO:0016070', 'GO:0045934', 'GO:0051252']
67	GO:BP	GO:0044238	primary metabolic process	6.58602e-23	TRUE	"The chemical reactions and pathways involving those compounds which are formed as a part of the normal anabolic and catabolic processes. These processes take place in most, if not all, cells of the organism." [GOC:go_curators, http://www.metacyc.org]	10243	1346	840	21118	0.624071	0.0820072	query_1	['GO:0008152']
68	GO:BP	GO:0044249	cellular biosynthetic process	8.75615e-23	TRUE	"The chemical reactions and pathways resulting in the formation of substances, carried out by individual cells." [GOC:jl]	5715	1346	537	21118	0.39896	0.0939633	query_1	['GO:0009058', 'GO:0044237']
69	GO:BP	GO:0042127	regulation of cell population proliferation	9.30006e-23	TRUE	"Any process that modulates the frequency, rate or extent of cell proliferation." [GOC:jl]	1753	1346	227	21118	0.168648	0.129492	query_1	['GO:0008283', 'GO:0050794']
70	GO:BP	GO:0010605	negative regulation of macromolecule metabolic process	1.02166e-22	TRUE	"Any process that decreases the frequency, rate or extent of the chemical reactions and pathways involving macromolecules, any molecule of high relative molecular mass, the structure of which essentially comprises the multiple repetition of units derived, actually or conceptually, from molecules of low relative molecular mass." [GOC:dph, GOC:tb]	2999	1346	332	21118	0.246657	0.110704	query_1	['GO:0009892', 'GO:0043170', 'GO:0060255']
71	GO:BP	GO:0006139	nucleobase-containing compound metabolic process	1.23665e-22	TRUE	"Any cellular metabolic process involving nucleobases, nucleosides, nucleotides and nucleic acids." [GOC:ai]	5416	1346	515	21118	0.382615	0.0950886	query_1	['GO:0006725', 'GO:0034641', 'GO:0044238', 'GO:0046483', 'GO:1901360']
72	GO:BP	GO:0009058	biosynthetic process	1.52804e-22	TRUE	"The chemical reactions and pathways resulting in the formation of substances; typically the energy-requiring part of metabolism in which simpler substances are transformed into more complex ones." [GOC:curators, ISBN:0198547684]	5882	1346	548	21118	0.407132	0.0931656	query_1	['GO:0008152']
73	GO:BP	GO:0023051	regulation of signaling	2.28575e-22	TRUE	"Any process that modulates the frequency, rate or extent of a signaling process." [GOC:mtg_signal]	3276	1346	353	21118	0.262259	0.107753	query_1	['GO:0023052', 'GO:0050789']
74	GO:BP	GO:0009892	negative regulation of metabolic process	2.40634e-22	TRUE	"Any process that stops, prevents, or reduces the frequency, rate or extent of the chemical reactions and pathways within a cell or an organism." [GOC:go_curators]	3239	1346	350	21118	0.26003	0.108058	query_1	['GO:0008152', 'GO:0019222', 'GO:0048519']
75	GO:BP	GO:0010467	gene expression	4.16503e-22	TRUE	"The process in which a gene's sequence is converted into a mature gene product or products (proteins or RNA). This includes the production of an RNA transcript as well as any processing to produce a mature RNA product or an mRNA or circRNA (for protein-coding genes) and the translation of that mRNA or circRNA into protein. Protein maturation is included when required to form an active form of a …	5933	1346	550	21118	0.408618	0.0927018	query_1	['GO:0043170']
76	GO:BP	GO:0008283	cell population proliferation	4.9556e-22	TRUE	"The multiplication or reproduction of cells, resulting in the expansion of a cell population." [GOC:mah, GOC:mb]	2072	1346	253	21118	0.187964	0.122104	query_1	['GO:0009987']
77	GO:BP	GO:0022008	neurogenesis	5.6709e-22	TRUE	"Generation of cells within the nervous system." [GO_REF:0000021, GOC:cls, GOC:curators, GOC:dgh, GOC:dph, GOC:jid]	1776	1346	227	21118	0.168648	0.127815	query_1	['GO:0007399', 'GO:0030154']
78	GO:BP	GO:0046483	heterocycle metabolic process	6.19408e-22	TRUE	"The chemical reactions and pathways involving heterocyclic compounds, those with a cyclic molecular structure and at least two different atoms in the ring (or rings)." [ISBN:0198506732]	5535	1346	521	21118	0.387073	0.0941283	query_1	['GO:0044237']
79	GO:BP	GO:0009059	macromolecule biosynthetic process	7.36663e-22	TRUE	"The chemical reactions and pathways resulting in the formation of a macromolecule, any molecule of high relative molecular mass, the structure of which essentially comprises the multiple repetition of units derived, actually or conceptually, from molecules of low relative molecular mass." [GOC:mah]	4782	1346	466	21118	0.346211	0.0974488	query_1	['GO:0043170', 'GO:1901576']
80	GO:BP	GO:1901576	organic substance biosynthetic process	8.07144e-22	TRUE	"The chemical reactions and pathways resulting in the formation of an organic substance, any molecular entity containing carbon." [GOC:pr, GOC:TermGenie]	5779	1346	538	21118	0.399703	0.0930957	query_1	['GO:0009058', 'GO:0071704']
81	GO:BP	GO:0034645	cellular macromolecule biosynthetic process	8.37053e-22	TRUE	"The chemical reactions and pathways resulting in the formation of a macromolecule, any molecule of high relative molecular mass, the structure of which essentially comprises the multiple repetition of units derived, actually or conceptually, from molecules of low relative molecular mass, carried out by individual cells." [GOC:mah]	4744	1346	463	21118	0.343982	0.097597	query_1	['GO:0009059', 'GO:0044249', 'GO:0044260']
82	GO:BP	GO:0045934	negative regulation of nucleobase-containing compound metabolic process	1.1475e-21	TRUE	"Any cellular process that stops, prevents, or reduces the frequency, rate or extent of the chemical reactions and pathways involving nucleobases, nucleosides, nucleotides and nucleic acids." [GOC:go_curators]	1606	1346	211	21118	0.156761	0.131382	query_1	['GO:0006139', 'GO:0019219', 'GO:0031324', 'GO:0051172']
83	GO:BP	GO:0045892	negative regulation of transcription, DNA-templated	1.31699e-21	TRUE	"Any process that stops, prevents, or reduces the frequency, rate or extent of cellular DNA-templated transcription." [GOC:go_curators, GOC:txnOH]	1400	1346	192	21118	0.142645	0.137143	query_1	['GO:0006351', 'GO:0006355', 'GO:1903507', 'GO:2000113']
84	GO:BP	GO:1903507	negative regulation of nucleic acid-templated transcription	1.56911e-21	TRUE	"Any process that stops, prevents or reduces the frequency, rate or extent of nucleic acid-templated transcription." [GO_REF:0000058, GOC:pr, GOC:TermGenie, GOC:txnOH, GOC:vw]	1402	1346	192	21118	0.142645	0.136947	query_1	['GO:0097659', 'GO:1902679', 'GO:1903506']
85	GO:BP	GO:1902679	negative regulation of RNA biosynthetic process	1.71244e-21	TRUE	"Any process that stops, prevents or reduces the frequency, rate or extent of RNA biosynthetic process." [GO:jl, GO_REF:0000058, GOC:TermGenie]	1403	1346	192	21118	0.142645	0.13685	query_1	['GO:0010558', 'GO:0031327', 'GO:0032774', 'GO:0051253', 'GO:2001141']
86	GO:BP	GO:0009966	regulation of signal transduction	2.36263e-21	TRUE	"Any process that modulates the frequency, rate or extent of signal transduction." [GOC:sm]	2853	1346	316	21118	0.23477	0.110761	query_1	['GO:0007165', 'GO:0010646', 'GO:0023051', 'GO:0048583']
87	GO:BP	GO:0045595	regulation of cell differentiation	2.49464e-21	TRUE	"Any process that modulates the frequency, rate or extent of cell differentiation, the process in which relatively unspecialized cells acquire specialized structural and functional features." [GOC:go_curators]	1649	1346	214	21118	0.15899	0.129776	query_1	['GO:0030154', 'GO:0050793', 'GO:0050794']
88	GO:BP	GO:0035295	tube development	3.88581e-21	TRUE	"The process whose specific outcome is the progression of a tube over time, from its initial formation to a mature structure. Epithelial and endothelial tubes transport gases, liquids and cells from one site to another and form the basic structure of many organs and tissues including lung and trachea, kidney, the mammary gland, the vascular system and the gastrointestinal and urinary-genital trac…	1137	1346	166	21118	0.123328	0.145998	query_1	['GO:0007275', 'GO:0048856']
89	GO:BP	GO:2000113	negative regulation of cellular macromolecule biosynthetic process	7.27421e-21	TRUE	"Any process that stops, prevents, or reduces the frequency, rate or extent of cellular macromolecule biosynthetic process." [GOC:obol]	1629	1346	211	21118	0.156761	0.129527	query_1	['GO:0010558', 'GO:0031327', 'GO:0034645', 'GO:2000112']
90	GO:BP	GO:0009890	negative regulation of biosynthetic process	1.03515e-20	TRUE	"Any process that stops, prevents, or reduces the rate of the chemical reactions and pathways resulting in the formation of substances." [GOC:go_curators]	1746	1346	221	21118	0.16419	0.126575	query_1	['GO:0009058', 'GO:0009889', 'GO:0009892']
91	GO:BP	GO:0031327	negative regulation of cellular biosynthetic process	1.22515e-20	TRUE	"Any process that stops, prevents, or reduces the frequency, rate or extent of the chemical reactions and pathways resulting in the formation of substances, carried out by individual cells." [GOC:mah]	1703	1346	217	21118	0.161218	0.127422	query_1	['GO:0009890', 'GO:0031324', 'GO:0031326', 'GO:0044249']
92	GO:BP	GO:0071840	cellular component organization or biogenesis	1.31473e-20	TRUE	"A process that results in the biosynthesis of constituent macromolecules, assembly, arrangement of constituent parts, or disassembly of a cellular component." [GOC:mah]	6270	1346	568	21118	0.421991	0.0905901	query_1	['GO:0009987']
93	GO:BP	GO:0010558	negative regulation of macromolecule biosynthetic process	2.1845e-20	TRUE	"Any process that decreases the rate, frequency or extent of the chemical reactions and pathways resulting in the formation of a macromolecule, any molecule of high relative molecular mass, the structure of which essentially comprises the multiple repetition of units derived, actually or conceptually, from molecules of low relative molecular mass." [GOC:dph, GOC:tb]	1643	1346	211	21118	0.156761	0.128424	query_1	['GO:0009059', 'GO:0009890', 'GO:0010556', 'GO:0010605']
94	GO:BP	GO:0030182	neuron differentiation	3.72417e-20	TRUE	"The process in which a relatively unspecialized cell acquires specialized features of a neuron." [GOC:mah]	1472	1346	195	21118	0.144874	0.132473	query_1	['GO:0030154', 'GO:0048699']
95	GO:BP	GO:0050789	regulation of biological process	7.22121e-20	TRUE	"Any process that modulates the frequency, rate or extent of a biological process. Biological processes are regulated by many means; examples include the control of gene expression, protein modification or interaction with a protein or substrate molecule." [GOC:ai, GOC:go_curators]	12686	1346	977	21118	0.725854	0.077014	query_1	['GO:0008150', 'GO:0065007']
96	GO:BP	GO:0048699	generation of neurons	7.23441e-20	TRUE	"The process in which nerve cells are generated. This includes the production of neuroblasts and their differentiation into neurons." [GOC:nln]	1636	1346	209	21118	0.155275	0.127751	query_1	['GO:0022008']
97	GO:BP	GO:0044271	cellular nitrogen compound biosynthetic process	7.61146e-20	TRUE	"The chemical reactions and pathways resulting in the formation of organic and inorganic nitrogenous compounds." [GOC:jl, ISBN:0198506732]	4705	1346	453	21118	0.336553	0.0962806	query_1	['GO:0034641', 'GO:0044249']
98	GO:BP	GO:0016043	cellular component organization	3.10309e-19	TRUE	"A process that results in the assembly, arrangement of constituent parts, or disassembly of a cellular component." [GOC:ai, GOC:jl, GOC:mah]	6090	1346	550	21118	0.408618	0.090312	query_1	['GO:0071840']
99	GO:BP	GO:0000122	negative regulation of transcription by RNA polymerase II	5.50104e-19	TRUE	"Any process that stops, prevents, or reduces the frequency, rate or extent of transcription mediated by RNA polymerase II." [GOC:go_curators, GOC:txnOH]	931	1346	141	21118	0.104755	0.15145	query_1	['GO:0006357', 'GO:0006366', 'GO:0045892']
100	GO:BP	GO:0071310	cellular response to organic substance	5.75967e-19	TRUE	"Any process that results in a change in state or activity of a cell (in terms of movement, secretion, enzyme production, gene expression, etc.) as a result of an organic substance stimulus." [GOC:mah]	2453	1346	276	21118	0.205052	0.112515	query_1	['GO:0010033', 'GO:0070887']
101	GO:BP	GO:0048468	cell development	9.63629e-19	TRUE	"The process whose specific outcome is the progression of the cell over time, from its formation to the mature structure. Cell development does not include the steps involved in committing a cell to a specific fate." [GOC:go_curators]	2340	1346	266	21118	0.197623	0.113675	query_1	['GO:0030154', 'GO:0048856', 'GO:0048869']
102	GO:BP	GO:0016477	cell migration	1.01645e-18	TRUE	"The controlled self-propelled movement of a cell from one site to a destination guided by molecular cues. Cell migration is a central process in the development and maintenance of multicellular organisms." [GOC:cjm, GOC:dph, GOC:ems, GOC:pf, Wikipedia:Cell_migration]	1491	1346	193	21118	0.143388	0.129443	query_1	['GO:0048870']
103	GO:BP	GO:0050794	regulation of cellular process	1.03762e-18	TRUE	"Any process that modulates the frequency, rate or extent of a cellular process, any of those that are carried out at the cellular level, but are not necessarily restricted to a single cell. For example, cell communication occurs among more than one cell, but occurs at the cellular level." [GOC:go_curators]	12140	1346	940	21118	0.698366	0.07743	query_1	['GO:0009987', 'GO:0050789']
104	GO:BP	GO:0007166	cell surface receptor signaling pathway	1.11419e-18	TRUE	"A series of molecular signals initiated by activation of a receptor on the surface of a cell. The pathway begins with binding of an extracellular ligand to a cell surface receptor, or for receptors that signal in the absence of a ligand, by ligand-withdrawal or the activity of a constitutively active receptor. The pathway ends with regulation of a downstream cellular process, e.g. transcription.…	2673	1346	293	21118	0.217682	0.109615	query_1	['GO:0007165']
105	GO:BP	GO:0035239	tube morphogenesis	1.58203e-18	TRUE	"The process in which the anatomical structures of a tube are generated and organized. Epithelial and endothelial tubes transport gases, liquids and cells from one site to another and form the basic structure of many organs and tissues, with tube shape and organization varying from the single-celled excretory organ in Caenorhabditis elegans to the branching trees of the mammalian kidney and insec…	911	1346	138	21118	0.102526	0.151482	query_1	['GO:0009653', 'GO:0035295']
106	GO:BP	GO:0065007	biological regulation	1.6953e-18	TRUE	"Any process that modulates a measurable attribute of any biological process, quality or function." [GOC:dph, GOC:isa_complete, GOC:mah, GOC:pr, GOC:vw]	13374	1346	1012	21118	0.751857	0.0756692	query_1	['GO:0008150']
107	GO:BP	GO:0006928	movement of cell or subcellular component	1.87673e-18	TRUE	"The directed, self-propelled movement of a cell or subcellular component without the involvement of an external agent such as a transporter or a pore." [GOC:dgh, GOC:dph, GOC:jl, GOC:mlg]	2075	1346	243	21118	0.180535	0.117108	query_1	['GO:0009987']
108	GO:BP	GO:0034641	cellular nitrogen compound metabolic process	2.66188e-18	TRUE	"The chemical reactions and pathways involving various organic and inorganic nitrogenous compounds, as carried out by individual cells." [GOC:mah]	6201	1346	554	21118	0.41159	0.0893404	query_1	['GO:0006807', 'GO:0044237']
109	GO:BP	GO:0070887	cellular response to chemical stimulus	3.74386e-18	TRUE	"Any process that results in a change in state or activity of a cell (in terms of movement, secretion, enzyme production, gene expression, etc.) as a result of a chemical stimulus." [GOC:mah]	3097	1346	325	21118	0.241456	0.10494	query_1	['GO:0042221', 'GO:0051716']
110	GO:BP	GO:0040011	locomotion	3.81021e-18	TRUE	"Self-propelled movement of a cell or organism from one location to another." [GOC:dgh]	1839	1346	222	21118	0.164933	0.120718	query_1	['GO:0008150']
111	GO:BP	GO:0051094	positive regulation of developmental process	5.28656e-18	TRUE	"Any process that activates or increases the rate or extent of development, the biological process whose specific outcome is the progression of an organism over time from an initial condition (e.g. a zygote, or a young adult) to a later condition (e.g. a multicellular animal or an aged adult)." [GOC:ai]	1412	1346	184	21118	0.136701	0.130312	query_1	['GO:0032502', 'GO:0048518', 'GO:0050793']
112	GO:BP	GO:0040007	growth	1.16155e-17	TRUE	"The increase in size or mass of an entire organism, a part of an organism or a cell." [GOC:bf, GOC:ma]	1013	1346	146	21118	0.10847	0.144126	query_1	['GO:0008150']
113	GO:BP	GO:0072359	circulatory system development	9.44211e-17	TRUE	"The process whose specific outcome is the progression of the circulatory system over time, from its formation to the mature structure. The circulatory system is the organ system that passes nutrients (such as amino acids and electrolytes), gases, hormones, blood cells, etc. to and from cells in the body to help fight diseases and help stabilize body temperature and pH to maintain homeostasis." […	1174	1346	159	21118	0.118128	0.135434	query_1	['GO:0048731']
114	GO:BP	GO:0048666	neuron development	1.07657e-16	TRUE	"The process whose specific outcome is the progression of a neuron over time, from initial commitment of the cell to a specific fate, to the fully functional differentiated cell." [GOC:dph]	1208	1346	162	21118	0.120357	0.134106	query_1	['GO:0030182', 'GO:0048468']
115	GO:BP	GO:2000026	regulation of multicellular organismal development	1.48277e-16	TRUE	"Any process that modulates the frequency, rate or extent of multicellular organismal development." [GOC:obol]	1444	1346	183	21118	0.135958	0.126731	query_1	['GO:0007275', 'GO:0050793', 'GO:0051239']
116	GO:BP	GO:0048583	regulation of response to stimulus	1.62249e-16	TRUE	"Any process that modulates the frequency, rate or extent of a response to a stimulus. Response to stimulus is a change in state or activity of a cell or an organism (in terms of movement, secretion, enzyme production, gene expression, etc.) as a result of a stimulus." [GOC:jid]	3851	1346	377	21118	0.280089	0.0978967	query_1	['GO:0050789', 'GO:0050896']
117	GO:BP	GO:0051674	localization of cell	4.42598e-16	TRUE	"Any process in which a cell is transported to, and/or maintained in, a specific location." [GOC:ai]	1653	1346	200	21118	0.148588	0.120992	query_1	['GO:0009987', 'GO:0051179']
118	GO:BP	GO:0048870	cell motility	4.42598e-16	TRUE	"Any process involved in the controlled self-propelled movement of a cell that results in translocation of the cell from one place to another." [GOC:dgh, GOC:dph, GOC:isa_complete, GOC:mlg]	1653	1346	200	21118	0.148588	0.120992	query_1	['GO:0006928', 'GO:0040011', 'GO:0051674']
119	GO:BP	GO:0048589	developmental growth	6.69143e-16	TRUE	"The increase in size or mass of an entire organism, a part of an organism or a cell, where the increase in size or mass has the specific outcome of the progression of the organism over time from one condition to another." [GOC:go_curators]	739	1346	115	21118	0.0854383	0.155616	query_1	['GO:0032502', 'GO:0040007']
120	GO:BP	GO:0048646	anatomical structure formation involved in morphogenesis	6.73577e-16	TRUE	"The developmental process pertaining to the initial formation of an anatomical structure from unspecified parts. This process begins with the specific processes that contribute to the appearance of the discrete structure and ends when the structural rudiment is recognizable. An anatomical structure is any biological entity that occupies space and is distinguished from its surroundings. Anatomica…	1165	1346	156	21118	0.115899	0.133906	query_1	['GO:0009653', 'GO:0032502']
121	GO:BP	GO:0045597	positive regulation of cell differentiation	7.29758e-16	TRUE	"Any process that activates or increases the frequency, rate or extent of cell differentiation." [GOC:go_curators]	922	1346	133	21118	0.0988113	0.144252	query_1	['GO:0030154', 'GO:0045595', 'GO:0048522', 'GO:0051094']
122	GO:BP	GO:0009887	animal organ morphogenesis	8.06223e-16	TRUE	"Morphogenesis of an animal organ. An organ is defined as a tissue or set of tissues that work together to perform a specific function or functions. Morphogenesis is the process in which anatomical structures are generated and organized. Organs are commonly observed as visibly distinct structures, but may also exist as loosely associated clusters of cells that work together to perform a specific …	1049	1346	145	21118	0.107727	0.138227	query_1	['GO:0009653', 'GO:0048513']
123	GO:BP	GO:0001944	vasculature development	1.04433e-15	TRUE	"The process whose specific outcome is the progression of the vasculature over time, from its formation to the mature structure. The vasculature is an interconnected tubular multi-tissue structure that contains fluid that is actively transported around the organism." [GOC:dph, UBERON:0002409]	773	1346	118	21118	0.0876672	0.152652	query_1	['GO:0048731', 'GO:0072359']
124	GO:BP	GO:0060429	epithelium development	1.10504e-15	TRUE	"The process whose specific outcome is the progression of an epithelium over time, from its formation to the mature structure. An epithelium is a tissue that covers the internal or external surfaces of an anatomical structure." [GOC:dph, GOC:mtg_lung]	1171	1346	156	21118	0.115899	0.133219	query_1	['GO:0009888']
125	GO:BP	GO:0031175	neuron projection development	1.39977e-15	TRUE	"The process whose specific outcome is the progression of a neuron projection over time, from its formation to the mature structure. A neuron projection is any process extending from a neural cell, such as axons or dendrites (collectively called neurites)." [GOC:mah]	1066	1346	146	21118	0.10847	0.136961	query_1	['GO:0048666', 'GO:0120036']
126	GO:BP	GO:0010941	regulation of cell death	1.41086e-15	TRUE	"Any process that modulates the rate or frequency of cell death. Cell death is the specific activation or halting of processes within a cell so that its vital functions markedly cease, rather than simply deteriorating gradually over time, which culminates in cell death." [GOC:dph, GOC:tb]	1740	1346	206	21118	0.153046	0.118391	query_1	['GO:0008219', 'GO:0050794']
127	GO:BP	GO:0009719	response to endogenous stimulus	2.26223e-15	TRUE	"Any process that results in a change in state or activity of a cell or an organism (in terms of movement, secretion, enzyme production, gene expression, etc.) as a result of a stimulus arising within the organism." [GOC:sm]	1619	1346	195	21118	0.144874	0.120445	query_1	['GO:0050896']
128	GO:BP	GO:0006464	cellular protein modification process	2.3008e-15	TRUE	"The covalent alteration of one or more amino acids occurring in proteins, peptides and nascent polypeptides (co-translational, post-translational modifications) occurring at the level of an individual cell. Includes the modification of charged tRNAs that are destined to occur in a protein (pre-translation modification)." [GOC:go_curators]	3644	1346	357	21118	0.26523	0.0979693	query_1	['GO:0036211', 'GO:0044267']
129	GO:BP	GO:0036211	protein modification process	2.3008e-15	TRUE	"The covalent alteration of one or more amino acids occurring in proteins, peptides and nascent polypeptides (co-translational, post-translational modifications). Includes the modification of charged tRNAs that are destined to occur in a protein (pre-translation modification)." [GOC:bf, GOC:jl]	3644	1346	357	21118	0.26523	0.0979693	query_1	['GO:0019538', 'GO:0043412']
130	GO:BP	GO:0031399	regulation of protein modification process	4.56398e-15	TRUE	"Any process that modulates the frequency, rate or extent of the covalent alteration of one or more amino acid residues within a protein." [GOC:mah, GOC:tb]	1641	1346	196	21118	0.145617	0.119439	query_1	['GO:0006464', 'GO:0032268']
131	GO:BP	GO:0043412	macromolecule modification	5.45857e-15	TRUE	"The covalent alteration of one or more monomeric units in a polypeptide, polynucleotide, polysaccharide, or other biological macromolecule, resulting in a change in its properties." [GOC:go_curators]	3823	1346	369	21118	0.274146	0.0965211	query_1	['GO:0043170']
132	GO:BP	GO:0001568	blood vessel development	8.29397e-15	TRUE	"The process whose specific outcome is the progression of a blood vessel over time, from its formation to the mature structure. The blood vessel is the vasculature carrying blood." [GOC:hjd, UBERON:0001981]	743	1346	113	21118	0.0839525	0.152086	query_1	['GO:0001944', 'GO:0048856']
133	GO:BP	GO:0001649	osteoblast differentiation	1.7782e-14	TRUE	"The process whereby a relatively unspecialized cell acquires the specialized features of an osteoblast, a mesodermal or neural crest cell that gives rise to bone." [CL:0000062, GO_REF:0000034, GOC:jid]	208	1346	52	21118	0.038633	0.25	query_1	['GO:0001503', 'GO:0030154']
134	GO:BP	GO:0000902	cell morphogenesis	2.28356e-14	TRUE	"The developmental process in which the size or shape of a cell is generated and organized." [GOC:clt, GOC:dph, GOC:go_curators, GOC:tb]	1056	1346	142	21118	0.105498	0.13447	query_1	['GO:0009653']
135	GO:BP	GO:0009968	negative regulation of signal transduction	2.84827e-14	TRUE	"Any process that stops, prevents, or reduces the frequency, rate or extent of signal transduction." [GOC:sm]	1223	1346	157	21118	0.116642	0.128373	query_1	['GO:0007165', 'GO:0009966', 'GO:0010648', 'GO:0023057', 'GO:0048585']
136	GO:BP	GO:0008285	negative regulation of cell population proliferation	2.86096e-14	TRUE	"Any process that stops, prevents or reduces the rate or extent of cell proliferation." [GOC:go_curators]	715	1346	109	21118	0.0809807	0.152448	query_1	['GO:0008283', 'GO:0042127', 'GO:0048523']
137	GO:BP	GO:0010648	negative regulation of cell communication	3.16914e-14	TRUE	"Any process that decreases the frequency, rate or extent of cell communication. Cell communication is the process that mediates interactions between a cell and its surroundings. Encompasses interactions such as signaling or attachment between one cell and another cell, between a cell and an extracellular matrix, or between a cell and any other aspect of its environment." [GOC:dph, GOC:tb]	1359	1346	169	21118	0.125557	0.124356	query_1	['GO:0007154', 'GO:0010646', 'GO:0048523']
138	GO:BP	GO:0023057	negative regulation of signaling	3.93165e-14	TRUE	"Any process that stops, prevents, or reduces the frequency, rate or extent of a signaling process." [GOC:mtg_signal]	1362	1346	169	21118	0.125557	0.124082	query_1	['GO:0023051', 'GO:0023052', 'GO:0048519']
139	GO:BP	GO:0010033	response to organic substance	4.22255e-14	TRUE	"Any process that results in a change in state or activity of a cell or an organism (in terms of movement, secretion, enzyme production, gene expression, etc.) as a result of an organic substance stimulus." [GOC:sm, PMID:23356676]	3418	1346	335	21118	0.248886	0.0980105	query_1	['GO:0042221']
140	GO:BP	GO:0007167	enzyme linked receptor protein signaling pathway	5.06957e-14	TRUE	"Any series of molecular signals initiated by the binding of an extracellular ligand to a receptor on the surface of the target cell, where the receptor possesses catalytic activity or is closely associated with an enzyme such as a protein kinase, and ending with regulation of a downstream cellular process, e.g. transcription." [GOC:mah, GOC:signaling, ISBN:0815316194]	916	1346	128	21118	0.0950966	0.139738	query_1	['GO:0007166']
141	GO:BP	GO:0007267	cell-cell signaling	5.44131e-14	TRUE	"Any process that mediates the transfer of information from one cell to another. This process includes signal transduction in the receiving cell and, where applicable, release of a ligand and any processes that actively facilitate its transport and presentation to the receiving cell. Examples include signaling via soluble ligands, via cell adhesion molecules and via gap junctions." [GOC:dos, GOC:…	1504	1346	181	21118	0.134473	0.120346	query_1	['GO:0007154', 'GO:0023052']
142	GO:BP	GO:0043067	regulation of programmed cell death	6.11429e-14	TRUE	"Any process that modulates the frequency, rate or extent of programmed cell death, cell death resulting from activation of endogenous cellular processes." [GOC:jl]	1587	1346	188	21118	0.139673	0.118463	query_1	['GO:0010941', 'GO:0012501']
143	GO:BP	GO:0008219	cell death	1.09869e-13	TRUE	"Any biological process that results in permanent cessation of all vital functions of a cell. A cell should be considered dead when any one of the following molecular or morphological criteria is met: (1) the cell has lost the integrity of its plasma membrane; (2) the cell, including its nucleus, has undergone complete fragmentation into discrete bodies (frequently referred to as apoptotic bodies…	2136	1346	233	21118	0.173105	0.109082	query_1	['GO:0009987']
144	GO:BP	GO:0032879	regulation of localization	1.23172e-13	TRUE	"Any process that modulates the frequency, rate or extent of any process in which a cell, a substance, or a cellular entity is transported to, or maintained in, a specific location." [GOC:mah]	2868	1346	291	21118	0.216196	0.101464	query_1	['GO:0050789', 'GO:0051179']
145	GO:BP	GO:0001932	regulation of protein phosphorylation	1.43728e-13	TRUE	"Any process that modulates the frequency, rate or extent of addition of phosphate groups into an amino acid in a protein." [GOC:hjd]	1211	1346	154	21118	0.114413	0.127168	query_1	['GO:0006468', 'GO:0031399', 'GO:0042325']
146	GO:BP	GO:0051240	positive regulation of multicellular organismal process	1.59516e-13	TRUE	"Any process that activates or increases the frequency, rate or extent of an organismal process, any of the processes pertinent to the function of an organism above the cellular level; includes the integrated processes of tissues and organs." [GOC:ai]	1555	1346	184	21118	0.136701	0.118328	query_1	['GO:0032501', 'GO:0048518', 'GO:0051239']
147	GO:BP	GO:1901701	cellular response to oxygen-containing compound	1.7225e-13	TRUE	"Any process that results in a change in state or activity of a cell (in terms of movement, secretion, enzyme production, gene expression, etc.) as a result of an oxygen-containing compound stimulus." [GOC:pr, GOC:TermGenie]	1247	1346	157	21118	0.116642	0.125902	query_1	['GO:0070887', 'GO:1901700']
148	GO:BP	GO:0032268	regulation of cellular protein metabolic process	1.88855e-13	TRUE	"Any process that modulates the frequency, rate or extent of the chemical reactions and pathways involving a protein, occurring at the level of an individual cell." [GOC:mah]	2482	1346	260	21118	0.193165	0.104754	query_1	['GO:0031323', 'GO:0044267', 'GO:0051246']
149	GO:BP	GO:0030334	regulation of cell migration	2.44845e-13	TRUE	"Any process that modulates the frequency, rate or extent of cell migration." [GOC:go_curators]	934	1346	128	21118	0.0950966	0.137045	query_1	['GO:0016477', 'GO:2000145']
150	GO:BP	GO:0042981	regulation of apoptotic process	2.46326e-13	TRUE	"Any process that modulates the occurrence or rate of cell death by apoptotic process." [GOC:jl, GOC:mtg_apoptosis]	1550	1346	183	21118	0.135958	0.118065	query_1	['GO:0006915', 'GO:0043067']
151	GO:BP	GO:0051093	negative regulation of developmental process	4.39792e-13	TRUE	"Any process that stops, prevents or reduces the rate or extent of development, the biological process whose specific outcome is the progression of an organism over time from an initial condition (e.g. a zygote, or a young adult) to a later condition (e.g. a multicellular animal or an aged adult)." [GOC:ai]	1038	1346	137	21118	0.101783	0.131985	query_1	['GO:0032502', 'GO:0048519', 'GO:0050793']
152	GO:BP	GO:0035556	intracellular signal transduction	5.64649e-13	TRUE	"The process in which a signal is passed on to downstream components within the cell, which become activated themselves to further propagate the signal and finally trigger a change in the function or state of the cell." [GOC:bf, GOC:jl, GOC:signaling, ISBN:3527303782]	2491	1346	259	21118	0.192422	0.103974	query_1	['GO:0007165']
153	GO:BP	GO:0007417	central nervous system development	7.57386e-13	TRUE	"The process whose specific outcome is the progression of the central nervous system over time, from its formation to the mature structure. The central nervous system is the core nervous system that serves an integrating and coordinating function. In vertebrates it consists of the brain and spinal cord. In those invertebrates with a central nervous system it typically consists of a brain, cerebra…	1023	1346	135	21118	0.100297	0.131965	query_1	['GO:0007399', 'GO:0048731']
154	GO:BP	GO:0048514	blood vessel morphogenesis	7.62796e-13	TRUE	"The process in which the anatomical structures of blood vessels are generated and organized. The blood vessel is the vasculature carrying blood." [GOC:jid]	647	1346	99	21118	0.0735513	0.153014	query_1	['GO:0001568', 'GO:0035239']
155	GO:BP	GO:0051246	regulation of protein metabolic process	7.80304e-13	TRUE	"Any process that modulates the frequency, rate or extent of the chemical reactions and pathways involving a protein." [GOC:ai]	2650	1346	271	21118	0.201337	0.102264	query_1	['GO:0019538', 'GO:0051171', 'GO:0060255', 'GO:0080090']
156	GO:BP	GO:0022603	regulation of anatomical structure morphogenesis	1.13939e-12	TRUE	"Any process that modulates the frequency, rate or extent of anatomical structure morphogenesis." [GOC:mah]	963	1346	129	21118	0.0958395	0.133956	query_1	['GO:0009653', 'GO:0050793']
157	GO:BP	GO:2000145	regulation of cell motility	1.27467e-12	TRUE	"Any process that modulates the frequency, rate or extent of cell motility." [GOC:mah]	986	1346	131	21118	0.0973254	0.13286	query_1	['GO:0040012', 'GO:0048870', 'GO:0051270']
158	GO:BP	GO:0019220	regulation of phosphate metabolic process	1.51987e-12	TRUE	"Any process that modulates the frequency, rate or extent of the chemical reactions and pathways involving phosphates." [GOC:go_curators]	1555	1346	181	21118	0.134473	0.116399	query_1	['GO:0006796', 'GO:0051174']
159	GO:BP	GO:0042325	regulation of phosphorylation	1.53432e-12	TRUE	"Any process that modulates the frequency, rate or extent of addition of phosphate groups into a molecule." [GOC:jl]	1346	1346	163	21118	0.1211	0.1211	query_1	['GO:0016310', 'GO:0019220']
160	GO:BP	GO:0051174	regulation of phosphorus metabolic process	1.61865e-12	TRUE	"Any process that modulates the frequency, rate or extent of the chemical reactions and pathways involving phosphorus or compounds containing phosphorus." [GOC:ai]	1556	1346	181	21118	0.134473	0.116324	query_1	['GO:0006793', 'GO:0031323']
161	GO:BP	GO:0048858	cell projection morphogenesis	1.72333e-12	TRUE	"The process in which the anatomical structures of a cell projection are generated and organized." [GO_REF:0000021]	675	1346	101	21118	0.0750371	0.14963	query_1	['GO:0000902', 'GO:0030030', 'GO:0032990']
162	GO:BP	GO:1901700	response to oxygen-containing compound	1.79743e-12	TRUE	"Any process that results in a change in state or activity of a cell or an organism (in terms of movement, secretion, enzyme production, gene expression, etc.) as a result of an oxygen-containing compound stimulus." [GOC:pr, GOC:TermGenie]	1820	1346	203	21118	0.150817	0.111538	query_1	['GO:0042221']
163	GO:BP	GO:0006796	phosphate-containing compound metabolic process	1.81243e-12	TRUE	"The chemical reactions and pathways involving the phosphate group, the anion or salt of any phosphoric acid." [GOC:ai]	2809	1346	282	21118	0.20951	0.100392	query_1	['GO:0006793']
164	GO:BP	GO:0040012	regulation of locomotion	1.95982e-12	TRUE	"Any process that modulates the frequency, rate or extent of locomotion of a cell or organism." [GOC:ems]	1035	1346	135	21118	0.100297	0.130435	query_1	['GO:0040011', 'GO:0050789']
165	GO:BP	GO:0006915	apoptotic process	2.01298e-12	TRUE	"A programmed cell death process which begins when a cell receives an internal (e.g. DNA damage) or external signal (e.g. an extracellular death ligand), and proceeds through a series of biochemical events (signaling pathway phase) which trigger an execution phase. The execution phase is the last step of an apoptotic process, and is typically characterized by rounding-up of the cell, retraction o…	1919	1346	211	21118	0.156761	0.109953	query_1	['GO:0012501']
166	GO:BP	GO:0032501	multicellular organismal process	2.40757e-12	TRUE	"Any biological process, occurring at the level of a multicellular organism, pertinent to its function." [GOC:curators, GOC:dph, GOC:isa_complete, GOC:tb]	8483	1346	681	21118	0.505944	0.0802782	query_1	['GO:0008150']
167	GO:BP	GO:0060485	mesenchyme development	2.51399e-12	TRUE	"The process whose specific outcome is the progression of a mesenchymal tissue over time, from its formation to the mature structure. A mesenchymal tissue is made up of loosely packed stellate cells." [GOC:dph]	280	1346	58	21118	0.0430906	0.207143	query_1	['GO:0009888', 'GO:0048513']
168	GO:BP	GO:0001503	ossification	2.6141e-12	TRUE	"The formation of bone or of a bony substance, or the conversion of fibrous tissue or of cartilage into bone or a bony substance." [GOC:mtg_mpo, PMID:17572649]	392	1346	71	21118	0.0527489	0.181122	query_1	['GO:0032501']
169	GO:BP	GO:0120039	plasma membrane bounded cell projection morphogenesis	2.86301e-12	TRUE	"The process in which the anatomical structures of a plasma membrane bounded cell projection are generated and organized." [GOC:krc]	670	1346	100	21118	0.0742942	0.149254	query_1	['GO:0048858']
170	GO:BP	GO:0012501	programmed cell death	2.99254e-12	TRUE	"A process which begins when a cell receives an internal or external signal and activates a series of biochemical events (signaling pathway). The process ends with the death of the cell." [GOC:lr, GOC:mtg_apoptosis]	1975	1346	215	21118	0.159733	0.108861	query_1	['GO:0008219']
171	GO:BP	GO:0006468	protein phosphorylation	3.41716e-12	TRUE	"The process of introducing a phosphate group on to a protein." [GOC:hb]	1651	1346	188	21118	0.139673	0.11387	query_1	['GO:0006464', 'GO:0016310']
172	GO:BP	GO:0048762	mesenchymal cell differentiation	3.59797e-12	TRUE	"The process in which a relatively unspecialized cell acquires specialized features of a mesenchymal cell. A mesenchymal cell is a loosely associated cell that is part of the connective tissue in an organism. Mesenchymal cells give rise to more mature connective tissue cell types." [GOC:dph, GOC:jid]	226	1346	51	21118	0.03789	0.225664	query_1	['GO:0030154', 'GO:0060485']
173	GO:BP	GO:0051128	regulation of cellular component organization	3.77188e-12	TRUE	"Any process that modulates the frequency, rate or extent of a process involved in the formation, arrangement of constituent parts, or disassembly of cell structures, including the plasma membrane and any external encapsulating structures such as the cell wall and cell envelope." [GOC:ai]	2428	1346	251	21118	0.186478	0.103377	query_1	['GO:0016043', 'GO:0050794']
174	GO:BP	GO:0006793	phosphorus metabolic process	5.2162e-12	TRUE	"The chemical reactions and pathways involving the nonmetallic element phosphorus or compounds that contain phosphorus, usually in the form of a phosphate group (PO4)." [GOC:ai]	2832	1346	282	21118	0.20951	0.0995763	query_1	['GO:0044237']
175	GO:BP	GO:0009790	embryo development	5.50216e-12	TRUE	"The process whose specific outcome is the progression of an embryo from its formation until the end of its embryonic life stage. The end of the embryonic stage is organism-specific. For example, for mammals, the process would begin with zygote formation and end with birth. For insects, the process would begin at zygote formation and end with larval hatching. For plant zygotic embryos, this would…	1171	1346	146	21118	0.10847	0.12468	query_1	['GO:0007275']
176	GO:BP	GO:0016310	phosphorylation	5.78065e-12	TRUE	"The process of introducing a phosphate group into a molecule, usually with the formation of a phosphoric ester, a phosphoric anhydride or a phosphoric amide." [ISBN:0198506732]	1938	1346	211	21118	0.156761	0.108875	query_1	['GO:0006796']
177	GO:BP	GO:0071495	cellular response to endogenous stimulus	6.53676e-12	TRUE	"Any process that results in a change in state or activity of a cell (in terms of movement, secretion, enzyme production, gene expression, etc.) as a result of a stimulus arising within the organism." [GOC:mah]	1333	1346	160	21118	0.118871	0.12003	query_1	['GO:0009719']
178	GO:BP	GO:0051270	regulation of cellular component movement	7.18105e-12	TRUE	"Any process that modulates the frequency, rate or extent of the movement of a cellular component." [GOC:ai, GOC:dph, GOC:jl]	1074	1346	137	21118	0.101783	0.127561	query_1	['GO:0006928', 'GO:0032879', 'GO:0050794']
179	GO:BP	GO:0065008	regulation of biological quality	7.40082e-12	TRUE	"Any process that modulates a qualitative or quantitative trait of a biological quality. A biological quality is a measurable attribute of an organism or part of an organism, such as size, mass, shape, color, etc." [GOC:dph, GOC:isa_complete, GOC:mah, GOC:pr, GOC:vw]	3876	1346	360	21118	0.267459	0.0928793	query_1	['GO:0065007']
180	GO:BP	GO:0032989	cellular component morphogenesis	7.85345e-12	TRUE	"The process in which cellular structures, including whole cells or cell parts, are generated and organized." [GOC:dph, GOC:mah, GOC:tb]	794	1346	111	21118	0.0824666	0.139798	query_1	['GO:0009653', 'GO:0016043', 'GO:0048869']
181	GO:BP	GO:0060322	head development	8.20065e-12	TRUE	"The biological process whose specific outcome is the progression of a head from an initial condition to its mature state. The head is the anterior-most division of the body." [GOC:dph]	805	1346	112	21118	0.0832095	0.13913	query_1	['GO:0048856']
182	GO:BP	GO:0032990	cell part morphogenesis	1.07659e-11	TRUE	"The process in which the anatomical structures of a cell part are generated and organized." [GOC:mah]	704	1346	102	21118	0.0757801	0.144886	query_1	['GO:0032989']
183	GO:BP	GO:1905114	cell surface receptor signaling pathway involved in cell-cell signaling	1.42448e-11	TRUE	"Any cell surface receptor signaling pathway that is involved in cell-cell signaling." [GO_REF:0000060, GOC:TermGenie, ISBN:0-7167-3051-0]	527	1346	84	21118	0.0624071	0.159393	query_1	['GO:0007166', 'GO:0007267']
184	GO:BP	GO:0048812	neuron projection morphogenesis	1.43856e-11	TRUE	"The process in which the anatomical structures of a neuron projection are generated and organized. A neuron projection is any process extending from a neural cell, such as axons or dendrites." [GOC:mah]	656	1346	97	21118	0.0720654	0.147866	query_1	['GO:0031175', 'GO:0120039']
185	GO:BP	GO:0023056	positive regulation of signaling	2.35376e-11	TRUE	"Any process that activates, maintains or increases the frequency, rate or extent of a signaling process." [GOC:mtg_signal]	1732	1346	192	21118	0.142645	0.110855	query_1	['GO:0023051', 'GO:0023052', 'GO:0048518']
186	GO:BP	GO:0065009	regulation of molecular function	3.08756e-11	TRUE	"Any process that modulates the frequency, rate or extent of a molecular function, an elemental biological activity occurring at the molecular level, such as catalysis or binding." [GOC:isa_complete]	3029	1346	294	21118	0.218425	0.0970617	query_1	['GO:0065007']
187	GO:BP	GO:0007420	brain development	3.38024e-11	TRUE	"The process whose specific outcome is the progression of the brain over time, from its formation to the mature structure. Brain development begins with patterning events in the neural tube and ends with the mature structure that is the center of thought and emotion. The brain is responsible for the coordination and control of bodily activities and the interpretation of information from the sense…	758	1346	106	21118	0.0787519	0.139842	query_1	['GO:0007417', 'GO:0048513', 'GO:0060322']
188	GO:BP	GO:0001837	epithelial to mesenchymal transition	3.7605e-11	TRUE	"A transition where an epithelial cell loses apical/basolateral polarity, severs intercellular adhesive junctions, degrades basement membrane components and becomes a migratory mesenchymal cell." [GOC:dph, PMID:14701881]	148	1346	39	21118	0.0289747	0.263514	query_1	['GO:0048762']
189	GO:BP	GO:0001501	skeletal system development	4.35286e-11	TRUE	"The process whose specific outcome is the progression of the skeleton over time, from its formation to the mature structure. The skeleton is the bony framework of the body in vertebrates (endoskeleton) or the hard outer envelope of insects (exoskeleton or dermoskeleton)." [GOC:dph, GOC:jid, GOC:tb]	508	1346	81	21118	0.0601783	0.159449	query_1	['GO:0048731']
190	GO:BP	GO:0010647	positive regulation of cell communication	6.20897e-11	TRUE	"Any process that increases the frequency, rate or extent of cell communication. Cell communication is the process that mediates interactions between a cell and its surroundings. Encompasses interactions such as signaling or attachment between one cell and another cell, between a cell and an extracellular matrix, or between a cell and any other aspect of its environment." [GOC:dph, GOC:tb]	1725	1346	190	21118	0.141159	0.110145	query_1	['GO:0007154', 'GO:0010646', 'GO:0048522']
191	GO:BP	GO:0016055	Wnt signaling pathway	9.08608e-11	TRUE	"The series of molecular signals initiated by binding of a Wnt protein to a frizzled family receptor on the surface of the target cell and ending with a change in cell state." [GOC:dph, GOC:go_curators, PMID:11532397]	410	1346	70	21118	0.0520059	0.170732	query_1	['GO:0198738', 'GO:1905114']
192	GO:BP	GO:0007423	sensory organ development	9.14077e-11	TRUE	"The process whose specific outcome is the progression of sensory organs over time, from its formation to the mature structure." [GOC:go_curators]	604	1346	90	21118	0.0668648	0.149007	query_1	['GO:0048513']
193	GO:BP	GO:0032270	positive regulation of cellular protein metabolic process	1.14156e-10	TRUE	"Any process that activates or increases the frequency, rate or extent of the chemical reactions and pathways involving a protein, occurring at the level of an individual cell." [GOC:mah]	1448	1346	166	21118	0.123328	0.114641	query_1	['GO:0031325', 'GO:0032268', 'GO:0044267', 'GO:0051247']
194	GO:BP	GO:0198738	cell-cell signaling by wnt	1.16483e-10	TRUE	"Any process that mediates the transfer of information from one cell to another, medaited by a wnt family protein ligand. This process includes wnt signal transduction in the receiving cell, release of wnt ligand from a secreting cell as well as any processes that actively facilitate wnt transport and presentation to receptor on the recieving cell." [GOC:dos]	412	1346	70	21118	0.0520059	0.169903	query_1	['GO:0007267']
195	GO:BP	GO:0000904	cell morphogenesis involved in differentiation	1.20497e-10	TRUE	"The change in form (cell shape and size) that occurs when relatively unspecialized cells, e.g. embryonic or regenerative cells, acquire specialized structural and/or functional features that characterize the cells, tissues, or organs of the mature organism or some other relatively stable phase of the organism's life history." [GOC:go_curators]	762	1346	105	21118	0.0780089	0.137795	query_1	['GO:0000902', 'GO:0048468']
196	GO:BP	GO:0048585	negative regulation of response to stimulus	1.20931e-10	TRUE	"Any process that stops, prevents, or reduces the frequency, rate or extent of a response to a stimulus. Response to stimulus is a change in state or activity of a cell or an organism (in terms of movement, secretion, enzyme production, gene expression, etc.) as a result of a stimulus." [GOC:jid]	1616	1346	180	21118	0.13373	0.111386	query_1	['GO:0048519', 'GO:0048583', 'GO:0050896']
197	GO:BP	GO:0002520	immune system development	1.51356e-10	TRUE	"The process whose specific outcome is the progression of an organismal system whose objective is to provide calibrated responses by an organism to a potential internal or invasive threat, over time, from its formation to the mature structure. A system is a regularly interacting or interdependent group of organs or tissues that work together to carry out a given biological process." [GOC:add, GOC…	1015	1346	128	21118	0.0950966	0.126108	query_1	['GO:0002376', 'GO:0048731']
198	GO:BP	GO:0120036	plasma membrane bounded cell projection organization	1.51853e-10	TRUE	"A process that is carried out at the cellular level which results in the assembly, arrangement of constituent parts, or disassembly of a plasma membrane bounded prolongation or process extending from a cell, e.g. a cilium or axon." [GOC:krc]	1536	1346	173	21118	0.128529	0.11263	query_1	['GO:0030030']
199	GO:BP	GO:0051247	positive regulation of protein metabolic process	2.0273e-10	TRUE	"Any process that activates or increases the frequency, rate or extent of the chemical reactions and pathways involving a protein." [GOC:ai]	1529	1346	172	21118	0.127786	0.112492	query_1	['GO:0010604', 'GO:0019538', 'GO:0051173', 'GO:0051246']
200	GO:BP	GO:0009967	positive regulation of signal transduction	2.13478e-10	TRUE	"Any process that activates or increases the frequency, rate or extent of signal transduction." [GOC:sm]	1506	1346	170	21118	0.1263	0.112882	query_1	['GO:0007165', 'GO:0009966', 'GO:0010647', 'GO:0023056', 'GO:0048584']
201	GO:BP	GO:0033993	response to lipid	3.0512e-10	TRUE	"Any process that results in a change in state or activity of a cell or an organism (in terms of movement, secretion, enzyme production, gene expression, etc.) as a result of a lipid stimulus." [GOC:sl]	980	1346	124	21118	0.0921248	0.126531	query_1	['GO:0010033']
202	GO:BP	GO:0030030	cell projection organization	3.81447e-10	TRUE	"A process that is carried out at the cellular level which results in the assembly, arrangement of constituent parts, or disassembly of a prolongation or process extending from a cell, e.g. a flagellum or axon." [GOC:jl, GOC:mah, http://www.cogsci.princeton.edu/~wn/]	1576	1346	175	21118	0.130015	0.111041	query_1	['GO:0016043']
203	GO:BP	GO:0001763	morphogenesis of a branching structure	4.11666e-10	TRUE	"The process in which the anatomical structures of branches are generated and organized. A branch is a division or offshoot from a main stem. Examples in animals would include blood vessels, nerves, lymphatics and other endothelial or epithelial tubes." [ISBN:0721662544]	220	1346	47	21118	0.0349183	0.213636	query_1	['GO:0009653', 'GO:0032501']
204	GO:BP	GO:0048729	tissue morphogenesis	6.50361e-10	TRUE	"The process in which the anatomical structures of a tissue are generated and organized." [GOC:dph, GOC:jid]	645	1346	92	21118	0.0683507	0.142636	query_1	['GO:0009653', 'GO:0009888']
205	GO:BP	GO:1902531	regulation of intracellular signal transduction	7.91118e-10	TRUE	"Any process that modulates the frequency, rate or extent of intracellular signal transduction." [GOC:dph, GOC:signaling, GOC:tb, GOC:TermGenie]	1589	1346	175	21118	0.130015	0.110132	query_1	['GO:0009966', 'GO:0035556']
206	GO:BP	GO:0048534	hematopoietic or lymphoid organ development	1.10143e-09	TRUE	"The process whose specific outcome is the progression of any organ involved in hematopoiesis (also known as hemopoiesis) or lymphoid cell activation over time, from its formation to the mature structure. Such development includes differentiation of resident cell types (stromal cells) and of migratory cell types dependent on the unique microenvironment afforded by the organ for their proper diffe…	953	1346	120	21118	0.089153	0.125918	query_1	['GO:0002520', 'GO:0048513']
207	GO:BP	GO:0061564	axon development	1.10772e-09	TRUE	"The progression of an axon over time. Covers axonogenesis (de novo generation of an axon) and axon regeneration (regrowth), as well as processes pertaining to the progression of the axon over time (fasciculation and defasciculation)." [GOC:dph, GOC:pg, GOC:pr]	489	1346	76	21118	0.0564636	0.155419	query_1	['GO:0031175']
208	GO:BP	GO:0072001	renal system development	1.12621e-09	TRUE	"The process whose specific outcome is the progression of the renal system over time, from its formation to the mature structure. The renal system maintains fluid balance and contributes to electrolyte balance, acid/base balance, and disposal of nitrogenous waste products. In humans, the renal system comprises a pair of kidneys, a pair of ureters, urinary bladder, urethra, sphincter muscle and as…	338	1346	60	21118	0.0445765	0.177515	query_1	['GO:0001655', 'GO:0048731']
209	GO:BP	GO:0072073	kidney epithelium development	1.30917e-09	TRUE	"The process whose specific outcome is the progression of an epithelium in the kidney over time, from its formation to the mature structure. An epithelium is a tissue that covers the internal or external surfaces of an anatomical structure." [GOC:mtg_kidney_jan10]	149	1346	37	21118	0.0274889	0.248322	query_1	['GO:0001822', 'GO:0060429']
210	GO:BP	GO:0044267	cellular protein metabolic process	1.49262e-09	TRUE	"The chemical reactions and pathways involving a specific protein, rather than of proteins in general, occurring at the level of an individual cell. Includes cellular protein modification." [GOC:jl]	4815	1346	417	21118	0.309807	0.0866044	query_1	['GO:0019538', 'GO:0044260']
211	GO:BP	GO:0048667	cell morphogenesis involved in neuron differentiation	1.5702e-09	TRUE	"The process in which the structures of a neuron are generated and organized. This process occurs while the initially relatively unspecialized cell is acquiring the specialized features of a neuron." [GOC:dph, GOC:tb]	603	1346	87	21118	0.064636	0.144279	query_1	['GO:0000904', 'GO:0048666']
212	GO:BP	GO:0031401	positive regulation of protein modification process	1.59379e-09	TRUE	"Any process that activates or increases the frequency, rate or extent of the covalent alteration of one or more amino acid residues within a protein." [GOC:mah, GOC:tb]	1071	1346	130	21118	0.0965825	0.121382	query_1	['GO:0006464', 'GO:0031399', 'GO:0032270']
213	GO:BP	GO:0060548	negative regulation of cell death	1.85062e-09	TRUE	"Any process that decreases the rate or frequency of cell death. Cell death is the specific activation or halting of processes within a cell so that its vital functions markedly cease, rather than simply deteriorating gradually over time, which culminates in cell death." [GOC:BHF, GOC:dph, GOC:tb]	1119	1346	134	21118	0.0995542	0.11975	query_1	['GO:0008219', 'GO:0010941', 'GO:0048523']
214	GO:BP	GO:0001667	ameboidal-type cell migration	1.97731e-09	TRUE	"Cell migration that is accomplished by extension and retraction of a pseudopodium." [GOC:dph]	436	1346	70	21118	0.0520059	0.16055	query_1	['GO:0016477']
215	GO:BP	GO:0002009	morphogenesis of an epithelium	2.33696e-09	TRUE	"The process in which the anatomical structures of epithelia are generated and organized. An epithelium consists of closely packed cells arranged in one or more layers, that covers the outer surfaces of the body or lines any internal cavity or tube." [GOC:dph, GOC:jl, GOC:tb, ISBN:0198506732]	536	1346	80	21118	0.0594354	0.149254	query_1	['GO:0048729', 'GO:0060429']
216	GO:BP	GO:0060070	canonical Wnt signaling pathway	2.38864e-09	TRUE	"The series of molecular signals initiated by binding of a Wnt protein to a frizzled family receptor on the surface of the target cell, followed by propagation of the signal via beta-catenin, and ending with a change in transcription of target genes. In this pathway, the activated receptor signals via downstream effectors that result in the inhibition of beta-catenin phosphorylation, thereby prev…	290	1346	54	21118	0.0401189	0.186207	query_1	['GO:0016055']
217	GO:BP	GO:0045667	regulation of osteoblast differentiation	2.87073e-09	TRUE	"Any process that modulates the frequency, rate or extent of osteoblast differentiation." [GOC:go_curators]	138	1346	35	21118	0.026003	0.253623	query_1	['GO:0001649', 'GO:0045595']
218	GO:BP	GO:0001822	kidney development	2.88162e-09	TRUE	"The process whose specific outcome is the progression of the kidney over time, from its formation to the mature structure. The kidney is an organ that filters the blood and/or excretes the end products of body metabolism in the form of urine." [GOC:dph, GOC:mtg_kidney_jan10, ISBN:0124020607, ISBN:0721662544]	327	1346	58	21118	0.0430906	0.17737	query_1	['GO:0048513', 'GO:0072001']
219	GO:BP	GO:0009792	embryo development ending in birth or egg hatching	3.4167e-09	TRUE	"The process whose specific outcome is the progression of an embryo over time, from zygote formation until the end of the embryonic life stage. The end of the embryonic life stage is organism-specific and may be somewhat arbitrary; for mammals it is usually considered to be birth, for insects the hatching of the first instar larva from the eggshell." [GOC:go_curators, GOC:isa_complete, GOC:mtg_se…	781	1346	103	21118	0.076523	0.131882	query_1	['GO:0009790']
220	GO:BP	GO:0070848	response to growth factor	3.96526e-09	TRUE	"Any process that results in a change in state or activity of a cell or an organism (in terms of movement, secretion, enzyme production, gene expression, etc.) as a result of a growth factor stimulus." [GOC:BHF, GOC:mah]	697	1346	95	21118	0.0705795	0.136298	query_1	['GO:0010033']
221	GO:BP	GO:0048598	embryonic morphogenesis	4.01997e-09	TRUE	"The process in which anatomical structures are generated and organized during the embryonic phase. The embryonic phase begins with zygote formation. The end of the embryonic phase is organism-specific. For example, it would be at birth for mammals, larval hatching for insects and seed dormancy in plants." [GOC:jid, GOC:mtg_sensu]	634	1346	89	21118	0.0661218	0.140379	query_1	['GO:0009653', 'GO:0009790']
222	GO:BP	GO:0030900	forebrain development	4.45924e-09	TRUE	"The process whose specific outcome is the progression of the forebrain over time, from its formation to the mature structure. The forebrain is the anterior of the three primary divisions of the developing chordate brain or the corresponding part of the adult brain (in vertebrates, includes especially the cerebral hemispheres, the thalamus, and the hypothalamus and especially in higher vertebrate…	424	1346	68	21118	0.0505201	0.160377	query_1	['GO:0007420', 'GO:0048856']
223	GO:BP	GO:0001525	angiogenesis	5.63614e-09	TRUE	"Blood vessel formation when new vessels emerge from the proliferation of pre-existing blood vessels." [ISBN:0878932453]	545	1346	80	21118	0.0594354	0.146789	query_1	['GO:0048514', 'GO:0048646']
224	GO:BP	GO:0061138	morphogenesis of a branching epithelium	6.05031e-09	TRUE	"The process in which the anatomical structures of a branched epithelium are generated and organized." [GOC:dph]	203	1346	43	21118	0.0319465	0.211823	query_1	['GO:0001763', 'GO:0002009']
225	GO:BP	GO:0010717	regulation of epithelial to mesenchymal transition	7.6984e-09	TRUE	"Any process that modulates the rate, frequency, or extent of epithelial to mesenchymal transition. Epithelial to mesenchymal transition where an epithelial cell loses apical/basolateral polarity, severs intercellular adhesive junctions, degrades basement membrane components and becomes a migratory mesenchymal cell." [GOC:BHF, GOC:dph, GOC:tb]	94	1346	28	21118	0.0208024	0.297872	query_1	['GO:0001837', 'GO:0045595']
226	GO:BP	GO:0001655	urogenital system development	8.57382e-09	TRUE	"The process whose specific outcome is the progression of the urogenital system over time, from its formation to the mature structure." [GOC:go_curators]	382	1346	63	21118	0.0468053	0.164921	query_1	['GO:0048731']
227	GO:BP	GO:0061061	muscle structure development	9.22756e-09	TRUE	"The progression of a muscle structure over time, from its formation to its mature state. Muscle structures are contractile cells, tissues or organs that are found in multicellular organisms." [GOC:dph]	654	1346	90	21118	0.0668648	0.137615	query_1	['GO:0048856']
228	GO:BP	GO:0031400	negative regulation of protein modification process	9.53488e-09	TRUE	"Any process that stops, prevents, or reduces the frequency, rate or extent of the covalent alteration of one or more amino acid residues within a protein." [GOC:mah, GOC:tb]	571	1346	82	21118	0.0609212	0.143608	query_1	['GO:0006464', 'GO:0031399', 'GO:0032269']
229	GO:BP	GO:0061448	connective tissue development	1.0466e-08	TRUE	"The progression of a connective tissue over time, from its formation to the mature structure." [GOC:BHF]	274	1346	51	21118	0.03789	0.186131	query_1	['GO:0009888']
230	GO:BP	GO:0006325	chromatin organization	1.0939e-08	TRUE	"Any process that results in the specification, formation or maintenance of the physical structure of eukaryotic chromatin." [GOC:mah, GOC:vw, PMID:20404130]	785	1346	102	21118	0.0757801	0.129936	query_1	['GO:0016043', 'GO:0051276']
231	GO:BP	GO:0043009	chordate embryonic development	1.25801e-08	TRUE	"The process whose specific outcome is the progression of the embryo over time, from zygote formation through a stage including a notochord and neural tube until birth or egg hatching." [GOC:mtg_sensu]	765	1346	100	21118	0.0742942	0.130719	query_1	['GO:0009792']
232	GO:BP	GO:0030097	hemopoiesis	1.28822e-08	TRUE	"The process whose specific outcome is the progression of the myeloid and lymphoid derived organ/tissue systems of the blood and other parts of the body over time, from formation to the mature structure. The site of hemopoiesis is variable during development, but occurs primarily in bone marrow or kidney in many adult vertebrates." [GOC:dgh, ISBN:0198506732]	909	1346	113	21118	0.0839525	0.124312	query_1	['GO:0048534']
233	GO:BP	GO:0071363	cellular response to growth factor stimulus	1.34188e-08	TRUE	"Any process that results in a change in state or activity of a cell (in terms of movement, secretion, enzyme production, gene expression, etc.) as a result of a growth factor stimulus." [GOC:mah]	669	1346	91	21118	0.0676077	0.136024	query_1	['GO:0070848', 'GO:0071310']
234	GO:BP	GO:0045596	negative regulation of cell differentiation	1.46968e-08	TRUE	"Any process that stops, prevents, or reduces the frequency, rate or extent of cell differentiation." [GOC:go_curators]	767	1346	100	21118	0.0742942	0.130378	query_1	['GO:0030154', 'GO:0045595', 'GO:0048523', 'GO:0051093']
235	GO:BP	GO:0051241	negative regulation of multicellular organismal process	1.59112e-08	TRUE	"Any process that stops, prevents, or reduces the frequency, rate or extent of an organismal process, the processes pertinent to the function of an organism above the cellular level; includes the integrated processes of tissues and organs." [GOC:ai]	1083	1346	128	21118	0.0950966	0.11819	query_1	['GO:0032501', 'GO:0048519', 'GO:0051239']
236	GO:BP	GO:0007169	transmembrane receptor protein tyrosine kinase signaling pathway	1.60058e-08	TRUE	"A series of molecular signals initiated by the binding of an extracellular ligand to a receptor on the surface of the target cell where the receptor possesses tyrosine kinase activity, and ending with regulation of a downstream cellular process, e.g. transcription." [GOC:ceb, GOC:signaling]	587	1346	83	21118	0.0616642	0.141397	query_1	['GO:0007167']
237	GO:BP	GO:0048754	branching morphogenesis of an epithelial tube	1.70878e-08	TRUE	"The process in which the anatomical structures of branches in an epithelial tube are generated and organized. A tube is a long hollow cylinder." [GOC:dgh, GOC:dph, GOC:jid]	169	1346	38	21118	0.0282318	0.224852	query_1	['GO:0035239', 'GO:0060562', 'GO:0061138']
238	GO:BP	GO:0009987	cellular process	1.83225e-08	TRUE	"Any process that is carried out at the cellular level, but not necessarily restricted to a single cell. For example, cell communication occurs among more than one cell, but occurs at the cellular level." [GOC:go_curators, GOC:isa_complete]	17828	1346	1219	21118	0.905646	0.0683756	query_1	['GO:0008150']
239	GO:BP	GO:0018193	peptidyl-amino acid modification	2.19946e-08	TRUE	"The alteration of an amino acid residue in a peptide." [GOC:mah]	1264	1346	143	21118	0.106241	0.113133	query_1	['GO:0006464']
240	GO:BP	GO:0097190	apoptotic signaling pathway	2.28997e-08	TRUE	"A series of molecular signals which triggers the apoptotic death of a cell. The pathway starts with reception of a signal, and ends when the execution phase of apoptosis is triggered." [GOC:mtg_apoptosis]	591	1346	83	21118	0.0616642	0.14044	query_1	['GO:0006915', 'GO:0007165']
241	GO:BP	GO:0001823	mesonephros development	2.55263e-08	TRUE	"The process whose specific outcome is the progression of the mesonephros over time, from its formation to the mature structure. In mammals, the mesonephros is the second of the three embryonic kidneys to be established and exists only transiently. In lower vertebrates such as fish and amphibia, the mesonephros will form the mature kidney." [GOC:dph, ISBN:0124020607, ISBN:0721662544, PMID:1053531…	105	1346	29	21118	0.0215453	0.27619	query_1	['GO:0001822']
242	GO:BP	GO:0071407	cellular response to organic cyclic compound	3.26177e-08	TRUE	"Any process that results in a change in state or activity of a cell (in terms of movement, secretion, enzyme production, gene expression, etc.) as a result of an organic cyclic compound stimulus." [GOC:mah]	595	1346	83	21118	0.0616642	0.139496	query_1	['GO:0014070', 'GO:0071310']
243	GO:BP	GO:0048880	sensory system development	3.93105e-08	TRUE	"The process whose specific outcome is the progression of a sensory system over time from its formation to the mature structure." [GOC:dgh]	405	1346	64	21118	0.0475483	0.158025	query_1	['GO:0048731']
244	GO:BP	GO:0001657	ureteric bud development	4.04788e-08	TRUE	"The process whose specific outcome is the progression of the ureteric bud over time, from its formation to the mature structure." [GOC:go_curators]	100	1346	28	21118	0.0208024	0.28	query_1	['GO:0072164']
245	GO:BP	GO:0060562	epithelial tube morphogenesis	4.34753e-08	TRUE	"The process in which the anatomical structures of a tube are generated and organized from an epithelium. Epithelial tubes transport gases, liquids and cells from one site to another and form the basic structure of many organs and tissues, with tube shape and organization varying from the single-celled excretory organ in Caenorhabditis elegans to the branching trees of the mammalian kidney and in…	358	1346	59	21118	0.0438336	0.164804	query_1	['GO:0002009', 'GO:0035239']
246	GO:BP	GO:0014070	response to organic cyclic compound	4.95146e-08	TRUE	"Any process that results in a change in state or activity of a cell or an organism (in terms of movement, secretion, enzyme production, gene expression, etc.) as a result of an organic cyclic compound stimulus." [GOC:ef]	1043	1346	123	21118	0.0913819	0.117929	query_1	['GO:0010033']
247	GO:BP	GO:0019538	protein metabolic process	5.16045e-08	TRUE	"The chemical reactions and pathways involving a protein. Includes protein modification." [GOC:ma]	5474	1346	455	21118	0.338039	0.0831202	query_1	['GO:0043170', 'GO:0044238', 'GO:1901564']
248	GO:BP	GO:0072164	mesonephric tubule development	5.26364e-08	TRUE	"The progression of a mesonephric tubule over time, from its initial formation to the mature structure. A mesonephric tubule is an epithelial tube that is part of the mesonephros." [GOC:mtg_kidney_jan10]	101	1346	28	21118	0.0208024	0.277228	query_1	['GO:0035295', 'GO:0072163']
249	GO:BP	GO:0072163	mesonephric epithelium development	5.26364e-08	TRUE	"The process whose specific outcome is the progression of an epithelium in the mesonephros over time, from its formation to the mature structure. An epithelium is a tissue that covers the internal or external surfaces of an anatomical structure." [GOC:mtg_kidney_jan10]	101	1346	28	21118	0.0208024	0.277228	query_1	['GO:0001823', 'GO:0072073']
250	GO:BP	GO:0001934	positive regulation of protein phosphorylation	6.01942e-08	TRUE	"Any process that activates or increases the frequency, rate or extent of addition of phosphate groups to amino acids within a protein." [GOC:hjd]	830	1346	104	21118	0.077266	0.125301	query_1	['GO:0001932', 'GO:0006468', 'GO:0031401', 'GO:0042327']
251	GO:BP	GO:1901564	organonitrogen compound metabolic process	6.23893e-08	TRUE	"The chemical reactions and pathways involving organonitrogen compound." [GOC:pr, GOC:TermGenie]	6326	1346	513	21118	0.381129	0.0810939	query_1	['GO:0006807', 'GO:0071704']
252	GO:BP	GO:0040008	regulation of growth	6.75316e-08	TRUE	"Any process that modulates the frequency, rate or extent of the growth of all or part of an organism so that it occurs at its proper speed, either globally or in a specific part of the organism's development." [GOC:ems, GOC:mah]	678	1346	90	21118	0.0668648	0.132743	query_1	['GO:0040007', 'GO:0050789']
253	GO:BP	GO:0007507	heart development	8.73601e-08	TRUE	"The process whose specific outcome is the progression of the heart over time, from its formation to the mature structure. The heart is a hollow, muscular organ, which, by contracting rhythmically, keeps up the circulation of the blood." [GOC:jid, UBERON:0000948]	617	1346	84	21118	0.0624071	0.136143	query_1	['GO:0048513', 'GO:0072359']
254	GO:BP	GO:0043068	positive regulation of programmed cell death	9.18396e-08	TRUE	"Any process that activates or increases the frequency, rate or extent of programmed cell death, cell death resulting from activation of endogenous cellular processes." [GOC:jl]	607	1346	83	21118	0.0616642	0.136738	query_1	['GO:0010942', 'GO:0012501', 'GO:0043067']
255	GO:BP	GO:0044057	regulation of system process	9.7934e-08	TRUE	"Any process that modulates the frequency, rate or extent of a system process, a multicellular organismal process carried out by any of the organs or tissues in an organ system." [GOC:jl]	629	1346	85	21118	0.0631501	0.135135	query_1	['GO:0003008', 'GO:0051239']
256	GO:BP	GO:0007409	axonogenesis	1.17945e-07	TRUE	"De novo generation of a long process of a neuron, including the terminal branched region. Refers to the morphogenesis or creation of shape or form of the developing axon, which carries efferent (outgoing) action potentials from the cell body towards target cells." [GOC:dph, GOC:jid, GOC:pg, GOC:pr, ISBN:0198506732]	445	1346	67	21118	0.0497771	0.150562	query_1	['GO:0048667', 'GO:0048812', 'GO:0061564']
257	GO:BP	GO:0035107	appendage morphogenesis	1.23697e-07	TRUE	"The process in which the anatomical structures of appendages are generated and organized. An appendage is an organ or part that is attached to the trunk of an organism, such as a limb or a branch." [ISBN:0582227089]	156	1346	35	21118	0.026003	0.224359	query_1	['GO:0009653', 'GO:0048736']
258	GO:BP	GO:0035108	limb morphogenesis	1.23697e-07	TRUE	"The process in which the anatomical structures of a limb are generated and organized. A limb is a paired appendage of a tetrapod used for locomotion or grasping." [UBERON:0002101]	156	1346	35	21118	0.026003	0.224359	query_1	['GO:0035107', 'GO:0060173']
259	GO:BP	GO:0051130	positive regulation of cellular component organization	1.32581e-07	TRUE	"Any process that activates or increases the frequency, rate or extent of a process involved in the formation, arrangement of constituent parts, or disassembly of cell structures, including the plasma membrane and any external encapsulating structures such as the cell wall and cell envelope." [GOC:ai]	1200	1346	135	21118	0.100297	0.1125	query_1	['GO:0016043', 'GO:0048522', 'GO:0051128']
260	GO:BP	GO:0010942	positive regulation of cell death	1.35878e-07	TRUE	"Any process that increases the rate or frequency of cell death. Cell death is the specific activation or halting of processes within a cell so that its vital functions markedly cease, rather than simply deteriorating gradually over time, which culminates in cell death." [GOC:dph, GOC:tb]	676	1346	89	21118	0.0661218	0.131657	query_1	['GO:0008219', 'GO:0010941', 'GO:0048522']
261	GO:BP	GO:0001654	eye development	1.36037e-07	TRUE	"The process whose specific outcome is the progression of the eye over time, from its formation to the mature structure. The eye is the organ of sight." [GOC:jid, GOC:jl]	397	1346	62	21118	0.0460624	0.156171	query_1	['GO:0007423', 'GO:0150063']
262	GO:BP	GO:0043065	positive regulation of apoptotic process	1.42051e-07	TRUE	"Any process that activates or increases the frequency, rate or extent of cell death by apoptotic process." [GOC:jl, GOC:mtg_apoptosis]	591	1346	81	21118	0.0601783	0.137056	query_1	['GO:0006915', 'GO:0042981', 'GO:0043068']
263	GO:BP	GO:0016570	histone modification	1.4264e-07	TRUE	"The covalent alteration of one or more amino acid residues within a histone protein." [GOC:krc]	467	1346	69	21118	0.051263	0.147752	query_1	['GO:0006464', 'GO:0016569']
264	GO:BP	GO:0048863	stem cell differentiation	1.45883e-07	TRUE	"The process in which a relatively unspecialized cell acquires specialized features of a stem cell. A stem cell is a cell that retains the ability to divide and proliferate throughout life to provide progenitor cells that can differentiate into specialized cells." [CL:0000034, GOC:isa_complete]	214	1346	42	21118	0.0312036	0.196262	query_1	['GO:0030154']
265	GO:BP	GO:0044093	positive regulation of molecular function	1.49919e-07	TRUE	"Any process that activates or increases the rate or extent of a molecular function, an elemental biological activity occurring at the molecular level, such as catalysis or binding." [GO:jl]	1678	1346	174	21118	0.129272	0.103695	query_1	['GO:0065009']
266	GO:BP	GO:0150063	visual system development	1.87252e-07	TRUE	"The process whose specific outcome is the progression of the visual system over time, from its formation to the mature structure, including the eye, parts of the central nervous system (CNS) involved in processing of visual inputs, and connecting nerve pathways." [GOC:aruk, GOC:bc, GOC:krc, PMID:15004427, PMID:20647017, PMID:22632727]	400	1346	62	21118	0.0460624	0.155	query_1	['GO:0048880']
267	GO:BP	GO:0016569	covalent chromatin modification	1.87916e-07	TRUE	"The alteration of DNA or protein in chromatin by the covalent addition or removal of chemical groups." [GOC:mah, GOC:vw]	480	1346	70	21118	0.0520059	0.145833	query_1	['GO:0006325', 'GO:0043412']
268	GO:BP	GO:0006996	organelle organization	2.41945e-07	TRUE	"A process that is carried out at the cellular level which results in the assembly, arrangement of constituent parts, or disassembly of an organelle within a cell. An organelle is an organized structure of distinctive morphology and function. Includes the nucleus, mitochondria, plastids, vacuoles, vesicles, ribosomes and the cytoskeleton. Excludes the plasma membrane." [GOC:mah]	3798	1346	333	21118	0.2474	0.0876777	query_1	['GO:0016043']
269	GO:BP	GO:0051179	localization	3.30448e-07	TRUE	"Any process in which a cell, a substance, or a cellular entity, such as a protein complex or organelle, is transported, tethered to or otherwise maintained in a specific location. In the case of substances, localization may also be achieved via selective degradation." [GOC:ai, GOC:dos]	6168	1346	498	21118	0.369985	0.0807393	query_1	['GO:0008150']
270	GO:BP	GO:0048705	skeletal system morphogenesis	3.42721e-07	TRUE	"The process in which the anatomical structures of the skeleton are generated and organized." [GOC:dph, GOC:dsf, GOC:jid, GOC:tb]	237	1346	44	21118	0.0326895	0.185654	query_1	['GO:0001501', 'GO:0009887']
271	GO:BP	GO:0009725	response to hormone	3.43879e-07	TRUE	"Any process that results in a change in state or activity of a cell or an organism (in terms of movement, secretion, enzyme production, gene expression, etc.) as a result of a hormone stimulus." [GOC:jl]	912	1346	109	21118	0.0809807	0.119518	query_1	['GO:0009719', 'GO:0010033']
272	GO:BP	GO:0043549	regulation of kinase activity	3.75366e-07	TRUE	"Any process that modulates the frequency, rate or extent of kinase activity, the catalysis of the transfer of a phosphate group, usually from ATP, to a substrate molecule." [GOC:bf]	845	1346	103	21118	0.076523	0.121893	query_1	['GO:0042325', 'GO:0051338']
273	GO:BP	GO:0030330	DNA damage response, signal transduction by p53 class mediator	3.87264e-07	TRUE	"A cascade of processes induced by the cell cycle regulator phosphoprotein p53, or an equivalent protein, in response to the detection of DNA damage." [GOC:go_curators]	63	1346	21	21118	0.0156018	0.333333	query_1	['GO:0042770', 'GO:0072331']
274	GO:BP	GO:0045444	fat cell differentiation	4.03892e-07	TRUE	"The process in which a relatively unspecialized cell acquires specialized features of an adipocyte, an animal connective tissue cell specialized for the synthesis and storage of fat." [CL:0000136, GOC:go_curators]	247	1346	45	21118	0.0334324	0.182186	query_1	['GO:0030154']
275	GO:BP	GO:0048568	embryonic organ development	4.07126e-07	TRUE	"Development, taking place during the embryonic phase, of a tissue or tissues that work together to perform a specific function or functions. Development pertains to the process whose specific outcome is the progression of a structure over time, from its formation to the mature structure. Organs are commonly observed as visibly distinct structures, but may also exist as loosely associated cluster…	478	1346	69	21118	0.051263	0.144351	query_1	['GO:0009790', 'GO:0048513']
276	GO:BP	GO:0000165	MAPK cascade	5.20862e-07	TRUE	"An intracellular protein kinase cascade containing at least a MAPK, a MAPKK and a MAP3K. The cascade can also contain an additional tiers: the upstream MAP4K. The kinases in each tier phosphorylate and activate the kinase in the downstream tier to transmit a signal within a cell." [GOC:bf, GOC:mtg_signaling_feb11, PMID:20811974, PMID:9561267]	771	1346	96	21118	0.0713224	0.124514	query_1	['GO:0035556']
277	GO:BP	GO:0043069	negative regulation of programmed cell death	6.09273e-07	TRUE	"Any process that stops, prevents, or reduces the frequency, rate or extent of programmed cell death, cell death resulting from activation of endogenous cellular processes." [GOC:jl]	1002	1346	116	21118	0.0861813	0.115768	query_1	['GO:0012501', 'GO:0043067', 'GO:0060548']
278	GO:BP	GO:0030335	positive regulation of cell migration	7.00533e-07	TRUE	"Any process that activates or increases the frequency, rate or extent of cell migration." [GOC:go_curators]	557	1346	76	21118	0.0564636	0.136445	query_1	['GO:0016477', 'GO:0030334', 'GO:2000147']
279	GO:BP	GO:0045859	regulation of protein kinase activity	7.15106e-07	TRUE	"Any process that modulates the frequency, rate or extent of protein kinase activity." [GOC:go_curators]	742	1346	93	21118	0.0690936	0.125337	query_1	['GO:0001932', 'GO:0043549']
280	GO:BP	GO:0051216	cartilage development	7.40055e-07	TRUE	"The process whose specific outcome is the progression of a cartilage element over time, from its formation to the mature structure. Cartilage elements are skeletal elements that consist of connective tissue dominated by extracellular matrix containing collagen type II and large amounts of proteoglycan, particularly chondroitin sulfate." [GOC:cjm, PMID:23251424]	199	1346	39	21118	0.0289747	0.19598	query_1	['GO:0001501', 'GO:0048513', 'GO:0061448']
281	GO:BP	GO:0010628	positive regulation of gene expression	7.50713e-07	TRUE	"Any process that increases the frequency, rate or extent of gene expression. Gene expression is the process in which a gene's coding sequence is converted into a mature gene product or products (proteins or RNA). This includes the production of an RNA transcript as well as any processing to produce a mature RNA product or an mRNA or circRNA (for protein-coding genes) and the translation of that …	1171	1346	130	21118	0.0965825	0.111016	query_1	['GO:0010467', 'GO:0010468', 'GO:0010604']
282	GO:BP	GO:0042327	positive regulation of phosphorylation	8.46789e-07	TRUE	"Any process that activates or increases the frequency, rate or extent of addition of phosphate groups to a molecule." [GOC:jl]	903	1346	107	21118	0.0794948	0.118494	query_1	['GO:0016310', 'GO:0042325', 'GO:0045937']
283	GO:BP	GO:2000147	positive regulation of cell motility	8.79115e-07	TRUE	"Any process that activates or increases the frequency, rate or extent of cell motility." [GOC:mah]	581	1346	78	21118	0.0579495	0.134251	query_1	['GO:0040017', 'GO:0048870', 'GO:0051272', 'GO:2000145']
284	GO:BP	GO:0001933	negative regulation of protein phosphorylation	9.16484e-07	TRUE	"Any process that stops, prevents or reduces the rate of addition of phosphate groups to amino acids within a protein." [GOC:hjd]	366	1346	57	21118	0.0423477	0.155738	query_1	['GO:0001932', 'GO:0006468', 'GO:0031400', 'GO:0042326']
285	GO:BP	GO:0071396	cellular response to lipid	9.19862e-07	TRUE	"Any process that results in a change in state or activity of a cell (in terms of movement, secretion, enzyme production, gene expression, etc.) as a result of a lipid stimulus." [GOC:mah]	603	1346	80	21118	0.0594354	0.13267	query_1	['GO:0033993', 'GO:0071310']
286	GO:BP	GO:0051338	regulation of transferase activity	9.47346e-07	TRUE	"Any process that modulates the frequency, rate or extent of transferase activity, the catalysis of the transfer of a group, e.g. a methyl group, glycosyl group, acyl group, phosphorus-containing, or other groups, from one compound (generally regarded as the donor) to another compound (generally regarded as the acceptor). Transferase is the systematic name for any enzyme of EC class 2." [EC:2.-.-…	951	1346	111	21118	0.0824666	0.116719	query_1	['GO:0050790']
287	GO:BP	GO:0045165	cell fate commitment	1.01302e-06	TRUE	"The commitment of cells to specific cell fates and their capacity to differentiate into particular kinds of cells. Positional information is established through protein signals that emanate from a localized source within a cell (the initial one-cell zygote) or within a developmental field." [ISBN:0716731185]	272	1346	47	21118	0.0349183	0.172794	query_1	['GO:0030154', 'GO:0048869']
288	GO:BP	GO:0042326	negative regulation of phosphorylation	1.06382e-06	TRUE	"Any process that stops, prevents or decreases the rate of addition of phosphate groups to a molecule." [GOC:jl]	407	1346	61	21118	0.0453195	0.149877	query_1	['GO:0016310', 'GO:0042325', 'GO:0045936']
289	GO:BP	GO:0048584	positive regulation of response to stimulus	1.18543e-06	TRUE	"Any process that activates, maintains or increases the rate of a response to a stimulus. Response to stimulus is a change in state or activity of a cell or an organism (in terms of movement, secretion, enzyme production, gene expression, etc.) as a result of a stimulus." [GOC:jid]	2198	1346	211	21118	0.156761	0.0959964	query_1	['GO:0048518', 'GO:0048583', 'GO:0050896']
290	GO:BP	GO:0030111	regulation of Wnt signaling pathway	1.31182e-06	TRUE	"Any process that modulates the frequency, rate or extent of the activity of the Wnt signal transduction pathway." [GOC:dph, GOC:mah, GOC:tb]	302	1346	50	21118	0.0371471	0.165563	query_1	['GO:0009966', 'GO:0016055']
291	GO:BP	GO:0043066	negative regulation of apoptotic process	1.34348e-06	TRUE	"Any process that stops, prevents, or reduces the frequency, rate or extent of cell death by apoptotic process." [GOC:jl, GOC:mtg_apoptosis]	980	1346	113	21118	0.0839525	0.115306	query_1	['GO:0006915', 'GO:0042981', 'GO:0043069']
292	GO:BP	GO:1902533	positive regulation of intracellular signal transduction	1.39973e-06	TRUE	"Any process that activates or increases the frequency, rate or extent of intracellular signal transduction." [GOC:BHF, GOC:dph, GOC:signaling, GOC:tb, GOC:TermGenie]	969	1346	112	21118	0.0832095	0.115583	query_1	['GO:0009967', 'GO:0035556', 'GO:1902531']
293	GO:BP	GO:0016049	cell growth	1.45451e-06	TRUE	"The process in which a cell irreversibly increases in size over time by accretion and biosynthetic production of matter similar to that already present." [GOC:ai]	492	1346	69	21118	0.051263	0.140244	query_1	['GO:0009987', 'GO:0040007']
294	GO:BP	GO:0051272	positive regulation of cellular component movement	1.45586e-06	TRUE	"Any process that activates or increases the frequency, rate or extent of the movement of a cellular component." [GOC:ai, GOC:dph, GOC:jl]	598	1346	79	21118	0.0586924	0.132107	query_1	['GO:0006928', 'GO:0048522', 'GO:0051270']
295	GO:BP	GO:0040017	positive regulation of locomotion	1.45586e-06	TRUE	"Any process that activates or increases the frequency, rate or extent of locomotion of a cell or organism." [GOC:go_curators]	598	1346	79	21118	0.0586924	0.132107	query_1	['GO:0040011', 'GO:0040012', 'GO:0048518']
296	GO:BP	GO:0045937	positive regulation of phosphate metabolic process	1.5156e-06	TRUE	"Any process that activates or increases the frequency, rate or extent of the chemical reactions and pathways involving phosphates." [GOC:go_curators]	982	1346	113	21118	0.0839525	0.115071	query_1	['GO:0006796', 'GO:0010562', 'GO:0019220']
297	GO:BP	GO:0010562	positive regulation of phosphorus metabolic process	1.5156e-06	TRUE	"Any process that increases the frequency, rate or extent of the chemical reactions and pathways involving phosphorus or compounds containing phosphorus." [GOC:dph, GOC:tb]	982	1346	113	21118	0.0839525	0.115071	query_1	['GO:0006793', 'GO:0031325', 'GO:0051174']
298	GO:BP	GO:0048608	reproductive structure development	1.52944e-06	TRUE	"The reproductive developmental process whose specific outcome is the progression of structures that will be used in the process of creating new individuals from one or more parents, from their formation to the mature structures." [GOC:dph, GOC:isa_complete, GOC:jid]	503	1346	70	21118	0.0520059	0.139165	query_1	['GO:0003006', 'GO:0048856', 'GO:0061458']
299	GO:BP	GO:0060284	regulation of cell development	1.6948e-06	TRUE	"Any process that modulates the rate, frequency or extent of the progression of the cell over time, from its formation to the mature structure. Cell development does not include the steps involved in committing a cell to a specific fate." [GOC:dph, GOC:tb]	557	1346	75	21118	0.0557207	0.13465	query_1	['GO:0045595', 'GO:0048468']
300	GO:BP	GO:0048736	appendage development	1.86924e-06	TRUE	"The process whose specific outcome is the progression of an appendage over time, from its formation to the mature structure. An appendage is an organ or part that is attached to the trunk of an organism, such as a limb or a branch." [GOC:jid, GOC:rc]	188	1346	37	21118	0.0274889	0.196809	query_1	['GO:0007275', 'GO:0048856']
301	GO:BP	GO:0060173	limb development	1.86924e-06	TRUE	"The process whose specific outcome is the progression of a limb over time, from its formation to the mature structure. A limb is an appendage of an animal used for locomotion or grasping. Examples include legs, arms or some types of fin." [GOC:dgh, GOC:dph, PMID:11487378]	188	1346	37	21118	0.0274889	0.196809	query_1	['GO:0048736']
302	GO:BP	GO:0045936	negative regulation of phosphate metabolic process	2.14898e-06	TRUE	"Any process that stops, prevents, or reduces the frequency, rate or extent of the chemical reactions and pathways involving phosphates." [GOC:go_curators]	528	1346	72	21118	0.0534918	0.136364	query_1	['GO:0006796', 'GO:0010563', 'GO:0019220']
303	GO:BP	GO:0010563	negative regulation of phosphorus metabolic process	2.14898e-06	TRUE	"Any process that decreases the frequency, rate or extent of the chemical reactions and pathways involving phosphorus or compounds containing phosphorus." [GOC:dph, GOC:tb]	528	1346	72	21118	0.0534918	0.136364	query_1	['GO:0006793', 'GO:0031324', 'GO:0051174']
304	GO:BP	GO:0061458	reproductive system development	2.35746e-06	TRUE	"The progression of the reproductive system over time from its formation to the mature structure. The reproductive system consists of the organs that function in reproduction." [GOC:dph]	508	1346	70	21118	0.0520059	0.137795	query_1	['GO:0048731']
305	GO:BP	GO:0030326	embryonic limb morphogenesis	2.59486e-06	TRUE	"The process, occurring in the embryo, by which the anatomical structures of the limb are generated and organized. A limb is an appendage of an animal used for locomotion or grasping." [GOC:bf, GOC:jl, ISBN:0395825172]	133	1346	30	21118	0.0222883	0.225564	query_1	['GO:0035108', 'GO:0035113']
306	GO:BP	GO:0035113	embryonic appendage morphogenesis	2.59486e-06	TRUE	"The process, occurring in the embryo, by which the anatomical structures of the appendage are generated and organized. An appendage is an organ or part that is attached to the trunk of an organism, such as a limb or a branch." [ISBN:0582227089]	133	1346	30	21118	0.0222883	0.225564	query_1	['GO:0035107', 'GO:0048598']
307	GO:BP	GO:0030856	regulation of epithelial cell differentiation	2.70534e-06	TRUE	"Any process that modulates the frequency, rate or extent of epithelial cell differentiation." [GOC:mah]	149	1346	32	21118	0.0237741	0.214765	query_1	['GO:0030855', 'GO:0045595', 'GO:2000026']
308	GO:BP	GO:0051402	neuron apoptotic process	2.94266e-06	TRUE	"Any apoptotic process in a neuron, the basic cellular unit of nervous tissue. Each neuron consists of a body, an axon, and dendrites. Their purpose is to receive, conduct, and transmit impulses in the nervous system." [CL:0000540, GOC:mtg_apoptosis, MeSH:A.08.663]	290	1346	48	21118	0.0356612	0.165517	query_1	['GO:0006915', 'GO:0070997']
309	GO:BP	GO:0071900	regulation of protein serine/threonine kinase activity	3.39899e-06	TRUE	"Any process that modulates the rate, frequency, or extent of protein serine/threonine kinase activity." [GOC:mah]	460	1346	65	21118	0.0482912	0.141304	query_1	['GO:0045859']
310	GO:BP	GO:2001233	regulation of apoptotic signaling pathway	4.2958e-06	TRUE	"Any process that modulates the frequency, rate or extent of apoptotic signaling pathway." [GOC:mtg_apoptosis]	381	1346	57	21118	0.0423477	0.149606	query_1	['GO:0009966', 'GO:0042981', 'GO:0097190']
311	GO:BP	GO:0051271	negative regulation of cellular component movement	4.63701e-06	TRUE	"Any process that stops, prevents, or reduces the frequency, rate or extent of the movement of a cellular component." [GOC:ai, GOC:dph, GOC:jl]	313	1346	50	21118	0.0371471	0.159744	query_1	['GO:0006928', 'GO:0048523', 'GO:0051270']
312	GO:BP	GO:0080134	regulation of response to stress	4.77356e-06	TRUE	"Any process that modulates the frequency, rate or extent of a response to stress. Response to stress is a change in state or activity of a cell or an organism (in terms of movement, secretion, enzyme production, gene expression, etc.) as a result of a disturbance in organismal or cellular homeostasis, usually, but not necessarily, exogenous (e.g. temperature, humidity, ionizing radiation)." [GOC…	1254	1346	134	21118	0.0995542	0.106858	query_1	['GO:0006950', 'GO:0048583']
313	GO:BP	GO:0050673	epithelial cell proliferation	5.45949e-06	TRUE	"The multiplication or reproduction of epithelial cells, resulting in the expansion of a cell population. Epithelial cells make up the epithelium, the covering of internal and external surfaces of the body, including the lining of vessels and other small cavities. It consists of cells joined by small amounts of cementing substances." [ISBN:0721662544]	424	1346	61	21118	0.0453195	0.143868	query_1	['GO:0008283']
314	GO:BP	GO:0034097	response to cytokine	6.08364e-06	TRUE	"Any process that results in a change in state or activity of a cell or an organism (in terms of movement, secretion, enzyme production, gene expression, etc.) as a result of a cytokine stimulus." [GOC:sl]	935	1346	107	21118	0.0794948	0.114439	query_1	['GO:0010033']
315	GO:BP	GO:1903131	mononuclear cell differentiation	6.20547e-06	TRUE	"The process in which a relatively unspecialized cell acquires the specialized features of a mononuclear cell." [CL:0000842, GO_REF:0000086, GOC:TermGenie, PMID:24759906]	446	1346	63	21118	0.0468053	0.141256	query_1	['GO:0002521']
316	GO:BP	GO:0007389	pattern specification process	6.20547e-06	TRUE	"Any developmental process that results in the creation of defined areas or spaces within an organism to which cells respond and eventually are instructed to differentiate." [GOC:go_curators, GOC:isa_complete, ISBN:0521436125]	446	1346	63	21118	0.0468053	0.141256	query_1	['GO:0007275', 'GO:0032501']
317	GO:BP	GO:0060840	artery development	6.26935e-06	TRUE	"The progression of the artery over time, from its initial formation to the mature structure. An artery is a blood vessel that carries blood away from the heart to a capillary bed." [GOC:dph, GOC:sdb_2009, GOC:tb]	107	1346	26	21118	0.0193165	0.242991	query_1	['GO:0001568']
318	GO:BP	GO:0043523	regulation of neuron apoptotic process	6.34952e-06	TRUE	"Any process that modulates the occurrence or rate of cell death by apoptotic process in neurons." [GOC:go_curators, GOC:mtg_apoptosis]	259	1346	44	21118	0.0326895	0.169884	query_1	['GO:0042981', 'GO:0051402', 'GO:1901214']
319	GO:BP	GO:0050790	regulation of catalytic activity	6.52029e-06	TRUE	"Any process that modulates the activity of an enzyme." [GOC:ai, GOC:ebc, GOC:vw]	2308	1346	216	21118	0.160475	0.0935875	query_1	['GO:0065009']
320	GO:BP	GO:0023052	signaling	6.80655e-06	TRUE	"The entirety of a process in which information is transmitted within a biological system. This process begins with an active signal and ends when a cellular response has been triggered." [GOC:mtg_signal, GOC:mtg_signaling_feb11, GOC:signaling]	7227	1346	561	21118	0.41679	0.0776256	query_1	['GO:0008150']
321	GO:BP	GO:0043405	regulation of MAP kinase activity	7.03162e-06	TRUE	"Any process that modulates the frequency, rate or extent of MAP kinase activity." [GOC:dph, GOC:go_curators]	288	1346	47	21118	0.0349183	0.163194	query_1	['GO:0071900']
322	GO:BP	GO:0007154	cell communication	7.44211e-06	TRUE	"Any process that mediates interactions between a cell and its surroundings. Encompasses interactions such as signaling or attachment between one cell and another cell, between a cell and an extracellular matrix, or between a cell and any other aspect of its environment." [GOC:mah]	7291	1346	565	21118	0.419762	0.0774928	query_1	['GO:0009987']
323	GO:BP	GO:0008284	positive regulation of cell population proliferation	7.44869e-06	TRUE	"Any process that activates or increases the rate or extent of cell proliferation." [GOC:go_curators]	1045	1346	116	21118	0.0861813	0.111005	query_1	['GO:0008283', 'GO:0042127', 'GO:0048522']
324	GO:BP	GO:0003205	cardiac chamber development	8.75764e-06	TRUE	"The progression of a cardiac chamber over time, from its formation to the mature structure. A cardiac chamber is an enclosed cavity within the heart." [GOC:mtg_heart]	181	1346	35	21118	0.026003	0.19337	query_1	['GO:0007507', 'GO:0048856']
325	GO:BP	GO:0043010	camera-type eye development	9.46469e-06	TRUE	"The process whose specific outcome is the progression of the camera-type eye over time, from its formation to the mature structure. The camera-type eye is an organ of sight that receives light through an aperture and focuses it through a lens, projecting it on a photoreceptor field." [GOC:go_curators, GOC:mtg_sensu]	349	1346	53	21118	0.0393759	0.151862	query_1	['GO:0001654']
326	GO:BP	GO:0050678	regulation of epithelial cell proliferation	9.52002e-06	TRUE	"Any process that modulates the frequency, rate or extent of epithelial cell proliferation." [GOC:ai]	359	1346	54	21118	0.0401189	0.150418	query_1	['GO:0042127', 'GO:0050673']
327	GO:BP	GO:0051726	regulation of cell cycle	1.09267e-05	TRUE	"Any process that modulates the rate or extent of progression through the cell cycle." [GOC:ai, GOC:dph, GOC:tb]	898	1346	103	21118	0.076523	0.114699	query_1	['GO:0007049', 'GO:0050794']
328	GO:BP	GO:0051248	negative regulation of protein metabolic process	1.33791e-05	TRUE	"Any process that stops, prevents, or reduces the frequency, rate or extent of chemical reactions and pathways involving a protein." [GOC:ai]	1128	1346	122	21118	0.0906389	0.108156	query_1	['GO:0010605', 'GO:0019538', 'GO:0051172', 'GO:0051246']
329	GO:BP	GO:0051049	regulation of transport	1.46097e-05	TRUE	"Any process that modulates the frequency, rate or extent of the directed movement of substances (such as macromolecules, small molecules, ions) into, out of or within a cell, or between cells, by means of some agent such as a transporter or pore." [GOC:ai]	1871	1346	181	21118	0.134473	0.0967397	query_1	['GO:0006810', 'GO:0032879']
330	GO:BP	GO:0035265	organ growth	1.47789e-05	TRUE	"The increase in size or mass of an organ. Organs are commonly observed as visibly distinct structures, but may also exist as loosely associated clusters of cells that function together as to perform a specific function." [GOC:bf, ISBN:0471245208, ISBN:0721662544]	202	1346	37	21118	0.0274889	0.183168	query_1	['GO:0032501', 'GO:0048589']
331	GO:BP	GO:0002521	leukocyte differentiation	1.51406e-05	TRUE	"The process in which a relatively unspecialized hemopoietic precursor cell acquires the specialized features of a leukocyte. A leukocyte is an achromatic cell of the myeloid or lymphoid lineages capable of ameboid movement, found in blood or other tissue." [CL:0000738, GOC:add, PMID:16551264]	574	1346	74	21118	0.0549777	0.12892	query_1	['GO:0030097', 'GO:0030154']
332	GO:BP	GO:0043408	regulation of MAPK cascade	1.5702e-05	TRUE	"Any process that modulates the frequency, rate or extent of signal transduction mediated by the MAP kinase (MAPK) cascade." [GOC:go_curators]	708	1346	86	21118	0.063893	0.121469	query_1	['GO:0000165', 'GO:1902531']
333	GO:BP	GO:0042476	odontogenesis	1.60839e-05	TRUE	"The process whose specific outcome is the progression of a tooth or teeth over time, from formation to the mature structure(s). A tooth is any hard bony, calcareous, or chitinous organ found in the mouth or pharynx of an animal and used in procuring or masticating food." [GOC:jl, GOC:mah]	127	1346	28	21118	0.0208024	0.220472	query_1	['GO:0009887']
334	GO:BP	GO:0007049	cell cycle	1.75805e-05	TRUE	"The progression of biochemical and morphological phases and events that occur in a cell during successive cell replication or nuclear replication events. Canonically, the cell cycle comprises the replication and segregation of genetic material followed by the division of the cell, but in endocycles or syncytial cells nuclear replication or nuclear division may not be followed by cell division." …	1657	1346	164	21118	0.121842	0.098974	query_1	['GO:0009987']
335	GO:BP	GO:0051276	chromosome organization	1.76275e-05	TRUE	"A process that is carried out at the cellular level that results in the assembly, arrangement of constituent parts, or disassembly of chromosomes, structures composed of a very long molecule of DNA and associated proteins that carries hereditary information. This term covers covalent modifications at the molecular level as well as spatial relationships among the major components of a chromosome.…	1182	1346	126	21118	0.0936107	0.106599	query_1	['GO:0006996']
336	GO:BP	GO:0051716	cellular response to stimulus	1.95746e-05	TRUE	"Any process that results in a change in state or activity of a cell (in terms of movement, secretion, enzyme production, gene expression, etc.) as a result of a stimulus. The process begins with detection of the stimulus by a cell and ends with a change in state or activity or the cell." [GOC:bf, GOC:jl]	8351	1346	632	21118	0.469539	0.0756796	query_1	['GO:0009987', 'GO:0050896']
337	GO:BP	GO:0003279	cardiac septum development	2.16458e-05	TRUE	"The progression of a cardiac septum over time, from its initial formation to the mature structure." [GOC:mtg_heart]	113	1346	26	21118	0.0193165	0.230088	query_1	['GO:0003205', 'GO:0048856']
338	GO:BP	GO:0030336	negative regulation of cell migration	2.32202e-05	TRUE	"Any process that stops, prevents, or reduces the frequency, rate or extent of cell migration." [GOC:go_curators]	289	1346	46	21118	0.0341753	0.15917	query_1	['GO:0016477', 'GO:0030334', 'GO:2000146']
339	GO:BP	GO:0072006	nephron development	2.5469e-05	TRUE	"The process whose specific outcome is the progression of the nephron over time, from its formation to the mature structure. A nephron is the functional unit of the kidney." [GOC:mtg_kidney_jan10]	154	1346	31	21118	0.0230312	0.201299	query_1	['GO:0001822', 'GO:0048856']
340	GO:BP	GO:0060537	muscle tissue development	2.72353e-05	TRUE	"The progression of muscle tissue over time, from its initial formation to its mature state. Muscle tissue is a contractile tissue made up of actin and myosin fibers." [GOC:dph]	442	1346	61	21118	0.0453195	0.138009	query_1	['GO:0009888']
341	GO:BP	GO:0002062	chondrocyte differentiation	3.00111e-05	TRUE	"The process in which a chondroblast acquires specialized structural and/or functional features of a chondrocyte. A chondrocyte is a polymorphic cell that forms cartilage." [GOC:dph]	107	1346	25	21118	0.0185736	0.233645	query_1	['GO:0030154', 'GO:0051216']
342	GO:BP	GO:0090130	tissue migration	3.05603e-05	TRUE	"The process in which the population of cells that make up a tissue undergo directed movement." [GOC:ascb_2009, GOC:dph, GOC:tb]	311	1346	48	21118	0.0356612	0.154341	query_1	['GO:0032501']
343	GO:BP	GO:1902893	regulation of pri-miRNA transcription by RNA polymerase II	3.08298e-05	TRUE	"Any process that modulates the frequency, rate or extent of pri-miRNA transcription mediated by RNA polymerase II." [GO_REF:0000058, GOC:dph, GOC:kmv, GOC:TermGenie, PMID:24699545]	52	1346	17	21118	0.01263	0.326923	query_1	['GO:0006357', 'GO:0061614']
344	GO:BP	GO:0048546	digestive tract morphogenesis	3.08298e-05	TRUE	"The process in which the anatomical structures of the digestive tract are generated and organized. The digestive tract is the anatomical structure through which food passes and is processed." [GOC:dph, GOC:go_curators, PMID:12618131]	52	1346	17	21118	0.01263	0.326923	query_1	['GO:0035239', 'GO:0048565']
345	GO:BP	GO:0045664	regulation of neuron differentiation	3.3266e-05	TRUE	"Any process that modulates the frequency, rate or extent of neuron differentiation." [GOC:go_curators]	217	1346	38	21118	0.0282318	0.175115	query_1	['GO:0030182', 'GO:0045595']
346	GO:BP	GO:0007178	transmembrane receptor protein serine/threonine kinase signaling pathway	3.45433e-05	TRUE	"A series of molecular signals initiated by the binding of an extracellular ligand to a receptor on the surface of the target cell where the receptor possesses serine/threonine kinase activity, and ending with regulation of a downstream cellular process, e.g. transcription." [GOC:mah, GOC:signaling]	352	1346	52	21118	0.038633	0.147727	query_1	['GO:0007167']
347	GO:BP	GO:0030178	negative regulation of Wnt signaling pathway	3.50961e-05	TRUE	"Any process that stops, prevents, or reduces the frequency, rate or extent of the Wnt signaling pathway." [GOC:dph, GOC:go_curators, GOC:tb]	156	1346	31	21118	0.0230312	0.198718	query_1	['GO:0009968', 'GO:0016055', 'GO:0030111']
348	GO:BP	GO:2000146	negative regulation of cell motility	3.69466e-05	TRUE	"Any process that stops, prevents, or reduces the frequency, rate or extent of cell motility." [GOC:mah]	303	1346	47	21118	0.0349183	0.155116	query_1	['GO:0040013', 'GO:0048870', 'GO:0051271', 'GO:2000145']
349	GO:BP	GO:0045926	negative regulation of growth	3.72701e-05	TRUE	"Any process that stops, prevents or reduces the rate or extent of growth, the increase in size or mass of all or part of an organism." [GOC:go_curators]	255	1346	42	21118	0.0312036	0.164706	query_1	['GO:0040007', 'GO:0040008', 'GO:0048519']
350	GO:BP	GO:1902895	positive regulation of pri-miRNA transcription by RNA polymerase II	3.92411e-05	TRUE	"Any process that activates or increases the frequency, rate or extent of pri-miRNA transcription mediated by RNA polymerase II." [GO_REF:0000058, GOC:dph, GOC:kmv, GOC:TermGenie, PMID:24699545]	41	1346	15	21118	0.0111441	0.365854	query_1	['GO:0045944', 'GO:0061614', 'GO:1902893']
351	GO:BP	GO:1901214	regulation of neuron death	4.1384e-05	TRUE	"Any process that modulates the frequency, rate or extent of neuron death." [GOC:rph, GOC:TermGenie]	364	1346	53	21118	0.0393759	0.145604	query_1	['GO:0010941', 'GO:0070997']
352	GO:BP	GO:0061614	pri-miRNA transcription by RNA polymerase II	4.27049e-05	TRUE	"The cellular synthesis of primary microRNA (pri-miRNA) transcripts from a DNA template by RNA polymerase II, originating at an RNA polymerase II promoter. pri-miRNA transcripts are subsequently processed to produce the ~22nt miRNAs that function in gene regulation." [GOC:dph, GOC:kmv, PMID:18778799]	53	1346	17	21118	0.01263	0.320755	query_1	['GO:0006366']
353	GO:BP	GO:0090596	sensory organ morphogenesis	4.3256e-05	TRUE	"Morphogenesis of a sensory organ. A sensory organ is defined as a tissue or set of tissues that work together to receive and transmit signals from external or internal stimuli. Morphogenesis is the process in which anatomical structures are generated and organized. Organs are commonly observed as visibly distinct structures, but may also exist as loosely associated clusters of cells that work to…	285	1346	45	21118	0.0334324	0.157895	query_1	['GO:0007423', 'GO:0009887']
354	GO:BP	GO:0070997	neuron death	4.49739e-05	TRUE	"The process of cell death in a neuron." [GOC:BHF, GOC:mah]	406	1346	57	21118	0.0423477	0.140394	query_1	['GO:0008219']
355	GO:BP	GO:0042475	odontogenesis of dentin-containing tooth	4.53178e-05	TRUE	"The process whose specific outcome is the progression of a dentin-containing tooth over time, from its formation to the mature structure. A dentin-containing tooth is a hard, bony organ borne on the jaw or other bone of a vertebrate, and is composed mainly of dentin, a dense calcified substance, covered by a layer of enamel." [GOC:cjm, GOC:mah, GOC:mtg_sensu, PMID:10333884, PMID:15355794]	94	1346	23	21118	0.0170877	0.244681	query_1	['GO:0042476']
356	GO:BP	GO:0001558	regulation of cell growth	4.73661e-05	TRUE	"Any process that modulates the frequency, rate, extent or direction of cell growth." [GOC:go_curators]	417	1346	58	21118	0.0430906	0.139089	query_1	['GO:0016049', 'GO:0040008', 'GO:0051128']
357	GO:BP	GO:0032269	negative regulation of cellular protein metabolic process	4.87306e-05	TRUE	"Any process that stops, prevents, or reduces the frequency, rate or extent of the chemical reactions and pathways involving a protein, occurring at the level of an individual cell." [GOC:mah]	1068	1346	115	21118	0.0854383	0.107678	query_1	['GO:0031324', 'GO:0032268', 'GO:0044267', 'GO:0051248']
358	GO:BP	GO:0010975	regulation of neuron projection development	5.67882e-05	TRUE	"Any process that modulates the rate, frequency or extent of neuron projection development. Neuron projection development is the process whose specific outcome is the progression of a neuron projection over time, from its formation to the mature structure. A neuron projection is any process extending from a neural cell, such as axons or dendrites (collectively called neurites)." [GOC:dph, GOC:tb]	526	1346	68	21118	0.0505201	0.129278	query_1	['GO:0031175', 'GO:0120035']
359	GO:BP	GO:0042692	muscle cell differentiation	5.72843e-05	TRUE	"The process in which a relatively unspecialized cell acquires specialized features of a muscle cell." [CL:0000187, GOC:go_curators]	388	1346	55	21118	0.0408618	0.141753	query_1	['GO:0030154', 'GO:0061061']
360	GO:BP	GO:0051960	regulation of nervous system development	6.07417e-05	TRUE	"Any process that modulates the frequency, rate or extent of nervous system development, the origin and formation of nervous tissue." [GOC:ai]	516	1346	67	21118	0.0497771	0.129845	query_1	['GO:0007399', 'GO:2000026']
361	GO:BP	GO:0010720	positive regulation of cell development	6.22301e-05	TRUE	"Any process that increases the rate, frequency or extent of the progression of the cell over time, from its formation to the mature structure. Cell development does not include the steps involved in committing a cell to a specific fate." [GOC:BHF, GOC:dph, GOC:tb]	348	1346	51	21118	0.03789	0.146552	query_1	['GO:0045597', 'GO:0048468', 'GO:0060284']
362	GO:BP	GO:0060828	regulation of canonical Wnt signaling pathway	6.59295e-05	TRUE	"Any process that modulates the rate, frequency, or extent of the Wnt signaling pathway through beta-catenin, the series of molecular signals initiated by binding of a Wnt protein to a frizzled family receptor on the surface of the target cell, followed by propagation of the signal via beta-catenin, and ending with a change in transcription of target genes." [GOC:dph, GOC:sdb_2009, GOC:tb]	241	1346	40	21118	0.0297177	0.165975	query_1	['GO:0030111', 'GO:0060070']
363	GO:BP	GO:0090090	negative regulation of canonical Wnt signaling pathway	8.11097e-05	TRUE	"Any process that decreases the rate, frequency, or extent of the Wnt signaling pathway through beta-catenin, the series of molecular signals initiated by binding of a Wnt protein to a frizzled family receptor on the surface of the target cell, followed by propagation of the signal via beta-catenin, and ending with a change in transcription of target genes." [GOC:dph, GOC:tb]	128	1346	27	21118	0.0200594	0.210938	query_1	['GO:0030178', 'GO:0060070', 'GO:0060828']
364	GO:BP	GO:0009628	response to abiotic stimulus	8.49899e-05	TRUE	"Any process that results in a change in state or activity of a cell or an organism (in terms of movement, secretion, enzyme production, gene expression, etc.) as a result of an abiotic (not derived from living organisms) stimulus." [GOC:hb]	1177	1346	123	21118	0.0913819	0.104503	query_1	['GO:0050896']
365	GO:BP	GO:0042063	gliogenesis	9.23476e-05	TRUE	"The process that results in the generation of glial cells. This includes the production of glial progenitors and their differentiation into mature glia." [GOC:dgh, GOC:jid]	342	1346	50	21118	0.0371471	0.146199	query_1	['GO:0022008']
366	GO:BP	GO:0010631	epithelial cell migration	9.28384e-05	TRUE	"The orderly movement of an epithelial cell from one site to another, often during the development of a multicellular organism." [GOC:ascb_2009, GOC:BHF, GOC:dph, GOC:tb]	302	1346	46	21118	0.0341753	0.152318	query_1	['GO:0001667', 'GO:0090132']
367	GO:BP	GO:0035051	cardiocyte differentiation	0.000107241	TRUE	"The process in which a relatively unspecialized cell acquires the specialized structural and/or functional features of a cell that will form part of the cardiac organ of an individual." [GOC:bf]	172	1346	32	21118	0.0237741	0.186047	query_1	['GO:0007507', 'GO:0030154']
368	GO:BP	GO:0031346	positive regulation of cell projection organization	0.000116497	TRUE	"Any process that activates or increases the frequency, rate or extent of the process involved in the formation, arrangement of constituent parts, or disassembly of cell projections." [GOC:mah]	417	1346	57	21118	0.0423477	0.136691	query_1	['GO:0030030', 'GO:0031344', 'GO:0051130']
369	GO:BP	GO:0090092	regulation of transmembrane receptor protein serine/threonine kinase signaling pathway	0.000118235	TRUE	"Any process that modulates the rate, frequency, or extent of the series of molecular signals generated as a consequence of a transmembrane receptor serine/threonine kinase binding to its physiological ligand." [GOC:dph, GOC:tb]	246	1346	40	21118	0.0297177	0.162602	query_1	['GO:0007178', 'GO:0009966']
370	GO:BP	GO:0090132	epithelium migration	0.000125979	TRUE	"The process in which the population of cells that make up an epithelium undergo directed movement." [GOC:ascb_2009, GOC:dph, GOC:tb]	305	1346	46	21118	0.0341753	0.15082	query_1	['GO:0090130']
371	GO:BP	GO:0030098	lymphocyte differentiation	0.000126916	TRUE	"The process in which a relatively unspecialized precursor cell acquires specialized features of a lymphocyte. A lymphocyte is a leukocyte commonly found in the blood and lymph that has the characteristics of a large nucleus, a neutral staining cytoplasm, and prominent heterochromatin." [CL:0000542, GOC:go_curators]	397	1346	55	21118	0.0408618	0.138539	query_1	['GO:0046649', 'GO:1903131']
372	GO:BP	GO:0003013	circulatory system process	0.000128744	TRUE	"A organ system process carried out by any of the organs or tissues of the circulatory system. The circulatory system is an organ system that moves extracellular fluids to and from tissue within a multicellular organism." [GOC:mtg_cardio]	526	1346	67	21118	0.0497771	0.127376	query_1	['GO:0003008']
373	GO:BP	GO:1901215	negative regulation of neuron death	0.00013257	TRUE	"Any process that stops, prevents or reduces the frequency, rate or extent of neuron death." [GOC:rph, GOC:TermGenie]	247	1346	40	21118	0.0297177	0.161943	query_1	['GO:0060548', 'GO:0070997', 'GO:1901214']
374	GO:BP	GO:0040013	negative regulation of locomotion	0.000136982	TRUE	"Any process that stops, prevents, or reduces the frequency, rate or extent of locomotion of a cell or organism." [GOC:go_curators]	336	1346	49	21118	0.0364042	0.145833	query_1	['GO:0040011', 'GO:0040012', 'GO:0048519']
375	GO:BP	GO:0014706	striated muscle tissue development	0.000137816	TRUE	"The process whose specific outcome is the progression of a striated muscle over time, from its formation to the mature structure. Striated muscle contain fibers that are divided by transverse bands into striations, and cardiac and skeletal muscle are types of striated muscle. Skeletal muscle myoblasts fuse to form myotubes and eventually multinucleated muscle fibers. The fusion of cardiac cells …	419	1346	57	21118	0.0423477	0.136038	query_1	['GO:0060537']
376	GO:BP	GO:0042330	taxis	0.00013967	TRUE	"The directed movement of a motile cell or organism in response to an external stimulus." [GOC:jl, ISBN:0192801023]	605	1346	74	21118	0.0549777	0.122314	query_1	['GO:0009605', 'GO:0040011']
377	GO:BP	GO:0048638	regulation of developmental growth	0.000149145	TRUE	"Any process that modulates the frequency, rate or extent of developmental growth." [GOC:go_curators]	378	1346	53	21118	0.0393759	0.140212	query_1	['GO:0040008', 'GO:0048589', 'GO:0050793']
378	GO:BP	GO:0008544	epidermis development	0.000153963	TRUE	"The process whose specific outcome is the progression of the epidermis over time, from its formation to the mature structure. The epidermis is the outer epithelial layer of an animal, it may be a single layer that produces an extracellular material (e.g. the cuticle of arthropods) or a complex stratified squamous epithelium, as in the case of many vertebrate species." [GOC:go_curators, UBERON:00…	307	1346	46	21118	0.0341753	0.149837	query_1	['GO:0009888']
379	GO:BP	GO:0010718	positive regulation of epithelial to mesenchymal transition	0.000161046	TRUE	"Any process that increases the rate, frequency, or extent of epithelial to mesenchymal transition. Epithelial to mesenchymal transition is where an epithelial cell loses apical/basolateral polarity, severs intercellular adhesive junctions, degrades basement membrane components and becomes a migratory mesenchymal cell." [GOC:BHF, GOC:dph, GOC:tb]	51	1346	16	21118	0.0118871	0.313725	query_1	['GO:0001837', 'GO:0010717', 'GO:0045597', 'GO:0051240']
380	GO:BP	GO:0003002	regionalization	0.000162295	TRUE	"The pattern specification process that results in the subdivision of an axis or axes in space to define an area or volume in which specific patterns of cell differentiation will take place or in which cells interpret a specific environment." [GOC:dph, GOC:isa_complete]	348	1346	50	21118	0.0371471	0.143678	query_1	['GO:0007389']
381	GO:BP	GO:0030029	actin filament-based process	0.000167664	TRUE	"Any cellular process that depends upon or alters the actin cytoskeleton, that part of the cytoskeleton comprising actin filaments and their associated proteins." [GOC:mah]	792	1346	90	21118	0.0668648	0.113636	query_1	['GO:0009987']
382	GO:BP	GO:0030855	epithelial cell differentiation	0.000189924	TRUE	"The process in which a relatively unspecialized cell acquires specialized features of an epithelial cell, any of the cells making up an epithelium." [GOC:ecd, PMID:11839751]	655	1346	78	21118	0.0579495	0.119084	query_1	['GO:0030154', 'GO:0060429']
383	GO:BP	GO:0022610	biological adhesion	0.000205622	TRUE	"The attachment of a cell or organism to a substrate, another cell, or other organism. Biological adhesion includes intracellular attachment between membrane regions." [GOC:isa_complete]	1384	1346	138	21118	0.102526	0.099711	query_1	['GO:0008150']
384	GO:BP	GO:0007162	negative regulation of cell adhesion	0.00020616	TRUE	"Any process that stops, prevents, or reduces the frequency, rate or extent of cell adhesion." [GOC:go_curators]	290	1346	44	21118	0.0326895	0.151724	query_1	['GO:0007155', 'GO:0030155', 'GO:0048523']
385	GO:BP	GO:0007155	cell adhesion	0.000211556	TRUE	"The attachment of a cell, either to another cell or to an underlying substrate such as the extracellular matrix, via cell adhesion molecules." [GOC:hb, GOC:pf]	1372	1346	137	21118	0.101783	0.0998542	query_1	['GO:0009987', 'GO:0022610']
386	GO:BP	GO:0032870	cellular response to hormone stimulus	0.000213313	TRUE	"Any process that results in a change in state or activity of a cell (in terms of movement, secretion, enzyme production, gene expression, etc.) as a result of a hormone stimulus." [GOC:mah]	600	1346	73	21118	0.0542348	0.121667	query_1	['GO:0009725', 'GO:0071310', 'GO:0071495']
387	GO:BP	GO:0006935	chemotaxis	0.000213313	TRUE	"The directed movement of a motile cell or organism, or the directed growth of a cell guided by a specific chemical concentration gradient. Movement may be towards a higher concentration (positive chemotaxis) or towards a lower concentration (negative chemotaxis)." [ISBN:0198506732]	600	1346	73	21118	0.0542348	0.121667	query_1	['GO:0042221', 'GO:0042330']
388	GO:BP	GO:0045669	positive regulation of osteoblast differentiation	0.000215339	TRUE	"Any process that activates or increases the frequency, rate or extent of osteoblast differentiation." [GOC:go_curators]	72	1346	19	21118	0.0141159	0.263889	query_1	['GO:0001649', 'GO:0045597', 'GO:0045667']
389	GO:BP	GO:0072080	nephron tubule development	0.000218484	TRUE	"The progression of a nephron tubule over time, from its initial formation to the mature structure. A nephron tubule is an epithelial tube that is part of the nephron, the functional part of the kidney." [GOC:mtg_kidney_jan10]	94	1346	22	21118	0.0163447	0.234043	query_1	['GO:0061326', 'GO:0072009']
390	GO:BP	GO:0071345	cellular response to cytokine stimulus	0.000242126	TRUE	"Any process that results in a change in state or activity of a cell (in terms of movement, secretion, enzyme production, gene expression, etc.) as a result of a cytokine stimulus." [GOC:mah]	822	1346	92	21118	0.0683507	0.111922	query_1	['GO:0034097', 'GO:0071310']
391	GO:BP	GO:0097191	extrinsic apoptotic signaling pathway	0.000248792	TRUE	"A series of molecular signals in which a signal is conveyed from the cell surface to trigger the apoptotic death of a cell. The pathway starts with either a ligand binding to a cell surface receptor, or a ligand being withdrawn from a cell surface receptor (e.g. in the case of signaling by dependence receptors), and ends when the execution phase of apoptosis is triggered." [GOC:mtg_apoptosis, GO…	224	1346	37	21118	0.0274889	0.165179	query_1	['GO:0007166', 'GO:0097190']
392	GO:BP	GO:0048562	embryonic organ morphogenesis	0.000251715	TRUE	"Morphogenesis, during the embryonic phase, of a tissue or tissues that work together to perform a specific function or functions. Morphogenesis is the process in which anatomical structures are generated and organized. Organs are commonly observed as visibly distinct structures, but may also exist as loosely associated clusters of cells that work together to perform a specific function or functi…	312	1346	46	21118	0.0341753	0.147436	query_1	['GO:0009887', 'GO:0048568', 'GO:0048598']
393	GO:BP	GO:0034330	cell junction organization	0.000261043	TRUE	"A process that is carried out at the cellular level which results in the assembly, arrangement of constituent parts, or disassembly of a cell junction. A cell junction is a specialized region of connection between two cells or between a cell and the extracellular matrix." [GOC:dph, GOC:jl, GOC:mah]	741	1346	85	21118	0.0631501	0.11471	query_1	['GO:0016043']
394	GO:BP	GO:0098727	maintenance of cell number	0.0002729	TRUE	"Any process by which the numbers of cells of a particular type or in a tissue are maintained." [GOC:dos]	161	1346	30	21118	0.0222883	0.186335	query_1	['GO:0032502']
395	GO:BP	GO:0072132	mesenchyme morphogenesis	0.000295121	TRUE	"The process in which the anatomical structures of a mesenchymal tissue are generated and organized. A mesenchymal tissue is made up of loosely packed stellate cells." [GOC:mtg_kidney_jan10]	53	1346	16	21118	0.0118871	0.301887	query_1	['GO:0009887', 'GO:0048729', 'GO:0060485']
396	GO:BP	GO:0007411	axon guidance	0.000296709	TRUE	"The chemotaxis process that directs the migration of an axon growth cone to a specific target site in response to a combination of attractive and repulsive cues." [ISBN:0878932437]	235	1346	38	21118	0.0282318	0.161702	query_1	['GO:0007409', 'GO:0097485']
397	GO:BP	GO:0030155	regulation of cell adhesion	0.000299626	TRUE	"Any process that modulates the frequency, rate or extent of attachment of a cell to another cell or to the extracellular matrix." [GOC:mah]	720	1346	83	21118	0.0616642	0.115278	query_1	['GO:0007155', 'GO:0050794']
398	GO:BP	GO:0003206	cardiac chamber morphogenesis	0.000306447	TRUE	"The process in which a cardiac chamber is generated and organized. A cardiac chamber is an enclosed cavity within the heart." [GOC:mtg_heart]	136	1346	27	21118	0.0200594	0.198529	query_1	['GO:0003007', 'GO:0003205', 'GO:0009653']
399	GO:BP	GO:0043410	positive regulation of MAPK cascade	0.000309697	TRUE	"Any process that activates or increases the frequency, rate or extent of signal transduction mediated by the MAPK cascade." [GOC:go_curators]	516	1346	65	21118	0.0482912	0.125969	query_1	['GO:0000165', 'GO:0043408', 'GO:1902533']
400	GO:BP	GO:0010243	response to organonitrogen compound	0.000311092	TRUE	"Any process that results in a change in state or activity of a cell or an organism (in terms of movement, secretion, enzyme production, gene expression, etc.) as a result of an organonitrogen stimulus. An organonitrogen compound is formally a compound containing at least one carbon-nitrogen bond." [PMID:9869419]	1093	1346	114	21118	0.0846954	0.1043	query_1	['GO:0010033', 'GO:1901698']
401	GO:BP	GO:1901699	cellular response to nitrogen compound	0.000330493	TRUE	"Any process that results in a change in state or activity of a cell (in terms of movement, secretion, enzyme production, gene expression, etc.) as a result of a nitrogen compound stimulus." [GOC:pr, GOC:TermGenie]	710	1346	82	21118	0.0609212	0.115493	query_1	['GO:0070887', 'GO:1901698']
402	GO:BP	GO:0097485	neuron projection guidance	0.000332335	TRUE	"The process in which the migration of a neuron projection is directed to a specific target site in response to a combination of attractive and repulsive cues." [GOC:BHF, GOC:rl, PMID:22790009]	236	1346	38	21118	0.0282318	0.161017	query_1	['GO:0006928', 'GO:0006935', 'GO:0048812']
403	GO:BP	GO:0021537	telencephalon development	0.000339837	TRUE	"The process whose specific outcome is the progression of the telencephalon over time, from its formation to the mature structure. The telencephalon is the paired anteriolateral division of the prosencephalon plus the lamina terminalis from which the olfactory lobes, cerebral cortex, and subcortical nuclei are derived." [GO_REF:0000021, GOC:cls, GOC:dgh, GOC:dph, GOC:jid, PMID:12626695]	285	1346	43	21118	0.0319465	0.150877	query_1	['GO:0030900', 'GO:0048856']
404	GO:BP	GO:0060411	cardiac septum morphogenesis	0.000346598	TRUE	"The process in which the anatomical structure of a cardiac septum is generated and organized. A cardiac septum is a partition that separates parts of the heart." [GOC:dph, GOC:mtg_heart]	74	1346	19	21118	0.0141159	0.256757	query_1	['GO:0003206', 'GO:0003279', 'GO:0009653']
405	GO:BP	GO:0007369	gastrulation	0.000365273	TRUE	"A complex and coordinated series of cellular movements that occurs at the end of cleavage during embryonic development of most animals. The details of gastrulation vary from species to species, but usually result in the formation of the three primary germ layers, ectoderm, mesoderm and endoderm." [GOC:curators, ISBN:9780878933846]	190	1346	33	21118	0.0245171	0.173684	query_1	['GO:0048598']
406	GO:BP	GO:0071417	cellular response to organonitrogen compound	0.000380495	TRUE	"Any process that results in a change in state or activity of a cell (in terms of movement, secretion, enzyme production, gene expression, etc.) as a result of an organonitrogen stimulus. An organonitrogen compound is formally a compound containing at least one carbon-nitrogen bond." [GOC:mah]	643	1346	76	21118	0.0564636	0.118196	query_1	['GO:0010243', 'GO:0071310', 'GO:0071495', 'GO:1901699']
407	GO:BP	GO:1901698	response to nitrogen compound	0.000423368	TRUE	"Any process that results in a change in state or activity of a cell or an organism (in terms of movement, secretion, enzyme production, gene expression, etc.) as a result of a nitrogen compound stimulus." [GOC:pr, GOC:TermGenie]	1199	1346	122	21118	0.0906389	0.101751	query_1	['GO:0042221']
408	GO:BP	GO:0003281	ventricular septum development	0.000436676	TRUE	"The progression of the ventricular septum over time from its formation to the mature structure." [GOC:mtg_heart]	75	1346	19	21118	0.0141159	0.253333	query_1	['GO:0003231', 'GO:0003279']
409	GO:BP	GO:0051146	striated muscle cell differentiation	0.00045718	TRUE	"The process in which a relatively unspecialized cell acquires specialized features of a striated muscle cell; striated muscle fibers are divided by transverse bands into striations, and cardiac and voluntary muscle are types of striated muscle." [CL:0000737, GOC:ai]	298	1346	44	21118	0.0326895	0.147651	query_1	['GO:0042692']
410	GO:BP	GO:0090287	regulation of cellular response to growth factor stimulus	0.000458809	TRUE	"Any process that modulates the rate, frequency, or extent of a change in state or activity of a cell (in terms of movement, secretion, enzyme production, gene expression, etc.) as a result of a growth factor stimulus." [GOC:tb]	288	1346	43	21118	0.0319465	0.149306	query_1	['GO:0048583', 'GO:0050794', 'GO:0071363']
411	GO:BP	GO:0043534	blood vessel endothelial cell migration	0.000473304	TRUE	"The orderly movement of an endothelial cell into the extracellular matrix in order to form new blood vessels during angiogenesis." [PMID:11166264]	122	1346	25	21118	0.0185736	0.204918	query_1	['GO:0043542']
412	GO:BP	GO:0061326	renal tubule development	0.000481137	TRUE	"The progression of the renal tubule over time from its formation to the mature form. A renal tubule is a tube that filters, re-absorbs and secretes substances to rid an organism of waste and to play a role in fluid homeostasis." [GOC:dph, GOC:mtg_kidney_jan10]	98	1346	22	21118	0.0163447	0.22449	query_1	['GO:0035295', 'GO:0060429', 'GO:0072001']
413	GO:BP	GO:0033002	muscle cell proliferation	0.00048131	TRUE	"The expansion of a muscle cell population by cell division." [CL:0000187, GOC:mah]	249	1346	39	21118	0.0289747	0.156627	query_1	['GO:0008283']
414	GO:BP	GO:0080135	regulation of cellular response to stress	0.000504689	TRUE	"Any process that modulates the frequency, rate or extent of a cellular response to stress. Cellular response to stress is a change in state or activity of a cell (in terms of movement, secretion, enzyme production, gene expression, etc.) as a result of a stimulus indicating the organism is under stress. The stress is usually, but not necessarily, exogenous (e.g. temperature, humidity, ionizing r…	636	1346	75	21118	0.0557207	0.117925	query_1	['GO:0033554', 'GO:0050794', 'GO:0080134']
415	GO:BP	GO:0018205	peptidyl-lysine modification	0.000518629	TRUE	"The modification of peptidyl-lysine." [GOC:go_curators]	382	1346	52	21118	0.038633	0.136126	query_1	['GO:0018193']
416	GO:BP	GO:0120035	regulation of plasma membrane bounded cell projection organization	0.000522106	TRUE	"Any process that modulates the frequency, rate or extent of a process involved in the formation, arrangement of constituent parts, or disassembly of plasma membrane bounded cell projections." [GOC:krc]	706	1346	81	21118	0.0601783	0.114731	query_1	['GO:0031344', 'GO:0120036']
417	GO:BP	GO:0007165	signal transduction	0.000523922	TRUE	"The cellular process in which a signal is conveyed to trigger a change in the activity or state of a cell. Signal transduction begins with reception of a signal (e.g. a ligand binding to a receptor or receptor activation by a stimulus such as light), or for signal transduction in the absence of ligand, signal-withdrawal or the activity of a constitutively active receptor. Signal transduction end…	6780	1346	518	21118	0.384844	0.0764012	query_1	['GO:0007154', 'GO:0009987', 'GO:0023052', 'GO:0050794', 'GO:0051716']
418	GO:BP	GO:0019827	stem cell population maintenance	0.000539349	TRUE	"The process by which an organism or tissue maintains a population of stem cells of a single type. This can be achieved by a number of mechanisms: stem cell asymmetric division maintains stem cell numbers; stem cell symmetric division increases them; maintenance of a stem cell niche maintains the conditions for commitment to the stem cell fate for some types of stem cell; stem cells may arise de …	157	1346	29	21118	0.0215453	0.184713	query_1	['GO:0032501', 'GO:0098727']
419	GO:BP	GO:0048592	eye morphogenesis	0.000549908	TRUE	"The process in which the anatomical structures of the eye are generated and organized." [GOC:jid, GOC:mtg_sensu]	166	1346	30	21118	0.0222883	0.180723	query_1	['GO:0001654', 'GO:0090596']
420	GO:BP	GO:0051017	actin filament bundle assembly	0.000549908	TRUE	"The assembly of actin filament bundles; actin filaments are on the same axis but may be oriented with the same or opposite polarities and may be packed with different levels of tightness." [GOC:ai]	166	1346	30	21118	0.0222883	0.180723	query_1	['GO:0022607', 'GO:0061572']
421	GO:BP	GO:0010001	glial cell differentiation	0.000596226	TRUE	"The process in which a relatively unspecialized cell acquires the specialized features of a glial cell." [GOC:go_curators, GOC:mtg_sensu]	251	1346	39	21118	0.0289747	0.155378	query_1	['GO:0030154', 'GO:0042063']
422	GO:BP	GO:0030308	negative regulation of cell growth	0.000604735	TRUE	"Any process that stops, prevents, or reduces the frequency, rate, extent or direction of cell growth." [GOC:go_curators]	194	1346	33	21118	0.0245171	0.170103	query_1	['GO:0001558', 'GO:0016049', 'GO:0045926', 'GO:0048523']
423	GO:BP	GO:0009952	anterior/posterior pattern specification	0.00062674	TRUE	"The regionalization process in which specific areas of cell differentiation are determined along the anterior-posterior axis. The anterior-posterior axis is defined by a line that runs from the head or mouth of an organism to the tail or opposite end of the organism." [GOC:dph, GOC:go_curators, GOC:isa_complete, GOC:tb]	213	1346	35	21118	0.026003	0.164319	query_1	['GO:0003002']
424	GO:BP	GO:0030217	T cell differentiation	0.000680953	TRUE	"The process in which a precursor cell type acquires characteristics of a more mature T-cell. A T cell is a type of lymphocyte whose definin characteristic is the expression of a T cell receptor complex." [GO_REF:0000022, GOC:jid, GOC:mah]	272	1346	41	21118	0.0304606	0.150735	query_1	['GO:0030098', 'GO:0042110']
425	GO:BP	GO:0045668	negative regulation of osteoblast differentiation	0.000690235	TRUE	"Any process that stops, prevents, or reduces the frequency, rate or extent of osteoblast differentiation." [GOC:go_curators]	56	1346	16	21118	0.0118871	0.285714	query_1	['GO:0001649', 'GO:0045596', 'GO:0045667']
426	GO:BP	GO:0022408	negative regulation of cell-cell adhesion	0.000704562	TRUE	"Any process that stops, prevents or reduces the rate or extent of cell adhesion to another cell." [GOC:isa_complete]	186	1346	32	21118	0.0237741	0.172043	query_1	['GO:0007162', 'GO:0022407', 'GO:0098609']
427	GO:BP	GO:0060976	coronary vasculature development	0.000722551	TRUE	"The process whose specific outcome is the progression of the blood vessels of the heart over time, from its formation to the mature structure." [GOC:mtg_heart]	70	1346	18	21118	0.013373	0.257143	query_1	['GO:0001568', 'GO:0007507']
428	GO:BP	GO:0033554	cellular response to stress	0.000751435	TRUE	"Any process that results in a change in state or activity of a cell (in terms of movement, secretion, enzyme production, gene expression, etc.) as a result of a stimulus indicating the organism is under stress. The stress is usually, but not necessarily, exogenous (e.g. temperature, humidity, ionizing radiation)." [GOC:mah]	1805	1346	168	21118	0.124814	0.0930748	query_1	['GO:0006950', 'GO:0051716']
429	GO:BP	GO:0031344	regulation of cell projection organization	0.000754742	TRUE	"Any process that modulates the frequency, rate or extent of a process involved in the formation, arrangement of constituent parts, or disassembly of cell projections." [GOC:mah]	724	1346	82	21118	0.0609212	0.11326	query_1	['GO:0030030', 'GO:0051128']
430	GO:BP	GO:0045860	positive regulation of protein kinase activity	0.000802111	TRUE	"Any process that activates or increases the frequency, rate or extent of protein kinase activity." [GOC:go_curators]	485	1346	61	21118	0.0453195	0.125773	query_1	['GO:0001934', 'GO:0033674', 'GO:0045859']
431	GO:BP	GO:0061572	actin filament bundle organization	0.00082403	TRUE	"A process that results in the assembly, arrangement of constituent parts, or disassembly of an actin filament bundle." [GOC:dph]	169	1346	30	21118	0.0222883	0.177515	query_1	['GO:0007015']
432	GO:BP	GO:0071559	response to transforming growth factor beta	0.000865071	TRUE	"Any process that results in a change in state or activity of a cell or an organism (in terms of movement, secretion, enzyme production, gene expression, etc.) as a result of a transforming growth factor beta stimulus." [GOC:mah]	235	1346	37	21118	0.0274889	0.157447	query_1	['GO:0009719', 'GO:0070848']
433	GO:BP	GO:0001775	cell activation	0.000869445	TRUE	"A change in the morphology or behavior of a cell resulting from exposure to an activating factor such as a cellular or soluble ligand." [GOC:mgi_curators]	1115	1346	114	21118	0.0846954	0.102242	query_1	['GO:0009987']
434	GO:BP	GO:0030036	actin cytoskeleton organization	0.000978086	TRUE	"A process that is carried out at the cellular level which results in the assembly, arrangement of constituent parts, or disassembly of cytoskeletal structures comprising actin filaments and their associated proteins." [GOC:dph, GOC:jl, GOC:mah]	705	1346	80	21118	0.0594354	0.113475	query_1	['GO:0007010', 'GO:0030029']
435	GO:BP	GO:0048844	artery morphogenesis	0.00105382	TRUE	"The process in which the anatomical structures of arterial blood vessels are generated and organized. Arteries are blood vessels that transport blood from the heart to the body and its organs." [GOC:dsf, PMID:16740480]	79	1346	19	21118	0.0141159	0.240506	query_1	['GO:0048514', 'GO:0060840']
436	GO:BP	GO:0008015	blood circulation	0.00105724	TRUE	"The flow of blood through the body of an animal, enabling the transport of nutrients to the tissues and the removal of waste products." [GOC:mtg_heart, ISBN:0192800825]	500	1346	62	21118	0.0460624	0.124	query_1	['GO:0003013']
437	GO:BP	GO:0030278	regulation of ossification	0.00106158	TRUE	"Any process that modulates the frequency, rate or extent of ossification, the formation of bone or of a bony substance or the conversion of fibrous tissue or of cartilage into bone or a bony substance." [GOC:go_curators]	127	1346	25	21118	0.0185736	0.19685	query_1	['GO:0001503', 'GO:0051239']
438	GO:BP	GO:1901861	regulation of muscle tissue development	0.00107707	TRUE	"Any process that modulates the frequency, rate or extent of muscle tissue development." [GOC:TermGenie, GOC:yaf, PMID:23150719]	51	1346	15	21118	0.0111441	0.294118	query_1	['GO:0050793', 'GO:0060537']
439	GO:BP	GO:0060560	developmental growth involved in morphogenesis	0.00111398	TRUE	"The increase in size or mass of an anatomical structure that contributes to the structure attaining its shape." [GOC:dph]	257	1346	39	21118	0.0289747	0.151751	query_1	['GO:0009653', 'GO:0048589']
440	GO:BP	GO:0043588	skin development	0.00111848	TRUE	"The process whose specific outcome is the progression of the skin over time, from its formation to the mature structure. The skin is the external membranous integument of an animal. In vertebrates the skin generally consists of two layers, an outer nonsensitive and nonvascular epidermis (cuticle or skarfskin) composed of cells which are constantly growing and multiplying in the deeper, and being…	277	1346	41	21118	0.0304606	0.148014	query_1	['GO:0048513']
441	GO:BP	GO:0003231	cardiac ventricle development	0.00113864	TRUE	"The process whose specific outcome is the progression of a cardiac ventricle over time, from its formation to the mature structure. A cardiac ventricle receives blood from a cardiac atrium and pumps it out of the heart." [GOC:mtg_heart]	136	1346	26	21118	0.0193165	0.191176	query_1	['GO:0003205']
442	GO:BP	GO:0035148	tube formation	0.00123051	TRUE	"Creation of the central hole of a tube in an anatomical structure through which gases and/or liquids flow." [GOC:bf]	163	1346	29	21118	0.0215453	0.177914	query_1	['GO:0035239', 'GO:0048646']
443	GO:BP	GO:0051962	positive regulation of nervous system development	0.00132246	TRUE	"Any process that activates, maintains or increases the frequency, rate or extent of nervous system development, the origin and formation of nervous tissue." [GOC:ai]	330	1346	46	21118	0.0341753	0.139394	query_1	['GO:0007399', 'GO:0051094', 'GO:0051240', 'GO:0051960']
444	GO:BP	GO:0003007	heart morphogenesis	0.00136439	TRUE	"The developmental process in which the heart is generated and organized. The heart is a hollow, muscular organ, which, by contracting rhythmically, keeps up the circulation of the blood." [GOC:dph, GOC:isa_complete]	259	1346	39	21118	0.0289747	0.150579	query_1	['GO:0007507', 'GO:0009887']
445	GO:BP	GO:0048634	regulation of muscle organ development	0.00142497	TRUE	"Any process that modulates the frequency, rate or extent of muscle development." [GOC:go_curators]	52	1346	15	21118	0.0111441	0.288462	query_1	['GO:0007517', 'GO:0050793']
446	GO:BP	GO:0030858	positive regulation of epithelial cell differentiation	0.00142497	TRUE	"Any process that activates or increases the frequency, rate or extent of epithelial cell differentiation." [GOC:mah]	52	1346	15	21118	0.0111441	0.288462	query_1	['GO:0030855', 'GO:0030856', 'GO:0045597']
447	GO:BP	GO:0006469	negative regulation of protein kinase activity	0.00144024	TRUE	"Any process that stops, prevents, or reduces the frequency, rate or extent of protein kinase activity." [GOC:go_curators]	230	1346	36	21118	0.0267459	0.156522	query_1	['GO:0001933', 'GO:0033673', 'GO:0045859']
448	GO:BP	GO:0060993	kidney morphogenesis	0.00144557	TRUE	"Morphogenesis of a kidney. A kidney is an organ that filters the blood and excretes the end products of body metabolism in the form of urine." [GOC:dph, GOC:mtg_kidney_jan10]	96	1346	21	21118	0.0156018	0.21875	query_1	['GO:0001822', 'GO:0009887']
449	GO:BP	GO:0048645	animal organ formation	0.00150766	TRUE	"The process pertaining to the initial formation of an animal organ from unspecified parts. The process begins with the specific processes that contribute to the appearance of the discrete structure, such as inductive events, and ends when the structural rudiment of the organ is recognizable, such as a condensation of mesenchymal cells into the organ rudiment. Organs are a natural part or structu…	66	1346	17	21118	0.01263	0.257576	query_1	['GO:0009887', 'GO:0048646']
450	GO:BP	GO:0033674	positive regulation of kinase activity	0.00157993	TRUE	"Any process that activates or increases the frequency, rate or extent of kinase activity, the catalysis of the transfer of a phosphate group, usually from ATP, to a substrate molecule." [GOC:mah]	551	1346	66	21118	0.0490342	0.119782	query_1	['GO:0042327', 'GO:0043549', 'GO:0051347']
451	GO:BP	GO:0071560	cellular response to transforming growth factor beta stimulus	0.00160344	TRUE	"Any process that results in a change in state or activity of a cell (in terms of movement, secretion, enzyme production, gene expression, etc.) as a result of a transforming growth factor beta stimulus." [GOC:ecd, PMID:15451575]	231	1346	36	21118	0.0267459	0.155844	query_1	['GO:0071363', 'GO:0071495', 'GO:0071559']
452	GO:BP	GO:0043085	positive regulation of catalytic activity	0.00163108	TRUE	"Any process that activates or increases the activity of an enzyme." [GOC:ebc, GOC:jl, GOC:tb, GOC:vw]	1268	1346	125	21118	0.0928678	0.0985804	query_1	['GO:0044093', 'GO:0050790']
453	GO:BP	GO:0051098	regulation of binding	0.00171074	TRUE	"Any process that modulates the frequency, rate or extent of binding, the selective interaction of a molecule with one or more specific sites on another molecule." [GOC:ai]	386	1346	51	21118	0.03789	0.132124	query_1	['GO:0065009']
454	GO:BP	GO:0006950	response to stress	0.00171462	TRUE	"Any process that results in a change in state or activity of a cell or an organism (in terms of movement, secretion, enzyme production, gene expression, etc.) as a result of a disturbance in organismal or cellular homeostasis, usually, but not necessarily, exogenous (e.g. temperature, humidity, ionizing radiation)." [GOC:mah]	3817	1346	312	21118	0.231798	0.0817396	query_1	['GO:0050896']
455	GO:BP	GO:0042592	homeostatic process	0.00174262	TRUE	"Any biological process involved in the maintenance of an internal steady state." [GOC:jl, ISBN:0395825172]	1922	1346	175	21118	0.130015	0.091051	query_1	['GO:0065008']
456	GO:BP	GO:0022604	regulation of cell morphogenesis	0.00178318	TRUE	"Any process that modulates the frequency, rate or extent of cell morphogenesis. Cell morphogenesis is the developmental process in which the shape of a cell is generated and organized." [GOC:isa_complete]	323	1346	45	21118	0.0334324	0.139319	query_1	['GO:0000902', 'GO:0022603']
457	GO:BP	GO:0043524	negative regulation of neuron apoptotic process	0.00202728	TRUE	"Any process that stops, prevents, or reduces the frequency, rate or extent of cell death by apoptotic process in neurons." [GOC:go_curators, GOC:mtg_apoptosis]	176	1346	30	21118	0.0222883	0.170455	query_1	['GO:0043066', 'GO:0043523', 'GO:0051402', 'GO:1901215']
458	GO:BP	GO:0033673	negative regulation of kinase activity	0.0020308	TRUE	"Any process that stops, prevents, or reduces the frequency, rate or extent of kinase activity, the catalysis of the transfer of a phosphate group, usually from ATP, to a substrate molecule." [GOC:mah]	253	1346	38	21118	0.0282318	0.150198	query_1	['GO:0042326', 'GO:0043549', 'GO:0051348']
459	GO:BP	GO:0048704	embryonic skeletal system morphogenesis	0.00207744	TRUE	"The process in which the anatomical structures of the skeleton are generated and organized during the embryonic phase." [GOC:dph, GOC:dsf, GOC:jid, GOC:tb, PMID:16049113]	98	1346	21	21118	0.0156018	0.214286	query_1	['GO:0048562', 'GO:0048705', 'GO:0048706']
460	GO:BP	GO:0043542	endothelial cell migration	0.0021514	TRUE	"The orderly movement of an endothelial cell into the extracellular matrix to form an endothelium." [GOC:go_curators]	224	1346	35	21118	0.026003	0.15625	query_1	['GO:0010631']
461	GO:BP	GO:0050767	regulation of neurogenesis	0.00223272	TRUE	"Any process that modulates the frequency, rate or extent of neurogenesis, the generation of cells in the nervous system." [GOC:ai]	422	1346	54	21118	0.0401189	0.127962	query_1	['GO:0022008', 'GO:0048699', 'GO:0051960', 'GO:0060284']
462	GO:BP	GO:0072009	nephron epithelium development	0.00229077	TRUE	"The process whose specific outcome is the progression of the nephron epithelium over time, from its formation to the mature structure. An epithelium is a tissue that covers the internal or external surfaces of an anatomical structure. The nephron epithelium is a tissue that covers the surface of a nephron." [GOC:mtg_kidney_jan10]	115	1346	23	21118	0.0170877	0.2	query_1	['GO:0072006', 'GO:0072073']
463	GO:BP	GO:0051348	negative regulation of transferase activity	0.00239606	TRUE	"Any process that stops or reduces the rate of transferase activity, the catalysis of the transfer of a group, e.g. a methyl group, glycosyl group, acyl group, phosphorus-containing, or other groups, from a donor compound to an acceptor." [GOC:ai]	285	1346	41	21118	0.0304606	0.14386	query_1	['GO:0043086', 'GO:0051338']
464	GO:BP	GO:0007517	muscle organ development	0.00252071	TRUE	"The process whose specific outcome is the progression of the muscle over time, from its formation to the mature structure. The muscle is an organ consisting of a tissue made up of various elongated cells that are specialized to contract and thus to produce movement and mechanical work." [GOC:jid, ISBN:0198506732]	327	1346	45	21118	0.0334324	0.137615	query_1	['GO:0048513', 'GO:0061061']
465	GO:BP	GO:0048732	gland development	0.00256081	TRUE	"The process whose specific outcome is the progression of a gland over time, from its formation to the mature structure. A gland is an organ specialised for secretion." [GOC:jid]	513	1346	62	21118	0.0460624	0.120858	query_1	['GO:0048513']
466	GO:BP	GO:0051347	positive regulation of transferase activity	0.00258079	TRUE	"Any process that activates or increases the frequency, rate or extent of transferase activity, the catalysis of the transfer of a group, e.g. a methyl group, glycosyl group, acyl group, phosphorus-containing, or other groups, from a donor compound to an acceptor." [GOC:ai]	628	1346	72	21118	0.0534918	0.11465	query_1	['GO:0043085', 'GO:0051338']
467	GO:BP	GO:0050896	response to stimulus	0.00277612	TRUE	"Any process that results in a change in state or activity of a cell or an organism (in terms of movement, secretion, enzyme production, gene expression, etc.) as a result of a stimulus. The process begins with detection of the stimulus and ends with a change in state or activity or the cell or organism." [GOC:ai, GOC:bf]	9950	1346	719	21118	0.534175	0.0722613	query_1	['GO:0008150']
468	GO:BP	GO:0016202	regulation of striated muscle tissue development	0.00294004	TRUE	"Any process that modulates the frequency, rate or extent of striated muscle development." [GOC:go_curators]	48	1346	14	21118	0.0104012	0.291667	query_1	['GO:0014706', 'GO:0048634', 'GO:1901861']
469	GO:BP	GO:0032835	glomerulus development	0.00297889	TRUE	"The progression of the glomerulus over time from its initial formation until its mature state. The glomerulus is a capillary tuft which forms a close network with the visceral epithelium (podocytes) and the mesangium to form the filtration barrier and is surrounded by Bowman's capsule in nephrons of the vertebrate kidney. The glomerulus is part of the nephron and is restricted to one body segmen…	69	1346	17	21118	0.01263	0.246377	query_1	['GO:0048856', 'GO:0072006']
470	GO:BP	GO:0090257	regulation of muscle system process	0.00298943	TRUE	"Any process that modulates the frequency, rate or extent of a muscle system process, a multicellular organismal process carried out by any of the organs or tissues in a muscle system." [GOC:dph, GOC:tb]	267	1346	39	21118	0.0289747	0.146067	query_1	['GO:0003012', 'GO:0044057']
471	GO:BP	GO:0001704	formation of primary germ layer	0.00314539	TRUE	"The formation of the ectoderm, mesoderm and endoderm during gastrulation." [GOC:go_curators]	117	1346	23	21118	0.0170877	0.196581	query_1	['GO:0007369', 'GO:0048646']
472	GO:BP	GO:0060393	regulation of pathway-restricted SMAD protein phosphorylation	0.0031492	TRUE	"Any process that modulates the rate, frequency or extent of pathway-restricted SMAD protein phosphorylation. Pathway-restricted SMAD proteins and common-partner SMAD proteins are involved in the transforming growth factor beta receptor signaling pathways." [GOC:BHF, GOC:dph, GOC:tb]	62	1346	16	21118	0.0118871	0.258065	query_1	['GO:0001932', 'GO:0060389']
473	GO:BP	GO:0045682	regulation of epidermis development	0.0031492	TRUE	"Any process that modulates the frequency, rate or extent of epidermis development." [GOC:go_curators]	62	1346	16	21118	0.0118871	0.258065	query_1	['GO:0008544', 'GO:0050793']
474	GO:BP	GO:0001701	in utero embryonic development	0.00325095	TRUE	"The process whose specific outcome is the progression of the embryo in the uterus over time, from formation of the zygote in the oviduct, to birth. An example of this process is found in Mus musculus." [GOC:go_curators, GOC:mtg_sensu]	494	1346	60	21118	0.0445765	0.121457	query_1	['GO:0043009']
475	GO:BP	GO:0051145	smooth muscle cell differentiation	0.00332541	TRUE	"The process in which a relatively unspecialized cell acquires specialized features of a smooth muscle cell; smooth muscle lacks transverse striations in its constituent fibers and are almost always involuntary." [CL:0000192, GOC:ai]	77	1346	18	21118	0.013373	0.233766	query_1	['GO:0042692']
476	GO:BP	GO:0003012	muscle system process	0.00345469	TRUE	"A organ system process carried out at the level of a muscle. Muscle tissue is composed of contractile cells or fibers." [GOC:mtg_cardio]	439	1346	55	21118	0.0408618	0.125285	query_1	['GO:0003008']
477	GO:BP	GO:0031589	cell-substrate adhesion	0.00346753	TRUE	"The attachment of a cell to the underlying substrate via adhesion molecules." [GOC:mah, GOC:pf]	352	1346	47	21118	0.0349183	0.133523	query_1	['GO:0007155']
478	GO:BP	GO:0007610	behavior	0.00352508	TRUE	"The internally coordinated responses (actions or inactions) of animals (individuals or groups) to internal or external stimuli, via a mechanism that involves nervous system activity." [GOC:ems, GOC:jl, ISBN:0395448956, PMID:20160973]	716	1346	79	21118	0.0586924	0.110335	query_1	['GO:0008150']
479	GO:BP	GO:0098773	skin epidermis development	0.00356956	TRUE	"The process whose specific outcome is the progression of the skin epidermis over time, from its formation to the mature structure." [GOC:dos]	93	1346	20	21118	0.0148588	0.215054	query_1	['GO:0008544', 'GO:0043588', 'GO:0060429']
480	GO:BP	GO:0032496	response to lipopolysaccharide	0.00361762	TRUE	"Any process that results in a change in state or activity of an organism (in terms of movement, secretion, enzyme production, gene expression, etc.) as a result of a lipopolysaccharide stimulus; lipopolysaccharide is a major component of the cell wall of gram-negative bacteria." [GOC:add, ISBN:0721601464]	374	1346	49	21118	0.0364042	0.131016	query_1	['GO:0002237', 'GO:0033993', 'GO:1901700']
481	GO:BP	GO:0050866	negative regulation of cell activation	0.00387009	TRUE	"Any process that stops, prevents, or reduces the frequency, rate or extent of cell activation." [GOC:ai]	210	1346	33	21118	0.0245171	0.157143	query_1	['GO:0001775', 'GO:0048523', 'GO:0050865']
482	GO:BP	GO:0048660	regulation of smooth muscle cell proliferation	0.0038849	TRUE	"Any process that modulates the frequency, rate or extent of smooth muscle cell proliferation." [CL:0000192, GOC:ebc]	172	1346	29	21118	0.0215453	0.168605	query_1	['GO:0042127', 'GO:0048659']
483	GO:BP	GO:0048738	cardiac muscle tissue development	0.00406454	TRUE	"The process whose specific outcome is the progression of cardiac muscle over time, from its formation to the mature structure." [GOC:dph, GOC:jid, GOC:lm]	250	1346	37	21118	0.0274889	0.148	query_1	['GO:0007507', 'GO:0014706']
484	GO:BP	GO:0071385	cellular response to glucocorticoid stimulus	0.00458155	TRUE	"Any process that results in a change in state or activity of a cell (in terms of movement, secretion, enzyme production, gene expression, etc.) as a result of a glucocorticoid stimulus. Glucocorticoids are hormonal C21 corticosteroids synthesized from cholesterol with the ability to bind with the cortisol receptor and trigger similar effects. Glucocorticoids act primarily on carbohydrate and pro…	71	1346	17	21118	0.01263	0.239437	query_1	['GO:0051384', 'GO:0071384']
485	GO:BP	GO:0048565	digestive tract development	0.00464683	TRUE	"The process whose specific outcome is the progression of the digestive tract over time, from its formation to the mature structure. The digestive tract is the anatomical structure through which food passes and is processed." [GOC:go_curators]	137	1346	25	21118	0.0185736	0.182482	query_1	['GO:0035295', 'GO:0055123']
486	GO:BP	GO:0051050	positive regulation of transport	0.00521121	TRUE	"Any process that activates or increases the frequency, rate or extent of the directed movement of substances (such as macromolecules, small molecules, ions) into, out of or within a cell, or between cells, by means of some agent such as a transporter or pore." [GOC:ai]	1005	1346	102	21118	0.0757801	0.101493	query_1	['GO:0006810', 'GO:0048518', 'GO:0051049']
487	GO:BP	GO:0002237	response to molecule of bacterial origin	0.0053554	TRUE	"Any process that results in a change in state or activity of an organism (in terms of movement, secretion, enzyme production, gene expression, etc.) as a result of a stimulus by molecules of bacterial origin such as peptides derived from bacterial flagellin." [GOC:rl, GOC:sm]	390	1346	50	21118	0.0371471	0.128205	query_1	['GO:0009617', 'GO:0010033', 'GO:0043207']
488	GO:BP	GO:0042110	T cell activation	0.00550625	TRUE	"The change in morphology and behavior of a mature or immature T cell resulting from exposure to a mitogen, cytokine, chemokine, cellular ligand, or an antigen for which it is specific." [GOC:mgi_curators, ISBN:0781735149]	502	1346	60	21118	0.0445765	0.119522	query_1	['GO:0046649']
489	GO:BP	GO:0044085	cellular component biogenesis	0.00553922	TRUE	"A process that results in the biosynthesis of constituent macromolecules, assembly, and arrangement of constituent parts of a cellular component. Includes biosynthesis of constituent macromolecules, and those macromolecular modifications that are involved in synthesis or assembly of the cellular component." [GOC:jl, GOC:mah]	2974	1346	249	21118	0.184993	0.0837256	query_1	['GO:0071840']
490	GO:BP	GO:0022402	cell cycle process	0.00561047	TRUE	"The cellular process that ensures successive accurate and complete genome replication and chromosome segregation." [GOC:isa_complete, GOC:mtg_cell_cycle]	1082	1346	108	21118	0.0802377	0.0998152	query_1	['GO:0007049', 'GO:0009987']
491	GO:BP	GO:1903706	regulation of hemopoiesis	0.00573332	TRUE	"Any process that modulates the frequency, rate or extent of hemopoiesis." [GO_REF:0000058, GOC:pad, GOC:PARL, GOC:TermGenie, PMID:20080761]	380	1346	49	21118	0.0364042	0.128947	query_1	['GO:0002682', 'GO:0030097', 'GO:2000026']
492	GO:BP	GO:0034968	histone lysine methylation	0.00578681	TRUE	"The modification of a histone by addition of one or more methyl groups to a lysine residue." [GOC:mah, GOC:pr]	121	1346	23	21118	0.0170877	0.190083	query_1	['GO:0016571', 'GO:0018022']
493	GO:BP	GO:0007568	aging	0.00579176	TRUE	"A developmental process that is a deterioration and loss of function over time. Aging includes loss of functions such as resistance to disease, homeostasis, and fertility, as well as wear and tear. Aging includes cellular senescence, but is more inclusive. May precede death and may succeed developmental maturation (GO:0021700)." [GOC:PO_curators]	337	1346	45	21118	0.0334324	0.133531	query_1	['GO:0032502']
494	GO:BP	GO:0072028	nephron morphogenesis	0.00601888	TRUE	"The process in which the anatomical structures of the nephron are generated and organized. A nephron is the functional unit of the kidney." [GOC:mtg_kidney_jan10]	80	1346	18	21118	0.013373	0.225	query_1	['GO:0009653', 'GO:0060993', 'GO:0072006']
495	GO:BP	GO:0043583	ear development	0.00605543	TRUE	"The process whose specific outcome is the progression of the ear over time, from its formation to the mature structure. The ear is the sense organ in vertebrates that is specialized for the detection of sound, and the maintenance of balance. Includes the outer ear and middle ear, which collect and transmit sound waves; and the inner ear, which contains the organs of balance and (except in fish) …	234	1346	35	21118	0.026003	0.149573	query_1	['GO:0007423']
496	GO:BP	GO:0060389	pathway-restricted SMAD protein phosphorylation	0.00622645	TRUE	"The process of introducing a phosphate group on to a pathway restricted SMAD protein. A pathway restricted SMAD protein is an effector protein that acts directly downstream of the transforming growth factor family receptor." [GOC:dph, ISBN:3527303782]	65	1346	16	21118	0.0118871	0.246154	query_1	['GO:0006468', 'GO:0007178']
497	GO:BP	GO:0001569	branching involved in blood vessel morphogenesis	0.00681141	TRUE	"The process of coordinated growth and sprouting of blood vessels giving rise to the organized vascular system." [GOC:dph]	38	1346	12	21118	0.0089153	0.315789	query_1	['GO:0001525', 'GO:0048754']
498	GO:BP	GO:0061323	cell proliferation involved in heart morphogenesis	0.00685025	TRUE	"The multiplication or reproduction of cells, resulting in the expansion of a cell population that contributes to the shaping of the heart." [GOC:dph, GOC:mtg_heart]	21	1346	9	21118	0.00668648	0.428571	query_1	['GO:0003007', 'GO:0008283']
499	GO:BP	GO:0071901	negative regulation of protein serine/threonine kinase activity	0.00692723	TRUE	"Any process that decreases the rate, frequency, or extent of protein serine/threonine kinase activity." [GOC:BHF, GOC:mah]	131	1346	24	21118	0.0178306	0.183206	query_1	['GO:0006469', 'GO:0071900']
500	GO:BP	GO:0071902	positive regulation of protein serine/threonine kinase activity	0.00700832	TRUE	"Any process that increases the rate, frequency, or extent of protein serine/threonine kinase activity." [GOC:mah]	297	1346	41	21118	0.0304606	0.138047	query_1	['GO:0045860', 'GO:0071900']
501	GO:BP	GO:0048659	smooth muscle cell proliferation	0.00705863	TRUE	"The multiplication or reproduction of smooth muscle cells, resulting in the expansion of a cell population." [CL:0000192, GOC:ebc, PMID:1840698]	177	1346	29	21118	0.0215453	0.163842	query_1	['GO:0033002']
502	GO:BP	GO:0048839	inner ear development	0.00717023	TRUE	"The process whose specific outcome is the progression of the inner ear over time, from its formation to the mature structure." [GOC:sr]	206	1346	32	21118	0.0237741	0.15534	query_1	['GO:0043583', 'GO:0048856']
503	GO:BP	GO:0001942	hair follicle development	0.00733955	TRUE	"The process whose specific outcome is the progression of the hair follicle over time, from its formation to the mature structure. A hair follicle is a tube-like opening in the epidermis where the hair shaft develops and into which the sebaceous glands open." [GOC:dph, UBERON:0002073]	89	1346	19	21118	0.0141159	0.213483	query_1	['GO:0022405', 'GO:0048856', 'GO:0098773']
504	GO:BP	GO:0045598	regulation of fat cell differentiation	0.00913663	TRUE	"Any process that modulates the frequency, rate or extent of adipocyte differentiation." [GOC:go_curators]	142	1346	25	21118	0.0185736	0.176056	query_1	['GO:0045444', 'GO:0045595']
505	GO:BP	GO:0060675	ureteric bud morphogenesis	0.00956714	TRUE	"The process in which the ureteric bud is generated and organized." [GOC:dph, GOC:mtg_kidney_jan10]	67	1346	16	21118	0.0118871	0.238806	query_1	['GO:0001657', 'GO:0072171']
506	GO:BP	GO:0009605	response to external stimulus	0.0097629	TRUE	"Any process that results in a change in state or activity of a cell or an organism (in terms of movement, secretion, enzyme production, gene expression, etc.) as a result of an external stimulus." [GOC:hb]	2912	1346	243	21118	0.180535	0.0834478	query_1	['GO:0050896']
507	GO:BP	GO:0035115	embryonic forelimb morphogenesis	0.00986266	TRUE	"The process, occurring in the embryo, by which the anatomical structures of the forelimb are generated and organized. The forelimbs are the front limbs of an animal, e.g. the arms of a human." [ISBN:0198612001]	33	1346	11	21118	0.00817236	0.333333	query_1	['GO:0030326', 'GO:0035136']
508	GO:BP	GO:0055123	digestive system development	0.0101946	TRUE	"The process whose specific outcome is the progression of the digestive system over time, from its formation to the mature structure. The digestive system is the entire structure in which digestion takes place. Digestion is all of the physical, chemical, and biochemical processes carried out by multicellular organisms to break down ingested nutrients into components that may be easily absorbed an…	152	1346	26	21118	0.0193165	0.171053	query_1	['GO:0048731']
509	GO:BP	GO:0008630	intrinsic apoptotic signaling pathway in response to DNA damage	0.0109043	TRUE	"A series of molecular signals in which an intracellular signal is conveyed to trigger the apoptotic death of a cell. The pathway is induced by the detection of DNA damage, and ends when the execution phase of apoptosis is triggered." [GOC:go_curators, GOC:mtg_apoptosis]	108	1346	21	21118	0.0156018	0.194444	query_1	['GO:0006974', 'GO:0097193']
510	GO:BP	GO:0021915	neural tube development	0.0111584	TRUE	"The process whose specific outcome is the progression of the neural tube over time, from its formation to the mature structure. The mature structure of the neural tube exists when the tube has been segmented into the forebrain, midbrain, hindbrain and spinal cord regions. In addition neural crest has budded away from the epithelium." [GO_REF:0000021, GOC:cls, GOC:dgh, GOC:dph, GOC:jid]	181	1346	29	21118	0.0215453	0.160221	query_1	['GO:0007399', 'GO:0035295', 'GO:0043009', 'GO:0060429']
511	GO:BP	GO:0072171	mesonephric tubule morphogenesis	0.0117769	TRUE	"The process in which the anatomical structures of a mesonephric tubule are generated and organized. A mesonephric tubule is an epithelial tube that is part of the mesonephros." [GOC:mtg_kidney_jan10]	68	1346	16	21118	0.0118871	0.235294	query_1	['GO:0072078', 'GO:0072164']
512	GO:BP	GO:0022612	gland morphogenesis	0.0118481	TRUE	"The process in which the anatomical structures of a gland are generated and organized." [GOC:isa_complete]	144	1346	25	21118	0.0185736	0.173611	query_1	['GO:0009887', 'GO:0048732']
513	GO:BP	GO:0098609	cell-cell adhesion	0.0121094	TRUE	"The attachment of one cell to another cell via adhesion molecules." [GOC:dos]	825	1346	86	21118	0.063893	0.104242	query_1	['GO:0007155']
514	GO:BP	GO:0022404	molting cycle process	0.012344	TRUE	"A multicellular organismal process involved in the periodic casting off and regeneration of an outer covering of cuticle, feathers, hair, horns, skin." [GOC:isa_complete]	92	1346	19	21118	0.0141159	0.206522	query_1	['GO:0032501', 'GO:0042303']
515	GO:BP	GO:0022405	hair cycle process	0.012344	TRUE	"A multicellular organismal process involved in the cyclical phases of growth (anagen), regression (catagen), quiescence (telogen), and shedding (exogen) in the life of a hair; one of the collection or mass of filaments growing from the skin of an animal, and forming a covering for a part of the head or for any part or the whole of the body." [GOC:isa_complete]	92	1346	19	21118	0.0141159	0.206522	query_1	['GO:0022404', 'GO:0042633']
516	GO:BP	GO:0071384	cellular response to corticosteroid stimulus	0.0124842	TRUE	"Any process that results in a change in state or activity of a cell (in terms of movement, secretion, enzyme production, gene expression, etc.) as a result of a corticosteroid hormone stimulus. A corticosteroid is a steroid hormone that is produced in the adrenal cortex. Corticosteroids are involved in a wide range of physiologic systems such as stress response, immune response and regulation of…	76	1346	17	21118	0.01263	0.223684	query_1	['GO:0031960', 'GO:0071383']
517	GO:BP	GO:0003151	outflow tract morphogenesis	0.0124842	TRUE	"The process in which the anatomical structures of the outflow tract are generated and organized. The outflow tract is the portion of the heart through which blood flows into the arteries." [GOC:mtg_heart, UBERON:0004145]	76	1346	17	21118	0.01263	0.223684	query_1	['GO:0003007', 'GO:0009653']
518	GO:BP	GO:0050769	positive regulation of neurogenesis	0.0132379	TRUE	"Any process that activates or increases the frequency, rate or extent of neurogenesis, the generation of cells within the nervous system." [GOC:ai]	273	1346	38	21118	0.0282318	0.139194	query_1	['GO:0010720', 'GO:0022008', 'GO:0050767', 'GO:0051962']
519	GO:BP	GO:0072012	glomerulus vasculature development	0.013513	TRUE	"The biological process whose specific outcome is the progression of a glomerulus vasculature from an initial condition to its mature state. This process begins with the formation of the glomerulus vasculature and ends with the mature structure. The glomerulus vasculature is composed of the tubule structures that carry blood or lymph in the glomerulus." [GOC:mtg_kidney_jan10]	28	1346	10	21118	0.00742942	0.357143	query_1	['GO:0001568', 'GO:0032835', 'GO:0061440']
520	GO:BP	GO:0030099	myeloid cell differentiation	0.013715	TRUE	"The process in which a relatively unspecialized myeloid precursor cell acquires the specialized features of any cell of the myeloid leukocyte, megakaryocyte, thrombocyte, or erythrocyte lineages." [GOC:add, ISBN:0781735149]	403	1346	50	21118	0.0371471	0.124069	query_1	['GO:0030097', 'GO:0030154']
521	GO:BP	GO:0009611	response to wounding	0.0141244	TRUE	"Any process that results in a change in state or activity of a cell or an organism (in terms of movement, secretion, enzyme production, gene expression, etc.) as a result of a stimulus indicating damage to the organism." [GOC:go_curators]	517	1346	60	21118	0.0445765	0.116054	query_1	['GO:0006950']
522	GO:BP	GO:0001707	mesoderm formation	0.0144329	TRUE	"The process that gives rise to the mesoderm. This process pertains to the initial formation of the structure from unspecified parts." [GOC:go_curators]	69	1346	16	21118	0.0118871	0.231884	query_1	['GO:0001704', 'GO:0048332']
523	GO:BP	GO:0030323	respiratory tube development	0.0147948	TRUE	"The process whose specific outcome is the progression of the respiratory tube over time, from its formation to the mature structure. The respiratory tube is assumed to mean any tube in the respiratory tract." [GOC:jid]	213	1346	32	21118	0.0237741	0.150235	query_1	['GO:0035295', 'GO:0048513']
524	GO:BP	GO:0007010	cytoskeleton organization	0.0150423	TRUE	"A process that is carried out at the cellular level which results in the assembly, arrangement of constituent parts, or disassembly of cytoskeletal structures." [GOC:dph, GOC:jl, GOC:mah]	1390	1346	130	21118	0.0965825	0.0935252	query_1	['GO:0006996']
525	GO:BP	GO:0042770	signal transduction in response to DNA damage	0.0152761	TRUE	"A cascade of processes induced by the detection of DNA damage within a cell." [GOC:go_curators]	146	1346	25	21118	0.0185736	0.171233	query_1	['GO:0006974', 'GO:0035556']
526	GO:BP	GO:0031960	response to corticosteroid	0.0159995	TRUE	"Any process that results in a change in state or activity of a cell or an organism (in terms of movement, secretion, enzyme production, gene expression, etc.) as a result of a corticosteroid hormone stimulus. A corticosteroid is a steroid hormone that is produced in the adrenal cortex. Corticosteroids are involved in a wide range of physiologic systems such as stress response, immune response an…	194	1346	30	21118	0.0222883	0.154639	query_1	['GO:0048545']
527	GO:BP	GO:0048145	regulation of fibroblast proliferation	0.0161043	TRUE	"Any process that modulates the frequency, rate or extent of multiplication or reproduction of fibroblast cells." [GOC:jid]	102	1346	20	21118	0.0148588	0.196078	query_1	['GO:0042127', 'GO:0048144']
528	GO:BP	GO:0000278	mitotic cell cycle	0.016322	TRUE	"Progression through the phases of the mitotic cell cycle, the most common eukaryotic cell cycle, which canonically comprises four successive phases called G1, S, G2, and M and includes replication of the genome and the subsequent segregation of chromosomes into daughter cells. In some variant cell cycles nuclear replication or nuclear division may not be followed by cell division, or G1 and G2 p…	819	1346	85	21118	0.0631501	0.103785	query_1	['GO:0007049']
529	GO:BP	GO:0035136	forelimb morphogenesis	0.0166227	TRUE	"The process in which the anatomical structures of the forelimb are generated and organized. The forelimbs are the front limbs of an animal, e.g. the arms of a human." [GOC:go_curators]	41	1346	12	21118	0.0089153	0.292683	query_1	['GO:0035108']
530	GO:BP	GO:0060021	roof of mouth development	0.0172141	TRUE	"The biological process whose specific outcome is the progression of the roof of the mouth from an initial condition to its mature state. This process begins with the formation of the structure and ends with the mature structure. The roof of the mouth is the partition that separates the nasal and oral cavities." [GOC:dph, ISBN:0721662544]	94	1346	19	21118	0.0141159	0.202128	query_1	['GO:0048856']
531	GO:BP	GO:2001235	positive regulation of apoptotic signaling pathway	0.0173093	TRUE	"Any process that activates or increases the frequency, rate or extent of apoptotic signaling pathway." [GOC:mtg_apoptosis]	147	1346	25	21118	0.0185736	0.170068	query_1	['GO:0009967', 'GO:0043065', 'GO:0097190', 'GO:2001233']
532	GO:BP	GO:0045604	regulation of epidermal cell differentiation	0.0174269	TRUE	"Any process that modulates the frequency, rate or extent of epidermal cell differentiation." [GOC:go_curators]	55	1346	14	21118	0.0104012	0.254545	query_1	['GO:0009913', 'GO:0030856', 'GO:0045682']
533	GO:BP	GO:0055007	cardiac muscle cell differentiation	0.0177466	TRUE	"The process in which a cardiac muscle precursor cell acquires specialized features of a cardiac muscle cell. Cardiac muscle cells are striated muscle cells that are responsible for heart contraction." [GOC:devbiol, GOC:mtg_heart]	138	1346	24	21118	0.0178306	0.173913	query_1	['GO:0035051', 'GO:0048738', 'GO:0051146']
534	GO:BP	GO:0035270	endocrine system development	0.0177466	TRUE	"Progression of the endocrine system over time, from its formation to a mature structure. The endocrine system is a system of hormones and ductless glands, where the glands release hormones directly into the blood, lymph or other intercellular fluid, and the hormones circulate within the body to affect distant organs. The major glands that make up the human endocrine system are the hypothalamus, …	138	1346	24	21118	0.0178306	0.173913	query_1	['GO:0048731']
535	GO:BP	GO:0022407	regulation of cell-cell adhesion	0.0178366	TRUE	"Any process that modulates the frequency, rate or extent of attachment of a cell to another cell." [GOC:isa_complete]	418	1346	51	21118	0.03789	0.12201	query_1	['GO:0030155', 'GO:0098609']
536	GO:BP	GO:0008203	cholesterol metabolic process	0.0179062	TRUE	"The chemical reactions and pathways involving cholesterol, cholest-5-en-3 beta-ol, the principal sterol of vertebrates and the precursor of many steroids, including bile acids and steroid hormones. It is a component of the plasma membrane lipid bilayer and of plasma lipoproteins and can be found in all animal tissues." [ISBN:0198506732]	129	1346	23	21118	0.0170877	0.178295	query_1	['GO:0016125', 'GO:1902652']
537	GO:BP	GO:0050679	positive regulation of epithelial cell proliferation	0.0180077	TRUE	"Any process that activates or increases the rate or extent of epithelial cell proliferation." [GOC:ai]	205	1346	31	21118	0.0230312	0.15122	query_1	['GO:0008284', 'GO:0050673', 'GO:0050678']
538	GO:BP	GO:0140352	export from cell	0.0180207	TRUE	"The directed movement of some substance from a cell, into the extracellular region. This may occur via transport across the plasma membrane or via exocytosis." [GOC:pg]	908	1346	92	21118	0.0683507	0.101322	query_1	['GO:0006810', 'GO:0009987']
539	GO:BP	GO:0061333	renal tubule morphogenesis	0.0181479	TRUE	"The process in which the renal tubule is generated by specification of cell fate, through the maintenance of cell polarity, regulated cell proliferation and morphogenetic cell rearrangements, shape changes and growth. A renal tubule is a tube that filters, re-absorbs and secretes substances to rid an organism of waste and to play a role in fluid homeostasis." [GOC:dph, GOC:mtg_kidney_jan10]	78	1346	17	21118	0.01263	0.217949	query_1	['GO:0060562', 'GO:0061326']
540	GO:BP	GO:0051384	response to glucocorticoid	0.0186804	TRUE	"Any process that results in a change in state or activity of a cell or an organism (in terms of movement, secretion, enzyme production, gene expression, etc.) as a result of a glucocorticoid stimulus. Glucocorticoids are hormonal C21 corticosteroids synthesized from cholesterol with the ability to bind with the cortisol receptor and trigger similar effects. Glucocorticoids act primarily on carbo…	176	1346	28	21118	0.0208024	0.159091	query_1	['GO:0031960']
541	GO:BP	GO:0033280	response to vitamin D	0.0188903	TRUE	"Any process that results in a change in state or activity of a cell or an organism (in terms of movement, secretion, enzyme production, gene expression, etc.) as a result of a vitamin D stimulus." [GOC:sl]	35	1346	11	21118	0.00817236	0.314286	query_1	['GO:0014070', 'GO:0033273', 'GO:0033993', 'GO:1901700']
542	GO:BP	GO:0032940	secretion by cell	0.0195455	TRUE	"The controlled release of a substance by a cell." [GOC:mah]	860	1346	88	21118	0.0653789	0.102326	query_1	['GO:0046903', 'GO:0140352']
543	GO:BP	GO:0061035	regulation of cartilage development	0.0214029	TRUE	"Any process that modulates the rate, frequency, or extent of cartilage development, the process whose specific outcome is the progression of the cartilage over time, from its formation to the mature structure. Cartilage is a connective tissue dominated by extracellular matrix containing collagen type II and large amounts of proteoglycan, particularly chondroitin sulfate." [GOC:dph]	71	1346	16	21118	0.0118871	0.225352	query_1	['GO:0051216', 'GO:2000026']
544	GO:BP	GO:0048144	fibroblast proliferation	0.0219017	TRUE	"The multiplication or reproduction of fibroblast cells, resulting in the expansion of the fibroblast population." [GOC:jid]	104	1346	20	21118	0.0148588	0.192308	query_1	['GO:0008283']
545	GO:BP	GO:0071774	response to fibroblast growth factor	0.0219017	TRUE	"Any process that results in a change in state or activity of a cell or an organism (in terms of movement, secretion, enzyme production, gene expression, etc.) as a result of a fibroblast growth factor stimulus." [GOC:mah]	104	1346	20	21118	0.0148588	0.192308	query_1	['GO:0009719', 'GO:0070848']
546	GO:BP	GO:0044089	positive regulation of cellular component biogenesis	0.0219187	TRUE	"Any process that activates or increases the frequency, rate or extent of cellular component biogenesis, a process that results in the biosynthesis of constituent macromolecules, assembly, and arrangement of constituent parts of a cellular component." [GOC:jl]	536	1346	61	21118	0.0453195	0.113806	query_1	['GO:0044085', 'GO:0044087', 'GO:0048522']
547	GO:BP	GO:0006066	alcohol metabolic process	0.0230726	TRUE	"The chemical reactions and pathways involving alcohols, any of a class of compounds containing one or more hydroxyl groups attached to a saturated carbon atom." [ISBN:0198506732]	344	1346	44	21118	0.0326895	0.127907	query_1	['GO:0044281', 'GO:1901615']
548	GO:BP	GO:0010632	regulation of epithelial cell migration	0.0234056	TRUE	"Any process that modulates the frequency, rate or extent of epithelial cell migration." [GOC:BHF, GOC:dph, GOC:tb]	238	1346	34	21118	0.02526	0.142857	query_1	['GO:0010631', 'GO:0030334', 'GO:0051239']
549	GO:BP	GO:0060541	respiratory system development	0.0234056	TRUE	"The progression of the respiratory system over time from its formation to its mature structure. The respiratory system carries out respiratory gaseous exchange." [GOC:dph]	238	1346	34	21118	0.02526	0.142857	query_1	['GO:0048731']
550	GO:BP	GO:0021953	central nervous system neuron differentiation	0.024341	TRUE	"The process in which a relatively unspecialized cell acquires specialized features of a neuron whose cell body resides in the central nervous system." [GO_REF:0000021, GOC:cls, GOC:dgh, GOC:dph, GOC:jid]	208	1346	31	21118	0.0230312	0.149038	query_1	['GO:0007417', 'GO:0030182']
551	GO:BP	GO:0048872	homeostasis of number of cells	0.0244528	TRUE	"Any biological process involved in the maintenance of the steady-state number of cells within a population of cells." [GOC:isa_complete]	323	1346	42	21118	0.0312036	0.130031	query_1	['GO:0042592']
552	GO:BP	GO:0060425	lung morphogenesis	0.0245992	TRUE	"The process in which the anatomical structures of the lung are generated and organized." [GOC:dph]	64	1346	15	21118	0.0111441	0.234375	query_1	['GO:0009887', 'GO:0030324']
553	GO:BP	GO:0048332	mesoderm morphogenesis	0.0259053	TRUE	"The process in which the anatomical structures of the mesoderm are generated and organized." [GOC:go_curators]	72	1346	16	21118	0.0118871	0.222222	query_1	['GO:0007498', 'GO:0048729']
554	GO:BP	GO:1902652	secondary alcohol metabolic process	0.0259529	TRUE	"The chemical reactions and pathways involving secondary alcohol." [GO_REF:0000068, GOC:mengo_curators, GOC:TermGenie, PMID:11288200]	141	1346	24	21118	0.0178306	0.170213	query_1	['GO:0006066']
555	GO:BP	GO:0090100	positive regulation of transmembrane receptor protein serine/threonine kinase signaling pathway	0.0264413	TRUE	"Any process that increases the rate, frequency, or extent of the series of molecular signals generated as a consequence of a transmembrane receptor serine/threonine kinase binding to its physiological ligand." [GOC:dph, GOC:tb]	114	1346	21	21118	0.0156018	0.184211	query_1	['GO:0007178', 'GO:0009967', 'GO:0090092']
556	GO:BP	GO:0061440	kidney vasculature development	0.0275113	TRUE	"The process whose specific outcome is the progression of the vasculature of the kidney over time, from its formation to the mature structure." [GOC:dph, GOC:mtg_kidney_jan10, PMID:11891195]	30	1346	10	21118	0.00742942	0.333333	query_1	['GO:0001822', 'GO:0061437']
557	GO:BP	GO:0061437	renal system vasculature development	0.0275113	TRUE	"The process whose specific outcome is the progression of vasculature of the renal system over time, from its formation to the mature structure." [GOC:dph, GOC:mtg_kidney_jan10, PMID:11891195]	30	1346	10	21118	0.00742942	0.333333	query_1	['GO:0001944', 'GO:0072001']
558	GO:BP	GO:0055006	cardiac cell development	0.0277947	TRUE	"The process whose specific outcome is the progression of a cardiac cell over time, from its formation to the mature state. A cardiac cell is a cell that will form part of the cardiac organ of an individual." [GOC:devbiol]	97	1346	19	21118	0.0141159	0.195876	query_1	['GO:0035051', 'GO:0048468']
559	GO:BP	GO:0044344	cellular response to fibroblast growth factor stimulus	0.0277947	TRUE	"Any process that results in a change in state or activity of a cell (in terms of movement, secretion, enzyme production, gene expression, etc.) as a result of an fibroblast growth factor stimulus." [GOC:jl, GOC:yaf]	97	1346	19	21118	0.0141159	0.195876	query_1	['GO:0071363', 'GO:0071495', 'GO:0071774']
560	GO:BP	GO:0097746	blood vessel diameter maintenance	0.028149	TRUE	"Any process that modulates the diameter of blood vessels." [GOC:pr]	151	1346	25	21118	0.0185736	0.165563	query_1	['GO:0003018', 'GO:0008015', 'GO:0035296']
561	GO:BP	GO:0072175	epithelial tube formation	0.028149	TRUE	"The developmental process pertaining to the initial formation of an epithelial tube." [GOC:mtg_kidney_jan10]	151	1346	25	21118	0.0185736	0.165563	query_1	['GO:0035148', 'GO:0060562']
562	GO:BP	GO:0035296	regulation of tube diameter	0.028149	TRUE	"Any process that modulates the diameter of a tube." [GOC:bf]	151	1346	25	21118	0.0185736	0.165563	query_1	['GO:0035150']
563	GO:BP	GO:0003197	endocardial cushion development	0.0286621	TRUE	"The progression of a cardiac cushion over time, from its initial formation to the mature structure. The endocardial cushion is a specialized region of mesenchymal cells that will give rise to the heart septa and valves." [GOC:mtg_heart]	43	1346	12	21118	0.0089153	0.27907	query_1	['GO:0007507', 'GO:0060485']
564	GO:BP	GO:0030324	lung development	0.0296332	TRUE	"The process whose specific outcome is the progression of the lung over time, from its formation to the mature structure. In all air-breathing vertebrates the lungs are developed from the ventral wall of the oesophagus as a pouch which divides into two sacs. In amphibians and many reptiles the lungs retain very nearly this primitive sac-like character, but in the higher forms the connection with …	210	1346	31	21118	0.0230312	0.147619	query_1	['GO:0030323', 'GO:0048513', 'GO:0060541']
565	GO:BP	GO:0048593	camera-type eye morphogenesis	0.0302394	TRUE	"The process in which the anatomical structures of the eye are generated and organized. The camera-type eye is an organ of sight that receives light through an aperture and focuses it through a lens, projecting it on a photoreceptor field." [GOC:jid, GOC:mtg_sensu]	133	1346	23	21118	0.0170877	0.172932	query_1	['GO:0043010', 'GO:0048592']
566	GO:BP	GO:0046903	secretion	0.0304883	TRUE	"The controlled release of a substance by a cell or a tissue." [GOC:ai]	1034	1346	101	21118	0.0750371	0.0976789	query_1	['GO:0006810']
567	GO:BP	GO:0043407	negative regulation of MAP kinase activity	0.0312332	TRUE	"Any process that stops, prevents, or reduces the frequency, rate or extent of MAP kinase activity." [GOC:dph, GOC:go_curators]	73	1346	16	21118	0.0118871	0.219178	query_1	['GO:0043405', 'GO:0043409', 'GO:0071901']
568	GO:BP	GO:0035150	regulation of tube size	0.0316833	TRUE	"Ensuring that a tube is of the correct length and diameter. Tube size must be maintained not only during tube formation, but also throughout development and in some physiological processes." [PMID:10887083]	152	1346	25	21118	0.0185736	0.164474	query_1	['GO:0090066']
569	GO:BP	GO:0051250	negative regulation of lymphocyte activation	0.0316833	TRUE	"Any process that stops, prevents, or reduces the frequency, rate or extent of lymphocyte activation." [GOC:ai]	152	1346	25	21118	0.0185736	0.164474	query_1	['GO:0002695', 'GO:0046649', 'GO:0051249']
570	GO:BP	GO:0010638	positive regulation of organelle organization	0.0321494	TRUE	"Any process that increases the frequency, rate or extent of a process involved in the formation, arrangement of constituent parts, or disassembly of an organelle." [GOC:dph, GOC:tb]	590	1346	65	21118	0.0482912	0.110169	query_1	['GO:0006996', 'GO:0033043', 'GO:0051130']
571	GO:BP	GO:0060349	bone morphogenesis	0.0324447	TRUE	"The process in which bones are generated and organized." [GOC:dph]	98	1346	19	21118	0.0141159	0.193878	query_1	['GO:0009887', 'GO:0048705', 'GO:0060348']
572	GO:BP	GO:0033043	regulation of organelle organization	0.0338938	TRUE	"Any process that modulates the frequency, rate or extent of a process involved in the formation, arrangement of constituent parts, or disassembly of an organelle." [GOC:mah]	1178	1346	112	21118	0.0832095	0.0950764	query_1	['GO:0006996', 'GO:0051128']
573	GO:BP	GO:0031099	regeneration	0.0346106	TRUE	"The regrowth of a lost or destroyed body part, such as an organ or tissue. This process may occur via renewal, repair, and/or growth alone (i.e. increase in size or mass)." [GOC:mah, GOC:pr]	232	1346	33	21118	0.0245171	0.142241	query_1	['GO:0048856']
574	GO:BP	GO:0050808	synapse organization	0.0347685	TRUE	"A process that is carried out at the cellular level which results in the assembly, arrangement of constituent parts, or disassembly of a synapse, the junction between a neuron and a target (neuron, muscle, or secretory cell)." [GOC:ai, GOC:pr]	474	1346	55	21118	0.0408618	0.116034	query_1	['GO:0034330']
575	GO:BP	GO:0017015	regulation of transforming growth factor beta receptor signaling pathway	0.0349581	TRUE	"Any process that modulates the frequency, rate or extent of activity of any TGF-beta receptor signaling pathway." [GOC:mah]	116	1346	21	21118	0.0156018	0.181034	query_1	['GO:0007179', 'GO:0090092', 'GO:1903844']
576	GO:BP	GO:0001570	vasculogenesis	0.034977	TRUE	"The differentiation of endothelial cells from progenitor cells during blood vessel development, and the de novo formation of blood vessels and tubes." [PMID:8999798]	90	1346	18	21118	0.013373	0.2	query_1	['GO:0030154', 'GO:0048514']
577	GO:BP	GO:0061351	neural precursor cell proliferation	0.0357092	TRUE	"The multiplication or reproduction of neural precursor cells, resulting in the expansion of a cell population. A neural precursor cell is either a nervous system stem cell or a nervous system progenitor cell." [GOC:dph, GOC:yaf]	182	1346	28	21118	0.0208024	0.153846	query_1	['GO:0008283']
578	GO:BP	GO:0030850	prostate gland development	0.036592	TRUE	"The process whose specific outcome is the progression of the prostate gland over time, from its formation to the mature structure. The prostate gland is a partly muscular, partly glandular body that is situated near the base of the mammalian male urethra and secretes an alkaline viscid fluid which is a major constituent of the ejaculatory fluid." [PMID:11839751]	51	1346	13	21118	0.00965825	0.254902	query_1	['GO:0001655', 'GO:0048608', 'GO:0048732']
579	GO:BP	GO:0042733	embryonic digit morphogenesis	0.0366917	TRUE	"The process, occurring in the embryo, by which the anatomical structures of the digit are generated and organized. A digit is one of the terminal divisions of an appendage, such as a finger or toe." [GOC:bf, GOC:jl, UBERON:0002544]	66	1346	15	21118	0.0111441	0.227273	query_1	['GO:0030326', 'GO:0048598']
580	GO:BP	GO:0018108	peptidyl-tyrosine phosphorylation	0.0373799	TRUE	"The phosphorylation of peptidyl-tyrosine to form peptidyl-O4'-phospho-L-tyrosine." [RESID:AA0039]	384	1346	47	21118	0.0349183	0.122396	query_1	['GO:0006468', 'GO:0018212']
581	GO:BP	GO:0072331	signal transduction by p53 class mediator	0.0389291	TRUE	"An intracellular signaling process that is induced by the cell cycle regulator phosphoprotein p53 or an equivalent protein." [GOC:mah]	135	1346	23	21118	0.0170877	0.17037	query_1	['GO:0035556']
582	GO:BP	GO:0018022	peptidyl-lysine methylation	0.0389291	TRUE	"The methylation of peptidyl-lysine to form either the mono-, di- or trimethylated derivative." [GOC:ai]	135	1346	23	21118	0.0170877	0.17037	query_1	['GO:0006479', 'GO:0018205']
583	GO:BP	GO:1903047	mitotic cell cycle process	0.0394179	TRUE	"A process that is part of the mitotic cell cycle." [GO_REF:0000060, GOC:mtg_cell_cycle, GOC:TermGenie]	666	1346	71	21118	0.0527489	0.106607	query_1	['GO:0000278', 'GO:0022402']
584	GO:BP	GO:0050868	negative regulation of T cell activation	0.0400822	TRUE	"Any process that stops, prevents, or reduces the frequency, rate or extent of T cell activation." [GOC:ai]	117	1346	21	21118	0.0156018	0.179487	query_1	['GO:0042110', 'GO:0050863', 'GO:0051250', 'GO:1903038']
585	GO:BP	GO:0048545	response to steroid hormone	0.0413133	TRUE	"Any process that results in a change in state or activity of a cell or an organism (in terms of movement, secretion, enzyme production, gene expression, etc.) as a result of a steroid hormone stimulus." [GOC:go_curators]	352	1346	44	21118	0.0326895	0.125	query_1	['GO:0009725', 'GO:0014070', 'GO:0033993']
586	GO:BP	GO:0046165	alcohol biosynthetic process	0.04407	TRUE	"The chemical reactions and pathways resulting in the formation of alcohols, any of a class of compounds containing one or more hydroxyl groups attached to a saturated carbon atom." [GOC:ai]	136	1346	23	21118	0.0170877	0.169118	query_1	['GO:0006066', 'GO:0044283', 'GO:1901617']
587	GO:BP	GO:0045600	positive regulation of fat cell differentiation	0.0445161	TRUE	"Any process that activates or increases the frequency, rate or extent of adipocyte differentiation." [GOC:go_curators]	67	1346	15	21118	0.0111441	0.223881	query_1	['GO:0045444', 'GO:0045597', 'GO:0045598']
588	GO:BP	GO:0072078	nephron tubule morphogenesis	0.0448962	TRUE	"The process in which the anatomical structures of a nephron tubule are generated and organized. A nephron tubule is an epithelial tube that is part of the nephron, the functional part of the kidney." [GOC:mtg_kidney_jan10]	75	1346	16	21118	0.0118871	0.213333	query_1	['GO:0061333', 'GO:0072080', 'GO:0072088']
589	GO:BP	GO:0018212	peptidyl-tyrosine modification	0.0457893	TRUE	"The modification of peptidyl-tyrosine." [GOC:go_curators]	387	1346	47	21118	0.0349183	0.121447	query_1	['GO:0018193']
590	GO:BP	GO:0043502	regulation of muscle adaptation	0.0458728	TRUE	"Any process that modulates the frequency, rate or extent of muscle adaptation." [GOC:go_curators, GOC:mtg_muscle]	118	1346	21	21118	0.0156018	0.177966	query_1	['GO:0043500', 'GO:0048583', 'GO:0090257']
591	GO:BP	GO:0032330	regulation of chondrocyte differentiation	0.0459632	TRUE	"Any process that modulates the frequency, rate or extent of chondrocyte differentiation." [GOC:mah]	52	1346	13	21118	0.00965825	0.25	query_1	['GO:0002062', 'GO:0045595', 'GO:0061035']
592	GO:BP	GO:0035970	peptidyl-threonine dephosphorylation	0.0467371	TRUE	"The removal of phosphoric residues from peptidyl-O-phospho-L-threonine to form peptidyl-threonine." [GOC:bf]	20	1346	8	21118	0.00594354	0.4	query_1	['GO:0006470']
593	GO:BP	GO:2000136	regulation of cell proliferation involved in heart morphogenesis	0.0467371	TRUE	"Any process that modulates the frequency, rate or extent of cell proliferation involved in heart morphogenesis." [GOC:dph]	20	1346	8	21118	0.00594354	0.4	query_1	['GO:0042127', 'GO:0061323']
594	GO:BP	GO:0002683	negative regulation of immune system process	0.0488092	TRUE	"Any process that stops, prevents, or reduces the frequency, rate, or extent of an immune system process." [GOC:add]	422	1346	50	21118	0.0371471	0.118483	query_1	['GO:0002376', 'GO:0002682', 'GO:0048519']
595	GO:BP	GO:0016125	sterol metabolic process	0.0498163	TRUE	"The chemical reactions and pathways involving sterols, steroids with one or more hydroxyl groups and a hydrocarbon side-chain in the molecule." [ISBN:0198547684]	137	1346	23	21118	0.0170877	0.167883	query_1	['GO:0008202', 'GO:1901615']
596	GO:BP	GO:1901615	organic hydroxy compound metabolic process	0.0502527	FALSE	"The chemical reactions and pathways involving organic hydroxy compound." [GOC:pr, GOC:TermGenie]	527	1346	59	21118	0.0438336	0.111954	query_1	['GO:0071704']
597	GO:BP	GO:1902106	negative regulation of leukocyte differentiation	0.0508734	FALSE	"Any process that stops, prevents or reduces the frequency, rate or extent of leukocyte differentiation." [GOC:add, GOC:TermGenie]	101	1346	19	21118	0.0141159	0.188119	query_1	['GO:0002521', 'GO:0045596', 'GO:1902105', 'GO:1903707']
598	GO:BP	GO:0001658	branching involved in ureteric bud morphogenesis	0.0514495	FALSE	"The process in which the branching structure of the ureteric bud is generated and organized. The ureteric bud is an epithelial tube that grows out from the metanephric duct. The bud elongates and branches to give rise to the ureter and kidney collecting tubules." [GOC:dph, PMID:16916378]	60	1346	14	21118	0.0104012	0.233333	query_1	['GO:0048754', 'GO:0060675']
599	GO:BP	GO:0060688	regulation of morphogenesis of a branching structure	0.0514495	FALSE	"Any process that modulates the rate, frequency, or extent of branching morphogenesis, the process in which the anatomical structures of branches are generated and organized." [GOC:dph]	60	1346	14	21118	0.0104012	0.233333	query_1	['GO:0001763', 'GO:0022603', 'GO:0051239']
600	GO:BP	GO:0016331	morphogenesis of embryonic epithelium	0.0521416	FALSE	"The process in which the anatomical structures of embryonic epithelia are generated and organized." [GOC:jl]	166	1346	26	21118	0.0193165	0.156627	query_1	['GO:0002009', 'GO:0048598']
601	GO:BP	GO:1903844	regulation of cellular response to transforming growth factor beta stimulus	0.0524053	FALSE	"Any process that modulates the frequency, rate or extent of cellular response to transforming growth factor beta stimulus." [GO_REF:0000058, GOC:BHF, GOC:BHF_miRNA, GOC:rph, GOC:TermGenie, PMID:22269326]	119	1346	21	21118	0.0156018	0.176471	query_1	['GO:0071560', 'GO:0090287']
602	GO:BP	GO:0021543	pallium development	0.0539045	FALSE	"The process whose specific outcome is the progression of the pallium over time, from its formation to the mature structure. The pallium is the roof region of the telencephalon." [GO_REF:0000021, GOC:cls, GOC:dgh, GOC:dph, GOC:jid, PMID:12626695]	196	1346	29	21118	0.0215453	0.147959	query_1	['GO:0021537', 'GO:0048856']
603	GO:BP	GO:0048871	multicellular organismal homeostasis	0.0539165	FALSE	"Any process involved in the maintenance of an internal steady state at the level of the multicellular organism." [GOC:isa_complete]	493	1346	56	21118	0.0416048	0.11359	query_1	['GO:0032501', 'GO:0042592']
604	GO:BP	GO:0030318	melanocyte differentiation	0.0544393	FALSE	"The process in which a relatively unspecialized cell acquires specialized features of a melanocyte." [GOC:mah]	26	1346	9	21118	0.00668648	0.346154	query_1	['GO:0050931']
605	GO:BP	GO:0060437	lung growth	0.0546583	FALSE	"The increase in size or mass of a lung. In all air-breathing vertebrates the lungs are developed from the ventral wall of the oesophagus as a pouch which divides into two sacs. In amphibians and many reptiles the lungs retain very nearly this primitive sac-like character, but in the higher forms the connection with the esophagus becomes elongated into the windpipe and the inner walls of the sacs…	7	1346	5	21118	0.00371471	0.714286	query_1	['GO:0030324', 'GO:0035265']
606	GO:BP	GO:0060872	semicircular canal development	0.0546583	FALSE	"The progression of the semicircular canal from its initial formation to the mature structure." [GOC:dph, GOC:sdb_2009, GOC:tb]	7	1346	5	21118	0.00371471	0.714286	query_1	['GO:0035295', 'GO:0048839']
607	GO:BP	GO:1903038	negative regulation of leukocyte cell-cell adhesion	0.0584208	FALSE	"Any process that stops, prevents or reduces the frequency, rate or extent of leukocyte cell-cell adhesion." [GO_REF:0000058, GOC:BHF, GOC:rl, GOC:TermGenie, PMID:21106532]	129	1346	22	21118	0.0163447	0.170543	query_1	['GO:0007159', 'GO:0022408', 'GO:1903037']
608	GO:BP	GO:0003018	vascular process in circulatory system	0.058703	FALSE	"A circulatory process that occurs at the level of the vasculature." [GOC:mtg_cardio]	207	1346	30	21118	0.0222883	0.144928	query_1	['GO:0003013']
609	GO:BP	GO:0030279	negative regulation of ossification	0.0599212	FALSE	"Any process that stops, prevents, or reduces the frequency, rate or extent of ossification, the formation of bone or of a bony substance or the conversion of fibrous tissue or of cartilage into bone or a bony substance." [GOC:go_curators]	39	1346	11	21118	0.00817236	0.282051	query_1	['GO:0001503', 'GO:0030278', 'GO:0051241']
610	GO:BP	GO:0042633	hair cycle	0.0599905	FALSE	"The cyclical phases of growth (anagen), regression (catagen), quiescence (telogen), and shedding (exogen) in the life of a hair; one of the collection or mass of filaments growing from the skin of an animal, and forming a covering for a part of the head or for any part or the whole of the body." [GOC:go_curators, PMID:12230507]	111	1346	20	21118	0.0148588	0.18018	query_1	['GO:0042303']
611	GO:BP	GO:0042303	molting cycle	0.0599905	FALSE	"The periodic casting off and regeneration of an outer covering of cuticle, feathers, hair, horns, skin, etc." [GOC:jl, ISBN:0198506732]	111	1346	20	21118	0.0148588	0.18018	query_1	['GO:0032501']
612	GO:BP	GO:0010463	mesenchymal cell proliferation	0.060846	FALSE	"The multiplication or reproduction of cells, resulting in the expansion of a mesenchymal cell population. A mesenchymal cell is a cell that normally gives rise to other cells that are organized as three-dimensional masses, rather than sheets." [GOC:dph, GOC:tb]	46	1346	12	21118	0.0089153	0.26087	query_1	['GO:0008283']
613	GO:BP	GO:2001236	regulation of extrinsic apoptotic signaling pathway	0.062757	FALSE	"Any process that modulates the frequency, rate or extent of extrinsic apoptotic signaling pathway." [GOC:mtg_apoptosis]	158	1346	25	21118	0.0185736	0.158228	query_1	['GO:0097191', 'GO:2001233']
614	GO:BP	GO:0060272	embryonic skeletal joint morphogenesis	0.0644134	FALSE	"The process in which the anatomical structures of skeletal joints are generated and organized during the embryonic phase. A skeletal joint is the connecting structure between the bones of the skeleton." [GOC:bf, GOC:BHF, GOC:dph, UBERON:0000982]	11	1346	6	21118	0.00445765	0.545455	query_1	['GO:0048704', 'GO:0072498']
615	GO:BP	GO:0045766	positive regulation of angiogenesis	0.0646161	FALSE	"Any process that activates or increases angiogenesis." [GOC:go_curators]	168	1346	26	21118	0.0193165	0.154762	query_1	['GO:0001525', 'GO:0045765', 'GO:1904018']
616	GO:BP	GO:1904018	positive regulation of vasculature development	0.0646161	FALSE	"Any process that activates or increases the frequency, rate or extent of vasculature development." [GO_REF:0000058, GOC:TermGenie, PMID:21472453]	168	1346	26	21118	0.0193165	0.154762	query_1	['GO:0001944', 'GO:0051094', 'GO:0051240', 'GO:1901342']
617	GO:BP	GO:0008344	adult locomotory behavior	0.0652276	FALSE	"Locomotory behavior in a fully developed and mature organism." [GOC:ai]	94	1346	18	21118	0.013373	0.191489	query_1	['GO:0007626', 'GO:0030534']
618	GO:BP	GO:0001708	cell fate specification	0.0652276	FALSE	"The process involved in the specification of cell identity. Once specification has taken place, a cell will be committed to differentiate down a specific pathway if left in its normal environment." [GOC:go_curators]	94	1346	18	21118	0.013373	0.191489	query_1	['GO:0045165', 'GO:0048869']
619	GO:BP	GO:0014910	regulation of smooth muscle cell migration	0.0652276	FALSE	"Any process that modulates the frequency, rate or extent of smooth muscle cell migration." [CL:0000192, GOC:mtg_muscle]	94	1346	18	21118	0.013373	0.191489	query_1	['GO:0014909', 'GO:0030334']
620	GO:BP	GO:0002695	negative regulation of leukocyte activation	0.0658798	FALSE	"Any process that stops, prevents, or reduces the frequency, rate, or extent of leukocyte activation." [GOC:add]	188	1346	28	21118	0.0208024	0.148936	query_1	['GO:0002683', 'GO:0002694', 'GO:0045321', 'GO:0050866']
621	GO:BP	GO:1903707	negative regulation of hemopoiesis	0.0678871	FALSE	"Any process that stops, prevents or reduces the frequency, rate or extent of hemopoiesis." [GO_REF:0000058, GOC:pad, GOC:PARL, GOC:TermGenie, PMID:20080761]	103	1346	19	21118	0.0141159	0.184466	query_1	['GO:0002683', 'GO:0030097', 'GO:0051093', 'GO:0051241', 'GO:1903706']
622	GO:BP	GO:0031058	positive regulation of histone modification	0.0678871	FALSE	"Any process that activates or increases the frequency, rate or extent of the covalent alteration of a histone." [GOC:mah]	103	1346	19	21118	0.0141159	0.184466	query_1	['GO:0016570', 'GO:0031056', 'GO:0031401', 'GO:1905269']
623	GO:BP	GO:0001666	response to hypoxia	0.0690708	FALSE	"Any process that results in a change in state or activity of a cell or an organism (in terms of movement, secretion, enzyme production, gene expression, etc.) as a result of a stimulus indicating lowered oxygen tension. Hypoxia, defined as a decline in O2 levels below normoxic levels of 20.8 - 20.95%, results in metabolic adaptation at both the cellular and organismal level." [GOC:hjd]	326	1346	41	21118	0.0304606	0.125767	query_1	['GO:0006950', 'GO:0036293']
624	GO:BP	GO:0035116	embryonic hindlimb morphogenesis	0.0710905	FALSE	"The process, occurring in the embryo, by which the anatomical structures of the hindlimbs are generated and organized. The hindlimbs are the posterior limbs of an animal." [ISBN:0198612001]	33	1346	10	21118	0.00742942	0.30303	query_1	['GO:0030326', 'GO:0035137']
625	GO:BP	GO:0003203	endocardial cushion morphogenesis	0.0710905	FALSE	"The process in which the anatomical structure of the endocardial cushion is generated and organized. The endocardial cushion is a specialized region of mesenchymal cells that will give rise to the heart septa and valves." [GOC:mtg_heart]	33	1346	10	21118	0.00742942	0.30303	query_1	['GO:0003007', 'GO:0003197', 'GO:0072132']
626	GO:BP	GO:0030902	hindbrain development	0.0726759	FALSE	"The process whose specific outcome is the progression of the hindbrain over time, from its formation to the mature structure. The hindbrain is the posterior of the three primary divisions of the developing chordate brain, or the corresponding part of the adult brain (in vertebrates, includes the cerebellum, pons, and medulla oblongata and controls the autonomic functions and equilibrium)." [http…	179	1346	27	21118	0.0200594	0.150838	query_1	['GO:0007420', 'GO:0048856']
627	GO:BP	GO:2001234	negative regulation of apoptotic signaling pathway	0.0730617	FALSE	"Any process that stops, prevents or reduces the frequency, rate or extent of apoptotic signaling pathway." [GOC:mtg_apoptosis]	230	1346	32	21118	0.0237741	0.13913	query_1	['GO:0009968', 'GO:0043066', 'GO:0097190', 'GO:2001233']
628	GO:BP	GO:0016571	histone methylation	0.0752941	FALSE	"The modification of histones by addition of methyl groups." [GOC:ai]	150	1346	24	21118	0.0178306	0.16	query_1	['GO:0006479', 'GO:0016570']
629	GO:BP	GO:0072088	nephron epithelium morphogenesis	0.075364	FALSE	"The process in which the anatomical structures of the nephron epithelium are generated and organized. The nephron epithelium is a tissue that covers the surface of a nephron." [GOC:mtg_kidney_jan10]	78	1346	16	21118	0.0118871	0.205128	query_1	['GO:0002009', 'GO:0072009', 'GO:0072028']
630	GO:BP	GO:0048066	developmental pigmentation	0.0770017	FALSE	"The developmental process that results in the deposition of coloring matter in an organism, tissue or cell." [ISBN:0582227089]	47	1346	12	21118	0.0089153	0.255319	query_1	['GO:0043473']
631	GO:BP	GO:0043406	positive regulation of MAP kinase activity	0.0776617	FALSE	"Any process that activates or increases the frequency, rate or extent of MAP kinase activity." [GOC:dph, GOC:go_curators]	210	1346	30	21118	0.0222883	0.142857	query_1	['GO:0043405', 'GO:0043410', 'GO:0071902']
632	GO:BP	GO:0035886	vascular associated smooth muscle cell differentiation	0.0779169	FALSE	"The process in which a relatively unspecialized cell acquires specialized features of a vascular smooth muscle cell." [GOC:sl, PMID:16151017, PMID:18267954]	40	1346	11	21118	0.00817236	0.275	query_1	['GO:0001944', 'GO:0051145']
633	GO:BP	GO:0048536	spleen development	0.0779169	FALSE	"The process whose specific outcome is the progression of the spleen over time, from its formation to the mature structure. The spleen is a large vascular lymphatic organ composed of white and red pulp, involved both in hemopoietic and immune system functions." [GOC:add, ISBN:0781735149]	40	1346	11	21118	0.00817236	0.275	query_1	['GO:0048534']
634	GO:BP	GO:0001838	embryonic epithelial tube formation	0.0801834	FALSE	"The morphogenesis of an embryonic epithelium into a tube-shaped structure." [GOC:dph, ISBN:0824072820]	141	1346	23	21118	0.0170877	0.163121	query_1	['GO:0016331', 'GO:0072175']
635	GO:BP	GO:0002076	osteoblast development	0.0802007	FALSE	"The process whose specific outcome is the progression of an osteoblast over time, from its formation to the mature structure. Osteoblast development does not include the steps involved in committing a cranial neural crest cell or an osteoprogenitor cell to an osteoblast fate. An osteoblast is a cell that gives rise to bone." [GOC:dph]	16	1346	7	21118	0.00520059	0.4375	query_1	['GO:0001649', 'GO:0048468']
636	GO:BP	GO:0055001	muscle cell development	0.0804028	FALSE	"The process whose specific outcome is the progression of a muscle cell over time, from its formation to the mature structure. Muscle cell development does not include the steps involved in committing an unspecified cell to the muscle cell fate." [CL:0000187, GOC:devbiol]	180	1346	27	21118	0.0200594	0.15	query_1	['GO:0042692', 'GO:0048468']
637	GO:BP	GO:0048706	embryonic skeletal system development	0.0844342	FALSE	"The process, occurring during the embryonic phase, whose specific outcome is the progression of the skeleton over time, from its formation to the mature structure." [GOC:dph, GOC:dsf, GOC:jid, GOC:tb, PMID:16049113]	132	1346	22	21118	0.0163447	0.166667	query_1	['GO:0001501', 'GO:0043009']
638	GO:BP	GO:0045321	leukocyte activation	0.0850985	FALSE	"A change in morphology and behavior of a leukocyte resulting from exposure to a specific antigen, mitogen, cytokine, cellular ligand, or soluble factor." [GOC:add]	996	1346	96	21118	0.0713224	0.0963855	query_1	['GO:0001775', 'GO:0002376']
639	GO:BP	GO:0010976	positive regulation of neuron projection development	0.0851212	FALSE	"Any process that increases the rate, frequency or extent of neuron projection development. Neuron projection development is the process whose specific outcome is the progression of a neuron projection over time, from its formation to the mature structure. A neuron projection is any process extending from a neural cell, such as axons or dendrites (collectively called neurites)." [GOC:dph, GOC:tb]	211	1346	30	21118	0.0222883	0.14218	query_1	['GO:0010975', 'GO:0031175', 'GO:0031346']
640	GO:BP	GO:1901655	cellular response to ketone	0.0896552	FALSE	"Any process that results in a change in state or activity of a cell (in terms of movement, secretion, enzyme production, gene expression, etc.) as a result of a ketone stimulus." [GOC:pr, GOC:TermGenie]	114	1346	20	21118	0.0148588	0.175439	query_1	['GO:1901654', 'GO:1901701']
641	GO:BP	GO:0010837	regulation of keratinocyte proliferation	0.0949857	FALSE	"Any process that modulates the rate, frequency or extent of keratinocyte proliferation. Keratinocyte proliferation is the multiplication or reproduction of keratinocytes, resulting in the expansion of a cell population." [GOC:dph, GOC:tb]	34	1346	10	21118	0.00742942	0.294118	query_1	['GO:0043616', 'GO:0050678']
642	GO:BP	GO:0048730	epidermis morphogenesis	0.0949857	FALSE	"The process in which the anatomical structures of the epidermis are generated and organized. The epidermis is the outer epithelial layer of an animal, it may be a single layer that produces an extracellular material (e.g. the cuticle of arthropods) or a complex stratified squamous epithelium, as in the case of many vertebrate species." [GOC:jid, UBERON:0001003]	34	1346	10	21118	0.00742942	0.294118	query_1	['GO:0002009', 'GO:0008544']
643	GO:BP	GO:0051170	import into nucleus	0.0979719	FALSE	"The directed movement of substances into the nucleus." [GOC:ai]	172	1346	26	21118	0.0193165	0.151163	query_1	['GO:0006913']
644	GO:BP	GO:0016358	dendrite development	0.0988306	FALSE	"The process whose specific outcome is the progression of the dendrite over time, from its formation to the mature structure." [GOC:aruk, GOC:bc, GOC:jl, ISBN:0198506732, PMID:22683681]	287	1346	37	21118	0.0274889	0.12892	query_1	['GO:0031175', 'GO:0048856']
645	GO:BP	GO:0043269	regulation of ion transport	0.0989979	FALSE	"Any process that modulates the frequency, rate or extent of the directed movement of charged atoms or small charged molecules into, out of or within a cell, or between cells, by means of some agent such as a transporter or pore." [GOC:jl]	722	1346	74	21118	0.0549777	0.102493	query_1	['GO:0006811', 'GO:0051049']
646	GO:BP	GO:0035137	hindlimb morphogenesis	0.100391	FALSE	"The process in which the anatomical structures of the hindlimb are generated and organized." [GOC:go_curators]	41	1346	11	21118	0.00817236	0.268293	query_1	['GO:0035108']
647	GO:BP	GO:0010614	negative regulation of cardiac muscle hypertrophy	0.100391	FALSE	"Any process that decreases the rate, frequency or extent of the enlargement or overgrowth of all or part of the heart due to an increase in size (not length) of individual cardiac muscle fibers, without cell division." [GOC:BHF, GOC:dph, GOC:tb]	41	1346	11	21118	0.00817236	0.268293	query_1	['GO:0003300', 'GO:0010611', 'GO:0014741']
648	GO:BP	GO:0043500	muscle adaptation	0.100892	FALSE	"A process in which muscle adapts, with consequent modifications to structural and/or functional phenotypes, in response to a stimulus. Stimuli include contractile activity, loading conditions, substrate supply, and environmental factors. These adaptive events occur in both muscle fibers and associated structures (motoneurons and capillaries), and they involve alterations in regulatory mechanisms…	143	1346	23	21118	0.0170877	0.160839	query_1	['GO:0003012', 'GO:0050896']
649	GO:BP	GO:0007498	mesoderm development	0.102123	FALSE	"The process whose specific outcome is the progression of the mesoderm over time, from its formation to the mature structure. The mesoderm is the middle germ layer that develops into muscle, bone, cartilage, blood and connective tissue." [GOC:dph, GOC:tb]	115	1346	20	21118	0.0148588	0.173913	query_1	['GO:0009888']
650	GO:BP	GO:0050865	regulation of cell activation	0.102371	FALSE	"Any process that modulates the frequency, rate or extent of cell activation, the change in the morphology or behavior of a cell resulting from exposure to an activating factor such as a cellular or soluble ligand." [GOC:ai]	698	1346	72	21118	0.0534918	0.103152	query_1	['GO:0001775', 'GO:0050794']
651	GO:BP	GO:0010629	negative regulation of gene expression	0.105472	FALSE	"Any process that decreases the frequency, rate or extent of gene expression. Gene expression is the process in which a gene's coding sequence is converted into a mature gene product or products (proteins or RNA). This includes the production of an RNA transcript as well as any processing to produce a mature RNA product or an mRNA or circRNA (for protein-coding genes) and the translation of that …	1105	1346	104	21118	0.077266	0.0941176	query_1	['GO:0010467', 'GO:0010468', 'GO:0010605']
652	GO:BP	GO:0031056	regulation of histone modification	0.107385	FALSE	"Any process that modulates the frequency, rate or extent of the covalent alteration of a histone." [GOC:mah]	163	1346	25	21118	0.0185736	0.153374	query_1	['GO:0016570', 'GO:0031399', 'GO:1902275']
653	GO:BP	GO:0001659	temperature homeostasis	0.108435	FALSE	"A homeostatic process in which an organism modulates its internal body temperature." [GOC:jl]	173	1346	26	21118	0.0193165	0.150289	query_1	['GO:0048871']
654	GO:BP	GO:0050730	regulation of peptidyl-tyrosine phosphorylation	0.112346	FALSE	"Any process that modulates the frequency, rate or extent of the phosphorylation of peptidyl-tyrosine." [GOC:ai]	267	1346	35	21118	0.026003	0.131086	query_1	['GO:0001932', 'GO:0018108']
655	GO:BP	GO:1905269	positive regulation of chromatin organization	0.116116	FALSE	"Any process that activates or increases the frequency, rate or extent of chromatin organization." [GO_REF:0000058, GOC:pr, GOC:TermGenie, GOC:vw, PMID:654321]	116	1346	20	21118	0.0148588	0.172414	query_1	['GO:0006325', 'GO:1902275', 'GO:2001252']
656	GO:BP	GO:0051099	positive regulation of binding	0.117588	FALSE	"Any process that activates or increases the rate or extent of binding, the selective interaction of a molecule with one or more specific sites on another molecule." [GOC:ai]	194	1346	28	21118	0.0208024	0.14433	query_1	['GO:0044093', 'GO:0051098']
657	GO:BP	GO:0003263	cardioblast proliferation	0.12186	FALSE	"The multiplication or reproduction of cardioblasts, resulting in the expansion of the population in the heart field. A cardioblast is a cardiac precursor cell. It is a cell that has been committed to a cardiac fate, but will undergo more cell division rather than terminally differentiating." [GOC:mtg_heart]	12	1346	6	21118	0.00445765	0.5	query_1	['GO:0060914', 'GO:0061323']
658	GO:BP	GO:0003264	regulation of cardioblast proliferation	0.12186	FALSE	"Any process that modulates the frequency, rate or extent of cardioblast proliferation. A cardioblast is a cardiac precursor cell. It is a cell that has been committed to a cardiac fate, but will undergo more cell division rather than terminally differentiating." [GOC:mtg_heart]	12	1346	6	21118	0.00445765	0.5	query_1	['GO:0003263', 'GO:2000136']
659	GO:BP	GO:0060601	lateral sprouting from an epithelium	0.12186	FALSE	"The process in which a branch forms along the side of an epithelium." [GOC:dph]	12	1346	6	21118	0.00445765	0.5	query_1	['GO:0002009', 'GO:0061138']
660	GO:BP	GO:0007548	sex differentiation	0.122691	FALSE	"The establishment of the sex of an organism by physical differentiation." [GOC:ai]	323	1346	40	21118	0.0297177	0.123839	query_1	['GO:0003006']
661	GO:BP	GO:0071383	cellular response to steroid hormone stimulus	0.125895	FALSE	"Any process that results in a change in state or activity of a cell (in terms of movement, secretion, enzyme production, gene expression, etc.) as a result of a steroid hormone stimulus." [GOC:mah]	205	1346	29	21118	0.0215453	0.141463	query_1	['GO:0032870', 'GO:0048545', 'GO:0071396', 'GO:0071407']
662	GO:BP	GO:0060412	ventricular septum morphogenesis	0.128233	FALSE	"The developmental process in which a ventricular septum is generated and organized. A ventricular septum is an anatomical structure that separates the lower chambers (ventricles) of the heart from one another." [GOC:dph]	42	1346	11	21118	0.00817236	0.261905	query_1	['GO:0003281', 'GO:0060411']
663	GO:BP	GO:0072537	fibroblast activation	0.128838	FALSE	"A change in the morphology or behavior of a fibroblast resulting from exposure to an activating factor such as a cellular or soluble ligand." [CL:0000057, GOC:BHF, GOC:mah]	17	1346	7	21118	0.00520059	0.411765	query_1	['GO:0001775']
664	GO:BP	GO:0060947	cardiac vascular smooth muscle cell differentiation	0.128838	FALSE	"The process in which a relatively unspecialized cell acquires specialized features of a cardiac vascular smooth muscle cell. A cardiac vascular smooth muscle cell covers the heart vasculature and lacks transverse striations in its constituent fibers." [GOC:mtg_heart]	17	1346	7	21118	0.00520059	0.411765	query_1	['GO:0035051', 'GO:0035886', 'GO:0060976']
665	GO:BP	GO:1903522	regulation of blood circulation	0.12909	FALSE	"Any process that modulates the frequency, rate or extent of blood circulation." [GO_REF:0000058, GOC:mr, GOC:TermGenie, PMID:10659969]	258	1346	34	21118	0.02526	0.131783	query_1	['GO:0008015', 'GO:0044057']
666	GO:BP	GO:0007015	actin filament organization	0.130063	FALSE	"A process that is carried out at the cellular level which results in the assembly, arrangement of constituent parts, or disassembly of cytoskeletal structures comprising actin filaments. Includes processes that control the spatial distribution of actin filaments, such as organizing filaments into meshworks, bundles, or other structures, as by cross-linking." [GOC:mah]	438	1346	50	21118	0.0371471	0.114155	query_1	['GO:0030036', 'GO:0097435']
667	GO:BP	GO:0061180	mammary gland epithelium development	0.13056	FALSE	"The process whose specific outcome is the progression of the mammary gland epithelium over time, from its formation to the mature structure. The mammary gland is a large compound sebaceous gland that in female mammals is modified to secrete milk." [GOC:dph, GOC:yaf]	73	1346	15	21118	0.0111441	0.205479	query_1	['GO:0030879', 'GO:0060429']
668	GO:BP	GO:0003300	cardiac muscle hypertrophy	0.131793	FALSE	"The enlargement or overgrowth of all or part of the heart muscle due to an increase in size of cardiac muscle cells without cell division." [GOC:mtg_heart]	117	1346	20	21118	0.0148588	0.17094	query_1	['GO:0014897']
669	GO:BP	GO:0022607	cellular component assembly	0.13554	FALSE	"The aggregation, arrangement and bonding together of a cellular component." [GOC:isa_complete]	2739	1346	223	21118	0.165676	0.0814166	query_1	['GO:0016043', 'GO:0044085']
670	GO:BP	GO:0046649	lymphocyte activation	0.145314	FALSE	"A change in morphology and behavior of a lymphocyte resulting from exposure to a specific antigen, mitogen, cytokine, chemokine, cellular ligand, or soluble factor." [GOC:mgi_curators, ISBN:0781735149]	831	1346	82	21118	0.0609212	0.0986763	query_1	['GO:0045321']
671	GO:BP	GO:0009991	response to extracellular stimulus	0.1475	FALSE	"Any process that results in a change in state or activity of a cell or an organism (in terms of movement, secretion, enzyme production, gene expression, etc.) as a result of an extracellular stimulus." [GOC:go_curators]	559	1346	60	21118	0.0445765	0.107335	query_1	['GO:0009605']
672	GO:BP	GO:0035019	somatic stem cell population maintenance	0.149763	FALSE	"Any process by which an organism retains a population of somatic stem cells, undifferentiated cells in the embryo or adult which can undergo unlimited division and give rise to cell types of the body other than those of the germ-line." [GOC:bf, ISBN:0582227089]	50	1346	12	21118	0.0089153	0.24	query_1	['GO:0019827']
673	GO:BP	GO:0014033	neural crest cell differentiation	0.151451	FALSE	"The process in which a relatively unspecialized cell acquires specialized features of a neural crest cell." [GOC:dh, GOC:ef]	91	1346	17	21118	0.01263	0.186813	query_1	['GO:0048762', 'GO:0048863']
674	GO:BP	GO:0002028	regulation of sodium ion transport	0.151451	FALSE	"Any process that modulates the frequency, rate or extent of the directed movement of sodium ions (Na+) into, out of or within a cell, or between cells, by means of some agent such as a transporter or pore." [GOC:dph]	91	1346	17	21118	0.01263	0.186813	query_1	['GO:0006814', 'GO:0043269']
675	GO:BP	GO:0101023	vascular endothelial cell proliferation	0.153135	FALSE	"The multiplication or reproduction of blood vessel endothelial cells, resulting in the expansion of a cell population." [GOC:BHF, GOC:BHF_telomere, GOC:nc, PMID:23201774]	23	1346	8	21118	0.00594354	0.347826	query_1	['GO:0001935']
676	GO:BP	GO:1905562	regulation of vascular endothelial cell proliferation	0.153135	FALSE	"Any process that modulates the frequency, rate or extent of vascular endothelial cell proliferation." [GO_REF:0000058, GOC:BHF, GOC:BHF_telomere, GOC:nc, GOC:TermGenie, PMID:23201774]	23	1346	8	21118	0.00594354	0.347826	query_1	['GO:0001936', 'GO:0101023']
677	GO:BP	GO:0050918	positive chemotaxis	0.160355	FALSE	"The directed movement of a motile cell or organism towards a higher concentration of a chemical." [GOC:ai, GOC:bf, GOC:isa_complete]	66	1346	14	21118	0.0104012	0.212121	query_1	['GO:0006935']
678	GO:BP	GO:0002064	epithelial cell development	0.160471	FALSE	"The process whose specific outcome is the progression of an epithelial cell over time, from its formation to the mature structure. An epithelial cell is a cell usually found in a two-dimensional sheet with a free surface." [GOC:dph]	250	1346	33	21118	0.0245171	0.132	query_1	['GO:0030855', 'GO:0048468']
679	GO:BP	GO:0046631	alpha-beta T cell activation	0.160607	FALSE	"The change in morphology and behavior of an alpha-beta T cell resulting from exposure to a mitogen, cytokine, chemokine, cellular ligand, or an antigen for which it is specific." [GOC:add]	157	1346	24	21118	0.0178306	0.152866	query_1	['GO:0042110']
680	GO:BP	GO:0032924	activin receptor signaling pathway	0.162461	FALSE	"A series of molecular signals initiated by the binding of an extracellular ligand to an activin receptor on the surface of a target cell, and ending with regulation of a downstream cellular process, e.g. transcription." [GOC:rl, GOC:signaling]	43	1346	11	21118	0.00817236	0.255814	query_1	['GO:0007178']
681	GO:BP	GO:0014741	negative regulation of muscle hypertrophy	0.162461	FALSE	"Any process that stops, prevents, or reduces the frequency, rate, or extent of muscle hypertrophy." [GOC:mtg_muscle]	43	1346	11	21118	0.00817236	0.255814	query_1	['GO:0014743', 'GO:0014896', 'GO:0051241']
682	GO:BP	GO:0010092	specification of animal organ identity	0.163802	FALSE	"The regionalization process in which the identity of an animal organ primordium is specified. Identity is considered to be the aggregate of characteristics by which a structure is recognized." [GOC:tb]	36	1346	10	21118	0.00742942	0.277778	query_1	['GO:0003002', 'GO:0048645']
683	GO:BP	GO:0050931	pigment cell differentiation	0.163802	FALSE	"The process in which a relatively unspecialized cell acquires the specialized features of a pigmented cell, such as a melanocyte." [GOC:dgh]	36	1346	10	21118	0.00742942	0.277778	query_1	['GO:0030154', 'GO:0048066']
684	GO:BP	GO:0045765	regulation of angiogenesis	0.165261	FALSE	"Any process that modulates the frequency, rate or extent of angiogenesis." [GOC:go_curators]	305	1346	38	21118	0.0282318	0.12459	query_1	['GO:0001525', 'GO:0022603', 'GO:1901342']
685	GO:BP	GO:0045927	positive regulation of growth	0.166011	FALSE	"Any process that activates or increases the rate or extent of growth, the increase in size or mass of all or part of an organism." [GOC:go_curators]	294	1346	37	21118	0.0274889	0.12585	query_1	['GO:0040007', 'GO:0040008', 'GO:0048518']
686	GO:BP	GO:0001841	neural tube formation	0.168908	FALSE	"The formation of a tube from the flat layer of ectodermal cells known as the neural plate. This will give rise to the central nervous system." [GOC:dph, ISBN:0878932437]	119	1346	20	21118	0.0148588	0.168067	query_1	['GO:0001838', 'GO:0021915']
687	GO:BP	GO:0044772	mitotic cell cycle phase transition	0.169211	FALSE	"The cell cycle process by which a cell commits to entering the next mitotic cell cycle phase." [GOC:mtg_cell_cycle]	373	1346	44	21118	0.0326895	0.117962	query_1	['GO:0044770', 'GO:1903047']
688	GO:BP	GO:0044843	cell cycle G1/S phase transition	0.17006	FALSE	"The cell cycle process by which a cell in G1 phase commits to S phase." [GOC:mtg_cell_cycle]	198	1346	28	21118	0.0208024	0.141414	query_1	['GO:0044770']
689	GO:BP	GO:0034329	cell junction assembly	0.171009	FALSE	"A cellular process that results in the aggregation, arrangement and bonding together of a set of components to form a cell junction." [GOC:mah]	431	1346	49	21118	0.0364042	0.113689	query_1	['GO:0022607', 'GO:0034330']
690	GO:BP	GO:0044770	cell cycle phase transition	0.176415	FALSE	"The cell cycle process by which a cell commits to entering the next cell cycle phase." [GOC:mtg_cell_cycle]	455	1346	51	21118	0.03789	0.112088	query_1	['GO:0022402']
691	GO:BP	GO:0010564	regulation of cell cycle process	0.176469	FALSE	"Any process that modulates a cellular process that is involved in the progression of biochemical and morphological phases and events that occur in a cell during successive cell replication or nuclear replication events." [GOC:dph, GOC:tb]	599	1346	63	21118	0.0468053	0.105175	query_1	['GO:0022402', 'GO:0051726']
692	GO:BP	GO:0007179	transforming growth factor beta receptor signaling pathway	0.177443	FALSE	"A series of molecular signals initiated by the binding of an extracellular ligand to a transforming growth factor beta receptor on the surface of a target cell, and ending with regulation of a downstream cellular process, e.g. transcription." [GOC:BHF, GOC:mah, GOC:signaling]	178	1346	26	21118	0.0193165	0.146067	query_1	['GO:0007178', 'GO:0071560']
693	GO:BP	GO:0007405	neuroblast proliferation	0.190954	FALSE	"The expansion of a neuroblast population by cell division. A neuroblast is any cell that will divide and give rise to a neuron." [GOC:ai, GOC:mtg_sensu, GOC:sart]	67	1346	14	21118	0.0104012	0.208955	query_1	['GO:0048699', 'GO:0061351']
694	GO:BP	GO:0051851	modulation by host of symbiont process	0.19306	FALSE	"The process in which an organism effects a change in the structure or processes of a symbiont organism. The symbiont is defined as the smaller of the organisms involved in a symbiotic interaction." [GOC:cc]	59	1346	13	21118	0.00965825	0.220339	query_1	['GO:0051702', 'GO:0051817']
695	GO:BP	GO:0036293	response to decreased oxygen levels	0.194348	FALSE	"Any process that results in a change in state or activity of a cell or an organism (in terms of movement, secretion, enzyme production, gene expression, etc.) as a result of a stimulus reflecting a decline in the level of oxygen." [GOC:al]	341	1346	41	21118	0.0304606	0.120235	query_1	['GO:0070482']
696	GO:BP	GO:0061311	cell surface receptor signaling pathway involved in heart development	0.197661	FALSE	"Any series of molecular signals initiated by the binding of a receptor on the surface of a cell to a physiological ligand, which contributes to the progression of the heart over time." [GOC:dph, GOC:mtg_heart, GOC:signaling]	30	1346	9	21118	0.00668648	0.3	query_1	['GO:0007166', 'GO:0007507']
697	GO:BP	GO:0060740	prostate gland epithelium morphogenesis	0.197661	FALSE	"The process in which the anatomical structures of epithelia of the prostate gland are generated and organized. An epithelium consists of closely packed cells arranged in one or more layers, that covers the outer surfaces of the body or lines any internal cavity or tube." [GOC:dph]	30	1346	9	21118	0.00668648	0.3	query_1	['GO:0002009', 'GO:0003006', 'GO:0060512']
698	GO:BP	GO:0031069	hair follicle morphogenesis	0.197661	FALSE	"The process in which the anatomical structures of the hair follicle are generated and organized." [GOC:ln]	30	1346	9	21118	0.00668648	0.3	query_1	['GO:0001942', 'GO:0009653', 'GO:0022405', 'GO:0048730']
699	GO:BP	GO:0045445	myoblast differentiation	0.201485	FALSE	"The process in which a relatively unspecialized cell acquires specialized features of a myoblast. A myoblast is a mononucleate cell type that, by fusion with other myoblasts, gives rise to the myotubes that eventually develop into striated muscle fibers." [CL:0000056, GOC:go_curators, GOC:mtg_muscle]	93	1346	17	21118	0.01263	0.182796	query_1	['GO:0030154', 'GO:0061061']
700	GO:BP	GO:0014909	smooth muscle cell migration	0.202123	FALSE	"The orderly movement of a smooth muscle cell from one site to another, often during the development of a multicellular organism." [CL:0000192, GOC:mtg_muscle]	102	1346	18	21118	0.013373	0.176471	query_1	['GO:0014812']
701	GO:BP	GO:0050670	regulation of lymphocyte proliferation	0.20436	FALSE	"Any process that modulates the frequency, rate or extent of lymphocyte proliferation." [GOC:ai]	221	1346	30	21118	0.0222883	0.135747	query_1	['GO:0032944', 'GO:0046651', 'GO:0051249']
702	GO:BP	GO:1902532	negative regulation of intracellular signal transduction	0.213404	FALSE	"Any process that stops, prevents or reduces the frequency, rate or extent of intracellular signal transduction." [GOC:dph, GOC:signaling, GOC:tb, GOC:TermGenie]	518	1346	56	21118	0.0416048	0.108108	query_1	['GO:0009968', 'GO:0035556', 'GO:1902531']
703	GO:BP	GO:0003207	cardiac chamber formation	0.214087	FALSE	"The developmental process pertaining to the initial formation of a cardiac chamber from unspecified parts. A cardiac chamber is an enclosed cavity within the heart." [GOC:mtg_heart]	13	1346	6	21118	0.00445765	0.461538	query_1	['GO:0003206', 'GO:0048646']
704	GO:BP	GO:0035733	hepatic stellate cell activation	0.214087	FALSE	"A change in the morphology or behavior of a hepatic stellate cell resulting from exposure to a cytokine, chemokine, hormone, cellular ligand or soluble factor." [CL:0000632, GOC:bf]	13	1346	6	21118	0.00445765	0.461538	query_1	['GO:0072537']
705	GO:BP	GO:0014897	striated muscle hypertrophy	0.215035	FALSE	"The enlargement or overgrowth of all or part of an organ due to an increase in size of muscle cells without cell division. In the case of striated muscle, this happens due to the additional synthesis of sarcomeric proteins and assembly of myofibrils." [GOC:mtg_muscle]	121	1346	20	21118	0.0148588	0.165289	query_1	['GO:0014896']
706	GO:BP	GO:0014878	response to electrical stimulus involved in regulation of muscle adaptation	0.21665	FALSE	"Any process that results in a change in state or activity of a cell or an organism (in terms of movement, secretion, enzyme production, gene expression, etc.) as a result of an electrical stimulus. This process occurs as part of the regulation of muscle adaptation." [GOC:ef, GOC:mtg_muscle]	5	1346	4	21118	0.00297177	0.8	query_1	['GO:0014874', 'GO:0051602']
707	GO:BP	GO:0048752	semicircular canal morphogenesis	0.21665	FALSE	"The process in which the anatomical structures of the semicircular canals are generated and organized." [GOC:dgh, GOC:dph, GOC:jid]	5	1346	4	21118	0.00297177	0.8	query_1	['GO:0035239', 'GO:0042472', 'GO:0048598', 'GO:0060872']
708	GO:BP	GO:0060563	neuroepithelial cell differentiation	0.216907	FALSE	"The process in which epiblast cells acquire specialized features of neuroepithelial cells." [GOC:dph, GOC:tb]	24	1346	8	21118	0.00594354	0.333333	query_1	['GO:0002065']
709	GO:BP	GO:0006979	response to oxidative stress	0.21837	FALSE	"Any process that results in a change in state or activity of a cell or an organism (in terms of movement, secretion, enzyme production, gene expression, etc.) as a result of oxidative stress, a state often resulting from exposure to high levels of reactive oxygen species, e.g. superoxide anions, hydrogen peroxide (H2O2), and hydroxyl radicals." [GOC:jl, PMID:12115731]	447	1346	50	21118	0.0371471	0.111857	query_1	['GO:0006950']
710	GO:BP	GO:0060348	bone development	0.222182	FALSE	"The process whose specific outcome is the progression of bone over time, from its formation to the mature structure. Bone is the hard skeletal connective tissue consisting of both mineral and cellular components." [GOC:dph]	222	1346	30	21118	0.0222883	0.135135	query_1	['GO:0001501', 'GO:0048513']
711	GO:BP	GO:0099177	regulation of trans-synaptic signaling	0.22456	FALSE	"Any process that modulates the frequency, rate or extent of trans-synaptic signaling." [GOC:dos]	495	1346	54	21118	0.0401189	0.109091	query_1	['GO:0010646', 'GO:0023051', 'GO:0099537']
712	GO:BP	GO:0009791	post-embryonic development	0.224594	FALSE	"The process whose specific outcome is the progression of the organism over time, from the completion of embryonic development to the mature structure. See embryonic development." [GOC:go_curators]	112	1346	19	21118	0.0141159	0.169643	query_1	['GO:0007275', 'GO:0032501']
713	GO:BP	GO:2000177	regulation of neural precursor cell proliferation	0.224594	FALSE	"Any process that modulates the frequency, rate or extent of neural precursor cell proliferation." [GOC:dph, GOC:yaf]	112	1346	19	21118	0.0141159	0.169643	query_1	['GO:0042127', 'GO:0061351']
714	GO:BP	GO:0044092	negative regulation of molecular function	0.226124	FALSE	"Any process that stops or reduces the rate or extent of a molecular function, an elemental biological activity occurring at the molecular level, such as catalysis or binding." [GO:jl]	1166	1346	107	21118	0.0794948	0.0917667	query_1	['GO:0065009']
715	GO:BP	GO:0010611	regulation of cardiac muscle hypertrophy	0.226198	FALSE	"Any process that modulates the rate, frequency or extent of the enlargement or overgrowth of all or part of the heart due to an increase in size (not length) of individual cardiac muscle fibers, without cell division." [GOC:dph, GOC:tb]	85	1346	16	21118	0.0118871	0.188235	query_1	['GO:0003300', 'GO:0014743', 'GO:0043502']
716	GO:BP	GO:0002088	lens development in camera-type eye	0.226198	FALSE	"The process whose specific outcome is the progression of the lens over time, from its formation to the mature structure. The lens is a transparent structure in the eye through which light is focused onto the retina. An example of this process is found in Mus musculus." [GOC:dph, ISBN:0582064333]	85	1346	16	21118	0.0118871	0.188235	query_1	['GO:0043010', 'GO:0048856']
717	GO:BP	GO:0071347	cellular response to interleukin-1	0.230549	FALSE	"Any process that results in a change in state or activity of a cell (in terms of movement, secretion, enzyme production, gene expression, etc.) as a result of an interleukin-1 stimulus." [GOC:mah]	103	1346	18	21118	0.013373	0.174757	query_1	['GO:0070555', 'GO:0071345']
718	GO:BP	GO:0035924	cellular response to vascular endothelial growth factor stimulus	0.232228	FALSE	"Any process that results in a change in state or activity of a cell (in terms of movement, secretion, enzyme production, gene expression, etc.) as a result of a vascular endothelial growth factor stimulus." [GOC:BHF, GOC:rl, PMID:18440775]	60	1346	13	21118	0.00965825	0.216667	query_1	['GO:0071363']
719	GO:BP	GO:0048008	platelet-derived growth factor receptor signaling pathway	0.232228	FALSE	"The series of molecular signals generated as a consequence of a platelet-derived growth factor receptor binding to one of its physiological ligands." [GOC:ceb]	60	1346	13	21118	0.00965825	0.216667	query_1	['GO:0007169']
720	GO:BP	GO:1901342	regulation of vasculature development	0.234251	FALSE	"Any process that modulates the frequency, rate or extent of vasculature development." [GOC:TermGenie]	310	1346	38	21118	0.0282318	0.122581	query_1	['GO:0001944', 'GO:2000026']
721	GO:BP	GO:0007346	regulation of mitotic cell cycle	0.237995	FALSE	"Any process that modulates the rate or extent of progress through the mitotic cell cycle." [GOC:dph, GOC:go_curators, GOC:tb]	425	1346	48	21118	0.0356612	0.112941	query_1	['GO:0000278', 'GO:0051726']
722	GO:BP	GO:0051046	regulation of secretion	0.244946	FALSE	"Any process that modulates the frequency, rate or extent of the controlled release of a substance from a cell or a tissue." [GOC:ai]	730	1346	73	21118	0.0542348	0.1	query_1	['GO:0046903', 'GO:0051049']
723	GO:BP	GO:0070482	response to oxygen levels	0.253829	FALSE	"Any process that results in a change in state or activity of a cell or an organism (in terms of movement, secretion, enzyme production, gene expression, etc.) as a result of a stimulus reflecting the presence, absence, or concentration of oxygen." [GOC:BHF, GOC:mah]	368	1346	43	21118	0.0319465	0.116848	query_1	['GO:0009628']
724	GO:BP	GO:1903530	regulation of secretion by cell	0.258899	FALSE	"Any process that modulates the frequency, rate or extent of secretion by cell." [GO_REF:0000058, GOC:pm, GOC:TermGenie, PMID:12130530]	644	1346	66	21118	0.0490342	0.102484	query_1	['GO:0032940', 'GO:0050794', 'GO:0051046']
725	GO:BP	GO:0042060	wound healing	0.26124	FALSE	"The series of events that restore integrity to a damaged tissue, following an injury." [GOC:bf, PMID:15269788]	380	1346	44	21118	0.0326895	0.115789	query_1	['GO:0009611']
726	GO:BP	GO:0050672	negative regulation of lymphocyte proliferation	0.26168	FALSE	"Any process that stops, prevents or reduces the rate or extent of lymphocyte proliferation." [GOC:ai]	86	1346	16	21118	0.0118871	0.186047	query_1	['GO:0032945', 'GO:0046651', 'GO:0050670', 'GO:0051250']
727	GO:BP	GO:0060395	SMAD protein signal transduction	0.26168	FALSE	"The cascade of processes by which a signal interacts with a receptor, causing a change in the activity of a SMAD protein, and ultimately effecting a change in the functioning of the cell." [GOC:BHF, GOC:dph, GOC:tb]	86	1346	16	21118	0.0118871	0.186047	query_1	['GO:0007165', 'GO:0007178']
728	GO:BP	GO:0032944	regulation of mononuclear cell proliferation	0.26208	FALSE	"Any process that modulates the frequency, rate or extent of mononuclear cell proliferation." [GOC:add]	224	1346	30	21118	0.0222883	0.133929	query_1	['GO:0032943', 'GO:0070663']
729	GO:BP	GO:0060914	heart formation	0.262854	FALSE	"The developmental process pertaining to the initial formation of the heart from unspecified parts. This process begins with the specific processes that contribute to the appearance of the heart field and the arrival of cardiac neural crest to the heart region. The process ends when the structural rudiment is recognizable." [GOC:mtg_heart]	31	1346	9	21118	0.00668648	0.290323	query_1	['GO:0003007', 'GO:0048645']
730	GO:BP	GO:0060512	prostate gland morphogenesis	0.262854	FALSE	"The process in which the anatomical structures of a prostate gland are generated and organized." [GOC:dph, PMID:18977204]	31	1346	9	21118	0.00668648	0.290323	query_1	['GO:0003006', 'GO:0022612', 'GO:0030850']
731	GO:BP	GO:0048013	ephrin receptor signaling pathway	0.271049	FALSE	"The series of molecular signals generated as a consequence of an ephrin receptor binding to an ephrin." [GOC:ceb]	38	1346	10	21118	0.00742942	0.263158	query_1	['GO:0007169']
732	GO:BP	GO:0014896	muscle hypertrophy	0.272004	FALSE	"The muscle system process that results in enlargement or overgrowth of all or part of a muscle organ due to an increase in the size of its muscle cells. Physiological hypertrophy is a normal process during development (it stops in cardiac muscle after adolescence) and can also be brought on in response to demand. In athletes cardiac and skeletal muscles undergo hypertrophy stimulated by increasi…	123	1346	20	21118	0.0148588	0.162602	query_1	['GO:0003012']
733	GO:BP	GO:0003015	heart process	0.273198	FALSE	"A circulatory system process carried out by the heart. The heart is a hollow, muscular organ, which, by contracting rhythmically, keeps up the circulation of the blood. The heart is a hollow, muscular organ, which, by contracting rhythmically, keeps up the circulation of the blood." [GOC:mtg_cardio]	246	1346	32	21118	0.0237741	0.130081	query_1	['GO:0003013']
734	GO:BP	GO:0046632	alpha-beta T cell differentiation	0.287002	FALSE	"The process in which a precursor cell type acquires the specialized features of an alpha-beta T cell. An alpha-beta T cell is a T cell that expresses an alpha-beta T cell receptor complex." [CL:0000789, GOC:ai]	114	1346	19	21118	0.0141159	0.166667	query_1	['GO:0030217', 'GO:0046631']
735	GO:BP	GO:0060047	heart contraction	0.290754	FALSE	"The multicellular organismal process in which the heart decreases in volume in a characteristic way to propel blood through the body." [GOC:dph]	236	1346	31	21118	0.0230312	0.131356	query_1	['GO:0003015', 'GO:0008015']
736	GO:BP	GO:0099537	trans-synaptic signaling	0.29195	FALSE	"Cell-cell signaling in either direction across the synaptic cleft." [GOC:dos]	709	1346	71	21118	0.0527489	0.100141	query_1	['GO:0099536']
737	GO:BP	GO:2000489	regulation of hepatic stellate cell activation	0.294281	FALSE	"Any process that modulates the frequency, rate or extent of hepatic stellate cell activation." [GOC:obol]	9	1346	5	21118	0.00371471	0.555556	query_1	['GO:0035733', 'GO:0050865']
738	GO:BP	GO:0097193	intrinsic apoptotic signaling pathway	0.295185	FALSE	"A series of molecular signals in which an intracellular signal is conveyed to trigger the apoptotic death of a cell. The pathway starts with reception of an intracellular signal (e.g. DNA damage, endoplasmic reticulum stress, oxidative stress etc.), and ends when the execution phase of apoptosis is triggered. The intrinsic apoptotic signaling pathway is crucially regulated by permeabilization of…	291	1346	36	21118	0.0267459	0.123711	query_1	['GO:0035556', 'GO:0097190']
739	GO:BP	GO:0003272	endocardial cushion formation	0.301229	FALSE	"The developmental process pertaining to the initial formation of an endocardial cushion. The endocardial cushion is a specialized region of mesenchymal cells that will give rise to the heart septa and valves." [GOC:mtg_heart, PMID:15797462]	25	1346	8	21118	0.00594354	0.32	query_1	['GO:0003203', 'GO:0048646']
740	GO:BP	GO:0032945	negative regulation of mononuclear cell proliferation	0.301941	FALSE	"Any process that stops, prevents, or reduces the frequency, rate or extent of mononuclear cell proliferation." [GOC:add]	87	1346	16	21118	0.0118871	0.183908	query_1	['GO:0032943', 'GO:0032944', 'GO:0070664']
741	GO:BP	GO:1904062	regulation of cation transmembrane transport	0.305278	FALSE	"Any process that modulates the frequency, rate or extent of cation transmembrane transport." [GO_REF:0000058, GOC:TermGenie, PMID:15304482]	371	1346	43	21118	0.0319465	0.115903	query_1	['GO:0034765', 'GO:0098655']
742	GO:BP	GO:1901617	organic hydroxy compound biosynthetic process	0.308303	FALSE	"The chemical reactions and pathways resulting in the formation of organic hydroxy compound." [GOC:pr, GOC:TermGenie]	226	1346	30	21118	0.0222883	0.132743	query_1	['GO:1901576', 'GO:1901615']
743	GO:BP	GO:0043616	keratinocyte proliferation	0.315851	FALSE	"The multiplication or reproduction of keratinocytes, resulting in the expansion of a cell population. Keratinocytes are epidermal cells which synthesize keratin and undergo a characteristic change as they move upward from the basal layers of the epidermis to the cornified (horny) layer of the skin." [CL:0000311]	46	1346	11	21118	0.00817236	0.23913	query_1	['GO:0050673']
744	GO:BP	GO:1902105	regulation of leukocyte differentiation	0.316516	FALSE	"Any process that modulates the frequency, rate or extent of leukocyte differentiation." [GOC:add, GOC:TermGenie]	292	1346	36	21118	0.0267459	0.123288	query_1	['GO:0002521', 'GO:0045595', 'GO:1903706']
745	GO:BP	GO:0002040	sprouting angiogenesis	0.317398	FALSE	"The extension of new blood vessels from existing vessels into avascular tissues, this process includes the specialization of endothelial cells into leading tip and stalk cells, proliferation and migration of the endothelial cells and cell adhesion resulting in angiogenic sprout fusion or lumen formation." [PMID:16391003, PMID:23031691]	134	1346	21	21118	0.0156018	0.156716	query_1	['GO:0001525']
746	GO:BP	GO:0034599	cellular response to oxidative stress	0.319375	FALSE	"Any process that results in a change in state or activity of a cell (in terms of movement, secretion, enzyme production, gene expression, etc.) as a result of oxidative stress, a state often resulting from exposure to high levels of reactive oxygen species, e.g. superoxide anions, hydrogen peroxide (H2O2), and hydroxyl radicals." [GOC:mah]	281	1346	35	21118	0.026003	0.124555	query_1	['GO:0006979', 'GO:0062197']
747	GO:BP	GO:1990830	cellular response to leukemia inhibitory factor	0.323592	FALSE	"Any process that results in a change in state or activity of a cell (in terms of movement, secretion, enzyme production, gene expression, etc.) as a result of a leukemia inhibitory factor stimulus." [PMID:12801913]	115	1346	19	21118	0.0141159	0.165217	query_1	['GO:0071345', 'GO:1990823']
748	GO:BP	GO:0014812	muscle cell migration	0.323592	FALSE	"The orderly movement of a muscle cell from one site to another, often during the development of a multicellular organism." [CL:0000187, GOC:mtg_muscle]	115	1346	19	21118	0.0141159	0.165217	query_1	['GO:0016477']
749	GO:BP	GO:0003006	developmental process involved in reproduction	0.334371	FALSE	"A developmental process in which a progressive change in the state of some part of an organism specifically contributes to its ability to form offspring." [GOC:dph, GOC:isa_complete]	1191	1346	108	21118	0.0802377	0.0906801	query_1	['GO:0022414', 'GO:0032502']
750	GO:BP	GO:0003401	axis elongation	0.345153	FALSE	"The developmental growth that results in the elongation of a line that defines polarity or symmetry in an anatomical structure." [GOC:ascb_2009, GOC:dph, GOC:tb]	32	1346	9	21118	0.00668648	0.28125	query_1	['GO:0060560']
751	GO:BP	GO:0014743	regulation of muscle hypertrophy	0.347512	FALSE	"Any process that modulates the frequency, rate or extent of muscle hypertrophy." [GOC:mtg_muscle]	88	1346	16	21118	0.0118871	0.181818	query_1	['GO:0014896', 'GO:0090257']
752	GO:BP	GO:0043086	negative regulation of catalytic activity	0.351968	FALSE	"Any process that stops or reduces the activity of an enzyme." [GOC:ebc, GOC:jl, GOC:tb, GOC:vw]	802	1346	78	21118	0.0579495	0.0972569	query_1	['GO:0044092', 'GO:0050790']
753	GO:BP	GO:0072498	embryonic skeletal joint development	0.35444	FALSE	"The process, occurring during the embryonic phase, whose specific outcome is the progression of the skeletal joints over time, from formation to mature structure." [GOC:BHF, GOC:vk]	14	1346	6	21118	0.00445765	0.428571	query_1	['GO:0048706']
754	GO:BP	GO:0006978	DNA damage response, signal transduction by p53 class mediator resulting in transcription of p21 class mediator	0.35444	FALSE	"A cascade of processes induced by the cell cycle regulator phosphoprotein p53, or an equivalent protein, resulting in the induction of the transcription of p21 (also known as WAF1, CIP1 and SDI1) or any equivalent protein, in response to the detection of DNA damage." [PMID:10967424]	14	1346	6	21118	0.00445765	0.428571	query_1	['GO:0030330', 'GO:0042772']
755	GO:BP	GO:0098916	anterograde trans-synaptic signaling	0.354821	FALSE	"Cell-cell signaling from pre to post-synapse, across the synaptic cleft." [GOC:dos]	701	1346	70	21118	0.0520059	0.0998573	query_1	['GO:0099537']
756	GO:BP	GO:0007268	chemical synaptic transmission	0.354821	FALSE	"The vesicular release of classical neurotransmitter molecules from a presynapse, across a chemical synapse, the subsequent activation of neurotransmitter receptors at the postsynapse of a target cell (neuron, muscle, or secretory cell) and the effects of this activation on the postsynaptic membrane potential and ionic composition of the postsynaptic cytosol. This process encompasses both spontan…	701	1346	70	21118	0.0520059	0.0998573	query_1	['GO:0098916']
757	GO:BP	GO:1903034	regulation of response to wounding	0.356775	FALSE	"Any process that modulates the frequency, rate or extent of response to wounding." [GO_REF:0000058, GOC:kmv, GOC:TermGenie, pmid:19164535]	165	1346	24	21118	0.0178306	0.145455	query_1	['GO:0009611', 'GO:0080134']
758	GO:BP	GO:1990823	response to leukemia inhibitory factor	0.364232	FALSE	"Any process that results in a change in state or activity of a cell or an organism (in terms of movement, secretion, enzyme production, gene expression, etc.) as a result of a leukemia inhibitory factor stimulus." [PMID:12801913]	116	1346	19	21118	0.0141159	0.163793	query_1	['GO:0034097']
759	GO:BP	GO:0023061	signal release	0.366388	FALSE	"The process in which a signal is secreted or discharged into the extracellular medium from a cellular source." [GOC:mtg_signal]	553	1346	58	21118	0.0430906	0.104882	query_1	['GO:0007267', 'GO:0032940']
760	GO:BP	GO:0048588	developmental cell growth	0.371561	FALSE	"The growth of a cell, where growth contributes to the progression of the cell over time from one condition to another." [GOC:go_curators, GOC:isa_complete]	261	1346	33	21118	0.0245171	0.126437	query_1	['GO:0016049', 'GO:0048468', 'GO:0048589']
761	GO:BP	GO:0099536	synaptic signaling	0.373338	FALSE	"Cell-cell signaling to, from or within a synapse." [GOC:dos]	740	1346	73	21118	0.0542348	0.0986486	query_1	['GO:0007267']
762	GO:BP	GO:0034504	protein localization to nucleus	0.382511	FALSE	"A process in which a protein transports or maintains the localization of another protein to the nucleus." [GOC:ecd]	306	1346	37	21118	0.0274889	0.120915	query_1	['GO:0033365']
763	GO:BP	GO:0031532	actin cytoskeleton reorganization	0.382627	FALSE	"A process that is carried out at the cellular level which results in dynamic structural changes to the arrangement of constituent parts of cytoskeletal structures comprising actin filaments and their associated proteins." [GOC:ecd, GOC:mah]	107	1346	18	21118	0.013373	0.168224	query_1	['GO:0030036']
764	GO:BP	GO:0000082	G1/S transition of mitotic cell cycle	0.383452	FALSE	"The mitotic cell cycle transition by which a cell in G1 commits to S phase. The process begins with the build up of G1 cyclin-dependent kinase (G1 CDK), resulting in the activation of transcription of G1 cyclins. The process ends with the positive feedback of the G1 cyclins on the G1 CDK which commits the cell to S phase, in which DNA replication is initiated." [GOC:mtg_cell_cycle]	176	1346	25	21118	0.0185736	0.142045	query_1	['GO:0044772', 'GO:0044843']
765	GO:BP	GO:0008016	regulation of heart contraction	0.389867	FALSE	"Any process that modulates the frequency, rate or extent of heart contraction. Heart contraction is the process in which the heart decreases in volume in a characteristic way to propel blood through the body." [GOC:dph, GOC:go_curators, GOC:tb]	197	1346	27	21118	0.0200594	0.137056	query_1	['GO:0060047', 'GO:1903522']
766	GO:BP	GO:0050680	negative regulation of epithelial cell proliferation	0.393596	FALSE	"Any process that stops, prevents or reduces the rate or extent of epithelial cell proliferation." [GOC:ai]	136	1346	21	21118	0.0156018	0.154412	query_1	['GO:0008285', 'GO:0050673', 'GO:0050678']
767	GO:BP	GO:1902305	regulation of sodium ion transmembrane transport	0.393684	FALSE	"Any process that modulates the frequency, rate or extent of sodium ion transmembrane transport." [GOC:BHF, GOC:mtg_cardiac_conduct_nov11, GOC:rl, GOC:TermGenie, PMID:18591664]	63	1346	13	21118	0.00965825	0.206349	query_1	['GO:0002028', 'GO:0035725', 'GO:1904062']
768	GO:BP	GO:0043535	regulation of blood vessel endothelial cell migration	0.395043	FALSE	"Any process that modulates the frequency, rate or extent of the migration of the endothelial cells of blood vessels." [GOC:go_curators]	98	1346	17	21118	0.01263	0.173469	query_1	['GO:0010594', 'GO:0043534']
769	GO:BP	GO:0030509	BMP signaling pathway	0.397595	FALSE	"A series of molecular signals initiated by the binding of a member of the BMP (bone morphogenetic protein) family to a receptor on the surface of a target cell, and ending with regulation of a downstream cellular process, e.g. transcription." [GOC:signaling, ISBN:0878932437, PMID:17428827]	156	1346	23	21118	0.0170877	0.147436	query_1	['GO:0007178', 'GO:0071773']
770	GO:BP	GO:0050804	modulation of chemical synaptic transmission	0.398742	FALSE	"Any process that modulates the frequency or amplitude of synaptic transmission, the process of communication from a neuron to a target (neuron, muscle, or secretory cell) across a synapse. Amplitude, in this case, refers to the change in postsynaptic membrane potential due to a single instance of synaptic transmission." [GOC:ai]	494	1346	53	21118	0.0393759	0.107287	query_1	['GO:0007268', 'GO:0099177']
771	GO:BP	GO:0003170	heart valve development	0.402659	FALSE	"The progression of a heart valve over time, from its formation to the mature structure. A heart valve is a structure that restricts the flow of blood to different regions of the heart and forms from an endocardial cushion." [GOC:mtg_heart]	55	1346	12	21118	0.0089153	0.218182	query_1	['GO:0007507', 'GO:0048856']
772	GO:BP	GO:0007584	response to nutrient	0.406045	FALSE	"Any process that results in a change in state or activity of a cell or an organism (in terms of movement, secretion, enzyme production, gene expression, etc.) as a result of a nutrient stimulus." [GOC:go_curators]	187	1346	26	21118	0.0193165	0.139037	query_1	['GO:0031667', 'GO:0042221']
773	GO:BP	GO:0045785	positive regulation of cell adhesion	0.413672	FALSE	"Any process that activates or increases the frequency, rate or extent of cell adhesion." [GOC:go_curators]	423	1346	47	21118	0.0349183	0.111111	query_1	['GO:0007155', 'GO:0030155', 'GO:0048522']
774	GO:BP	GO:0048469	cell maturation	0.424574	FALSE	"A developmental process, independent of morphogenetic (shape) change, that is required for a cell to attain its fully functional state." [GOC:go_curators]	198	1346	27	21118	0.0200594	0.136364	query_1	['GO:0048468', 'GO:0048869', 'GO:0071695']
775	GO:BP	GO:0006606	protein import into nucleus	0.431048	FALSE	"The directed movement of a protein from the cytoplasm to the nucleus." [GOC:jl]	167	1346	24	21118	0.0178306	0.143713	query_1	['GO:0006886', 'GO:0017038', 'GO:0034504', 'GO:0051170', 'GO:0072594']
776	GO:BP	GO:0010660	regulation of muscle cell apoptotic process	0.432238	FALSE	"Any process that modulates the rate or frequency of muscle cell apoptotic process, a form of programmed cell death induced by external or internal signals that trigger the activity of proteolytic caspases whose actions dismantle a muscle cell and result in its death." [GOC:dph, GOC:mtg_apoptosis, GOC:tb]	108	1346	18	21118	0.013373	0.166667	query_1	['GO:0010657', 'GO:0042981']
777	GO:BP	GO:0048663	neuron fate commitment	0.432627	FALSE	"The process in which the developmental fate of a cell becomes restricted such that it will develop into a neuron." [GOC:dph]	72	1346	14	21118	0.0104012	0.194444	query_1	['GO:0030182', 'GO:0045165']
778	GO:BP	GO:0048557	embryonic digestive tract morphogenesis	0.433493	FALSE	"The process in which the anatomical structures of the digestive tract are generated and organized during embryonic development. The digestive tract is the anatomical structure through which food passes and is processed." [GOC:go_curators]	20	1346	7	21118	0.00520059	0.35	query_1	['GO:0048546', 'GO:0048562', 'GO:0048566']
779	GO:BP	GO:0021700	developmental maturation	0.436823	FALSE	"A developmental process, independent of morphogenetic (shape) change, that is required for an anatomical structure, cell or cellular component to attain its fully functional state." [GO_REF:0000021, GOC:cls, GOC:dgh, GOC:dph, GOC:jid]	308	1346	37	21118	0.0274889	0.12013	query_1	['GO:0032502']
780	GO:BP	GO:0043516	regulation of DNA damage response, signal transduction by p53 class mediator	0.447926	FALSE	"Any process that modulates the frequency, rate or extent of the cascade of processes induced by the cell cycle regulator phosphoprotein p53, or an equivalent protein, in response to the detection of DNA damage." [GOC:jl]	33	1346	9	21118	0.00668648	0.272727	query_1	['GO:0030330', 'GO:1901796', 'GO:2001020']
781	GO:BP	GO:0061036	positive regulation of cartilage development	0.447926	FALSE	"Any process that increases the rate, frequency, or extent of cartilage development, the process whose specific outcome is the progression of the cartilage over time, from its formation to the mature structure. Cartilage is a connective tissue dominated by extracellular matrix containing collagen type II and large amounts of proteoglycan, particularly chondroitin sulfate." [GOC:dph]	33	1346	9	21118	0.00668648	0.272727	query_1	['GO:0051094', 'GO:0051216', 'GO:0051240', 'GO:0061035']
782	GO:BP	GO:0010165	response to X-ray	0.447926	FALSE	"Any process that results in a change in state or activity of a cell or an organism (in terms of movement, secretion, enzyme production, gene expression, etc.) as a result of X-ray radiation. An X-ray is a form of electromagnetic radiation with a wavelength in the range of 10 nanometers to 100 picometers (corresponding to frequencies in the range 30 PHz to 3 EHz)." [GOC:sm, Wikipedia:X-ray]	33	1346	9	21118	0.00668648	0.272727	query_1	['GO:0010212']
783	GO:BP	GO:0042310	vasoconstriction	0.449059	FALSE	"A decrease in the diameter of blood vessels, especially arteries, due to constriction of smooth muscle cells that line the vessels, and usually causing an increase in blood pressure." [GOC:pr, ISBN:0192800752]	99	1346	17	21118	0.01263	0.171717	query_1	['GO:0097746']
784	GO:BP	GO:0055013	cardiac muscle cell development	0.456952	FALSE	"The process whose specific outcome is the progression of a cardiac muscle cell over time, from its formation to the mature state." [GOC:devbiol, GOC:mtg_heart]	90	1346	16	21118	0.0118871	0.177778	query_1	['GO:0055001', 'GO:0055006', 'GO:0055007']
785	GO:BP	GO:0051702	biological process involved in interaction with symbiont	0.456952	FALSE	"An interaction between two organisms living together in more or less intimate association. The term symbiont is used for the smaller (macro) of the two members of a symbiosis; the various forms of symbiosis include parasitism, commensalism and mutualism." [GOC:cc]	90	1346	16	21118	0.0118871	0.177778	query_1	['GO:0044403']
786	GO:BP	GO:0045619	regulation of lymphocyte differentiation	0.459658	FALSE	"Any process that modulates the frequency, rate or extent of lymphocyte differentiation." [GOC:go_curators]	178	1346	25	21118	0.0185736	0.140449	query_1	['GO:0030098', 'GO:0051249', 'GO:1902105']
787	GO:BP	GO:0062197	cellular response to chemical stress	0.472169	FALSE	"Any process that results in a change in state or activity of a cell (in terms of movement, secretion, enzyme production, gene expression, etc.) as a result of a chemical stimulus indicating the organism is under stress." [PMID:26653712]	332	1346	39	21118	0.0289747	0.11747	query_1	['GO:0033554', 'GO:0070887']
788	GO:BP	GO:0010862	positive regulation of pathway-restricted SMAD protein phosphorylation	0.475665	FALSE	"Any process that increases the rate, frequency or extent of pathway-restricted SMAD protein phosphorylation. Pathway-restricted SMAD proteins and common-partner SMAD proteins are involved in the transforming growth factor beta receptor signaling pathways." [GOC:dph, GOC:tb]	48	1346	11	21118	0.00817236	0.229167	query_1	['GO:0001934', 'GO:0060389', 'GO:0060393', 'GO:0090100']
789	GO:BP	GO:0009913	epidermal cell differentiation	0.476565	FALSE	"The process in which a relatively unspecialized cell acquires specialized features of an epidermal cell, any of the cells making up the epidermis." [GOC:dph, GOC:go_curators, GOC:mtg_sensu, GOC:sdb_2009, GOC:tb]	210	1346	28	21118	0.0208024	0.133333	query_1	['GO:0008544', 'GO:0030855']
790	GO:BP	GO:0016126	sterol biosynthetic process	0.483083	FALSE	"The chemical reactions and pathways resulting in the formation of sterols, steroids with one or more hydroxyl groups and a hydrocarbon side-chain in the molecule." [GOC:go_curators]	56	1346	12	21118	0.0089153	0.214286	query_1	['GO:0006694', 'GO:0016125', 'GO:1901617']
791	GO:BP	GO:0045580	regulation of T cell differentiation	0.487116	FALSE	"Any process that modulates the frequency, rate or extent of T cell differentiation." [GOC:go_curators]	148	1346	22	21118	0.0163447	0.148649	query_1	['GO:0030217', 'GO:0045619', 'GO:0050863']
792	GO:BP	GO:0007569	cell aging	0.487395	FALSE	"An aging process that has as participant a cell after a cell has stopped dividing. Cell aging may occur when a cell has temporarily stopped dividing through cell cycle arrest (GO:0007050) or when a cell has permanently stopped dividing, in which case it is undergoing cellular senescence (GO:0090398). May precede cell death (GO:0008219) and succeed cell maturation (GO:0048469)." [GOC:PO_curators]	109	1346	18	21118	0.013373	0.165138	query_1	['GO:0007568', 'GO:0048869']
793	GO:BP	GO:0071695	anatomical structure maturation	0.49806	FALSE	"A developmental process, independent of morphogenetic (shape) change, that is required for an anatomical structure to attain its fully functional state." [GOC:mah]	254	1346	32	21118	0.0237741	0.125984	query_1	['GO:0021700', 'GO:0048856']
794	GO:BP	GO:0031667	response to nutrient levels	0.505351	FALSE	"Any process that results in a change in state or activity of a cell or an organism (in terms of movement, secretion, enzyme production, gene expression, etc.) as a result of a stimulus reflecting the presence, absence, or concentration of nutrients." [GOC:mah]	523	1346	55	21118	0.0408618	0.105163	query_1	['GO:0009991']
795	GO:BP	GO:0009798	axis specification	0.521805	FALSE	"The establishment, maintenance and elaboration of a pattern along a line or around a point." [GOC:dph, GOC:go_curators, GOC:isa_complete]	82	1346	15	21118	0.0111441	0.182927	query_1	['GO:0007389']
796	GO:BP	GO:0050863	regulation of T cell activation	0.531348	FALSE	"Any process that modulates the frequency, rate or extent of T cell activation." [GOC:ai]	311	1346	37	21118	0.0274889	0.118971	query_1	['GO:0042110', 'GO:0051249']
797	GO:BP	GO:0030522	intracellular receptor signaling pathway	0.535954	FALSE	"Any series of molecular signals initiated by a ligand binding to an receptor located within a cell." [GOC:bf, GOC:mah]	244	1346	31	21118	0.0230312	0.127049	query_1	['GO:0007165']
798	GO:BP	GO:0034101	erythrocyte homeostasis	0.538205	FALSE	"Any process of regulating the production and elimination of erythrocytes within an organism." [GOC:add, PMID:10694114, PMID:14754397]	139	1346	21	21118	0.0156018	0.151079	query_1	['GO:0002262']
799	GO:BP	GO:0051154	negative regulation of striated muscle cell differentiation	0.539628	FALSE	"Any process that stops, prevents, or reduces the frequency, rate or extent of striated muscle cell differentiation." [CL:0000737, GOC:ai]	41	1346	10	21118	0.00742942	0.243902	query_1	['GO:0051146', 'GO:0051148', 'GO:0051153']
800	GO:BP	GO:0042221	response to chemical	0.543478	FALSE	"Any process that results in a change in state or activity of a cell or an organism (in terms of movement, secretion, enzyme production, gene expression, etc.) as a result of a chemical stimulus." [GOC:jl]	5544	1346	410	21118	0.304606	0.0739538	query_1	['GO:0050896']
801	GO:BP	GO:0099175	regulation of postsynapse organization	0.548613	FALSE	"Any process that modulates the physical form of a postsynapse." [GOC:ai, GOC:dph, GOC:tb]	110	1346	18	21118	0.013373	0.163636	query_1	['GO:0050807', 'GO:0099173']
802	GO:BP	GO:0060571	morphogenesis of an epithelial fold	0.551486	FALSE	"The morphogenetic process in which an epithelial sheet bends along a linear axis." [GOC:dph]	27	1346	8	21118	0.00594354	0.296296	query_1	['GO:0002009']
803	GO:BP	GO:0003266	regulation of secondary heart field cardioblast proliferation	0.557608	FALSE	"Any process that modulates the frequency, rate or extent of cardioblast proliferation in the second heart field. A cardioblast is a cardiac precursor cell. It is a cell that has been committed to a cardiac fate, but will undergo more cell division rather than terminally differentiating. The secondary heart field is the region of the heart that will form the majority of the mesodermal component o…	10	1346	5	21118	0.00371471	0.5	query_1	['GO:0003264']
804	GO:BP	GO:0072102	glomerulus morphogenesis	0.557608	FALSE	"The process in which the anatomical structures of the glomerulus are generated and organized. The glomerulus is a capillary tuft surrounded by Bowman's capsule in nephrons of the vertebrate kidney." [GOC:mtg_kidney_jan10]	10	1346	5	21118	0.00371471	0.5	query_1	['GO:0009653', 'GO:0032835']
805	GO:BP	GO:0003211	cardiac ventricle formation	0.557608	FALSE	"The developmental process pertaining to the initial formation of a cardiac ventricle from unspecified parts. A cardiac ventricle receives blood from a cardiac atrium and pumps it out of the heart." [GOC:mtg_heart]	10	1346	5	21118	0.00371471	0.5	query_1	['GO:0003207', 'GO:0003208']
806	GO:BP	GO:0060513	prostatic bud formation	0.557608	FALSE	"The morphogenetic process in which a region of the fetal urogenital sinus epithelium is specified to become the prostate, resulting in prostate bud outgrowth." [GOC:dph, PMID:18977204]	10	1346	5	21118	0.00371471	0.5	query_1	['GO:0016331', 'GO:0048645', 'GO:0060572', 'GO:0060601', 'GO:0060740']
807	GO:BP	GO:0010452	histone H3-K36 methylation	0.558904	FALSE	"The modification of histone H3 by addition of one or more methyl groups to lysine at position 36 of the histone." [GOC:pr, GOC:tb]	15	1346	6	21118	0.00445765	0.4	query_1	['GO:0034968']
808	GO:BP	GO:0043923	positive regulation by host of viral transcription	0.558904	FALSE	"Any process in which a host organism activates or increases the frequency, rate or extent of viral transcription, the synthesis of either RNA on a template of DNA or DNA on a template of RNA." [GOC:jl]	15	1346	6	21118	0.00445765	0.4	query_1	['GO:0019083', 'GO:0051851']
809	GO:BP	GO:0042772	DNA damage response, signal transduction resulting in transcription	0.558904	FALSE	"A cascade of processes initiated in response to the detection of DNA damage, and resulting in the induction of transcription." [GOC:go_curators]	15	1346	6	21118	0.00445765	0.4	query_1	['GO:0042770']
810	GO:BP	GO:0021819	layer formation in cerebral cortex	0.558904	FALSE	"The detachment of cells from radial glial fibers at the appropriate time when they cease to migrate and form distinct layer in the cerebral cortex." [GO_REF:0000021, GOC:cls, GOC:dgh, GOC:dph, GOC:jid, PMID:12626695]	15	1346	6	21118	0.00445765	0.4	query_1	['GO:0021801', 'GO:0048646']
811	GO:BP	GO:0006936	muscle contraction	0.566715	FALSE	"A process in which force is generated within muscle tissue, resulting in a change in muscle geometry. Force generation involves a chemo-mechanical energy conversion step that is carried out by the actin/myosin complex activity, which generates force through ATP hydrolysis." [GOC:ef, GOC:mtg_muscle, ISBN:0198506732]	312	1346	37	21118	0.0274889	0.11859	query_1	['GO:0003012']
812	GO:BP	GO:0030879	mammary gland development	0.568225	FALSE	"The process whose specific outcome is the progression of the mammary gland over time, from its formation to the mature structure. The mammary gland is a large compound sebaceous gland that in female mammals is modified to secrete milk. Its development starts with the formation of the mammary line and ends as the mature gland cycles between nursing and weaning stages." [PMID:9576833]	170	1346	24	21118	0.0178306	0.141176	query_1	['GO:0048732']
813	GO:BP	GO:0072538	T-helper 17 type immune response	0.574984	FALSE	"An immune response which is associated with resistance to intracellular bacteria with a key role in inflammation and tissue injury. This immune response is associated with pathological autoimmune conditions such as multiple sclerosis, arthritis and psoriasis which is typically orchestrated by the production of particular cytokines by T-helper 17 cells, most notably interleukin-17, IL-21 and IL-2…	34	1346	9	21118	0.00668648	0.264706	query_1	['GO:0002460']
814	GO:BP	GO:0010719	negative regulation of epithelial to mesenchymal transition	0.574984	FALSE	"Any process that decreases the rate, frequency, or extent of epithelial to mesenchymal transition. Epithelial to mesenchymal transition where an epithelial cell loses apical/basolateral polarity, severs intercellular adhesive junctions, degrades basement membrane components and becomes a migratory mesenchymal cell." [GOC:BHF, GOC:dph, GOC:tb]	34	1346	9	21118	0.00668648	0.264706	query_1	['GO:0001837', 'GO:0010717', 'GO:0045596', 'GO:0051241']
815	GO:BP	GO:0003209	cardiac atrium morphogenesis	0.574984	FALSE	"The process in which the cardiac atrium is generated and organized. A cardiac atrium receives blood from a vein and pumps it to a cardiac ventricle." [GOC:mtg_heart]	34	1346	9	21118	0.00668648	0.264706	query_1	['GO:0003206', 'GO:0003230']
816	GO:BP	GO:0060441	epithelial tube branching involved in lung morphogenesis	0.574984	FALSE	"The process in which a highly ordered sequence of patterning events generates the branched epithelial tubes of the lung, consisting of reiterated combinations of bud outgrowth, elongation, and dichotomous subdivision of terminal units." [GOC:dph, GOC:mtg_lung]	34	1346	9	21118	0.00668648	0.264706	query_1	['GO:0048754', 'GO:0060425']
817	GO:BP	GO:0016573	histone acetylation	0.583284	FALSE	"The modification of a histone by the addition of an acetyl group." [GOC:ai]	160	1346	23	21118	0.0170877	0.14375	query_1	['GO:0016570', 'GO:0018393']
818	GO:BP	GO:1902806	regulation of cell cycle G1/S phase transition	0.590468	FALSE	"Any signalling pathway that modulates the activity of a cell cycle cyclin-dependent protein kinase to modulate the switch from G1 phase to S phase of the cell cycle." [GO_REF:0000058, GOC:mtg_cell_cycle, GOC:TermGenie]	130	1346	20	21118	0.0148588	0.153846	query_1	['GO:0044843', 'GO:1901987']
819	GO:BP	GO:0001935	endothelial cell proliferation	0.59296	FALSE	"The multiplication or reproduction of endothelial cells, resulting in the expansion of a cell population. Endothelial cells are thin flattened cells which line the inside surfaces of body cavities, blood vessels, and lymph vessels, making up the endothelium." [GOC:add, ISBN:0781735149]	150	1346	22	21118	0.0163447	0.146667	query_1	['GO:0050673']
820	GO:BP	GO:0070664	negative regulation of leukocyte proliferation	0.595227	FALSE	"Any process that stops, prevents, or reduces the frequency, rate or extent of leukocyte proliferation." [GOC:add, GOC:mah]	92	1346	16	21118	0.0118871	0.173913	query_1	['GO:0008285', 'GO:0070661', 'GO:0070663']
821	GO:BP	GO:0009894	regulation of catabolic process	0.595983	FALSE	"Any process that modulates the frequency, rate, or extent of the chemical reactions and pathways resulting in the breakdown of substances." [GOC:go_curators]	893	1346	84	21118	0.0624071	0.0940649	query_1	['GO:0009056', 'GO:0019222']
822	GO:BP	GO:0002376	immune system process	0.597909	FALSE	"Any process involved in the development or functioning of the immune system, an organismal system for calibrated responses to potential internal or invasive threats." [GO_REF:0000022, GOC:add]	2807	1346	223	21118	0.165676	0.0794442	query_1	['GO:0008150']
823	GO:BP	GO:2000491	positive regulation of hepatic stellate cell activation	0.616973	FALSE	"Any process that activates or increases the frequency, rate or extent of hepatic stellate cell activation." [GOC:obol]	6	1346	4	21118	0.00297177	0.666667	query_1	['GO:0035733', 'GO:0050867', 'GO:2000489']
824	GO:BP	GO:0072103	glomerulus vasculature morphogenesis	0.616973	FALSE	"The process in which the anatomical structures of the glomerulus vasculature are generated and organized. The glomerulus vasculature is composed of the tubule structures that carry blood or lymph in the glomerulus." [GOC:mtg_kidney_jan10]	6	1346	4	21118	0.00297177	0.666667	query_1	['GO:0048514', 'GO:0061439', 'GO:0072012', 'GO:0072102']
825	GO:BP	GO:1904637	cellular response to ionomycin	0.616973	FALSE	"Any process that results in a change in state or activity of a cell (in terms of movement, secretion, enzyme production, gene expression, etc.) as a result of an ionomycin stimulus." [GO_REF:0000071, GOC:TermGenie, PMID:17516843]	6	1346	4	21118	0.00297177	0.666667	query_1	['GO:0071362', 'GO:0071398', 'GO:0071407', 'GO:1904636']
826	GO:BP	GO:1904636	response to ionomycin	0.616973	FALSE	"Any process that results in a change in state or activity of a cell or an organism (in terms of movement, secretion, enzyme production, gene expression, etc.) as a result of an ionomycin stimulus." [GO_REF:0000071, GOC:TermGenie, PMID:17516843]	6	1346	4	21118	0.00297177	0.666667	query_1	['GO:0014070', 'GO:0045472', 'GO:0070542']
827	GO:BP	GO:0072104	glomerular capillary formation	0.616973	FALSE	"The process that gives rise to a glomerular capillary. This process pertains to the initial formation of a structure from unspecified parts." [GOC:mtg_kidney_jan10]	6	1346	4	21118	0.00297177	0.666667	query_1	['GO:0001525', 'GO:0072103']
828	GO:BP	GO:0071772	response to BMP	0.621851	FALSE	"Any process that results in a change in state or activity of a cell or an organism (in terms of movement, secretion, enzyme production, gene expression, etc.) as a result of a bone morphogenetic protein (BMP) stimulus." [GOC:mah, GOC:yaf]	171	1346	24	21118	0.0178306	0.140351	query_1	['GO:0009719', 'GO:0070848']
829	GO:BP	GO:0071773	cellular response to BMP stimulus	0.621851	FALSE	"Any process that results in a change in state or activity of a cell (in terms of movement, secretion, enzyme production, gene expression, etc.) as a result of a bone morphogenetic protein (BMP) stimulus." [GOC:mah, GOC:yaf]	171	1346	24	21118	0.0178306	0.140351	query_1	['GO:0071363', 'GO:0071495', 'GO:0071772']
830	GO:BP	GO:2000241	regulation of reproductive process	0.624003	FALSE	"Any process that modulates the frequency, rate or extent of reproductive process." [GOC:mah]	192	1346	26	21118	0.0193165	0.135417	query_1	['GO:0022414', 'GO:0050789']
831	GO:BP	GO:0042542	response to hydrogen peroxide	0.640259	FALSE	"Any process that results in a change in state or activity of a cell or an organism (in terms of movement, secretion, enzyme production, gene expression, etc.) as a result of a hydrogen peroxide (H2O2) stimulus." [GOC:jl]	161	1346	23	21118	0.0170877	0.142857	query_1	['GO:0000302', 'GO:0010035']
832	GO:BP	GO:0051640	organelle localization	0.643194	FALSE	"Any process in which an organelle is transported to, and/or maintained in, a specific location." [GOC:ai]	528	1346	55	21118	0.0408618	0.104167	query_1	['GO:0051641']
833	GO:BP	GO:0048146	positive regulation of fibroblast proliferation	0.643601	FALSE	"Any process that activates or increases the frequency, rate or extent of multiplication or reproduction of fibroblast cells." [GOC:jid]	66	1346	13	21118	0.00965825	0.19697	query_1	['GO:0008284', 'GO:0048144', 'GO:0048145']
834	GO:BP	GO:0022029	telencephalon cell migration	0.643601	FALSE	"The orderly movement of a cell from one site to another at least one of which is located in the telencephalon." [GO_REF:0000021, GOC:cls, GOC:curators, GOC:dgh, GOC:dph, GOC:jid]	66	1346	13	21118	0.00965825	0.19697	query_1	['GO:0021537', 'GO:0021885']
835	GO:BP	GO:0097305	response to alcohol	0.646278	FALSE	"Any process that results in a change in state or activity of a cell or an organism (in terms of movement, secretion, enzyme production, gene expression, etc.) as a result of an alcohol stimulus." [GOC:pr, PMID:24014527]	280	1346	34	21118	0.02526	0.121429	query_1	['GO:0010033', 'GO:1901700']
836	GO:BP	GO:0106106	cold-induced thermogenesis	0.655869	FALSE	"The process by which heat is generated by increasing metabolism in response to cold ambient temperatures in order to maintain a stable core body temperature." [PMID:27876809]	131	1346	20	21118	0.0148588	0.152672	query_1	['GO:0001659', 'GO:1990845']
837	GO:BP	GO:0120161	regulation of cold-induced thermogenesis	0.655869	FALSE	"Any process that modulates the frequency, rate or extent of cold-induced thermogenesis." [PMID:27876809]	131	1346	20	21118	0.0148588	0.152672	query_1	['GO:0019222', 'GO:0051239', 'GO:0065008', 'GO:0106106']
838	GO:BP	GO:0070555	response to interleukin-1	0.655869	FALSE	"Any process that results in a change in state or activity of a cell or an organism (in terms of movement, secretion, enzyme production, gene expression, etc.) as a result of an interleukin-1 stimulus." [GOC:BHF, GOC:mah]	131	1346	20	21118	0.0148588	0.152672	query_1	['GO:0034097']
839	GO:BP	GO:0001890	placenta development	0.679901	FALSE	"The process whose specific outcome is the progression of the placenta over time, from its formation to the mature structure. The placenta is an organ of metabolic interchange between fetus and mother, partly of embryonic origin and partly of maternal origin." [GOC:add, ISBN:068340007X]	172	1346	24	21118	0.0178306	0.139535	query_1	['GO:0048513', 'GO:0048608']
840	GO:BP	GO:0006810	transport	0.683077	FALSE	"The directed movement of substances (such as macromolecules, small molecules, ions) or cellular components (such as complexes and organelles) into, out of or within a cell, or between cells, or within a multicellular organism by means of some agent such as a transporter, pore or motor protein." [GOC:dos, GOC:dph, GOC:jl, GOC:mah]	4502	1346	339	21118	0.251857	0.0752999	query_1	['GO:0051234']
841	GO:BP	GO:0045778	positive regulation of ossification	0.685629	FALSE	"Any process that activates or increases the frequency, rate or extent of ossification, the formation of bone or of a bony substance or the conversion of fibrous tissue or of cartilage into bone or a bony substance." [GOC:go_curators]	58	1346	12	21118	0.0089153	0.206897	query_1	['GO:0001503', 'GO:0030278', 'GO:0051240']
842	GO:BP	GO:0090066	regulation of anatomical structure size	0.68692	FALSE	"Any process that modulates the size of an anatomical structure." [GOC:dph, GOC:tb]	554	1346	57	21118	0.0423477	0.102888	query_1	['GO:0065008']
843	GO:BP	GO:0051817	modulation of process of other organism involved in symbiotic interaction	0.687954	FALSE	"The process in which an organism effects a change in the structure or processes of a second organism, where the two organisms are in a symbiotic interaction." [GOC:cc]	84	1346	15	21118	0.0111441	0.178571	query_1	['GO:0035821']
844	GO:BP	GO:0061383	trabecula morphogenesis	0.699297	FALSE	"The process of shaping a trabecula in an organ. A trabecula is a small, often microscopic, tissue element in the form of a small beam, strut or rod, which generally has a mechanical function. Trabecula are usually but not necessarily, composed of dense collagenous tissue." [GOC:dph]	50	1346	11	21118	0.00817236	0.22	query_1	['GO:0009653']
845	GO:BP	GO:0006695	cholesterol biosynthetic process	0.699297	FALSE	"The chemical reactions and pathways resulting in the formation of cholesterol, cholest-5-en-3 beta-ol, the principal sterol of vertebrates and the precursor of many steroids, including bile acids and steroid hormones." [GOC:ai]	50	1346	11	21118	0.00817236	0.22	query_1	['GO:0008203', 'GO:0016126', 'GO:1902653']
846	GO:BP	GO:1902653	secondary alcohol biosynthetic process	0.699297	FALSE	"The chemical reactions and pathways resulting in the formation of secondary alcohol." [GO_REF:0000068, GOC:mengo_curators, GOC:TermGenie, PMID:11288200]	50	1346	11	21118	0.00817236	0.22	query_1	['GO:0046165', 'GO:1902652']
847	GO:BP	GO:0061047	positive regulation of branching involved in lung morphogenesis	0.717741	FALSE	"Any process that increases the rate, frequency, or extent of the process in which a highly ordered sequence of patterning events generates the branched structures of the lung, consisting of reiterated combinations of bud outgrowth, elongation, and dichotomous subdivision of terminal units." [GOC:dph, GOC:yaf]	3	1346	3	21118	0.00222883	1	query_1	['GO:0051240', 'GO:0060441', 'GO:0061046', 'GO:1905332']
848	GO:BP	GO:0044087	regulation of cellular component biogenesis	0.728812	FALSE	"Any process that modulates the frequency, rate or extent of cellular component biogenesis, a process that results in the biosynthesis of constituent macromolecules, assembly, and arrangement of constituent parts of a cellular component." [GOC:jl]	977	1346	90	21118	0.0668648	0.0921187	query_1	['GO:0044085', 'GO:0050794']
849	GO:BP	GO:1901863	positive regulation of muscle tissue development	0.72922	FALSE	"Any process that activates or increases the frequency, rate or extent of muscle tissue development." [GOC:TermGenie, GOC:yaf, PMID:23150719]	28	1346	8	21118	0.00594354	0.285714	query_1	['GO:0051094', 'GO:0060537', 'GO:1901861']
850	GO:BP	GO:0009954	proximal/distal pattern formation	0.730601	FALSE	"The regionalization process in which specific areas of cell differentiation are determined along a proximal/distal axis. The proximal/distal axis is defined by a line that runs from main body (proximal end) of an organism outward (distal end)." [GOC:dph, GOC:go_curators, GOC:isa_complete]	35	1346	9	21118	0.00668648	0.257143	query_1	['GO:0003002']
851	GO:BP	GO:0007219	Notch signaling pathway	0.742682	FALSE	"A series of molecular signals initiated by the binding of an extracellular ligand to the receptor Notch on the surface of a target cell, and ending with regulation of a downstream cellular process, e.g. transcription." [GOC:go_curators, GOC:signaling]	173	1346	24	21118	0.0178306	0.138728	query_1	['GO:0007166']
852	GO:BP	GO:0032970	regulation of actin filament-based process	0.745192	FALSE	"Any process that modulates the frequency, rate or extent of any cellular process that depends upon or alters the actin cytoskeleton." [GOC:mah]	410	1346	45	21118	0.0334324	0.109756	query_1	['GO:0030029', 'GO:0050794']
853	GO:BP	GO:0048511	rhythmic process	0.771267	FALSE	"Any process pertinent to the generation and maintenance of rhythms in the physiology of an organism." [GOC:jid]	340	1346	39	21118	0.0289747	0.114706	query_1	['GO:0008150']
854	GO:BP	GO:1901654	response to ketone	0.772827	FALSE	"A response that results in a state of tolerance to ketone." [GOC:mengo_curators, PMID:23356676]	227	1346	29	21118	0.0215453	0.127753	query_1	['GO:0010033', 'GO:1901700']
855	GO:BP	GO:0000302	response to reactive oxygen species	0.772827	FALSE	"Any process that results in a change in state or activity of a cell or an organism (in terms of movement, secretion, enzyme production, gene expression, etc.) as a result of a reactive oxygen species stimulus. Reactive oxygen species include singlet oxygen, superoxide, and oxygen free radicals." [GOC:krc]	227	1346	29	21118	0.0215453	0.127753	query_1	['GO:0006979', 'GO:1901700']
856	GO:BP	GO:0007626	locomotory behavior	0.773902	FALSE	"The specific movement from place to place of an organism in response to external or internal stimuli. Locomotion of a whole organism in a manner dependent upon some combination of that organism's internal state and external conditions." [GOC:dph]	238	1346	30	21118	0.0222883	0.12605	query_1	['GO:0007610']
857	GO:BP	GO:0010657	muscle cell apoptotic process	0.77435	FALSE	"A form of programmed cell death induced by external or internal signals that trigger the activity of proteolytic caspases, whose actions dismantle a muscle cell and result in its death. A muscle cell is a mature contractile cell, commonly known as a myocyte, that forms one of three kinds of muscle." [CL:0000187, GOC:dph, GOC:mtg_apoptosis, GOC:tb]	113	1346	18	21118	0.013373	0.159292	query_1	['GO:0006915']
858	GO:BP	GO:1903035	negative regulation of response to wounding	0.786902	FALSE	"Any process that stops, prevents or reduces the frequency, rate or extent of response to wounding." [GO_REF:0000058, GOC:kmv, GOC:TermGenie, pmid:19164535]	85	1346	15	21118	0.0111441	0.176471	query_1	['GO:0009611', 'GO:0048585', 'GO:1903034']
859	GO:BP	GO:0120162	positive regulation of cold-induced thermogenesis	0.786902	FALSE	"Any process that activates or increases the frequency, rate or extent of cold-induced thermogenesis." [PMID:27876809]	85	1346	15	21118	0.0111441	0.176471	query_1	['GO:0009893', 'GO:0051240', 'GO:0106106', 'GO:0120161']
860	GO:BP	GO:0010761	fibroblast migration	0.811391	FALSE	"Cell migration that is accomplished by extension and retraction of a fibroblast pseudopodium. A fibroblast is a connective tissue cell which secretes an extracellular matrix rich in collagen and other macromolecules." [GOC:BHF, GOC:dph, GOC:tb]	59	1346	12	21118	0.0089153	0.20339	query_1	['GO:0001667']
861	GO:BP	GO:0097435	supramolecular fiber organization	0.816998	FALSE	"A process that is carried out at the cellular level which results in the assembly, arrangement of constituent parts, or disassembly of a supramolecular fiber, a polymer consisting of an indefinite number of protein or protein complex subunits that have polymerised to form a fiber-shaped structure." [GOC:pr]	734	1346	71	21118	0.0527489	0.0967302	query_1	['GO:0016043']
862	GO:BP	GO:0045601	regulation of endothelial cell differentiation	0.821439	FALSE	"Any process that modulates the frequency, rate or extent of endothelial cell differentiation." [GOC:go_curators]	43	1346	10	21118	0.00742942	0.232558	query_1	['GO:0030856', 'GO:0045446']
863	GO:BP	GO:0042311	vasodilation	0.821439	FALSE	"An increase in the internal diameter of blood vessels, especially arterioles or capillaries, due to relaxation of smooth muscle cells that line the vessels, and usually resulting in a decrease in blood pressure." [GOC:pr, ISBN:0192800981]	43	1346	10	21118	0.00742942	0.232558	query_1	['GO:0097746']
864	GO:BP	GO:0018209	peptidyl-serine modification	0.834819	FALSE	"The modification of peptidyl-serine." [GOC:go_curators]	353	1346	40	21118	0.0297177	0.113314	query_1	['GO:0018193']
865	GO:BP	GO:0033151	V(D)J recombination	0.846127	FALSE	"The process in which immune receptor V, D, and J, or V and J gene segments, depending on the specific receptor, are recombined within a single locus utilizing the conserved heptamer and nonomer recombination signal sequences (RSS)." [GOC:add, ISBN:0781700221, ISBN:0781735149]	16	1346	6	21118	0.00445765	0.375	query_1	['GO:0002562']
866	GO:BP	GO:0060572	morphogenesis of an epithelial bud	0.846127	FALSE	"The morphogenetic process in which a bud forms from an epithelial sheet. A bud is a protrusion that forms form the sheet by localized folding." [GOC:dph]	16	1346	6	21118	0.00445765	0.375	query_1	['GO:0060571']
867	GO:BP	GO:0016311	dephosphorylation	0.862475	FALSE	"The process of removing one or more phosphoric (ester or anhydride) residues from a molecule." [ISBN:0198506732]	473	1346	50	21118	0.0371471	0.105708	query_1	['GO:0006796']
868	GO:BP	GO:0010817	regulation of hormone levels	0.863439	FALSE	"Any process that modulates the levels of hormone within an organism or a tissue. A hormone is any substance formed in very small amounts in one specialized organ or group of cells and carried (sometimes in the bloodstream) to another organ or group of cells in the same organism, upon which it has a specific regulatory action." [GOC:BHF, GOC:dph, GOC:tb]	559	1346	57	21118	0.0423477	0.101968	query_1	['GO:0065008']
869	GO:BP	GO:0097306	cellular response to alcohol	0.870274	FALSE	"Any process that results in a change in state or activity of a cell (in terms of movement, secretion, enzyme production, gene expression, etc.) as a result of an alcohol stimulus." [GOC:pr]	95	1346	16	21118	0.0118871	0.168421	query_1	['GO:0071310', 'GO:0097305', 'GO:1901701']
870	GO:BP	GO:0070167	regulation of biomineral tissue development	0.870274	FALSE	"Any process that modulates the frequency, rate or extent of biomineral tissue development, the formation of hard tissues that consist mainly of inorganic compounds." [GOC:mah]	95	1346	16	21118	0.0118871	0.168421	query_1	['GO:0031214', 'GO:0110149', 'GO:2000026']
871	GO:BP	GO:0032101	regulation of response to external stimulus	0.882434	FALSE	"Any process that modulates the frequency, rate or extent of a response to an external stimulus." [GOC:mah]	904	1346	84	21118	0.0624071	0.0929204	query_1	['GO:0009605', 'GO:0048583']
872	GO:BP	GO:0043525	positive regulation of neuron apoptotic process	0.902845	FALSE	"Any process that activates or increases the frequency, rate or extent of cell death of neurons by apoptotic process." [GOC:go_curators, GOC:mtg_apoptosis]	77	1346	14	21118	0.0104012	0.181818	query_1	['GO:0043065', 'GO:0043523', 'GO:0051402', 'GO:1901216']
873	GO:BP	GO:0031060	regulation of histone methylation	0.902845	FALSE	"Any process that modulates the frequency, rate or extent of the covalent addition of methyl groups to histones." [GOC:mah]	77	1346	14	21118	0.0104012	0.181818	query_1	['GO:0016571', 'GO:0031056']
874	GO:BP	GO:0048566	embryonic digestive tract development	0.919535	FALSE	"The process whose specific outcome is the progression of the gut over time, from its formation to the mature structure during embryonic development. The gut is the region of the digestive tract extending from the beginning of the intestines to the anus." [GOC:go_curators]	36	1346	9	21118	0.00668648	0.25	query_1	['GO:0048565', 'GO:0048568']
875	GO:BP	GO:0031128	developmental induction	0.919535	FALSE	"A developmental process involving two tissues in which one tissue (the inducer) produces a signal that directs cell fate commitment of cells in the second tissue (the responder)." [GOC:cjm, GOC:dph, GOC:mah, PMID:24503535]	36	1346	9	21118	0.00668648	0.25	query_1	['GO:0032502']
876	GO:BP	GO:0050803	regulation of synapse structure or activity	0.937975	FALSE	"Any process that modulates the physical form or the activity of a synapse, the junction between a neuron and a target (neuron, muscle, or secretory cell)." [GOC:ai]	263	1346	32	21118	0.0237741	0.121673	query_1	['GO:0065008']
877	GO:BP	GO:0050731	positive regulation of peptidyl-tyrosine phosphorylation	0.939937	FALSE	"Any process that activates or increases the frequency, rate or extent of the phosphorylation of peptidyl-tyrosine." [GOC:ai]	197	1346	26	21118	0.0193165	0.13198	query_1	['GO:0001934', 'GO:0018108', 'GO:0050730']
878	GO:BP	GO:0003156	regulation of animal organ formation	0.951164	FALSE	"Any process that modulates the rate, frequency or extent of animal organ formation. Organ formation is the process pertaining to the initial formation of an organ from unspecified parts. The process begins with the specific processes that contribute to the appearance of the discrete structure, such as inductive events, and ends when the structural rudiment of the organ is recognizable, such as a…	29	1346	8	21118	0.00594354	0.275862	query_1	['GO:0048645', 'GO:2000027']
879	GO:BP	GO:0060977	coronary vasculature morphogenesis	0.951164	FALSE	"The process in which the anatomical structures of blood vessels of the heart are generated and organized. The blood vessel is the vasculature carrying blood." [GOC:mtg_heart]	29	1346	8	21118	0.00594354	0.275862	query_1	['GO:0048514', 'GO:0060976']
880	GO:BP	GO:0072539	T-helper 17 cell differentiation	0.951164	FALSE	"The process in which a relatively unspecialized T cell acquires the specialized features of a T-helper 17 (Th17) cell. A Th17 cell is a CD4-positive, alpha-beta T cell with the phenotype RORgamma-t-positive that produces IL-17." [CL:0000899, GOC:BHF, GOC:ebc]	29	1346	8	21118	0.00594354	0.275862	query_1	['GO:0042093', 'GO:0072538']
881	GO:BP	GO:0031668	cellular response to extracellular stimulus	0.951535	FALSE	"Any process that results in a change in state or activity of a cell (in terms of movement, secretion, enzyme production, gene expression, etc.) as a result of an extracellular stimulus." [GOC:mah]	252	1346	31	21118	0.0230312	0.123016	query_1	['GO:0007154', 'GO:0009991', 'GO:0051716', 'GO:0071496']
882	GO:BP	GO:0010596	negative regulation of endothelial cell migration	0.956182	FALSE	"Any process that decreases the rate, frequency, or extent of the orderly movement of an endothelial cell into the extracellular matrix to form an endothelium." [GOC:BHF, GOC:dph, GOC:tb]	60	1346	12	21118	0.0089153	0.2	query_1	['GO:0010594', 'GO:0010633', 'GO:0043542']
883	GO:BP	GO:0060350	endochondral bone morphogenesis	0.956182	FALSE	"The process in which bones are generated and organized as a result of the conversion of initial cartilaginous anlage into bone." [GOC:dph, PMID:11680679]	60	1346	12	21118	0.0089153	0.2	query_1	['GO:0060349']
884	GO:BP	GO:0046651	lymphocyte proliferation	0.966501	FALSE	"The expansion of a lymphocyte population by cell division." [GOC:ai]	309	1346	36	21118	0.0267459	0.116505	query_1	['GO:0032943', 'GO:0046649']
885	GO:BP	GO:1901030	positive regulation of mitochondrial outer membrane permeabilization involved in apoptotic signaling pathway	0.968603	FALSE	"Any process that activates or increases the frequency, rate or extent of mitochondrial outer membrane permeabilization involved in apoptotic signaling pathway." [GOC:BHF, GOC:mtg_apoptosis, GOC:TermGenie]	11	1346	5	21118	0.00371471	0.454545	query_1	['GO:0010822', 'GO:0051050', 'GO:0097345', 'GO:1901028']
886	GO:BP	GO:0060379	cardiac muscle cell myoblast differentiation	0.968603	FALSE	"The process in which a relatively unspecialized cell acquires specialized features of a cardiac myoblast. A cardiac myoblast is a precursor cell that has been committed to a cardiac muscle cell fate but retains the ability to divide and proliferate throughout life." [GOC:dph, GOC:tb]	11	1346	5	21118	0.00371471	0.454545	query_1	['GO:0010002', 'GO:0045445']
887	GO:BP	GO:1990845	adaptive thermogenesis	0.973262	FALSE	"The regulated production of heat in response to short term environmental changes, such as stress, diet or reduced temperature." [PMID:17260010, PMID:20363363]	145	1346	21	21118	0.0156018	0.144828	query_1	['GO:0008152']
888	GO:BP	GO:0002244	hematopoietic progenitor cell differentiation	0.973262	FALSE	"The process in which precursor cell type acquires the specialized features of a hematopoietic progenitor cell, a class of cell types including myeloid progenitor cells and lymphoid progenitor cells." [GOC:add, GOC:rl, ISBN:0781735149, PMID:16551251]	145	1346	21	21118	0.0156018	0.144828	query_1	['GO:0030097', 'GO:0030154']
889	GO:BP	GO:0014902	myotube differentiation	0.983917	FALSE	"The process in which a relatively unspecialized cell acquires specialized features of a myotube cell. Myotube differentiation starts with myoblast fusion and the appearance of specific cell markers (this is the cell development step). Then individual myotubes can fuse to form bigger myotubes and start to contract. Myotubes are multinucleated cells that are formed when proliferating myoblasts exi…	125	1346	19	21118	0.0141159	0.152	query_1	['GO:0051146']
890	GO:BP	GO:0001936	regulation of endothelial cell proliferation	0.985227	FALSE	"Any process that modulates the frequency, rate, or extent of endothelial cell proliferation." [GOC:add]	135	1346	20	21118	0.0148588	0.148148	query_1	['GO:0001935', 'GO:0050678']
891	GO:BP	GO:0051234	establishment of localization	0.993534	FALSE	"Any process that localizes a substance or cellular component. This may occur via movement, tethering or selective degradation." [GOC:ai, GOC:dos]	4658	1346	348	21118	0.258544	0.0747102	query_1	['GO:0051179']
892	GO:BP	GO:0060753	regulation of mast cell chemotaxis	1	FALSE	"Any process that modulates the rate, frequency or extent of mast cell chemotaxis. Mast cell chemotaxis is the movement of a mast cell in response to an external stimulus." [GOC:dph, GOC:tb]	9	1346	2	21118	0.00148588	0.222222	query_1	['GO:0002551', 'GO:0002688']
893	GO:BP	GO:0060746	parental behavior	1	FALSE	"A reproductive behavior in which a parent cares for and rears offspring." [GOC:dph]	16	1346	4	21118	0.00297177	0.25	query_1	['GO:0019098']
894	GO:BP	GO:0061090	positive regulation of sequestering of zinc ion	1	FALSE	"Any process that increases the rate, frequency, or extent of sequestering of zinc ion. Sequestering of zinc ion is the process of binding or confining zinc ions such that they are separated from other components of a biological system." [GOC:BHF, GOC:dph, GOC:tb]	1	1346	1	21118	0.000742942	1	query_1	['GO:0032119', 'GO:0048522', 'GO:0061088']
895	GO:BP	GO:0060754	positive regulation of mast cell chemotaxis	1	FALSE	"Any process that increases the rate, frequency or extent of mast cell chemotaxis. Mast cell chemotaxis is the movement of a mast cell in response to an external stimulus." [GOC:dph, GOC:tb]	7	1346	2	21118	0.00148588	0.285714	query_1	['GO:0002551', 'GO:0002690', 'GO:0060753']
896	GO:BP	GO:0060759	regulation of response to cytokine stimulus	1	FALSE	"Any process that modulates the rate, frequency, or extent of a response to cytokine stimulus." [GOC:BHF, GOC:dph, GOC:tb]	132	1346	9	21118	0.00668648	0.0681818	query_1	['GO:0034097', 'GO:0048583']
897	GO:BP	GO:0071727	cellular response to triacyl bacterial lipopeptide	1	FALSE	"Any process that results in a change in state or activity of a cell (in terms of movement, secretion, enzyme production, gene expression, etc.) as a result of a triacylated bacterial lipopeptide stimulus." [GOC:add, PMID:12077222, PMID:12524386, PMID:2757794]	3	1346	1	21118	0.000742942	0.333333	query_1	['GO:0071221', 'GO:0071725']
898	GO:BP	GO:0061097	regulation of protein tyrosine kinase activity	1	FALSE	"Any process that modulates the rate, frequency, or extent of protein tyrosine kinase activity." [GOC:dph, GOC:tb]	92	1346	11	21118	0.00817236	0.119565	query_1	['GO:0045859', 'GO:0050730']
899	GO:BP	GO:0061098	positive regulation of protein tyrosine kinase activity	1	FALSE	"Any process that increases the rate, frequency, or extent of protein tyrosine kinase activity." [GOC:dph, GOC:tb]	57	1346	9	21118	0.00668648	0.157895	query_1	['GO:0045860', 'GO:0050731', 'GO:0061097']
900	GO:BP	GO:0060750	epithelial cell proliferation involved in mammary gland duct elongation	1	FALSE	"The multiplication or reproduction of mammary gland branch epithelial cells, resulting in the elongation of the branch. The mammary gland branch differs from the bud in that it is not the initial curved portion of the outgrowth." [GOC:dph]	5	1346	1	21118	0.000742942	0.2	query_1	['GO:0033598', 'GO:0060751']
901	GO:BP	GO:0060751	branch elongation involved in mammary gland duct branching	1	FALSE	"The developmental growth process in which a branch of a mammary gland duct elongates." [GOC:dph]	6	1346	1	21118	0.000742942	0.166667	query_1	['GO:0060444', 'GO:0060602']
902	GO:BP	GO:0061108	seminal vesicle epithelium development	1	FALSE	"The progression of the seminal vesicle epithelium over time, from its formation to the mature structure." [GOC:dph]	1	1346	1	21118	0.000742942	1	query_1	['GO:0035295', 'GO:0048608', 'GO:0060429', 'GO:0061107']
903	GO:BP	GO:0061110	dense core granule biogenesis	1	FALSE	"A cellular process that results in the biosynthesis of constituent macromolecules, assembly, and arrangement of constituent parts of a dense core granule. Includes biosynthesis of constituent macromolecules, and those macromolecular modifications that are involved in synthesis or assembly of the dense core granule." [GOC:dph]	3	1346	2	21118	0.00148588	0.666667	query_1	['GO:0044085']
904	GO:BP	GO:0060742	epithelial cell differentiation involved in prostate gland development	1	FALSE	"The process in which a relatively unspecialized cell acquires specialized features of an epithelial cell of the prostate gland." [GOC:dph]	13	1346	2	21118	0.00148588	0.153846	query_1	['GO:0003006', 'GO:0030850', 'GO:0030855']
905	GO:BP	GO:0061101	neuroendocrine cell differentiation	1	FALSE	"The process in which a relatively unspecialized cell acquires specialized structural and/or functional features of a neuroendocrine cell. A neuroendocrine cell is a cell that receives input form a neuron which controls the secretion of an endocrine substance." [GOC:dph]	9	1346	2	21118	0.00148588	0.222222	query_1	['GO:0060563']
906	GO:BP	GO:0071732	cellular response to nitric oxide	1	FALSE	"Any process that results in a change in state or activity of a cell (in terms of movement, secretion, enzyme production, gene expression, etc.) as a result of a nitric oxide stimulus." [GOC:mah, GOC:yaf]	17	1346	3	21118	0.00222883	0.176471	query_1	['GO:0071241', 'GO:0071731', 'GO:1901701', 'GO:1902170']
907	GO:BP	GO:0060749	mammary gland alveolus development	1	FALSE	"The progression of the mammary gland alveolus over time, from its formation to its mature state. The mammary gland alveolus is a sac-like structure that is found in the mature gland." [GOC:dph]	21	1346	2	21118	0.00148588	0.0952381	query_1	['GO:0048856', 'GO:0061377']
908	GO:BP	GO:0071731	response to nitric oxide	1	FALSE	"Any process that results in a change in state or activity of a cell or an organism (in terms of movement, secretion, enzyme production, gene expression, etc.) as a result of a nitric oxide stimulus." [GOC:mah, GOC:yaf]	22	1346	3	21118	0.00222883	0.136364	query_1	['GO:0010035', 'GO:1901698', 'GO:1901700']
909	GO:BP	GO:0060745	mammary gland branching involved in pregnancy	1	FALSE	"The process in which the branching structure of the mammary gland duct is generated and organized as a part of pregnancy." [GOC:dph, PMID:19261859]	7	1346	1	21118	0.000742942	0.142857	query_1	['GO:0003006', 'GO:0060135', 'GO:0060444']
910	GO:BP	GO:0061099	negative regulation of protein tyrosine kinase activity	1	FALSE	"Any process that decreases the rate, frequency, or extent of protein tyrosine kinase activity." [GOC:dph, GOC:tb]	32	1346	3	21118	0.00222883	0.09375	query_1	['GO:0006469', 'GO:0050732', 'GO:0061097']
911	GO:BP	GO:0061107	seminal vesicle development	1	FALSE	"The progression of the seminal vesicle over time, from its formation to the mature structure. The seminal vesicle is a gland that contributes to the production of semen." [GOC:dph]	2	1346	1	21118	0.000742942	0.5	query_1	['GO:0048608', 'GO:0048732']
912	GO:BP	GO:0061082	myeloid leukocyte cytokine production	1	FALSE	"Any process that contributes to cytokine production by a myeloid cell." [GOC:dph]	28	1346	4	21118	0.00297177	0.142857	query_1	['GO:0002367']
913	GO:BP	GO:0071504	cellular response to heparin	1	FALSE	"Any process that results in a change in state or activity of a cell (in terms of movement, secretion, enzyme production, gene expression, etc.) as a result of a heparin stimulus." [GOC:mah, GOC:yaf]	4	1346	2	21118	0.00148588	0.5	query_1	['GO:0071417', 'GO:0071503', 'GO:1901701']
914	GO:BP	GO:0061050	regulation of cell growth involved in cardiac muscle cell development	1	FALSE	"Any process that modulates the rate, frequency, or extent of the growth of a cardiac muscle cell, where growth contributes to the progression of the cell over time from its initial formation to its mature state." [GOC:dph]	32	1346	4	21118	0.00297177	0.125	query_1	['GO:0001558', 'GO:0055021', 'GO:0061049']
915	GO:BP	GO:0071517	maintenance of imprinting at mating-type locus	1	FALSE	"Any process involved in preserving the structure of a stable single-strand DNA lesion that triggers programmed gene conversion at the mating-type locus, thereby restricting mating-type interconversion to one of the two sister chromatids during DNA replication." [GOC:mah, PMID:14765111, PMID:18723894]	2	1346	1	21118	0.000742942	0.5	query_1	['GO:0006259', 'GO:0071515']
916	GO:BP	GO:0060789	hair follicle placode formation	1	FALSE	"The developmental process in which a hair placode forms. An hair follicle placode is a thickening of the ectoderm that will give rise to the hair follicle bud." [GOC:dph, GOC:sdb_2009, GOC:tb]	5	1346	1	21118	0.000742942	0.2	query_1	['GO:0001942', 'GO:0060788']
917	GO:BP	GO:0061051	positive regulation of cell growth involved in cardiac muscle cell development	1	FALSE	"Any process that increases the rate, frequency, or extent of the growth of a cardiac muscle cell, where growth contributes to the progression of the cell over time from its initial formation to its mature state." [GOC:dph]	17	1346	1	21118	0.000742942	0.0588235	query_1	['GO:0010613', 'GO:0030307', 'GO:0051155', 'GO:0055023', 'GO:0061049', 'GO:0061050']
918	GO:BP	GO:0061052	negative regulation of cell growth involved in cardiac muscle cell development	1	FALSE	"Any process that decreases the rate, frequency, or extent of the growth of a cardiac muscle cell, where growth contributes to the progression of the cell over time from its initial formation to its mature state." [GOC:dph]	16	1346	3	21118	0.00222883	0.1875	query_1	['GO:0010614', 'GO:0030308', 'GO:0051154', 'GO:0055022', 'GO:0061049', 'GO:0061050']
919	GO:BP	GO:0060788	ectodermal placode formation	1	FALSE	"The developmental process in which an ectodermal placode forms. An ectodermal placode is a thickening of the ectoderm that is the primordium of many structures derived from the ectoderm." [GOC:dph, GOC:sdb_2009, GOC:tb]	13	1346	1	21118	0.000742942	0.0769231	query_1	['GO:0048646', 'GO:0071697']
920	GO:BP	GO:0060784	regulation of cell proliferation involved in tissue homeostasis	1	FALSE	"Any process that modulates the frequency, rate or extent of cell proliferation resulting in the maintenance of a steady-state number of cells within a tissue." [GOC:dph]	1	1346	1	21118	0.000742942	1	query_1	['GO:0042127', 'GO:0048873']
921	GO:BP	GO:0060769	positive regulation of epithelial cell proliferation involved in prostate gland development	1	FALSE	"Any process that increases the rate, frequency or extent of epithelial cell proliferation that contributes to the progression of the prostate gland over time." [GOC:dph]	3	1346	1	21118	0.000742942	0.333333	query_1	['GO:0050679', 'GO:0051094', 'GO:0060767', 'GO:0060768', 'GO:2000243']
922	GO:BP	GO:0060768	regulation of epithelial cell proliferation involved in prostate gland development	1	FALSE	"Any process that modulates the rate, frequency or extent of epithelial cell proliferation that contributes to the progression of the prostate gland over time." [GOC:dph]	10	1346	2	21118	0.00148588	0.2	query_1	['GO:0050678', 'GO:0060767', 'GO:2000241']
923	GO:BP	GO:0060767	epithelial cell proliferation involved in prostate gland development	1	FALSE	"The multiplication or reproduction of epithelial cells, resulting in the expansion of a cell population that contributes to the progression of the prostate gland over time." [GOC:dph]	11	1346	3	21118	0.00222883	0.272727	query_1	['GO:0022414', 'GO:0030850', 'GO:0050673']
924	GO:BP	GO:0060766	negative regulation of androgen receptor signaling pathway	1	FALSE	"Any process that decreases the rate, frequency, or extent of the androgen receptor signaling pathway." [GOC:dph]	17	1346	3	21118	0.00222883	0.176471	query_1	['GO:0030521', 'GO:0033144', 'GO:0060765']
925	GO:BP	GO:0061053	somite development	1	FALSE	"The progression of a somite from its initial formation to the mature structure. Somites are mesodermal clusters that are arranged segmentally along the anterior posterior axis of an embryo." [GOC:dph]	91	1346	13	21118	0.00965825	0.142857	query_1	['GO:0009790', 'GO:0060429']
926	GO:BP	GO:0060765	regulation of androgen receptor signaling pathway	1	FALSE	"Any process that modulates the rate, frequency, or extent of the androgen receptor signaling pathway." [GOC:dph]	26	1346	3	21118	0.00222883	0.115385	query_1	['GO:0030521', 'GO:0033143']
927	GO:BP	GO:0060764	cell-cell signaling involved in mammary gland development	1	FALSE	"Any process that mediates the transfer of information from one cell to another and contributes to the progression of the mammary gland, from its initial state to the mature structure." [GOC:dph]	2	1346	1	21118	0.000742942	0.5	query_1	['GO:0007267', 'GO:0030879']
928	GO:BP	GO:0061088	regulation of sequestering of zinc ion	1	FALSE	"Any process that modulates the rate, frequency, or extent of sequestering of zinc ion. Sequestering of zinc ion is the process of binding or confining zinc ions such that they are separated from other components of a biological system." [GOC:BHF, GOC:dph, GOC:tb]	5	1346	1	21118	0.000742942	0.2	query_1	['GO:0032119', 'GO:0032879', 'GO:0050794', 'GO:0050801']
929	GO:BP	GO:0061054	dermatome development	1	FALSE	"The progression of the dermatome over time, from its initial formation to the mature structure. The dermatome is the portion of a somite that will form skin." [GOC:dph]	4	1346	1	21118	0.000742942	0.25	query_1	['GO:0048856', 'GO:0061053']
930	GO:BP	GO:0071725	response to triacyl bacterial lipopeptide	1	FALSE	"Any process that results in a change in state or activity of a cell or an organism (in terms of movement, secretion, enzyme production, gene expression, etc.) as a result of a triacylated bacterial lipopeptide stimulus." [GOC:add, PMID:12077222, PMID:12524386, PMID:2757794]	3	1346	1	21118	0.000742942	0.333333	query_1	['GO:0070339']
931	GO:BP	GO:0071515	genetic imprinting at mating-type locus	1	FALSE	"A genetic imprinting process in which a stable single-strand DNA lesion triggers programmed gene conversion at the mating-type locus, thereby restricting mating-type interconversion to one of the two sister chromatids during DNA replication." [GOC:mah, PMID:14765111, PMID:18723894]	3	1346	1	21118	0.000742942	0.333333	query_1	['GO:0006259', 'GO:0031494', 'GO:0071514']
932	GO:BP	GO:0071726	cellular response to diacyl bacterial lipopeptide	1	FALSE	"Any process that results in a change in state or activity of a cell (in terms of movement, secretion, enzyme production, gene expression, etc.) as a result of a diacylated bacterial lipopeptide stimulus." [GOC:add, PMID:12077222, PMID:12524386, PMID:2757794]	4	1346	1	21118	0.000742942	0.25	query_1	['GO:0071221', 'GO:0071724']
933	GO:BP	GO:0061072	iris morphogenesis	1	FALSE	"The process in which the iris is generated and organized. The iris is an anatomical structure in the eye whose opening forms the pupil. The iris is responsible for controlling the diameter and size of the pupil and the amount of light reaching the retina." [GOC:dph]	7	1346	2	21118	0.00148588	0.285714	query_1	['GO:0009653', 'GO:0048593']
934	GO:BP	GO:0061077	chaperone-mediated protein folding	1	FALSE	"The process of inhibiting aggregation and assisting in the covalent and noncovalent assembly of single chain polypeptides or multisubunit complexes into the correct tertiary structure that is dependent on interaction with a chaperone." [GOC:dph, GOC:vw]	58	1346	4	21118	0.00297177	0.0689655	query_1	['GO:0006457']
935	GO:BP	GO:0061078	positive regulation of prostaglandin secretion involved in immune response	1	FALSE	"Any process that activates or increases the frequency, rate or extent of the regulated release of a prostaglandin from a cell and contributes to the immune response." [GOC:BHF, GOC:dph]	1	1346	1	21118	0.000742942	1	query_1	['GO:0002702', 'GO:0032308', 'GO:0090323']
936	GO:BP	GO:0061081	positive regulation of myeloid leukocyte cytokine production involved in immune response	1	FALSE	"Any process that modulates the rate, frequency, or extent of the production of a cytokine that contributes to the immune response." [GOC:BHF, GOC:dph]	21	1346	4	21118	0.00297177	0.190476	query_1	['GO:0002720', 'GO:0061082']
937	GO:BP	GO:0060739	mesenchymal-epithelial cell signaling involved in prostate gland development	1	FALSE	"Any process that mediates the transfer of information from a mesenchymal cell to an epithelial cell where it is received and interpreted contributing to the progression of the prostate gland over time." [GOC:dph]	1	1346	1	21118	0.000742942	1	query_1	['GO:0022414', 'GO:0030850', 'GO:0060638']
938	GO:BP	GO:0061085	regulation of histone H3-K27 methylation	1	FALSE	"Any process that modulates the rate, frequency, or extent of histone H3-K27 methylation. Histone H3-K27 methylation is the modification of histone H3 by addition of a methyl group to lysine at position 27 of the histone." [GOC:dph, GOC:tb]	11	1346	2	21118	0.00148588	0.181818	query_1	['GO:0031060', 'GO:0070734']
939	GO:BP	GO:0071514	genetic imprinting	1	FALSE	"Any process that modulates the frequency, rate or extent of the chemical reactions and pathways involving macromolecules by a mechanism that is mediated by DNA, is mitotically or meiotically heritable, or is stably self-propagated in the cytoplasm of a resting cell, and does not entail a change in DNA sequence." [GOC:mah, GOC:vw]	29	1346	3	21118	0.00222883	0.103448	query_1	['GO:0006139', 'GO:0060255']
940	GO:BP	GO:0061086	negative regulation of histone H3-K27 methylation	1	FALSE	"Any process that decreases the rate, frequency, or extent of histone H3-K27 methylation. Histone H3-K27 methylation is the modification of histone H3 by addition of a methyl group to lysine at position 27 of the histone." [GOC:dph, GOC:tb]	5	1346	2	21118	0.00148588	0.4	query_1	['GO:0031061', 'GO:0061085', 'GO:0070734']
941	GO:BP	GO:0060761	negative regulation of response to cytokine stimulus	1	FALSE	"Any process that decreases the rate, frequency, or extent of a response to cytokine stimulus." [GOC:BHF, GOC:dph, GOC:tb]	64	1346	2	21118	0.00148588	0.03125	query_1	['GO:0034097', 'GO:0048585', 'GO:0060759']
942	GO:BP	GO:0060760	positive regulation of response to cytokine stimulus	1	FALSE	"Any process that increases the rate, frequency, or extent of a response to cytokine stimulus." [GOC:BHF, GOC:dph, GOC:tb]	56	1346	4	21118	0.00297177	0.0714286	query_1	['GO:0034097', 'GO:0048584', 'GO:0060759']
943	GO:BP	GO:0061087	positive regulation of histone H3-K27 methylation	1	FALSE	"Any process that increases the rate, frequency, or extent of histone H3-K27 methylation. Histone H3-K27 methylation is the modification of histone H3 by addition of a methyl group to lysine at position 27 of the histone." [GOC:dph, GOC:tb]	7	1346	2	21118	0.00148588	0.285714	query_1	['GO:0031062', 'GO:0061085', 'GO:0070734']
944	GO:BP	GO:0061056	sclerotome development	1	FALSE	"The progression of the sclerotome over time, from its initial formation to the mature structure. The sclerotome is the portion of the somite that will give rise to a vertebra." [GOC:dph]	5	1346	2	21118	0.00148588	0.4	query_1	['GO:0060485', 'GO:0061053']
945	GO:BP	GO:0061115	lung proximal/distal axis specification	1	FALSE	"The establishment, maintenance and elaboration of the proximal/distal axis of the lung. The proximal/distal axis of the lung is defined by a line that runs from the trachea to the alveoli." [GOC:dph]	1	1346	1	21118	0.000742942	1	query_1	['GO:0009946', 'GO:0060432']
946	GO:BP	GO:0071799	cellular response to prostaglandin D stimulus	1	FALSE	"Any process that results in a change in state or activity of a cell (in terms of movement, secretion, enzyme production, gene expression, etc.) as a result of a prostagladin D stimulus." [GOC:sl]	4	1346	1	21118	0.000742942	0.25	query_1	['GO:0071379', 'GO:0071798', 'GO:0097306', 'GO:1901655']
947	GO:BP	GO:0071763	nuclear membrane organization	1	FALSE	"A process that is carried out at the cellular level which results in the assembly, arrangement of constituent parts, or disassembly of the nuclear inner or outer membrane." [GOC:mah]	23	1346	1	21118	0.000742942	0.0434783	query_1	['GO:0006998', 'GO:0061024']
948	GO:BP	GO:0061155	pulmonary artery endothelial tube morphogenesis	1	FALSE	"The process in which the anatomical structures of a tube are generated and organized from the pulmonary artery endothelium. An pulmonary artery endothelium is an epithelium that lines the pulmonary artery." [GOC:dph, GOC:yaf]	1	1346	1	21118	0.000742942	1	query_1	['GO:0061154', 'GO:0061156']
949	GO:BP	GO:0060687	regulation of branching involved in prostate gland morphogenesis	1	FALSE	"Any process that modulates the rate, frequency, or extent of prostate gland branching, the process in which the branching structure of the prostate gland is generated and organized. A branch is a division or offshoot from a main stem." [GOC:dph]	6	1346	3	21118	0.00222883	0.5	query_1	['GO:0060442', 'GO:0060688', 'GO:1905330', 'GO:2000241']
950	GO:BP	GO:0060686	negative regulation of prostatic bud formation	1	FALSE	"Any process that decreases the rate, frequency, or extent of prostatic bud formation, the morphogenetic process in which a region of the fetal urogenital sinus epithelium is specified to become the prostate, resulting in prostate bud outgrowth." [GOC:dph]	4	1346	2	21118	0.00148588	0.5	query_1	['GO:0060513', 'GO:0060685', 'GO:1905331', 'GO:2000242']
951	GO:BP	GO:0061156	pulmonary artery morphogenesis	1	FALSE	"The process in which the anatomical structures of the pulmonary artery are generated and organized. The pulmonary artery is the artery that carries blood from the heart to the lungs." [GOC:dph, GOC:yaf]	7	1346	1	21118	0.000742942	0.142857	query_1	['GO:0048844']
952	GO:BP	GO:0071826	ribonucleoprotein complex subunit organization	1	FALSE	"Any process in which macromolecules aggregate, disaggregate, or are modified, resulting in the formation, disassembly, or alteration of a ribonucleoprotein complex." [GOC:mah]	188	1346	10	21118	0.00742942	0.0531915	query_1	['GO:0043933']
953	GO:BP	GO:0071827	plasma lipoprotein particle organization	1	FALSE	"A protein-lipid complex subunit organization process that results in the formation, disassembly, or alteration of a plasma lipoprotein particle. A plasma lipoprotein particle is a spherical particle with a hydrophobic core of triglycerides and/or cholesterol esters, surrounded by an amphipathic monolayer of phospholipids, cholesterol and apolipoproteins." [GOC:BHF, GOC:mah]	36	1346	5	21118	0.00371471	0.138889	query_1	['GO:0032501', 'GO:0071825']
954	GO:BP	GO:0071830	triglyceride-rich lipoprotein particle clearance	1	FALSE	"The process in which a triglyceride-rich lipoprotein particle is removed from the blood via receptor-mediated endocytosis and its constituent parts degraded." [GOC:BHF]	7	1346	1	21118	0.000742942	0.142857	query_1	['GO:0034381']
955	GO:BP	GO:0071831	intermediate-density lipoprotein particle clearance	1	FALSE	"The process in which a intermediate-density lipoprotein particle is removed from the blood via receptor-mediated endocytosis and its constituent parts degraded." [GOC:BHF]	1	1346	1	21118	0.000742942	1	query_1	['GO:0071830']
956	GO:BP	GO:0060685	regulation of prostatic bud formation	1	FALSE	"Any process that modulates the rate, frequency, or extent of prostatic bud formation, the morphogenetic process in which a region of the fetal urogenital sinus epithelium is specified to become the prostate, resulting in prostate bud outgrowth." [GOC:dph]	6	1346	2	21118	0.00148588	0.333333	query_1	['GO:0003156', 'GO:0060513', 'GO:0060688', 'GO:1905330', 'GO:2000241']
957	GO:BP	GO:0060684	epithelial-mesenchymal cell signaling	1	FALSE	"Any process that results in the transfer of information from an epithelial cell to a mesenchymal cell where it is interpreted." [GOC:dph]	5	1346	2	21118	0.00148588	0.4	query_1	['GO:0007267']
958	GO:BP	GO:0060682	primary ureteric bud growth	1	FALSE	"The process in which the primary ureteric bud grows along its axis dorsally toward the metanephric blastema." [GOC:dph, PMID:16916378]	1	1346	1	21118	0.000742942	1	query_1	['GO:0060560', 'GO:0060677']
959	GO:BP	GO:0061157	mRNA destabilization	1	FALSE	"Any process that decreases the stability of an mRNA molecule, making it more vulnerable to degradative processes. Messenger RNA is the intermediate molecule between DNA and protein. It includes UTR and coding sequences. It does not contain introns." [GOC:dph, GOC:jh]	74	1346	10	21118	0.00742942	0.135135	query_1	['GO:0017148', 'GO:0043488', 'GO:0050779', 'GO:0061014']
960	GO:BP	GO:0061158	3'-UTR-mediated mRNA destabilization	1	FALSE	"An mRNA destabilization process in which one or more RNA-binding proteins associate with the 3'-untranslated region (UTR) of an mRNA." [GOC:dph, GOC:jh]	16	1346	3	21118	0.00222883	0.1875	query_1	['GO:0061157']
961	GO:BP	GO:0060681	branch elongation involved in ureteric bud branching	1	FALSE	"The growth of a branch of the ureteric bud along its axis." [GOC:dph, PMID:16916378]	5	1346	1	21118	0.000742942	0.2	query_1	['GO:0001658', 'GO:0060602', 'GO:0060677']
962	GO:BP	GO:0060693	regulation of branching involved in salivary gland morphogenesis	1	FALSE	"Any process that modulates the rate, frequency, or extent of branching morphogenesis in the salivary gland epithelium." [GOC:dph]	8	1346	3	21118	0.00222883	0.375	query_1	['GO:0060445', 'GO:0060688', 'GO:1905330', 'GO:2000027']
963	GO:BP	GO:0071500	cellular response to nitrosative stress	1	FALSE	"Any process that results in a change in state or activity of a cell (in terms of movement, secretion, enzyme production, gene expression, etc.) as a result of a nitrosative stress stimulus. Nitrosative stress is a state often resulting from exposure to high levels of nitric oxide (NO) or the highly reactive oxidant peroxynitrite, which is produced following interaction of NO with superoxide anio…	6	1346	1	21118	0.000742942	0.166667	query_1	['GO:0051409', 'GO:0062197']
964	GO:BP	GO:0061178	regulation of insulin secretion involved in cellular response to glucose stimulus	1	FALSE	"Any process that modulates the frequency, rate or extent of the regulated release of insulin that contributes to the response of a cell to glucose." [GOC:BHF, GOC:dph]	86	1346	8	21118	0.00594354	0.0930233	query_1	['GO:0035773', 'GO:0050796', 'GO:0060341']
965	GO:BP	GO:0060677	ureteric bud elongation	1	FALSE	"The developmental growth in which the ureteric bud grows along its axis beginning with the growth of the primary ureteric bud and ending when the branches of the bud have elongated." [GOC:dph, PMID:16916378]	8	1346	3	21118	0.00222883	0.375	query_1	['GO:0060560', 'GO:0060675']
966	GO:BP	GO:0071499	cellular response to laminar fluid shear stress	1	FALSE	"Any process that results in a change in state or activity of a cell (in terms of movement, secretion, enzyme production, gene expression, etc.) as a result of a laminar fluid shear stress stimulus. Laminar fluid flow is the force acting on an object in a system where the fluid is moving across a solid surface in parallel layers." [GOC:mah]	7	1346	1	21118	0.000742942	0.142857	query_1	['GO:0034616', 'GO:0071498']
967	GO:BP	GO:0060676	ureteric bud formation	1	FALSE	"The developmental process pertaining to the initial formation of the ureteric bud from the Wolffian duct. This process begins when the bud protrudes from the duct and ends when it is a recognizable bud." [GOC:dph, PMID:16916378]	7	1346	1	21118	0.000742942	0.142857	query_1	['GO:0060675', 'GO:0072172']
968	GO:BP	GO:0071498	cellular response to fluid shear stress	1	FALSE	"Any process that results in a change in state or activity of a cell (in terms of movement, secretion, enzyme production, gene expression, etc.) as a result of a fluid shear stress stimulus. Fluid shear stress is the force acting on an object in a system where the fluid is moving across a solid surface." [GOC:mah]	19	1346	3	21118	0.00222883	0.157895	query_1	['GO:0033554', 'GO:0034405']
969	GO:BP	GO:0071838	cell proliferation in bone marrow	1	FALSE	"The multiplication or reproduction of cells, resulting in the expansion of a cell population in the bone marrow." [GOC:mah, GOC:yaf, PMID:17063141]	12	1346	2	21118	0.00148588	0.166667	query_1	['GO:0008283']
970	GO:BP	GO:0071839	apoptotic process in bone marrow cell	1	FALSE	"The apoptotic process in cells in the bone marrow." [GOC:mah, GOC:mtg_apoptosis, PMID:17063141]	7	1346	1	21118	0.000742942	0.142857	query_1	['GO:0006915']
971	GO:BP	GO:0071496	cellular response to external stimulus	1	FALSE	"Any process that results in a change in state or activity of a cell (in terms of movement, secretion, enzyme production, gene expression, etc.) as a result of an external stimulus." [GOC:mah]	322	1346	36	21118	0.0267459	0.111801	query_1	['GO:0009605']
972	GO:BP	GO:0061179	negative regulation of insulin secretion involved in cellular response to glucose stimulus	1	FALSE	"Any process that decreases the frequency, rate or extent of the regulated release of insulin that contributes to the response of a cell to glucose." [GOC:BHF, GOC:dph]	23	1346	3	21118	0.00222883	0.130435	query_1	['GO:0035773', 'GO:0046676', 'GO:0048585', 'GO:0061178']
973	GO:BP	GO:0060674	placenta blood vessel development	1	FALSE	"The process whose specific outcome is the progression of a blood vessel of the placenta over time, from its formation to the mature structure." [GOC:dph, PMID:16916377]	35	1346	6	21118	0.00445765	0.171429	query_1	['GO:0001568', 'GO:0001890', 'GO:0003006']
974	GO:BP	GO:0071494	cellular response to UV-C	1	FALSE	"Any process that results in a change in state or activity of a cell (in terms of movement, secretion, enzyme production, gene expression, etc.) as a result of a UV-C radiation stimulus. UV-C radiation (UV-C light) spans the wavelengths 100 to 280 nm." [GOC:mah]	6	1346	2	21118	0.00148588	0.333333	query_1	['GO:0010225', 'GO:0034644']
975	GO:BP	GO:0061181	regulation of chondrocyte development	1	FALSE	"Any process that modulates the rate, frequency, or extent of the process whose specific outcome is the progression of a chondrocyte over time, from its commitment to its mature state. Chondrocyte development does not include the steps involved in committing a chondroblast to a chondrocyte fate." [GOC:BHF, GOC:dph]	5	1346	1	21118	0.000742942	0.2	query_1	['GO:0002063', 'GO:0032330', 'GO:0060284']
976	GO:BP	GO:0061183	regulation of dermatome development	1	FALSE	"Any process that modulates the rate, frequency, or extent of the progression of the dermatome over time, from its initial formation to the mature structure. The dermatome is the portion of a somite that will form skin." [GOC:BHF, GOC:dph]	4	1346	1	21118	0.000742942	0.25	query_1	['GO:0050793', 'GO:0061054']
977	GO:BP	GO:0061185	negative regulation of dermatome development	1	FALSE	"Any process that decreases the rate, frequency, or extent of the progression of the dermatome over time, from its initial formation to the mature structure. The dermatome is the portion of a somite that will form skin." [GOC:BHF, GOC:dph]	1	1346	1	21118	0.000742942	1	query_1	['GO:0045992', 'GO:0061054', 'GO:0061183']
978	GO:BP	GO:0061162	establishment of monopolar cell polarity	1	FALSE	"The specification and formation of monopolar intracellular organization or cell growth patterns. Monopolar cell organization is directional organization along an axis." [GOC:dph, GOC:vw]	26	1346	1	21118	0.000742942	0.0384615	query_1	['GO:0030010', 'GO:0061339']
979	GO:BP	GO:0060737	prostate gland morphogenetic growth	1	FALSE	"The differential increase in size or mass of the prostate gland that contributes to the gland attaining its form." [GOC:dph]	3	1346	1	21118	0.000742942	0.333333	query_1	['GO:0060512', 'GO:0060560', 'GO:0060736']
980	GO:BP	GO:0060696	regulation of phospholipid catabolic process	1	FALSE	"Any process that modulates the rate, frequency, or extent of phospholipid catabolism, the chemical reactions and pathways resulting in the breakdown of phospholipids, any lipid containing phosphoric acid as a mono- or diester." [GOC:BHF, GOC:dph, GOC:tb]	7	1346	1	21118	0.000742942	0.142857	query_1	['GO:0009395', 'GO:0031329', 'GO:0050994', 'GO:1903725']
981	GO:BP	GO:0061154	endothelial tube morphogenesis	1	FALSE	"The process in which the anatomical structures of a tube are generated and organized from an endothelium. Endothelium refers to the layer of cells lining blood vessels, lymphatics, the heart, and serous cavities, and is derived from bone marrow or mesoderm. Corneal endothelium is a special case, derived from neural crest cells." [GOC:dph, GOC:yaf]	18	1346	2	21118	0.00148588	0.111111	query_1	['GO:0003159', 'GO:0060562']
982	GO:BP	GO:0061117	negative regulation of heart growth	1	FALSE	"Any process that decreases the rate or extent of heart growth. Heart growth is the increase in size or mass of the heart." [GOC:dph, GOC:hjd]	35	1346	6	21118	0.00445765	0.171429	query_1	['GO:0046621', 'GO:0060419', 'GO:0060420']
983	GO:BP	GO:0060736	prostate gland growth	1	FALSE	"The increase in size or mass of the prostate gland where the increase in size or mass has the specific outcome of the progression of the gland, from its formation to its mature state." [GOC:dph]	11	1346	3	21118	0.00222883	0.272727	query_1	['GO:0003006', 'GO:0030850', 'GO:0035265']
984	GO:BP	GO:0061136	regulation of proteasomal protein catabolic process	1	FALSE	"Any process that modulates the rate, frequency, or extent of the chemical reactions and pathways resulting in the breakdown of a protein or peptide by hydrolysis of its peptide bonds that is mediated by the proteasome." [GOC:dph, GOC:tb]	187	1346	13	21118	0.00965825	0.0695187	query_1	['GO:0010498', 'GO:1903050']
985	GO:BP	GO:0071786	endoplasmic reticulum tubular network organization	1	FALSE	"A process that is carried out at the cellular level which results in the assembly, arrangement of constituent parts, or disassembly of the endoplasmic reticulum (ER) tubular network. The ER tubular network is the ER part that that has membranes with high curvature in cross-section." [GOC:vw, PMID:16469703, PMID:20434336]	19	1346	2	21118	0.00148588	0.105263	query_1	['GO:0007029']
986	GO:BP	GO:0071798	response to prostaglandin D	1	FALSE	"Any process that results in a change in state or activity of a cell or an organism (in terms of movement, secretion, enzyme production, gene expression, etc.) as a result of a prostagladin D stimulus." [GOC:sl]	4	1346	1	21118	0.000742942	0.25	query_1	['GO:0034694', 'GO:0097305', 'GO:1901654']
987	GO:BP	GO:0061049	cell growth involved in cardiac muscle cell development	1	FALSE	"The growth of a cardiac muscle cell, where growth contributes to the progression of the cell over time from its initial formation to its mature state." [GOC:dph]	46	1346	5	21118	0.00371471	0.108696	query_1	['GO:0003301', 'GO:0048588', 'GO:0055013']
988	GO:BP	GO:0071503	response to heparin	1	FALSE	"Any process that results in a change in state or activity of a cell or an organism (in terms of movement, secretion, enzyme production, gene expression, etc.) as a result of a heparin stimulus." [GOC:mah, GOC:yaf]	5	1346	2	21118	0.00148588	0.4	query_1	['GO:0010243', 'GO:1901700']
989	GO:BP	GO:0060732	positive regulation of inositol phosphate biosynthetic process	1	FALSE	"Any process that increases the rate, frequency or extent of inositol phosphate biosynthesis. Inositol phosphate biosynthetic processes are the chemical reactions and pathways resulting in the formation of an inositol phosphate, 1,2,3,4,5,6-cyclohexanehexol, with one or more phosphate groups attached." [GOC:dph, GOC:tb]	15	1346	1	21118	0.000742942	0.0666667	query_1	['GO:0010676', 'GO:0010919', 'GO:0031328', 'GO:0032958', 'GO:0045937', 'GO:1902932']
990	GO:BP	GO:0061140	lung secretory cell differentiation	1	FALSE	"The process in which a relatively unspecialized cell acquires specialized features of a lung secretory cell. A lung secretory cell is a specialized epithelial cell of the lung that contains large secretory granules in its apical part." [GOC:dph]	12	1346	1	21118	0.000742942	0.0833333	query_1	['GO:0060487']
991	GO:BP	GO:0060729	intestinal epithelial structure maintenance	1	FALSE	"A tissue homeostatic process required for the maintenance of the structure of the intestinal epithelium." [GOC:BHF, GOC:dph, GOC:tb]	6	1346	1	21118	0.000742942	0.166667	query_1	['GO:0030277']
992	GO:BP	GO:0060717	chorion development	1	FALSE	"The biological process whose specific outcome is the progression of a chorion from an initial condition to its mature state. This process begins with the formation of the structure and ends with the mature structure. The chorion is an extraembryonic membrane." [GOC:dph]	10	1346	1	21118	0.000742942	0.1	query_1	['GO:1903867']
993	GO:BP	GO:0071502	cellular response to temperature stimulus	1	FALSE	"Any process that results in a change in state or activity of a cell (in terms of movement, secretion, enzyme production, gene expression, etc.) as a result of a temperature stimulus." [GOC:mah]	5	1346	1	21118	0.000742942	0.2	query_1	['GO:0009266']
994	GO:BP	GO:0060716	labyrinthine layer blood vessel development	1	FALSE	"The process whose specific outcome is the progression of a blood vessel of the labyrinthine layer of the placenta over time, from its formation to the mature structure. The embryonic vessels grow through the layer to come in close contact with the maternal blood supply." [GOC:dph]	24	1346	2	21118	0.00148588	0.0833333	query_1	['GO:0048568', 'GO:0048608', 'GO:0060674', 'GO:0060711']
995	GO:BP	GO:0071501	cellular response to sterol depletion	1	FALSE	"Any process that results in a change in state or activity of a cell (in terms of movement, secretion, enzyme production, gene expression, etc.) as a result of a stimulus indicating deprivation of sterols. Sterols are a group of steroids characterized by the presence of one or more hydroxyl groups and a hydrocarbon side-chain in the molecule." [GOC:mah]	15	1346	4	21118	0.00297177	0.266667	query_1	['GO:0006991', 'GO:0033554']
996	GO:BP	GO:0060706	cell differentiation involved in embryonic placenta development	1	FALSE	"The process in which a relatively unspecialized cell acquires specialized features of the embryonic placenta." [GOC:dph]	31	1346	4	21118	0.00297177	0.129032	query_1	['GO:0001892', 'GO:0003006', 'GO:0030154']
997	GO:BP	GO:0061145	lung smooth muscle development	1	FALSE	"The process whose specific outcome is the progression of smooth muscle in the lung over time, from its formation to the mature structure." [GOC:dph]	2	1346	2	21118	0.00148588	1	query_1	['GO:0030324', 'GO:0048745']
998	GO:BP	GO:0061149	BMP signaling pathway involved in ureter morphogenesis	1	FALSE	"A series of molecular signals initiated by the binding of a member of the BMP (bone morphogenetic protein) family to a receptor on the surface of a target cell, which contributes to the shaping of the ureter. The ureter is a tube that extends from the kidney to the bladder." [GOC:dph, GOC:mtg_kidney_jan10]	1	1346	1	21118	0.000742942	1	query_1	['GO:0030509', 'GO:0072197']
999	GO:BP	GO:0061150	renal system segmentation	1	FALSE	"The regionalization process that divides an the renal system into a series of segments along its proximal/distal axis." [GOC:dph, GOC:yaf]	1	1346	1	21118	0.000742942	1	query_1	['GO:0035282', 'GO:0072048']
1000	GO:BP	GO:0071806	protein transmembrane transport	1	FALSE	"The process in which a protein is transported across a membrane." [GOC:mah, GOC:vw]	60	1346	1	21118	0.000742942	0.0166667	query_1	['GO:0015031', 'GO:0055085']
1001	GO:BP	GO:0061151	BMP signaling pathway involved in renal system segmentation	1	FALSE	"A series of molecular signals initiated by the binding of a member of the BMP (bone morphogenetic protein) family to a receptor on the surface of a target cell, which contributes to the segmentation of the renal system." [GOC:dph, GOC:yaf]	1	1346	1	21118	0.000742942	1	query_1	['GO:0030509', 'GO:0061150']
1002	GO:BP	GO:0060713	labyrinthine layer morphogenesis	1	FALSE	"The process in which the labyrinthine layer of the placenta is generated and organized." [GOC:dph]	23	1346	5	21118	0.00371471	0.217391	query_1	['GO:0003006', 'GO:0048598', 'GO:0060669', 'GO:0060711']
1003	GO:BP	GO:0061152	trachea submucosa development	1	FALSE	"The progression of the trachea submucosa over time from its formation to the mature structure. The trachea submucosa is made up of the glands and elastic tissue that lie under the mucosa in the trachea." [GOC:dph, GOC:yaf]	2	1346	1	21118	0.000742942	0.5	query_1	['GO:0048856', 'GO:0060438']
1004	GO:BP	GO:0060712	spongiotrophoblast layer development	1	FALSE	"The process in which the spongiotrophoblast layer of the placenta progresses from its formation to its mature state." [GOC:dph]	18	1346	3	21118	0.00222883	0.166667	query_1	['GO:0001892', 'GO:0009888', 'GO:0048608']
1005	GO:BP	GO:0071824	protein-DNA complex subunit organization	1	FALSE	"Any process in which macromolecules aggregate, disaggregate, or are modified, resulting in the formation, disassembly, or alteration of a protein-DNA complex." [GOC:mah]	219	1346	24	21118	0.0178306	0.109589	query_1	['GO:0043933']
1006	GO:BP	GO:0071825	protein-lipid complex subunit organization	1	FALSE	"Any process in which macromolecules aggregate, disaggregate, or are modified, resulting in the formation, disassembly, or alteration of a protein-lipid complex." [GOC:mah]	40	1346	5	21118	0.00371471	0.125	query_1	['GO:0043933']
1007	GO:BP	GO:0060711	labyrinthine layer development	1	FALSE	"The process in which the labyrinthine layer of the placenta progresses, from its formation to its mature state." [GOC:dph]	53	1346	8	21118	0.00594354	0.150943	query_1	['GO:0001892', 'GO:0048608']
1008	GO:BP	GO:0060710	chorio-allantoic fusion	1	FALSE	"The cell-cell adhesion process in which the cells of the chorion fuse to the cells of the allantois." [GOC:dph]	8	1346	3	21118	0.00222883	0.375	query_1	['GO:0022414', 'GO:0060713', 'GO:0098609']
1009	GO:BP	GO:0060708	spongiotrophoblast differentiation	1	FALSE	"The process in which a relatively unspecialized cell of the ectoplacental cone acquires specialized features of a spongiotrophoblast of the placenta. A spongiotrophoblast cell is a basophilic cell." [GOC:dph, PMID:16269175]	5	1346	1	21118	0.000742942	0.2	query_1	['GO:0060706', 'GO:0060712']
1010	GO:BP	GO:0060707	trophoblast giant cell differentiation	1	FALSE	"The process in which a relatively unspecialized cell acquires specialized features of a trophoblast giant cell of the placenta. Trophoblast giant cells are the cell of the placenta that line the maternal decidua." [GOC:dph, PMID:16269175]	18	1346	4	21118	0.00297177	0.222222	query_1	['GO:0060706']
1011	GO:BP	GO:0061153	trachea gland development	1	FALSE	"The progression of a trachea gland over time, from its formation to the mature structure. Trachea glands are found under the mucus of the trachea and secrete mucus, and agents that help protect the lung from injury and infection." [GOC:dph]	2	1346	1	21118	0.000742942	0.5	query_1	['GO:0048732', 'GO:0061152']
1012	GO:BP	GO:0071805	potassium ion transmembrane transport	1	FALSE	"A process in which a potassium ion is transported from one side of a membrane to the other." [GOC:mah]	214	1346	15	21118	0.0111441	0.0700935	query_1	['GO:0006813', 'GO:0098662']
1013	GO:BP	GO:0060795	cell fate commitment involved in formation of primary germ layer	1	FALSE	"The commitment of cells to specific cell fates of the endoderm, ectoderm, or mesoderm as a part of gastrulation." [GOC:dph, GOC:sdb_2009, GOC:tb]	32	1346	8	21118	0.00594354	0.25	query_1	['GO:0001704', 'GO:0045165']
1014	GO:BP	GO:0060935	cardiac fibroblast cell differentiation	1	FALSE	"The process in which a relatively unspecialized cell acquires the specialized structural and/or functional features of a cardiac fibroblast. A cardiac fibroblast is a connective tissue cell in the heart which secretes an extracellular matrix rich in collagen and other macromolecules." [GOC:mtg_heart]	2	1346	1	21118	0.000742942	0.5	query_1	['GO:0035051']
1015	GO:BP	GO:0071715	icosanoid transport	1	FALSE	"The directed movement of icosanoids into, out of or within a cell, or between cells, by means of some agent such as a transporter or pore. Icosanoids are unsaturated C20 fatty acids and skeletally related compounds." [GOC:mah]	58	1346	3	21118	0.00222883	0.0517241	query_1	['GO:0046942']
1016	GO:BP	GO:0060969	negative regulation of gene silencing	1	FALSE	"Any process that decreases the rate, frequency, or extent of gene silencing, the transcriptional or post-transcriptional process carried out at the cellular level that results in long-term gene inactivation." [GOC:dph, GOC:tb]	31	1346	4	21118	0.00297177	0.129032	query_1	['GO:0010628', 'GO:0016458', 'GO:0048523', 'GO:0060968']
1017	GO:BP	GO:0071638	negative regulation of monocyte chemotactic protein-1 production	1	FALSE	"Any process that stops, prevents, or reduces the frequency, rate, or extent of production of monocyte chemotactic protein-1." [GOC:mah]	7	1346	1	21118	0.000742942	0.142857	query_1	['GO:0032682', 'GO:0071605', 'GO:0071637']
1018	GO:BP	GO:0060971	embryonic heart tube left/right pattern formation	1	FALSE	"The pattern specification process that results in the subdivision of the left/right axis of the embryonic heart tube in space to define an area or volume in which specific patterns of cell differentiation will take place." [GOC:mtg_heart]	6	1346	1	21118	0.000742942	0.166667	query_1	['GO:0035050', 'GO:0060972']
1019	GO:BP	GO:0060915	mesenchymal cell differentiation involved in lung development	1	FALSE	"The process in which a relatively unspecialized cell acquires specialized features of a mesenchymal cell of the lung. A mesenchymal cell is a loosely associated cell that is part of the connective tissue in an organism. Mesenchymal cells give rise to more mature connective tissue cell types." [GOC:dph]	1	1346	1	21118	0.000742942	1	query_1	['GO:0030324', 'GO:0048762']
1020	GO:BP	GO:0071600	otic vesicle morphogenesis	1	FALSE	"The process in which the anatomical structures of the otic vesicle are generated and organized. The otic vesicle is a transient embryonic structure formed during development of the vertebrate inner ear." [GOC:mah]	8	1346	3	21118	0.00222883	0.375	query_1	['GO:0042472', 'GO:0048562', 'GO:0060562', 'GO:0071599']
1021	GO:BP	GO:0060913	cardiac cell fate determination	1	FALSE	"The process involved in cardiac cell fate commitment. Once determination has taken place, a cell becomes committed to differentiate down a particular pathway regardless of its environment." [GOC:mtg_heart]	4	1346	1	21118	0.000742942	0.25	query_1	['GO:0001709', 'GO:0060911']
1022	GO:BP	GO:0060972	left/right pattern formation	1	FALSE	"The pattern specification process that results in the subdivision of the left/right axis in space to define an area or volume in which specific patterns of cell differentiation will take place or in which cells interpret a specific environment." [GOC:mtg_heart]	22	1346	4	21118	0.00297177	0.181818	query_1	['GO:0003002']
1023	GO:BP	GO:0060973	cell migration involved in heart development	1	FALSE	"The orderly movement of a cell from one site to another that will contribute to the progression of the heart over time, from its initial formation, to the mature organ." [GOC:mtg_heart]	17	1346	6	21118	0.00445765	0.352941	query_1	['GO:0007507', 'GO:0016477']
1024	GO:BP	GO:0060911	cardiac cell fate commitment	1	FALSE	"The commitment of cells to specific cardiac cell fates and their capacity to differentiate into cardiac cells. Cardiac cells are cells that comprise the organ which pumps blood through the circulatory system." [GOC:mtg_heart]	16	1346	3	21118	0.00222883	0.1875	query_1	['GO:0035051', 'GO:0045165']
1025	GO:BP	GO:0071599	otic vesicle development	1	FALSE	"The process whose specific outcome is the progression of the otic vesicle over time, from its formation to the mature structure. The otic vesicle is a transient embryonic structure formed during development of the vertebrate inner ear." [GOC:mah]	13	1346	3	21118	0.00222883	0.230769	query_1	['GO:0007423', 'GO:0035295', 'GO:0048839', 'GO:0060429']
1026	GO:BP	GO:0071655	regulation of granulocyte colony-stimulating factor production	1	FALSE	"Any process that modulates the frequency, rate, or extent of production of granulocyte colony-stimulating factor." [GOC:mah]	4	1346	1	21118	0.000742942	0.25	query_1	['GO:0071611', 'GO:1901256']
1027	GO:BP	GO:0071657	positive regulation of granulocyte colony-stimulating factor production	1	FALSE	"Any process that activates or increases the frequency, rate, or extent of production of granulocyte colony-stimulating factor." [GOC:mah]	3	1346	1	21118	0.000742942	0.333333	query_1	['GO:0071611', 'GO:0071655', 'GO:1901258']
1028	GO:BP	GO:0060978	angiogenesis involved in coronary vascular morphogenesis	1	FALSE	"Blood vessel formation in the heart when new vessels emerge from the proliferation of pre-existing blood vessels." [GOC:mtg_heart]	7	1346	3	21118	0.00222883	0.428571	query_1	['GO:0001525', 'GO:0060977']
1029	GO:BP	GO:0060979	vasculogenesis involved in coronary vascular morphogenesis	1	FALSE	"The differentiation of endothelial cells from progenitor cells that contributes to blood vessel development in the heart, and the de novo formation of blood vessels and tubes." [GOC:mtg_heart]	14	1346	3	21118	0.00222883	0.214286	query_1	['GO:0001570', 'GO:0060977']
1030	GO:BP	GO:0071637	regulation of monocyte chemotactic protein-1 production	1	FALSE	"Any process that modulates the frequency, rate, or extent of production of monocyte chemotactic protein-1." [GOC:mah]	19	1346	1	21118	0.000742942	0.0526316	query_1	['GO:0032642', 'GO:0071605']
1031	GO:BP	GO:0060981	cell migration involved in coronary angiogenesis	1	FALSE	"The orderly movement of a cell from one site to another that will contribute to the formation of new blood vessels in the heart from pre-existing blood vessels." [GOC:mtg_heart]	1	1346	1	21118	0.000742942	1	query_1	['GO:0060973', 'GO:0060978']
1032	GO:BP	GO:0060983	epicardium-derived cardiac vascular smooth muscle cell differentiation	1	FALSE	"The process in which a relatively unspecialized cell derived from the epicardium acquires specialized features of a cardiac vascular smooth muscle cell. A cardiac vascular smooth muscle cell covers the heart vasculature and lacks transverse striations in its constituent fibers." [GOC:mtg_heart]	2	1346	1	21118	0.000742942	0.5	query_1	['GO:0060947']
1033	GO:BP	GO:0060986	endocrine hormone secretion	1	FALSE	"The regulated release of a hormone into the circulatory system." [GOC:dph]	60	1346	5	21118	0.00371471	0.0833333	query_1	['GO:0046879', 'GO:0050886']
1034	GO:BP	GO:0071670	smooth muscle cell chemotaxis	1	FALSE	"The directed movement of a smooth muscle cell in response to an external stimulus." [GOC:mah]	9	1346	2	21118	0.00148588	0.222222	query_1	['GO:0014909', 'GO:0060326']
1035	GO:BP	GO:0060992	response to fungicide	1	FALSE	"Any process that results in a change in state or activity of a cell or an organism (in terms of movement, secretion, enzyme production, gene expression, etc.) as a result of a fungicide stimulus. Fungicides are chemicals used to kill fungi." [GOC:dph]	8	1346	1	21118	0.000742942	0.125	query_1	['GO:0009636', 'GO:0046677']
1036	GO:BP	GO:0060907	positive regulation of macrophage cytokine production	1	FALSE	"Any process that increases the rate, frequency or extent of macrophage cytokine production. Macrophage cytokine production is the appearance of a chemokine due to biosynthesis or secretion following a cellular stimulus, resulting in an increase in its intracellular or extracellular levels." [GOC:dph, GOC:tb]	11	1346	1	21118	0.000742942	0.0909091	query_1	['GO:0010934', 'GO:0010935', 'GO:0061081']
1037	GO:BP	GO:0060900	embryonic camera-type eye formation	1	FALSE	"The developmental process pertaining to the initial formation of a camera-type eye from unspecified neurectoderm. This process begins with the differentiation of cells that form the optic field and ends when the optic cup has attained its shape." [GOC:dph, GOC:sdb_2009, GOC:tb]	9	1346	2	21118	0.00148588	0.222222	query_1	['GO:0048596', 'GO:0048646']
1038	GO:BP	GO:0071577	zinc ion transmembrane transport	1	FALSE	"A process in which a zinc II ion is transported from one side of a membrane to the other by means of some agent such as a transporter or pore." [GOC:BHF, GOC:mah]	24	1346	1	21118	0.000742942	0.0416667	query_1	['GO:0006829', 'GO:0098662']
1039	GO:BP	GO:0071671	regulation of smooth muscle cell chemotaxis	1	FALSE	"Any process that modulates the frequency, rate, or extent of smooth muscle cell chemotaxis." [GOC:mah]	7	1346	1	21118	0.000742942	0.142857	query_1	['GO:0014910', 'GO:0050920', 'GO:0071670']
1040	GO:BP	GO:0060996	dendritic spine development	1	FALSE	"The process whose specific outcome is the progression of the dendritic spine over time, from its formation to the mature structure. A dendritic spine is a protrusion from a dendrite and a specialized subcellular compartment involved in synaptic transmission." [GOC:dph]	123	1346	17	21118	0.01263	0.138211	query_1	['GO:0016358', 'GO:0048856']
1041	GO:BP	GO:0060997	dendritic spine morphogenesis	1	FALSE	"The process in which the anatomical structures of a dendritic spine are generated and organized. A dendritic spine is a protrusion from a dendrite and a specialized subcellular compartment involved in synaptic transmission." [GOC:dph]	72	1346	11	21118	0.00817236	0.152778	query_1	['GO:0031175', 'GO:0048812', 'GO:0048813', 'GO:0060996', 'GO:0097061']
1042	GO:BP	GO:0060998	regulation of dendritic spine development	1	FALSE	"Any process that modulates the rate, frequency, or extent of dendritic spine development, the process whose specific outcome is the progression of the dendritic spine over time, from its formation to the mature structure." [GOC:dph]	80	1346	12	21118	0.0089153	0.15	query_1	['GO:0050793', 'GO:0060996']
1043	GO:BP	GO:0071673	positive regulation of smooth muscle cell chemotaxis	1	FALSE	"Any process that activates or increases the frequency, rate, or extent of smooth muscle cell chemotaxis." [GOC:mah]	4	1346	1	21118	0.000742942	0.25	query_1	['GO:0014911', 'GO:0050921', 'GO:0071670', 'GO:0071671']
1044	GO:BP	GO:0060897	neural plate regionalization	1	FALSE	"The pattern specification process that results in the subdivision of an axis or axes of the neural plate in space to define an area or volume in which specific patterns of cell differentiation will take place or in which cells interpret a specific environment." [GOC:dph, GOC:sdb_2009, GOC:tb]	5	1346	1	21118	0.000742942	0.2	query_1	['GO:0003002', 'GO:0060896']
1045	GO:BP	GO:0060999	positive regulation of dendritic spine development	1	FALSE	"Any process that increases the rate, frequency, or extent of dendritic spine development, the process whose specific outcome is the progression of the dendritic spine over time, from its formation to the mature structure." [GOC:dph]	59	1346	8	21118	0.00594354	0.135593	query_1	['GO:0051094', 'GO:0060996', 'GO:0060998']
1046	GO:BP	GO:0060982	coronary artery morphogenesis	1	FALSE	"The process in which the anatomical structures of coronary arteries are generated and organized. Coronary arteries are blood vessels that transport blood to the heart muscle." [GOC:mtg_heart]	9	1346	3	21118	0.00222883	0.333333	query_1	['GO:0048844', 'GO:0060977']
1047	GO:BP	GO:0071604	transforming growth factor beta production	1	FALSE	"The appearance of any member of the transforming growth factor-beta family of cytokines due to biosynthesis or secretion following a cellular stimulus, resulting in an increase in its intracellular or extracellular levels. Transforming growth factor-beta family members include TGF-B1, TGF-B2, and TGF-B3." [GOC:add, GOC:rv, PMID:16891311, PMID:2022183]	43	1346	5	21118	0.00371471	0.116279	query_1	['GO:0001816']
1048	GO:BP	GO:0060916	mesenchymal cell proliferation involved in lung development	1	FALSE	"The multiplication or reproduction of cells, resulting in the expansion of a mesenchymal cell population that contributes to the progression of the lung over time. A mesenchymal cell is a cell that normally gives rise to other cells that are organized as three-dimensional masses, rather than sheets." [GOC:dph]	4	1346	1	21118	0.000742942	0.25	query_1	['GO:0010463', 'GO:0030324']
1049	GO:BP	GO:0060920	cardiac pacemaker cell differentiation	1	FALSE	"The process in which a relatively unspecialized cell acquires specialized features of a pacemaker cell. Pacemaker cells are specialized cardiomyocytes that are responsible for regulating the timing of heart contractions." [GOC:mtg_cardiac_conduct_nov11, GOC:mtg_heart]	11	1346	4	21118	0.00297177	0.363636	query_1	['GO:0055007']
1050	GO:BP	GO:0060936	cardiac fibroblast cell development	1	FALSE	"The process whose specific outcome is the progression of a cardiac fibroblast over time, from its formation to the mature state. A cardiac fibroblast is a connective tissue cell of the heart which secretes an extracellular matrix rich in collagen and other macromolecules." [GOC:mtg_heart]	2	1346	1	21118	0.000742942	0.5	query_1	['GO:0055006', 'GO:0060935']
1051	GO:BP	GO:0060938	epicardium-derived cardiac fibroblast cell differentiation	1	FALSE	"The process in which an epicardial cell acquires the specialized structural and/or functional features of a cardiac fibroblast. A cardiac fibroblast is a connective tissue cell in the heart which secretes an extracellular matrix rich in collagen and other macromolecules." [GOC:mtg_heart]	2	1346	1	21118	0.000742942	0.5	query_1	['GO:0060935']
1052	GO:BP	GO:0060931	sinoatrial node cell development	1	FALSE	"The process whose specific outcome is the progression of a sinoatrial (SA) node cell over time, from its formation to the mature state. SA node cells are pacemaker cells that are found in the sinoatrial node." [GOC:mtg_heart]	6	1346	3	21118	0.00222883	0.5	query_1	['GO:0060921', 'GO:0060926']
1053	GO:BP	GO:0071621	granulocyte chemotaxis	1	FALSE	"The movement of a granulocyte in response to an external stimulus." [GOC:rph]	126	1346	8	21118	0.00594354	0.0634921	query_1	['GO:0030595', 'GO:0097530']
1054	GO:BP	GO:0060939	epicardium-derived cardiac fibroblast cell development	1	FALSE	"The process whose specific outcome is the progression of an epicardial-derived cardiac fibroblast over time, from its formation to the mature state. A epicardial-derived cardiac fibroblast is a connective tissue cell of the heart that arises from the epicardium and secretes an extracellular matrix rich in collagen and other macromolecules." [GOC:mtg_heart]	2	1346	1	21118	0.000742942	0.5	query_1	['GO:0060936', 'GO:0060938']
1055	GO:BP	GO:0060930	sinoatrial node cell fate commitment	1	FALSE	"The commitment of cells to sinoatrial (SA) node cell fates and their capacity to differentiate into SA node cells. SA node cells are pacemaker cells that are found in the sinoatrial node." [GOC:mtg_heart]	1	1346	1	21118	0.000742942	1	query_1	['GO:0060921', 'GO:0060927']
1056	GO:BP	GO:0060940	epithelial to mesenchymal transition involved in cardiac fibroblast development	1	FALSE	"A transition where an epicardial cell loses apical/basolateral polarity, severs intercellular adhesive junctions, degrades basement membrane components and becomes a migratory mesenchymal cell that will mature into a cardiac fibroblast." [GOC:mtg_heart]	2	1346	1	21118	0.000742942	0.5	query_1	['GO:0060317', 'GO:0060939']
1057	GO:BP	GO:0061193	taste bud development	1	FALSE	"The progression of the taste bud over time, from its formation to the mature state. The taste bud is a specialized area of the tongue that contains taste receptors." [GOC:dph]	2	1346	1	21118	0.000742942	0.5	query_1	['GO:0007423', 'GO:0043586']
1058	GO:BP	GO:0071622	regulation of granulocyte chemotaxis	1	FALSE	"Any process that modulates the rate, frequency or extent of granulocyte chemotaxis. Granulocyte chemotaxis is the movement of a granulocyte in response to an external stimulus." [GOC:mah]	55	1346	3	21118	0.00222883	0.0545455	query_1	['GO:0002688', 'GO:0071621']
1059	GO:BP	GO:0071624	positive regulation of granulocyte chemotaxis	1	FALSE	"Any process that increases the rate, frequency or extent of granulocyte chemotaxis. Granulocyte chemotaxis is the movement of a granulocyte in response to an external stimulus." [GOC:mah]	29	1346	2	21118	0.00148588	0.0689655	query_1	['GO:0002690', 'GO:0071621', 'GO:0071622']
1060	GO:BP	GO:0060929	atrioventricular node cell fate commitment	1	FALSE	"The commitment of cells to atrioventricular (AV) node cell fates and their capacity to differentiate into AV node cells." [GOC:mtg_heart]	2	1346	1	21118	0.000742942	0.5	query_1	['GO:0060922', 'GO:0060927']
1061	GO:BP	GO:0071625	vocalization behavior	1	FALSE	"The behavior in which an organism produces sounds by a mechanism involving its respiratory system." [GOC:mah]	20	1346	2	21118	0.00148588	0.1	query_1	['GO:0007610']
1062	GO:BP	GO:0060928	atrioventricular node cell development	1	FALSE	"The process whose specific outcome is the progression of an atrioventricular (AV) node cell over time, from its formation to the mature state." [GOC:mtg_heart]	4	1346	1	21118	0.000742942	0.25	query_1	['GO:0060922', 'GO:0060926']
1063	GO:BP	GO:0060927	cardiac pacemaker cell fate commitment	1	FALSE	"The commitment of cells to pacemaker cell fates and their capacity to differentiate into pacemaker cells. Pacemaker cells are specialized cardiomyocytes that are responsible for regulating the timing of heart contractions." [GOC:mtg_cardiac_conduct_nov11, GOC:mtg_heart]	3	1346	2	21118	0.00148588	0.666667	query_1	['GO:0060920', 'GO:0060923']
1064	GO:BP	GO:0060926	cardiac pacemaker cell development	1	FALSE	"The process whose specific outcome is the progression of a pacemaker cell over time, from its formation to the mature state. Pacemaker cells are specialized cardiomyocytes that are responsible for regulating the timing of heart contractions." [GOC:mtg_cardiac_conduct_nov11, GOC:mtg_heart]	10	1346	4	21118	0.00297177	0.4	query_1	['GO:0055013', 'GO:0060920']
1065	GO:BP	GO:0060923	cardiac muscle cell fate commitment	1	FALSE	"The commitment of cells to specific cardiac muscle cell fates and their capacity to differentiate into cardiac muscle cells. Cardiac muscle cells are striated muscle cells that are responsible for heart contraction." [GOC:mtg_heart]	11	1346	2	21118	0.00148588	0.181818	query_1	['GO:0042693', 'GO:0055007', 'GO:0060911']
1066	GO:BP	GO:0071616	acyl-CoA biosynthetic process	1	FALSE	"The chemical reactions and pathways resulting in the formation of acyl-CoA, any derivative of coenzyme A in which the sulfhydryl group is in thiolester linkage with an acyl group." [GOC:cjk]	33	1346	4	21118	0.00297177	0.121212	query_1	['GO:0006637', 'GO:0009152', 'GO:0034030', 'GO:0034033', 'GO:0035384', 'GO:0043604']
1067	GO:BP	GO:0071605	monocyte chemotactic protein-1 production	1	FALSE	"The appearance of monocyte chemotactic protein-1 due to biosynthesis or secretion following a cellular stimulus, resulting in an increase in its intracellular or extracellular levels." [GOC:add, GOC:rv]	19	1346	1	21118	0.000742942	0.0526316	query_1	['GO:0032602']
1068	GO:BP	GO:0071636	positive regulation of transforming growth factor beta production	1	FALSE	"Any process that activates or increases the frequency, rate, or extent of production of transforming growth factor-beta." [GOC:mah]	22	1346	4	21118	0.00297177	0.181818	query_1	['GO:0001819', 'GO:0071604', 'GO:0071634']
1069	GO:BP	GO:0060968	regulation of gene silencing	1	FALSE	"Any process that modulates the rate, frequency, or extent of gene silencing, the transcriptional or post-transcriptional process carried out at the cellular level that results in long-term gene inactivation." [GOC:dph, GOC:tb]	76	1346	10	21118	0.00742942	0.131579	query_1	['GO:0010468', 'GO:0016458', 'GO:0050794']
1070	GO:BP	GO:0071611	granulocyte colony-stimulating factor production	1	FALSE	"The appearance of granulocyte colony-stimulating factor due to biosynthesis or secretion following a cellular stimulus, resulting in an increase in its intracellular or extracellular levels." [GOC:add, GOC:rv]	4	1346	1	21118	0.000742942	0.25	query_1	['GO:0001816']
1071	GO:BP	GO:0060921	sinoatrial node cell differentiation	1	FALSE	"The process in which a relatively unspecialized cell acquires specialized features of a sinoatrial (SA) node cell. SA node cells are pacemaker cells that are found in the sinoatrial node." [GOC:mtg_heart]	7	1346	3	21118	0.00222883	0.428571	query_1	['GO:0003163', 'GO:0060920']
1072	GO:BP	GO:0060967	negative regulation of gene silencing by RNA	1	FALSE	"Any process that decreases the rate, frequency, or extent of gene silencing by RNA. Gene silencing by RNA is the process in which RNA molecules inactivate expression of target genes." [GOC:dph, GOC:tb]	20	1346	4	21118	0.00297177	0.2	query_1	['GO:0031047', 'GO:0060966', 'GO:0060969']
1073	GO:BP	GO:0060896	neural plate pattern specification	1	FALSE	"The developmental process that results in the creation of defined areas or spaces within the neural plate to which cells respond and eventually are instructed to differentiate." [GOC:dph, GOC:sdb_2009, GOC:tb]	7	1346	1	21118	0.000742942	0.142857	query_1	['GO:0007389']
1074	GO:BP	GO:0060966	regulation of gene silencing by RNA	1	FALSE	"Any process that regulates the rate, frequency, or extent of gene silencing by RNA. Gene silencing by RNA is the process in which RNA molecules inactivate expression of target genes." [GOC:dph, GOC:tb]	48	1346	9	21118	0.00668648	0.1875	query_1	['GO:0031047', 'GO:0060968']
1075	GO:BP	GO:0060964	regulation of gene silencing by miRNA	1	FALSE	"Any process that modulates the rate, frequency, or extent of the downregulation of gene expression through the action of microRNAs (miRNAs), endogenous 21-24 nucleotide small RNAs processed from stem-loop RNA precursors (pre-miRNAs). Once incorporated into a RNA-induced silencing complex (RISC), miRNAs can downregulate gene expression by either of two posttranscriptional mechanisms: RNA (often m…	44	1346	8	21118	0.00594354	0.181818	query_1	['GO:0035195', 'GO:0060147', 'GO:0060966']
1076	GO:BP	GO:0060956	endocardial cell differentiation	1	FALSE	"The process in which a relatively unspecialized cell acquires the specialized structural and/or functional features of an endocardial cell. An endocardial cell is a specialized endothelial cell that makes up the endocardium portion of the heart. The endocardium is the innermost layer of tissue of the heart, and lines the heart chambers." [GOC:mtg_heart]	6	1346	2	21118	0.00148588	0.333333	query_1	['GO:0003157', 'GO:0003348']
1077	GO:BP	GO:0060948	cardiac vascular smooth muscle cell development	1	FALSE	"The process whose specific outcome is the progression of a cardiac vascular smooth muscle cell over time, from its formation to the mature state." [GOC:mtg_heart]	5	1346	2	21118	0.00148588	0.4	query_1	['GO:0055006', 'GO:0060947', 'GO:0097084']
1078	GO:BP	GO:0071635	negative regulation of transforming growth factor beta production	1	FALSE	"Any process that stops, prevents, or reduces the frequency, rate, or extent of production of transforming growth factor-beta." [GOC:mah]	13	1346	2	21118	0.00148588	0.153846	query_1	['GO:0001818', 'GO:0071604', 'GO:0071634']
1079	GO:BP	GO:0071634	regulation of transforming growth factor beta production	1	FALSE	"Any process that modulates the frequency, rate, or extent of production of transforming growth factor-beta." [GOC:mah]	41	1346	5	21118	0.00371471	0.121951	query_1	['GO:0001817', 'GO:0071604']
1080	GO:BP	GO:0060922	atrioventricular node cell differentiation	1	FALSE	"The process in which a relatively unspecialized cell acquires specialized features of an atrioventricular (AV) node cell. AV node cells are pacemaker cells that are found in the atrioventricular node." [GOC:mtg_heart]	4	1346	1	21118	0.000742942	0.25	query_1	['GO:0003162', 'GO:0003292', 'GO:0060920']
1081	GO:BP	GO:0060965	negative regulation of gene silencing by miRNA	1	FALSE	"Any process that decreases the rate, frequency, or extent of gene silencing by miRNA." [GOC:aruk, GOC:bc, GOC:dph, GOC:rl, GOC:tb, PMID:23985560, PMID:28379604]	18	1346	3	21118	0.00222883	0.166667	query_1	['GO:0035195', 'GO:0060149', 'GO:0060964', 'GO:0060967']
1082	GO:BP	GO:0060879	semicircular canal fusion	1	FALSE	"Creation of the central hole of the semicircular canal by sealing the edges of the pouch that forms during the process of semicircular canal formation." [GOC:dph, GOC:sdb_2009, GOC:tb]	1	1346	1	21118	0.000742942	1	query_1	['GO:0060606', 'GO:0060876']
1083	GO:BP	GO:0071674	mononuclear cell migration	1	FALSE	"The movement of a mononuclear cell within or between different tissues and organs of the body." [GOC:mah]	174	1346	9	21118	0.00668648	0.0517241	query_1	['GO:0050900']
1084	GO:BP	GO:0060876	semicircular canal formation	1	FALSE	"The developmental process pertaining to the initial formation of the semicircular canal from the otic vesicle. This process begins with the regionalization of the vesicle that specifies the area where the vesicles will form and continues through the process of fusion which forms the initial tubes." [GOC:dph, GOC:sdb_2009, GOC:tb]	1	1346	1	21118	0.000742942	1	query_1	['GO:0035148', 'GO:0048752']
1085	GO:BP	GO:0071680	response to indole-3-methanol	1	FALSE	"Any process that results in a change in state or activity of a cell or an organism (in terms of movement, secretion, enzyme production, gene expression, etc.) as a result of an indole-3-methanol stimulus." [GOC:mah, GOC:yaf]	6	1346	2	21118	0.00148588	0.333333	query_1	['GO:0010243', 'GO:0014070', 'GO:0097305']
1086	GO:BP	GO:0071681	cellular response to indole-3-methanol	1	FALSE	"Any process that results in a change in state or activity of a cell (in terms of movement, secretion, enzyme production, gene expression, etc.) as a result of an indole-3-methanol stimulus." [GOC:mah, GOC:yaf]	5	1346	2	21118	0.00148588	0.4	query_1	['GO:0071407', 'GO:0071417', 'GO:0071680', 'GO:0097306']
1087	GO:BP	GO:0061033	secretion by lung epithelial cell involved in lung growth	1	FALSE	"The controlled release of liquid by a lung epithelial cell that contributes to an increase in size of the lung as part of its development." [GOC:dph]	3	1346	2	21118	0.00148588	0.666667	query_1	['GO:0032940', 'GO:0060437']
1088	GO:BP	GO:0071684	organism emergence from protective structure	1	FALSE	"The developmental process in which an organism emerges from a surrounding protective structure such as an egg or pupa case." [GOC:mah]	38	1346	4	21118	0.00297177	0.105263	query_1	['GO:0032501']
1089	GO:BP	GO:0071692	protein localization to extracellular region	1	FALSE	"Any process in which a protein is transported from one specific location in the extracellular region to another, or maintained in a specific extracellular location." [GOC:mah]	382	1346	32	21118	0.0237741	0.0837696	query_1	['GO:0008104']
1090	GO:BP	GO:0060839	endothelial cell fate commitment	1	FALSE	"The commitment of a cell to an endothelial cell fate and its capacity to differentiate into an endothelial cell." [GOC:dph, GOC:sdb_2009, GOC:tb]	7	1346	1	21118	0.000742942	0.142857	query_1	['GO:0045446', 'GO:0072148']
1091	GO:BP	GO:0060837	blood vessel endothelial cell differentiation	1	FALSE	"The process in which a relatively unspecialized cell acquires specialized features of a blood vessel endothelial cell, a thin flattened cell that lines the inside surfaces of blood vessels." [GOC:dph, GOC:sdb_2009, GOC:tb]	9	1346	2	21118	0.00148588	0.222222	query_1	['GO:0001568', 'GO:0045446']
1092	GO:BP	GO:0060836	lymphatic endothelial cell differentiation	1	FALSE	"The process in which a venous blood vessel endothelial cell acquires specialized features of a lymphatic vessel endothelial cell, a thin flattened cell that lines the inside surfaces of lymph vessels." [GOC:dph, GOC:sdb_2009, GOC:tb]	8	1346	2	21118	0.00148588	0.25	query_1	['GO:0001945', 'GO:0045446']
1093	GO:BP	GO:0060831	smoothened signaling pathway involved in dorsal/ventral neural tube patterning	1	FALSE	"The series of molecular signals generated as a consequence of activation of the transmembrane protein Smoothened contributing to the dorsal/ventral pattern of the neural tube." [GOC:dph, GOC:sdb_2009, GOC:tb]	15	1346	2	21118	0.00148588	0.133333	query_1	['GO:0007224', 'GO:0021904']
1094	GO:BP	GO:0071696	ectodermal placode development	1	FALSE	"The progression of an ectodermal placode over time from its initial formation until its mature state. An ectodermal placode is a thickening of the ectoderm that is the primordium of many structures derived from the ectoderm." [GOC:mah]	14	1346	1	21118	0.000742942	0.0714286	query_1	['GO:0048856']
1095	GO:BP	GO:0061037	negative regulation of cartilage development	1	FALSE	"Any process that decreases the rate, frequency, or extent of cartilage development, the process whose specific outcome is the progression of the cartilage over time, from its formation to the mature structure. Cartilage is a connective tissue dominated by extracellular matrix containing collagen type II and large amounts of proteoglycan, particularly chondroitin sulfate." [GOC:dph]	29	1346	7	21118	0.00520059	0.241379	query_1	['GO:0051093', 'GO:0051216', 'GO:0051241', 'GO:0061035']
1096	GO:BP	GO:0061041	regulation of wound healing	1	FALSE	"Any process that modulates the rate, frequency, or extent of the series of events that restore integrity to a damaged tissue, following an injury." [GOC:BHF, GOC:dph]	126	1346	17	21118	0.01263	0.134921	query_1	['GO:0042060', 'GO:1903034']
1097	GO:BP	GO:0060825	fibroblast growth factor receptor signaling pathway involved in neural plate anterior/posterior pattern formation	1	FALSE	"The series of molecular signals generated as a consequence of a fibroblast growth factor receptor binding to one of its physiological ligands contributing to the anterior/posterior pattern of the neural plate." [GOC:dph, GOC:sdb_2009, GOC:tb]	2	1346	1	21118	0.000742942	0.5	query_1	['GO:0008543', 'GO:0021999']
1098	GO:BP	GO:0060806	negative regulation of cell differentiation involved in embryonic placenta development	1	FALSE	"Any process that decreases the rate, frequency or extent of cell differentiation that contributes to the progression of the placenta over time, from its initial condition to its mature state." [GOC:dph, GOC:sdb_2009, GOC:tb]	1	1346	1	21118	0.000742942	1	query_1	['GO:0045596', 'GO:0060706', 'GO:0060800', 'GO:2000242']
1099	GO:BP	GO:0071697	ectodermal placode morphogenesis	1	FALSE	"The process in which the anatomical structures of an ectodermal placode are generated and organized. An ectodermal placode is a thickening of the ectoderm that is the primordium of many structures derived from the ectoderm." [GOC:mah]	13	1346	1	21118	0.000742942	0.0769231	query_1	['GO:0009653', 'GO:0071696']
1100	GO:BP	GO:0071542	dopaminergic neuron differentiation	1	FALSE	"The process in which a neuroblast acquires the specialized structural and functional features of a dopaminergic neuron, a neuron that secretes dopamine." [GOC:rph]	35	1346	7	21118	0.00520059	0.2	query_1	['GO:0030182']
1101	GO:BP	GO:0071702	organic substance transport	1	FALSE	"The directed movement of organic substances into, out of or within a cell, or between cells, or within a multicellular organism by means of some agent such as a transporter or pore. An organic substance is a molecular entity that contains carbon." [GOC:mah]	2416	1346	185	21118	0.137444	0.0765728	query_1	['GO:0006810']
1102	GO:BP	GO:0071526	semaphorin-plexin signaling pathway	1	FALSE	"A series of molecular signals generated as a consequence of a semaphorin receptor (composed of a plexin and a neurophilin) binding to a semaphorin ligand." [GOC:BHF, GOC:mah, GOC:vk, PMID:15239959]	38	1346	4	21118	0.00297177	0.105263	query_1	['GO:0007166']
1103	GO:BP	GO:0071529	cementum mineralization	1	FALSE	"The process in which calcium salts, mainly carbonated hydroxyapatite, are deposited into the initial acellular cementum." [GOC:sl, PMID:17043865]	1	1346	1	21118	0.000742942	1	query_1	['GO:0034505']
1104	GO:BP	GO:0061046	regulation of branching involved in lung morphogenesis	1	FALSE	"Any process that modulates the rate, frequency, or extent of the process in which a highly ordered sequence of patterning events generates the branched structures of the lung, consisting of reiterated combinations of bud outgrowth, elongation, and dichotomous subdivision of terminal units." [GOC:dph, GOC:yaf]	7	1346	4	21118	0.00297177	0.571429	query_1	['GO:0060441', 'GO:0060688', 'GO:1905330']
1105	GO:BP	GO:0060800	regulation of cell differentiation involved in embryonic placenta development	1	FALSE	"Any process that modulates the rate, frequency or extent of cell differentiation that contributes to the progression of the placenta over time, from its initial condition to its mature state." [GOC:dph, GOC:sdb_2009, GOC:tb]	4	1346	1	21118	0.000742942	0.25	query_1	['GO:0045595', 'GO:0060706', 'GO:2000241']
1106	GO:BP	GO:0071711	basement membrane organization	1	FALSE	"A process that is carried out at the cellular level which results in the assembly, arrangement of constituent parts, or disassembly of the basement membrane." [GOC:mah]	27	1346	2	21118	0.00148588	0.0740741	query_1	['GO:0030198']
1107	GO:BP	GO:0061045	negative regulation of wound healing	1	FALSE	"Any process that decreases the rate, frequency, or extent of the series of events that restore integrity to a damaged tissue, following an injury." [GOC:dph]	68	1346	11	21118	0.00817236	0.161765	query_1	['GO:0032102', 'GO:0042060', 'GO:0061041', 'GO:1903035']
1108	GO:BP	GO:0060841	venous blood vessel development	1	FALSE	"The progression of the venous blood vessel over time from its initial formation to the mature structure. Venous blood vessels carry blood back to the heart after the capillary bed." [GOC:dph, GOC:sdb_2009, GOC:tb]	19	1346	3	21118	0.00222883	0.157895	query_1	['GO:0001568']
1109	GO:BP	GO:0071709	membrane assembly	1	FALSE	"The aggregation, arrangement and bonding together of a set of components to form a membrane." [GOC:mah]	45	1346	5	21118	0.00371471	0.111111	query_1	['GO:0022607', 'GO:0044091', 'GO:0061024']
1110	GO:BP	GO:0071707	immunoglobulin heavy chain V-D-J recombination	1	FALSE	"The process in which immunoglobulin heavy chain V, D, and J gene segments are recombined within a single locus utilizing the conserved heptamer and nonomer recombination signal sequences (RSS)." [GOC:add, ISBN:0781735149]	3	1346	1	21118	0.000742942	0.333333	query_1	['GO:0033152']
1111	GO:BP	GO:0071539	protein localization to centrosome	1	FALSE	"A process in which a protein is transported to, or maintained at, the centrosome." [GOC:ecd]	35	1346	2	21118	0.00148588	0.0571429	query_1	['GO:1905508']
1112	GO:BP	GO:0071706	tumor necrosis factor superfamily cytokine production	1	FALSE	"The appearance of any member of the TNF superfamily due to biosynthesis or secretion following a cellular stimulus, resulting in an increase in its intracellular or extracellular levels." [GOC:add]	175	1346	18	21118	0.013373	0.102857	query_1	['GO:0001816']
1113	GO:BP	GO:0061042	vascular wound healing	1	FALSE	"Blood vessel formation when new vessels emerge from the proliferation of pre-existing blood vessels and contribute to the series of events that restore integrity to damaged vasculature." [GOC:BHF, GOC:dph]	17	1346	2	21118	0.00148588	0.117647	query_1	['GO:0060055']
[truncated: 7,826 more rows]

## Sheet: ap
	source	native	name	p_value	significant	description	term_size	query_size	intersection_size	effective_domain_size	precision	recall	query	parents
[truncated: 4,296 more rows]

## Sheet: ret
	source	native	name	p_value	significant	description	term_size	query_size	intersection_size	effective_domain_size	precision	recall	query	parents
[truncated: 6,491 more rows]

## Sheet: coch
	source	native	name	p_value	significant	description	term_size	query_size	intersection_size	effective_domain_size	precision	recall	query	parents
[truncated: 5,848 more rows]

[truncated: 1 more sheets: ebf]
