# Supplementary material for: Role of distinct fibroblast lineages and immune cells in dermal repair following UV radiation-induced tissue damage
Source: eLife journal article supplement (doi:10.7554/elife.71052), 2021-12-23
Supplement: supp [file Figure S2F - GO enrichment analysis human eye lid fibroblasts.xlsx]

## Sheet: Summary
				Summary of selected GO terms (p-value log10) from human eye lid dermis
				FB1	FB2	FB3
			connective tissue development	1.29	3.88	0
			extracellular matrix organization	9.62	12.63	0
			cellular biosynthetic process	0	0	5.69
			cellular response to cytokine stimulus	0	0	1.54
			regulation of apoptotic process	0	0	2.28
			response to oxidative stress	0	0	0
			response to stress	0.73	0	0
			DNA repair	0	0	0
			DNA damage response	0	0	0
			cellular response to UV	0	0	0
			response to UV	0	0	0

## Sheet: eyelid enrichment
	source	native	name	p_value	significant	description	term_size	query_size	intersection_size	effective_domain_size	precision	recall	query	parents	intersections
0	GO:BP	GO:0006614	SRP-dependent cotranslational protein targeting to membrane	2.15669e-51	TRUE	"The targeting of proteins to a membrane that occurs during translation and is dependent upon two key components, the signal-recognition particle (SRP) and the SRP receptor. SRP is a cytosolic particle that transiently binds to the endoplasmic reticulum (ER) signal sequence in a nascent protein, to the large ribosomal unit, and to the SRP receptor in the ER membrane." [ISBN:0716731363]	96	155	38	18123	0.245161	0.395833	FB3	['GO:0006613', 'GO:0045047']	['RPL10', 'RPL10A', 'RPL12', 'RPL13', 'RPL15', 'RPL17', 'RPL18', 'RPL21', 'RPL23A', 'RPL24', 'RPL26', 'RPL3', 'RPL32', 'RPL34', 'RPL36A', 'RPL4', 'RPL41', 'RPL5', 'RPL6', 'RPL7', 'RPL7A', 'RPL8', 'RPL9', 'RPLP0', 'RPS10', 'RPS18', 'RPS19', 'RPS2', 'RPS27A', 'RPS28', 'RPS3', 'RPS3A', 'RPS4X', 'RPS5', 'RPS6', 'RPS8', 'RPS9', 'RPSA']
1	GO:BP	GO:0006613	cotranslational protein targeting to membrane	3.7288e-50	TRUE	"The targeting of proteins to a membrane that occurs during translation. The transport of most secretory proteins, particularly those with more than 100 amino acids, into the endoplasmic reticulum lumen occurs in this manner, as does the import of some proteins into mitochondria." [ISBN:0716731363, PMID:10512867, PMID:16896215]	102	155	38	18123	0.245161	0.372549	FB3	['GO:0006612']	['RPL10', 'RPL10A', 'RPL12', 'RPL13', 'RPL15', 'RPL17', 'RPL18', 'RPL21', 'RPL23A', 'RPL24', 'RPL26', 'RPL3', 'RPL32', 'RPL34', 'RPL36A', 'RPL4', 'RPL41', 'RPL5', 'RPL6', 'RPL7', 'RPL7A', 'RPL8', 'RPL9', 'RPLP0', 'RPS10', 'RPS18', 'RPS19', 'RPS2', 'RPS27A', 'RPS28', 'RPS3', 'RPS3A', 'RPS4X', 'RPS5', 'RPS6', 'RPS8', 'RPS9', 'RPSA']
2	GO:BP	GO:0045047	protein targeting to ER	1.83308e-48	TRUE	"The process of directing proteins towards the endoplasmic reticulum (ER) using signals contained within the protein. One common mechanism uses a 16- to 30-residue signal sequence, typically located at the N-terminus of the protein and containing positively charged amino acids followed by a continuous stretch of hydrophobic residues, which directs the ribosome to the ER membrane and initiates tra…	111	155	38	18123	0.245161	0.342342	FB3	['GO:0006605', 'GO:0072599']	['RPL10', 'RPL10A', 'RPL12', 'RPL13', 'RPL15', 'RPL17', 'RPL18', 'RPL21', 'RPL23A', 'RPL24', 'RPL26', 'RPL3', 'RPL32', 'RPL34', 'RPL36A', 'RPL4', 'RPL41', 'RPL5', 'RPL6', 'RPL7', 'RPL7A', 'RPL8', 'RPL9', 'RPLP0', 'RPS10', 'RPS18', 'RPS19', 'RPS2', 'RPS27A', 'RPS28', 'RPS3', 'RPS3A', 'RPS4X', 'RPS5', 'RPS6', 'RPS8', 'RPS9', 'RPSA']
3	GO:BP	GO:0002181	cytoplasmic translation	4.48749e-48	TRUE	"The chemical reactions and pathways resulting in the formation of a protein in the cytoplasm. This is a ribosome-mediated process in which the information in messenger RNA (mRNA) is used to specify the sequence of amino acids in the protein." [GOC:hjd]	149	155	41	18123	0.264516	0.275168	FB3	['GO:0006412']	['EEF2', 'EIF3L', 'EIF4A2', 'RPL10', 'RPL10A', 'RPL12', 'RPL13', 'RPL15', 'RPL17', 'RPL18', 'RPL21', 'RPL23A', 'RPL24', 'RPL26', 'RPL3', 'RPL32', 'RPL34', 'RPL36A', 'RPL4', 'RPL41', 'RPL5', 'RPL6', 'RPL7', 'RPL7A', 'RPL8', 'RPL9', 'RPLP0', 'RPS10', 'RPS18', 'RPS19', 'RPS2', 'RPS27A', 'RPS28', 'RPS3', 'RPS3A', 'RPS4X', 'RPS5', 'RPS6', 'RPS8', 'RPS9', 'RPSA']
4	GO:BP	GO:0072599	establishment of protein localization to endoplasmic reticulum	9.12973e-48	TRUE	"The directed movement of a protein to a specific location in the endoplasmic reticulum." [GOC:mah]	115	155	38	18123	0.245161	0.330435	FB3	['GO:0070972', 'GO:0072594']	['RPL10', 'RPL10A', 'RPL12', 'RPL13', 'RPL15', 'RPL17', 'RPL18', 'RPL21', 'RPL23A', 'RPL24', 'RPL26', 'RPL3', 'RPL32', 'RPL34', 'RPL36A', 'RPL4', 'RPL41', 'RPL5', 'RPL6', 'RPL7', 'RPL7A', 'RPL8', 'RPL9', 'RPLP0', 'RPS10', 'RPS18', 'RPS19', 'RPS2', 'RPS27A', 'RPS28', 'RPS3', 'RPS3A', 'RPS4X', 'RPS5', 'RPS6', 'RPS8', 'RPS9', 'RPSA']
5	GO:BP	GO:0000184	nuclear-transcribed mRNA catabolic process, nonsense-mediated decay	1.85702e-46	TRUE	"The nonsense-mediated decay pathway for nuclear-transcribed mRNAs degrades mRNAs in which an amino-acid codon has changed to a nonsense codon; this prevents the translation of such mRNAs into truncated, and potentially harmful, proteins." [GOC:krc, GOC:ma, PMID:10025395]	123	155	38	18123	0.245161	0.308943	FB3	['GO:0000956']	['RPL10', 'RPL10A', 'RPL12', 'RPL13', 'RPL15', 'RPL17', 'RPL18', 'RPL21', 'RPL23A', 'RPL24', 'RPL26', 'RPL3', 'RPL32', 'RPL34', 'RPL36A', 'RPL4', 'RPL41', 'RPL5', 'RPL6', 'RPL7', 'RPL7A', 'RPL8', 'RPL9', 'RPLP0', 'RPS10', 'RPS18', 'RPS19', 'RPS2', 'RPS27A', 'RPS28', 'RPS3', 'RPS3A', 'RPS4X', 'RPS5', 'RPS6', 'RPS8', 'RPS9', 'RPSA']
6	GO:BP	GO:0006413	translational initiation	1.45488e-43	TRUE	"The process preceding formation of the peptide bond between the first two amino acids of a protein. This includes the formation of a complex of the ribosome, mRNA or circRNA, and an initiation complex that contains the first aminoacyl-tRNA." [ISBN:019879276X]	203	155	42	18123	0.270968	0.206897	FB3	['GO:0006412', 'GO:0044237']	['ATF3', 'EIF3L', 'EIF4A2', 'NPM1', 'RPL10', 'RPL10A', 'RPL12', 'RPL13', 'RPL15', 'RPL17', 'RPL18', 'RPL21', 'RPL23A', 'RPL24', 'RPL26', 'RPL3', 'RPL32', 'RPL34', 'RPL36A', 'RPL4', 'RPL41', 'RPL5', 'RPL6', 'RPL7', 'RPL7A', 'RPL8', 'RPL9', 'RPLP0', 'RPS10', 'RPS18', 'RPS19', 'RPS2', 'RPS27A', 'RPS28', 'RPS3', 'RPS3A', 'RPS4X', 'RPS5', 'RPS6', 'RPS8', 'RPS9', 'RPSA']
7	GO:BP	GO:0070972	protein localization to endoplasmic reticulum	1.82497e-43	TRUE	"A process in which a protein is transported to, or maintained in, a location within the endoplasmic reticulum." [GOC:mah]	144	155	38	18123	0.245161	0.263889	FB3	['GO:0033365']	['RPL10', 'RPL10A', 'RPL12', 'RPL13', 'RPL15', 'RPL17', 'RPL18', 'RPL21', 'RPL23A', 'RPL24', 'RPL26', 'RPL3', 'RPL32', 'RPL34', 'RPL36A', 'RPL4', 'RPL41', 'RPL5', 'RPL6', 'RPL7', 'RPL7A', 'RPL8', 'RPL9', 'RPLP0', 'RPS10', 'RPS18', 'RPS19', 'RPS2', 'RPS27A', 'RPS28', 'RPS3', 'RPS3A', 'RPS4X', 'RPS5', 'RPS6', 'RPS8', 'RPS9', 'RPSA']
8	GO:BP	GO:0019083	viral transcription	1.55905e-42	TRUE	"The process by which a viral genome, or part of a viral genome, is transcribed within the host cell." [GOC:jl, ISBN:0781702534]	181	155	40	18123	0.258065	0.220994	FB3	['GO:0016032', 'GO:0019080']	['JUN', 'RPL10', 'RPL10A', 'RPL12', 'RPL13', 'RPL15', 'RPL17', 'RPL18', 'RPL21', 'RPL23A', 'RPL24', 'RPL26', 'RPL3', 'RPL32', 'RPL34', 'RPL36A', 'RPL4', 'RPL41', 'RPL5', 'RPL6', 'RPL7', 'RPL7A', 'RPL8', 'RPL9', 'RPLP0', 'RPS10', 'RPS18', 'RPS19', 'RPS2', 'RPS27A', 'RPS28', 'RPS3', 'RPS3A', 'RPS4X', 'RPS5', 'RPS6', 'RPS8', 'RPS9', 'RPSA', 'ZFP36']
9	GO:BP	GO:0000956	nuclear-transcribed mRNA catabolic process	2.2219e-39	TRUE	"The chemical reactions and pathways resulting in the breakdown of nuclear-transcribed mRNAs in eukaryotic cells." [GOC:krc]	214	155	40	18123	0.258065	0.186916	FB3	['GO:0006402']	['BTG2', 'RPL10', 'RPL10A', 'RPL12', 'RPL13', 'RPL15', 'RPL17', 'RPL18', 'RPL21', 'RPL23A', 'RPL24', 'RPL26', 'RPL3', 'RPL32', 'RPL34', 'RPL36A', 'RPL4', 'RPL41', 'RPL5', 'RPL6', 'RPL7', 'RPL7A', 'RPL8', 'RPL9', 'RPLP0', 'RPS10', 'RPS18', 'RPS19', 'RPS2', 'RPS27A', 'RPS28', 'RPS3', 'RPS3A', 'RPS4X', 'RPS5', 'RPS6', 'RPS8', 'RPS9', 'RPSA', 'ZFP36']
10	GO:BP	GO:0019080	viral gene expression	5.29478e-39	TRUE	"A process by which a viral gene is converted into a mature gene product or products (proteins or RNA). This includes viral transcription, processing to produce a mature RNA product, and viral translation." [GOC:bf, GOC:jl, ISBN:0121585336]	237	155	41	18123	0.264516	0.172996	FB3	['GO:0016032']	['EIF3L', 'JUN', 'RPL10', 'RPL10A', 'RPL12', 'RPL13', 'RPL15', 'RPL17', 'RPL18', 'RPL21', 'RPL23A', 'RPL24', 'RPL26', 'RPL3', 'RPL32', 'RPL34', 'RPL36A', 'RPL4', 'RPL41', 'RPL5', 'RPL6', 'RPL7', 'RPL7A', 'RPL8', 'RPL9', 'RPLP0', 'RPS10', 'RPS18', 'RPS19', 'RPS2', 'RPS27A', 'RPS28', 'RPS3', 'RPS3A', 'RPS4X', 'RPS5', 'RPS6', 'RPS8', 'RPS9', 'RPSA', 'ZFP36']
11	GO:BP	GO:0006612	protein targeting to membrane	2.03482e-37	TRUE	"The process of directing proteins towards a membrane, usually using signals contained within the protein." [GOC:curators]	219	155	39	18123	0.251613	0.178082	FB3	['GO:0006605', 'GO:0090150']	['NACA', 'RPL10', 'RPL10A', 'RPL12', 'RPL13', 'RPL15', 'RPL17', 'RPL18', 'RPL21', 'RPL23A', 'RPL24', 'RPL26', 'RPL3', 'RPL32', 'RPL34', 'RPL36A', 'RPL4', 'RPL41', 'RPL5', 'RPL6', 'RPL7', 'RPL7A', 'RPL8', 'RPL9', 'RPLP0', 'RPS10', 'RPS18', 'RPS19', 'RPS2', 'RPS27A', 'RPS28', 'RPS3', 'RPS3A', 'RPS4X', 'RPS5', 'RPS6', 'RPS8', 'RPS9', 'RPSA']
12	GO:BP	GO:0006402	mRNA catabolic process	2.90207e-31	TRUE	"The chemical reactions and pathways resulting in the breakdown of mRNA, messenger RNA, which is responsible for carrying the coded genetic 'message', transcribed from DNA, to sites of protein assembly at the ribosomes." [ISBN:0198506732]	388	155	42	18123	0.270968	0.108247	FB3	['GO:0006401', 'GO:0010629', 'GO:0016071']	['BTG2', 'CIRBP', 'NPM1', 'RPL10', 'RPL10A', 'RPL12', 'RPL13', 'RPL15', 'RPL17', 'RPL18', 'RPL21', 'RPL23A', 'RPL24', 'RPL26', 'RPL3', 'RPL32', 'RPL34', 'RPL36A', 'RPL4', 'RPL41', 'RPL5', 'RPL6', 'RPL7', 'RPL7A', 'RPL8', 'RPL9', 'RPLP0', 'RPS10', 'RPS18', 'RPS19', 'RPS2', 'RPS27A', 'RPS28', 'RPS3', 'RPS3A', 'RPS4X', 'RPS5', 'RPS6', 'RPS8', 'RPS9', 'RPSA', 'ZFP36']
13	GO:BP	GO:0006401	RNA catabolic process	2.32549e-29	TRUE	"The chemical reactions and pathways resulting in the breakdown of RNA, ribonucleic acid, one of the two main type of nucleic acid, consisting of a long, unbranched macromolecule formed from ribonucleotides joined in 3',5'-phosphodiester linkage." [ISBN:0198506732]	431	155	42	18123	0.270968	0.0974478	FB3	['GO:0016070', 'GO:0034655', 'GO:0044265']	['BTG2', 'CIRBP', 'NPM1', 'RPL10', 'RPL10A', 'RPL12', 'RPL13', 'RPL15', 'RPL17', 'RPL18', 'RPL21', 'RPL23A', 'RPL24', 'RPL26', 'RPL3', 'RPL32', 'RPL34', 'RPL36A', 'RPL4', 'RPL41', 'RPL5', 'RPL6', 'RPL7', 'RPL7A', 'RPL8', 'RPL9', 'RPLP0', 'RPS10', 'RPS18', 'RPS19', 'RPS2', 'RPS27A', 'RPS28', 'RPS3', 'RPS3A', 'RPS4X', 'RPS5', 'RPS6', 'RPS8', 'RPS9', 'RPSA', 'ZFP36']
14	GO:BP	GO:0090150	establishment of protein localization to membrane	7.23031e-29	TRUE	"The directed movement of a protein to a specific location in a membrane." [GOC:ascb_2009, GOC:dph, GOC:tb]	385	155	40	18123	0.258065	0.103896	FB3	['GO:0045184', 'GO:0072657']	['NACA', 'RAPSN', 'RPL10', 'RPL10A', 'RPL12', 'RPL13', 'RPL15', 'RPL17', 'RPL18', 'RPL21', 'RPL23A', 'RPL24', 'RPL26', 'RPL3', 'RPL32', 'RPL34', 'RPL36A', 'RPL4', 'RPL41', 'RPL5', 'RPL6', 'RPL7', 'RPL7A', 'RPL8', 'RPL9', 'RPLP0', 'RPS10', 'RPS18', 'RPS19', 'RPS2', 'RPS27A', 'RPS28', 'RPS3', 'RPS3A', 'RPS4X', 'RPS5', 'RPS6', 'RPS8', 'RPS9', 'RPSA']
15	GO:BP	GO:0006605	protein targeting	3.29038e-28	TRUE	"The process of targeting specific proteins to particular regions of the cell, typically membrane-bounded subcellular organelles. Usually requires an organelle specific protein sequence motif." [GOC:ma]	400	155	40	18123	0.258065	0.1	FB3	['GO:0006886']	['NACA', 'RPL10', 'RPL10A', 'RPL12', 'RPL13', 'RPL15', 'RPL17', 'RPL18', 'RPL21', 'RPL23A', 'RPL24', 'RPL26', 'RPL3', 'RPL32', 'RPL34', 'RPL36A', 'RPL4', 'RPL41', 'RPL5', 'RPL6', 'RPL7', 'RPL7A', 'RPL8', 'RPL9', 'RPLP0', 'RPS10', 'RPS18', 'RPS19', 'RPS2', 'RPS27A', 'RPS28', 'RPS3', 'RPS3A', 'RPS4X', 'RPS5', 'RPS6', 'RPS8', 'RPS9', 'RPSA', 'SLC25A6']
16	GO:BP	GO:0042254	ribosome biogenesis	2.15038e-27	TRUE	"A cellular process that results in the biosynthesis of constituent macromolecules, assembly, and arrangement of constituent parts of ribosome subunits; includes transport to the sites of protein synthesis." [GOC:ma, PMID:26404467, Wikipedia:Ribosome_biogenesis]	335	155	37	18123	0.23871	0.110448	FB3	['GO:0022613']	['FBL', 'NPM1', 'RPL10', 'RPL10A', 'RPL12', 'RPL13', 'RPL15', 'RPL17', 'RPL18', 'RPL21', 'RPL23A', 'RPL24', 'RPL26', 'RPL3', 'RPL32', 'RPL34', 'RPL36A', 'RPL4', 'RPL41', 'RPL5', 'RPL6', 'RPL7', 'RPL7A', 'RPL8', 'RPL9', 'RPLP0', 'RPS10', 'RPS19', 'RPS2', 'RPS28', 'RPS5', 'RPS6', 'RPS8', 'RPS9', 'RPSA', 'RSL1D1', 'RSL24D1']
17	GO:BP	GO:0006412	translation	1.82427e-26	TRUE	"The cellular metabolic process in which a protein is formed, using the sequence of a mature mRNA or circRNA molecule to specify the sequence of amino acids in a polypeptide chain. Translation is mediated by the ribosome, and begins with the formation of a ternary complex between aminoacylated initiator methionine tRNA, GTP, and initiation factor 2, which subsequently associates with the small su…	804	155	50	18123	0.322581	0.0621891	FB3	['GO:0010467', 'GO:0034645', 'GO:0043043', 'GO:0044267']	['ATF3', 'BTG2', 'CIRBP', 'EEF2', 'EIF3L', 'EIF4A2', 'GAPDH', 'MYC', 'NACA', 'NPM1', 'RPL10', 'RPL10A', 'RPL12', 'RPL13', 'RPL15', 'RPL17', 'RPL18', 'RPL21', 'RPL23A', 'RPL24', 'RPL26', 'RPL3', 'RPL32', 'RPL34', 'RPL36A', 'RPL4', 'RPL41', 'RPL5', 'RPL6', 'RPL7', 'RPL7A', 'RPL8', 'RPL9', 'RPLP0', 'RPS10', 'RPS18', 'RPS19', 'RPS2', 'RPS27A', 'RPS28', 'RPS3', 'RPS3A', 'RPS4X', 'RPS5', 'RPS6', 'RPS8'…
18	GO:BP	GO:0043043	peptide biosynthetic process	1.00898e-25	TRUE	"The chemical reactions and pathways resulting in the formation of peptides, compounds of 2 or more (but usually less than 100) amino acids where the alpha carboxyl group of one is bound to the alpha amino group of another. This may include the translation of a precursor protein and its subsequent processing into a functional peptide." [GOC:dph, GOC:jl]	834	155	50	18123	0.322581	0.059952	FB3	['GO:0006518', 'GO:0043604', 'GO:1901566']	['ATF3', 'BTG2', 'CIRBP', 'EEF2', 'EIF3L', 'EIF4A2', 'GAPDH', 'MYC', 'NACA', 'NPM1', 'RPL10', 'RPL10A', 'RPL12', 'RPL13', 'RPL15', 'RPL17', 'RPL18', 'RPL21', 'RPL23A', 'RPL24', 'RPL26', 'RPL3', 'RPL32', 'RPL34', 'RPL36A', 'RPL4', 'RPL41', 'RPL5', 'RPL6', 'RPL7', 'RPL7A', 'RPL8', 'RPL9', 'RPLP0', 'RPS10', 'RPS18', 'RPS19', 'RPS2', 'RPS27A', 'RPS28', 'RPS3', 'RPS3A', 'RPS4X', 'RPS5', 'RPS6', 'RPS8'…
19	GO:BP	GO:0006518	peptide metabolic process	5.24111e-25	TRUE	"The chemical reactions and pathways involving peptides, compounds of two or more amino acids where the alpha carboxyl group of one is bound to the alpha amino group of another." [GOC:go_curators]	998	155	53	18123	0.341935	0.0531062	FB3	['GO:0043603', 'GO:1901564']	['APOE', 'ATF3', 'BTG2', 'CIRBP', 'EEF2', 'EIF3L', 'EIF4A2', 'GAPDH', 'MIR24-2', 'MYC', 'NACA', 'NPM1', 'RPL10', 'RPL10A', 'RPL12', 'RPL13', 'RPL15', 'RPL17', 'RPL18', 'RPL21', 'RPL23A', 'RPL24', 'RPL26', 'RPL3', 'RPL32', 'RPL34', 'RPL36A', 'RPL4', 'RPL41', 'RPL5', 'RPL6', 'RPL7', 'RPL7A', 'RPL8', 'RPL9', 'RPLP0', 'RPS10', 'RPS18', 'RPS19', 'RPS2', 'RPS27A', 'RPS28', 'RPS3', 'RPS3A', 'RPS4X', 'RP…
20	GO:BP	GO:0072594	establishment of protein localization to organelle	8.60548e-25	TRUE	"The directed movement of a protein to a specific location on or in an organelle. Encompasses establishment of localization in the membrane or lumen of a membrane-bounded organelle." [GOC:mah]	523	155	41	18123	0.264516	0.0783939	FB3	['GO:0033365', 'GO:0045184']	['BMP4', 'HSP90AB1', 'RPL10', 'RPL10A', 'RPL12', 'RPL13', 'RPL15', 'RPL17', 'RPL18', 'RPL21', 'RPL23A', 'RPL24', 'RPL26', 'RPL3', 'RPL32', 'RPL34', 'RPL36A', 'RPL4', 'RPL41', 'RPL5', 'RPL6', 'RPL7', 'RPL7A', 'RPL8', 'RPL9', 'RPLP0', 'RPS10', 'RPS18', 'RPS19', 'RPS2', 'RPS27A', 'RPS28', 'RPS3', 'RPS3A', 'RPS4X', 'RPS5', 'RPS6', 'RPS8', 'RPS9', 'RPSA', 'SLC25A6']
21	GO:BP	GO:0016032	viral process	9.82427e-25	TRUE	"A multi-organism process in which a virus is a participant. The other participant is the host. Includes infection of a host cell, replication of the viral genome, and assembly of progeny virus particles. In some cases the viral genetic material may integrate into the host genome and only subsequently, under particular circumstances, 'complete' its life cycle." [GOC:bf, GOC:jl, GOC:mah]	1011	155	53	18123	0.341935	0.0524233	FB3	['GO:0008150']	['APOE', 'BST2', 'CCL2', 'CXCR4', 'DAG1', 'EIF3L', 'EIF4A2', 'HLA-E', 'HSP90AB1', 'IL32', 'JUN', 'MYC', 'NPM1', 'RPL10', 'RPL10A', 'RPL12', 'RPL13', 'RPL15', 'RPL17', 'RPL18', 'RPL21', 'RPL23A', 'RPL24', 'RPL26', 'RPL3', 'RPL32', 'RPL34', 'RPL36A', 'RPL4', 'RPL41', 'RPL5', 'RPL6', 'RPL7', 'RPL7A', 'RPL8', 'RPL9', 'RPLP0', 'RPS10', 'RPS18', 'RPS19', 'RPS2', 'RPS27A', 'RPS28', 'RPS3', 'RPS3A', 'RPS…
22	GO:BP	GO:0043604	amide biosynthetic process	1.60602e-24	TRUE	"The chemical reactions and pathways resulting in the formation of an amide, any derivative of an oxoacid in which an acidic hydroxy group has been replaced by an amino or substituted amino group." [GOC:curators]	975	155	52	18123	0.335484	0.0533333	FB3	['GO:0043603', 'GO:0044271']	['ATF3', 'BTG2', 'CIRBP', 'EEF2', 'EIF3L', 'EIF4A2', 'GAPDH', 'MYC', 'NACA', 'NPM1', 'PDK4', 'RPL10', 'RPL10A', 'RPL12', 'RPL13', 'RPL15', 'RPL17', 'RPL18', 'RPL21', 'RPL23A', 'RPL24', 'RPL26', 'RPL3', 'RPL32', 'RPL34', 'RPL36A', 'RPL4', 'RPL41', 'RPL5', 'RPL6', 'RPL7', 'RPL7A', 'RPL8', 'RPL9', 'RPLP0', 'RPS10', 'RPS18', 'RPS19', 'RPS2', 'RPS27A', 'RPS28', 'RPS3', 'RPS3A', 'RPS4X', 'RPS5', 'RPS6'…
23	GO:BP	GO:0006364	rRNA processing	1.77365e-24	TRUE	"Any process involved in the conversion of a primary ribosomal RNA (rRNA) transcript into one or more mature rRNA molecules." [GOC:curators]	265	155	32	18123	0.206452	0.120755	FB3	['GO:0016072', 'GO:0034470', 'GO:0042254']	['FBL', 'RPL10', 'RPL10A', 'RPL12', 'RPL13', 'RPL15', 'RPL17', 'RPL18', 'RPL21', 'RPL23A', 'RPL24', 'RPL26', 'RPL3', 'RPL32', 'RPL34', 'RPL36A', 'RPL4', 'RPL41', 'RPL5', 'RPL6', 'RPL7', 'RPL7A', 'RPL8', 'RPL9', 'RPLP0', 'RPS19', 'RPS2', 'RPS28', 'RPS6', 'RPS8', 'RPS9', 'RSL1D1']
24	GO:BP	GO:0034655	nucleobase-containing compound catabolic process	2.5252e-24	TRUE	"The chemical reactions and pathways resulting in the breakdown of nucleobases, nucleosides, nucleotides and nucleic acids." [GOC:mah]	573	155	42	18123	0.270968	0.0732984	FB3	['GO:0006139', 'GO:0019439', 'GO:0044270', 'GO:0046700', 'GO:1901361']	['BTG2', 'CIRBP', 'NPM1', 'RPL10', 'RPL10A', 'RPL12', 'RPL13', 'RPL15', 'RPL17', 'RPL18', 'RPL21', 'RPL23A', 'RPL24', 'RPL26', 'RPL3', 'RPL32', 'RPL34', 'RPL36A', 'RPL4', 'RPL41', 'RPL5', 'RPL6', 'RPL7', 'RPL7A', 'RPL8', 'RPL9', 'RPLP0', 'RPS10', 'RPS18', 'RPS19', 'RPS2', 'RPS27A', 'RPS28', 'RPS3', 'RPS3A', 'RPS4X', 'RPS5', 'RPS6', 'RPS8', 'RPS9', 'RPSA', 'ZFP36']
25	GO:BP	GO:0022613	ribonucleoprotein complex biogenesis	3.25385e-24	TRUE	"A cellular process that results in the biosynthesis of constituent macromolecules, assembly, and arrangement of constituent parts of a complex containing RNA and proteins. Includes the biosynthesis of the constituent RNA and protein molecules, and those macromolecular modifications that are involved in synthesis or assembly of the ribonucleoprotein complex." [GOC:isa_complete, GOC:mah]	473	155	39	18123	0.251613	0.0824524	FB3	['GO:0044085']	['EIF3L', 'FBL', 'HSP90AB1', 'NPM1', 'RPL10', 'RPL10A', 'RPL12', 'RPL13', 'RPL15', 'RPL17', 'RPL18', 'RPL21', 'RPL23A', 'RPL24', 'RPL26', 'RPL3', 'RPL32', 'RPL34', 'RPL36A', 'RPL4', 'RPL41', 'RPL5', 'RPL6', 'RPL7', 'RPL7A', 'RPL8', 'RPL9', 'RPLP0', 'RPS10', 'RPS19', 'RPS2', 'RPS28', 'RPS5', 'RPS6', 'RPS8', 'RPS9', 'RPSA', 'RSL1D1', 'RSL24D1']
26	GO:BP	GO:0016072	rRNA metabolic process	5.84349e-24	TRUE	"The chemical reactions and pathways involving rRNA, ribosomal RNA, a structural constituent of ribosomes." [ISBN:0198506732]	275	155	32	18123	0.206452	0.116364	FB3	['GO:0034660']	['FBL', 'RPL10', 'RPL10A', 'RPL12', 'RPL13', 'RPL15', 'RPL17', 'RPL18', 'RPL21', 'RPL23A', 'RPL24', 'RPL26', 'RPL3', 'RPL32', 'RPL34', 'RPL36A', 'RPL4', 'RPL41', 'RPL5', 'RPL6', 'RPL7', 'RPL7A', 'RPL8', 'RPL9', 'RPLP0', 'RPS19', 'RPS2', 'RPS28', 'RPS6', 'RPS8', 'RPS9', 'RSL1D1']
27	GO:BP	GO:0019439	aromatic compound catabolic process	1.42043e-23	TRUE	"The chemical reactions and pathways resulting in the breakdown of aromatic compounds, any substance containing an aromatic carbon ring." [GOC:ai]	636	155	43	18123	0.277419	0.0676101	FB3	['GO:0006725', 'GO:0044248']	['BTG2', 'CIRBP', 'NPM1', 'PON2', 'RPL10', 'RPL10A', 'RPL12', 'RPL13', 'RPL15', 'RPL17', 'RPL18', 'RPL21', 'RPL23A', 'RPL24', 'RPL26', 'RPL3', 'RPL32', 'RPL34', 'RPL36A', 'RPL4', 'RPL41', 'RPL5', 'RPL6', 'RPL7', 'RPL7A', 'RPL8', 'RPL9', 'RPLP0', 'RPS10', 'RPS18', 'RPS19', 'RPS2', 'RPS27A', 'RPS28', 'RPS3', 'RPS3A', 'RPS4X', 'RPS5', 'RPS6', 'RPS8', 'RPS9', 'RPSA', 'ZFP36']
28	GO:BP	GO:0046700	heterocycle catabolic process	4.78896e-23	TRUE	"The chemical reactions and pathways resulting in the breakdown of heterocyclic compounds, those with a cyclic molecular structure and at least two different atoms in the ring (or rings)." [GOC:ai]	617	155	42	18123	0.270968	0.0680713	FB3	['GO:0044248', 'GO:0046483']	['BTG2', 'CIRBP', 'NPM1', 'RPL10', 'RPL10A', 'RPL12', 'RPL13', 'RPL15', 'RPL17', 'RPL18', 'RPL21', 'RPL23A', 'RPL24', 'RPL26', 'RPL3', 'RPL32', 'RPL34', 'RPL36A', 'RPL4', 'RPL41', 'RPL5', 'RPL6', 'RPL7', 'RPL7A', 'RPL8', 'RPL9', 'RPLP0', 'RPS10', 'RPS18', 'RPS19', 'RPS2', 'RPS27A', 'RPS28', 'RPS3', 'RPS3A', 'RPS4X', 'RPS5', 'RPS6', 'RPS8', 'RPS9', 'RPSA', 'ZFP36']
29	GO:BP	GO:0072657	protein localization to membrane	5.75504e-23	TRUE	"A process in which a protein is transported to, or maintained in, a specific location in a membrane." [GOC:mah]	698	155	44	18123	0.283871	0.0630372	FB3	['GO:0034613', 'GO:0051668']	['APOE', 'DAG1', 'NACA', 'RAPSN', 'RPL10', 'RPL10A', 'RPL12', 'RPL13', 'RPL15', 'RPL17', 'RPL18', 'RPL21', 'RPL23A', 'RPL24', 'RPL26', 'RPL3', 'RPL32', 'RPL34', 'RPL36A', 'RPL4', 'RPL41', 'RPL5', 'RPL6', 'RPL7', 'RPL7A', 'RPL8', 'RPL9', 'RPLP0', 'RPS10', 'RPS18', 'RPS19', 'RPS2', 'RPS27A', 'RPS28', 'RPS3', 'RPS3A', 'RPS4X', 'RPS5', 'RPS6', 'RPS8', 'RPS9', 'RPSA', 'STAC3', 'TSPAN15']
30	GO:BP	GO:0044270	cellular nitrogen compound catabolic process	7.02164e-23	TRUE	"The chemical reactions and pathways resulting in the breakdown of organic and inorganic nitrogenous compounds." [GOC:jl, ISBN:0198506732]	623	155	42	18123	0.270968	0.0674157	FB3	['GO:0034641', 'GO:0044248']	['BTG2', 'CIRBP', 'NPM1', 'RPL10', 'RPL10A', 'RPL12', 'RPL13', 'RPL15', 'RPL17', 'RPL18', 'RPL21', 'RPL23A', 'RPL24', 'RPL26', 'RPL3', 'RPL32', 'RPL34', 'RPL36A', 'RPL4', 'RPL41', 'RPL5', 'RPL6', 'RPL7', 'RPL7A', 'RPL8', 'RPL9', 'RPLP0', 'RPS10', 'RPS18', 'RPS19', 'RPS2', 'RPS27A', 'RPS28', 'RPS3', 'RPS3A', 'RPS4X', 'RPS5', 'RPS6', 'RPS8', 'RPS9', 'RPSA', 'ZFP36']
31	GO:BP	GO:1901361	organic cyclic compound catabolic process	8.09099e-23	TRUE	"The chemical reactions and pathways resulting in the breakdown of organic cyclic compound." [GOC:TermGenie]	664	155	43	18123	0.277419	0.064759	FB3	['GO:1901360', 'GO:1901575']	['APOE', 'BTG2', 'CIRBP', 'NPM1', 'RPL10', 'RPL10A', 'RPL12', 'RPL13', 'RPL15', 'RPL17', 'RPL18', 'RPL21', 'RPL23A', 'RPL24', 'RPL26', 'RPL3', 'RPL32', 'RPL34', 'RPL36A', 'RPL4', 'RPL41', 'RPL5', 'RPL6', 'RPL7', 'RPL7A', 'RPL8', 'RPL9', 'RPLP0', 'RPS10', 'RPS18', 'RPS19', 'RPS2', 'RPS27A', 'RPS28', 'RPS3', 'RPS3A', 'RPS4X', 'RPS5', 'RPS6', 'RPS8', 'RPS9', 'RPSA', 'ZFP36']
32	GO:BP	GO:0051668	localization within membrane	4.264e-22	TRUE	"Any process in which a substance or cellular entity, such as a protein complex or organelle, is transported to, and/or maintained in, a specific location within a membrane." [GOC:ai]	775	155	45	18123	0.290323	0.0580645	FB3	['GO:0051641']	['APOE', 'DAG1', 'MAL', 'NACA', 'RAPSN', 'RPL10', 'RPL10A', 'RPL12', 'RPL13', 'RPL15', 'RPL17', 'RPL18', 'RPL21', 'RPL23A', 'RPL24', 'RPL26', 'RPL3', 'RPL32', 'RPL34', 'RPL36A', 'RPL4', 'RPL41', 'RPL5', 'RPL6', 'RPL7', 'RPL7A', 'RPL8', 'RPL9', 'RPLP0', 'RPS10', 'RPS18', 'RPS19', 'RPS2', 'RPS27A', 'RPS28', 'RPS3', 'RPS3A', 'RPS4X', 'RPS5', 'RPS6', 'RPS8', 'RPS9', 'RPSA', 'STAC3', 'TSPAN15']
33	GO:BP	GO:0043603	cellular amide metabolic process	1.56591e-21	TRUE	"The chemical reactions and pathways involving an amide, any derivative of an oxoacid in which an acidic hydroxy group has been replaced by an amino or substituted amino group, as carried out by individual cells." [GOC:curators]	1284	155	55	18123	0.354839	0.0428349	FB3	['GO:0034641']	['APOE', 'ATF3', 'BTG2', 'CIRBP', 'EEF2', 'EIF3L', 'EIF4A2', 'GAPDH', 'MIR24-2', 'MYC', 'NACA', 'NPM1', 'PDK4', 'RPL10', 'RPL10A', 'RPL12', 'RPL13', 'RPL15', 'RPL17', 'RPL18', 'RPL21', 'RPL23A', 'RPL24', 'RPL26', 'RPL3', 'RPL32', 'RPL34', 'RPL36A', 'RPL4', 'RPL41', 'RPL5', 'RPL6', 'RPL7', 'RPL7A', 'RPL8', 'RPL9', 'RPLP0', 'RPS10', 'RPS18', 'RPS19', 'RPS2', 'RPS27A', 'RPS28', 'RPS3', 'RPS3A', 'RPS…
34	GO:BP	GO:0010629	negative regulation of gene expression	6.67603e-18	TRUE	"Any process that decreases the frequency, rate or extent of gene expression. Gene expression is the process in which a gene's coding sequence is converted into a mature gene product or products (proteins or RNA). This includes the production of an RNA transcript as well as any processing to produce a mature RNA product or an mRNA or circRNA (for protein-coding genes) and the translation of that …	1470	155	54	18123	0.348387	0.0367347	FB3	['GO:0010467', 'GO:0010468', 'GO:0010605']	['APOE', 'BMP4', 'BST2', 'BTG2', 'CIRBP', 'CLDN5', 'GAPDH', 'HSP90AB1', 'MIR24-2', 'MYC', 'NDRG2', 'NPM1', 'RPL10', 'RPL10A', 'RPL12', 'RPL13', 'RPL15', 'RPL17', 'RPL18', 'RPL21', 'RPL23A', 'RPL24', 'RPL26', 'RPL3', 'RPL32', 'RPL34', 'RPL36A', 'RPL4', 'RPL41', 'RPL5', 'RPL6', 'RPL7', 'RPL7A', 'RPL8', 'RPL9', 'RPLP0', 'RPS10', 'RPS18', 'RPS19', 'RPS2', 'RPS27A', 'RPS28', 'RPS3', 'RPS3A', 'RPS4X', …
35	GO:BP	GO:0006886	intracellular protein transport	1.10754e-17	TRUE	"The directed movement of proteins in a cell, including the movement of proteins between specific compartments or structures within a cell, such as organelles of a eukaryotic cell." [GOC:mah]	995	155	45	18123	0.290323	0.0452261	FB3	['GO:0015031', 'GO:0034613', 'GO:0046907']	['BMP4', 'HSP90AB1', 'NACA', 'NPM1', 'RPL10', 'RPL10A', 'RPL12', 'RPL13', 'RPL15', 'RPL17', 'RPL18', 'RPL21', 'RPL23A', 'RPL24', 'RPL26', 'RPL3', 'RPL32', 'RPL34', 'RPL36A', 'RPL4', 'RPL41', 'RPL5', 'RPL6', 'RPL7', 'RPL7A', 'RPL8', 'RPL9', 'RPLP0', 'RPS10', 'RPS18', 'RPS19', 'RPS2', 'RPS27A', 'RPS28', 'RPS3', 'RPS3A', 'RPS4X', 'RPS5', 'RPS6', 'RPS8', 'RPS9', 'RPSA', 'RTN2', 'SLC25A6', 'SYTL2']
36	GO:BP	GO:0034470	ncRNA processing	1.26075e-17	TRUE	"Any process that results in the conversion of one or more primary non-coding RNA (ncRNA) transcripts into one or more mature ncRNA molecules." [GOC:mah]	439	155	32	18123	0.206452	0.0728929	FB3	['GO:0006396', 'GO:0034660']	['FBL', 'RPL10', 'RPL10A', 'RPL12', 'RPL13', 'RPL15', 'RPL17', 'RPL18', 'RPL21', 'RPL23A', 'RPL24', 'RPL26', 'RPL3', 'RPL32', 'RPL34', 'RPL36A', 'RPL4', 'RPL41', 'RPL5', 'RPL6', 'RPL7', 'RPL7A', 'RPL8', 'RPL9', 'RPLP0', 'RPS19', 'RPS2', 'RPS28', 'RPS6', 'RPS8', 'RPS9', 'RSL1D1']
37	GO:BP	GO:0033365	protein localization to organelle	3.53188e-17	TRUE	"A process in which a protein is transported to, or maintained in, a location within an organelle." [GOC:mah]	974	155	44	18123	0.283871	0.0451745	FB3	['GO:0034613']	['BMP4', 'CHCHD10', 'DAG1', 'HSP90AB1', 'NPM1', 'RPL10', 'RPL10A', 'RPL12', 'RPL13', 'RPL15', 'RPL17', 'RPL18', 'RPL21', 'RPL23A', 'RPL24', 'RPL26', 'RPL3', 'RPL32', 'RPL34', 'RPL36A', 'RPL4', 'RPL41', 'RPL5', 'RPL6', 'RPL7', 'RPL7A', 'RPL8', 'RPL9', 'RPLP0', 'RPS10', 'RPS18', 'RPS19', 'RPS2', 'RPS27A', 'RPS28', 'RPS3', 'RPS3A', 'RPS4X', 'RPS5', 'RPS6', 'RPS8', 'RPS9', 'RPSA', 'SLC25A6']
38	GO:BP	GO:0016071	mRNA metabolic process	4.166e-17	TRUE	"The chemical reactions and pathways involving mRNA, messenger RNA, which is responsible for carrying the coded genetic 'message', transcribed from DNA, to sites of protein assembly at the ribosomes." [ISBN:0198506732]	880	155	42	18123	0.270968	0.0477273	FB3	['GO:0016070']	['BTG2', 'CIRBP', 'NPM1', 'RPL10', 'RPL10A', 'RPL12', 'RPL13', 'RPL15', 'RPL17', 'RPL18', 'RPL21', 'RPL23A', 'RPL24', 'RPL26', 'RPL3', 'RPL32', 'RPL34', 'RPL36A', 'RPL4', 'RPL41', 'RPL5', 'RPL6', 'RPL7', 'RPL7A', 'RPL8', 'RPL9', 'RPLP0', 'RPS10', 'RPS18', 'RPS19', 'RPS2', 'RPS27A', 'RPS28', 'RPS3', 'RPS3A', 'RPS4X', 'RPS5', 'RPS6', 'RPS8', 'RPS9', 'RPSA', 'ZFP36']
39	GO:BP	GO:1901566	organonitrogen compound biosynthetic process	7.96445e-16	TRUE	"The chemical reactions and pathways resulting in the formation of organonitrogen compound." [GOC:pr, GOC:TermGenie]	1889	155	58	18123	0.374194	0.0307041	FB3	['GO:1901564', 'GO:1901576']	['ALDOA', 'APOE', 'ATF3', 'BTG2', 'CIRBP', 'EEF2', 'EIF3L', 'EIF4A2', 'FABP5', 'GAPDH', 'IMPDH2', 'MYC', 'NACA', 'NPM1', 'NPPC', 'NUDT14', 'PDK4', 'RPL10', 'RPL10A', 'RPL12', 'RPL13', 'RPL15', 'RPL17', 'RPL18', 'RPL21', 'RPL23A', 'RPL24', 'RPL26', 'RPL3', 'RPL32', 'RPL34', 'RPL36A', 'RPL4', 'RPL41', 'RPL5', 'RPL6', 'RPL7', 'RPL7A', 'RPL8', 'RPL9', 'RPLP0', 'RPS10', 'RPS18', 'RPS19', 'RPS2', 'RPS2…
40	GO:BP	GO:0034660	ncRNA metabolic process	4.56424e-15	TRUE	"The chemical reactions and pathways involving non-coding RNA transcripts (ncRNAs)." [GOC:mah]	535	155	32	18123	0.206452	0.0598131	FB3	['GO:0016070']	['FBL', 'RPL10', 'RPL10A', 'RPL12', 'RPL13', 'RPL15', 'RPL17', 'RPL18', 'RPL21', 'RPL23A', 'RPL24', 'RPL26', 'RPL3', 'RPL32', 'RPL34', 'RPL36A', 'RPL4', 'RPL41', 'RPL5', 'RPL6', 'RPL7', 'RPL7A', 'RPL8', 'RPL9', 'RPLP0', 'RPS19', 'RPS2', 'RPS28', 'RPS6', 'RPS8', 'RPS9', 'RSL1D1']
41	GO:BP	GO:0009892	negative regulation of metabolic process	6.40085e-15	TRUE	"Any process that stops, prevents, or reduces the frequency, rate or extent of the chemical reactions and pathways within a cell or an organism." [GOC:go_curators]	3498	155	78	18123	0.503226	0.0222985	FB3	['GO:0008152', 'GO:0019222', 'GO:0048519']	['ALDH1A1', 'APOC1', 'APOE', 'ATF3', 'BMP4', 'BST2', 'BTG2', 'CDKN1C', 'CIRBP', 'CLDN5', 'DDIT4', 'EGR1', 'EIF4A2', 'FOSB', 'GADD45B', 'GAPDH', 'GREM1', 'HES1', 'HEY1', 'HSP90AB1', 'JUN', 'KLF10', 'MIDN', 'MIR24-2', 'MSC', 'MYC', 'MYF6', 'NACA', 'NDRG2', 'NPM1', 'NPPC', 'PITX2', 'PPP1R14B', 'RPL10', 'RPL10A', 'RPL12', 'RPL13', 'RPL15', 'RPL17', 'RPL18', 'RPL21', 'RPL23A', 'RPL24', 'RPL26', 'RPL3'…
42	GO:BP	GO:0048519	negative regulation of biological process	2.19876e-14	TRUE	"Any process that stops, prevents, or reduces the frequency, rate or extent of a biological process. Biological processes are regulated by many means; examples include the control of gene expression, protein modification or interaction with a protein or substrate molecule." [GOC:jid]	5861	155	102	18123	0.658065	0.0174032	FB3	['GO:0008150', 'GO:0050789']	['ALDH1A1', 'ANGPTL4', 'APOC1', 'APOE', 'ATF3', 'BMP4', 'BST2', 'BTG1', 'BTG2', 'CCL2', 'CDKN1C', 'CIRBP', 'CLDN5', 'COL18A1', 'DAG1', 'DDIT4', 'DLK1', 'EGR1', 'EIF4A2', 'FABP5', 'FOSB', 'FRZB', 'GADD45B', 'GAPDH', 'GPM6B', 'GREM1', 'HES1', 'HEY1', 'HLA-E', 'HSP90AB1', 'IL32', 'JSRP1', 'JUN', 'KLF10', 'MIDN', 'MIR24-2', 'MSC', 'MT1E', 'MT1M', 'MT1X', 'MT2A', 'MYC', 'MYF6', 'NACA', 'NDRG2', 'NOTCH…
43	GO:BP	GO:0010605	negative regulation of macromolecule metabolic process	3.5511e-14	TRUE	"Any process that decreases the frequency, rate or extent of the chemical reactions and pathways involving macromolecules, any molecule of high relative molecular mass, the structure of which essentially comprises the multiple repetition of units derived, actually or conceptually, from molecules of low relative molecular mass." [GOC:dph, GOC:tb]	3262	155	74	18123	0.477419	0.0226855	FB3	['GO:0009892', 'GO:0043170', 'GO:0060255']	['APOE', 'ATF3', 'BMP4', 'BST2', 'BTG2', 'CDKN1C', 'CIRBP', 'CLDN5', 'DDIT4', 'EGR1', 'EIF4A2', 'FOSB', 'GADD45B', 'GAPDH', 'GREM1', 'HES1', 'HEY1', 'HSP90AB1', 'JUN', 'KLF10', 'MIR24-2', 'MSC', 'MYC', 'MYF6', 'NACA', 'NDRG2', 'NPM1', 'NPPC', 'PITX2', 'PPP1R14B', 'RPL10', 'RPL10A', 'RPL12', 'RPL13', 'RPL15', 'RPL17', 'RPL18', 'RPL21', 'RPL23A', 'RPL24', 'RPL26', 'RPL3', 'RPL32', 'RPL34', 'RPL36A'…
44	GO:BP	GO:0044265	cellular macromolecule catabolic process	6.53493e-14	TRUE	"The chemical reactions and pathways resulting in the breakdown of a macromolecule, any large molecule including proteins, nucleic acids and carbohydrates, as carried out by individual cells." [GOC:jl]	1244	155	45	18123	0.290323	0.0361736	FB3	['GO:0009057', 'GO:0044248', 'GO:0044260']	['APOE', 'BTG2', 'CIRBP', 'HSP90AB1', 'NPM1', 'RPL10', 'RPL10A', 'RPL12', 'RPL13', 'RPL15', 'RPL17', 'RPL18', 'RPL21', 'RPL23A', 'RPL24', 'RPL26', 'RPL3', 'RPL32', 'RPL34', 'RPL36A', 'RPL4', 'RPL41', 'RPL5', 'RPL6', 'RPL7', 'RPL7A', 'RPL8', 'RPL9', 'RPLP0', 'RPS10', 'RPS18', 'RPS19', 'RPS2', 'RPS27A', 'RPS28', 'RPS3', 'RPS3A', 'RPS4X', 'RPS5', 'RPS6', 'RPS8', 'RPS9', 'RPSA', 'SIRT2', 'ZFP36']
45	GO:BP	GO:0009888	tissue development	6.87915e-14	TRUE	"The process whose specific outcome is the progression of a tissue over time, from its formation to the mature structure." [ISBN:0471245208]	2093	92	43	18123	0.467391	0.0205447	FB2	['GO:0048856']	['ALPL', 'ASPN', 'BGN', 'CCND1', 'COL11A1', 'COL1A1', 'COL1A2', 'COL4A1', 'COL4A2', 'COL5A2', 'COL6A1', 'EDNRA', 'EDNRB', 'GPC3', 'HES1', 'HEY2', 'ID3', 'INHBA', 'KRT16', 'KRT17', 'LAMC3', 'LMO4', 'LUM', 'MAGED1', 'MDK', 'MEF2C', 'PALLD', 'POSTN', 'PTCH1', 'RAB13', 'RBP4', 'ROBO2', 'SERPINE2', 'SERPINH1', 'SNAI2', 'SOX4', 'TAGLN', 'TMEM119', 'TNMD', 'TRPS1', 'VIM', 'WNT5A', 'WWTR1']
46	GO:BP	GO:0001503	ossification	2.25196e-13	TRUE	"The formation of bone or of a bony substance, or the conversion of fibrous tissue or of cartilage into bone or a bony substance." [GOC:mtg_mpo, PMID:17572649]	418	92	22	18123	0.23913	0.0526316	FB2	['GO:0032501']	['ALPL', 'ASPN', 'CDH11', 'CLEC11A', 'COL11A1', 'COL1A1', 'COL1A2', 'COL5A2', 'COL6A1', 'CREB3L1', 'GPC3', 'ID3', 'MDK', 'MEF2C', 'PTCH1', 'SNAI2', 'SPARC', 'TMEM119', 'TNN', 'VCAN', 'WNT5A', 'WWTR1']
47	GO:BP	GO:0030198	extracellular matrix organization	2.3678e-13	TRUE	"A process that is carried out at the cellular level which results in the assembly, arrangement of constituent parts, or disassembly of an extracellular matrix." [GOC:mah]	419	92	22	18123	0.23913	0.052506	FB2	['GO:0043062', 'GO:0045229']	['ADAMTS18', 'BGN', 'COL11A1', 'COL1A1', 'COL1A2', 'COL21A1', 'COL3A1', 'COL4A1', 'COL4A2', 'COL5A2', 'COL6A1', 'COL6A3', 'CREB3L1', 'FSCN1', 'HAPLN1', 'LAMC3', 'LUM', 'MFAP2', 'POSTN', 'SERPINH1', 'SPARC', 'VCAN']
48	GO:BP	GO:0043062	extracellular structure organization	2.48927e-13	TRUE	"A process that is carried out at the cellular level which results in the assembly, arrangement of constituent parts, or disassembly of structures in the space external to the outermost structure of a cell. For cells without external protective or external encapsulating structures this refers to space outside of the plasma membrane, and also covers the host cell environment outside an intracellul…	420	92	22	18123	0.23913	0.052381	FB2	['GO:0016043']	['ADAMTS18', 'BGN', 'COL11A1', 'COL1A1', 'COL1A2', 'COL21A1', 'COL3A1', 'COL4A1', 'COL4A2', 'COL5A2', 'COL6A1', 'COL6A3', 'CREB3L1', 'FSCN1', 'HAPLN1', 'LAMC3', 'LUM', 'MFAP2', 'POSTN', 'SERPINH1', 'SPARC', 'VCAN']
49	GO:BP	GO:0042255	ribosome assembly	2.51992e-13	TRUE	"The aggregation, arrangement and bonding together of the mature ribosome and of its subunits." [GOC:ma]	62	155	14	18123	0.0903226	0.225806	FB3	['GO:0042254', 'GO:0070925']	['NPM1', 'RPL10', 'RPL23A', 'RPL24', 'RPL3', 'RPL5', 'RPL6', 'RPLP0', 'RPS10', 'RPS19', 'RPS28', 'RPS5', 'RPSA', 'RSL24D1']
50	GO:BP	GO:0045229	external encapsulating structure organization	2.75014e-13	TRUE	"A process that is carried out at the cellular level which results in the assembly, arrangement of constituent parts, or disassembly of external structures that lie outside the plasma membrane and surround the entire cell." [GOC:ai, GOC:dph, GOC:jl, GOC:mah]	422	92	22	18123	0.23913	0.0521327	FB2	['GO:0016043']	['ADAMTS18', 'BGN', 'COL11A1', 'COL1A1', 'COL1A2', 'COL21A1', 'COL3A1', 'COL4A1', 'COL4A2', 'COL5A2', 'COL6A1', 'COL6A3', 'CREB3L1', 'FSCN1', 'HAPLN1', 'LAMC3', 'LUM', 'MFAP2', 'POSTN', 'SERPINH1', 'SPARC', 'VCAN']
51	GO:BP	GO:0009653	anatomical structure morphogenesis	6.24868e-13	TRUE	"The process in which anatomical structures are generated and organized. Morphogenesis pertains to the creation of form." [GOC:go_curators, ISBN:0521436125]	2816	92	48	18123	0.521739	0.0170455	FB2	['GO:0032502', 'GO:0048856']	['ALPL', 'ASPN', 'CALD1', 'CDH11', 'COL11A1', 'COL1A1', 'COL1A2', 'COL4A1', 'COL4A2', 'COL5A2', 'COL6A1', 'CREB3L1', 'DKK3', 'EDNRA', 'ENPP2', 'F2R', 'GPC3', 'HES1', 'HEY2', 'HMGN1', 'ID3', 'INHBA', 'KRT16', 'KRT17', 'LAMC3', 'LMO4', 'MAGED1', 'MDK', 'MEF2C', 'MFAP2', 'NOTCH3', 'PALLD', 'PLK2', 'POSTN', 'PTCH1', 'RBP4', 'ROBO2', 'SERPINE2', 'SERPINH1', 'SNAI2', 'SOX4', 'SPARC', 'STMN1', 'TMEM119'…
52	GO:BP	GO:0070727	cellular macromolecule localization	1.13538e-12	TRUE	"Any process in which a macromolecule is transported to, and/or maintained in, a specific location at the level of a cell. Localization at the cellular level encompasses movement within the cell, from within the cell to the cell surface, or from one location to another at the surface of a cell." [GOC:mah]	1856	155	53	18123	0.341935	0.028556	FB3	['GO:0033036', 'GO:0051641']	['APOE', 'BMP4', 'CHCHD10', 'DAG1', 'GPM6B', 'HSP90AB1', 'NACA', 'NPM1', 'RAPSN', 'RPL10', 'RPL10A', 'RPL12', 'RPL13', 'RPL15', 'RPL17', 'RPL18', 'RPL21', 'RPL23A', 'RPL24', 'RPL26', 'RPL3', 'RPL32', 'RPL34', 'RPL36A', 'RPL4', 'RPL41', 'RPL5', 'RPL6', 'RPL7', 'RPL7A', 'RPL8', 'RPL9', 'RPLP0', 'RPS10', 'RPS18', 'RPS19', 'RPS2', 'RPS27A', 'RPS28', 'RPS3', 'RPS3A', 'RPS4X', 'RPS5', 'RPS6', 'RPS8', '…
53	GO:BP	GO:0042273	ribosomal large subunit biogenesis	2.40723e-12	TRUE	"A cellular process that results in the biosynthesis of constituent macromolecules, assembly, and arrangement of constituent parts of a large ribosomal subunit; includes transport to the sites of protein synthesis." [GOC:jl]	72	155	14	18123	0.0903226	0.194444	FB3	['GO:0022613', 'GO:0042254']	['NPM1', 'RPL10', 'RPL10A', 'RPL23A', 'RPL24', 'RPL26', 'RPL3', 'RPL5', 'RPL6', 'RPL7', 'RPL7A', 'RPLP0', 'RSL1D1', 'RSL24D1']
54	GO:BP	GO:0034613	cellular protein localization	3.85895e-12	TRUE	"Any process in which a protein is transported to, and/or maintained in, a specific location at the level of a cell. Localization at the cellular level encompasses movement within the cell, from within the cell to the cell surface, or from one location to another at the surface of a cell." [GOC:mah]	1842	155	52	18123	0.335484	0.0282302	FB3	['GO:0008104', 'GO:0070727']	['APOE', 'BMP4', 'CHCHD10', 'DAG1', 'GPM6B', 'HSP90AB1', 'NACA', 'NPM1', 'RAPSN', 'RPL10', 'RPL10A', 'RPL12', 'RPL13', 'RPL15', 'RPL17', 'RPL18', 'RPL21', 'RPL23A', 'RPL24', 'RPL26', 'RPL3', 'RPL32', 'RPL34', 'RPL36A', 'RPL4', 'RPL41', 'RPL5', 'RPL6', 'RPL7', 'RPL7A', 'RPL8', 'RPL9', 'RPLP0', 'RPS10', 'RPS18', 'RPS19', 'RPS2', 'RPS27A', 'RPS28', 'RPS3', 'RPS3A', 'RPS4X', 'RPS5', 'RPS6', 'RPS8', '…
55	GO:BP	GO:0048731	system development	1.00208e-11	TRUE	"The process whose specific outcome is the progression of an organismal system over time, from its formation to the mature structure. A system is a regularly interacting or interdependent group of organs or tissues that work together to carry out a given biological process." [GOC:dph, GOC:jid]	5095	92	62	18123	0.673913	0.0121688	FB2	['GO:0007275', 'GO:0048856']	['ADAMTS18', 'ALPL', 'ASPN', 'BGN', 'CALD1', 'CCND1', 'CDH11', 'COL11A1', 'COL1A1', 'COL1A2', 'COL3A1', 'COL4A1', 'COL4A2', 'COL5A2', 'COL6A3', 'CREB3L1', 'DKK3', 'EDNRA', 'EDNRB', 'ENPP2', 'GPC3', 'HAPLN1', 'HES1', 'HEY2', 'HMGN1', 'ID3', 'INHBA', 'KRT16', 'KRT17', 'LAMC3', 'LMO4', 'LUM', 'MAGED1', 'MARCKSL1', 'MDK', 'MEF2C', 'MFAP2', 'NAP1L1', 'NOTCH3', 'PALLD', 'PLK2', 'POSTN', 'PTCH1', 'RAB13…
56	GO:BP	GO:0009057	macromolecule catabolic process	3.9833e-11	TRUE	"The chemical reactions and pathways resulting in the breakdown of a macromolecule, any molecule of high relative molecular mass, the structure of which essentially comprises the multiple repetition of units derived, actually or conceptually, from molecules of low relative molecular mass." [GOC:mah]	1479	155	45	18123	0.290323	0.030426	FB3	['GO:0043170', 'GO:1901575']	['APOE', 'BTG2', 'CIRBP', 'HSP90AB1', 'NPM1', 'RPL10', 'RPL10A', 'RPL12', 'RPL13', 'RPL15', 'RPL17', 'RPL18', 'RPL21', 'RPL23A', 'RPL24', 'RPL26', 'RPL3', 'RPL32', 'RPL34', 'RPL36A', 'RPL4', 'RPL41', 'RPL5', 'RPL6', 'RPL7', 'RPL7A', 'RPL8', 'RPL9', 'RPLP0', 'RPS10', 'RPS18', 'RPS19', 'RPS2', 'RPS27A', 'RPS28', 'RPS3', 'RPS3A', 'RPS4X', 'RPS5', 'RPS6', 'RPS8', 'RPS9', 'RPSA', 'SIRT2', 'ZFP36']
57	GO:BP	GO:0015031	protein transport	2.2537e-10	TRUE	"The directed movement of proteins into, out of or within a cell, or between cells, by means of some agent such as a transporter or pore." [GOC:ai]	1754	155	48	18123	0.309677	0.027366	FB3	['GO:0045184', 'GO:0071702', 'GO:0071705']	['APOE', 'BMP4', 'GPM6B', 'HSP90AB1', 'MIDN', 'NACA', 'NPM1', 'RPL10', 'RPL10A', 'RPL12', 'RPL13', 'RPL15', 'RPL17', 'RPL18', 'RPL21', 'RPL23A', 'RPL24', 'RPL26', 'RPL3', 'RPL32', 'RPL34', 'RPL36A', 'RPL4', 'RPL41', 'RPL5', 'RPL6', 'RPL7', 'RPL7A', 'RPL8', 'RPL9', 'RPLP0', 'RPS10', 'RPS18', 'RPS19', 'RPS2', 'RPS27A', 'RPS28', 'RPS3', 'RPS3A', 'RPS4X', 'RPS5', 'RPS6', 'RPS8', 'RPS9', 'RPSA', 'RTN2…
58	GO:BP	GO:0030198	extracellular matrix organization	2.42009e-10	TRUE	"A process that is carried out at the cellular level which results in the assembly, arrangement of constituent parts, or disassembly of an extracellular matrix." [GOC:mah]	419	168	25	18123	0.14881	0.0596659	FB1	['GO:0043062', 'GO:0045229']	['ABI3BP', 'AEBP1', 'CCDC80', 'COL12A1', 'COL14A1', 'CST3', 'CTSK', 'DCN', 'DPT', 'ELN', 'FBLN1', 'FBLN2', 'FBLN5', 'FBN1', 'HSPG2', 'LRP1', 'LTBP4', 'MFAP4', 'MMP2', 'NTN4', 'RAMP2', 'SFRP2', 'TIMP1', 'TIMP2', 'TNXB']
59	GO:BP	GO:0043062	extracellular structure organization	2.55339e-10	TRUE	"A process that is carried out at the cellular level which results in the assembly, arrangement of constituent parts, or disassembly of structures in the space external to the outermost structure of a cell. For cells without external protective or external encapsulating structures this refers to space outside of the plasma membrane, and also covers the host cell environment outside an intracellul…	420	168	25	18123	0.14881	0.0595238	FB1	['GO:0016043']	['ABI3BP', 'AEBP1', 'CCDC80', 'COL12A1', 'COL14A1', 'CST3', 'CTSK', 'DCN', 'DPT', 'ELN', 'FBLN1', 'FBLN2', 'FBLN5', 'FBN1', 'HSPG2', 'LRP1', 'LTBP4', 'MFAP4', 'MMP2', 'NTN4', 'RAMP2', 'SFRP2', 'TIMP1', 'TIMP2', 'TNXB']
60	GO:BP	GO:0045229	external encapsulating structure organization	2.84115e-10	TRUE	"A process that is carried out at the cellular level which results in the assembly, arrangement of constituent parts, or disassembly of external structures that lie outside the plasma membrane and surround the entire cell." [GOC:ai, GOC:dph, GOC:jl, GOC:mah]	422	168	25	18123	0.14881	0.0592417	FB1	['GO:0016043']	['ABI3BP', 'AEBP1', 'CCDC80', 'COL12A1', 'COL14A1', 'CST3', 'CTSK', 'DCN', 'DPT', 'ELN', 'FBLN1', 'FBLN2', 'FBLN5', 'FBN1', 'HSPG2', 'LRP1', 'LTBP4', 'MFAP4', 'MMP2', 'NTN4', 'RAMP2', 'SFRP2', 'TIMP1', 'TIMP2', 'TNXB']
61	GO:BP	GO:0048856	anatomical structure development	2.90226e-10	TRUE	"The biological process whose specific outcome is the progression of an anatomical structure from an initial condition to its mature state. This process begins with the formation of the structure and ends with the mature structure, whatever form that may be including its natural destruction. An anatomical structure is any biological entity that occupies space and is distinguished from its surroun…	6164	92	66	18123	0.717391	0.0107073	FB2	['GO:0032502']	['ADAMTS18', 'ALPL', 'ASPN', 'BGN', 'CALD1', 'CCND1', 'CDH11', 'COL11A1', 'COL1A1', 'COL1A2', 'COL3A1', 'COL4A1', 'COL4A2', 'COL5A2', 'COL6A1', 'COL6A3', 'CREB3L1', 'DKK3', 'EDNRA', 'EDNRB', 'ENPP2', 'F2R', 'GPC3', 'HAPLN1', 'HES1', 'HEY2', 'HMGN1', 'ID3', 'IL11RA', 'INHBA', 'KRT16', 'KRT17', 'LAMC3', 'LMO4', 'LUM', 'MAGED1', 'MARCKSL1', 'MDK', 'MEF2C', 'MFAP2', 'NAP1L1', 'NOTCH3', 'PALLD', 'PLK2…
62	GO:BP	GO:0007275	multicellular organism development	4.47348e-10	TRUE	"The biological process whose specific outcome is the progression of a multicellular organism over time from an initial condition (e.g. a zygote or a young adult) to a later condition (e.g. a multicellular animal or an aged adult)." [GOC:dph, GOC:ems, GOC:isa_complete, GOC:tb]	5670	92	63	18123	0.684783	0.0111111	FB2	['GO:0032501', 'GO:0048856']	['ADAMTS18', 'ALPL', 'ASPN', 'BGN', 'CALD1', 'CCND1', 'CDH11', 'COL11A1', 'COL1A1', 'COL1A2', 'COL3A1', 'COL4A1', 'COL4A2', 'COL5A2', 'COL6A1', 'COL6A3', 'CREB3L1', 'DKK3', 'EDNRA', 'EDNRB', 'ENPP2', 'GPC3', 'HAPLN1', 'HES1', 'HEY2', 'HMGN1', 'ID3', 'INHBA', 'KRT16', 'KRT17', 'LAMC3', 'LMO4', 'LUM', 'MAGED1', 'MARCKSL1', 'MDK', 'MEF2C', 'MFAP2', 'NAP1L1', 'NOTCH3', 'PALLD', 'PLK2', 'POSTN', 'PTCH…
63	GO:BP	GO:0045184	establishment of protein localization	5.44532e-10	TRUE	"The directed movement of a protein to a specific location." [GOC:bf]	1866	155	49	18123	0.316129	0.0262594	FB3	['GO:0008104', 'GO:0051234']	['APOE', 'BMP4', 'GPM6B', 'HSP90AB1', 'MIDN', 'NACA', 'NPM1', 'RAPSN', 'RPL10', 'RPL10A', 'RPL12', 'RPL13', 'RPL15', 'RPL17', 'RPL18', 'RPL21', 'RPL23A', 'RPL24', 'RPL26', 'RPL3', 'RPL32', 'RPL34', 'RPL36A', 'RPL4', 'RPL41', 'RPL5', 'RPL6', 'RPL7', 'RPL7A', 'RPL8', 'RPL9', 'RPLP0', 'RPS10', 'RPS18', 'RPS19', 'RPS2', 'RPS27A', 'RPS28', 'RPS3', 'RPS3A', 'RPS4X', 'RPS5', 'RPS6', 'RPS8', 'RPS9', 'RPS…
64	GO:BP	GO:0030199	collagen fibril organization	5.6307e-10	TRUE	"Any process that determines the size and arrangement of collagen fibrils within an extracellular matrix." [GOC:mah, ISBN:0815316194]	109	92	12	18123	0.130435	0.110092	FB2	['GO:0030198', 'GO:0097435']	['COL11A1', 'COL1A1', 'COL1A2', 'COL21A1', 'COL3A1', 'COL4A1', 'COL4A2', 'COL5A2', 'COL6A1', 'COL6A3', 'LUM', 'SERPINH1']
65	GO:BP	GO:0001501	skeletal system development	1.58888e-09	TRUE	"The process whose specific outcome is the progression of the skeleton over time, from its formation to the mature structure. The skeleton is the bony framework of the body in vertebrates (endoskeleton) or the hard outer envelope of insects (exoskeleton or dermoskeleton)." [GOC:dph, GOC:jid, GOC:tb]	509	92	20	18123	0.217391	0.0392927	FB2	['GO:0048731']	['ALPL', 'BGN', 'CDH11', 'COL11A1', 'COL1A1', 'COL1A2', 'COL3A1', 'COL5A2', 'HAPLN1', 'LUM', 'MDK', 'MEF2C', 'RBP4', 'SERPINH1', 'SNAI2', 'SOX4', 'TMEM119', 'TRPS1', 'VCAN', 'WNT5A']
66	GO:BP	GO:0006396	RNA processing	1.59995e-09	TRUE	"Any process involved in the conversion of one or more primary RNA transcripts into one or more mature RNA molecules." [GOC:mah]	1010	155	35	18123	0.225806	0.0346535	FB3	['GO:0010467', 'GO:0016070']	['BMP4', 'CIRBP', 'FBL', 'NPM1', 'RPL10', 'RPL10A', 'RPL12', 'RPL13', 'RPL15', 'RPL17', 'RPL18', 'RPL21', 'RPL23A', 'RPL24', 'RPL26', 'RPL3', 'RPL32', 'RPL34', 'RPL36A', 'RPL4', 'RPL41', 'RPL5', 'RPL6', 'RPL7', 'RPL7A', 'RPL8', 'RPL9', 'RPLP0', 'RPS19', 'RPS2', 'RPS28', 'RPS6', 'RPS8', 'RPS9', 'RSL1D1']
67	GO:BP	GO:0046907	intracellular transport	2.1244e-09	TRUE	"The directed movement of substances within a cell." [GOC:ai]	1723	155	46	18123	0.296774	0.0266976	FB3	['GO:0006810', 'GO:0051641', 'GO:0051649']	['APOE', 'BMP4', 'HSP90AB1', 'NACA', 'NPM1', 'RPL10', 'RPL10A', 'RPL12', 'RPL13', 'RPL15', 'RPL17', 'RPL18', 'RPL21', 'RPL23A', 'RPL24', 'RPL26', 'RPL3', 'RPL32', 'RPL34', 'RPL36A', 'RPL4', 'RPL41', 'RPL5', 'RPL6', 'RPL7', 'RPL7A', 'RPL8', 'RPL9', 'RPLP0', 'RPS10', 'RPS18', 'RPS19', 'RPS2', 'RPS27A', 'RPS28', 'RPS3', 'RPS3A', 'RPS4X', 'RPS5', 'RPS6', 'RPS8', 'RPS9', 'RPSA', 'RTN2', 'SLC25A6', 'SY…
68	GO:BP	GO:0061061	muscle structure development	2.37184e-09	TRUE	"The progression of a muscle structure over time, from its formation to its mature state. Muscle structures are contractile cells, tissues or organs that are found in multicellular organisms." [GOC:dph]	646	155	28	18123	0.180645	0.0433437	FB3	['GO:0048856']	['ATF3', 'BMP4', 'BTG1', 'BTG2', 'CDH15', 'CHODL', 'CHRNA1', 'DAG1', 'EEF2', 'EGR1', 'FOS', 'GREM1', 'HES1', 'HEY1', 'KLHL41', 'MAFF', 'MIR24-2', 'MSC', 'MYF5', 'MYF6', 'NACA', 'PAX7', 'PDLIM3', 'PDLIM4', 'SGCA', 'SIRT2', 'STAC3', 'TAGLN']
69	GO:BP	GO:0032502	developmental process	4.29339e-09	TRUE	"A biological process whose specific outcome is the progression of an integrated living unit: an anatomical structure (which may be a subcellular structure, cell, tissue, or organ), or organism over time from an initial condition to a later condition." [GOC:isa_complete]	6678	92	67	18123	0.728261	0.0100329	FB2	['GO:0008150']	['ADAMTS18', 'ALPL', 'ASPN', 'BGN', 'CALD1', 'CCND1', 'CDH11', 'COL11A1', 'COL1A1', 'COL1A2', 'COL3A1', 'COL4A1', 'COL4A2', 'COL5A2', 'COL6A1', 'COL6A3', 'CREB3L1', 'DKK3', 'EDNRA', 'EDNRB', 'ENPP2', 'F2R', 'GPC3', 'HAPLN1', 'HES1', 'HEY2', 'HMGN1', 'ID3', 'IL11RA', 'INHBA', 'KRT16', 'KRT17', 'LAMC3', 'LMO4', 'LUM', 'MAGED1', 'MARCKSL1', 'MDK', 'MEF2C', 'MFAP2', 'NAP1L1', 'NOTCH3', 'NPM1', 'PALLD…
70	GO:BP	GO:0044271	cellular nitrogen compound biosynthetic process	8.54572e-09	TRUE	"The chemical reactions and pathways resulting in the formation of organic and inorganic nitrogenous compounds." [GOC:jl, ISBN:0198506732]	5054	155	84	18123	0.541935	0.0166205	FB3	['GO:0034641', 'GO:0044249']	['ADIRF', 'ALDOA', 'APOE', 'ATF3', 'BMP4', 'BTG1', 'BTG2', 'CDKN1C', 'CHCHD10', 'CIRBP', 'CSRNP1', 'EEF2', 'EGR1', 'EIF3L', 'EIF4A2', 'FGFR4', 'FOS', 'FOSB', 'GAPDH', 'GREM1', 'HES1', 'HEY1', 'HSP90AB1', 'IMPDH2', 'JUN', 'JUNB', 'KLF10', 'MAFF', 'MSC', 'MYC', 'MYF5', 'MYF6', 'NACA', 'NOTCH3', 'NPM1', 'NPPC', 'PAX7', 'PDK4', 'PITX2', 'RPL10', 'RPL10A', 'RPL12', 'RPL13', 'RPL15', 'RPL17', 'RPL18', …
71	GO:BP	GO:0007517	muscle organ development	1.68711e-08	TRUE	"The process whose specific outcome is the progression of the muscle over time, from its formation to the mature structure. The muscle is an organ consisting of a tissue made up of various elongated cells that are specialized to contract and thus to produce movement and mechanical work." [GOC:jid, ISBN:0198506732]	333	155	20	18123	0.129032	0.0600601	FB3	['GO:0048513', 'GO:0061061']	['ATF3', 'BMP4', 'BTG2', 'CHODL', 'CHRNA1', 'DAG1', 'EEF2', 'EGR1', 'FOS', 'KLHL41', 'MAFF', 'MSC', 'MYF5', 'MYF6', 'NACA', 'PAX7', 'SGCA', 'SIRT2', 'STAC3', 'TAGLN']
72	GO:BP	GO:1901575	organic substance catabolic process	2.1893e-08	TRUE	"The chemical reactions and pathways resulting in the breakdown of an organic substance, any molecular entity containing carbon." [GOC:pr, GOC:TermGenie]	2289	155	52	18123	0.335484	0.0227173	FB3	['GO:0009056', 'GO:0071704']	['ALDH1A1', 'ALDOA', 'APOC1', 'APOE', 'BTG2', 'CIRBP', 'DDIT4', 'FABP5', 'GAPDH', 'HSP90AB1', 'MYC', 'NPM1', 'RPL10', 'RPL10A', 'RPL12', 'RPL13', 'RPL15', 'RPL17', 'RPL18', 'RPL21', 'RPL23A', 'RPL24', 'RPL26', 'RPL3', 'RPL32', 'RPL34', 'RPL36A', 'RPL4', 'RPL41', 'RPL5', 'RPL6', 'RPL7', 'RPL7A', 'RPL8', 'RPL9', 'RPLP0', 'RPS10', 'RPS18', 'RPS19', 'RPS2', 'RPS27A', 'RPS28', 'RPS3', 'RPS3A', 'RPS4X'…
73	GO:BP	GO:0009887	animal organ morphogenesis	2.55264e-08	TRUE	"Morphogenesis of an animal organ. An organ is defined as a tissue or set of tissues that work together to perform a specific function or functions. Morphogenesis is the process in which anatomical structures are generated and organized. Organs are commonly observed as visibly distinct structures, but may also exist as loosely associated clusters of cells that work together to perform a specific …	1079	92	26	18123	0.282609	0.0240964	FB2	['GO:0009653', 'GO:0048513']	['ALPL', 'ASPN', 'COL11A1', 'COL1A1', 'COL1A2', 'COL5A2', 'GPC3', 'HES1', 'HEY2', 'HMGN1', 'ID3', 'INHBA', 'LAMC3', 'MAGED1', 'MDK', 'MEF2C', 'MFAP2', 'PTCH1', 'RBP4', 'ROBO2', 'SERPINH1', 'SNAI2', 'SOX4', 'TMEM119', 'WNT5A', 'WWTR1']
74	GO:BP	GO:0042127	regulation of cell population proliferation	3.36586e-08	TRUE	"Any process that modulates the frequency, rate or extent of cell proliferation." [GOC:jl]	1774	168	47	18123	0.279762	0.0264938	FB1	['GO:0008283', 'GO:0050794']	['ABI3BP', 'ACKR3', 'ADM', 'AKR1C2', 'AKR1C3', 'APOD', 'CD248', 'CD55', 'CD81', 'CLU', 'CTHRC1', 'CXCL12', 'DPT', 'ECM1', 'ELN', 'FBLN1', 'FTH1', 'GPNMB', 'IGFBP5', 'IGFBP6', 'IGFBP7', 'IL6ST', 'ITGB1BP1', 'JUND', 'LGALS3', 'MMP2', 'NDRG1', 'NUPR1', 'OSR2', 'PDGFD', 'PDGFRB', 'PMP22', 'PODN', 'PTGES', 'RBPJ', 'S100A11', 'S100A13', 'S100A6', 'SDCBP', 'SERPINF1', 'SFRP2', 'SFRP4', 'SLIT3', 'TGFBR3'…
75	GO:BP	GO:0008283	cell population proliferation	4.02795e-08	TRUE	"The multiplication or reproduction of cells, resulting in the expansion of a cell population." [GOC:mah, GOC:mb]	2057	168	51	18123	0.303571	0.0247934	FB1	['GO:0009987']	['ABI3BP', 'ACKR3', 'ADM', 'AKR1C2', 'AKR1C3', 'APOD', 'CD248', 'CD34', 'CD55', 'CD81', 'CLU', 'CTHRC1', 'CXCL12', 'DBN1', 'DPT', 'ECM1', 'ELN', 'FBLN1', 'FTH1', 'GPNMB', 'IGFBP5', 'IGFBP6', 'IGFBP7', 'IL6ST', 'ITGB1BP1', 'JUND', 'LEPR', 'LGALS3', 'LRP1', 'MMP2', 'NDRG1', 'NUPR1', 'OSR2', 'PDGFD', 'PDGFRB', 'PMP22', 'PODN', 'PTGES', 'RBPJ', 'S100A11', 'S100A13', 'S100A6', 'SDCBP', 'SERPINF1', 'SF…
76	GO:BP	GO:0010468	regulation of gene expression	5.30881e-08	TRUE	"Any process that modulates the frequency, rate or extent of gene expression. Gene expression is the process in which a gene's coding sequence is converted into a mature gene product or products (proteins or RNA). This includes the production of an RNA transcript as well as any processing to produce a mature RNA product or an mRNA or circRNA (for protein-coding genes) and the translation of that …	5218	155	84	18123	0.541935	0.0160981	FB3	['GO:0010467', 'GO:0060255']	['ADIRF', 'APOE', 'ATF3', 'BMP4', 'BST2', 'BTG1', 'BTG2', 'CDKN1C', 'CHCHD10', 'CIRBP', 'CLDN5', 'CSRNP1', 'EEF2', 'EGR1', 'EIF4A2', 'FGFR4', 'FOS', 'FOSB', 'GAPDH', 'GREM1', 'HES1', 'HEY1', 'HLA-E', 'HSP90AB1', 'IL32', 'JUN', 'JUNB', 'KLF10', 'MAFF', 'MIR24-2', 'MSC', 'MYC', 'MYF5', 'MYF6', 'NACA', 'NDRG2', 'NOTCH3', 'NPM1', 'PAX7', 'PITX2', 'RPL10', 'RPL10A', 'RPL12', 'RPL13', 'RPL15', 'RPL17',…
77	GO:BP	GO:0009059	macromolecule biosynthetic process	7.17819e-08	TRUE	"The chemical reactions and pathways resulting in the formation of a macromolecule, any molecule of high relative molecular mass, the structure of which essentially comprises the multiple repetition of units derived, actually or conceptually, from molecules of low relative molecular mass." [GOC:mah]	5145	155	83	18123	0.535484	0.0161322	FB3	['GO:0043170', 'GO:1901576']	['ADIRF', 'APOE', 'ATF3', 'BMP4', 'BTG1', 'BTG2', 'CCL2', 'CDKN1C', 'CHCHD10', 'CIRBP', 'CSRNP1', 'EEF2', 'EGR1', 'EIF3L', 'EIF4A2', 'FGFR4', 'FOS', 'FOSB', 'GAPDH', 'GREM1', 'HES1', 'HEY1', 'HSP90AB1', 'JUN', 'JUNB', 'KLF10', 'MAFF', 'MSC', 'MYC', 'MYF5', 'MYF6', 'NACA', 'NOTCH3', 'NPM1', 'NPPC', 'NUDT14', 'PAX7', 'PITX2', 'RPL10', 'RPL10A', 'RPL12', 'RPL13', 'RPL15', 'RPL17', 'RPL18', 'RPL21', …
78	GO:BP	GO:0071705	nitrogen compound transport	8.34617e-08	TRUE	"The directed movement of nitrogen-containing compounds into, out of or within a cell, or between cells, by means of some agent such as a transporter or pore." [GOC:mah]	2216	155	50	18123	0.322581	0.0225632	FB3	['GO:0006810']	['APOE', 'BMP4', 'GPM6B', 'HSP90AB1', 'MIDN', 'MYC', 'NACA', 'NPM1', 'RPL10', 'RPL10A', 'RPL12', 'RPL13', 'RPL15', 'RPL17', 'RPL18', 'RPL21', 'RPL23A', 'RPL24', 'RPL26', 'RPL3', 'RPL32', 'RPL34', 'RPL36A', 'RPL4', 'RPL41', 'RPL5', 'RPL6', 'RPL7', 'RPL7A', 'RPL8', 'RPL9', 'RPLP0', 'RPS10', 'RPS18', 'RPS19', 'RPS2', 'RPS27A', 'RPS28', 'RPS3', 'RPS3A', 'RPS4X', 'RPS5', 'RPS6', 'RPS8', 'RPS9', 'RPSA'…
79	GO:BP	GO:0000027	ribosomal large subunit assembly	9.2346e-08	TRUE	"The aggregation, arrangement and bonding together of constituent RNAs and proteins to form the large ribosomal subunit." [GOC:jl]	27	155	8	18123	0.0516129	0.296296	FB3	['GO:0022618', 'GO:0042255', 'GO:0042273']	['RPL10', 'RPL23A', 'RPL24', 'RPL3', 'RPL5', 'RPL6', 'RPLP0', 'RSL24D1']
80	GO:BP	GO:0034645	cellular macromolecule biosynthetic process	1.06415e-07	TRUE	"The chemical reactions and pathways resulting in the formation of a macromolecule, any molecule of high relative molecular mass, the structure of which essentially comprises the multiple repetition of units derived, actually or conceptually, from molecules of low relative molecular mass, carried out by individual cells." [GOC:mah]	5081	155	82	18123	0.529032	0.0161386	FB3	['GO:0009059', 'GO:0044249', 'GO:0044260']	['ADIRF', 'APOE', 'ATF3', 'BMP4', 'BTG1', 'BTG2', 'CDKN1C', 'CHCHD10', 'CIRBP', 'CSRNP1', 'EEF2', 'EGR1', 'EIF3L', 'EIF4A2', 'FGFR4', 'FOS', 'FOSB', 'GAPDH', 'GREM1', 'HES1', 'HEY1', 'HSP90AB1', 'JUN', 'JUNB', 'KLF10', 'MAFF', 'MSC', 'MYC', 'MYF5', 'MYF6', 'NACA', 'NOTCH3', 'NPM1', 'NPPC', 'NUDT14', 'PAX7', 'PITX2', 'RPL10', 'RPL10A', 'RPL12', 'RPL13', 'RPL15', 'RPL17', 'RPL18', 'RPL21', 'RPL23A'…
81	GO:BP	GO:0048513	animal organ development	1.14282e-07	TRUE	"Development of a tissue or tissues that work together to perform a specific function or functions. Development pertains to the process whose specific outcome is the progression of a structure over time, from its formation to the mature structure. Organs are commonly observed as visibly distinct structures, but may also exist as loosely associated clusters of cells that work together to perform a…	3701	92	47	18123	0.51087	0.0126993	FB2	['GO:0048731', 'GO:0048856']	['ADAMTS18', 'ALPL', 'ASPN', 'BGN', 'CCND1', 'COL11A1', 'COL1A1', 'COL1A2', 'COL3A1', 'COL4A1', 'COL5A2', 'COL6A3', 'DKK3', 'EDNRA', 'EDNRB', 'GPC3', 'HES1', 'HEY2', 'HMGN1', 'ID3', 'INHBA', 'KRT16', 'KRT17', 'LAMC3', 'LMO4', 'LUM', 'MAGED1', 'MDK', 'MEF2C', 'MFAP2', 'PALLD', 'PTCH1', 'RAB13', 'RBP4', 'ROBO2', 'SERPINE2', 'SERPINH1', 'SNAI2', 'SOX4', 'SPARC', 'STMN1', 'TAGLN', 'TMEM119', 'TRPS1',…
82	GO:BP	GO:0033036	macromolecule localization	1.39863e-07	TRUE	"Any process in which a macromolecule is transported to, or maintained in, a specific location." [GOC:mah]	3148	155	61	18123	0.393548	0.0193774	FB3	['GO:0051179']	['APOC1', 'APOE', 'BMP4', 'CHCHD10', 'DAG1', 'FABP5', 'FBL', 'GPM6B', 'HSP90AB1', 'MAL', 'MEST', 'MIDN', 'NACA', 'NPM1', 'RAPSN', 'RPL10', 'RPL10A', 'RPL12', 'RPL13', 'RPL15', 'RPL17', 'RPL18', 'RPL21', 'RPL23A', 'RPL24', 'RPL26', 'RPL3', 'RPL32', 'RPL34', 'RPL36A', 'RPL4', 'RPL41', 'RPL5', 'RPL6', 'RPL7', 'RPL7A', 'RPL8', 'RPL9', 'RPLP0', 'RPS10', 'RPS18', 'RPS19', 'RPS2', 'RPS27A', 'RPS28', 'RP…
83	GO:BP	GO:0019222	regulation of metabolic process	1.91719e-07	TRUE	"Any process that modulates the frequency, rate or extent of the chemical reactions and pathways within a cell or an organism." [GOC:go_curators]	7175	155	101	18123	0.651613	0.0140767	FB3	['GO:0008152', 'GO:0050789']	['ADIRF', 'ALDH1A1', 'ANGPTL4', 'APOC1', 'APOE', 'ATF3', 'BMP4', 'BST2', 'BTG1', 'BTG2', 'CCL2', 'CDKN1C', 'CHCHD10', 'CIRBP', 'CLDN5', 'CSRNP1', 'CXCR4', 'DAG1', 'DDIT4', 'EEF2', 'EGR1', 'EIF4A2', 'FABP5', 'FGFR4', 'FOS', 'FOSB', 'GADD45B', 'GAPDH', 'GREM1', 'HES1', 'HEY1', 'HLA-E', 'HSP90AB1', 'IL32', 'JUN', 'JUNB', 'KLF10', 'MAFF', 'MIDN', 'MIR24-2', 'MSC', 'MYC', 'MYF5', 'MYF6', 'NACA', 'NDRG…
84	GO:BP	GO:0008104	protein localization	1.99902e-07	TRUE	"Any process in which a protein is transported to, or maintained in, a specific location." [GOC:ai]	2670	155	55	18123	0.354839	0.0205993	FB3	['GO:0033036']	['APOE', 'BMP4', 'CHCHD10', 'DAG1', 'GPM6B', 'HSP90AB1', 'MAL', 'MIDN', 'NACA', 'NPM1', 'RAPSN', 'RPL10', 'RPL10A', 'RPL12', 'RPL13', 'RPL15', 'RPL17', 'RPL18', 'RPL21', 'RPL23A', 'RPL24', 'RPL26', 'RPL3', 'RPL32', 'RPL34', 'RPL36A', 'RPL4', 'RPL41', 'RPL5', 'RPL6', 'RPL7', 'RPL7A', 'RPL8', 'RPL9', 'RPLP0', 'RPS10', 'RPS18', 'RPS19', 'RPS2', 'RPS27A', 'RPS28', 'RPS3', 'RPS3A', 'RPS4X', 'RPS5', 'R…
85	GO:BP	GO:0022618	ribonucleoprotein complex assembly	2.73533e-07	TRUE	"The aggregation, arrangement and bonding together of proteins and RNA molecules to form a ribonucleoprotein complex." [GOC:jl]	196	155	15	18123	0.0967742	0.0765306	FB3	['GO:0022613', 'GO:0034622', 'GO:0071826']	['EIF3L', 'HSP90AB1', 'RPL10', 'RPL23A', 'RPL24', 'RPL3', 'RPL5', 'RPL6', 'RPLP0', 'RPS10', 'RPS19', 'RPS28', 'RPS5', 'RPSA', 'RSL24D1']
86	GO:BP	GO:0072359	circulatory system development	3.49003e-07	TRUE	"The process whose specific outcome is the progression of the circulatory system over time, from its formation to the mature structure. The circulatory system is the organ system that passes nutrients (such as amino acids and electrolytes), gases, hormones, blood cells, etc. to and from cells in the body to help fight diseases and help stabilize body temperature and pH to maintain homeostasis." […	1215	92	26	18123	0.282609	0.0213992	FB2	['GO:0048731']	['CALD1', 'COL11A1', 'COL1A1', 'COL1A2', 'COL3A1', 'COL4A1', 'COL4A2', 'CREB3L1', 'EDNRA', 'ENPP2', 'GPC3', 'HES1', 'HEY2', 'ID3', 'LMO4', 'MDK', 'MEF2C', 'PLK2', 'PTCH1', 'RBP4', 'ROBO2', 'SNAI2', 'SOX4', 'SPARC', 'TNMD', 'WNT5A']
87	GO:BP	GO:0071826	ribonucleoprotein complex subunit organization	4.48583e-07	TRUE	"Any process in which macromolecules aggregate, disaggregate, or are modified, resulting in the formation, disassembly, or alteration of a ribonucleoprotein complex." [GOC:mah]	203	155	15	18123	0.0967742	0.0738916	FB3	['GO:0043933']	['EIF3L', 'HSP90AB1', 'RPL10', 'RPL23A', 'RPL24', 'RPL3', 'RPL5', 'RPL6', 'RPLP0', 'RPS10', 'RPS19', 'RPS28', 'RPS5', 'RPSA', 'RSL24D1']
88	GO:BP	GO:0060538	skeletal muscle organ development	4.74261e-07	TRUE	"The progression of a skeletal muscle organ over time from its initial formation to its mature state. A skeletal muscle organ includes the skeletal muscle tissue and its associated connective tissue." [GOC:dph]	171	155	14	18123	0.0903226	0.0818713	FB3	['GO:0007517']	['ATF3', 'BTG2', 'CHRNA1', 'DAG1', 'EEF2', 'EGR1', 'FOS', 'KLHL41', 'MAFF', 'MSC', 'MYF5', 'MYF6', 'NACA', 'STAC3']
89	GO:BP	GO:0071702	organic substance transport	5.38269e-07	TRUE	"The directed movement of organic substances into, out of or within a cell, or between cells, or within a multicellular organism by means of some agent such as a transporter or pore. An organic substance is a molecular entity that contains carbon." [GOC:mah]	2657	155	54	18123	0.348387	0.0203237	FB3	['GO:0006810']	['APOC1', 'APOE', 'BMP4', 'CA3', 'FABP5', 'GPM6B', 'HSP90AB1', 'MIDN', 'MYC', 'NACA', 'NPM1', 'RPL10', 'RPL10A', 'RPL12', 'RPL13', 'RPL15', 'RPL17', 'RPL18', 'RPL21', 'RPL23A', 'RPL24', 'RPL26', 'RPL3', 'RPL32', 'RPL34', 'RPL36A', 'RPL4', 'RPL41', 'RPL5', 'RPL6', 'RPL7', 'RPL7A', 'RPL8', 'RPL9', 'RPLP0', 'RPS10', 'RPS18', 'RPS19', 'RPS2', 'RPS27A', 'RPS28', 'RPS3', 'RPS3A', 'RPS4X', 'RPS5', 'RPS6…
90	GO:BP	GO:0009653	anatomical structure morphogenesis	5.73747e-07	TRUE	"The process in which anatomical structures are generated and organized. Morphogenesis pertains to the creation of form." [GOC:go_curators, ISBN:0521436125]	2816	168	59	18123	0.35119	0.0209517	FB1	['GO:0032502', 'GO:0048856']	['ACKR3', 'ADM', 'ANGPTL1', 'ANGPTL2', 'ANK2', 'APOD', 'AXL', 'C3', 'CD248', 'CD34', 'CD81', 'CLU', 'COL12A1', 'CRIP1', 'CST3', 'CTHRC1', 'CXCL12', 'DBN1', 'DCN', 'ECM1', 'EFEMP1', 'ELN', 'FBLN1', 'FBN1', 'GAS7', 'GFRA1', 'GPNMB', 'HSPG2', 'IGFBP5', 'ITGB1BP1', 'LEPR', 'LRP1', 'LY6E', 'MGP', 'MMP2', 'NBL1', 'NTN4', 'OSR2', 'PAM', 'PDGFRB', 'PMP22', 'PTGIS', 'RAMP2', 'RBPJ', 'RNH1', 'S100A13', 'S1…
91	GO:BP	GO:0072359	circulatory system development	7.05526e-07	TRUE	"The process whose specific outcome is the progression of the circulatory system over time, from its formation to the mature structure. The circulatory system is the organ system that passes nutrients (such as amino acids and electrolytes), gases, hormones, blood cells, etc. to and from cells in the body to help fight diseases and help stabilize body temperature and pH to maintain homeostasis." […	1215	168	36	18123	0.214286	0.0296296	FB1	['GO:0048731']	['ABI3BP', 'ACKR3', 'ADM', 'ANGPTL1', 'ANGPTL2', 'ANK2', 'APOD', 'C3', 'CD34', 'CRIP1', 'DCN', 'ECM1', 'ELN', 'FBN1', 'GPNMB', 'HSPG2', 'ITGB1BP1', 'LEPR', 'LRP1', 'LY6E', 'MMP2', 'PAM', 'PDGFD', 'PDGFRB', 'PI16', 'PTGIS', 'RAMP2', 'RBPJ', 'RNH1', 'SEMA3C', 'SERPINF1', 'SFRP2', 'SLIT3', 'TGFBR3', 'THBS2', 'TNFAIP2']
92	GO:BP	GO:0032501	multicellular organismal process	8.00107e-07	TRUE	"Any biological process, occurring at the level of a multicellular organism, pertinent to its function." [GOC:curators, GOC:dph, GOC:isa_complete, GOC:tb]	8000	92	70	18123	0.76087	0.00875	FB2	['GO:0008150']	['ADAMTS18', 'ALPL', 'ASPN', 'BGN', 'CALD1', 'CCND1', 'CDH11', 'CLEC11A', 'COL11A1', 'COL1A1', 'COL1A2', 'COL3A1', 'COL4A1', 'COL4A2', 'COL5A2', 'COL6A1', 'COL6A3', 'CREB3L1', 'DKK3', 'EDNRA', 'EDNRB', 'ENPP2', 'F2R', 'F2RL2', 'GPC3', 'HAPLN1', 'HES1', 'HEY2', 'HMGN1', 'ID3', 'INHBA', 'KRT16', 'KRT17', 'LAMC3', 'LMO4', 'LUM', 'MAGED1', 'MARCKSL1', 'MDK', 'MEF2C', 'MFAP2', 'MYL4', 'NAP1L1', 'NOTCH…
93	GO:BP	GO:0051649	establishment of localization in cell	9.13989e-07	TRUE	"Any process, occuring in a cell, that localizes a substance or cellular component. This may occur via movement, tethering or selective degradation." [GOC:ai, GOC:dos, GOC:dph, GOC:tb]	2778	155	55	18123	0.354839	0.0197984	FB3	['GO:0051234', 'GO:0051641']	['ALDOA', 'APOE', 'BMP4', 'BST2', 'EEF2', 'FABP5', 'GPM6B', 'HSP90AB1', 'IMPDH2', 'JSRP1', 'NACA', 'NPM1', 'RPL10', 'RPL10A', 'RPL12', 'RPL13', 'RPL15', 'RPL17', 'RPL18', 'RPL21', 'RPL23A', 'RPL24', 'RPL26', 'RPL3', 'RPL32', 'RPL34', 'RPL36A', 'RPL4', 'RPL41', 'RPL5', 'RPL6', 'RPL7', 'RPL7A', 'RPL8', 'RPL9', 'RPLP0', 'RPS10', 'RPS18', 'RPS19', 'RPS2', 'RPS27A', 'RPS28', 'RPS3', 'RPS3A', 'RPS4X', …
94	GO:BP	GO:0051093	negative regulation of developmental process	9.20298e-07	TRUE	"Any process that stops, prevents or reduces the rate or extent of development, the biological process whose specific outcome is the progression of an organism over time from an initial condition (e.g. a zygote, or a young adult) to a later condition (e.g. a multicellular animal or an aged adult)." [GOC:ai]	984	92	23	18123	0.25	0.023374	FB2	['GO:0032502', 'GO:0048519', 'GO:0050793']	['ASPN', 'CCND1', 'COL4A2', 'COL5A2', 'CREB3L1', 'EDNRB', 'HES1', 'HEY2', 'ID3', 'INHBA', 'MDK', 'PLK2', 'POSTN', 'PTCH1', 'RBP4', 'ROBO2', 'SNAI2', 'SPARC', 'TMEM119', 'TNMD', 'TNN', 'WNT5A', 'WWTR1']
95	GO:BP	GO:0044248	cellular catabolic process	1.08524e-06	TRUE	"The chemical reactions and pathways resulting in the breakdown of substances, carried out by individual cells." [GOC:jl]	2381	155	50	18123	0.322581	0.0209996	FB3	['GO:0009056', 'GO:0044237']	['APOC1', 'APOE', 'BTG2', 'CIRBP', 'FABP5', 'GAPDH', 'HSP90AB1', 'MYC', 'NPM1', 'PON2', 'RPL10', 'RPL10A', 'RPL12', 'RPL13', 'RPL15', 'RPL17', 'RPL18', 'RPL21', 'RPL23A', 'RPL24', 'RPL26', 'RPL3', 'RPL32', 'RPL34', 'RPL36A', 'RPL4', 'RPL41', 'RPL5', 'RPL6', 'RPL7', 'RPL7A', 'RPL8', 'RPL9', 'RPLP0', 'RPS10', 'RPS18', 'RPS19', 'RPS2', 'RPS27A', 'RPS28', 'RPS3', 'RPS3A', 'RPS4X', 'RPS5', 'RPS6', 'RP…
96	GO:BP	GO:0048856	anatomical structure development	1.16317e-06	TRUE	"The biological process whose specific outcome is the progression of an anatomical structure from an initial condition to its mature state. This process begins with the formation of the structure and ends with the mature structure, whatever form that may be including its natural destruction. An anatomical structure is any biological entity that occupies space and is distinguished from its surroun…	6164	168	96	18123	0.571429	0.0155743	FB1	['GO:0032502']	['ABI3BP', 'ACKR3', 'ADM', 'AKR1C1', 'AKR1C2', 'AKR1C3', 'ANGPTL1', 'ANGPTL2', 'ANK2', 'APOD', 'AXL', 'C3', 'CD248', 'CD34', 'CD81', 'CHRDL1', 'CLDN11', 'CLEC3B', 'CLU', 'COL12A1', 'CRIP1', 'CST3', 'CTHRC1', 'CTSK', 'CXCL12', 'DBN1', 'DCN', 'EBF1', 'ECM1', 'EFEMP1', 'ELN', 'FBLN1', 'FBN1', 'FSTL1', 'GAS7', 'GFRA1', 'GPNMB', 'GPX4', 'GSN', 'HSPG2', 'IGFBP5', 'IGFBP7', 'IL6ST', 'ITGB1BP1', 'ITM2A',…
97	GO:BP	GO:0032502	developmental process	1.29035e-06	TRUE	"A biological process whose specific outcome is the progression of an integrated living unit: an anatomical structure (which may be a subcellular structure, cell, tissue, or organ), or organism over time from an initial condition to a later condition." [GOC:isa_complete]	6678	168	101	18123	0.60119	0.0151243	FB1	['GO:0008150']	['ABI3BP', 'ACKR3', 'ADM', 'AKR1C1', 'AKR1C2', 'AKR1C3', 'ANGPTL1', 'ANGPTL2', 'ANK2', 'APOD', 'AXL', 'C3', 'CD248', 'CD34', 'CD81', 'CHRDL1', 'CLDN11', 'CLEC3B', 'CLU', 'COL12A1', 'CRIP1', 'CST3', 'CTHRC1', 'CTSK', 'CXCL12', 'DBN1', 'DCN', 'EBF1', 'ECM1', 'EFEMP1', 'ELN', 'FBLN1', 'FBN1', 'FSTL1', 'GAS1', 'GAS7', 'GFRA1', 'GPNMB', 'GPX4', 'GSN', 'HSPG2', 'IGFBP5', 'IGFBP7', 'IL6ST', 'ITGB1BP1', …
98	GO:BP	GO:0009058	biosynthetic process	1.47578e-06	TRUE	"The chemical reactions and pathways resulting in the formation of substances; typically the energy-requiring part of metabolism in which simpler substances are transformed into more complex ones." [GOC:curators, ISBN:0198547684]	6391	155	92	18123	0.593548	0.0143952	FB3	['GO:0008152']	['ADIRF', 'ALDOA', 'APOC1', 'APOE', 'ATF3', 'BMP4', 'BTG1', 'BTG2', 'CCL2', 'CDKN1C', 'CHCHD10', 'CIRBP', 'CSRNP1', 'EEF2', 'EGR1', 'EIF3L', 'EIF4A2', 'FABP5', 'FGFR4', 'FOS', 'FOSB', 'GAPDH', 'GREM1', 'HES1', 'HEY1', 'HSP90AB1', 'IMPDH2', 'JUN', 'JUNB', 'KLF10', 'MAFF', 'MAT2A', 'MIR24-2', 'MSC', 'MYC', 'MYF5', 'MYF6', 'NACA', 'NOTCH3', 'NPM1', 'NPPC', 'NUDT14', 'PAX7', 'PDK4', 'PITX2', 'RBP1', …
99	GO:BP	GO:0010033	response to organic substance	1.59615e-06	TRUE	"Any process that results in a change in state or activity of a cell or an organism (in terms of movement, secretion, enzyme production, gene expression, etc.) as a result of an organic substance stimulus." [GOC:sm, PMID:23356676]	3457	168	66	18123	0.392857	0.0190917	FB1	['GO:0042221']	['ACKR3', 'ACKR4', 'ADM', 'AKAP12', 'AKR1C1', 'AKR1C2', 'AKR1C3', 'ANK2', 'AXL', 'CD55', 'CD81', 'CHRDL1', 'CLEC3B', 'CLU', 'CRIP1', 'CXCL12', 'DCN', 'ECM1', 'EPHX1', 'FBN1', 'FIBIN', 'FSTL1', 'GAS1', 'GPX3', 'GPX4', 'GSN', 'IGFBP5', 'IGFBP7', 'IL6ST', 'ITGB1BP1', 'JUND', 'LEPR', 'LEPROT', 'LRP1', 'LTBP2', 'LTBP4', 'LY6E', 'MAN1A1', 'MGST1', 'MMP2', 'NBL1', 'PAM', 'PCOLCE2', 'PDGFD', 'PDGFRB', 'P…
100	GO:BP	GO:0060255	regulation of macromolecule metabolic process	1.6431e-06	TRUE	"Any process that modulates the frequency, rate or extent of the chemical reactions and pathways involving macromolecules, any molecule of high relative molecular mass, the structure of which essentially comprises the multiple repetition of units derived, actually or conceptually, from molecules of low relative molecular mass." [GOC:dph, GOC:tb]	6622	155	94	18123	0.606452	0.0141951	FB3	['GO:0019222', 'GO:0043170']	['ADIRF', 'APOE', 'ATF3', 'BMP4', 'BST2', 'BTG1', 'BTG2', 'CCL2', 'CDKN1C', 'CHCHD10', 'CIRBP', 'CLDN5', 'CSRNP1', 'CXCR4', 'DAG1', 'DDIT4', 'EEF2', 'EGR1', 'EIF4A2', 'FGFR4', 'FOS', 'FOSB', 'GADD45B', 'GAPDH', 'GREM1', 'HES1', 'HEY1', 'HLA-E', 'HSP90AB1', 'IL32', 'JUN', 'JUNB', 'KLF10', 'MAFF', 'MIR24-2', 'MSC', 'MYC', 'MYF5', 'MYF6', 'NACA', 'NDRG2', 'NOTCH3', 'NPM1', 'NPPC', 'PAX7', 'PITX2', '…
101	GO:BP	GO:1901576	organic substance biosynthetic process	1.68989e-06	TRUE	"The chemical reactions and pathways resulting in the formation of an organic substance, any molecular entity containing carbon." [GOC:pr, GOC:TermGenie]	6297	155	91	18123	0.587097	0.0144513	FB3	['GO:0009058', 'GO:0071704']	['ADIRF', 'ALDOA', 'APOC1', 'APOE', 'ATF3', 'BMP4', 'BTG1', 'BTG2', 'CCL2', 'CDKN1C', 'CHCHD10', 'CIRBP', 'CSRNP1', 'EEF2', 'EGR1', 'EIF3L', 'EIF4A2', 'FABP5', 'FGFR4', 'FOS', 'FOSB', 'GAPDH', 'GREM1', 'HES1', 'HEY1', 'HSP90AB1', 'IMPDH2', 'JUN', 'JUNB', 'KLF10', 'MAFF', 'MAT2A', 'MSC', 'MYC', 'MYF5', 'MYF6', 'NACA', 'NOTCH3', 'NPM1', 'NPPC', 'NUDT14', 'PAX7', 'PDK4', 'PITX2', 'RBP1', 'RPL10', 'R…
102	GO:BP	GO:0010467	gene expression	1.73784e-06	TRUE	"The process in which a gene's sequence is converted into a mature gene product or products (proteins or RNA). This includes the production of an RNA transcript as well as any processing to produce a mature RNA product or an mRNA or circRNA (for protein-coding genes) and the translation of that mRNA or circRNA into protein. Protein maturation is included when required to form an active form of a …	6192	155	90	18123	0.580645	0.0145349	FB3	['GO:0043170']	['ADIRF', 'APOE', 'ATF3', 'BMP4', 'BST2', 'BTG1', 'BTG2', 'CDKN1C', 'CHCHD10', 'CIRBP', 'CLDN5', 'CSRNP1', 'EEF2', 'EGR1', 'EIF3L', 'EIF4A2', 'FBL', 'FGFR4', 'FOS', 'FOSB', 'GAPDH', 'GREM1', 'HES1', 'HEY1', 'HLA-E', 'HSP90AB1', 'IL32', 'JUN', 'JUNB', 'KLF10', 'MAFF', 'MIR24-2', 'MSC', 'MYC', 'MYF5', 'MYF6', 'NACA', 'NDRG2', 'NOTCH3', 'NPM1', 'PAX7', 'PITX2', 'RPL10', 'RPL10A', 'RPL12', 'RPL13', '…
103	GO:BP	GO:0048646	anatomical structure formation involved in morphogenesis	1.74983e-06	TRUE	"The developmental process pertaining to the initial formation of an anatomical structure from unspecified parts. This process begins with the specific processes that contribute to the appearance of the discrete structure and ends when the structural rudiment is recognizable. An anatomical structure is any biological entity that occupies space and is distinguished from its surroundings. Anatomica…	1209	92	25	18123	0.271739	0.0206782	FB2	['GO:0009653', 'GO:0032502']	['CALD1', 'COL11A1', 'COL1A1', 'COL4A1', 'COL4A2', 'COL5A2', 'COL6A1', 'CREB3L1', 'EDNRA', 'ENPP2', 'HES1', 'HEY2', 'INHBA', 'LMO4', 'MDK', 'MEF2C', 'PLK2', 'PTCH1', 'RBP4', 'ROBO2', 'SNAI2', 'SOX4', 'SPARC', 'TNMD', 'WNT5A']
104	GO:BP	GO:0044249	cellular biosynthetic process	2.05416e-06	TRUE	"The chemical reactions and pathways resulting in the formation of substances, carried out by individual cells." [GOC:jl]	6210	155	90	18123	0.580645	0.0144928	FB3	['GO:0009058', 'GO:0044237']	['ADIRF', 'ALDOA', 'APOC1', 'APOE', 'ATF3', 'BMP4', 'BTG1', 'BTG2', 'CDKN1C', 'CHCHD10', 'CIRBP', 'CSRNP1', 'EEF2', 'EGR1', 'EIF3L', 'EIF4A2', 'FABP5', 'FGFR4', 'FOS', 'FOSB', 'GAPDH', 'GREM1', 'HES1', 'HEY1', 'HSP90AB1', 'IMPDH2', 'JUN', 'JUNB', 'KLF10', 'MAFF', 'MAT2A', 'MSC', 'MYC', 'MYF5', 'MYF6', 'NACA', 'NOTCH3', 'NPM1', 'NPPC', 'NUDT14', 'PAX7', 'PDK4', 'PITX2', 'RBP1', 'RPL10', 'RPL10A', …
105	GO:BP	GO:0007519	skeletal muscle tissue development	2.34659e-06	TRUE	"The developmental sequence of events leading to the formation of adult skeletal muscle tissue. The main events are: the fusion of myoblasts to form myotubes that increase in size by further fusion to them of myoblasts, the formation of myofibrils within their cytoplasm and the establishment of functional neuromuscular junctions with motor neurons. At this stage they can be regarded as mature mus…	160	155	13	18123	0.083871	0.08125	FB3	['GO:0014706', 'GO:0060538']	['ATF3', 'BTG2', 'CHRNA1', 'EEF2', 'EGR1', 'FOS', 'KLHL41', 'MAFF', 'MSC', 'MYF5', 'MYF6', 'NACA', 'STAC3']
106	GO:BP	GO:0060429	epithelium development	2.77206e-06	TRUE	"The process whose specific outcome is the progression of an epithelium over time, from its formation to the mature structure. An epithelium is a tissue that covers the internal or external surfaces of an anatomical structure." [GOC:dph, GOC:mtg_lung]	1338	92	26	18123	0.282609	0.019432	FB2	['GO:0009888']	['CCND1', 'COL4A1', 'EDNRA', 'GPC3', 'HES1', 'HEY2', 'ID3', 'INHBA', 'KRT16', 'KRT17', 'LMO4', 'MAGED1', 'MDK', 'MEF2C', 'PALLD', 'PTCH1', 'RAB13', 'ROBO2', 'SERPINE2', 'SNAI2', 'SOX4', 'TAGLN', 'TNMD', 'VIM', 'WNT5A', 'WWTR1']
107	GO:BP	GO:0007275	multicellular organism development	2.90976e-06	TRUE	"The biological process whose specific outcome is the progression of a multicellular organism over time from an initial condition (e.g. a zygote or a young adult) to a later condition (e.g. a multicellular animal or an aged adult)." [GOC:dph, GOC:ems, GOC:isa_complete, GOC:tb]	5670	168	90	18123	0.535714	0.015873	FB1	['GO:0032501', 'GO:0048856']	['ABI3BP', 'ACKR3', 'ADM', 'AKR1C3', 'ANGPTL1', 'ANGPTL2', 'ANK2', 'APOD', 'AXL', 'C3', 'CD248', 'CD34', 'CD81', 'CHRDL1', 'CLDN11', 'CLEC3B', 'CLU', 'COL12A1', 'CRIP1', 'CTHRC1', 'CTSK', 'CXCL12', 'DBN1', 'DCN', 'EBF1', 'ECM1', 'EFEMP1', 'ELN', 'FBLN1', 'FBN1', 'FSTL1', 'GAS7', 'GFRA1', 'GPNMB', 'GPX4', 'GSN', 'HSPG2', 'IGFBP5', 'IGFBP7', 'IL6ST', 'ITGB1BP1', 'ITM2A', 'ITM2B', 'LEPR', 'LGALS3', …
108	GO:BP	GO:0042221	response to chemical	3.11779e-06	TRUE	"Any process that results in a change in state or activity of a cell or an organism (in terms of movement, secretion, enzyme production, gene expression, etc.) as a result of a chemical stimulus." [GOC:jl]	4829	168	81	18123	0.482143	0.0167737	FB1	['GO:0050896']	['ACKR3', 'ACKR4', 'ADM', 'AKAP12', 'AKR1C1', 'AKR1C2', 'AKR1C3', 'ANK2', 'APOD', 'AXL', 'CD34', 'CD55', 'CD81', 'CHRDL1', 'CLEC3B', 'CLU', 'CRIP1', 'CXCL12', 'CYB5R3', 'CYBRD1', 'DCN', 'ECM1', 'EPHX1', 'FBLN5', 'FBN1', 'FIBIN', 'FSTL1', 'GAS1', 'GFRA1', 'GPNMB', 'GPX3', 'GPX4', 'GSN', 'HSD3B7', 'IGFBP5', 'IGFBP7', 'IL6ST', 'ITGB1BP1', 'JUND', 'LEPR', 'LEPROT', 'LGALS3', 'LRP1', 'LTBP2', 'LTBP4',…
109	GO:BP	GO:0016070	RNA metabolic process	3.3428e-06	TRUE	"The cellular chemical reactions and pathways involving RNA, ribonucleic acid, one of the two main type of nucleic acid, consisting of a long, unbranched macromolecule formed from ribonucleotides joined in 3',5'-phosphodiester linkage." [ISBN:0198506732]	4714	155	75	18123	0.483871	0.0159101	FB3	['GO:0090304']	['ADIRF', 'APOE', 'ATF3', 'BMP4', 'BTG1', 'BTG2', 'CDKN1C', 'CHCHD10', 'CIRBP', 'CSRNP1', 'EGR1', 'EIF4A2', 'FBL', 'FOS', 'FOSB', 'GREM1', 'HES1', 'HEY1', 'JUN', 'JUNB', 'KLF10', 'MAFF', 'MSC', 'MYC', 'MYF5', 'MYF6', 'NACA', 'NOTCH3', 'NPM1', 'PAX7', 'PITX2', 'RPL10', 'RPL10A', 'RPL12', 'RPL13', 'RPL15', 'RPL17', 'RPL18', 'RPL21', 'RPL23A', 'RPL24', 'RPL26', 'RPL3', 'RPL32', 'RPL34', 'RPL36A', 'R…
110	GO:BP	GO:0035295	tube development	3.95722e-06	TRUE	"The process whose specific outcome is the progression of a tube over time, from its initial formation to a mature structure. Epithelial and endothelial tubes transport gases, liquids and cells from one site to another and form the basic structure of many organs and tissues including lung and trachea, kidney, the mammary gland, the vascular system and the gastrointestinal and urinary-genital trac…	1158	92	24	18123	0.26087	0.0207254	FB2	['GO:0007275', 'GO:0048856']	['CALD1', 'COL4A1', 'COL4A2', 'CREB3L1', 'EDNRA', 'EDNRB', 'ENPP2', 'GPC3', 'HES1', 'HEY2', 'LMO4', 'MAGED1', 'MDK', 'MEF2C', 'PLK2', 'PTCH1', 'RBP4', 'ROBO2', 'SERPINE2', 'SOX4', 'SPARC', 'TNMD', 'WNT5A', 'WWTR1']
111	GO:BP	GO:0051239	regulation of multicellular organismal process	4.54888e-06	TRUE	"Any process that modulates the frequency, rate or extent of a multicellular organismal process, the processes pertinent to the function of a multicellular organism above the cellular level; includes the integrated processes of tissues and organs." [GOC:ai, GOC:dph, GOC:tb]	2888	168	58	18123	0.345238	0.0200831	FB1	['GO:0032501', 'GO:0050789']	['ABI3BP', 'ADM', 'AKAP12', 'ANK2', 'APOD', 'AXL', 'C3', 'CD34', 'CD55', 'CD81', 'CLU', 'CST3', 'CTSK', 'CXCL12', 'DBN1', 'DCN', 'ECM1', 'EFEMP1', 'FBLN1', 'FBN1', 'GPNMB', 'HSPG2', 'IGFBP5', 'IL6ST', 'ITGB1BP1', 'LEPR', 'LGALS3', 'LRP1', 'MGP', 'NOVA1', 'NTN4', 'NUPR1', 'OMD', 'OSR2', 'PI16', 'POLR2L', 'PTGES', 'PTGIS', 'RAMP2', 'RBPJ', 'RNH1', 'S100A13', 'SDCBP', 'SEMA3C', 'SERPINF1', 'SERPING1…
112	GO:BP	GO:0051641	cellular localization	4.76362e-06	TRUE	"A cellular localization process whereby a substance or cellular entity, such as a protein complex or organelle, is transported to, and/or maintained in, a specific location within a cell including the localization of substances or cellular entities to the cell membrane." [GOC:tb, GOC:vw]	3519	155	62	18123	0.4	0.0176186	FB3	['GO:0009987', 'GO:0051179']	['ALDOA', 'APOE', 'BMP4', 'BST2', 'CHCHD10', 'DAG1', 'EEF2', 'FABP5', 'GPM6B', 'HSP90AB1', 'IMPDH2', 'JSRP1', 'MAL', 'NACA', 'NPM1', 'RAPSN', 'RPL10', 'RPL10A', 'RPL12', 'RPL13', 'RPL15', 'RPL17', 'RPL18', 'RPL21', 'RPL23A', 'RPL24', 'RPL26', 'RPL3', 'RPL32', 'RPL34', 'RPL36A', 'RPL4', 'RPL41', 'RPL5', 'RPL6', 'RPL7', 'RPL7A', 'RPL8', 'RPL9', 'RPLP0', 'RPS10', 'RPS18', 'RPS19', 'RPS2', 'RPS27A', …
113	GO:BP	GO:0001649	osteoblast differentiation	4.76968e-06	TRUE	"The process whereby a relatively unspecialized cell acquires the specialized features of an osteoblast, a mesodermal or neural crest cell that gives rise to bone." [CL:0000062, GO_REF:0000034, GOC:jid]	235	92	12	18123	0.130435	0.0510638	FB2	['GO:0001503', 'GO:0030154']	['ALPL', 'COL1A1', 'COL6A1', 'CREB3L1', 'ID3', 'MEF2C', 'PTCH1', 'SNAI2', 'TMEM119', 'TNN', 'VCAN', 'WWTR1']
114	GO:BP	GO:0032501	multicellular organismal process	5.50696e-06	TRUE	"Any biological process, occurring at the level of a multicellular organism, pertinent to its function." [GOC:curators, GOC:dph, GOC:isa_complete, GOC:tb]	8000	168	112	18123	0.666667	0.014	FB1	['GO:0008150']	['ABI3BP', 'ACKR3', 'ADM', 'AKAP12', 'AKR1C1', 'AKR1C2', 'AKR1C3', 'ANGPTL1', 'ANGPTL2', 'ANK2', 'APOD', 'AXL', 'C3', 'CD248', 'CD34', 'CD55', 'CD81', 'CHRDL1', 'CLDN11', 'CLEC3B', 'CLU', 'COL12A1', 'CRIP1', 'CST3', 'CTHRC1', 'CTSK', 'CXCL12', 'CYB5R3', 'DBN1', 'DCN', 'EBF1', 'ECM1', 'EFEMP1', 'ELN', 'ENTPD1', 'FBLN1', 'FBN1', 'FSTL1', 'GAS7', 'GFRA1', 'GPNMB', 'GPX4', 'GSN', 'HSPG2', 'IGFBP5', '…
115	GO:BP	GO:0001525	angiogenesis	6.10657e-06	TRUE	"Blood vessel formation when new vessels emerge from the proliferation of pre-existing blood vessels." [ISBN:0878932453]	621	168	24	18123	0.142857	0.0386473	FB1	['GO:0048514', 'GO:0048646']	['ACKR3', 'ADM', 'ANGPTL1', 'ANGPTL2', 'APOD', 'C3', 'CD34', 'DCN', 'ECM1', 'GPNMB', 'HSPG2', 'ITGB1BP1', 'LEPR', 'MMP2', 'PDGFRB', 'PTGIS', 'RAMP2', 'RBPJ', 'RNH1', 'SERPINF1', 'SFRP2', 'TGFBR3', 'THBS2', 'TNFAIP2']
116	GO:BP	GO:0048869	cellular developmental process	6.69858e-06	TRUE	"A biological process whose specific outcome is the progression of a cell over time from an initial condition to a later condition." [GOC:isa_complete]	4468	92	49	18123	0.532609	0.0109669	FB2	['GO:0009987', 'GO:0032502']	['ALPL', 'CCND1', 'CDH11', 'COL11A1', 'COL1A1', 'COL3A1', 'COL4A1', 'COL4A2', 'COL5A2', 'COL6A1', 'CREB3L1', 'EDNRA', 'EDNRB', 'ENPP2', 'GPC3', 'HES1', 'HEY2', 'ID3', 'INHBA', 'KRT16', 'KRT17', 'LAMC3', 'LMO4', 'MDK', 'MEF2C', 'NAP1L1', 'NOTCH3', 'NPM1', 'PALLD', 'PLK2', 'POSTN', 'PTCH1', 'RAB13', 'ROBO2', 'SERPINE2', 'SERPINH1', 'SNAI2', 'SOX4', 'STMN1', 'STMN2', 'TAGLN', 'TMEM119', 'TNMD', 'TNN…
117	GO:BP	GO:0009719	response to endogenous stimulus	7.09116e-06	TRUE	"Any process that results in a change in state or activity of a cell or an organism (in terms of movement, secretion, enzyme production, gene expression, etc.) as a result of a stimulus arising within the organism." [GOC:sm]	1729	92	29	18123	0.315217	0.0167727	FB2	['GO:0050896']	['ALPL', 'ASPN', 'CCND1', 'COL1A1', 'COL1A2', 'COL3A1', 'COL4A1', 'COL4A2', 'COL5A2', 'COL6A1', 'CREB3L1', 'DKK3', 'EDNRB', 'GPC3', 'HES1', 'HNRNPA1', 'INHBA', 'MDK', 'MEF2C', 'MXRA5', 'POSTN', 'RAB13', 'ROBO2', 'SNAI2', 'SPARC', 'STMN2', 'TNMD', 'VIM', 'WNT5A']
118	GO:BP	GO:0009056	catabolic process	8.58222e-06	TRUE	"The chemical reactions and pathways resulting in the breakdown of substances, including the breakdown of carbon compounds with the liberation of energy for use by the cell or organism." [ISBN:0198547684]	2779	155	53	18123	0.341935	0.0190716	FB3	['GO:0008152']	['ALDH1A1', 'ALDOA', 'APOC1', 'APOE', 'BTG2', 'CIRBP', 'DDIT4', 'FABP5', 'GAPDH', 'HSP90AB1', 'MYC', 'NPM1', 'PON2', 'RPL10', 'RPL10A', 'RPL12', 'RPL13', 'RPL15', 'RPL17', 'RPL18', 'RPL21', 'RPL23A', 'RPL24', 'RPL26', 'RPL3', 'RPL32', 'RPL34', 'RPL36A', 'RPL4', 'RPL41', 'RPL5', 'RPL6', 'RPL7', 'RPL7A', 'RPL8', 'RPL9', 'RPLP0', 'RPS10', 'RPS18', 'RPS19', 'RPS2', 'RPS27A', 'RPS28', 'RPS3', 'RPS3A',…
119	GO:BP	GO:0001568	blood vessel development	9.76276e-06	TRUE	"The process whose specific outcome is the progression of a blood vessel over time, from its formation to the mature structure. The blood vessel is the vasculature carrying blood." [GOC:hjd, UBERON:0001981]	797	168	27	18123	0.160714	0.033877	FB1	['GO:0001944', 'GO:0048856']	['ACKR3', 'ADM', 'ANGPTL1', 'ANGPTL2', 'APOD', 'C3', 'CD34', 'DCN', 'ECM1', 'GPNMB', 'HSPG2', 'ITGB1BP1', 'LEPR', 'LRP1', 'MMP2', 'PDGFD', 'PDGFRB', 'PTGIS', 'RAMP2', 'RBPJ', 'RNH1', 'SEMA3C', 'SERPINF1', 'SFRP2', 'TGFBR3', 'THBS2', 'TNFAIP2']
120	GO:BP	GO:0050793	regulation of developmental process	1.00668e-05	TRUE	"Any process that modulates the frequency, rate or extent of development, the biological process whose specific outcome is the progression of a multicellular organism over time from an initial condition (e.g. a zygote, or a young adult) to a later condition (e.g. a multicellular animal or an aged adult)." [GOC:go_curators]	2621	92	36	18123	0.391304	0.0137352	FB2	['GO:0032502', 'GO:0050789']	['ASPN', 'CCND1', 'COL1A1', 'COL4A2', 'COL5A2', 'CREB3L1', 'EDNRB', 'ENPP2', 'GPC3', 'HES1', 'HEY2', 'HMGN1', 'ID3', 'INHBA', 'KRT17', 'LMO4', 'MAGED1', 'MDK', 'MEF2C', 'NAP1L1', 'NOTCH3', 'PLK2', 'POSTN', 'PTCH1', 'RBP4', 'ROBO2', 'SERPINE2', 'SNAI2', 'SOX4', 'SPARC', 'TMEM119', 'TNMD', 'TNN', 'TRPS1', 'WNT5A', 'WWTR1']
121	GO:BP	GO:0006139	nucleobase-containing compound metabolic process	1.07887e-05	TRUE	"Any cellular metabolic process involving nucleobases, nucleosides, nucleotides and nucleic acids." [GOC:ai]	5752	155	84	18123	0.541935	0.0146036	FB3	['GO:0006725', 'GO:0034641', 'GO:0044238', 'GO:0046483', 'GO:1901360']	['ADIRF', 'ALDOA', 'APOE', 'ATF3', 'BMP4', 'BTG1', 'BTG2', 'CDKN1C', 'CHCHD10', 'CIRBP', 'CSRNP1', 'DDIT4', 'EGR1', 'EIF4A2', 'FBL', 'FGFR4', 'FOS', 'FOSB', 'GAPDH', 'GREM1', 'HES1', 'HEY1', 'HSP90AB1', 'IMPDH2', 'JUN', 'JUNB', 'KLF10', 'MAFF', 'MSC', 'MYC', 'MYF5', 'MYF6', 'NACA', 'NOTCH3', 'NPM1', 'NPPC', 'NUDT14', 'PAX7', 'PDK4', 'PITX2', 'RPL10', 'RPL10A', 'RPL12', 'RPL13', 'RPL15', 'RPL17', …
122	GO:BP	GO:0032940	secretion by cell	1.21218e-05	TRUE	"The controlled release of a substance by a cell." [GOC:mah]	1351	168	36	18123	0.214286	0.0266469	FB1	['GO:0046903', 'GO:0140352']	['ADM', 'AXL', 'C3', 'CD55', 'CFD', 'CLEC3B', 'CLU', 'CST3', 'CXCL12', 'CYB5R3', 'ECM1', 'FTH1', 'FTL', 'GSN', 'ISLR', 'LGALS3', 'LRP1', 'LTBP2', 'LTBP4', 'LY6E', 'MGST1', 'NPC2', 'PAM', 'PTGES', 'S100A11', 'S100A13', 'SDCBP', 'SERPING1', 'SLPI', 'TIMP1', 'TIMP2', 'TIMP3', 'TMSB4X', 'TNFAIP2', 'TNFAIP6', 'VAT1']
123	GO:BP	GO:0048729	tissue morphogenesis	1.30194e-05	TRUE	"The process in which the anatomical structures of a tissue are generated and organized." [GOC:dph, GOC:jid]	675	92	18	18123	0.195652	0.0266667	FB2	['GO:0009653', 'GO:0009888']	['COL11A1', 'COL4A1', 'EDNRA', 'GPC3', 'HES1', 'HEY2', 'INHBA', 'KRT16', 'KRT17', 'LMO4', 'MAGED1', 'MDK', 'MEF2C', 'PTCH1', 'ROBO2', 'SNAI2', 'SOX4', 'WNT5A']
124	GO:BP	GO:0014706	striated muscle tissue development	1.34165e-05	TRUE	"The process whose specific outcome is the progression of a striated muscle over time, from its formation to the mature structure. Striated muscle contain fibers that are divided by transverse bands into striations, and cardiac and skeletal muscle are types of striated muscle. Skeletal muscle myoblasts fuse to form myotubes and eventually multinucleated muscle fibers. The fusion of cardiac cells …	390	155	18	18123	0.116129	0.0461538	FB3	['GO:0060537']	['ATF3', 'BMP4', 'BTG2', 'CHRNA1', 'EEF2', 'EGR1', 'FOS', 'GREM1', 'HEY1', 'KLHL41', 'MAFF', 'MIR24-2', 'MSC', 'MYF5', 'MYF6', 'NACA', 'SIRT2', 'STAC3']
125	GO:BP	GO:0035914	skeletal muscle cell differentiation	1.61605e-05	TRUE	"The process in which a relatively unspecialized cell acquires specialized features of a skeletal muscle cell, a somatic cell located in skeletal muscle." [CL:0000188, GOC:BHF, GOC:vk]	70	155	9	18123	0.0580645	0.128571	FB3	['GO:0007519', 'GO:0030154']	['ATF3', 'BTG2', 'EEF2', 'EGR1', 'FOS', 'KLHL41', 'MAFF', 'MYF5', 'MYF6']
126	GO:BP	GO:0044267	cellular protein metabolic process	1.65671e-05	TRUE	"The chemical reactions and pathways involving a specific protein, rather than of proteins in general, occurring at the level of an individual cell. Includes cellular protein modification." [GOC:jl]	5280	155	79	18123	0.509677	0.0149621	FB3	['GO:0019538', 'GO:0044260']	['APOE', 'ATF3', 'BMP4', 'BST2', 'BTG1', 'BTG2', 'CCL2', 'CDKN1C', 'CIRBP', 'CXCR4', 'DAG1', 'DDIT4', 'EEF2', 'EGR1', 'EIF3L', 'EIF4A2', 'FBL', 'FGFR4', 'GADD45B', 'GAPDH', 'GREM1', 'HES1', 'HSP90AB1', 'KLHL41', 'MIR24-2', 'MYC', 'NACA', 'NPM1', 'NUDT14', 'PDK4', 'PPP1R14B', 'PTPRE', 'RPL10', 'RPL10A', 'RPL12', 'RPL13', 'RPL15', 'RPL17', 'RPL18', 'RPL21', 'RPL23A', 'RPL24', 'RPL26', 'RPL3', 'RPL3…
127	GO:BP	GO:0097435	supramolecular fiber organization	1.79596e-05	TRUE	"A process that is carried out at the cellular level which results in the assembly, arrangement of constituent parts, or disassembly of a supramolecular fiber, a polymer consisting of an indefinite number of protein or protein complex subunits that have polymerised to form a fiber-shaped structure." [GOC:pr]	863	92	20	18123	0.217391	0.023175	FB2	['GO:0016043']	['CALD1', 'COL11A1', 'COL1A1', 'COL1A2', 'COL21A1', 'COL3A1', 'COL4A1', 'COL4A2', 'COL5A2', 'COL6A1', 'COL6A3', 'FSCN1', 'KRT17', 'LUM', 'MARCKSL1', 'SERPINH1', 'STMN1', 'STMN2', 'TPM2', 'VIM']
128	GO:BP	GO:0048514	blood vessel morphogenesis	2.07545e-05	TRUE	"The process in which the anatomical structures of blood vessels are generated and organized. The blood vessel is the vasculature carrying blood." [GOC:jid]	715	168	25	18123	0.14881	0.034965	FB1	['GO:0001568', 'GO:0035239']	['ACKR3', 'ADM', 'ANGPTL1', 'ANGPTL2', 'APOD', 'C3', 'CD34', 'DCN', 'ECM1', 'GPNMB', 'HSPG2', 'ITGB1BP1', 'LEPR', 'LRP1', 'MMP2', 'PDGFRB', 'PTGIS', 'RAMP2', 'RBPJ', 'RNH1', 'SERPINF1', 'SFRP2', 'TGFBR3', 'THBS2', 'TNFAIP2']
129	GO:BP	GO:0009719	response to endogenous stimulus	2.47126e-05	TRUE	"Any process that results in a change in state or activity of a cell or an organism (in terms of movement, secretion, enzyme production, gene expression, etc.) as a result of a stimulus arising within the organism." [GOC:sm]	1729	168	41	18123	0.244048	0.0237131	FB1	['GO:0050896']	['ADM', 'AKR1C1', 'AKR1C2', 'AKR1C3', 'CD81', 'CHRDL1', 'CLEC3B', 'CXCL12', 'FBN1', 'FIBIN', 'FSTL1', 'IGFBP5', 'IGFBP7', 'ITGB1BP1', 'JUND', 'LEPR', 'LEPROT', 'LRP1', 'LTBP2', 'LTBP4', 'MMP2', 'NBL1', 'PAM', 'PDGFD', 'PDGFRB', 'POLR2L', 'RAMP2', 'RBPJ', 'SDCBP', 'SERPINF1', 'SFRP2', 'SFRP4', 'SLIT3', 'TFPI', 'TGFBR3', 'TIMP1', 'TIMP2', 'TIMP3', 'TXNIP', 'VASN', 'YWHAH']
130	GO:BP	GO:0016477	cell migration	2.50173e-05	TRUE	"The controlled self-propelled movement of a cell from one site to a destination guided by molecular cues. Cell migration is a central process in the development and maintenance of multicellular organisms." [GOC:cjm, GOC:dph, GOC:ems, GOC:pf, Wikipedia:Cell_migration]	1660	168	40	18123	0.238095	0.0240964	FB1	['GO:0048870']	['ACKR3', 'ACKR4', 'AKAP12', 'APOD', 'AXL', 'CD248', 'CD34', 'CD81', 'CTHRC1', 'CXCL12', 'DCN', 'ECM1', 'FBLN1', 'FSTL1', 'GPNMB', 'GYPC', 'HSD3B7', 'IGFBP5', 'IGFBP6', 'ITGB1BP1', 'LGALS3', 'LIMA1', 'LRP1', 'NBL1', 'NTN4', 'PDGFD', 'PDGFRB', 'PODN', 'S100A11', 'SDC2', 'SDCBP', 'SEMA3C', 'SERPINF1', 'SFRP2', 'SPOCK1', 'TGFBR3', 'TIMP1', 'TMSB4X', 'TNFAIP6', 'XG']
131	GO:BP	GO:0001944	vasculature development	2.54174e-05	TRUE	"The process whose specific outcome is the progression of the vasculature over time, from its formation to the mature structure. The vasculature is an interconnected tubular multi-tissue structure that contains fluid that is actively transported around the organism." [GOC:dph, UBERON:0002409]	834	168	27	18123	0.160714	0.0323741	FB1	['GO:0048731', 'GO:0072359']	['ACKR3', 'ADM', 'ANGPTL1', 'ANGPTL2', 'APOD', 'C3', 'CD34', 'DCN', 'ECM1', 'GPNMB', 'HSPG2', 'ITGB1BP1', 'LEPR', 'LRP1', 'MMP2', 'PDGFD', 'PDGFRB', 'PTGIS', 'RAMP2', 'RBPJ', 'RNH1', 'SEMA3C', 'SERPINF1', 'SFRP2', 'TGFBR3', 'THBS2', 'TNFAIP2']
132	GO:BP	GO:0090304	nucleic acid metabolic process	2.78715e-05	TRUE	"Any cellular metabolic process involving nucleic acids." [GOC:dph, GOC:tb]	5234	155	78	18123	0.503226	0.0149026	FB3	['GO:0006139', 'GO:0043170']	['ADIRF', 'APOE', 'ATF3', 'BMP4', 'BTG1', 'BTG2', 'CDKN1C', 'CHCHD10', 'CIRBP', 'CSRNP1', 'EGR1', 'EIF4A2', 'FBL', 'FGFR4', 'FOS', 'FOSB', 'GREM1', 'HES1', 'HEY1', 'HSP90AB1', 'JUN', 'JUNB', 'KLF10', 'MAFF', 'MSC', 'MYC', 'MYF5', 'MYF6', 'NACA', 'NOTCH3', 'NPM1', 'NPPC', 'PAX7', 'PITX2', 'RPL10', 'RPL10A', 'RPL12', 'RPL13', 'RPL15', 'RPL17', 'RPL18', 'RPL21', 'RPL23A', 'RPL24', 'RPL26', 'RPL3', '…
133	GO:BP	GO:0060537	muscle tissue development	2.80296e-05	TRUE	"The progression of muscle tissue over time, from its initial formation to its mature state. Muscle tissue is a contractile tissue made up of actin and myosin fibers." [GOC:dph]	409	155	18	18123	0.116129	0.0440098	FB3	['GO:0009888']	['ATF3', 'BMP4', 'BTG2', 'CHRNA1', 'EEF2', 'EGR1', 'FOS', 'GREM1', 'HEY1', 'KLHL41', 'MAFF', 'MIR24-2', 'MSC', 'MYF5', 'MYF6', 'NACA', 'SIRT2', 'STAC3']
134	GO:BP	GO:0001568	blood vessel development	2.86134e-05	TRUE	"The process whose specific outcome is the progression of a blood vessel over time, from its formation to the mature structure. The blood vessel is the vasculature carrying blood." [GOC:hjd, UBERON:0001981]	797	92	19	18123	0.206522	0.0238394	FB2	['GO:0001944', 'GO:0048856']	['CALD1', 'COL1A1', 'COL1A2', 'COL4A1', 'COL4A2', 'CREB3L1', 'EDNRA', 'ENPP2', 'GPC3', 'HES1', 'HEY2', 'MDK', 'MEF2C', 'PLK2', 'ROBO2', 'SOX4', 'SPARC', 'TNMD', 'WNT5A']
135	GO:BP	GO:0006725	cellular aromatic compound metabolic process	3.01016e-05	TRUE	"The chemical reactions and pathways involving aromatic compounds, any organic compound characterized by one or more planar rings, each of which contains conjugated double bonds and delocalized pi electrons, as carried out by individual cells." [GOC:ai, ISBN:0198506732]	5973	155	85	18123	0.548387	0.0142307	FB3	['GO:0044237']	['ADIRF', 'ALDOA', 'APOE', 'ATF3', 'BMP4', 'BTG1', 'BTG2', 'CDKN1C', 'CHCHD10', 'CIRBP', 'CSRNP1', 'DDIT4', 'EGR1', 'EIF4A2', 'FBL', 'FGFR4', 'FOS', 'FOSB', 'GAPDH', 'GREM1', 'HES1', 'HEY1', 'HSP90AB1', 'IMPDH2', 'JUN', 'JUNB', 'KLF10', 'MAFF', 'MSC', 'MYC', 'MYF5', 'MYF6', 'NACA', 'NOTCH3', 'NPM1', 'NPPC', 'NUDT14', 'PAX7', 'PDK4', 'PITX2', 'PON2', 'RPL10', 'RPL10A', 'RPL12', 'RPL13', 'RPL15', '…
136	GO:BP	GO:0045055	regulated exocytosis	3.5069e-05	TRUE	"A process of exocytosis in which soluble proteins and other substances are initially stored in secretory vesicles for later release. It is found mainly in cells that are specialized for secreting products such as hormones, neurotransmitters, or digestive enzymes rapidly on demand." [GOC:mah, ISBN:0716731363]	790	168	26	18123	0.154762	0.0329114	FB1	['GO:0006887']	['C3', 'CD55', 'CFD', 'CLEC3B', 'CLU', 'CST3', 'CYB5R3', 'ECM1', 'FTH1', 'FTL', 'GSN', 'ISLR', 'LGALS3', 'MGST1', 'NPC2', 'S100A11', 'S100A13', 'SDCBP', 'SERPING1', 'SLPI', 'TIMP1', 'TIMP2', 'TIMP3', 'TMSB4X', 'TNFAIP6', 'VAT1']
137	GO:BP	GO:0016192	vesicle-mediated transport	3.81702e-05	TRUE	"A cellular transport process in which transported substances are moved in membrane-bounded vesicles; transported substances are enclosed in the vesicle lumen or located in the vesicle membrane. The process begins with a step that directs a substance to the forming vesicle, and includes vesicle budding and coating. Vesicles are then targeted to, and fuse with, an acceptor membrane." [GOC:ai, GOC:…	2193	168	47	18123	0.279762	0.0214318	FB1	['GO:0006810', 'GO:0009987']	['ACKR3', 'ACKR4', 'ADM', 'ANK2', 'AXL', 'C3', 'CD55', 'CD81', 'CFD', 'CLEC3B', 'CLTB', 'CLU', 'CST3', 'CYB5R3', 'ECM1', 'FTH1', 'FTL', 'GAS1', 'GSN', 'HSPG2', 'ISLR', 'LEPR', 'LEPROT', 'LGALS3', 'LRP1', 'MGST1', 'MRC2', 'NPC2', 'PRG4', 'RAB32', 'RAMP2', 'S100A11', 'S100A13', 'SCARA5', 'SDCBP', 'SERPING1', 'SFRP4', 'SLPI', 'SSC5D', 'TIMP1', 'TIMP2', 'TIMP3', 'TMSB4X', 'TNFAIP2', 'TNFAIP6', 'TRIP1…
138	GO:BP	GO:0140352	export from cell	3.8857e-05	TRUE	"The directed movement of some substance from a cell, into the extracellular region. This may occur via transport across the plasma membrane or via exocytosis." [GOC:pg]	1413	168	36	18123	0.214286	0.0254777	FB1	['GO:0006810', 'GO:0009987']	['ADM', 'AXL', 'C3', 'CD55', 'CFD', 'CLEC3B', 'CLU', 'CST3', 'CXCL12', 'CYB5R3', 'ECM1', 'FTH1', 'FTL', 'GSN', 'ISLR', 'LGALS3', 'LRP1', 'LTBP2', 'LTBP4', 'LY6E', 'MGST1', 'NPC2', 'PAM', 'PTGES', 'S100A11', 'S100A13', 'SDCBP', 'SERPING1', 'SLPI', 'TIMP1', 'TIMP2', 'TIMP3', 'TMSB4X', 'TNFAIP2', 'TNFAIP6', 'VAT1']
139	GO:BP	GO:0030154	cell differentiation	4.41598e-05	TRUE	"The process in which relatively unspecialized cells, e.g. embryonic or regenerative cells, acquire specialized structural and/or functional features that characterize the cells, tissues, or organs of the mature organism or some other relatively stable phase of the organism's life history. Differentiation includes the processes involved in commitment of a cell to a specific fate and its subsequen…	4392	92	47	18123	0.51087	0.0107013	FB2	['GO:0048869']	['ALPL', 'CCND1', 'CDH11', 'COL11A1', 'COL1A1', 'COL3A1', 'COL4A1', 'COL4A2', 'COL5A2', 'COL6A1', 'CREB3L1', 'EDNRA', 'EDNRB', 'GPC3', 'HES1', 'HEY2', 'ID3', 'INHBA', 'KRT16', 'KRT17', 'LAMC3', 'LMO4', 'MDK', 'MEF2C', 'NAP1L1', 'NOTCH3', 'PALLD', 'PLK2', 'POSTN', 'PTCH1', 'RAB13', 'ROBO2', 'SERPINE2', 'SERPINH1', 'SNAI2', 'SOX4', 'STMN1', 'STMN2', 'TAGLN', 'TMEM119', 'TNMD', 'TNN', 'TRPS1', 'VCAN…
140	GO:BP	GO:0048731	system development	4.46302e-05	TRUE	"The process whose specific outcome is the progression of an organismal system over time, from its formation to the mature structure. A system is a regularly interacting or interdependent group of organs or tissues that work together to carry out a given biological process." [GOC:dph, GOC:jid]	5095	168	81	18123	0.482143	0.0158979	FB1	['GO:0007275', 'GO:0048856']	['ABI3BP', 'ACKR3', 'ADM', 'AKR1C3', 'ANGPTL1', 'ANGPTL2', 'ANK2', 'APOD', 'AXL', 'C3', 'CD248', 'CD34', 'CD81', 'CHRDL1', 'CLDN11', 'CLEC3B', 'CLU', 'CRIP1', 'CTHRC1', 'CTSK', 'CXCL12', 'DBN1', 'DCN', 'ECM1', 'EFEMP1', 'ELN', 'FBN1', 'GAS7', 'GFRA1', 'GPNMB', 'GSN', 'HSPG2', 'IGFBP5', 'IL6ST', 'ITGB1BP1', 'ITM2A', 'ITM2B', 'LEPR', 'LGALS3', 'LRP1', 'LY6E', 'MGP', 'MGST1', 'MMP2', 'NBL1', 'NDRG1'…
141	GO:BP	GO:0046903	secretion	4.79054e-05	TRUE	"The controlled release of a substance by a cell or a tissue." [GOC:ai]	1492	168	37	18123	0.220238	0.0247989	FB1	['GO:0006810']	['ADM', 'AXL', 'C3', 'CD55', 'CFD', 'CLEC3B', 'CLU', 'CST3', 'CXCL12', 'CYB5R3', 'ECM1', 'FBLN5', 'FTH1', 'FTL', 'GSN', 'ISLR', 'LGALS3', 'LRP1', 'LTBP2', 'LTBP4', 'LY6E', 'MGST1', 'NPC2', 'PAM', 'PTGES', 'S100A11', 'S100A13', 'SDCBP', 'SERPING1', 'SLPI', 'TIMP1', 'TIMP2', 'TIMP3', 'TMSB4X', 'TNFAIP2', 'TNFAIP6', 'VAT1']
142	GO:BP	GO:0034641	cellular nitrogen compound metabolic process	5.08919e-05	TRUE	"The chemical reactions and pathways involving various organic and inorganic nitrogenous compounds, as carried out by individual cells." [GOC:mah]	6576	155	90	18123	0.580645	0.0136861	FB3	['GO:0006807', 'GO:0044237']	['ADIRF', 'ALDOA', 'APOE', 'ATF3', 'BMP4', 'BTG1', 'BTG2', 'CDKN1C', 'CHCHD10', 'CIRBP', 'CSRNP1', 'DDIT4', 'EEF2', 'EGR1', 'EIF3L', 'EIF4A2', 'FBL', 'FGFR4', 'FOS', 'FOSB', 'GAPDH', 'GREM1', 'HES1', 'HEY1', 'HSP90AB1', 'IMPDH2', 'JUN', 'JUNB', 'KLF10', 'MAFF', 'MIR24-2', 'MSC', 'MYC', 'MYF5', 'MYF6', 'NACA', 'NOTCH3', 'NPM1', 'NPPC', 'NUDT14', 'PAX7', 'PDK4', 'PITX2', 'RPL10', 'RPL10A', 'RPL12',…
143	GO:BP	GO:0046483	heterocycle metabolic process	5.16488e-05	TRUE	"The chemical reactions and pathways involving heterocyclic compounds, those with a cyclic molecular structure and at least two different atoms in the ring (or rings)." [ISBN:0198506732]	5929	155	84	18123	0.541935	0.0141677	FB3	['GO:0044237']	['ADIRF', 'ALDOA', 'APOE', 'ATF3', 'BMP4', 'BTG1', 'BTG2', 'CDKN1C', 'CHCHD10', 'CIRBP', 'CSRNP1', 'DDIT4', 'EGR1', 'EIF4A2', 'FBL', 'FGFR4', 'FOS', 'FOSB', 'GAPDH', 'GREM1', 'HES1', 'HEY1', 'HSP90AB1', 'IMPDH2', 'JUN', 'JUNB', 'KLF10', 'MAFF', 'MSC', 'MYC', 'MYF5', 'MYF6', 'NACA', 'NOTCH3', 'NPM1', 'NPPC', 'NUDT14', 'PAX7', 'PDK4', 'PITX2', 'RPL10', 'RPL10A', 'RPL12', 'RPL13', 'RPL15', 'RPL17', …
144	GO:BP	GO:0007155	cell adhesion	5.70231e-05	TRUE	"The attachment of a cell, either to another cell or to an underlying substrate such as the extracellular matrix, via cell adhesion molecules." [GOC:hb, GOC:pf]	1502	168	37	18123	0.220238	0.0246338	FB1	['GO:0009987', 'GO:0022610']	['ABI3BP', 'ACKR3', 'APOD', 'AXL', 'CCDC80', 'CD34', 'CD55', 'CD81', 'CLDN11', 'COL12A1', 'COL14A1', 'CXCL12', 'DPT', 'ENTPD1', 'FBLN1', 'FBLN2', 'FBLN5', 'FBN1', 'GPNMB', 'GSN', 'IGFBP7', 'IL6ST', 'ISLR', 'ITGB1BP1', 'LGALS3', 'LRP1', 'MFAP4', 'NT5E', 'NTN4', 'OMD', 'S100A11', 'SFRP2', 'SPOCK1', 'THBS2', 'TNFAIP6', 'TNXB', 'XG']
145	GO:BP	GO:0051241	negative regulation of multicellular organismal process	5.8847e-05	TRUE	"Any process that stops, prevents, or reduces the frequency, rate or extent of an organismal process, the processes pertinent to the function of an organism above the cellular level; includes the integrated processes of tissues and organs." [GOC:ai]	1174	168	32	18123	0.190476	0.0272572	FB1	['GO:0032501', 'GO:0048519', 'GO:0051239']	['ABI3BP', 'ADM', 'APOD', 'AXL', 'CD34', 'CST3', 'CTSK', 'DCN', 'ECM1', 'EFEMP1', 'FBLN1', 'FBN1', 'GPNMB', 'HSPG2', 'IGFBP5', 'ITGB1BP1', 'NOVA1', 'PI16', 'RBPJ', 'SEMA3C', 'SERPINF1', 'SERPING1', 'SFRP2', 'SSC5D', 'TFPI', 'THBS2', 'TIMP1', 'TMEM176A', 'TMEM176B', 'TMSB4X', 'VASN', 'YWHAH']
146	GO:BP	GO:0001944	vasculature development	5.90826e-05	TRUE	"The process whose specific outcome is the progression of the vasculature over time, from its formation to the mature structure. The vasculature is an interconnected tubular multi-tissue structure that contains fluid that is actively transported around the organism." [GOC:dph, UBERON:0002409]	834	92	19	18123	0.206522	0.0227818	FB2	['GO:0048731', 'GO:0072359']	['CALD1', 'COL1A1', 'COL1A2', 'COL4A1', 'COL4A2', 'CREB3L1', 'EDNRA', 'ENPP2', 'GPC3', 'HES1', 'HEY2', 'MDK', 'MEF2C', 'PLK2', 'ROBO2', 'SOX4', 'SPARC', 'TNMD', 'WNT5A']
147	GO:BP	GO:0030154	cell differentiation	6.19246e-05	TRUE	"The process in which relatively unspecialized cells, e.g. embryonic or regenerative cells, acquire specialized structural and/or functional features that characterize the cells, tissues, or organs of the mature organism or some other relatively stable phase of the organism's life history. Differentiation includes the processes involved in commitment of a cell to a specific fate and its subsequen…	4392	168	73	18123	0.434524	0.0166211	FB1	['GO:0048869']	['ABI3BP', 'ACKR3', 'ADM', 'AKR1C1', 'AKR1C2', 'AKR1C3', 'ANK2', 'APOD', 'AXL', 'C3', 'CD34', 'CD81', 'CHRDL1', 'CLU', 'COL12A1', 'CTHRC1', 'CTSK', 'CXCL12', 'DBN1', 'ECM1', 'EFEMP1', 'FBLN1', 'FBN1', 'FSTL1', 'GAS1', 'GAS7', 'GFRA1', 'GPNMB', 'GSN', 'HSPG2', 'IGFBP5', 'IL6ST', 'ITGB1BP1', 'ITM2A', 'JUND', 'LEPR', 'LGALS3', 'LRP1', 'LTBP4', 'MEDAG', 'MGP', 'MGST1', 'MMP2', 'MRC2', 'NBL1', 'NDRG1'…
148	GO:BP	GO:0022610	biological adhesion	6.43537e-05	TRUE	"The attachment of a cell or organism to a substrate, another cell, or other organism. Biological adhesion includes intracellular attachment between membrane regions." [GOC:isa_complete]	1509	168	37	18123	0.220238	0.0245195	FB1	['GO:0008150']	['ABI3BP', 'ACKR3', 'APOD', 'AXL', 'CCDC80', 'CD34', 'CD55', 'CD81', 'CLDN11', 'COL12A1', 'COL14A1', 'CXCL12', 'DPT', 'ENTPD1', 'FBLN1', 'FBLN2', 'FBLN5', 'FBN1', 'GPNMB', 'GSN', 'IGFBP7', 'IL6ST', 'ISLR', 'ITGB1BP1', 'LGALS3', 'LRP1', 'MFAP4', 'NT5E', 'NTN4', 'OMD', 'S100A11', 'SFRP2', 'SPOCK1', 'THBS2', 'TNFAIP6', 'TNXB', 'XG']
149	GO:BP	GO:0070887	cellular response to chemical stimulus	7.12141e-05	TRUE	"Any process that results in a change in state or activity of a cell (in terms of movement, secretion, enzyme production, gene expression, etc.) as a result of a chemical stimulus." [GOC:mah]	3443	168	62	18123	0.369048	0.0180076	FB1	['GO:0042221', 'GO:0051716']	['ACKR3', 'ACKR4', 'AKAP12', 'AKR1C1', 'AKR1C2', 'AKR1C3', 'AXL', 'CD34', 'CD55', 'CHRDL1', 'CLEC3B', 'CLU', 'CRIP1', 'CXCL12', 'CYB5R3', 'DCN', 'ECM1', 'EPHX1', 'FBLN5', 'FBN1', 'FSTL1', 'GAS1', 'GPX3', 'GPX4', 'GSN', 'HSD3B7', 'IGFBP5', 'IGFBP7', 'IL6ST', 'ITGB1BP1', 'JUND', 'LEPR', 'LEPROT', 'LGALS3', 'LRP1', 'LTBP2', 'LTBP4', 'LY6E', 'MGST1', 'MMP2', 'NBL1', 'NDRG1', 'PCOLCE2', 'PDGFD', 'PDGF…
150	GO:BP	GO:2000026	regulation of multicellular organismal development	7.76584e-05	TRUE	"Any process that modulates the frequency, rate or extent of multicellular organismal development." [GOC:obol]	1459	92	25	18123	0.271739	0.017135	FB2	['GO:0007275', 'GO:0050793', 'GO:0051239']	['ASPN', 'CCND1', 'COL4A2', 'CREB3L1', 'ENPP2', 'HES1', 'HEY2', 'INHBA', 'KRT17', 'MDK', 'MEF2C', 'NAP1L1', 'PLK2', 'PTCH1', 'RBP4', 'ROBO2', 'SERPINE2', 'SNAI2', 'SOX4', 'SPARC', 'TMEM119', 'TNMD', 'TRPS1', 'WNT5A', 'WWTR1']
151	GO:BP	GO:0072001	renal system development	8.12355e-05	TRUE	"The process whose specific outcome is the progression of the renal system over time, from its formation to the mature structure. The renal system maintains fluid balance and contributes to electrolyte balance, acid/base balance, and disposal of nitrogenous waste products. In humans, the renal system comprises a pair of kidneys, a pair of ureters, urinary bladder, urethra, sphincter muscle and as…	303	92	12	18123	0.130435	0.039604	FB2	['GO:0001655', 'GO:0048731']	['COL4A1', 'GPC3', 'HES1', 'ID3', 'MAGED1', 'MEF2C', 'PTCH1', 'RBP4', 'ROBO2', 'SOX4', 'WNT5A', 'WWTR1']
152	GO:BP	GO:0022008	neurogenesis	9.01917e-05	TRUE	"Generation of cells within the nervous system." [GO_REF:0000021, GOC:cls, GOC:curators, GOC:dgh, GOC:dph, GOC:jid]	1698	92	27	18123	0.293478	0.0159011	FB2	['GO:0007399', 'GO:0030154']	['CDH11', 'COL3A1', 'EDNRB', 'HES1', 'HEY2', 'ID3', 'INHBA', 'LAMC3', 'LMO4', 'MDK', 'MEF2C', 'NAP1L1', 'NOTCH3', 'PALLD', 'PLK2', 'POSTN', 'PTCH1', 'RAB13', 'ROBO2', 'SERPINE2', 'SOX4', 'STMN1', 'STMN2', 'TNN', 'VCAN', 'VIM', 'WNT5A']
153	GO:BP	GO:0007507	heart development	9.59077e-05	TRUE	"The process whose specific outcome is the progression of the heart over time, from its formation to the mature structure. The heart is a hollow, muscular organ, which, by contracting rhythmically, keeps up the circulation of the blood." [GOC:jid, UBERON:0000948]	598	92	16	18123	0.173913	0.0267559	FB2	['GO:0048513', 'GO:0072359']	['COL11A1', 'COL3A1', 'EDNRA', 'GPC3', 'HES1', 'HEY2', 'ID3', 'LMO4', 'MEF2C', 'PTCH1', 'RBP4', 'ROBO2', 'SNAI2', 'SOX4', 'SPARC', 'WNT5A']
154	GO:BP	GO:0070848	response to growth factor	9.61832e-05	TRUE	"Any process that results in a change in state or activity of a cell or an organism (in terms of movement, secretion, enzyme production, gene expression, etc.) as a result of a growth factor stimulus." [GOC:BHF, GOC:mah]	769	92	18	18123	0.195652	0.023407	FB2	['GO:0010033']	['ASPN', 'COL1A1', 'COL1A2', 'COL3A1', 'COL4A2', 'CREB3L1', 'DKK3', 'GPC3', 'HES1', 'HNRNPA1', 'LUM', 'MEF2C', 'MXRA5', 'POSTN', 'SNAI2', 'STMN2', 'TNMD', 'WNT5A']
155	GO:BP	GO:0006928	movement of cell or subcellular component	9.6854e-05	TRUE	"The directed, self-propelled movement of a cell or subcellular component without the involvement of an external agent such as a transporter or a pore." [GOC:dgh, GOC:dph, GOC:jl, GOC:mlg]	2319	92	32	18123	0.347826	0.0137991	FB2	['GO:0009987']	['COL1A1', 'COL1A2', 'COL3A1', 'DPEP1', 'EDNRB', 'ENPP2', 'F2R', 'FSCN1', 'GPC3', 'HES1', 'KRT16', 'LAMC3', 'LMO4', 'MDK', 'MEF2C', 'MYL4', 'NOTCH3', 'PALLD', 'PLK2', 'POSTN', 'PTCH1', 'RAB13', 'ROBO2', 'SERPINE2', 'SNAI2', 'SPARC', 'STMN1', 'TNN', 'TPM2', 'VCAN', 'VIM', 'WNT5A']
156	GO:BP	GO:0051216	cartilage development	0.000101472	TRUE	"The process whose specific outcome is the progression of a cartilage element over time, from its formation to the mature structure. Cartilage elements are skeletal elements that consist of connective tissue dominated by extracellular matrix containing collagen type II and large amounts of proteoglycan, particularly chondroitin sulfate." [GOC:cjm, PMID:23251424]	194	92	10	18123	0.108696	0.0515464	FB2	['GO:0001501', 'GO:0048513', 'GO:0061448']	['BGN', 'COL11A1', 'COL1A1', 'LUM', 'MDK', 'MEF2C', 'SERPINH1', 'SNAI2', 'TRPS1', 'WNT5A']
157	GO:BP	GO:0010033	response to organic substance	0.000129403	TRUE	"Any process that results in a change in state or activity of a cell or an organism (in terms of movement, secretion, enzyme production, gene expression, etc.) as a result of an organic substance stimulus." [GOC:sm, PMID:23356676]	3457	92	40	18123	0.434783	0.0115707	FB2	['GO:0042221']	['ALPL', 'ASPN', 'CCND1', 'COL1A1', 'COL1A2', 'COL3A1', 'COL4A1', 'COL4A2', 'COL5A2', 'COL6A1', 'CREB3L1', 'DKK3', 'EDNRB', 'F2R', 'FSCN1', 'GPC3', 'HES1', 'HNRNPA1', 'ID3', 'IL11RA', 'INHBA', 'LUM', 'MDK', 'MEF2C', 'MXRA5', 'NPM1', 'POSTN', 'PTCH1', 'RAB13', 'RBP4', 'ROBO2', 'SERPINH1', 'SNAI2', 'SOX4', 'SPARC', 'STMN2', 'TNMD', 'UGT3A2', 'VIM', 'WNT5A']
158	GO:BP	GO:0061448	connective tissue development	0.000130539	TRUE	"The progression of a connective tissue over time, from its formation to the mature structure." [GOC:BHF]	255	92	11	18123	0.119565	0.0431373	FB2	['GO:0009888']	['BGN', 'COL11A1', 'COL1A1', 'LUM', 'MDK', 'MEF2C', 'SERPINH1', 'SNAI2', 'TNMD', 'TRPS1', 'WNT5A']
159	GO:BP	GO:0048869	cellular developmental process	0.000130947	TRUE	"A biological process whose specific outcome is the progression of a cell over time from an initial condition to a later condition." [GOC:isa_complete]	4468	168	73	18123	0.434524	0.0163384	FB1	['GO:0009987', 'GO:0032502']	['ABI3BP', 'ACKR3', 'ADM', 'AKR1C1', 'AKR1C2', 'AKR1C3', 'ANK2', 'APOD', 'AXL', 'C3', 'CD34', 'CD81', 'CHRDL1', 'CLU', 'COL12A1', 'CTHRC1', 'CTSK', 'CXCL12', 'DBN1', 'ECM1', 'EFEMP1', 'FBLN1', 'FBN1', 'FSTL1', 'GAS1', 'GAS7', 'GFRA1', 'GPNMB', 'GSN', 'HSPG2', 'IGFBP5', 'IL6ST', 'ITGB1BP1', 'ITM2A', 'JUND', 'LEPR', 'LGALS3', 'LRP1', 'LTBP4', 'MEDAG', 'MGP', 'MGST1', 'MMP2', 'MRC2', 'NBL1', 'NDRG1'…
160	GO:BP	GO:0006887	exocytosis	0.000140202	TRUE	"A process of secretion by a cell that results in the release of intracellular molecules (e.g. hormones, matrix proteins) contained within a membrane-bounded vesicle. Exocytosis can occur either by full fusion, when the vesicle collapses into the plasma membrane, or by a kiss-and-run mechanism that involves the formation of a transient contact, a pore, between a granule (for exemple of chromaffin…	906	168	27	18123	0.160714	0.0298013	FB1	['GO:0016192', 'GO:0032940']	['C3', 'CD55', 'CFD', 'CLEC3B', 'CLU', 'CST3', 'CYB5R3', 'ECM1', 'FTH1', 'FTL', 'GSN', 'ISLR', 'LGALS3', 'MGST1', 'NPC2', 'S100A11', 'S100A13', 'SDCBP', 'SERPING1', 'SLPI', 'TIMP1', 'TIMP2', 'TIMP3', 'TMSB4X', 'TNFAIP2', 'TNFAIP6', 'VAT1']
161	GO:BP	GO:0048870	cell motility	0.000141731	TRUE	"Any process involved in the controlled self-propelled movement of a cell that results in translocation of the cell from one place to another." [GOC:dgh, GOC:dph, GOC:isa_complete, GOC:mlg]	1840	168	41	18123	0.244048	0.0222826	FB1	['GO:0006928', 'GO:0040011', 'GO:0051674']	['ACKR3', 'ACKR4', 'AKAP12', 'APOD', 'AXL', 'CD248', 'CD34', 'CD81', 'CTHRC1', 'CXCL12', 'DCN', 'ECM1', 'FBLN1', 'FSTL1', 'GPNMB', 'GYPC', 'HSD3B7', 'IGFBP5', 'IGFBP6', 'ITGB1BP1', 'LGALS3', 'LIMA1', 'LRP1', 'NBL1', 'NTN4', 'PDGFD', 'PDGFRB', 'PLTP', 'PODN', 'S100A11', 'SDC2', 'SDCBP', 'SEMA3C', 'SERPINF1', 'SFRP2', 'SPOCK1', 'TGFBR3', 'TIMP1', 'TMSB4X', 'TNFAIP6', 'XG']
162	GO:BP	GO:0051674	localization of cell	0.000141731	TRUE	"Any process in which a cell is transported to, and/or maintained in, a specific location." [GOC:ai]	1840	168	41	18123	0.244048	0.0222826	FB1	['GO:0009987', 'GO:0051179']	['ACKR3', 'ACKR4', 'AKAP12', 'APOD', 'AXL', 'CD248', 'CD34', 'CD81', 'CTHRC1', 'CXCL12', 'DCN', 'ECM1', 'FBLN1', 'FSTL1', 'GPNMB', 'GYPC', 'HSD3B7', 'IGFBP5', 'IGFBP6', 'ITGB1BP1', 'LGALS3', 'LIMA1', 'LRP1', 'NBL1', 'NTN4', 'PDGFD', 'PDGFRB', 'PLTP', 'PODN', 'S100A11', 'SDC2', 'SDCBP', 'SEMA3C', 'SERPINF1', 'SFRP2', 'SPOCK1', 'TGFBR3', 'TIMP1', 'TMSB4X', 'TNFAIP6', 'XG']
163	GO:BP	GO:0016043	cellular component organization	0.000164375	TRUE	"A process that results in the assembly, arrangement of constituent parts, or disassembly of a cellular component." [GOC:ai, GOC:jl, GOC:mah]	6661	92	59	18123	0.641304	0.00885753	FB2	['GO:0071840']	['ADAMTS18', 'BGN', 'CALD1', 'CDH11', 'CENPW', 'COL11A1', 'COL1A1', 'COL1A2', 'COL21A1', 'COL3A1', 'COL4A1', 'COL4A2', 'COL5A2', 'COL6A1', 'COL6A3', 'CREB3L1', 'ENPP2', 'F2R', 'FSCN1', 'GEM', 'GPC3', 'HAPLN1', 'HES1', 'HEY2', 'HMGN1', 'HNRNPA1', 'INHBA', 'KRT16', 'KRT17', 'LAMC3', 'LMO4', 'LUM', 'MARCKSL1', 'MDK', 'MEF2C', 'MFAP2', 'NAP1L1', 'NOTCH3', 'NPM1', 'PALLD', 'PLK2', 'POSTN', 'PTCH1', 'R…
164	GO:BP	GO:0002376	immune system process	0.00017118	TRUE	"Any process involved in the development or functioning of the immune system, an organismal system for calibrated responses to potential internal or invasive threats." [GO_REF:0000022, GOC:add]	3438	168	61	18123	0.363095	0.0177429	FB1	['GO:0008150']	['ACKR3', 'ACKR4', 'ADM', 'APOD', 'AXL', 'C1R', 'C1S', 'C3', 'CD248', 'CD34', 'CD55', 'CD81', 'CFD', 'CFH', 'CLU', 'CRIP1', 'CST3', 'CTSK', 'CXCL12', 'CYB5R3', 'ECM1', 'FBN1', 'FTH1', 'FTL', 'GPNMB', 'GSN', 'GYPC', 'HSD3B7', 'IL6ST', 'ITM2A', 'JUND', 'LEPR', 'LGALS3', 'LRP1', 'MFAP4', 'MGST1', 'NBL1', 'NDRG1', 'NPC2', 'PDGFD', 'PPL', 'PRG4', 'RAB32', 'RAMP2', 'RBPJ', 'S100A11', 'S100A13', 'SDC2',…
165	GO:BP	GO:0050793	regulation of developmental process	0.000184571	TRUE	"Any process that modulates the frequency, rate or extent of development, the biological process whose specific outcome is the progression of a multicellular organism over time from an initial condition (e.g. a zygote, or a young adult) to a later condition (e.g. a multicellular animal or an aged adult)." [GOC:go_curators]	2621	168	51	18123	0.303571	0.0194582	FB1	['GO:0032502', 'GO:0050789']	['ABI3BP', 'ADM', 'AXL', 'C3', 'CD34', 'CST3', 'CTHRC1', 'CTSK', 'CXCL12', 'DBN1', 'DCN', 'ECM1', 'EFEMP1', 'FBLN1', 'FBN1', 'GPNMB', 'HSPG2', 'IGFBP5', 'IL6ST', 'ITGB1BP1', 'JUND', 'LGALS3', 'LRP1', 'LTBP4', 'MEDAG', 'MGP', 'NBL1', 'NTN4', 'NUPR1', 'OMD', 'OSR2', 'PI16', 'PTGIS', 'RAMP2', 'RBPJ', 'RNH1', 'S100A13', 'SDC2', 'SDCBP', 'SEMA3C', 'SERPINF1', 'SFRP2', 'SFRP4', 'TGFBR3', 'THBS2', 'TIMP…
166	GO:BP	GO:0007167	enzyme linked receptor protein signaling pathway	0.000194362	TRUE	"Any series of molecular signals initiated by the binding of an extracellular ligand to a receptor on the surface of the target cell, where the receptor possesses catalytic activity or is closely associated with an enzyme such as a protein kinase, and ending with regulation of a downstream cellular process, e.g. transcription." [GOC:mah, GOC:signaling, ISBN:0815316194]	1107	168	30	18123	0.178571	0.0271003	FB1	['GO:0007166']	['ANGPTL1', 'APOD', 'AXL', 'CHRDL1', 'DCN', 'EFEMP1', 'FBN1', 'FSTL1', 'GFRA1', 'IGFBP5', 'IGFBP6', 'IL6ST', 'LEPROT', 'LRP1', 'LTBP2', 'LTBP4', 'MMP2', 'NBL1', 'PDGFD', 'PDGFRB', 'PDGFRL', 'POLR2L', 'RBPJ', 'SDC2', 'SDCBP', 'SFRP2', 'SFRP4', 'TGFBR3', 'TXNIP', 'VASN']
167	GO:BP	GO:0008285	negative regulation of cell population proliferation	0.000203287	TRUE	"Any process that stops, prevents or reduces the rate or extent of cell proliferation." [GOC:go_curators]	804	168	25	18123	0.14881	0.0310945	FB1	['GO:0008283', 'GO:0042127', 'GO:0048523']	['ABI3BP', 'ACKR3', 'ADM', 'APOD', 'DPT', 'FBLN1', 'FTH1', 'GPNMB', 'IGFBP5', 'IGFBP6', 'IGFBP7', 'ITGB1BP1', 'NDRG1', 'NUPR1', 'PMP22', 'PODN', 'PTGES', 'RBPJ', 'S100A11', 'SERPINF1', 'SFRP2', 'SFRP4', 'SLIT3', 'TGFBR3', 'TIMP2']
168	GO:BP	GO:0050678	regulation of epithelial cell proliferation	0.000221524	TRUE	"Any process that modulates the frequency, rate or extent of epithelial cell proliferation." [GOC:ai]	401	92	13	18123	0.141304	0.032419	FB2	['GO:0042127', 'GO:0050673']	['CCND1', 'EDNRB', 'GPC3', 'HES1', 'HMGN1', 'MAGED1', 'MDK', 'MEF2C', 'PTCH1', 'SNAI2', 'SPARC', 'TNMD', 'WNT5A']
169	GO:BP	GO:0042127	regulation of cell population proliferation	0.000222788	TRUE	"Any process that modulates the frequency, rate or extent of cell proliferation." [GOC:jl]	1774	92	27	18123	0.293478	0.0152198	FB2	['GO:0008283', 'GO:0050794']	['CCND1', 'CLEC11A', 'EDNRB', 'F2R', 'GPC3', 'HES1', 'HEY2', 'HMGN1', 'IL11RA', 'INHBA', 'MAGED1', 'MARCKSL1', 'MDK', 'MEF2C', 'NAP1L1', 'NPM1', 'PTCH1', 'RBP4', 'SERPINE2', 'SNAI2', 'SOX4', 'SPARC', 'TMEM119', 'TNMD', 'TNN', 'WNT5A', 'WWTR1']
170	GO:BP	GO:1901360	organic cyclic compound metabolic process	0.000251534	TRUE	"The chemical reactions and pathways involving organic cyclic compound." [GOC:TermGenie]	6227	155	85	18123	0.548387	0.0136502	FB3	['GO:0071704']	['ADIRF', 'ALDOA', 'APOC1', 'APOE', 'ATF3', 'BMP4', 'BTG1', 'BTG2', 'CDKN1C', 'CHCHD10', 'CIRBP', 'CSRNP1', 'DDIT4', 'EGR1', 'EIF4A2', 'FBL', 'FGFR4', 'FOS', 'FOSB', 'GAPDH', 'GREM1', 'HES1', 'HEY1', 'HSP90AB1', 'IMPDH2', 'JUN', 'JUNB', 'KLF10', 'MAFF', 'MSC', 'MYC', 'MYF5', 'MYF6', 'NACA', 'NOTCH3', 'NPM1', 'NPPC', 'NUDT14', 'PAX7', 'PDK4', 'PITX2', 'RPL10', 'RPL10A', 'RPL12', 'RPL13', 'RPL15', …
171	GO:BP	GO:0019538	protein metabolic process	0.00026564	TRUE	"The chemical reactions and pathways involving a protein. Includes protein modification." [GOC:ma]	5912	155	82	18123	0.529032	0.0138701	FB3	['GO:0043170', 'GO:0044238', 'GO:1901564']	['APOC1', 'APOE', 'ATF3', 'BMP4', 'BST2', 'BTG1', 'BTG2', 'CCL2', 'CDKN1C', 'CIRBP', 'CXCR4', 'DAG1', 'DDIT4', 'EEF2', 'EGR1', 'EIF3L', 'EIF4A2', 'FBL', 'FGFR4', 'GADD45B', 'GAPDH', 'GREM1', 'HES1', 'HSP90AB1', 'KLHL41', 'MIR24-2', 'MYC', 'NACA', 'NPM1', 'NUDT14', 'PDK4', 'PPP1R14B', 'PTPRE', 'RPL10', 'RPL10A', 'RPL12', 'RPL13', 'RPL15', 'RPL17', 'RPL18', 'RPL21', 'RPL23A', 'RPL24', 'RPL26', 'RPL…
172	GO:BP	GO:0001655	urogenital system development	0.000275906	TRUE	"The process whose specific outcome is the progression of the urogenital system over time, from its formation to the mature structure." [GOC:go_curators]	339	92	12	18123	0.130435	0.0353982	FB2	['GO:0048731']	['COL4A1', 'GPC3', 'HES1', 'ID3', 'MAGED1', 'MEF2C', 'PTCH1', 'RBP4', 'ROBO2', 'SOX4', 'WNT5A', 'WWTR1']
173	GO:BP	GO:0040011	locomotion	0.000296938	TRUE	"Self-propelled movement of a cell or organism from one location to another." [GOC:dgh]	2039	168	43	18123	0.255952	0.0210888	FB1	['GO:0008150']	['ACKR3', 'ACKR4', 'AKAP12', 'APOD', 'AXL', 'CD248', 'CD34', 'CD81', 'CTHRC1', 'CXCL12', 'DCN', 'ECM1', 'FBLN1', 'FSTL1', 'GFRA1', 'GPNMB', 'GYPC', 'HSD3B7', 'IGFBP5', 'IGFBP6', 'ITGB1BP1', 'LGALS3', 'LIMA1', 'LRP1', 'NBL1', 'NTN4', 'PDGFD', 'PDGFRB', 'PLTP', 'PODN', 'S100A11', 'SDC2', 'SDCBP', 'SEMA3C', 'SERPINF1', 'SFRP2', 'SLIT3', 'SPOCK1', 'TGFBR3', 'TIMP1', 'TMSB4X', 'TNFAIP6', 'XG']
174	GO:BP	GO:1901700	response to oxygen-containing compound	0.000312344	TRUE	"Any process that results in a change in state or activity of a cell or an organism (in terms of movement, secretion, enzyme production, gene expression, etc.) as a result of an oxygen-containing compound stimulus." [GOC:pr, GOC:TermGenie]	1748	168	39	18123	0.232143	0.0223112	FB1	['GO:0042221']	['ADM', 'AKAP12', 'AKR1C1', 'AKR1C2', 'AKR1C3', 'APOD', 'AXL', 'CD55', 'CLU', 'CXCL12', 'DCN', 'FBLN5', 'FBN1', 'FIBIN', 'GPX3', 'GPX4', 'GSN', 'IGFBP5', 'IGFBP7', 'JUND', 'LEPROT', 'LRP1', 'LY6E', 'MAN1A1', 'MGST1', 'MMP2', 'PAM', 'PDGFD', 'PDGFRB', 'PTGES', 'RAMP2', 'SERPINF1', 'SLIT3', 'SLPI', 'SOD3', 'TFPI', 'TGFBR3', 'TIMP1', 'TXNIP']
175	GO:BP	GO:0003205	cardiac chamber development	0.000318357	TRUE	"The progression of a cardiac chamber over time, from its formation to the mature structure. A cardiac chamber is an enclosed cavity within the heart." [GOC:mtg_heart]	166	92	9	18123	0.0978261	0.0542169	FB2	['GO:0007507', 'GO:0048856']	['COL11A1', 'HES1', 'HEY2', 'LMO4', 'MEF2C', 'RBP4', 'ROBO2', 'SOX4', 'WNT5A']
176	GO:BP	GO:0048771	tissue remodeling	0.000342305	TRUE	"The reorganization or renovation of existing tissues. This process can either change the characteristics of a tissue such as in blood vessel remodeling, or result in the dynamic equilibrium of a tissue such as in bone remodeling." [GOC:ebc]	187	168	12	18123	0.0714286	0.0641711	FB1	['GO:0032501']	['ABI3BP', 'AXL', 'CST3', 'CTHRC1', 'CTSK', 'GPNMB', 'IGFBP5', 'LEPR', 'MMP2', 'RBPJ', 'SEMA3C', 'TIMP1']
177	GO:BP	GO:0048699	generation of neurons	0.000346588	TRUE	"The process in which nerve cells are generated. This includes the production of neuroblasts and their differentiation into neurons." [GOC:nln]	1576	92	25	18123	0.271739	0.0158629	FB2	['GO:0022008']	['CDH11', 'COL3A1', 'EDNRB', 'HES1', 'HEY2', 'ID3', 'INHBA', 'LMO4', 'MDK', 'MEF2C', 'NAP1L1', 'NOTCH3', 'PALLD', 'PLK2', 'POSTN', 'PTCH1', 'RAB13', 'ROBO2', 'SERPINE2', 'SOX4', 'STMN1', 'STMN2', 'TNN', 'VIM', 'WNT5A']
178	GO:BP	GO:0010466	negative regulation of peptidase activity	0.000352152	TRUE	"Any process that stops or reduces the rate of peptidase activity, the hydrolysis of peptide bonds within proteins." [GOC:dph, GOC:tb]	265	168	14	18123	0.0833333	0.0528302	FB1	['GO:0045861', 'GO:0051346', 'GO:0052547']	['C3', 'CST3', 'ECM1', 'LRP1', 'PI16', 'SERPINF1', 'SERPING1', 'SFRP2', 'SLPI', 'SPOCK1', 'TFPI', 'TIMP1', 'TIMP2', 'TIMP3']
179	GO:BP	GO:0050789	regulation of biological process	0.00036508	TRUE	"Any process that modulates the frequency, rate or extent of a biological process. Biological processes are regulated by many means; examples include the control of gene expression, protein modification or interaction with a protein or substrate molecule." [GOC:ai, GOC:go_curators]	12122	155	132	18123	0.851613	0.0108893	FB3	['GO:0008150', 'GO:0065007']	['ADIRF', 'ALDH1A1', 'ALDOA', 'ANGPTL4', 'APOC1', 'APOE', 'ATF3', 'BMP4', 'BST2', 'BTG1', 'BTG2', 'CCL2', 'CDH15', 'CDKN1C', 'CHCHD10', 'CHODL', 'CHRNA1', 'CIRBP', 'CLDN5', 'COL18A1', 'CRIP2', 'CSRNP1', 'CXCR4', 'DAG1', 'DDIT4', 'DES', 'DLK1', 'EEF2', 'EGR1', 'EIF4A2', 'FABP5', 'FGFR4', 'FOS', 'FOSB', 'FRZB', 'FXYD6', 'GADD45B', 'GAPDH', 'GPM6B', 'GREM1', 'HES1', 'HEY1', 'HLA-E', 'HSP90AB1', 'IL3…
180	GO:BP	GO:0006915	apoptotic process	0.000382066	TRUE	"A programmed cell death process which begins when a cell receives an internal (e.g. DNA damage) or external signal (e.g. an extracellular death ligand), and proceeds through a series of biochemical events (signaling pathway phase) which trigger an execution phase. The execution phase is the last step of an apoptotic process, and is typically characterized by rounding-up of the cell, retraction o…	1998	155	40	18123	0.258065	0.02002	FB3	['GO:0012501']	['ANGPTL4', 'APOE', 'ATF3', 'BMP4', 'BTG1', 'BTG2', 'CCL2', 'CHCHD10', 'CSRNP1', 'CXCR4', 'DDIT4', 'EGR1', 'FRZB', 'GADD45B', 'GAPDH', 'GREM1', 'HSP90AB1', 'JUN', 'MAL', 'MIR24-2', 'MYC', 'NACA', 'NET1', 'NPM1', 'PAX7', 'PDK4', 'PEG10', 'RAPSN', 'RPL10', 'RPL26', 'RPS27A', 'RPS3', 'RPS3A', 'RPS6', 'RSL1D1', 'SIRT2', 'SLC25A6', 'SOCS3', 'TPD52L1', 'ZFP36']
181	GO:BP	GO:0044085	cellular component biogenesis	0.000386752	TRUE	"A process that results in the biosynthesis of constituent macromolecules, assembly, and arrangement of constituent parts of a cellular component. Includes biosynthesis of constituent macromolecules, and those macromolecular modifications that are involved in synthesis or assembly of the cellular component." [GOC:jl, GOC:mah]	3377	155	56	18123	0.36129	0.0165828	FB3	['GO:0071840']	['ALDOA', 'APOC1', 'APOE', 'CHCHD10', 'CIRBP', 'CLDN5', 'DAG1', 'EIF3L', 'FBL', 'GPM6B', 'GREM1', 'HES1', 'HSP90AB1', 'KLHL41', 'MAT2A', 'MYC', 'NPM1', 'RPL10', 'RPL10A', 'RPL12', 'RPL13', 'RPL15', 'RPL17', 'RPL18', 'RPL21', 'RPL23A', 'RPL24', 'RPL26', 'RPL3', 'RPL32', 'RPL34', 'RPL36A', 'RPL4', 'RPL41', 'RPL5', 'RPL6', 'RPL7', 'RPL7A', 'RPL8', 'RPL9', 'RPLP0', 'RPS10', 'RPS19', 'RPS2', 'RPS27A',…
182	GO:BP	GO:0003206	cardiac chamber morphogenesis	0.000397879	TRUE	"The process in which a cardiac chamber is generated and organized. A cardiac chamber is an enclosed cavity within the heart." [GOC:mtg_heart]	123	92	8	18123	0.0869565	0.0650407	FB2	['GO:0003007', 'GO:0003205', 'GO:0009653']	['COL11A1', 'HES1', 'HEY2', 'MEF2C', 'RBP4', 'ROBO2', 'SOX4', 'WNT5A']
183	GO:BP	GO:0045861	negative regulation of proteolysis	0.000415364	TRUE	"Any process that stops, prevents, or reduces the frequency, rate or extent of the hydrolysis of a peptide bond or bonds within a protein." [GOC:go_curators]	356	168	16	18123	0.0952381	0.0449438	FB1	['GO:0006508', 'GO:0030162', 'GO:0032269']	['C3', 'CST3', 'ECM1', 'GAS1', 'LRP1', 'PI16', 'SDCBP', 'SERPINF1', 'SERPING1', 'SFRP2', 'SLPI', 'SPOCK1', 'TFPI', 'TIMP1', 'TIMP2', 'TIMP3']
184	GO:BP	GO:0042274	ribosomal small subunit biogenesis	0.000446389	TRUE	"A cellular process that results in the biosynthesis of constituent macromolecules, assembly, and arrangement of constituent parts of a small ribosomal subunit; includes transport to the sites of protein synthesis." [GOC:jl]	74	155	8	18123	0.0516129	0.108108	FB3	['GO:0022613', 'GO:0042254']	['NPM1', 'RPS10', 'RPS19', 'RPS28', 'RPS5', 'RPS6', 'RPS8', 'RPSA']
185	GO:BP	GO:0003231	cardiac ventricle development	0.000450665	TRUE	"The process whose specific outcome is the progression of a cardiac ventricle over time, from its formation to the mature structure. A cardiac ventricle receives blood from a cardiac atrium and pumps it out of the heart." [GOC:mtg_heart]	125	92	8	18123	0.0869565	0.064	FB2	['GO:0003205']	['COL11A1', 'HES1', 'HEY2', 'LMO4', 'MEF2C', 'ROBO2', 'SOX4', 'WNT5A']
186	GO:BP	GO:0051239	regulation of multicellular organismal process	0.000454801	TRUE	"Any process that modulates the frequency, rate or extent of a multicellular organismal process, the processes pertinent to the function of a multicellular organism above the cellular level; includes the integrated processes of tissues and organs." [GOC:ai, GOC:dph, GOC:tb]	2888	92	35	18123	0.380435	0.0121191	FB2	['GO:0032501', 'GO:0050789']	['ADAMTS18', 'ASPN', 'CCND1', 'COL1A1', 'COL4A2', 'CREB3L1', 'EDNRB', 'ENPP2', 'F2R', 'HES1', 'HEY2', 'INHBA', 'KRT17', 'LUM', 'MAGED1', 'MDK', 'MEF2C', 'MFAP2', 'MYL4', 'NAP1L1', 'PLK2', 'POSTN', 'PTCH1', 'PTGER3', 'RBP4', 'ROBO2', 'SERPINE2', 'SNAI2', 'SOX4', 'SPARC', 'TMEM119', 'TNMD', 'TRPS1', 'WNT5A', 'WWTR1']
187	GO:BP	GO:0007399	nervous system development	0.000485526	TRUE	"The process whose specific outcome is the progression of nervous tissue over time, from its formation to its mature state." [GOC:dgh]	2484	92	32	18123	0.347826	0.0128824	FB2	['GO:0048731']	['CDH11', 'COL3A1', 'COL4A1', 'EDNRA', 'EDNRB', 'HAPLN1', 'HES1', 'HEY2', 'ID3', 'INHBA', 'LAMC3', 'LMO4', 'MARCKSL1', 'MDK', 'MEF2C', 'NAP1L1', 'NOTCH3', 'PALLD', 'PLK2', 'POSTN', 'PTCH1', 'RAB13', 'ROBO2', 'SERPINE2', 'SOX4', 'STMN1', 'STMN2', 'TNN', 'VCAN', 'VIM', 'WNT5A', 'WWTR1']
188	GO:BP	GO:0035239	tube morphogenesis	0.000499629	TRUE	"The process in which the anatomical structures of a tube are generated and organized. Epithelial and endothelial tubes transport gases, liquids and cells from one site to another and form the basic structure of many organs and tissues, with tube shape and organization varying from the single-celled excretory organ in Caenorhabditis elegans to the branching trees of the mammalian kidney and insec…	956	92	19	18123	0.206522	0.0198745	FB2	['GO:0009653', 'GO:0035295']	['CALD1', 'COL4A1', 'COL4A2', 'CREB3L1', 'EDNRA', 'ENPP2', 'GPC3', 'HES1', 'HEY2', 'LMO4', 'MAGED1', 'MDK', 'MEF2C', 'PLK2', 'PTCH1', 'SOX4', 'SPARC', 'TNMD', 'WNT5A']
189	GO:BP	GO:0002274	myeloid leukocyte activation	0.000522746	TRUE	"A change in the morphology or behavior of a myeloid leukocyte resulting from exposure to an activating factor such as a cellular or soluble ligand." [GOC:add, ISBN:0781735149]	671	168	22	18123	0.130952	0.0327869	FB1	['GO:0045321']	['C3', 'CD55', 'CFD', 'CLU', 'CST3', 'CYB5R3', 'FTH1', 'FTL', 'GSN', 'JUND', 'LGALS3', 'MGST1', 'NDRG1', 'NPC2', 'RBPJ', 'S100A11', 'S100A13', 'SDCBP', 'SLPI', 'TIMP2', 'TNFAIP6', 'VAT1']
190	GO:BP	GO:0048519	negative regulation of biological process	0.000560032	TRUE	"Any process that stops, prevents, or reduces the frequency, rate or extent of a biological process. Biological processes are regulated by many means; examples include the control of gene expression, protein modification or interaction with a protein or substrate molecule." [GOC:jid]	5861	168	86	18123	0.511905	0.0146733	FB1	['GO:0008150', 'GO:0050789']	['ABI3BP', 'ACKR3', 'ADD3', 'ADM', 'AEBP1', 'AKR1C3', 'ANK2', 'APOD', 'AXL', 'C3', 'CD34', 'CD55', 'CHRDL1', 'CLU', 'CST3', 'CTHRC1', 'CTSK', 'CXCL12', 'DCN', 'DPT', 'ECM1', 'EFEMP1', 'FBLN1', 'FBN1', 'FSTL1', 'FTH1', 'GAS1', 'GPNMB', 'GPX4', 'GSN', 'H2AFJ', 'HSPG2', 'IGFBP5', 'IGFBP6', 'IGFBP7', 'IL6ST', 'ITGB1BP1', 'ITM2A', 'ITM2B', 'LEPR', 'LEPROT', 'LGALS3', 'LIMA1', 'LRP1', 'LY6E', 'NBL1', '…
191	GO:BP	GO:0071840	cellular component organization or biogenesis	0.000563603	TRUE	"A process that results in the biosynthesis of constituent macromolecules, assembly, arrangement of constituent parts, or disassembly of a cellular component." [GOC:mah]	6880	155	90	18123	0.580645	0.0130814	FB3	['GO:0009987']	['ALDOA', 'APOC1', 'APOE', 'BMP4', 'BST2', 'BTG1', 'BTG2', 'CADM2', 'CCL2', 'CDH15', 'CHCHD10', 'CHODL', 'CHRNA1', 'CIRBP', 'CLDN5', 'CNN3', 'COL18A1', 'CXCR4', 'DAG1', 'DDIT4', 'DES', 'EIF3L', 'FBL', 'FGFR4', 'FRZB', 'GAPDH', 'GPM6B', 'GREM1', 'HES1', 'HMGN2', 'HSP90AB1', 'JUN', 'KLHL41', 'MAL', 'MAT2A', 'MYC', 'MYF5', 'NET1', 'NOTCH3', 'NPM1', 'PDLIM3', 'PDLIM4', 'RAPSN', 'RPL10', 'RPL10A', 'RP…
192	GO:BP	GO:0060485	mesenchyme development	0.000585868	TRUE	"The process whose specific outcome is the progression of a mesenchymal tissue over time, from its formation to the mature structure. A mesenchymal tissue is made up of loosely packed stellate cells." [GOC:dph]	296	92	11	18123	0.119565	0.0371622	FB2	['GO:0009888', 'GO:0048513']	['COL1A1', 'EDNRA', 'EDNRB', 'HES1', 'HEY2', 'MDK', 'MEF2C', 'ROBO2', 'SNAI2', 'WNT5A', 'WWTR1']
193	GO:BP	GO:0051241	negative regulation of multicellular organismal process	0.000603522	TRUE	"Any process that stops, prevents, or reduces the frequency, rate or extent of an organismal process, the processes pertinent to the function of an organism above the cellular level; includes the integrated processes of tissues and organs." [GOC:ai]	1174	92	21	18123	0.228261	0.0178876	FB2	['GO:0032501', 'GO:0048519', 'GO:0051239']	['ADAMTS18', 'ASPN', 'COL4A2', 'CREB3L1', 'F2R', 'HES1', 'HEY2', 'INHBA', 'MDK', 'MEF2C', 'PLK2', 'PTCH1', 'PTGER3', 'RBP4', 'ROBO2', 'SERPINE2', 'SNAI2', 'SPARC', 'TMEM119', 'TNMD', 'WNT5A']
194	GO:BP	GO:0071840	cellular component organization or biogenesis	0.000604937	TRUE	"A process that results in the biosynthesis of constituent macromolecules, assembly, arrangement of constituent parts, or disassembly of a cellular component." [GOC:mah]	6880	92	59	18123	0.641304	0.00857558	FB2	['GO:0009987']	['ADAMTS18', 'BGN', 'CALD1', 'CDH11', 'CENPW', 'COL11A1', 'COL1A1', 'COL1A2', 'COL21A1', 'COL3A1', 'COL4A1', 'COL4A2', 'COL5A2', 'COL6A1', 'COL6A3', 'CREB3L1', 'ENPP2', 'F2R', 'FSCN1', 'GEM', 'GPC3', 'HAPLN1', 'HES1', 'HEY2', 'HMGN1', 'HNRNPA1', 'INHBA', 'KRT16', 'KRT17', 'LAMC3', 'LMO4', 'LUM', 'MARCKSL1', 'MDK', 'MEF2C', 'MFAP2', 'NAP1L1', 'NOTCH3', 'NPM1', 'PALLD', 'PLK2', 'POSTN', 'PTCH1', 'R…
195	GO:BP	GO:0009888	tissue development	0.000615994	TRUE	"The process whose specific outcome is the progression of a tissue over time, from its formation to the mature structure." [ISBN:0471245208]	2093	168	43	18123	0.255952	0.0205447	FB1	['GO:0048856']	['ADM', 'AKR1C1', 'AKR1C2', 'AKR1C3', 'C3', 'CD34', 'CLEC3B', 'COL12A1', 'CRIP1', 'CTHRC1', 'CTSK', 'DCN', 'ECM1', 'EFEMP1', 'ELN', 'FSTL1', 'GPNMB', 'HSPG2', 'IGFBP5', 'IL6ST', 'ITGB1BP1', 'LGALS3', 'LY6E', 'MGP', 'MMP2', 'NTN4', 'NUPR1', 'OMD', 'OSR2', 'PDGFD', 'PDGFRB', 'PI16', 'PPL', 'RBPJ', 'SDCBP', 'SEMA3C', 'SFRP2', 'SFRP4', 'TGFBR3', 'TIMP1', 'TPPP3', 'TXNIP', 'VASN']
196	GO:BP	GO:0007166	cell surface receptor signaling pathway	0.000700653	TRUE	"A series of molecular signals initiated by activation of a receptor on the surface of a cell. The pathway begins with binding of an extracellular ligand to a cell surface receptor, or for receptors that signal in the absence of a ligand, by ligand-withdrawal or the activity of a constitutively active receptor. The pathway ends with regulation of a downstream cellular process, e.g. transcription.…	3226	92	37	18123	0.402174	0.0114693	FB2	['GO:0007165']	['ADAMTS18', 'ASPN', 'CCND1', 'COL1A1', 'COL1A2', 'COL3A1', 'COL4A1', 'COL4A2', 'CREB3L1', 'DKK3', 'EDNRB', 'ENHO', 'F2R', 'FSCN1', 'GEM', 'GPC3', 'HES1', 'HEY2', 'HNRNPA1', 'IL11RA', 'INHBA', 'MDK', 'MEF2C', 'NOTCH3', 'POSTN', 'PTCH1', 'RAB34', 'ROBO2', 'SERPINE2', 'SNAI2', 'SOX4', 'STMN1', 'TNMD', 'TNN', 'VIM', 'WNT5A', 'WWTR1']
197	GO:BP	GO:0048762	mesenchymal cell differentiation	0.000709633	TRUE	"The process in which a relatively unspecialized cell acquires specialized features of a mesenchymal cell. A mesenchymal cell is a loosely associated cell that is part of the connective tissue in an organism. Mesenchymal cells give rise to more mature connective tissue cell types." [GOC:dph, GOC:jid]	239	92	10	18123	0.108696	0.041841	FB2	['GO:0030154', 'GO:0060485']	['COL1A1', 'EDNRA', 'EDNRB', 'HES1', 'HEY2', 'MDK', 'MEF2C', 'SNAI2', 'WNT5A', 'WWTR1']
198	GO:BP	GO:0097435	supramolecular fiber organization	0.000770286	TRUE	"A process that is carried out at the cellular level which results in the assembly, arrangement of constituent parts, or disassembly of a supramolecular fiber, a polymer consisting of an indefinite number of protein or protein complex subunits that have polymerised to form a fiber-shaped structure." [GOC:pr]	863	168	25	18123	0.14881	0.0289687	FB1	['GO:0016043']	['ADD3', 'AEBP1', 'CLU', 'COL12A1', 'COL14A1', 'CST3', 'CXCL12', 'DBN1', 'DPT', 'ELN', 'FBLN5', 'GAS7', 'GSN', 'HSPG2', 'ITGB1BP1', 'ITM2B', 'LIMA1', 'LTBP2', 'LTBP4', 'MFAP4', 'PDGFRB', 'SFRP2', 'TMSB4X', 'TNXB', 'TPPP3']
199	GO:BP	GO:2000026	regulation of multicellular organismal development	0.000864842	TRUE	"Any process that modulates the frequency, rate or extent of multicellular organismal development." [GOC:obol]	1459	168	34	18123	0.202381	0.0233036	FB1	['GO:0007275', 'GO:0050793', 'GO:0051239']	['ADM', 'AXL', 'C3', 'CD34', 'CTSK', 'CXCL12', 'DBN1', 'DCN', 'ECM1', 'EFEMP1', 'FBN1', 'GPNMB', 'HSPG2', 'IL6ST', 'LGALS3', 'LRP1', 'MGP', 'NUPR1', 'OMD', 'OSR2', 'PI16', 'PTGIS', 'RAMP2', 'RBPJ', 'RNH1', 'SEMA3C', 'SERPINF1', 'SFRP2', 'SFRP4', 'TGFBR3', 'THBS2', 'TMEM176A', 'TMEM176B', 'YWHAH']
200	GO:BP	GO:0000028	ribosomal small subunit assembly	0.000905601	TRUE	"The aggregation, arrangement and bonding together of constituent RNAs and proteins to form the small ribosomal subunit." [GOC:jl]	19	155	5	18123	0.0322581	0.263158	FB3	['GO:0022618', 'GO:0042255', 'GO:0042274']	['RPS10', 'RPS19', 'RPS28', 'RPS5', 'RPSA']
201	GO:BP	GO:0016477	cell migration	0.00092782	TRUE	"The controlled self-propelled movement of a cell from one site to a destination guided by molecular cues. Cell migration is a central process in the development and maintenance of multicellular organisms." [GOC:cjm, GOC:dph, GOC:ems, GOC:pf, Wikipedia:Cell_migration]	1660	92	25	18123	0.271739	0.0150602	FB2	['GO:0048870']	['COL1A1', 'COL1A2', 'COL3A1', 'DPEP1', 'EDNRB', 'ENPP2', 'F2R', 'FSCN1', 'GPC3', 'HES1', 'KRT16', 'LAMC3', 'LMO4', 'MDK', 'MEF2C', 'PALLD', 'PLK2', 'POSTN', 'RAB13', 'SERPINE2', 'SNAI2', 'SPARC', 'TNN', 'VCAN', 'WNT5A']
202	GO:BP	GO:0035910	ascending aorta morphogenesis	0.000970303	TRUE	"The process in which the anatomical structures of the ascending aorta are generated and organized. The ascending aorta is the portion of the aorta in a two-pass circulatory system that lies between the heart and the arch of aorta. In a two-pass circulatory system blood passes twice through the heart to supply the body once." [GOC:bf, GOC:dgh, MA:0002570, UBERON:0001496, Wikipedia:Ascending_aorta]	4	92	3	18123	0.0326087	0.75	FB2	['GO:0009653', 'GO:0035905', 'GO:0035909']	['HES1', 'HEY2', 'SOX4']
203	GO:BP	GO:0030162	regulation of proteolysis	0.00101639	TRUE	"Any process that modulates the frequency, rate or extent of the hydrolysis of a peptide bond or bonds within a protein." [GOC:mah]	756	168	23	18123	0.136905	0.0304233	FB1	['GO:0006508', 'GO:0051246']	['C3', 'CLEC3B', 'CLU', 'CST3', 'ECM1', 'FBLN1', 'GAS1', 'GSN', 'LRP1', 'LTBP4', 'NUPR1', 'PCOLCE2', 'PI16', 'SDCBP', 'SERPINF1', 'SERPING1', 'SFRP2', 'SLPI', 'SPOCK1', 'TFPI', 'TIMP1', 'TIMP2', 'TIMP3']
204	GO:BP	GO:0040011	locomotion	0.0010233	TRUE	"Self-propelled movement of a cell or organism from one location to another." [GOC:dgh]	2039	92	28	18123	0.304348	0.0137322	FB2	['GO:0008150']	['COL1A1', 'COL1A2', 'COL3A1', 'DPEP1', 'EDNRB', 'ENPP2', 'F2R', 'FSCN1', 'GPC3', 'HES1', 'KRT16', 'LAMC3', 'LMO4', 'MDK', 'MEF2C', 'NOTCH3', 'PALLD', 'PLK2', 'POSTN', 'PTCH1', 'RAB13', 'ROBO2', 'SERPINE2', 'SNAI2', 'SPARC', 'TNN', 'VCAN', 'WNT5A']
205	GO:BP	GO:0034248	regulation of cellular amide metabolic process	0.00102708	TRUE	"Any process that modulates the frequency, rate or extent of the chemical reactions and pathways involving amides." [GOC:mah]	577	155	19	18123	0.122581	0.0329289	FB3	['GO:0031323', 'GO:0043603', 'GO:0051171']	['APOE', 'ATF3', 'BTG2', 'CIRBP', 'EEF2', 'EIF4A2', 'GAPDH', 'MIR24-2', 'MYC', 'NPM1', 'PDK4', 'RPL10', 'RPL26', 'RPL5', 'RPS3', 'RPS4X', 'RPS9', 'RTN2', 'ZFP36']
206	GO:BP	GO:0030855	epithelial cell differentiation	0.00105659	TRUE	"The process in which a relatively unspecialized cell acquires specialized features of an epithelial cell, any of the cells making up an epithelium." [GOC:ecd, PMID:11839751]	807	92	17	18123	0.184783	0.0210657	FB2	['GO:0030154', 'GO:0060429']	['CCND1', 'COL4A1', 'HES1', 'HEY2', 'ID3', 'KRT16', 'KRT17', 'MEF2C', 'PALLD', 'PTCH1', 'RAB13', 'SOX4', 'TAGLN', 'TNMD', 'VIM', 'WNT5A', 'WWTR1']
207	GO:BP	GO:0050673	epithelial cell proliferation	0.00106224	TRUE	"The multiplication or reproduction of epithelial cells, resulting in the expansion of a cell population. Epithelial cells make up the epithelium, the covering of internal and external surfaces of the body, including the lining of vessels and other small cavities. It consists of cells joined by small amounts of cementing substances." [ISBN:0721662544]	460	92	13	18123	0.141304	0.0282609	FB2	['GO:0008283']	['CCND1', 'EDNRB', 'GPC3', 'HES1', 'HMGN1', 'MAGED1', 'MDK', 'MEF2C', 'PTCH1', 'SNAI2', 'SPARC', 'TNMD', 'WNT5A']
208	GO:BP	GO:0061326	renal tubule development	0.00117478	TRUE	"The progression of the renal tubule over time from its formation to the mature form. A renal tubule is a tube that filters, re-absorbs and secretes substances to rid an organism of waste and to play a role in fluid homeostasis." [GOC:dph, GOC:mtg_kidney_jan10]	97	92	7	18123	0.076087	0.0721649	FB2	['GO:0035295', 'GO:0060429', 'GO:0072001']	['COL4A1', 'GPC3', 'HES1', 'MAGED1', 'MEF2C', 'PTCH1', 'WWTR1']
209	GO:BP	GO:0008283	cell population proliferation	0.00122464	TRUE	"The multiplication or reproduction of cells, resulting in the expansion of a cell population." [GOC:mah, GOC:mb]	2057	92	28	18123	0.304348	0.0136121	FB2	['GO:0009987']	['CCND1', 'CLEC11A', 'EDNRA', 'EDNRB', 'F2R', 'GPC3', 'HES1', 'HEY2', 'HMGN1', 'IL11RA', 'INHBA', 'MAGED1', 'MARCKSL1', 'MDK', 'MEF2C', 'NAP1L1', 'NPM1', 'PTCH1', 'RBP4', 'SERPINE2', 'SNAI2', 'SOX4', 'SPARC', 'TMEM119', 'TNMD', 'TNN', 'WNT5A', 'WWTR1']
210	GO:BP	GO:0048646	anatomical structure formation involved in morphogenesis	0.00127905	TRUE	"The developmental process pertaining to the initial formation of an anatomical structure from unspecified parts. This process begins with the specific processes that contribute to the appearance of the discrete structure and ends when the structural rudiment is recognizable. An anatomical structure is any biological entity that occupies space and is distinguished from its surroundings. Anatomica…	1209	168	30	18123	0.178571	0.0248139	FB1	['GO:0009653', 'GO:0032502']	['ACKR3', 'ADM', 'ANGPTL1', 'ANGPTL2', 'ANK2', 'APOD', 'C3', 'CD34', 'CD81', 'COL12A1', 'CTHRC1', 'DCN', 'ECM1', 'GPNMB', 'HSPG2', 'ITGB1BP1', 'LEPR', 'MMP2', 'PDGFRB', 'PMP22', 'PTGIS', 'RAMP2', 'RBPJ', 'RNH1', 'SEMA3C', 'SERPINF1', 'SFRP2', 'TGFBR3', 'THBS2', 'TNFAIP2']
211	GO:BP	GO:0003007	heart morphogenesis	0.00128522	TRUE	"The developmental process in which the heart is generated and organized. The heart is a hollow, muscular organ, which, by contracting rhythmically, keeps up the circulation of the blood." [GOC:dph, GOC:isa_complete]	255	92	10	18123	0.108696	0.0392157	FB2	['GO:0007507', 'GO:0009887']	['COL11A1', 'HES1', 'HEY2', 'MEF2C', 'PTCH1', 'RBP4', 'ROBO2', 'SNAI2', 'SOX4', 'WNT5A']
212	GO:BP	GO:0010557	positive regulation of macromolecule biosynthetic process	0.00145594	TRUE	"Any process that increases the rate, frequency or extent of the chemical reactions and pathways resulting in the formation of a macromolecule, any molecule of high relative molecular mass, the structure of which essentially comprises the multiple repetition of units derived, actually or conceptually, from molecules of low relative molecular mass." [GOC:dph, GOC:tb]	1859	155	37	18123	0.23871	0.0199032	FB3	['GO:0009059', 'GO:0009891', 'GO:0010556', 'GO:0010604']	['ADIRF', 'APOE', 'ATF3', 'BMP4', 'CCL2', 'CDKN1C', 'CHCHD10', 'CIRBP', 'CSRNP1', 'EEF2', 'EGR1', 'FGFR4', 'FOS', 'FOSB', 'GREM1', 'HES1', 'HEY1', 'HSP90AB1', 'JUN', 'JUNB', 'KLF10', 'MAFF', 'MYC', 'MYF5', 'MYF6', 'NACA', 'NOTCH3', 'NPM1', 'PITX2', 'RPL26', 'RPL5', 'RPS27A', 'RPS4X', 'RPS9', 'RXRG', 'SERTAD1', 'SIRT2']
213	GO:BP	GO:0035239	tube morphogenesis	0.00146067	TRUE	"The process in which the anatomical structures of a tube are generated and organized. Epithelial and endothelial tubes transport gases, liquids and cells from one site to another and form the basic structure of many organs and tissues, with tube shape and organization varying from the single-celled excretory organ in Caenorhabditis elegans to the branching trees of the mammalian kidney and insec…	956	168	26	18123	0.154762	0.0271967	FB1	['GO:0009653', 'GO:0035295']	['ACKR3', 'ADM', 'ANGPTL1', 'ANGPTL2', 'APOD', 'C3', 'CD34', 'CTHRC1', 'DCN', 'ECM1', 'GPNMB', 'HSPG2', 'ITGB1BP1', 'LEPR', 'LRP1', 'MMP2', 'PDGFRB', 'PTGIS', 'RAMP2', 'RBPJ', 'RNH1', 'SERPINF1', 'SFRP2', 'TGFBR3', 'THBS2', 'TNFAIP2']
214	GO:BP	GO:0071495	cellular response to endogenous stimulus	0.00150882	TRUE	"Any process that results in a change in state or activity of a cell (in terms of movement, secretion, enzyme production, gene expression, etc.) as a result of a stimulus arising within the organism." [GOC:mah]	1467	92	23	18123	0.25	0.0156783	FB2	['GO:0009719']	['ASPN', 'COL1A1', 'COL1A2', 'COL3A1', 'COL4A1', 'COL4A2', 'COL5A2', 'COL6A1', 'CREB3L1', 'DKK3', 'GPC3', 'HES1', 'HNRNPA1', 'INHBA', 'MEF2C', 'POSTN', 'RAB13', 'ROBO2', 'SNAI2', 'STMN2', 'TNMD', 'VIM', 'WNT5A']
215	GO:BP	GO:0006928	movement of cell or subcellular component	0.00151563	TRUE	"The directed, self-propelled movement of a cell or subcellular component without the involvement of an external agent such as a transporter or a pore." [GOC:dgh, GOC:dph, GOC:jl, GOC:mlg]	2319	168	45	18123	0.267857	0.0194049	FB1	['GO:0009987']	['ACKR3', 'ACKR4', 'AKAP12', 'ANK2', 'APOD', 'AXL', 'CD248', 'CD34', 'CD81', 'CTHRC1', 'CXCL12', 'DCN', 'ECM1', 'FBLN1', 'FSTL1', 'GFRA1', 'GPNMB', 'GSN', 'GYPC', 'HSD3B7', 'IGFBP5', 'IGFBP6', 'ITGB1BP1', 'LGALS3', 'LIMA1', 'LRP1', 'NBL1', 'NTN4', 'PDGFD', 'PDGFRB', 'PLTP', 'PODN', 'S100A11', 'SDC2', 'SDCBP', 'SEMA3C', 'SERPINF1', 'SFRP2', 'SLIT3', 'SPOCK1', 'TGFBR3', 'TIMP1', 'TMSB4X', 'TNFAIP6'…
216	GO:BP	GO:0035295	tube development	0.00168149	TRUE	"The process whose specific outcome is the progression of a tube over time, from its initial formation to a mature structure. Epithelial and endothelial tubes transport gases, liquids and cells from one site to another and form the basic structure of many organs and tissues including lung and trachea, kidney, the mammary gland, the vascular system and the gastrointestinal and urinary-genital trac…	1158	168	29	18123	0.172619	0.0250432	FB1	['GO:0007275', 'GO:0048856']	['ACKR3', 'ADM', 'ANGPTL1', 'ANGPTL2', 'APOD', 'C3', 'CD34', 'CTHRC1', 'DCN', 'ECM1', 'GPNMB', 'HSPG2', 'IGFBP5', 'IL6ST', 'ITGB1BP1', 'LEPR', 'LRP1', 'MMP2', 'PDGFRB', 'PTGIS', 'RAMP2', 'RBPJ', 'RNH1', 'SEMA3C', 'SERPINF1', 'SFRP2', 'TGFBR3', 'THBS2', 'TNFAIP2']
217	GO:BP	GO:0071363	cellular response to growth factor stimulus	0.00172629	TRUE	"Any process that results in a change in state or activity of a cell (in terms of movement, secretion, enzyme production, gene expression, etc.) as a result of a growth factor stimulus." [GOC:mah]	741	92	16	18123	0.173913	0.0215924	FB2	['GO:0070848', 'GO:0071310']	['ASPN', 'COL1A1', 'COL1A2', 'COL3A1', 'COL4A2', 'CREB3L1', 'DKK3', 'GPC3', 'HES1', 'HNRNPA1', 'MEF2C', 'POSTN', 'SNAI2', 'STMN2', 'TNMD', 'WNT5A']
218	GO:BP	GO:0007423	sensory organ development	0.00180728	TRUE	"The process whose specific outcome is the progression of sensory organs over time, from its formation to the mature structure." [GOC:go_curators]	565	92	14	18123	0.152174	0.0247788	FB2	['GO:0048513']	['ADAMTS18', 'COL11A1', 'COL4A1', 'COL5A2', 'HES1', 'HEY2', 'HMGN1', 'INHBA', 'LAMC3', 'MFAP2', 'RBP4', 'SPARC', 'VIM', 'WNT5A']
219	GO:BP	GO:0060562	epithelial tube morphogenesis	0.001932	TRUE	"The process in which the anatomical structures of a tube are generated and organized from an epithelium. Epithelial tubes transport gases, liquids and cells from one site to another and form the basic structure of many organs and tissues, with tube shape and organization varying from the single-celled excretory organ in Caenorhabditis elegans to the branching trees of the mammalian kidney and in…	334	92	11	18123	0.119565	0.0329341	FB2	['GO:0002009', 'GO:0035239']	['COL4A1', 'EDNRA', 'GPC3', 'HES1', 'LMO4', 'MAGED1', 'MDK', 'MEF2C', 'PTCH1', 'SOX4', 'WNT5A']
220	GO:BP	GO:0065007	biological regulation	0.00193552	TRUE	"Any process that modulates a measurable attribute of any biological process, quality or function." [GOC:dph, GOC:isa_complete, GOC:mah, GOC:pr, GOC:vw]	12802	155	135	18123	0.870968	0.0105452	FB3	['GO:0008150']	['ADIRF', 'ALDH1A1', 'ALDOA', 'ANGPTL4', 'APOC1', 'APOE', 'ATF3', 'BMP4', 'BST2', 'BTG1', 'BTG2', 'CCL2', 'CDH15', 'CDKN1C', 'CHCHD10', 'CHODL', 'CHRNA1', 'CIRBP', 'CLDN5', 'CNN3', 'COL18A1', 'CRIP2', 'CSRNP1', 'CXCR4', 'DAG1', 'DDIT4', 'DES', 'DLK1', 'EEF2', 'EGR1', 'EIF4A2', 'FABP5', 'FGFR4', 'FOS', 'FOSB', 'FRZB', 'FXYD6', 'GADD45B', 'GAPDH', 'GPM6B', 'GREM1', 'HES1', 'HEY1', 'HLA-E', 'HSP90AB…
221	GO:BP	GO:0071559	response to transforming growth factor beta	0.00208944	TRUE	"Any process that results in a change in state or activity of a cell or an organism (in terms of movement, secretion, enzyme production, gene expression, etc.) as a result of a transforming growth factor beta stimulus." [GOC:mah]	269	92	10	18123	0.108696	0.0371747	FB2	['GO:0009719', 'GO:0070848']	['ASPN', 'COL1A1', 'COL1A2', 'COL3A1', 'COL4A2', 'DKK3', 'MEF2C', 'MXRA5', 'POSTN', 'WNT5A']
222	GO:BP	GO:0007417	central nervous system development	0.00213195	TRUE	"The process whose specific outcome is the progression of the central nervous system over time, from its formation to the mature structure. The central nervous system is the core nervous system that serves an integrating and coordinating function. In vertebrates it consists of the brain and spinal cord. In those invertebrates with a central nervous system it typically consists of a brain, cerebra…	1052	92	19	18123	0.206522	0.0180608	FB2	['GO:0007399', 'GO:0048731']	['CDH11', 'COL3A1', 'COL4A1', 'HAPLN1', 'HES1', 'ID3', 'INHBA', 'LAMC3', 'LMO4', 'MARCKSL1', 'MDK', 'PTCH1', 'ROBO2', 'SERPINE2', 'SOX4', 'STMN1', 'VCAN', 'VIM', 'WNT5A']
223	GO:BP	GO:0071276	cellular response to cadmium ion	0.00214451	TRUE	"Any process that results in a change in state or activity of a cell (in terms of movement, secretion, enzyme production, gene expression, etc.) as a result of a cadmium (Cd) ion stimulus." [GOC:mah]	40	155	6	18123	0.0387097	0.15	FB3	['GO:0046686', 'GO:0071248']	['FOS', 'JUN', 'MT1E', 'MT1M', 'MT1X', 'MT2A']
224	GO:BP	GO:0008219	cell death	0.00224963	TRUE	"Any biological process that results in permanent cessation of all vital functions of a cell. A cell should be considered dead when any one of the following molecular or morphological criteria is met: (1) the cell has lost the integrity of its plasma membrane; (2) the cell, including its nucleus, has undergone complete fragmentation into discrete bodies (frequently referred to as apoptotic bodies…	2306	155	42	18123	0.270968	0.0182134	FB3	['GO:0009987']	['ANGPTL4', 'APOE', 'ATF3', 'BMP4', 'BTG1', 'BTG2', 'CCL2', 'CHCHD10', 'CSRNP1', 'CXCR4', 'DDIT4', 'EGR1', 'FOS', 'FRZB', 'GADD45B', 'GAPDH', 'GREM1', 'HSP90AB1', 'JUN', 'MAL', 'MIR24-2', 'MYC', 'NACA', 'NET1', 'NPM1', 'PAX7', 'PDK4', 'PEG10', 'RAPSN', 'RPL10', 'RPL26', 'RPS27A', 'RPS3', 'RPS3A', 'RPS6', 'RSL1D1', 'SIRT2', 'SLC25A6', 'SOCS3', 'TMEM123', 'TPD52L1', 'ZFP36']
225	GO:BP	GO:0035905	ascending aorta development	0.00241682	TRUE	"The progression of the ascending aorta over time, from its initial formation to the mature structure. The ascending aorta is the portion of the aorta in a two-pass circulatory system that lies between the heart and the arch of aorta. In a two-pass circulatory system blood passes twice through the heart to supply the body once." [GOC:bf, GOC:dgh, MA:0002570, UBERON:0001496, Wikipedia:Ascending_ao…	5	92	3	18123	0.0326087	0.6	FB2	['GO:0035904', 'GO:0048856']	['HES1', 'HEY2', 'SOX4']
226	GO:BP	GO:0010941	regulation of cell death	0.0024695	TRUE	"Any process that modulates the rate or frequency of cell death. Cell death is the specific activation or halting of processes within a cell so that its vital functions markedly cease, rather than simply deteriorating gradually over time, which culminates in cell death." [GOC:dph, GOC:tb]	1740	155	35	18123	0.225806	0.0201149	FB3	['GO:0008219', 'GO:0050794']	['ANGPTL4', 'APOE', 'ATF3', 'BMP4', 'BTG1', 'BTG2', 'CCL2', 'CXCR4', 'DDIT4', 'EGR1', 'FOS', 'FRZB', 'GADD45B', 'GREM1', 'HSP90AB1', 'JUN', 'MIR24-2', 'MYC', 'NACA', 'NET1', 'NPM1', 'PAX7', 'PDK4', 'RAPSN', 'RPL10', 'RPL26', 'RPS27A', 'RPS3', 'RPS3A', 'RPS6', 'RSL1D1', 'SIRT2', 'SOCS3', 'TPD52L1', 'ZFP36']
227	GO:BP	GO:0048523	negative regulation of cellular process	0.00256931	TRUE	"Any process that stops, prevents, or reduces the frequency, rate or extent of a cellular process, any of those that are carried out at the cellular level, but are not necessarily restricted to a single cell. For example, cell communication occurs among more than one cell, but occurs at the cellular level." [GOC:jid]	5153	92	48	18123	0.521739	0.00931496	FB2	['GO:0009987', 'GO:0048519', 'GO:0050794']	['ADAMTS18', 'ASPN', 'CCND1', 'COL1A1', 'COL3A1', 'COL5A2', 'COL6A3', 'CREB3L1', 'DKK3', 'DPEP1', 'EDNRB', 'F2R', 'GEM', 'GPC3', 'HES1', 'HEY2', 'HNRNPA1', 'ID3', 'INHBA', 'KRT16', 'LMO4', 'MAGED1', 'MDK', 'MEF2C', 'NOTCH3', 'NPM1', 'PABPC1', 'PLK2', 'POSTN', 'PPP1R14A', 'PTCH1', 'PTMA', 'RBP4', 'ROBO2', 'SERPINE2', 'SERPINH1', 'SNAI2', 'SOX4', 'SPARC', 'STMN1', 'STMN2', 'TMEM119', 'TNMD', 'TNN',…
228	GO:BP	GO:0071310	cellular response to organic substance	0.00273197	TRUE	"Any process that results in a change in state or activity of a cell (in terms of movement, secretion, enzyme production, gene expression, etc.) as a result of an organic substance stimulus." [GOC:mah]	2821	92	33	18123	0.358696	0.011698	FB2	['GO:0010033', 'GO:0070887']	['ALPL', 'ASPN', 'CCND1', 'COL1A1', 'COL1A2', 'COL3A1', 'COL4A1', 'COL4A2', 'COL5A2', 'COL6A1', 'CREB3L1', 'DKK3', 'EDNRB', 'FSCN1', 'GPC3', 'HES1', 'HNRNPA1', 'ID3', 'IL11RA', 'INHBA', 'MEF2C', 'NPM1', 'POSTN', 'PTCH1', 'RAB13', 'ROBO2', 'SNAI2', 'SOX4', 'STMN2', 'TNMD', 'UGT3A2', 'VIM', 'WNT5A']
229	GO:BP	GO:0012501	programmed cell death	0.00284272	TRUE	"A process which begins when a cell receives an internal or external signal and activates a series of biochemical events (signaling pathway). The process ends with the death of the cell." [GOC:lr, GOC:mtg_apoptosis]	2158	155	40	18123	0.258065	0.0185357	FB3	['GO:0008219']	['ANGPTL4', 'APOE', 'ATF3', 'BMP4', 'BTG1', 'BTG2', 'CCL2', 'CHCHD10', 'CSRNP1', 'CXCR4', 'DDIT4', 'EGR1', 'FRZB', 'GADD45B', 'GAPDH', 'GREM1', 'HSP90AB1', 'JUN', 'MAL', 'MIR24-2', 'MYC', 'NACA', 'NET1', 'NPM1', 'PAX7', 'PDK4', 'PEG10', 'RAPSN', 'RPL10', 'RPL26', 'RPS27A', 'RPS3', 'RPS3A', 'RPS6', 'RSL1D1', 'SIRT2', 'SLC25A6', 'SOCS3', 'TPD52L1', 'ZFP36']
230	GO:BP	GO:0050896	response to stimulus	0.00304371	TRUE	"Any process that results in a change in state or activity of a cell or an organism (in terms of movement, secretion, enzyme production, gene expression, etc.) as a result of a stimulus. The process begins with detection of the stimulus and ends with a change in state or activity or the cell or organism." [GOC:ai, GOC:bf]	9487	168	118	18123	0.702381	0.0124381	FB1	['GO:0008150']	['ABI3BP', 'ACKR3', 'ACKR4', 'ADM', 'AKAP12', 'AKR1C1', 'AKR1C2', 'AKR1C3', 'ANGPTL1', 'ANK2', 'APOD', 'AXL', 'C1R', 'C1S', 'C3', 'CCDC80', 'CD34', 'CD55', 'CD81', 'CFD', 'CFH', 'CHRDL1', 'CLEC3B', 'CLU', 'CRIP1', 'CST3', 'CTHRC1', 'CTSK', 'CXCL12', 'CYB5R3', 'CYBRD1', 'DCN', 'ECM1', 'EFEMP1', 'ENTPD1', 'EPHX1', 'FBLN1', 'FBLN5', 'FBN1', 'FIBIN', 'FSTL1', 'FTH1', 'FTL', 'GAS1', 'GFRA1', 'GNG11', …
231	GO:BP	GO:0043067	regulation of programmed cell death	0.00323165	TRUE	"Any process that modulates the frequency, rate or extent of programmed cell death, cell death resulting from activation of endogenous cellular processes." [GOC:jl]	1603	155	33	18123	0.212903	0.0205864	FB3	['GO:0010941', 'GO:0012501']	['ANGPTL4', 'APOE', 'ATF3', 'BMP4', 'BTG1', 'BTG2', 'CCL2', 'CXCR4', 'EGR1', 'FRZB', 'GADD45B', 'GREM1', 'HSP90AB1', 'JUN', 'MIR24-2', 'MYC', 'NACA', 'NET1', 'NPM1', 'PAX7', 'PDK4', 'RAPSN', 'RPL10', 'RPL26', 'RPS27A', 'RPS3', 'RPS3A', 'RPS6', 'RSL1D1', 'SIRT2', 'SOCS3', 'TPD52L1', 'ZFP36']
232	GO:BP	GO:0052547	regulation of peptidase activity	0.00323172	TRUE	"Any process that modulates the frequency, rate or extent of peptidase activity, the hydrolysis of peptide bonds within proteins." [GOC:ai]	467	168	17	18123	0.10119	0.0364026	FB1	['GO:0030162', 'GO:0051336']	['C3', 'CST3', 'ECM1', 'FBLN1', 'GSN', 'LRP1', 'PCOLCE2', 'PI16', 'SERPINF1', 'SERPING1', 'SFRP2', 'SLPI', 'SPOCK1', 'TFPI', 'TIMP1', 'TIMP2', 'TIMP3']
233	GO:BP	GO:0060412	ventricular septum morphogenesis	0.0033219	TRUE	"The developmental process in which a ventricular septum is generated and organized. A ventricular septum is an anatomical structure that separates the lower chambers (ventricles) of the heart from one another." [GOC:dph]	40	92	5	18123	0.0543478	0.125	FB2	['GO:0003281', 'GO:0060411']	['HES1', 'HEY2', 'ROBO2', 'SOX4', 'WNT5A']
234	GO:BP	GO:0003281	ventricular septum development	0.00333052	TRUE	"The progression of the ventricular septum over time from its formation to the mature structure." [GOC:mtg_heart]	72	92	6	18123	0.0652174	0.0833333	FB2	['GO:0003231', 'GO:0003279']	['HES1', 'HEY2', 'LMO4', 'ROBO2', 'SOX4', 'WNT5A']
235	GO:BP	GO:0001503	ossification	0.00347755	TRUE	"The formation of bone or of a bony substance, or the conversion of fibrous tissue or of cartilage into bone or a bony substance." [GOC:mtg_mpo, PMID:17572649]	418	168	16	18123	0.0952381	0.0382775	FB1	['GO:0032501']	['CHRDL1', 'CLEC3B', 'CTHRC1', 'CTSK', 'ECM1', 'GPNMB', 'IGFBP5', 'IL6ST', 'JUND', 'MGP', 'MMP2', 'MRC2', 'OMD', 'OSR2', 'RBPJ', 'SFRP2']
236	GO:BP	GO:0031214	biomineral tissue development	0.00355958	TRUE	"Formation of hard tissues that consist mainly of inorganic compounds, and also contain a small amounts of organic matrices that are believed to play important roles in their formation." [PMID:15132736]	164	92	8	18123	0.0869565	0.0487805	FB2	['GO:0009888', 'GO:0048513', 'GO:0110148']	['ALPL', 'ASPN', 'COL1A1', 'COL1A2', 'GPC3', 'HEY2', 'MEF2C', 'TMEM119']
237	GO:BP	GO:0009891	positive regulation of biosynthetic process	0.00364489	TRUE	"Any process that activates or increases the frequency, rate or extent of the chemical reactions and pathways resulting in the formation of substances." [GOC:go_curators]	2013	155	38	18123	0.245161	0.0188773	FB3	['GO:0009058', 'GO:0009889', 'GO:0009893']	['ADIRF', 'APOE', 'ATF3', 'BMP4', 'CCL2', 'CDKN1C', 'CHCHD10', 'CIRBP', 'CSRNP1', 'EEF2', 'EGR1', 'FGFR4', 'FOS', 'FOSB', 'GREM1', 'HES1', 'HEY1', 'HSP90AB1', 'JUN', 'JUNB', 'KLF10', 'MAFF', 'MIR24-2', 'MYC', 'MYF5', 'MYF6', 'NACA', 'NOTCH3', 'NPM1', 'PITX2', 'RPL26', 'RPL5', 'RPS27A', 'RPS4X', 'RPS9', 'RXRG', 'SERTAD1', 'SIRT2']
238	GO:BP	GO:0030182	neuron differentiation	0.00368079	TRUE	"The process in which a relatively unspecialized cell acquires specialized features of a neuron." [GOC:mah]	1427	92	22	18123	0.23913	0.015417	FB2	['GO:0030154', 'GO:0048699']	['CDH11', 'EDNRB', 'HES1', 'HEY2', 'ID3', 'INHBA', 'LMO4', 'MDK', 'MEF2C', 'NOTCH3', 'PALLD', 'PLK2', 'POSTN', 'PTCH1', 'RAB13', 'ROBO2', 'SOX4', 'STMN1', 'STMN2', 'TNN', 'VIM', 'WNT5A']
239	GO:BP	GO:0048598	embryonic morphogenesis	0.00373902	TRUE	"The process in which anatomical structures are generated and organized during the embryonic phase. The embryonic phase begins with zygote formation. The end of the embryonic phase is organism-specific. For example, it would be at birth for mammals, larval hatching for insects and seed dormancy in plants." [GOC:jid, GOC:mtg_sensu]	601	92	14	18123	0.152174	0.0232945	FB2	['GO:0009653', 'GO:0009790']	['COL11A1', 'COL4A2', 'COL5A2', 'COL6A1', 'GPC3', 'HES1', 'INHBA', 'LMO4', 'MEF2C', 'MFAP2', 'PTCH1', 'RBP4', 'SOX4', 'WNT5A']
240	GO:BP	GO:0110148	biomineralization	0.00389807	TRUE	"The process where mineral crystals are formed and deposited in an organized fashion in a matrix (either cellular or extracellular) by living organisms. This gives rise to inorganic compound-based structures such as skeleton, teeth, ivory, shells, cuticle, and corals as well as bacterial biomineralization products." [GOC:aa, PMID:24395694, PMID:28229486]	166	92	8	18123	0.0869565	0.0481928	FB2	['GO:0008150']	['ALPL', 'ASPN', 'COL1A1', 'COL1A2', 'GPC3', 'HEY2', 'MEF2C', 'TMEM119']
241	GO:BP	GO:0030334	regulation of cell migration	0.00391301	TRUE	"Any process that modulates the frequency, rate or extent of cell migration." [GOC:go_curators]	1008	168	26	18123	0.154762	0.0257937	FB1	['GO:0016477', 'GO:2000145']	['ACKR3', 'AKAP12', 'APOD', 'CD81', 'CXCL12', 'DCN', 'ECM1', 'FBLN1', 'GPNMB', 'IGFBP5', 'ITGB1BP1', 'LGALS3', 'LRP1', 'NBL1', 'PDGFD', 'PDGFRB', 'PODN', 'S100A11', 'SDCBP', 'SEMA3C', 'SERPINF1', 'SFRP2', 'TIMP1', 'TMSB4X', 'TNFAIP6', 'XG']
242	GO:BP	GO:0006897	endocytosis	0.00414259	TRUE	"A vesicle-mediated transport process in which cells take up external materials or membrane constituents by the invagination of a small region of the plasma membrane to form a new membrane-bounded vesicle." [GOC:mah, ISBN:0198506732, ISBN:0716731363]	700	168	21	18123	0.125	0.03	FB1	['GO:0016192']	['ACKR3', 'ACKR4', 'ADM', 'ANK2', 'AXL', 'C3', 'CD81', 'CLTB', 'CLU', 'GSN', 'HSPG2', 'LGALS3', 'LRP1', 'MRC2', 'PRG4', 'RAMP2', 'SCARA5', 'SDCBP', 'SFRP4', 'SSC5D', 'TRIP10']
243	GO:BP	GO:0045597	positive regulation of cell differentiation	0.00426112	TRUE	"Any process that activates or increases the frequency, rate or extent of cell differentiation." [GOC:go_curators]	892	155	23	18123	0.148387	0.0257848	FB3	['GO:0030154', 'GO:0045595', 'GO:0048522', 'GO:0051094']	['ADIRF', 'BMP4', 'BTG1', 'CDH15', 'CHODL', 'CLDN5', 'CXCR4', 'DAG1', 'FOS', 'FRZB', 'GREM1', 'HES1', 'HSP90AB1', 'JUN', 'JUNB', 'KLF10', 'MYC', 'MYF5', 'MYF6', 'NPPC', 'SIRT2', 'SOCS3', 'ZFP36']
244	GO:BP	GO:0048251	elastic fiber assembly	0.00429809	TRUE	"Assembly of the extracellular matrix fibers that enables the matrix to recoil after transient stretching." [GOC:jid, PMID:10841810, PMID:12615674]	11	168	4	18123	0.0238095	0.363636	FB1	['GO:0085029', 'GO:0097435']	['FBLN5', 'LTBP4', 'MFAP4', 'TNXB']
245	GO:BP	GO:0045596	negative regulation of cell differentiation	0.00442061	TRUE	"Any process that stops, prevents, or reduces the frequency, rate or extent of cell differentiation." [GOC:go_curators]	701	92	15	18123	0.163043	0.021398	FB2	['GO:0030154', 'GO:0045595', 'GO:0048523', 'GO:0051093']	['CCND1', 'COL5A2', 'EDNRB', 'HES1', 'HEY2', 'ID3', 'INHBA', 'MDK', 'POSTN', 'PTCH1', 'SNAI2', 'TMEM119', 'TNN', 'WNT5A', 'WWTR1']
246	GO:BP	GO:0051270	regulation of cellular component movement	0.00454521	TRUE	"Any process that modulates the frequency, rate or extent of the movement of a cellular component." [GOC:ai, GOC:dph, GOC:jl]	1149	168	28	18123	0.166667	0.024369	FB1	['GO:0006928', 'GO:0032879', 'GO:0050794']	['ACKR3', 'AKAP12', 'ANK2', 'APOD', 'CD81', 'CXCL12', 'DCN', 'ECM1', 'FBLN1', 'GPNMB', 'IGFBP5', 'ITGB1BP1', 'LGALS3', 'LRP1', 'NBL1', 'PDGFD', 'PDGFRB', 'PODN', 'S100A11', 'SDCBP', 'SEMA3C', 'SERPINF1', 'SFRP2', 'TGFBR3', 'TIMP1', 'TMSB4X', 'TNFAIP6', 'XG']
247	GO:BP	GO:0048523	negative regulation of cellular process	0.00462474	TRUE	"Any process that stops, prevents, or reduces the frequency, rate or extent of a cellular process, any of those that are carried out at the cellular level, but are not necessarily restricted to a single cell. For example, cell communication occurs among more than one cell, but occurs at the cellular level." [GOC:jid]	5153	168	76	18123	0.452381	0.0147487	FB1	['GO:0009987', 'GO:0048519', 'GO:0050794']	['ABI3BP', 'ACKR3', 'ADD3', 'ADM', 'AEBP1', 'AKR1C3', 'ANK2', 'APOD', 'AXL', 'C3', 'CD34', 'CHRDL1', 'CLU', 'CST3', 'CTHRC1', 'CXCL12', 'DCN', 'DPT', 'ECM1', 'EFEMP1', 'FBLN1', 'FBN1', 'FSTL1', 'FTH1', 'GAS1', 'GPNMB', 'GPX4', 'GSN', 'H2AFJ', 'IGFBP5', 'IGFBP6', 'IGFBP7', 'IL6ST', 'ITGB1BP1', 'ITM2A', 'ITM2B', 'LEPR', 'LEPROT', 'LGALS3', 'LIMA1', 'LRP1', 'NBL1', 'NDRG1', 'NUPR1', 'OSR2', 'PDGFRB'…
248	GO:BP	GO:0001822	kidney development	0.00464914	TRUE	"The process whose specific outcome is the progression of the kidney over time, from its formation to the mature structure. The kidney is an organ that filters the blood and/or excretes the end products of body metabolism in the form of urine." [GOC:dph, GOC:mtg_kidney_jan10, ISBN:0124020607, ISBN:0721662544]	294	92	10	18123	0.108696	0.0340136	FB2	['GO:0048513', 'GO:0072001']	['GPC3', 'HES1', 'ID3', 'MAGED1', 'MEF2C', 'PTCH1', 'ROBO2', 'SOX4', 'WNT5A', 'WWTR1']
249	GO:BP	GO:0033993	response to lipid	0.00494491	TRUE	"Any process that results in a change in state or activity of a cell or an organism (in terms of movement, secretion, enzyme production, gene expression, etc.) as a result of a lipid stimulus." [GOC:sl]	956	168	25	18123	0.14881	0.0261506	FB1	['GO:0010033']	['ADM', 'AKAP12', 'AKR1C1', 'AKR1C2', 'AKR1C3', 'AXL', 'CD55', 'CLU', 'DCN', 'FIBIN', 'GPX3', 'GPX4', 'IGFBP7', 'JUND', 'MGST1', 'PAM', 'PDGFRB', 'PTGES', 'RAMP2', 'SERPINF1', 'SLIT3', 'SLPI', 'TFPI', 'TXNIP', 'YWHAH']
250	GO:BP	GO:0061333	renal tubule morphogenesis	0.00495238	TRUE	"The process in which the renal tubule is generated by specification of cell fate, through the maintenance of cell polarity, regulated cell proliferation and morphogenetic cell rearrangements, shape changes and growth. A renal tubule is a tube that filters, re-absorbs and secretes substances to rid an organism of waste and to play a role in fluid homeostasis." [GOC:dph, GOC:mtg_kidney_jan10]	77	92	6	18123	0.0652174	0.0779221	FB2	['GO:0060562', 'GO:0061326']	['COL4A1', 'GPC3', 'HES1', 'MAGED1', 'MEF2C', 'PTCH1']
251	GO:BP	GO:0008285	negative regulation of cell population proliferation	0.00499391	TRUE	"Any process that stops, prevents or reduces the rate or extent of cell proliferation." [GOC:go_curators]	804	92	16	18123	0.173913	0.0199005	FB2	['GO:0008283', 'GO:0042127', 'GO:0048523']	['F2R', 'GPC3', 'HES1', 'INHBA', 'MAGED1', 'MEF2C', 'NPM1', 'PTCH1', 'RBP4', 'SERPINE2', 'SNAI2', 'SOX4', 'SPARC', 'TNMD', 'TNN', 'WNT5A']
252	GO:BP	GO:0043312	neutrophil degranulation	0.00509257	TRUE	"The regulated exocytosis of secretory granules containing preformed mediators such as proteases, lipases, and inflammatory mediators by a neutrophil." [ISBN:0781735149]	483	168	17	18123	0.10119	0.0351967	FB1	['GO:0002283', 'GO:0002446', 'GO:0043299']	['C3', 'CD55', 'CFD', 'CST3', 'CYB5R3', 'FTH1', 'FTL', 'GSN', 'LGALS3', 'MGST1', 'NPC2', 'S100A11', 'SDCBP', 'SLPI', 'TIMP2', 'TNFAIP6', 'VAT1']
253	GO:BP	GO:0009725	response to hormone	0.00513187	TRUE	"Any process that results in a change in state or activity of a cell or an organism (in terms of movement, secretion, enzyme production, gene expression, etc.) as a result of a hormone stimulus." [GOC:jl]	958	168	25	18123	0.14881	0.026096	FB1	['GO:0009719', 'GO:0010033']	['ADM', 'AKR1C1', 'AKR1C2', 'AKR1C3', 'CXCL12', 'FBN1', 'FIBIN', 'IGFBP5', 'IGFBP7', 'JUND', 'LEPR', 'LEPROT', 'PAM', 'PDGFRB', 'RAMP2', 'SERPINF1', 'SFRP4', 'SLIT3', 'TFPI', 'TGFBR3', 'TIMP1', 'TIMP2', 'TIMP3', 'TXNIP', 'YWHAH']
254	GO:BP	GO:0043299	leukocyte degranulation	0.0051989	TRUE	"The regulated exocytosis of secretory granules by a leukocyte." [GO_REF:0000022, GOC:add, ISBN:0781735149]	538	168	18	18123	0.107143	0.0334572	FB1	['GO:0002252', 'GO:0045055', 'GO:0051649']	['C3', 'CD55', 'CFD', 'CST3', 'CYB5R3', 'FTH1', 'FTL', 'GSN', 'LGALS3', 'MGST1', 'NPC2', 'S100A11', 'S100A13', 'SDCBP', 'SLPI', 'TIMP2', 'TNFAIP6', 'VAT1']
255	GO:BP	GO:0042981	regulation of apoptotic process	0.00520131	TRUE	"Any process that modulates the occurrence or rate of cell death by apoptotic process." [GOC:jl, GOC:mtg_apoptosis]	1560	155	32	18123	0.206452	0.0205128	FB3	['GO:0006915', 'GO:0043067']	['ANGPTL4', 'APOE', 'ATF3', 'BMP4', 'BTG1', 'BTG2', 'CCL2', 'EGR1', 'FRZB', 'GADD45B', 'GREM1', 'HSP90AB1', 'JUN', 'MIR24-2', 'MYC', 'NACA', 'NET1', 'NPM1', 'PAX7', 'PDK4', 'RAPSN', 'RPL10', 'RPL26', 'RPS27A', 'RPS3', 'RPS3A', 'RPS6', 'RSL1D1', 'SIRT2', 'SOCS3', 'TPD52L1', 'ZFP36']
256	GO:BP	GO:0002576	platelet degranulation	0.00545502	TRUE	"The regulated exocytosis of secretory granules containing preformed mediators such as histamine and serotonin by a platelet." [GOC:add]	127	168	9	18123	0.0535714	0.0708661	FB1	['GO:0045055', 'GO:0051649']	['CFD', 'CLEC3B', 'CLU', 'ECM1', 'ISLR', 'SERPING1', 'TIMP1', 'TIMP3', 'TMSB4X']
257	GO:BP	GO:0002283	neutrophil activation involved in immune response	0.00584667	TRUE	"The change in morphology and behavior of a neutrophil resulting from exposure to a cytokine, chemokine, cellular ligand, or soluble factor, leading to the initiation or perpetuation of an immune response." [GOC:add, ISBN:0781735149]	488	168	17	18123	0.10119	0.0348361	FB1	['GO:0002275', 'GO:0042119']	['C3', 'CD55', 'CFD', 'CST3', 'CYB5R3', 'FTH1', 'FTL', 'GSN', 'LGALS3', 'MGST1', 'NPC2', 'S100A11', 'SDCBP', 'SLPI', 'TIMP2', 'TNFAIP6', 'VAT1']
258	GO:BP	GO:0071395	cellular response to jasmonic acid stimulus	0.00597855	TRUE	"Any process that results in a change in state or activity of a cell (in terms of movement, secretion, enzyme production, gene expression, etc.) as a result of a jasmonic acid stimulus." [GOC:mah]	4	168	3	18123	0.0178571	0.75	FB1	['GO:0009753', 'GO:0032870', 'GO:0071398']	['AKR1C1', 'AKR1C2', 'AKR1C3']
259	GO:BP	GO:0009753	response to jasmonic acid	0.00597855	TRUE	"Any process that results in a change in state or activity of a cell or an organism (in terms of movement, secretion, enzyme production, gene expression, etc.) as a result of a jasmonic acid stimulus." [GOC:jl]	4	168	3	18123	0.0178571	0.75	FB1	['GO:0009725', 'GO:0070542']	['AKR1C1', 'AKR1C2', 'AKR1C3']
260	GO:BP	GO:0035987	endodermal cell differentiation	0.00604584	TRUE	"The process in which a relatively unspecialized cell acquires the specialized features of an endoderm cell, a cell of the inner of the three germ layers of the embryo." [CL:0000223, GOC:yaf, PMID:17624332]	45	92	5	18123	0.0543478	0.111111	FB2	['GO:0001706', 'GO:0030154']	['COL11A1', 'COL4A2', 'COL5A2', 'COL6A1', 'INHBA']
261	GO:BP	GO:0008283	cell population proliferation	0.00614376	TRUE	"The multiplication or reproduction of cells, resulting in the expansion of a cell population." [GOC:mah, GOC:mb]	2057	155	38	18123	0.245161	0.0184735	FB3	['GO:0009987']	['APOE', 'ATF3', 'BMP4', 'BST2', 'BTG1', 'BTG2', 'CCL2', 'CDKN1C', 'CLDN5', 'COL18A1', 'CRIP2', 'EEF2', 'EGR1', 'FGFR4', 'FRZB', 'GREM1', 'HES1', 'HLA-E', 'IMPDH2', 'JUN', 'JUNB', 'KLF10', 'KLHL41', 'MIR24-2', 'MYC', 'NACA', 'NDRG2', 'NPM1', 'NPPC', 'PITX2', 'RPS3', 'RPS4X', 'RPS6', 'RPS9', 'SERPINB1', 'SERTAD1', 'SIRT2', 'ZFP36']
262	GO:BP	GO:0048870	cell motility	0.00617032	TRUE	"Any process involved in the controlled self-propelled movement of a cell that results in translocation of the cell from one place to another." [GOC:dgh, GOC:dph, GOC:isa_complete, GOC:mlg]	1840	92	25	18123	0.271739	0.013587	FB2	['GO:0006928', 'GO:0040011', 'GO:0051674']	['COL1A1', 'COL1A2', 'COL3A1', 'DPEP1', 'EDNRB', 'ENPP2', 'F2R', 'FSCN1', 'GPC3', 'HES1', 'KRT16', 'LAMC3', 'LMO4', 'MDK', 'MEF2C', 'PALLD', 'PLK2', 'POSTN', 'RAB13', 'SERPINE2', 'SNAI2', 'SPARC', 'TNN', 'VCAN', 'WNT5A']
263	GO:BP	GO:0051674	localization of cell	0.00617032	TRUE	"Any process in which a cell is transported to, and/or maintained in, a specific location." [GOC:ai]	1840	92	25	18123	0.271739	0.013587	FB2	['GO:0009987', 'GO:0051179']	['COL1A1', 'COL1A2', 'COL3A1', 'DPEP1', 'EDNRB', 'ENPP2', 'F2R', 'FSCN1', 'GPC3', 'HES1', 'KRT16', 'LAMC3', 'LMO4', 'MDK', 'MEF2C', 'PALLD', 'PLK2', 'POSTN', 'RAB13', 'SERPINE2', 'SNAI2', 'SPARC', 'TNN', 'VCAN', 'WNT5A']
264	GO:BP	GO:0050680	negative regulation of epithelial cell proliferation	0.00656036	TRUE	"Any process that stops, prevents or reduces the rate or extent of epithelial cell proliferation." [GOC:ai]	178	92	8	18123	0.0869565	0.0449438	FB2	['GO:0008285', 'GO:0050673', 'GO:0050678']	['GPC3', 'MAGED1', 'MEF2C', 'PTCH1', 'SNAI2', 'SPARC', 'TNMD', 'WNT5A']
265	GO:BP	GO:0009605	response to external stimulus	0.00676648	TRUE	"Any process that results in a change in state or activity of a cell or an organism (in terms of movement, secretion, enzyme production, gene expression, etc.) as a result of an external stimulus." [GOC:hb]	3114	168	53	18123	0.315476	0.0170199	FB1	['GO:0050896']	['ACKR3', 'ACKR4', 'ADM', 'AKAP12', 'AKR1C3', 'AXL', 'C1R', 'C1S', 'C3', 'CCDC80', 'CD34', 'CD55', 'CD81', 'CFD', 'CFH', 'CLU', 'CXCL12', 'DCN', 'GFRA1', 'GPNMB', 'GPX4', 'GSN', 'HSD3B7', 'IL6ST', 'JUND', 'LGALS3', 'LRP1', 'MFAP4', 'MGST1', 'NBL1', 'NPC2', 'NT5E', 'NTN4', 'NUPR1', 'PDGFD', 'PDGFRB', 'PPL', 'PTGES', 'PTGIS', 'RAB32', 'RAMP2', 'RBPJ', 'SEMA3C', 'SERPINF1', 'SERPING1', 'SFRP2', 'SLI…
266	GO:BP	GO:0002275	myeloid cell activation involved in immune response	0.00743702	TRUE	"A change in the morphology or behavior of a myeloid cell resulting from exposure to an activating factor such as a cellular or soluble ligand, leading to the initiation or perpetuation of an immune response." [GOC:add, ISBN:0781735149]	552	168	18	18123	0.107143	0.0326087	FB1	['GO:0002274', 'GO:0002366']	['C3', 'CD55', 'CFD', 'CST3', 'CYB5R3', 'FTH1', 'FTL', 'GSN', 'LGALS3', 'MGST1', 'NPC2', 'S100A11', 'S100A13', 'SDCBP', 'SLPI', 'TIMP2', 'TNFAIP6', 'VAT1']
267	GO:BP	GO:0002263	cell activation involved in immune response	0.0074834	TRUE	"A change in the morphology or behavior of a cell resulting from exposure to an activating factor such as a cellular or soluble ligand, leading to the initiation or perpetuation of an immune response." [GO_REF:0000022, GOC:add, ISBN:0781735149]	727	168	21	18123	0.125	0.0288858	FB1	['GO:0001775', 'GO:0002252', 'GO:0006955']	['C3', 'CD55', 'CD81', 'CFD', 'CST3', 'CYB5R3', 'FTH1', 'FTL', 'GSN', 'ITM2A', 'LGALS3', 'LRP1', 'MGST1', 'NPC2', 'S100A11', 'S100A13', 'SDCBP', 'SLPI', 'TIMP2', 'TNFAIP6', 'VAT1']
268	GO:BP	GO:0048468	cell development	0.00769249	TRUE	"The process whose specific outcome is the progression of the cell over time, from its formation to the mature structure. Cell development does not include the steps involved in committing a cell to a specific fate." [GOC:go_curators]	2122	92	27	18123	0.293478	0.0127238	FB2	['GO:0030154', 'GO:0048856', 'GO:0048869']	['CDH11', 'COL11A1', 'EDNRA', 'EDNRB', 'HES1', 'HEY2', 'LAMC3', 'MDK', 'MEF2C', 'NAP1L1', 'NOTCH3', 'PALLD', 'PLK2', 'POSTN', 'PTCH1', 'RAB13', 'ROBO2', 'SERPINE2', 'SERPINH1', 'SNAI2', 'SOX4', 'STMN1', 'STMN2', 'TNMD', 'TNN', 'VIM', 'WNT5A']
269	GO:BP	GO:0022603	regulation of anatomical structure morphogenesis	0.00794946	TRUE	"Any process that modulates the frequency, rate or extent of anatomical structure morphogenesis." [GOC:mah]	1048	168	26	18123	0.154762	0.0248092	FB1	['GO:0009653', 'GO:0050793']	['ADM', 'C3', 'CD34', 'CST3', 'CTHRC1', 'CXCL12', 'DBN1', 'DCN', 'ECM1', 'FBLN1', 'GPNMB', 'HSPG2', 'ITGB1BP1', 'LRP1', 'NTN4', 'PTGIS', 'RAMP2', 'RNH1', 'S100A13', 'SDC2', 'SEMA3C', 'SERPINF1', 'SFRP2', 'THBS2', 'VAT1', 'YWHAH']
270	GO:BP	GO:0051240	positive regulation of multicellular organismal process	0.00806604	TRUE	"Any process that activates or increases the frequency, rate or extent of an organismal process, any of the processes pertinent to the function of an organism above the cellular level; includes the integrated processes of tissues and organs." [GOC:ai]	1497	92	22	18123	0.23913	0.0146961	FB2	['GO:0032501', 'GO:0048518', 'GO:0051239']	['CCND1', 'COL1A1', 'EDNRB', 'F2R', 'HES1', 'HEY2', 'INHBA', 'KRT17', 'LUM', 'MAGED1', 'MDK', 'MEF2C', 'MFAP2', 'NAP1L1', 'POSTN', 'PTGER3', 'ROBO2', 'SERPINE2', 'SOX4', 'TMEM119', 'WNT5A', 'WWTR1']
271	GO:BP	GO:0002446	neutrophil mediated immunity	0.00808345	TRUE	"Any process involved in the carrying out of an immune response by a neutrophil." [GO_REF:0000022, GOC:add, ISBN:0781735149]	500	168	17	18123	0.10119	0.034	FB1	['GO:0002444']	['C3', 'CD55', 'CFD', 'CST3', 'CYB5R3', 'FTH1', 'FTL', 'GSN', 'LGALS3', 'MGST1', 'NPC2', 'S100A11', 'SDCBP', 'SLPI', 'TIMP2', 'TNFAIP6', 'VAT1']
272	GO:BP	GO:0042119	neutrophil activation	0.00852336	TRUE	"The change in morphology and behavior of a neutrophil resulting from exposure to a cytokine, chemokine, cellular ligand, or soluble factor." [GOC:mgi_curators, ISBN:0781735149]	502	168	17	18123	0.10119	0.0338645	FB1	['GO:0036230']	['C3', 'CD55', 'CFD', 'CST3', 'CYB5R3', 'FTH1', 'FTL', 'GSN', 'LGALS3', 'MGST1', 'NPC2', 'S100A11', 'SDCBP', 'SLPI', 'TIMP2', 'TNFAIP6', 'VAT1']
273	GO:BP	GO:0002444	myeloid leukocyte mediated immunity	0.0086383	TRUE	"Any process involved in the carrying out of an immune response by a myeloid leukocyte." [GO_REF:0000022, GOC:add, ISBN:0781735149]	558	168	18	18123	0.107143	0.0322581	FB1	['GO:0002443']	['C3', 'CD55', 'CFD', 'CST3', 'CYB5R3', 'FTH1', 'FTL', 'GSN', 'LGALS3', 'MGST1', 'NPC2', 'S100A11', 'S100A13', 'SDCBP', 'SLPI', 'TIMP2', 'TNFAIP6', 'VAT1']
274	GO:BP	GO:0085029	extracellular matrix assembly	0.00874683	TRUE	"The aggregation, arrangement and bonding together of the extracellular matrix." [GOC:jl]	47	168	6	18123	0.0357143	0.12766	FB1	['GO:0022607', 'GO:0030198']	['FBLN5', 'LTBP4', 'MFAP4', 'NTN4', 'RAMP2', 'TNXB']
275	GO:BP	GO:0051179	localization	0.00927733	TRUE	"Any process in which a cell, a substance, or a cellular entity, such as a protein complex or organelle, is transported, tethered to or otherwise maintained in a specific location. In the case of substances, localization may also be achieved via selective degradation." [GOC:ai, GOC:dos]	6938	155	87	18123	0.56129	0.0125396	FB3	['GO:0008150']	['ALDOA', 'APOC1', 'APOE', 'BMP4', 'BST2', 'BTG1', 'CA3', 'CCL2', 'CHCHD10', 'CHRNA1', 'CLCN5', 'CLDN5', 'CXCR4', 'DAG1', 'DDIT4', 'EEF2', 'FABP5', 'FBL', 'FGFR4', 'FXYD6', 'GPM6B', 'GREM1', 'HES1', 'HSP90AB1', 'IMPDH2', 'JSRP1', 'KCNN3', 'MAL', 'MEST', 'MIDN', 'MIR24-2', 'MYC', 'NACA', 'NET1', 'NPM1', 'PITX2', 'RAPSN', 'RPL10', 'RPL10A', 'RPL12', 'RPL13', 'RPL15', 'RPL17', 'RPL18', 'RPL21', 'RPL…
276	GO:BP	GO:0009888	tissue development	0.00929001	TRUE	"The process whose specific outcome is the progression of a tissue over time, from its formation to the mature structure." [ISBN:0471245208]	2093	155	38	18123	0.245161	0.0181558	FB3	['GO:0048856']	['ATF3', 'BMP4', 'BTG1', 'BTG2', 'CHRNA1', 'CLDN5', 'CNN3', 'COL18A1', 'CXCR4', 'DAG1', 'EEF2', 'EGR1', 'FABP5', 'FOS', 'FRZB', 'GPM6B', 'GREM1', 'HES1', 'HEY1', 'JUNB', 'KLF10', 'KLHL41', 'MAFF', 'MEST', 'MIR24-2', 'MSC', 'MYC', 'MYF5', 'MYF6', 'NACA', 'NPPC', 'PITX2', 'SIRT2', 'SOCS3', 'STAC3', 'TAGLN', 'UGCG', 'ZFP36']
277	GO:BP	GO:0009790	embryo development	0.00953743	TRUE	"The process whose specific outcome is the progression of an embryo from its formation until the end of its embryonic life stage. The end of the embryonic stage is organism-specific. For example, for mammals, the process would begin with zygote formation and end with birth. For insects, the process would begin at zygote formation and end with larval hatching. For plant zygotic embryos, this would…	1055	92	18	18123	0.195652	0.0170616	FB2	['GO:0007275']	['COL11A1', 'COL1A1', 'COL4A2', 'COL5A2', 'COL6A1', 'EDNRA', 'GPC3', 'HES1', 'HEY2', 'ID3', 'INHBA', 'LMO4', 'MEF2C', 'MFAP2', 'PTCH1', 'RBP4', 'SOX4', 'WNT5A']
278	GO:BP	GO:0010273	detoxification of copper ion	0.00963949	TRUE	"Any process that reduces or removes the toxicity of copper ion. These include transport of copper away from sensitive areas and to compartments or complexes whose purpose is sequestration of copper ion." [GOC:kmv, PMID:16367966]	14	155	4	18123	0.0258065	0.285714	FB3	['GO:0061687', 'GO:1990169']	['MT1E', 'MT1M', 'MT1X', 'MT2A']
279	GO:BP	GO:1990169	stress response to copper ion	0.00963949	TRUE	"Any process that results in a change in state or activity of a cell or an organism (in terms of movement, secretion, enzyme production, gene expression, etc.) as a result of a disturbance in organismal or cellular homeostasis caused by a copper ion stimulus." [GOC:kmv, PMID:23437011]	14	155	4	18123	0.0258065	0.285714	FB3	['GO:0046688', 'GO:0097501']	['MT1E', 'MT1M', 'MT1X', 'MT2A']
280	GO:BP	GO:0001656	metanephros development	0.0101278	TRUE	"The process whose specific outcome is the progression of the metanephros over time, from its formation to the mature structure. In mammals, the metanephros is the excretory organ of the fetus, which develops into the mature kidney and is formed from the rear portion of the nephrogenic cord. The metanephros is an endocrine and metabolic organ that filters the blood and excretes the end products o…	87	92	6	18123	0.0652174	0.0689655	FB2	['GO:0001822']	['GPC3', 'HES1', 'ID3', 'PTCH1', 'ROBO2', 'WWTR1']
281	GO:BP	GO:0036230	granulocyte activation	0.0102379	TRUE	"The change in morphology and behavior of a granulocyte resulting from exposure to a cytokine, chemokine, cellular ligand, or soluble factor." [CL:0000094, GOC:nhn]	509	168	17	18123	0.10119	0.0333988	FB1	['GO:0002274']	['C3', 'CD55', 'CFD', 'CST3', 'CYB5R3', 'FTH1', 'FTL', 'GSN', 'LGALS3', 'MGST1', 'NPC2', 'S100A11', 'SDCBP', 'SLPI', 'TIMP2', 'TNFAIP6', 'VAT1']
282	GO:BP	GO:0002009	morphogenesis of an epithelium	0.0105096	TRUE	"The process in which the anatomical structures of epithelia are generated and organized. An epithelium consists of closely packed cells arranged in one or more layers, that covers the outer surfaces of the body or lines any internal cavity or tube." [GOC:dph, GOC:jl, GOC:tb, ISBN:0198506732]	566	92	13	18123	0.141304	0.0229682	FB2	['GO:0048729', 'GO:0060429']	['COL4A1', 'EDNRA', 'GPC3', 'HES1', 'KRT16', 'KRT17', 'LMO4', 'MAGED1', 'MDK', 'MEF2C', 'PTCH1', 'SOX4', 'WNT5A']
283	GO:BP	GO:0051346	negative regulation of hydrolase activity	0.0105835	TRUE	"Any process that stops or reduces the rate of hydrolase activity, the catalysis of the hydrolysis of various bonds." [GOC:ai]	456	168	16	18123	0.0952381	0.0350877	FB1	['GO:0043086', 'GO:0051336']	['C3', 'CST3', 'ECM1', 'LEPR', 'LGALS3', 'LRP1', 'PI16', 'SERPINF1', 'SERPING1', 'SFRP2', 'SLPI', 'SPOCK1', 'TFPI', 'TIMP1', 'TIMP2', 'TIMP3']
284	GO:BP	GO:0042127	regulation of cell population proliferation	0.0106056	TRUE	"Any process that modulates the frequency, rate or extent of cell proliferation." [GOC:jl]	1774	155	34	18123	0.219355	0.0191657	FB3	['GO:0008283', 'GO:0050794']	['APOE', 'ATF3', 'BMP4', 'BST2', 'BTG1', 'BTG2', 'CCL2', 'CDKN1C', 'CLDN5', 'COL18A1', 'CRIP2', 'EGR1', 'FGFR4', 'FRZB', 'GREM1', 'HES1', 'HLA-E', 'JUN', 'JUNB', 'KLF10', 'KLHL41', 'MIR24-2', 'MYC', 'NACA', 'NDRG2', 'NPM1', 'NPPC', 'RPS3', 'RPS4X', 'RPS6', 'RPS9', 'SERTAD1', 'SIRT2', 'ZFP36']
285	GO:BP	GO:0045667	regulation of osteoblast differentiation	0.0108311	TRUE	"Any process that modulates the frequency, rate or extent of osteoblast differentiation." [GOC:go_curators]	135	92	7	18123	0.076087	0.0518519	FB2	['GO:0001649', 'GO:0045595']	['ID3', 'MEF2C', 'PTCH1', 'SNAI2', 'TMEM119', 'TNN', 'WWTR1']
286	GO:BP	GO:0002252	immune effector process	0.0110359	TRUE	"Any process of the immune system that executes a component of an immune response. An effector immune process takes place after its activation." [GO_REF:0000022, GOC:add, ISBN:0781735149]	1135	168	27	18123	0.160714	0.0237885	FB1	['GO:0002376']	['C1R', 'C1S', 'C3', 'CD55', 'CD81', 'CFD', 'CFH', 'CLU', 'CST3', 'CYB5R3', 'FTH1', 'FTL', 'GSN', 'ITM2A', 'LGALS3', 'LRP1', 'MFAP4', 'MGST1', 'NPC2', 'S100A11', 'S100A13', 'SDCBP', 'SERPING1', 'SLPI', 'TIMP2', 'TNFAIP6', 'VAT1']
287	GO:BP	GO:0021953	central nervous system neuron differentiation	0.0110489	TRUE	"The process in which a relatively unspecialized cell acquires specialized features of a neuron whose cell body resides in the central nervous system." [GO_REF:0000021, GOC:cls, GOC:dgh, GOC:dph, GOC:jid]	191	92	8	18123	0.0869565	0.0418848	FB2	['GO:0007417', 'GO:0030182']	['CDH11', 'HES1', 'INHBA', 'LMO4', 'PTCH1', 'ROBO2', 'SOX4', 'WNT5A']
288	GO:BP	GO:0048585	negative regulation of response to stimulus	0.0110669	TRUE	"Any process that stops, prevents, or reduces the frequency, rate or extent of a response to a stimulus. Response to stimulus is a change in state or activity of a cell or an organism (in terms of movement, secretion, enzyme production, gene expression, etc.) as a result of a stimulus." [GOC:jid]	1938	168	38	18123	0.22619	0.0196078	FB1	['GO:0048519', 'GO:0048583', 'GO:0050896']	['ACKR3', 'ADM', 'APOD', 'CD34', 'CD55', 'CHRDL1', 'CLU', 'CTHRC1', 'CXCL12', 'DCN', 'ECM1', 'FBLN1', 'FBN1', 'FSTL1', 'IGFBP5', 'IGFBP6', 'IL6ST', 'ITGB1BP1', 'LEPROT', 'LGALS3', 'LRP1', 'NBL1', 'NT5E', 'PTGIS', 'RAMP2', 'SEMA3C', 'SERPINF1', 'SERPING1', 'SFRP2', 'SFRP4', 'SLIT3', 'TFPI', 'TGFBR3', 'TIMP2', 'TIMP3', 'TMSB4X', 'TNFAIP6', 'VASN']
289	GO:BP	GO:2000145	regulation of cell motility	0.0115424	TRUE	"Any process that modulates the frequency, rate or extent of cell motility." [GOC:mah]	1070	168	26	18123	0.154762	0.0242991	FB1	['GO:0040012', 'GO:0048870', 'GO:0051270']	['ACKR3', 'AKAP12', 'APOD', 'CD81', 'CXCL12', 'DCN', 'ECM1', 'FBLN1', 'GPNMB', 'IGFBP5', 'ITGB1BP1', 'LGALS3', 'LRP1', 'NBL1', 'PDGFD', 'PDGFRB', 'PODN', 'S100A11', 'SDCBP', 'SEMA3C', 'SERPINF1', 'SFRP2', 'TIMP1', 'TMSB4X', 'TNFAIP6', 'XG']
290	GO:BP	GO:0010033	response to organic substance	0.0115508	TRUE	"Any process that results in a change in state or activity of a cell or an organism (in terms of movement, secretion, enzyme production, gene expression, etc.) as a result of an organic substance stimulus." [GOC:sm, PMID:23356676]	3457	155	53	18123	0.341935	0.0153312	FB3	['GO:0042221']	['APOE', 'ATF3', 'BMP4', 'BST2', 'BTG1', 'BTG2', 'CA3', 'CCL2', 'CDKN1C', 'CLDN5', 'CXCR4', 'DAG1', 'DDIT4', 'EEF2', 'EGR1', 'EIF4A2', 'FGFR4', 'FOS', 'FOSB', 'GAPDH', 'GREM1', 'HES1', 'HEY1', 'HLA-E', 'HSP90AB1', 'IL32', 'IMPDH2', 'JUN', 'JUNB', 'KLF10', 'MAT2A', 'MIR24-2', 'MSC', 'MT1X', 'MT2A', 'MYC', 'NPM1', 'NPPC', 'PDK4', 'PEG10', 'PTPRE', 'RPL10A', 'RPL15', 'RPL3', 'RPLP0', 'RPS27A', 'RPS3…
291	GO:BP	GO:0007219	Notch signaling pathway	0.011929	TRUE	"A series of molecular signals initiated by the binding of an extracellular ligand to the receptor Notch on the surface of a target cell, and ending with regulation of a downstream cellular process, e.g. transcription." [GOC:go_curators, GOC:signaling]	193	92	8	18123	0.0869565	0.0414508	FB2	['GO:0007166']	['ENHO', 'HES1', 'HEY2', 'MDK', 'NOTCH3', 'POSTN', 'ROBO2', 'SNAI2']
292	GO:BP	GO:0048513	animal organ development	0.012203	TRUE	"Development of a tissue or tissues that work together to perform a specific function or functions. Development pertains to the process whose specific outcome is the progression of a structure over time, from its formation to the mature structure. Organs are commonly observed as visibly distinct structures, but may also exist as loosely associated clusters of cells that work together to perform a…	3701	168	59	18123	0.35119	0.0159416	FB1	['GO:0048731', 'GO:0048856']	['ABI3BP', 'ADM', 'AKR1C3', 'ANK2', 'APOD', 'AXL', 'CD248', 'CD34', 'CD81', 'CHRDL1', 'CLEC3B', 'CRIP1', 'CTHRC1', 'CTSK', 'CXCL12', 'DCN', 'ECM1', 'EFEMP1', 'ELN', 'FBN1', 'GPNMB', 'HSPG2', 'IGFBP5', 'ITGB1BP1', 'ITM2A', 'LEPR', 'LGALS3', 'LRP1', 'LY6E', 'MGP', 'MGST1', 'MMP2', 'NBL1', 'NTN4', 'NUPR1', 'OMD', 'OSR2', 'PAM', 'PDGFD', 'PDGFRB', 'PI16', 'PPL', 'RAMP2', 'RBPJ', 'SDCBP', 'SEMA3C', 'S…
293	GO:BP	GO:0006956	complement activation	0.0123044	TRUE	"Any process involved in the activation of any of the steps of the complement cascade, which allows for the direct killing of microbes, the disposal of immune complexes, and the regulation of other immune processes; the initial steps of complement activation involve one of three pathways, the classical pathway, the alternative pathway, and the lectin pathway, all of which lead to the terminal com…	178	168	10	18123	0.0595238	0.0561798	FB1	['GO:0002252', 'GO:0002253', 'GO:0006959']	['C1R', 'C1S', 'C3', 'CD55', 'CD81', 'CFD', 'CFH', 'CLU', 'MFAP4', 'SERPING1']
294	GO:BP	GO:0071310	cellular response to organic substance	0.0126951	TRUE	"Any process that results in a change in state or activity of a cell (in terms of movement, secretion, enzyme production, gene expression, etc.) as a result of an organic substance stimulus." [GOC:mah]	2821	155	46	18123	0.296774	0.0163063	FB3	['GO:0010033', 'GO:0070887']	['ATF3', 'BMP4', 'BST2', 'CCL2', 'CDKN1C', 'CLDN5', 'CXCR4', 'DAG1', 'DDIT4', 'EEF2', 'EGR1', 'EIF4A2', 'FGFR4', 'FOS', 'FOSB', 'GAPDH', 'GREM1', 'HES1', 'HEY1', 'HLA-E', 'HSP90AB1', 'IL32', 'IMPDH2', 'JUN', 'JUNB', 'KLF10', 'MAT2A', 'MIR24-2', 'MSC', 'MT1X', 'MT2A', 'MYC', 'NPM1', 'PDK4', 'PEG10', 'PTPRE', 'RPL3', 'RPLP0', 'RPS27A', 'RPS3', 'RXRG', 'SIRT2', 'SOCS3', 'TGIF1', 'UGCG', 'ZFP36']
295	GO:BP	GO:0035581	sequestering of extracellular ligand from receptor	0.012757	TRUE	"The process of binding or confining an extracellular signaling ligand, such that the ligand is unable to bind to its cell surface receptor." [GOC:BHF, GOC:signaling]	14	168	4	18123	0.0238095	0.285714	FB1	['GO:1900116']	['CHRDL1', 'FBN1', 'FSTL1', 'NBL1']
296	GO:BP	GO:0072073	kidney epithelium development	0.0131317	TRUE	"The process whose specific outcome is the progression of an epithelium in the kidney over time, from its formation to the mature structure. An epithelium is a tissue that covers the internal or external surfaces of an anatomical structure." [GOC:mtg_kidney_jan10]	139	92	7	18123	0.076087	0.0503597	FB2	['GO:0001822', 'GO:0060429']	['GPC3', 'HES1', 'MAGED1', 'MEF2C', 'PTCH1', 'ROBO2', 'WWTR1']
297	GO:BP	GO:0040034	regulation of development, heterochronic	0.0133853	TRUE	"Any process that modulates the consistent predetermined time point at which an integrated living unit or organism progresses from an initial condition to a later condition and the rate at which this time point is reached." [PMID:9442909]	8	92	3	18123	0.0326087	0.375	FB2	['GO:0050793']	['HES1', 'HMGN1', 'SERPINE2']
298	GO:BP	GO:0001775	cell activation	0.0144202	TRUE	"A change in the morphology or behavior of a cell resulting from exposure to an activating factor such as a cellular or soluble ligand." [GOC:mgi_curators]	1507	168	32	18123	0.190476	0.0212342	FB1	['GO:0009987']	['AKAP12', 'AXL', 'C3', 'CD55', 'CD81', 'CFD', 'CLU', 'CST3', 'CYB5R3', 'FTH1', 'FTL', 'GPNMB', 'GSN', 'IL6ST', 'ITM2A', 'JUND', 'LEPR', 'LGALS3', 'LRP1', 'MGST1', 'NDRG1', 'NPC2', 'PDGFRB', 'RBPJ', 'S100A11', 'S100A13', 'SDCBP', 'SLPI', 'TIMP1', 'TIMP2', 'TNFAIP6', 'VAT1']
299	GO:BP	GO:0010942	positive regulation of cell death	0.0144503	TRUE	"Any process that increases the rate or frequency of cell death. Cell death is the specific activation or halting of processes within a cell so that its vital functions markedly cease, rather than simply deteriorating gradually over time, which culminates in cell death." [GOC:dph, GOC:tb]	691	155	19	18123	0.122581	0.0274964	FB3	['GO:0008219', 'GO:0010941', 'GO:0048522']	['ATF3', 'BMP4', 'BTG1', 'CCL2', 'DDIT4', 'EGR1', 'FOS', 'FRZB', 'GADD45B', 'JUN', 'MIR24-2', 'NET1', 'RAPSN', 'RPL26', 'RPS27A', 'RPS3', 'RPS6', 'SIRT2', 'TPD52L1']
300	GO:BP	GO:0071560	cellular response to transforming growth factor beta stimulus	0.0145554	TRUE	"Any process that results in a change in state or activity of a cell (in terms of movement, secretion, enzyme production, gene expression, etc.) as a result of a transforming growth factor beta stimulus." [GOC:ecd, PMID:15451575]	263	92	9	18123	0.0978261	0.0342205	FB2	['GO:0071363', 'GO:0071495', 'GO:0071559']	['ASPN', 'COL1A1', 'COL1A2', 'COL3A1', 'COL4A2', 'DKK3', 'MEF2C', 'POSTN', 'WNT5A']
301	GO:BP	GO:0001706	endoderm formation	0.0150966	TRUE	"The formation of the endoderm during gastrulation." [GOC:go_curators]	54	92	5	18123	0.0543478	0.0925926	FB2	['GO:0001704', 'GO:0007492']	['COL11A1', 'COL4A2', 'COL5A2', 'COL6A1', 'INHBA']
302	GO:BP	GO:0002443	leukocyte mediated immunity	0.015211	TRUE	"Any process involved in the carrying out of an immune response by a leukocyte." [GO_REF:0000022, GOC:add, ISBN:0781735149]	888	168	23	18123	0.136905	0.0259009	FB1	['GO:0002252']	['C1R', 'C1S', 'C3', 'CD55', 'CD81', 'CFD', 'CLU', 'CST3', 'CYB5R3', 'FTH1', 'FTL', 'GSN', 'LGALS3', 'MGST1', 'NPC2', 'S100A11', 'S100A13', 'SDCBP', 'SERPING1', 'SLPI', 'TIMP2', 'TNFAIP6', 'VAT1']
303	GO:BP	GO:1901564	organonitrogen compound metabolic process	0.0155476	TRUE	"The chemical reactions and pathways involving organonitrogen compound." [GOC:pr, GOC:TermGenie]	6904	155	86	18123	0.554839	0.0124565	FB3	['GO:0006807', 'GO:0071704']	['ALDOA', 'APOC1', 'APOE', 'ATF3', 'BMP4', 'BST2', 'BTG1', 'BTG2', 'CCL2', 'CDKN1C', 'CIRBP', 'CXCR4', 'DAG1', 'DDIT4', 'EEF2', 'EGR1', 'EIF3L', 'EIF4A2', 'FABP5', 'FBL', 'FGFR4', 'GADD45B', 'GAPDH', 'GREM1', 'HES1', 'HSP90AB1', 'IMPDH2', 'KLHL41', 'MIR24-2', 'MYC', 'NACA', 'NPM1', 'NPPC', 'NUDT14', 'PDK4', 'PPP1R14B', 'PTPRE', 'RPL10', 'RPL10A', 'RPL12', 'RPL13', 'RPL15', 'RPL17', 'RPL18', 'RPL2…
304	GO:BP	GO:0060993	kidney morphogenesis	0.0158719	TRUE	"Morphogenesis of a kidney. A kidney is an organ that filters the blood and excretes the end products of body metabolism in the form of urine." [GOC:dph, GOC:mtg_kidney_jan10]	94	92	6	18123	0.0652174	0.0638298	FB2	['GO:0001822', 'GO:0009887']	['GPC3', 'HES1', 'MAGED1', 'PTCH1', 'SOX4', 'WWTR1']
305	GO:BP	GO:0072080	nephron tubule development	0.0158719	TRUE	"The progression of a nephron tubule over time, from its initial formation to the mature structure. A nephron tubule is an epithelial tube that is part of the nephron, the functional part of the kidney." [GOC:mtg_kidney_jan10]	94	92	6	18123	0.0652174	0.0638298	FB2	['GO:0061326', 'GO:0072009']	['GPC3', 'HES1', 'MAGED1', 'MEF2C', 'PTCH1', 'WWTR1']
306	GO:BP	GO:0031328	positive regulation of cellular biosynthetic process	0.0164777	TRUE	"Any process that activates or increases the frequency, rate or extent of the chemical reactions and pathways resulting in the formation of substances, carried out by individual cells." [GOC:mah]	1976	155	36	18123	0.232258	0.0182186	FB3	['GO:0009891', 'GO:0031325', 'GO:0031326', 'GO:0044249']	['ADIRF', 'APOE', 'ATF3', 'BMP4', 'CDKN1C', 'CHCHD10', 'CIRBP', 'CSRNP1', 'EEF2', 'EGR1', 'FGFR4', 'FOS', 'FOSB', 'GREM1', 'HES1', 'HEY1', 'HSP90AB1', 'JUN', 'JUNB', 'KLF10', 'MAFF', 'MYC', 'MYF5', 'MYF6', 'NACA', 'NOTCH3', 'NPM1', 'PITX2', 'RPL26', 'RPL5', 'RPS27A', 'RPS4X', 'RPS9', 'RXRG', 'SERTAD1', 'SIRT2']
307	GO:BP	GO:0060350	endochondral bone morphogenesis	0.01654	TRUE	"The process in which bones are generated and organized as a result of the conversion of initial cartilaginous anlage into bone." [GOC:dph, PMID:11680679]	55	92	5	18123	0.0543478	0.0909091	FB2	['GO:0060349']	['ALPL', 'COL1A1', 'MEF2C', 'SERPINH1', 'TMEM119']
308	GO:BP	GO:0003179	heart valve morphogenesis	0.01654	TRUE	"The process in which the structure of a heart valve is generated and organized." [GOC:mtg_heart]	55	92	5	18123	0.0543478	0.0909091	FB2	['GO:0003170', 'GO:0009653']	['HEY2', 'MEF2C', 'ROBO2', 'SNAI2', 'SOX4']
309	GO:BP	GO:0040007	growth	0.0179087	TRUE	"The increase in size or mass of an entire organism, a part of an organism or a cell." [GOC:bf, GOC:ma]	973	155	23	18123	0.148387	0.0236382	FB3	['GO:0008150']	['APOE', 'BMP4', 'BST2', 'BTG1', 'CHRNA1', 'CXCR4', 'DAG1', 'FRZB', 'GREM1', 'HSP90AB1', 'MIR24-2', 'MT1E', 'MT1M', 'MT1X', 'MT2A', 'MYF6', 'NACA', 'NET1', 'NPM1', 'NPPC', 'SERTAD1', 'SGCA', 'SOCS3']
310	GO:BP	GO:0033273	response to vitamin	0.0179251	TRUE	"Any process that results in a change in state or activity of a cell or an organism (in terms of movement, secretion, enzyme production, gene expression, etc.) as a result of a vitamin stimulus." [GOC:sl]	96	92	6	18123	0.0652174	0.0625	FB2	['GO:0007584']	['ALPL', 'CCND1', 'COL1A1', 'POSTN', 'SNAI2', 'SPARC']
311	GO:BP	GO:0032964	collagen biosynthetic process	0.0180892	TRUE	"The chemical reactions and pathways resulting in the formation of collagen, any of a group of fibrous proteins of very high tensile strength that form the main component of connective tissue in animals. Collagen is highly enriched in glycine (some regions are 33% glycine) and proline, occurring predominantly as 3-hydroxyproline (about 20%)." [GOC:mah, ISBN:0198506732]	56	92	5	18123	0.0543478	0.0892857	FB2	['GO:0009058', 'GO:0032963']	['COL1A1', 'CREB3L1', 'F2R', 'SERPINH1', 'VIM']
312	GO:BP	GO:0051179	localization	0.0191072	TRUE	"Any process in which a cell, a substance, or a cellular entity, such as a protein complex or organelle, is transported, tethered to or otherwise maintained in a specific location. In the case of substances, localization may also be achieved via selective degradation." [GOC:ai, GOC:dos]	6938	168	92	18123	0.547619	0.0132603	FB1	['GO:0008150']	['ACKR3', 'ACKR4', 'ADD3', 'ADM', 'AHNAK', 'AKAP12', 'AKR1C1', 'ANK2', 'APOD', 'AXL', 'C3', 'CD248', 'CD34', 'CD55', 'CD81', 'CFD', 'CLEC3B', 'CLTB', 'CLU', 'CST3', 'CTHRC1', 'CXCL12', 'CYB5R3', 'CYBRD1', 'DBN1', 'DCN', 'ECM1', 'FBLN1', 'FBLN5', 'FBN1', 'FSTL1', 'FTH1', 'FTL', 'GAS1', 'GPNMB', 'GSN', 'GYPC', 'HSD3B7', 'HSPG2', 'IGFBP5', 'IGFBP6', 'ISLR', 'ITGB1BP1', 'LEPR', 'LEPROT', 'LGALS3', 'L…
313	GO:BP	GO:0001958	endochondral ossification	0.0191921	TRUE	"Replacement ossification wherein bone tissue replaces cartilage." [GO_REF:0000034, ISBN:0878932437]	27	92	4	18123	0.0434783	0.148148	FB2	['GO:0036075', 'GO:0060350']	['ALPL', 'COL1A1', 'MEF2C', 'TMEM119']
314	GO:BP	GO:0036075	replacement ossification	0.0191921	TRUE	"Ossification that requires the replacement of a preexisting tissue prior to bone tissue formation." [GO_REF:0000034]	27	92	4	18123	0.0434783	0.148148	FB2	['GO:0001503']	['ALPL', 'COL1A1', 'MEF2C', 'TMEM119']
315	GO:BP	GO:0006810	transport	0.0197361	TRUE	"The directed movement of substances (such as macromolecules, small molecules, ions) or cellular components (such as complexes and organelles) into, out of or within a cell, or between cells, or within a multicellular organism by means of some agent such as a transporter, pore or motor protein." [GOC:dos, GOC:dph, GOC:jl, GOC:mah]	5214	155	70	18123	0.451613	0.0134254	FB3	['GO:0051234']	['ALDOA', 'APOC1', 'APOE', 'BMP4', 'BST2', 'CA3', 'CCL2', 'CHCHD10', 'CHRNA1', 'CLCN5', 'CXCR4', 'EEF2', 'FABP5', 'FXYD6', 'GPM6B', 'GREM1', 'HSP90AB1', 'IMPDH2', 'JSRP1', 'KCNN3', 'MIDN', 'MYC', 'NACA', 'NPM1', 'RPL10', 'RPL10A', 'RPL12', 'RPL13', 'RPL15', 'RPL17', 'RPL18', 'RPL21', 'RPL23A', 'RPL24', 'RPL26', 'RPL3', 'RPL32', 'RPL34', 'RPL36A', 'RPL4', 'RPL41', 'RPL5', 'RPL6', 'RPL7', 'RPL7A', …
316	GO:BP	GO:0048519	negative regulation of biological process	0.0198063	TRUE	"Any process that stops, prevents, or reduces the frequency, rate or extent of a biological process. Biological processes are regulated by many means; examples include the control of gene expression, protein modification or interaction with a protein or substrate molecule." [GOC:jid]	5861	92	50	18123	0.543478	0.00853097	FB2	['GO:0008150', 'GO:0050789']	['ADAMTS18', 'ASPN', 'CCND1', 'COL1A1', 'COL3A1', 'COL4A2', 'COL5A2', 'COL6A3', 'CREB3L1', 'DKK3', 'DPEP1', 'EDNRB', 'F2R', 'GEM', 'GPC3', 'HES1', 'HEY2', 'HNRNPA1', 'ID3', 'INHBA', 'KRT16', 'LMO4', 'MAGED1', 'MDK', 'MEF2C', 'NOTCH3', 'NPM1', 'PABPC1', 'PLK2', 'POSTN', 'PPP1R14A', 'PTCH1', 'PTGER3', 'PTMA', 'RBP4', 'ROBO2', 'SERPINE2', 'SERPINH1', 'SNAI2', 'SOX4', 'SPARC', 'STMN1', 'STMN2', 'TMEM…
317	GO:BP	GO:0042221	response to chemical	0.020481	TRUE	"Any process that results in a change in state or activity of a cell or an organism (in terms of movement, secretion, enzyme production, gene expression, etc.) as a result of a chemical stimulus." [GOC:jl]	4829	92	44	18123	0.478261	0.00911162	FB2	['GO:0050896']	['ALPL', 'ASPN', 'CCND1', 'COL1A1', 'COL1A2', 'COL3A1', 'COL4A1', 'COL4A2', 'COL5A2', 'COL6A1', 'CREB3L1', 'DKK3', 'DPEP1', 'EDNRB', 'ENPP2', 'F2R', 'FSCN1', 'GPC3', 'HES1', 'HNRNPA1', 'ID3', 'IL11RA', 'INHBA', 'LUM', 'MDK', 'MEF2C', 'MXRA5', 'NOTCH3', 'NPM1', 'PALLD', 'POSTN', 'PTCH1', 'RAB13', 'RBP4', 'ROBO2', 'SERPINH1', 'SNAI2', 'SOX4', 'SPARC', 'STMN2', 'TNMD', 'UGT3A2', 'VIM', 'WNT5A']
318	GO:BP	GO:0040007	growth	0.0214459	TRUE	"The increase in size or mass of an entire organism, a part of an organism or a cell." [GOC:bf, GOC:ma]	973	168	24	18123	0.142857	0.024666	FB1	['GO:0008150']	['ADM', 'APOD', 'CD81', 'CXCL12', 'DBN1', 'ECM1', 'FBLN5', 'GAS1', 'GSN', 'IGFBP5', 'IGFBP7', 'LEPR', 'LRP1', 'LTBP4', 'LY6E', 'PDGFRB', 'PI16', 'RBPJ', 'SDCBP', 'SEMA3C', 'SFRP2', 'SLIT3', 'SPOCK1', 'TGFBR3']
319	GO:BP	GO:0061687	detoxification of inorganic compound	0.0224649	TRUE	"Any process that reduces or removes the toxicity of inorganic compounds. These include transport of such compounds away from sensitive areas and to compartments or complexes whose purpose is sequestration of inorganic compounds." [GOC:vw]	17	155	4	18123	0.0258065	0.235294	FB3	['GO:0098754']	['MT1E', 'MT1M', 'MT1X', 'MT2A']
320	GO:BP	GO:0048741	skeletal muscle fiber development	0.02264	TRUE	"The process whose specific outcome is the progression of the skeletal muscle fiber over time, from its formation to the mature structure. Muscle fibers are formed by the maturation of myotubes. They can be classed as slow, intermediate/fast or fast." [GOC:dph, GOC:ef, GOC:jid, GOC:lm, GOC:mtg_muscle]	35	155	5	18123	0.0322581	0.142857	FB3	['GO:0007519', 'GO:0014904']	['KLHL41', 'MYF5', 'MYF6', 'NACA', 'STAC3']
321	GO:BP	GO:0071495	cellular response to endogenous stimulus	0.0226506	TRUE	"Any process that results in a change in state or activity of a cell (in terms of movement, secretion, enzyme production, gene expression, etc.) as a result of a stimulus arising within the organism." [GOC:mah]	1467	168	31	18123	0.184524	0.0211316	FB1	['GO:0009719']	['AKR1C1', 'AKR1C2', 'AKR1C3', 'CHRDL1', 'CLEC3B', 'FBN1', 'FSTL1', 'IGFBP5', 'IGFBP7', 'ITGB1BP1', 'LEPR', 'LEPROT', 'LRP1', 'LTBP2', 'LTBP4', 'MMP2', 'NBL1', 'PDGFD', 'PDGFRB', 'POLR2L', 'RAMP2', 'RBPJ', 'SDCBP', 'SERPINF1', 'SFRP2', 'SFRP4', 'SLIT3', 'TFPI', 'TGFBR3', 'VASN', 'YWHAH']
322	GO:BP	GO:1900116	extracellular negative regulation of signal transduction	0.0228607	TRUE	"Any negative regulation of signal transduction that takes place in extracellular region." [GOC:signaling, GOC:TermGenie]	16	168	4	18123	0.0238095	0.25	FB1	['GO:0009968', 'GO:1900115']	['CHRDL1', 'FBN1', 'FSTL1', 'NBL1']
323	GO:BP	GO:1900115	extracellular regulation of signal transduction	0.0228607	TRUE	"Any regulation of signal transduction that takes place in the extracellular region." [GOC:signaling, GOC:TermGenie]	16	168	4	18123	0.0238095	0.25	FB1	['GO:0009966']	['CHRDL1', 'FBN1', 'FSTL1', 'NBL1']
324	GO:BP	GO:0070887	cellular response to chemical stimulus	0.0230891	TRUE	"Any process that results in a change in state or activity of a cell (in terms of movement, secretion, enzyme production, gene expression, etc.) as a result of a chemical stimulus." [GOC:mah]	3443	155	52	18123	0.335484	0.0151031	FB3	['GO:0042221', 'GO:0051716']	['ADIRF', 'APOE', 'ATF3', 'BMP4', 'BST2', 'CCL2', 'CDKN1C', 'CLDN5', 'CXCR4', 'DAG1', 'DDIT4', 'EEF2', 'EGR1', 'EIF4A2', 'FGFR4', 'FOS', 'FOSB', 'GAPDH', 'GREM1', 'HES1', 'HEY1', 'HLA-E', 'HSP90AB1', 'IL32', 'IMPDH2', 'JUN', 'JUNB', 'KLF10', 'MAT2A', 'MIR24-2', 'MSC', 'MT1E', 'MT1M', 'MT1X', 'MT2A', 'MYC', 'NET1', 'NPM1', 'PDK4', 'PEG10', 'PTPRE', 'RPL3', 'RPLP0', 'RPS19', 'RPS27A', 'RPS3', 'RXRG…
325	GO:BP	GO:0040012	regulation of locomotion	0.023161	TRUE	"Any process that modulates the frequency, rate or extent of locomotion of a cell or organism." [GOC:ems]	1113	168	26	18123	0.154762	0.0233603	FB1	['GO:0040011', 'GO:0050789']	['ACKR3', 'AKAP12', 'APOD', 'CD81', 'CXCL12', 'DCN', 'ECM1', 'FBLN1', 'GPNMB', 'IGFBP5', 'ITGB1BP1', 'LGALS3', 'LRP1', 'NBL1', 'PDGFD', 'PDGFRB', 'PODN', 'S100A11', 'SDCBP', 'SEMA3C', 'SERPINF1', 'SFRP2', 'TIMP1', 'TMSB4X', 'TNFAIP6', 'XG']
326	GO:BP	GO:0048583	regulation of response to stimulus	0.0233166	TRUE	"Any process that modulates the frequency, rate or extent of a response to a stimulus. Response to stimulus is a change in state or activity of a cell or an organism (in terms of movement, secretion, enzyme production, gene expression, etc.) as a result of a stimulus." [GOC:jid]	4416	168	66	18123	0.392857	0.0149457	FB1	['GO:0050789', 'GO:0050896']	['ACKR3', 'ADM', 'AKAP12', 'AKR1C2', 'AKR1C3', 'APOD', 'AXL', 'C1R', 'C1S', 'C3', 'CD34', 'CD55', 'CD81', 'CFD', 'CFH', 'CHRDL1', 'CLU', 'CTHRC1', 'CXCL12', 'DCN', 'ECM1', 'FBLN1', 'FBLN5', 'FBN1', 'FSTL1', 'GAS1', 'GPNMB', 'GPX4', 'IGFBP5', 'IGFBP6', 'IGFBP7', 'IL6ST', 'ITGB1BP1', 'LEPROT', 'LGALS3', 'LRP1', 'LTBP4', 'LY6E', 'MFAP4', 'NBL1', 'NT5E', 'NUPR1', 'PDGFD', 'PDGFRB', 'PI16', 'PTGES', '…
327	GO:BP	GO:0071310	cellular response to organic substance	0.024166	TRUE	"Any process that results in a change in state or activity of a cell (in terms of movement, secretion, enzyme production, gene expression, etc.) as a result of an organic substance stimulus." [GOC:mah]	2821	168	48	18123	0.285714	0.0170152	FB1	['GO:0010033', 'GO:0070887']	['ACKR3', 'ACKR4', 'AKAP12', 'AKR1C1', 'AKR1C2', 'AKR1C3', 'AXL', 'CD55', 'CHRDL1', 'CLEC3B', 'CLU', 'CXCL12', 'DCN', 'ECM1', 'FBN1', 'FSTL1', 'GAS1', 'GSN', 'IGFBP5', 'IGFBP7', 'IL6ST', 'ITGB1BP1', 'LEPR', 'LEPROT', 'LRP1', 'LTBP2', 'LTBP4', 'MGST1', 'MMP2', 'NBL1', 'PCOLCE2', 'PDGFD', 'PDGFRB', 'POLR2L', 'PTGIS', 'RAMP2', 'RBPJ', 'SDCBP', 'SERPINF1', 'SFRP2', 'SFRP4', 'SLIT3', 'TFPI', 'TGFBR3',…
328	GO:BP	GO:0002366	leukocyte activation involved in immune response	0.024402	TRUE	"A change in morphology and behavior of a leukocyte resulting from exposure to a specific antigen, mitogen, cytokine, cellular ligand, or soluble factor, leading to the initiation or perpetuation of an immune response." [GOC:add, ISBN:0781735149]	723	168	20	18123	0.119048	0.0276625	FB1	['GO:0002263', 'GO:0045321']	['C3', 'CD55', 'CD81', 'CFD', 'CST3', 'CYB5R3', 'FTH1', 'FTL', 'GSN', 'ITM2A', 'LGALS3', 'MGST1', 'NPC2', 'S100A11', 'S100A13', 'SDCBP', 'SLPI', 'TIMP2', 'TNFAIP6', 'VAT1']
329	GO:BP	GO:0048754	branching morphogenesis of an epithelial tube	0.0256877	TRUE	"The process in which the anatomical structures of branches in an epithelial tube are generated and organized. A tube is a long hollow cylinder." [GOC:dgh, GOC:dph, GOC:jid]	154	92	7	18123	0.076087	0.0454545	FB2	['GO:0035239', 'GO:0060562', 'GO:0061138']	['COL4A1', 'EDNRA', 'GPC3', 'MAGED1', 'MDK', 'PTCH1', 'WNT5A']
330	GO:BP	GO:0008284	positive regulation of cell population proliferation	0.0262589	TRUE	"Any process that activates or increases the rate or extent of cell proliferation." [GOC:go_curators]	985	168	24	18123	0.142857	0.0243655	FB1	['GO:0008283', 'GO:0042127', 'GO:0048522']	['ADM', 'AKR1C2', 'AKR1C3', 'CD248', 'CD55', 'CD81', 'CTHRC1', 'CXCL12', 'ECM1', 'FBLN1', 'IGFBP5', 'IL6ST', 'ITGB1BP1', 'MMP2', 'OSR2', 'PDGFD', 'PDGFRB', 'RBPJ', 'S100A13', 'S100A6', 'SDCBP', 'SFRP2', 'TGFBR3', 'TIMP1']
331	GO:BP	GO:0051234	establishment of localization	0.0272098	TRUE	"Any process that localizes a substance or cellular component. This may occur via movement, tethering or selective degradation." [GOC:ai, GOC:dos]	5364	155	71	18123	0.458065	0.0132364	FB3	['GO:0051179']	['ALDOA', 'APOC1', 'APOE', 'BMP4', 'BST2', 'CA3', 'CCL2', 'CHCHD10', 'CHRNA1', 'CLCN5', 'CXCR4', 'EEF2', 'FABP5', 'FXYD6', 'GPM6B', 'GREM1', 'HSP90AB1', 'IMPDH2', 'JSRP1', 'KCNN3', 'MIDN', 'MYC', 'NACA', 'NPM1', 'RAPSN', 'RPL10', 'RPL10A', 'RPL12', 'RPL13', 'RPL15', 'RPL17', 'RPL18', 'RPL21', 'RPL23A', 'RPL24', 'RPL26', 'RPL3', 'RPL32', 'RPL34', 'RPL36A', 'RPL4', 'RPL41', 'RPL5', 'RPL6', 'RPL7', …
332	GO:BP	GO:0007568	aging	0.0272728	TRUE	"A developmental process that is a deterioration and loss of function over time. Aging includes loss of functions such as resistance to disease, homeostasis, and fertility, as well as wear and tear. Aging includes cellular senescence, but is more inclusive. May precede death and may succeed developmental maturation (GO:0021700)." [GOC:PO_curators]	333	168	13	18123	0.077381	0.039039	FB1	['GO:0032502']	['ADM', 'APOD', 'DCN', 'GPX4', 'GSN', 'IGFBP5', 'JUND', 'LRP1', 'PDGFRB', 'SERPINF1', 'SERPING1', 'TIMP1', 'TIMP2']
333	GO:BP	GO:0048514	blood vessel morphogenesis	0.027295	TRUE	"The process in which the anatomical structures of blood vessels are generated and organized. The blood vessel is the vasculature carrying blood." [GOC:jid]	715	92	14	18123	0.152174	0.0195804	FB2	['GO:0001568', 'GO:0035239']	['CALD1', 'COL4A1', 'COL4A2', 'CREB3L1', 'EDNRA', 'ENPP2', 'HES1', 'HEY2', 'MDK', 'PLK2', 'SOX4', 'SPARC', 'TNMD', 'WNT5A']
334	GO:BP	GO:0071345	cellular response to cytokine stimulus	0.0286517	TRUE	"Any process that results in a change in state or activity of a cell (in terms of movement, secretion, enzyme production, gene expression, etc.) as a result of a cytokine stimulus." [GOC:mah]	1148	155	25	18123	0.16129	0.021777	FB3	['GO:0034097', 'GO:0071310']	['BST2', 'CCL2', 'CXCR4', 'EGR1', 'EIF4A2', 'FOS', 'GAPDH', 'HLA-E', 'HSP90AB1', 'IL32', 'IMPDH2', 'JUNB', 'MAT2A', 'MIR24-2', 'MSC', 'MT1X', 'MT2A', 'MYC', 'RPL3', 'RPLP0', 'RPS27A', 'RPS3', 'SOCS3', 'UGCG', 'ZFP36']
335	GO:BP	GO:0097501	stress response to metal ion	0.0286915	TRUE	"Any process that results in a change in state or activity of a cell or an organism (in terms of movement, secretion, enzyme production, gene expression, etc.) as a result of a disturbance in organismal or cellular homeostasis caused by a metal ion stimulus." [GOC:kmv]	18	155	4	18123	0.0258065	0.222222	FB3	['GO:0006950', 'GO:0010038']	['MT1E', 'MT1M', 'MT1X', 'MT2A']
336	GO:BP	GO:1901700	response to oxygen-containing compound	0.0289169	TRUE	"Any process that results in a change in state or activity of a cell or an organism (in terms of movement, secretion, enzyme production, gene expression, etc.) as a result of an oxygen-containing compound stimulus." [GOC:pr, GOC:TermGenie]	1748	92	23	18123	0.25	0.0131579	FB2	['GO:0042221']	['ALPL', 'CCND1', 'COL1A1', 'COL1A2', 'COL4A1', 'COL5A2', 'COL6A1', 'DPEP1', 'EDNRB', 'F2R', 'ID3', 'INHBA', 'MEF2C', 'POSTN', 'PTCH1', 'RAB13', 'RBP4', 'SNAI2', 'SOX4', 'SPARC', 'UGT3A2', 'VIM', 'WNT5A']
337	GO:BP	GO:0070887	cellular response to chemical stimulus	0.0293571	TRUE	"Any process that results in a change in state or activity of a cell (in terms of movement, secretion, enzyme production, gene expression, etc.) as a result of a chemical stimulus." [GOC:mah]	3443	92	35	18123	0.380435	0.0101656	FB2	['GO:0042221', 'GO:0051716']	['ALPL', 'ASPN', 'CCND1', 'COL1A1', 'COL1A2', 'COL3A1', 'COL4A1', 'COL4A2', 'COL5A2', 'COL6A1', 'CREB3L1', 'DKK3', 'DPEP1', 'EDNRB', 'FSCN1', 'GPC3', 'HES1', 'HNRNPA1', 'ID3', 'IL11RA', 'INHBA', 'MDK', 'MEF2C', 'NPM1', 'POSTN', 'PTCH1', 'RAB13', 'ROBO2', 'SNAI2', 'SOX4', 'STMN2', 'TNMD', 'UGT3A2', 'VIM', 'WNT5A']
338	GO:BP	GO:1905049	negative regulation of metallopeptidase activity	0.029679	TRUE	"Any process that stops, prevents or reduces the frequency, rate or extent of metallopeptidase activity." [GO_REF:0000059, GOC:TermGenie, PMID:26473732]	17	168	4	18123	0.0238095	0.235294	FB1	['GO:0010466', 'GO:1905048']	['LRP1', 'TIMP1', 'TIMP2', 'TIMP3']
339	GO:BP	GO:0003279	cardiac septum development	0.0334176	TRUE	"The progression of a cardiac septum over time, from its initial formation to the mature structure." [GOC:mtg_heart]	107	92	6	18123	0.0652174	0.0560748	FB2	['GO:0003205', 'GO:0048856']	['HES1', 'HEY2', 'LMO4', 'ROBO2', 'SOX4', 'WNT5A']
340	GO:BP	GO:0048008	platelet-derived growth factor receptor signaling pathway	0.0334839	TRUE	"The series of molecular signals generated as a consequence of a platelet-derived growth factor receptor binding to one of its physiological ligands." [GOC:ceb]	59	168	6	18123	0.0357143	0.101695	FB1	['GO:0007169']	['APOD', 'LRP1', 'PDGFD', 'PDGFRB', 'PDGFRL', 'TXNIP']
341	GO:BP	GO:0071363	cellular response to growth factor stimulus	0.0347921	TRUE	"Any process that results in a change in state or activity of a cell (in terms of movement, secretion, enzyme production, gene expression, etc.) as a result of a growth factor stimulus." [GOC:mah]	741	168	20	18123	0.119048	0.0269906	FB1	['GO:0070848', 'GO:0071310']	['CHRDL1', 'CLEC3B', 'DCN', 'FBN1', 'FSTL1', 'GAS1', 'ITGB1BP1', 'LTBP2', 'LTBP4', 'NBL1', 'PDGFD', 'PDGFRB', 'POLR2L', 'RAMP2', 'RBPJ', 'SDCBP', 'SFRP2', 'SFRP4', 'TGFBR3', 'VASN']
342	GO:BP	GO:0002062	chondrocyte differentiation	0.0352399	TRUE	"The process in which a chondroblast acquires specialized structural and/or functional features of a chondrocyte. A chondrocyte is a polymorphic cell that forms cartilage." [GOC:dph]	108	92	6	18123	0.0652174	0.0555556	FB2	['GO:0030154', 'GO:0051216']	['COL11A1', 'MDK', 'MEF2C', 'SERPINH1', 'SNAI2', 'TRPS1']
343	GO:BP	GO:0120254	olefinic compound metabolic process	0.0369982	TRUE	"The chemical reactions and pathways involving an olefinic compound, any compound which contains a carbon-carbon double bond (aka C=C)." [GOC:krc]	123	168	8	18123	0.047619	0.0650407	FB1	['GO:0071704']	['ADM', 'AKR1C1', 'AKR1C2', 'AKR1C3', 'EPHX1', 'GPX4', 'PTGES', 'PTGIS']
344	GO:BP	GO:0030168	platelet activation	0.0371302	TRUE	"A series of progressive, overlapping events triggered by exposure of the platelets to subendothelial tissue. These events include shape change, adhesiveness, aggregation, and release reactions. When carried through to completion, these events lead to the formation of a stable hemostatic plug." [http://www.graylab.ac.uk/omd/]	163	92	7	18123	0.076087	0.0429448	FB2	['GO:0001775', 'GO:0007596']	['ADAMTS18', 'COL1A1', 'COL1A2', 'COL3A1', 'F2R', 'F2RL2', 'SERPINE2']
345	GO:BP	GO:0034097	response to cytokine	0.0375232	TRUE	"Any process that results in a change in state or activity of a cell or an organism (in terms of movement, secretion, enzyme production, gene expression, etc.) as a result of a cytokine stimulus." [GOC:sl]	1242	155	26	18123	0.167742	0.020934	FB3	['GO:0010033']	['BST2', 'CCL2', 'CXCR4', 'EGR1', 'EIF4A2', 'FOS', 'GAPDH', 'HLA-E', 'HSP90AB1', 'IL32', 'IMPDH2', 'JUN', 'JUNB', 'MAT2A', 'MIR24-2', 'MSC', 'MT1X', 'MT2A', 'MYC', 'RPL3', 'RPLP0', 'RPS27A', 'RPS3', 'SOCS3', 'UGCG', 'ZFP36']
346	GO:BP	GO:0003170	heart valve development	0.0377346	TRUE	"The progression of a heart valve over time, from its formation to the mature structure. A heart valve is a structure that restricts the flow of blood to different regions of the heart and forms from an endocardial cushion." [GOC:mtg_heart]	65	92	5	18123	0.0543478	0.0769231	FB2	['GO:0007507', 'GO:0048856']	['HEY2', 'MEF2C', 'ROBO2', 'SNAI2', 'SOX4']
347	GO:BP	GO:0042448	progesterone metabolic process	0.0378833	TRUE	"The chemical reactions and pathways involving progesterone, a steroid hormone produced in the ovary which prepares and maintains the uterus for pregnancy. Also found in plants." [GOC:jl, http://www.cogsci.princeton.edu/]	18	168	4	18123	0.0238095	0.222222	FB1	['GO:0008207', 'GO:0042180', 'GO:0120254']	['ADM', 'AKR1C1', 'AKR1C2', 'AKR1C3']
348	GO:BP	GO:0007178	transmembrane receptor protein serine/threonine kinase signaling pathway	0.0383075	TRUE	"A series of molecular signals initiated by the binding of an extracellular ligand to a receptor on the surface of the target cell where the receptor possesses serine/threonine kinase activity, and ending with regulation of a downstream cellular process, e.g. transcription." [GOC:mah, GOC:signaling]	374	92	10	18123	0.108696	0.026738	FB2	['GO:0007167']	['ASPN', 'COL1A2', 'COL3A1', 'DKK3', 'GPC3', 'HES1', 'INHBA', 'VIM', 'WNT5A', 'WWTR1']
349	GO:BP	GO:0071363	cellular response to growth factor stimulus	0.0384625	TRUE	"Any process that results in a change in state or activity of a cell (in terms of movement, secretion, enzyme production, gene expression, etc.) as a result of a growth factor stimulus." [GOC:mah]	741	155	19	18123	0.122581	0.025641	FB3	['GO:0070848', 'GO:0071310']	['BMP4', 'CCL2', 'CDKN1C', 'CLDN5', 'DDIT4', 'EEF2', 'EGR1', 'FGFR4', 'FOS', 'GREM1', 'HES1', 'HSP90AB1', 'JUN', 'MYC', 'PEG10', 'RPS27A', 'SIRT2', 'TGIF1', 'ZFP36']
350	GO:BP	GO:0044260	cellular macromolecule metabolic process	0.038975	TRUE	"The chemical reactions and pathways involving macromolecules, any molecule of high relative molecular mass, the structure of which essentially comprises the multiple repetition of units derived, actually or conceptually, from molecules of low relative molecular mass, as carried out by individual cells." [GOC:mah]	8430	155	98	18123	0.632258	0.0116251	FB3	['GO:0043170', 'GO:0044237']	['ADIRF', 'APOE', 'ATF3', 'BMP4', 'BST2', 'BTG1', 'BTG2', 'CCL2', 'CDKN1C', 'CHCHD10', 'CIRBP', 'CSRNP1', 'CXCR4', 'DAG1', 'DDIT4', 'EEF2', 'EGR1', 'EIF3L', 'EIF4A2', 'FBL', 'FGFR4', 'FOS', 'FOSB', 'GADD45B', 'GAPDH', 'GREM1', 'HES1', 'HEY1', 'HSP90AB1', 'JUN', 'JUNB', 'KLF10', 'KLHL41', 'MAFF', 'MIR24-2', 'MSC', 'MYC', 'MYF5', 'MYF6', 'NACA', 'NOTCH3', 'NPM1', 'NPPC', 'NUDT14', 'PAX7', 'PDK4', '…
351	GO:BP	GO:0016202	regulation of striated muscle tissue development	0.0390623	TRUE	"Any process that modulates the frequency, rate or extent of striated muscle development." [GOC:go_curators]	39	155	5	18123	0.0322581	0.128205	FB3	['GO:0014706', 'GO:0048634', 'GO:1901861']	['BMP4', 'MYF5', 'MYF6', 'NACA', 'SIRT2']
352	GO:BP	GO:0014904	myotube cell development	0.0390623	TRUE	"The process aimed at the progression of a myotube cell over time, from initial commitment of the cell to a specific fate, to the fully functional differentiated cell. Myotubes are multinucleated cells that are formed when proliferating myoblasts exit the cell cycle, differentiate and fuse." [GOC:mtg_muscle]	39	155	5	18123	0.0322581	0.128205	FB3	['GO:0014902', 'GO:0055001']	['KLHL41', 'MYF5', 'MYF6', 'NACA', 'STAC3']
353	GO:BP	GO:0008593	regulation of Notch signaling pathway	0.0391253	TRUE	"Any process that modulates the frequency, rate or extent of the Notch signaling pathway." [GOC:go_curators]	110	92	6	18123	0.0652174	0.0545455	FB2	['GO:0007219', 'GO:0009966']	['ENHO', 'HES1', 'HEY2', 'NOTCH3', 'POSTN', 'ROBO2']
354	GO:BP	GO:0009887	animal organ morphogenesis	0.039919	TRUE	"Morphogenesis of an animal organ. An organ is defined as a tissue or set of tissues that work together to perform a specific function or functions. Morphogenesis is the process in which anatomical structures are generated and organized. Organs are commonly observed as visibly distinct structures, but may also exist as loosely associated clusters of cells that work together to perform a specific …	1079	168	25	18123	0.14881	0.0231696	FB1	['GO:0009653', 'GO:0048513']	['ADM', 'CD34', 'CRIP1', 'CTHRC1', 'DCN', 'EFEMP1', 'ELN', 'FBN1', 'HSPG2', 'IGFBP5', 'LY6E', 'MGP', 'MMP2', 'NBL1', 'NTN4', 'OSR2', 'PAM', 'PDGFRB', 'RBPJ', 'SEMA3C', 'SFRP2', 'SFRP4', 'SLIT3', 'TGFBR3', 'TMEM176B']
355	GO:BP	GO:0001654	eye development	0.0400989	TRUE	"The process whose specific outcome is the progression of the eye over time, from its formation to the mature structure. The eye is the organ of sight." [GOC:jid, GOC:jl]	376	92	10	18123	0.108696	0.0265957	FB2	['GO:0007423', 'GO:0150063']	['ADAMTS18', 'COL4A1', 'COL5A2', 'HMGN1', 'INHBA', 'LAMC3', 'MFAP2', 'RBP4', 'VIM', 'WNT5A']
356	GO:BP	GO:0030335	positive regulation of cell migration	0.0424046	TRUE	"Any process that activates or increases the frequency, rate or extent of cell migration." [GOC:go_curators]	568	168	17	18123	0.10119	0.0299296	FB1	['GO:0016477', 'GO:0030334', 'GO:2000147']	['ACKR3', 'AKAP12', 'CXCL12', 'FBLN1', 'GPNMB', 'IGFBP5', 'ITGB1BP1', 'LGALS3', 'LRP1', 'PDGFD', 'PDGFRB', 'S100A11', 'SDCBP', 'SEMA3C', 'TMSB4X', 'TNFAIP6', 'XG']
357	GO:BP	GO:0006955	immune response	0.042592	TRUE	"Any immune system process that functions in the calibrated response of an organism to a potential internal or invasive threat." [GO_REF:0000022, GOC:add]	2544	168	44	18123	0.261905	0.0172956	FB1	['GO:0002376', 'GO:0050896']	['ACKR3', 'ACKR4', 'ADM', 'AXL', 'C1R', 'C1S', 'C3', 'CD34', 'CD55', 'CD81', 'CFD', 'CFH', 'CLU', 'CRIP1', 'CST3', 'CTSK', 'CXCL12', 'CYB5R3', 'ECM1', 'FTH1', 'FTL', 'GSN', 'IL6ST', 'ITM2A', 'LGALS3', 'LRP1', 'MFAP4', 'MGST1', 'NPC2', 'PPL', 'PRG4', 'RAMP2', 'RBPJ', 'S100A11', 'S100A13', 'SDCBP', 'SEMA3C', 'SERPING1', 'SLPI', 'SSC5D', 'TGFBR3', 'TIMP2', 'TNFAIP6', 'VAT1']
358	GO:BP	GO:0072009	nephron epithelium development	0.0433488	TRUE	"The process whose specific outcome is the progression of the nephron epithelium over time, from its formation to the mature structure. An epithelium is a tissue that covers the internal or external surfaces of an anatomical structure. The nephron epithelium is a tissue that covers the surface of a nephron." [GOC:mtg_kidney_jan10]	112	92	6	18123	0.0652174	0.0535714	FB2	['GO:0072006', 'GO:0072073']	['GPC3', 'HES1', 'MAGED1', 'MEF2C', 'PTCH1', 'WWTR1']
359	GO:BP	GO:0060914	heart formation	0.0437188	TRUE	"The developmental process pertaining to the initial formation of the heart from unspecified parts. This process begins with the specific processes that contribute to the appearance of the heart field and the arrival of cardiac neural crest to the heart region. The process ends when the structural rudiment is recognizable." [GOC:mtg_heart]	33	92	4	18123	0.0434783	0.121212	FB2	['GO:0003007', 'GO:0048645']	['HES1', 'MEF2C', 'ROBO2', 'WNT5A']
360	GO:BP	GO:0060828	regulation of canonical Wnt signaling pathway	0.0437786	TRUE	"Any process that modulates the rate, frequency, or extent of the Wnt signaling pathway through beta-catenin, the series of molecular signals initiated by binding of a Wnt protein to a frizzled family receptor on the surface of the target cell, followed by propagation of the signal via beta-catenin, and ending with a change in transcription of target genes." [GOC:dph, GOC:sdb_2009, GOC:tb]	302	92	9	18123	0.0978261	0.0298013	FB2	['GO:0030111', 'GO:0060070']	['COL1A1', 'DKK3', 'GPC3', 'MDK', 'SNAI2', 'SOX4', 'TNN', 'WNT5A', 'WWTR1']
361	GO:BP	GO:0150063	visual system development	0.0438988	TRUE	"The process whose specific outcome is the progression of the visual system over time, from its formation to the mature structure, including the eye, parts of the central nervous system (CNS) involved in processing of visual inputs, and connecting nerve pathways." [GOC:aruk, GOC:bc, GOC:krc, PMID:15004427, PMID:20647017, PMID:22632727]	380	92	10	18123	0.108696	0.0263158	FB2	['GO:0048880']	['ADAMTS18', 'COL4A1', 'COL5A2', 'HMGN1', 'INHBA', 'LAMC3', 'MFAP2', 'RBP4', 'VIM', 'WNT5A']
362	GO:BP	GO:0033993	response to lipid	0.043928	TRUE	"Any process that results in a change in state or activity of a cell or an organism (in terms of movement, secretion, enzyme production, gene expression, etc.) as a result of a lipid stimulus." [GOC:sl]	956	92	16	18123	0.173913	0.0167364	FB2	['GO:0010033']	['ALPL', 'CCND1', 'COL1A1', 'EDNRB', 'F2R', 'ID3', 'INHBA', 'MDK', 'MEF2C', 'POSTN', 'PTCH1', 'RBP4', 'SNAI2', 'SPARC', 'VIM', 'WNT5A']
363	GO:BP	GO:0061323	cell proliferation involved in heart morphogenesis	0.0448265	TRUE	"The multiplication or reproduction of cells, resulting in the expansion of a cell population that contributes to the shaping of the heart." [GOC:dph, GOC:mtg_heart]	20	155	4	18123	0.0258065	0.2	FB3	['GO:0003007', 'GO:0008283']	['BMP4', 'HES1', 'NACA', 'PITX2']
364	GO:BP	GO:0010951	negative regulation of endopeptidase activity	0.0459415	TRUE	"Any process that decreases the frequency, rate or extent of endopeptidase activity, the endohydrolysis of peptide bonds within proteins." [GOC:dph, GOC:tb]	252	168	11	18123	0.0654762	0.0436508	FB1	['GO:0010466', 'GO:0052548']	['C3', 'CST3', 'SERPINF1', 'SERPING1', 'SFRP2', 'SLPI', 'SPOCK1', 'TFPI', 'TIMP1', 'TIMP2', 'TIMP3']
365	GO:BP	GO:0032963	collagen metabolic process	0.0479322	TRUE	"The chemical reactions and pathways involving collagen, any of a group of fibrous proteins of very high tensile strength that form the main component of connective tissue in animals. Collagen is highly enriched in glycine (some regions are 33% glycine) and proline, occurring predominantly as 3-hydroxyproline (about 20%)." [GOC:mah, ISBN:0198506732]	114	92	6	18123	0.0652174	0.0526316	FB2	['GO:0008152']	['COL1A1', 'COL1A2', 'CREB3L1', 'F2R', 'SERPINH1', 'VIM']
366	GO:BP	GO:0051338	regulation of transferase activity	0.04874	TRUE	"Any process that modulates the frequency, rate or extent of transferase activity, the catalysis of the transfer of a group, e.g. a methyl group, glycosyl group, acyl group, phosphorus-containing, or other groups, from one compound (generally regarded as the donor) to another compound (generally regarded as the acceptor). Transferase is the systematic name for any enzyme of EC class 2." [EC:2.-.-…	1036	155	23	18123	0.148387	0.0222008	FB3	['GO:0050790']	['APOE', 'BMP4', 'CDKN1C', 'CXCR4', 'DAG1', 'EGR1', 'EIF4A2', 'FGFR4', 'GADD45B', 'GREM1', 'HSP90AB1', 'MIDN', 'MIR24-2', 'MYC', 'NPM1', 'RPL5', 'RPS2', 'RPS27A', 'RPS3', 'SERTAD1', 'SOCS3', 'TPD52L1', 'ZFP36']
367	GO:BP	GO:0000904	cell morphogenesis involved in differentiation	0.0492256	TRUE	"The change in form (cell shape and size) that occurs when relatively unspecialized cells, e.g. embryonic or regenerative cells, acquire specialized structural and/or functional features that characterize the cells, tissues, or organs of the mature organism or some other relatively stable phase of the organism's life history." [GOC:go_curators]	754	92	14	18123	0.152174	0.0185676	FB2	['GO:0000902', 'GO:0048468']	['CDH11', 'HES1', 'LAMC3', 'MDK', 'MEF2C', 'NOTCH3', 'PALLD', 'POSTN', 'PTCH1', 'ROBO2', 'STMN1', 'TNMD', 'TNN', 'WNT5A']
368	GO:BP	GO:1901861	regulation of muscle tissue development	0.0501476	FALSE	"Any process that modulates the frequency, rate or extent of muscle tissue development." [GOC:TermGenie, GOC:yaf, PMID:23150719]	41	155	5	18123	0.0322581	0.121951	FB3	['GO:0050793', 'GO:0060537']	['BMP4', 'MYF5', 'MYF6', 'NACA', 'SIRT2']
369	GO:BP	GO:0048880	sensory system development	0.0501779	FALSE	"The process whose specific outcome is the progression of a sensory system over time from its formation to the mature structure." [GOC:dgh]	386	92	10	18123	0.108696	0.0259067	FB2	['GO:0048731']	['ADAMTS18', 'COL4A1', 'COL5A2', 'HMGN1', 'INHBA', 'LAMC3', 'MFAP2', 'RBP4', 'VIM', 'WNT5A']
370	GO:BP	GO:0046686	response to cadmium ion	0.0502129	FALSE	"Any process that results in a change in state or activity of a cell or an organism (in terms of movement, secretion, enzyme production, gene expression, etc.) as a result of a cadmium (Cd) ion stimulus." [GOC:ai]	68	155	6	18123	0.0387097	0.0882353	FB3	['GO:0010038']	['FOS', 'JUN', 'MT1E', 'MT1M', 'MT1X', 'MT2A']
371	GO:BP	GO:0071230	cellular response to amino acid stimulus	0.0505289	FALSE	"Any process that results in a change in state or activity of a cell (in terms of movement, secretion, enzyme production, gene expression, etc.) as a result of an amino acid stimulus. An amino acid is a carboxylic acids containing one or more amino groups." [GOC:mah]	69	92	5	18123	0.0543478	0.0724638	FB2	['GO:0043200', 'GO:0071229', 'GO:0071417', 'GO:1901701']	['COL1A1', 'COL1A2', 'COL4A1', 'COL5A2', 'COL6A1']
372	GO:BP	GO:0061448	connective tissue development	0.0512308	FALSE	"The progression of a connective tissue over time, from its formation to the mature structure." [GOC:BHF]	255	168	11	18123	0.0654762	0.0431373	FB1	['GO:0009888']	['CD34', 'CRIP1', 'CTSK', 'ECM1', 'EFEMP1', 'MGP', 'OSR2', 'PDGFD', 'PDGFRB', 'SFRP2', 'TIMP1']
373	GO:BP	GO:0070493	thrombin-activated receptor signaling pathway	0.0518154	FALSE	"The series of molecular signals generated as a consequence of a thrombin-activated receptor binding to one of its physiological ligands." [GOC:mah, PMID:1672265]	12	92	3	18123	0.0326087	0.25	FB2	['GO:0007186']	['F2R', 'F2RL2', 'STMN1']
374	GO:BP	GO:0038063	collagen-activated tyrosine kinase receptor signaling pathway	0.0518154	FALSE	"A series of molecular signals initiated by the binding of collagen to a receptor on the surface of the target cell where the receptor possesses tyrosine kinase activity. The pathway ends with regulation of a downstream cellular process, e.g. transcription." [GOC:bf, GOC:uh, PMID:15888913, PMID:16626936]	12	92	3	18123	0.0326087	0.25	FB2	['GO:0007169', 'GO:0038065']	['COL1A1', 'COL4A1', 'COL4A2']
375	GO:BP	GO:0045595	regulation of cell differentiation	0.0539488	FALSE	"Any process that modulates the frequency, rate or extent of cell differentiation, the process in which relatively unspecialized cells acquire specialized structural and functional features." [GOC:go_curators]	1688	92	22	18123	0.23913	0.0130332	FB2	['GO:0030154', 'GO:0050793', 'GO:0050794']	['CCND1', 'COL1A1', 'COL5A2', 'EDNRB', 'HES1', 'HEY2', 'ID3', 'INHBA', 'MDK', 'MEF2C', 'NAP1L1', 'POSTN', 'PTCH1', 'ROBO2', 'SERPINE2', 'SNAI2', 'SOX4', 'TMEM119', 'TNN', 'TRPS1', 'WNT5A', 'WWTR1']
376	GO:BP	GO:0060411	cardiac septum morphogenesis	0.054199	FALSE	"The process in which the anatomical structure of a cardiac septum is generated and organized. A cardiac septum is a partition that separates parts of the heart." [GOC:dph, GOC:mtg_heart]	70	92	5	18123	0.0543478	0.0714286	FB2	['GO:0003206', 'GO:0003279', 'GO:0009653']	['HES1', 'HEY2', 'ROBO2', 'SOX4', 'WNT5A']
377	GO:BP	GO:0045595	regulation of cell differentiation	0.055711	FALSE	"Any process that modulates the frequency, rate or extent of cell differentiation, the process in which relatively unspecialized cells acquire specialized structural and functional features." [GOC:go_curators]	1688	168	33	18123	0.196429	0.0195498	FB1	['GO:0030154', 'GO:0050793', 'GO:0050794']	['ABI3BP', 'ADM', 'AXL', 'CD34', 'CTHRC1', 'CTSK', 'CXCL12', 'DBN1', 'EFEMP1', 'FBLN1', 'FBN1', 'IGFBP5', 'IL6ST', 'ITGB1BP1', 'JUND', 'LGALS3', 'LRP1', 'LTBP4', 'MEDAG', 'NBL1', 'PI16', 'RAMP2', 'RBPJ', 'SDCBP', 'SEMA3C', 'SERPINF1', 'SFRP2', 'SFRP4', 'TIMP2', 'TMEM176A', 'TMEM176B', 'VASN', 'YWHAH']
378	GO:BP	GO:0006417	regulation of translation	0.0572716	FALSE	"Any process that modulates the frequency, rate or extent of the chemical reactions and pathways resulting in the formation of proteins by the translation of mRNA or circRNA." [GOC:isa_complete]	504	155	15	18123	0.0967742	0.0297619	FB3	['GO:0006412', 'GO:0010608', 'GO:0032268', 'GO:0034248', 'GO:2000112']	['ATF3', 'BTG2', 'CIRBP', 'EEF2', 'EIF4A2', 'GAPDH', 'MYC', 'NPM1', 'RPL10', 'RPL26', 'RPL5', 'RPS3', 'RPS4X', 'RPS9', 'ZFP36']
379	GO:BP	GO:0045727	positive regulation of translation	0.0578536	FALSE	"Any process that activates or increases the frequency, rate or extent of the chemical reactions and pathways resulting in the formation of proteins by the translation of mRNA or circRNA." [GOC:dph, GOC:go_curators, GOC:tb]	141	155	8	18123	0.0516129	0.0567376	FB3	['GO:0006412', 'GO:0006417', 'GO:0010557', 'GO:0010628', 'GO:0031328', 'GO:0032270', 'GO:0034250']	['CIRBP', 'EEF2', 'MYC', 'NPM1', 'RPL26', 'RPL5', 'RPS4X', 'RPS9']
380	GO:BP	GO:0010035	response to inorganic substance	0.0589506	FALSE	"Any process that results in a change in state or activity of a cell or an organism (in terms of movement, secretion, enzyme production, gene expression, etc.) as a result of an inorganic substance stimulus." [GOC:sm]	583	168	17	18123	0.10119	0.0291595	FB1	['GO:0042221']	['AKR1C3', 'AXL', 'CRIP1', 'CYBRD1', 'FBLN5', 'FIBIN', 'GSN', 'JUND', 'NDRG1', 'PAM', 'PDGFD', 'PDGFRB', 'PTGES', 'S100A13', 'SERPINF1', 'SOD3', 'TXNIP']
381	GO:BP	GO:0070848	response to growth factor	0.0589807	FALSE	"Any process that results in a change in state or activity of a cell or an organism (in terms of movement, secretion, enzyme production, gene expression, etc.) as a result of a growth factor stimulus." [GOC:BHF, GOC:mah]	769	168	20	18123	0.119048	0.0260078	FB1	['GO:0010033']	['CHRDL1', 'CLEC3B', 'DCN', 'FBN1', 'FSTL1', 'GAS1', 'ITGB1BP1', 'LTBP2', 'LTBP4', 'NBL1', 'PDGFD', 'PDGFRB', 'POLR2L', 'RAMP2', 'RBPJ', 'SDCBP', 'SFRP2', 'SFRP4', 'TGFBR3', 'VASN']
382	GO:BP	GO:0051094	positive regulation of developmental process	0.0598349	FALSE	"Any process that activates or increases the rate or extent of development, the biological process whose specific outcome is the progression of an organism over time from an initial condition (e.g. a zygote, or a young adult) to a later condition (e.g. a multicellular animal or an aged adult)." [GOC:ai]	1354	155	27	18123	0.174194	0.0199409	FB3	['GO:0032502', 'GO:0048518', 'GO:0050793']	['ADIRF', 'ANGPTL4', 'APOE', 'BMP4', 'BTG1', 'CDH15', 'CHODL', 'CLDN5', 'CXCR4', 'DAG1', 'FOS', 'FRZB', 'GPM6B', 'GREM1', 'HES1', 'HSP90AB1', 'JUN', 'JUNB', 'KLF10', 'MYC', 'MYF5', 'MYF6', 'NACA', 'NPPC', 'SIRT2', 'SOCS3', 'ZFP36']
383	GO:BP	GO:0045944	positive regulation of transcription by RNA polymerase II	0.0601833	FALSE	"Any process that activates or increases the frequency, rate or extent of transcription from an RNA polymerase II promoter." [GOC:go_curators, GOC:txnOH]	1200	155	25	18123	0.16129	0.0208333	FB3	['GO:0006357', 'GO:0006366', 'GO:0045893']	['ADIRF', 'ATF3', 'BMP4', 'CSRNP1', 'EGR1', 'FOS', 'FOSB', 'GREM1', 'HES1', 'HEY1', 'JUN', 'JUNB', 'KLF10', 'MAFF', 'MYC', 'MYF5', 'MYF6', 'NACA', 'NOTCH3', 'NPM1', 'PITX2', 'RPS27A', 'RXRG', 'SERTAD1', 'SIRT2']
384	GO:BP	GO:0008284	positive regulation of cell population proliferation	0.0631661	FALSE	"Any process that activates or increases the rate or extent of cell proliferation." [GOC:go_curators]	985	92	16	18123	0.173913	0.0162437	FB2	['GO:0008283', 'GO:0042127', 'GO:0048522']	['CCND1', 'CLEC11A', 'EDNRB', 'F2R', 'HES1', 'HEY2', 'IL11RA', 'MARCKSL1', 'MDK', 'MEF2C', 'NAP1L1', 'NPM1', 'SOX4', 'TMEM119', 'WNT5A', 'WWTR1']
385	GO:BP	GO:0045765	regulation of angiogenesis	0.0634677	FALSE	"Any process that modulates the frequency, rate or extent of angiogenesis." [GOC:go_curators]	361	168	13	18123	0.077381	0.0360111	FB1	['GO:0001525', 'GO:0022603', 'GO:1901342']	['ADM', 'C3', 'CD34', 'DCN', 'ECM1', 'GPNMB', 'HSPG2', 'PTGIS', 'RAMP2', 'RNH1', 'SERPINF1', 'SFRP2', 'THBS2']
386	GO:BP	GO:0048634	regulation of muscle organ development	0.0635337	FALSE	"Any process that modulates the frequency, rate or extent of muscle development." [GOC:go_curators]	43	155	5	18123	0.0322581	0.116279	FB3	['GO:0007517', 'GO:0050793']	['BMP4', 'MYF5', 'MYF6', 'NACA', 'SIRT2']
387	GO:BP	GO:0070848	response to growth factor	0.0639543	FALSE	"Any process that results in a change in state or activity of a cell or an organism (in terms of movement, secretion, enzyme production, gene expression, etc.) as a result of a growth factor stimulus." [GOC:BHF, GOC:mah]	769	155	19	18123	0.122581	0.0247074	FB3	['GO:0010033']	['BMP4', 'CCL2', 'CDKN1C', 'CLDN5', 'DDIT4', 'EEF2', 'EGR1', 'FGFR4', 'FOS', 'GREM1', 'HES1', 'HSP90AB1', 'JUN', 'MYC', 'PEG10', 'RPS27A', 'SIRT2', 'TGIF1', 'ZFP36']
388	GO:BP	GO:0060284	regulation of cell development	0.0641558	FALSE	"Any process that modulates the rate, frequency or extent of the progression of the cell over time, from its formation to the mature structure. Cell development does not include the steps involved in committing a cell to a specific fate." [GOC:dph, GOC:tb]	509	155	15	18123	0.0967742	0.0294695	FB3	['GO:0045595', 'GO:0048468']	['BMP4', 'CHODL', 'CLDN5', 'CXCR4', 'DAG1', 'FRZB', 'HES1', 'HEY1', 'MYC', 'MYF5', 'MYF6', 'NACA', 'NPPC', 'RPS19', 'SIRT2']
389	GO:BP	GO:0007167	enzyme linked receptor protein signaling pathway	0.0705803	FALSE	"Any series of molecular signals initiated by the binding of an extracellular ligand to a receptor on the surface of the target cell, where the receptor possesses catalytic activity or is closely associated with an enzyme such as a protein kinase, and ending with regulation of a downstream cellular process, e.g. transcription." [GOC:mah, GOC:signaling, ISBN:0815316194]	1107	92	17	18123	0.184783	0.0153568	FB2	['GO:0007166']	['ASPN', 'COL1A1', 'COL1A2', 'COL3A1', 'COL4A1', 'COL4A2', 'CREB3L1', 'DKK3', 'GPC3', 'HES1', 'HNRNPA1', 'INHBA', 'STMN1', 'TNMD', 'VIM', 'WNT5A', 'WWTR1']
390	GO:BP	GO:2000147	positive regulation of cell motility	0.0714332	FALSE	"Any process that activates or increases the frequency, rate or extent of cell motility." [GOC:mah]	592	168	17	18123	0.10119	0.0287162	FB1	['GO:0040017', 'GO:0048870', 'GO:0051272', 'GO:2000145']	['ACKR3', 'AKAP12', 'CXCL12', 'FBLN1', 'GPNMB', 'IGFBP5', 'ITGB1BP1', 'LGALS3', 'LRP1', 'PDGFD', 'PDGFRB', 'S100A11', 'SDCBP', 'SEMA3C', 'TMSB4X', 'TNFAIP6', 'XG']
391	GO:BP	GO:0045935	positive regulation of nucleobase-containing compound metabolic process	0.0724574	FALSE	"Any cellular process that activates or increases the frequency, rate or extent of the chemical reactions and pathways involving nucleobases, nucleosides, nucleotides and nucleic acids." [GOC:go_curators]	1943	155	34	18123	0.219355	0.0174987	FB3	['GO:0006139', 'GO:0019219', 'GO:0031325', 'GO:0051173']	['ADIRF', 'APOE', 'ATF3', 'BMP4', 'BTG2', 'CDKN1C', 'CHCHD10', 'CIRBP', 'CSRNP1', 'EGR1', 'FGFR4', 'FOS', 'FOSB', 'GREM1', 'HES1', 'HEY1', 'HSP90AB1', 'JUN', 'JUNB', 'KLF10', 'MAFF', 'MYC', 'MYF5', 'MYF6', 'NACA', 'NOTCH3', 'NPM1', 'PITX2', 'RPS27A', 'RPS3', 'RXRG', 'SERTAD1', 'SIRT2', 'ZFP36']
392	GO:BP	GO:0048589	developmental growth	0.072795	FALSE	"The increase in size or mass of an entire organism, a part of an organism or a cell, where the increase in size or mass has the specific outcome of the progression of the organism over time from one condition to another." [GOC:go_curators]	654	168	18	18123	0.107143	0.0275229	FB1	['GO:0032502', 'GO:0040007']	['ADM', 'APOD', 'CD81', 'CXCL12', 'DBN1', 'ECM1', 'GAS1', 'GSN', 'LEPR', 'LRP1', 'LY6E', 'PDGFRB', 'PI16', 'RBPJ', 'SEMA3C', 'SFRP2', 'SLIT3', 'TGFBR3']
393	GO:BP	GO:0009628	response to abiotic stimulus	0.0752269	FALSE	"Any process that results in a change in state or activity of a cell or an organism (in terms of movement, secretion, enzyme production, gene expression, etc.) as a result of an abiotic (not derived from living organisms) stimulus." [GOC:hb]	1264	168	27	18123	0.160714	0.0213608	FB1	['GO:0050896']	['ADM', 'AKAP12', 'CD34', 'CRIP1', 'CXCL12', 'DCN', 'GSN', 'IGFBP7', 'JUND', 'MFAP4', 'MMP2', 'NDRG1', 'PAM', 'PDGFRB', 'PPL', 'PTGIS', 'RAMP2', 'RBPJ', 'S100A13', 'SCARA5', 'SERPINF1', 'SFRP2', 'SOD3', 'TGFBR3', 'TIMP1', 'TXNIP', 'VASN']
394	GO:BP	GO:1901342	regulation of vasculature development	0.0752296	FALSE	"Any process that modulates the frequency, rate or extent of vasculature development." [GOC:TermGenie]	367	168	13	18123	0.077381	0.0354223	FB1	['GO:0001944', 'GO:2000026']	['ADM', 'C3', 'CD34', 'DCN', 'ECM1', 'GPNMB', 'HSPG2', 'PTGIS', 'RAMP2', 'RNH1', 'SERPINF1', 'SFRP2', 'THBS2']
395	GO:BP	GO:0040012	regulation of locomotion	0.0755526	FALSE	"Any process that modulates the frequency, rate or extent of locomotion of a cell or organism." [GOC:ems]	1113	92	17	18123	0.184783	0.015274	FB2	['GO:0040011', 'GO:0050789']	['COL1A1', 'COL3A1', 'DPEP1', 'ENPP2', 'F2R', 'KRT16', 'LMO4', 'MDK', 'MEF2C', 'PLK2', 'POSTN', 'ROBO2', 'SERPINE2', 'SNAI2', 'SPARC', 'TNN', 'WNT5A']
396	GO:BP	GO:0003151	outflow tract morphogenesis	0.0757631	FALSE	"The process in which the anatomical structures of the outflow tract are generated and organized. The outflow tract is the portion of the heart through which blood flows into the arteries." [GOC:mtg_heart, UBERON:0004145]	75	92	5	18123	0.0543478	0.0666667	FB2	['GO:0003007', 'GO:0009653']	['HES1', 'HEY2', 'MEF2C', 'ROBO2', 'WNT5A']
397	GO:BP	GO:0001704	formation of primary germ layer	0.0770656	FALSE	"The formation of the ectoderm, mesoderm and endoderm during gastrulation." [GOC:go_curators]	124	92	6	18123	0.0652174	0.0483871	FB2	['GO:0007369', 'GO:0048646']	['COL11A1', 'COL4A2', 'COL5A2', 'COL6A1', 'INHBA', 'WNT5A']
398	GO:BP	GO:0031589	cell-substrate adhesion	0.0773645	FALSE	"The attachment of a cell to the underlying substrate via adhesion molecules." [GOC:mah, GOC:pf]	368	168	13	18123	0.077381	0.0353261	FB1	['GO:0007155']	['ABI3BP', 'APOD', 'AXL', 'CCDC80', 'CD34', 'FBLN1', 'FBLN2', 'FBLN5', 'ITGB1BP1', 'LRP1', 'NTN4', 'SPOCK1', 'TNXB']
399	GO:BP	GO:0090092	regulation of transmembrane receptor protein serine/threonine kinase signaling pathway	0.0780043	FALSE	"Any process that modulates the rate, frequency, or extent of the series of molecular signals generated as a consequence of a transmembrane receptor serine/threonine kinase binding to its physiological ligand." [GOC:dph, GOC:tb]	267	168	11	18123	0.0654762	0.0411985	FB1	['GO:0007178', 'GO:0009966']	['CHRDL1', 'FBN1', 'FSTL1', 'LTBP4', 'NBL1', 'RBPJ', 'SDCBP', 'SFRP2', 'SFRP4', 'TGFBR3', 'VASN']
400	GO:BP	GO:0045321	leukocyte activation	0.0794837	FALSE	"A change in morphology and behavior of a leukocyte resulting from exposure to a specific antigen, mitogen, cytokine, cellular ligand, or soluble factor." [GOC:add]	1341	168	28	18123	0.166667	0.0208799	FB1	['GO:0001775', 'GO:0002376']	['AXL', 'C3', 'CD55', 'CD81', 'CFD', 'CLU', 'CST3', 'CYB5R3', 'FTH1', 'FTL', 'GPNMB', 'GSN', 'IL6ST', 'ITM2A', 'JUND', 'LEPR', 'LGALS3', 'MGST1', 'NDRG1', 'NPC2', 'RBPJ', 'S100A11', 'S100A13', 'SDCBP', 'SLPI', 'TIMP2', 'TNFAIP6', 'VAT1']
401	GO:BP	GO:0071294	cellular response to zinc ion	0.0803063	FALSE	"Any process that results in a change in state or activity of a cell (in terms of movement, secretion, enzyme production, gene expression, etc.) as a result of a zinc ion stimulus." [GOC:mah]	23	155	4	18123	0.0258065	0.173913	FB3	['GO:0010043', 'GO:0071248']	['MT1E', 'MT1M', 'MT1X', 'MT2A']
402	GO:BP	GO:0061138	morphogenesis of a branching epithelium	0.0807799	FALSE	"The process in which the anatomical structures of a branched epithelium are generated and organized." [GOC:dph]	184	92	7	18123	0.076087	0.0380435	FB2	['GO:0001763', 'GO:0002009']	['COL4A1', 'EDNRA', 'GPC3', 'MAGED1', 'MDK', 'PTCH1', 'WNT5A']
403	GO:BP	GO:0038098	sequestering of BMP from receptor via BMP binding	0.0814389	FALSE	"Binding to a bone morphogenetic protein (BMP) in the extracellular region, and inhibiting BMP signaling by preventing BMP from binding to its cell surface receptor." [GOC:bf, GOC:signaling, PMID:19855014]	8	168	3	18123	0.0178571	0.375	FB1	['GO:0030514', 'GO:0035581']	['CHRDL1', 'FSTL1', 'NBL1']
404	GO:BP	GO:0051045	negative regulation of membrane protein ectodomain proteolysis	0.0814389	FALSE	"Any process that stops, prevents, or reduces the frequency, rate or extent of membrane protein ectodomain proteolysis." [GOC:ai]	8	168	3	18123	0.0178571	0.375	FB1	['GO:0006509', 'GO:0031330', 'GO:0042177', 'GO:0045861', 'GO:0051043']	['TIMP1', 'TIMP2', 'TIMP3']
405	GO:BP	GO:0030334	regulation of cell migration	0.0834047	FALSE	"Any process that modulates the frequency, rate or extent of cell migration." [GOC:go_curators]	1008	92	16	18123	0.173913	0.015873	FB2	['GO:0016477', 'GO:2000145']	['COL1A1', 'COL3A1', 'DPEP1', 'ENPP2', 'F2R', 'KRT16', 'LMO4', 'MDK', 'MEF2C', 'PLK2', 'POSTN', 'SERPINE2', 'SNAI2', 'SPARC', 'TNN', 'WNT5A']
406	GO:BP	GO:0048513	animal organ development	0.084691	FALSE	"Development of a tissue or tissues that work together to perform a specific function or functions. Development pertains to the process whose specific outcome is the progression of a structure over time, from its formation to the mature structure. Organs are commonly observed as visibly distinct structures, but may also exist as loosely associated clusters of cells that work together to perform a…	3701	155	53	18123	0.341935	0.0143205	FB3	['GO:0048731', 'GO:0048856']	['ATF3', 'BMP4', 'BTG2', 'CCL2', 'CHODL', 'CHRNA1', 'CLDN5', 'COL18A1', 'CRIP2', 'CSRNP1', 'CXCR4', 'DAG1', 'DDIT4', 'EEF2', 'EGR1', 'FOS', 'FRZB', 'GPM6B', 'GREM1', 'HES1', 'HEY1', 'HSP90AB1', 'IMPDH2', 'JUN', 'JUNB', 'KLF10', 'KLHL41', 'MAFF', 'MIR24-2', 'MSC', 'MYC', 'MYF5', 'MYF6', 'NACA', 'NDRG2', 'NPPC', 'PAX7', 'PDLIM3', 'PDLIM4', 'PITX2', 'RPL10', 'RPL13', 'RPL24', 'RPS19', 'RPS6', 'SGCA'…
407	GO:BP	GO:0007369	gastrulation	0.0895252	FALSE	"A complex and coordinated series of cellular movements that occurs at the end of cleavage during embryonic development of most animals. The details of gastrulation vary from species to species, but usually result in the formation of the three primary germ layers, ectoderm, mesoderm and endoderm." [GOC:curators, ISBN:9780878933846]	187	92	7	18123	0.076087	0.0374332	FB2	['GO:0048598']	['COL11A1', 'COL4A2', 'COL5A2', 'COL6A1', 'GPC3', 'INHBA', 'WNT5A']
408	GO:BP	GO:0007166	cell surface receptor signaling pathway	0.0896618	FALSE	"A series of molecular signals initiated by activation of a receptor on the surface of a cell. The pathway begins with binding of an extracellular ligand to a cell surface receptor, or for receptors that signal in the absence of a ligand, by ligand-withdrawal or the activity of a constitutively active receptor. The pathway ends with regulation of a downstream cellular process, e.g. transcription.…	3226	168	51	18123	0.303571	0.0158091	FB1	['GO:0007165']	['ACKR3', 'ACKR4', 'ANGPTL1', 'APOD', 'AXL', 'C3', 'CD55', 'CD81', 'CFD', 'CHRDL1', 'CTHRC1', 'CXCL12', 'DCN', 'ECM1', 'EFEMP1', 'ENTPD1', 'FBN1', 'FSTL1', 'GAS1', 'GFRA1', 'IGFBP5', 'IGFBP6', 'IL6ST', 'ITGB1BP1', 'LEPR', 'LEPROT', 'LGALS3', 'LRP1', 'LTBP2', 'LTBP4', 'LY6E', 'MMP2', 'NBL1', 'NT5E', 'PDGFD', 'PDGFRB', 'PDGFRL', 'POLR2L', 'RBPJ', 'SDC2', 'SDCBP', 'SEMA3C', 'SFRP2', 'SFRP4', 'SLIT3'…
409	GO:BP	GO:0071229	cellular response to acid chemical	0.0915684	FALSE	"Any process that results in a change in state or activity of a cell (in terms of movement, secretion, enzyme production, gene expression, etc.) as a result of a stimulus by the chemical structure of the anion portion of the dissociated acid (rather than the acid acting as a proton donor). The acid chemical may be in gaseous, liquid or solid form." [GOC:go_curators, GOC:mah, Wikipedia:Acid]	78	92	5	18123	0.0543478	0.0641026	FB2	['GO:0001101', 'GO:0070887']	['COL1A1', 'COL1A2', 'COL4A1', 'COL5A2', 'COL6A1']
410	GO:BP	GO:0051272	positive regulation of cellular component movement	0.0936045	FALSE	"Any process that activates or increases the frequency, rate or extent of the movement of a cellular component." [GOC:ai, GOC:dph, GOC:jl]	605	168	17	18123	0.10119	0.0280992	FB1	['GO:0006928', 'GO:0048522', 'GO:0051270']	['ACKR3', 'AKAP12', 'CXCL12', 'FBLN1', 'GPNMB', 'IGFBP5', 'ITGB1BP1', 'LGALS3', 'LRP1', 'PDGFD', 'PDGFRB', 'S100A11', 'SDCBP', 'SEMA3C', 'TMSB4X', 'TNFAIP6', 'XG']
411	GO:BP	GO:0090090	negative regulation of canonical Wnt signaling pathway	0.0957758	FALSE	"Any process that decreases the rate, frequency, or extent of the Wnt signaling pathway through beta-catenin, the series of molecular signals initiated by binding of a Wnt protein to a frizzled family receptor on the surface of the target cell, followed by propagation of the signal via beta-catenin, and ending with a change in transcription of target genes." [GOC:dph, GOC:tb]	189	92	7	18123	0.076087	0.037037	FB2	['GO:0030178', 'GO:0060070', 'GO:0060828']	['DKK3', 'GPC3', 'MDK', 'SNAI2', 'TNN', 'WNT5A', 'WWTR1']
412	GO:BP	GO:0031175	neuron projection development	0.0972228	FALSE	"The process whose specific outcome is the progression of a neuron projection over time, from its formation to the mature structure. A neuron projection is any process extending from a neural cell, such as axons or dendrites (collectively called neurites)." [GOC:mah]	1021	92	16	18123	0.173913	0.0156709	FB2	['GO:0048666', 'GO:0120036']	['CDH11', 'HES1', 'MDK', 'MEF2C', 'NOTCH3', 'PALLD', 'PLK2', 'POSTN', 'PTCH1', 'RAB13', 'ROBO2', 'STMN1', 'STMN2', 'TNN', 'VIM', 'WNT5A']
413	GO:BP	GO:0040017	positive regulation of locomotion	0.0975085	FALSE	"Any process that activates or increases the frequency, rate or extent of locomotion of a cell or organism." [GOC:go_curators]	607	168	17	18123	0.10119	0.0280066	FB1	['GO:0040011', 'GO:0040012', 'GO:0048518']	['ACKR3', 'AKAP12', 'CXCL12', 'FBLN1', 'GPNMB', 'IGFBP5', 'ITGB1BP1', 'LGALS3', 'LRP1', 'PDGFD', 'PDGFRB', 'S100A11', 'SDCBP', 'SEMA3C', 'TMSB4X', 'TNFAIP6', 'XG']
414	GO:BP	GO:0010038	response to metal ion	0.0990852	FALSE	"Any process that results in a change in state or activity of a cell or an organism (in terms of movement, secretion, enzyme production, gene expression, etc.) as a result of a metal ion stimulus." [GOC:sm]	377	168	13	18123	0.077381	0.0344828	FB1	['GO:0010035']	['AKR1C3', 'CRIP1', 'CYBRD1', 'FIBIN', 'GSN', 'JUND', 'NDRG1', 'PAM', 'PTGES', 'S100A13', 'SERPINF1', 'SOD3', 'TXNIP']
415	GO:BP	GO:0061309	cardiac neural crest cell development involved in outflow tract morphogenesis	0.099267	FALSE	"The process aimed at the progression of a cardiac neural crest cell over time, from initial commitment of the cell to its specific fate, to the fully functional differentiated cell that contributes to the shaping of the outflow tract." [GOC:dph, GOC:mtg_heart]	9	155	3	18123	0.0193548	0.333333	FB3	['GO:0003151', 'GO:0061308']	['BMP4', 'HES1', 'PITX2']
416	GO:BP	GO:0042476	odontogenesis	0.100442	FALSE	"The process whose specific outcome is the progression of a tooth or teeth over time, from formation to the mature structure(s). A tooth is any hard bony, calcareous, or chitinous organ found in the mouth or pharynx of an animal and used in procuring or masticating food." [GOC:jl, GOC:mah]	130	92	6	18123	0.0652174	0.0461538	FB2	['GO:0009887']	['ALPL', 'ASPN', 'COL1A1', 'COL1A2', 'ID3', 'INHBA']
417	GO:BP	GO:0007155	cell adhesion	0.100536	FALSE	"The attachment of a cell, either to another cell or to an underlying substrate such as the extracellular matrix, via cell adhesion molecules." [GOC:hb, GOC:pf]	1502	92	20	18123	0.217391	0.0133156	FB2	['GO:0009987', 'GO:0022610']	['ADAMTS18', 'CDH11', 'COL1A1', 'COL3A1', 'COL6A1', 'COL6A3', 'HAPLN1', 'HES1', 'LAMC3', 'MDK', 'PALLD', 'POSTN', 'ROBO2', 'SERPINE2', 'SNAI2', 'SOX4', 'SPARCL1', 'TNN', 'VCAN', 'WNT5A']
418	GO:BP	GO:0048608	reproductive structure development	0.101982	FALSE	"The reproductive developmental process whose specific outcome is the progression of structures that will be used in the process of creating new individuals from one or more parents, from their formation to the mature structures." [GOC:dph, GOC:isa_complete, GOC:jid]	433	168	14	18123	0.0833333	0.0323326	FB1	['GO:0003006', 'GO:0048856', 'GO:0061458']	['ADM', 'AKR1C3', 'AXL', 'C3', 'CRIP1', 'DCN', 'MGST1', 'NUPR1', 'PDGFRB', 'RBPJ', 'SERPINF1', 'SFRP2', 'SLIT3', 'TPPP3']
419	GO:BP	GO:0007492	endoderm development	0.103444	FALSE	"The process whose specific outcome is the progression of the endoderm over time, from its formation to the mature structure. The endoderm is the innermost germ layer that develops into the gastrointestinal tract, the lungs and associated tissues." [GOC:dph, GOC:tb]	80	92	5	18123	0.0543478	0.0625	FB2	['GO:0009888']	['COL11A1', 'COL4A2', 'COL5A2', 'COL6A1', 'INHBA']
420	GO:BP	GO:0038065	collagen-activated signaling pathway	0.105986	FALSE	"A series of molecular signals initiated by collagen binding to a cell surface receptor, and ending with regulation of a downstream cellular process, e.g. transcription." [GOC:bf, GOC:uh, PMID:21568710]	15	92	3	18123	0.0326087	0.2	FB2	['GO:0007166']	['COL1A1', 'COL4A1', 'COL4A2']
421	GO:BP	GO:0022610	biological adhesion	0.107323	FALSE	"The attachment of a cell or organism to a substrate, another cell, or other organism. Biological adhesion includes intracellular attachment between membrane regions." [GOC:isa_complete]	1509	92	20	18123	0.217391	0.0132538	FB2	['GO:0008150']	['ADAMTS18', 'CDH11', 'COL1A1', 'COL3A1', 'COL6A1', 'COL6A3', 'HAPLN1', 'HES1', 'LAMC3', 'MDK', 'PALLD', 'POSTN', 'ROBO2', 'SERPINE2', 'SNAI2', 'SOX4', 'SPARCL1', 'TNN', 'VCAN', 'WNT5A']
422	GO:BP	GO:0061458	reproductive system development	0.109833	FALSE	"The progression of the reproductive system over time from its formation to the mature structure. The reproductive system consists of the organs that function in reproduction." [GOC:dph]	436	168	14	18123	0.0833333	0.0321101	FB1	['GO:0048731']	['ADM', 'AKR1C3', 'AXL', 'C3', 'CRIP1', 'DCN', 'MGST1', 'NUPR1', 'PDGFRB', 'RBPJ', 'SERPINF1', 'SFRP2', 'SLIT3', 'TPPP3']
423	GO:BP	GO:0051270	regulation of cellular component movement	0.11249	FALSE	"Any process that modulates the frequency, rate or extent of the movement of a cellular component." [GOC:ai, GOC:dph, GOC:jl]	1149	92	17	18123	0.184783	0.0147955	FB2	['GO:0006928', 'GO:0032879', 'GO:0050794']	['COL1A1', 'COL3A1', 'DPEP1', 'ENPP2', 'F2R', 'KRT16', 'LMO4', 'MDK', 'MEF2C', 'PLK2', 'POSTN', 'SERPINE2', 'SNAI2', 'SPARC', 'STMN1', 'TNN', 'WNT5A']
424	GO:BP	GO:0030510	regulation of BMP signaling pathway	0.11262	FALSE	"Any process that modulates the frequency, rate or extent of the activity of any BMP receptor signaling pathway." [GOC:mah]	106	168	7	18123	0.0416667	0.0660377	FB1	['GO:0030509', 'GO:0090092', 'GO:0090287']	['CHRDL1', 'FBN1', 'FSTL1', 'NBL1', 'RBPJ', 'SFRP2', 'SFRP4']
425	GO:BP	GO:0043588	skin development	0.115245	FALSE	"The process whose specific outcome is the progression of the skin over time, from its formation to the mature structure. The skin is the external membranous integument of an animal. In vertebrates the skin generally consists of two layers, an outer nonsensitive and nonvascular epidermis (cuticle or skarfskin) composed of cells which are constantly growing and multiplying in the deeper, and being…	426	92	10	18123	0.108696	0.0234742	FB2	['GO:0048513']	['COL1A1', 'COL1A2', 'COL3A1', 'COL5A2', 'INHBA', 'KRT16', 'KRT17', 'PALLD', 'STMN1', 'WNT5A']
426	GO:BP	GO:0051271	negative regulation of cellular component movement	0.119479	FALSE	"Any process that stops, prevents, or reduces the frequency, rate or extent of the movement of a cellular component." [GOC:ai, GOC:dph, GOC:jl]	384	168	13	18123	0.077381	0.0338542	FB1	['GO:0006928', 'GO:0048523', 'GO:0051270']	['APOD', 'CXCL12', 'DCN', 'FBLN1', 'IGFBP5', 'ITGB1BP1', 'LRP1', 'NBL1', 'PODN', 'SERPINF1', 'SFRP2', 'TGFBR3', 'TIMP1']
427	GO:BP	GO:0044597	daunorubicin metabolic process	0.121326	FALSE	"The chemical reactions and pathways involving daunorubicin, a chemotherapeutic of the anthracycline family that is given as a treatment for some types of cancer." [PMID:20837989]	9	168	3	18123	0.0178571	0.333333	FB1	['GO:0006725', 'GO:0006807', 'GO:0030638', 'GO:0030647', 'GO:1901360', 'GO:1901661']	['AKR1C1', 'AKR1C2', 'AKR1C3']
428	GO:BP	GO:0044598	doxorubicin metabolic process	0.121326	FALSE	"The chemical reactions and pathways involving doxorubicin, an anthracycline antibiotic, used in cancer chemotherapy." [PMID:10200167]	9	168	3	18123	0.0178571	0.333333	FB1	['GO:0006725', 'GO:0006807', 'GO:0016137', 'GO:0030638', 'GO:0034308', 'GO:1901360', 'GO:1901661', 'GO:1902644']	['AKR1C1', 'AKR1C2', 'AKR1C3']
429	GO:BP	GO:0030638	polyketide metabolic process	0.121326	FALSE	"The chemical reactions and pathways involving polyketides, any of a diverse group of natural products synthesized via linear poly-beta-ketones, which are themselves formed by repetitive head-to-tail addition of acetyl (or substituted acetyl) units indirectly derived from acetate (or a substituted acetate) by a mechanism similar to that for fatty acid biosynthesis but without the intermediate red…	9	168	3	18123	0.0178571	0.333333	FB1	['GO:0019748', 'GO:0071704']	['AKR1C1', 'AKR1C2', 'AKR1C3']
430	GO:BP	GO:0032879	regulation of localization	0.121608	FALSE	"Any process that modulates the frequency, rate or extent of any process in which a cell, a substance, or a cellular entity is transported to, or maintained in, a specific location." [GOC:mah]	2906	92	30	18123	0.326087	0.0103235	FB2	['GO:0050789', 'GO:0051179']	['COL1A1', 'COL3A1', 'DPEP1', 'EDNRA', 'EDNRB', 'ENPP2', 'F2R', 'GEM', 'GPC3', 'INHBA', 'KRT16', 'LMO4', 'MAGED1', 'MDK', 'MEF2C', 'NPM1', 'PLK2', 'POSTN', 'PTCH1', 'PTGER3', 'RAB13', 'RBP4', 'SERPINE2', 'SNAI2', 'SOX4', 'SPARC', 'STMN1', 'TNN', 'WNT5A', 'WWTR1']
431	GO:BP	GO:0050878	regulation of body fluid levels	0.121648	FALSE	"Any process that modulates the levels of body fluids." [GOC:ai, GOC:dph, GOC:tb]	519	92	11	18123	0.119565	0.0211946	FB2	['GO:0065008']	['ADAMTS18', 'CCND1', 'COL1A1', 'COL1A2', 'COL3A1', 'EDNRB', 'F2R', 'F2RL2', 'KRT16', 'SERPINE2', 'STMN1']
432	GO:BP	GO:0048666	neuron development	0.125255	FALSE	"The process whose specific outcome is the progression of a neuron over time, from initial commitment of the cell to a specific fate, to the fully functional differentiated cell." [GOC:dph]	1159	92	17	18123	0.184783	0.0146678	FB2	['GO:0030182', 'GO:0048468']	['CDH11', 'EDNRB', 'HES1', 'MDK', 'MEF2C', 'NOTCH3', 'PALLD', 'PLK2', 'POSTN', 'PTCH1', 'RAB13', 'ROBO2', 'STMN1', 'STMN2', 'TNN', 'VIM', 'WNT5A']
433	GO:BP	GO:0090287	regulation of cellular response to growth factor stimulus	0.127494	FALSE	"Any process that modulates the rate, frequency, or extent of a change in state or activity of a cell (in terms of movement, secretion, enzyme production, gene expression, etc.) as a result of a growth factor stimulus." [GOC:tb]	333	168	12	18123	0.0714286	0.036036	FB1	['GO:0048583', 'GO:0050794', 'GO:0071363']	['CHRDL1', 'DCN', 'FBN1', 'FSTL1', 'LTBP4', 'NBL1', 'RBPJ', 'SDCBP', 'SFRP2', 'SFRP4', 'TGFBR3', 'VASN']
434	GO:BP	GO:0000902	cell morphogenesis	0.128137	FALSE	"The developmental process in which the size or shape of a cell is generated and organized." [GOC:clt, GOC:dph, GOC:go_curators, GOC:tb]	1045	92	16	18123	0.173913	0.015311	FB2	['GO:0009653']	['CDH11', 'ENPP2', 'HES1', 'LAMC3', 'MDK', 'MEF2C', 'NOTCH3', 'PALLD', 'POSTN', 'PTCH1', 'ROBO2', 'SPARC', 'STMN1', 'TNMD', 'TNN', 'WNT5A']
435	GO:BP	GO:0001763	morphogenesis of a branching structure	0.128502	FALSE	"The process in which the anatomical structures of branches are generated and organized. A branch is a division or offshoot from a main stem. Examples in animals would include blood vessels, nerves, lymphatics and other endothelial or epithelial tubes." [ISBN:0721662544]	198	92	7	18123	0.076087	0.0353535	FB2	['GO:0009653', 'GO:0032501']	['COL4A1', 'EDNRA', 'GPC3', 'MAGED1', 'MDK', 'PTCH1', 'WNT5A']
436	GO:BP	GO:0048608	reproductive structure development	0.131997	FALSE	"The reproductive developmental process whose specific outcome is the progression of structures that will be used in the process of creating new individuals from one or more parents, from their formation to the mature structures." [GOC:dph, GOC:isa_complete, GOC:jid]	433	92	10	18123	0.108696	0.0230947	FB2	['GO:0003006', 'GO:0048856', 'GO:0061458']	['CCND1', 'HES1', 'HEY2', 'INHBA', 'PTCH1', 'RAB13', 'RBP4', 'ROBO2', 'SERPINE2', 'WNT5A']
437	GO:BP	GO:0060070	canonical Wnt signaling pathway	0.13468	FALSE	"The series of molecular signals initiated by binding of a Wnt protein to a frizzled family receptor on the surface of the target cell, followed by propagation of the signal via beta-catenin, and ending with a change in transcription of target genes. In this pathway, the activated receptor signals via downstream effectors that result in the inhibition of beta-catenin phosphorylation, thereby prev…	349	92	9	18123	0.0978261	0.025788	FB2	['GO:0016055']	['COL1A1', 'DKK3', 'GPC3', 'MDK', 'SNAI2', 'SOX4', 'TNN', 'WNT5A', 'WWTR1']
438	GO:BP	GO:0045926	negative regulation of growth	0.135719	FALSE	"Any process that stops, prevents or reduces the rate or extent of growth, the increase in size or mass of all or part of an organism." [GOC:go_curators]	254	155	10	18123	0.0645161	0.0393701	FB3	['GO:0040007', 'GO:0040008', 'GO:0048519']	['BMP4', 'BST2', 'BTG1', 'FRZB', 'GREM1', 'MT1E', 'MT1M', 'MT1X', 'MT2A', 'SERTAD1']
439	GO:BP	GO:0061458	reproductive system development	0.139788	FALSE	"The progression of the reproductive system over time from its formation to the mature structure. The reproductive system consists of the organs that function in reproduction." [GOC:dph]	436	92	10	18123	0.108696	0.0229358	FB2	['GO:0048731']	['CCND1', 'HES1', 'HEY2', 'INHBA', 'PTCH1', 'RAB13', 'RBP4', 'ROBO2', 'SERPINE2', 'WNT5A']
440	GO:BP	GO:0043065	positive regulation of apoptotic process	0.142408	FALSE	"Any process that activates or increases the frequency, rate or extent of cell death by apoptotic process." [GOC:jl, GOC:mtg_apoptosis]	611	155	16	18123	0.103226	0.0261866	FB3	['GO:0006915', 'GO:0042981', 'GO:0043068']	['ATF3', 'BMP4', 'BTG1', 'CCL2', 'FRZB', 'GADD45B', 'JUN', 'MIR24-2', 'NET1', 'RAPSN', 'RPL26', 'RPS27A', 'RPS3', 'RPS6', 'SIRT2', 'TPD52L1']
441	GO:BP	GO:0030449	regulation of complement activation	0.142573	FALSE	"Any process that modulates the frequency, rate or extent of complement activation." [GOC:go_curators]	110	168	7	18123	0.0416667	0.0636364	FB1	['GO:0002697', 'GO:0002920', 'GO:0006956']	['C1S', 'C3', 'CD55', 'CD81', 'CFH', 'CLU', 'SERPING1']
442	GO:BP	GO:0097305	response to alcohol	0.14488	FALSE	"Any process that results in a change in state or activity of a cell or an organism (in terms of movement, secretion, enzyme production, gene expression, etc.) as a result of an alcohol stimulus." [GOC:pr, PMID:24014527]	256	155	10	18123	0.0645161	0.0390625	FB3	['GO:0010033', 'GO:1901700']	['CA3', 'CLDN5', 'DAG1', 'EEF2', 'FOS', 'FOSB', 'MYC', 'NPPC', 'RPL10A', 'RPL15']
443	GO:BP	GO:0014031	mesenchymal cell development	0.146315	FALSE	"The process aimed at the progression of a mesenchymal cell over time, from initial commitment of the cell to its specific fate, to the fully functional differentiated cell." [GOC:dh, GOC:ef]	86	92	5	18123	0.0543478	0.0581395	FB2	['GO:0048468', 'GO:0048762']	['EDNRA', 'EDNRB', 'HES1', 'HEY2', 'SNAI2']
444	GO:BP	GO:0003138	primary heart field specification	0.146579	FALSE	"The process that results in the delineation of a specific region of the lateral mesoderm into the area which will form the primary beating heart tube. In mammals the primary heart field gives rise to the left ventricle." [GOC:mtg_heart, GOC:rl]	3	92	2	18123	0.0217391	0.666667	FB2	['GO:0003128']	['MEF2C', 'WNT5A']
445	GO:BP	GO:0009893	positive regulation of metabolic process	0.146616	FALSE	"Any process that activates or increases the frequency, rate or extent of the chemical reactions and pathways within a cell or an organism." [GOC:go_curators]	3873	155	54	18123	0.348387	0.0139427	FB3	['GO:0008152', 'GO:0019222', 'GO:0048518']	['ADIRF', 'APOC1', 'APOE', 'ATF3', 'BMP4', 'BTG2', 'CCL2', 'CDKN1C', 'CHCHD10', 'CIRBP', 'CLDN5', 'CSRNP1', 'CXCR4', 'DAG1', 'EEF2', 'EGR1', 'FABP5', 'FGFR4', 'FOS', 'FOSB', 'GADD45B', 'GAPDH', 'GREM1', 'HES1', 'HEY1', 'HLA-E', 'HSP90AB1', 'IL32', 'JUN', 'JUNB', 'KLF10', 'MAFF', 'MIR24-2', 'MYC', 'MYF5', 'MYF6', 'NACA', 'NOTCH3', 'NPM1', 'PITX2', 'RPL26', 'RPL5', 'RPS19', 'RPS2', 'RPS27A', 'RPS3'…
446	GO:BP	GO:0040008	regulation of growth	0.148293	FALSE	"Any process that modulates the frequency, rate or extent of the growth of all or part of an organism so that it occurs at its proper speed, either globally or in a specific part of the organism's development." [GOC:ems, GOC:mah]	680	155	17	18123	0.109677	0.025	FB3	['GO:0040007', 'GO:0050789']	['APOE', 'BMP4', 'BST2', 'BTG1', 'CXCR4', 'FRZB', 'GREM1', 'MT1E', 'MT1M', 'MT1X', 'MT2A', 'NACA', 'NET1', 'NPM1', 'NPPC', 'SERTAD1', 'SOCS3']
447	GO:BP	GO:0071280	cellular response to copper ion	0.15498	FALSE	"Any process that results in a change in state or activity of a cell (in terms of movement, secretion, enzyme production, gene expression, etc.) as a result of a copper ion stimulus." [GOC:mah]	27	155	4	18123	0.0258065	0.148148	FB3	['GO:0046688', 'GO:0071248']	['MT1E', 'MT1M', 'MT1X', 'MT2A']
448	GO:BP	GO:0009968	negative regulation of signal transduction	0.156392	FALSE	"Any process that stops, prevents, or reduces the frequency, rate or extent of signal transduction." [GOC:sm]	1394	168	28	18123	0.166667	0.0200861	FB1	['GO:0007165', 'GO:0009966', 'GO:0010648', 'GO:0023057', 'GO:0048585']	['ACKR3', 'ADM', 'APOD', 'CHRDL1', 'CLU', 'CTHRC1', 'CXCL12', 'DCN', 'ECM1', 'FBLN1', 'FBN1', 'FSTL1', 'IGFBP5', 'IGFBP6', 'IL6ST', 'ITGB1BP1', 'LEPROT', 'LGALS3', 'LRP1', 'NBL1', 'SFRP2', 'SFRP4', 'SLIT3', 'TGFBR3', 'TIMP2', 'TIMP3', 'TMSB4X', 'VASN']
449	GO:BP	GO:0007169	transmembrane receptor protein tyrosine kinase signaling pathway	0.156725	FALSE	"A series of molecular signals initiated by the binding of an extracellular ligand to a receptor on the surface of the target cell where the receptor possesses tyrosine kinase activity, and ending with regulation of a downstream cellular process, e.g. transcription." [GOC:ceb, GOC:signaling]	759	168	19	18123	0.113095	0.0250329	FB1	['GO:0007167']	['ANGPTL1', 'APOD', 'AXL', 'DCN', 'EFEMP1', 'GFRA1', 'IGFBP5', 'IGFBP6', 'LEPROT', 'LRP1', 'MMP2', 'PDGFD', 'PDGFRB', 'PDGFRL', 'POLR2L', 'RBPJ', 'SDC2', 'SDCBP', 'TXNIP']
450	GO:BP	GO:0045661	regulation of myoblast differentiation	0.161242	FALSE	"Any process that modulates the frequency, rate or extent of myoblast differentiation. A myoblast is a mononucleate cell type that, by fusion with other myoblasts, gives rise to the myotubes that eventually develop into skeletal muscle fibers." [CL:0000056, GOC:go_curators, GOC:mtg_muscle]	52	155	5	18123	0.0322581	0.0961538	FB3	['GO:0045445', 'GO:0045595']	['BMP4', 'BTG1', 'KLHL41', 'MYF5', 'MYF6']
451	GO:BP	GO:0045445	myoblast differentiation	0.166663	FALSE	"The process in which a relatively unspecialized cell acquires specialized features of a myoblast. A myoblast is a mononucleate cell type that, by fusion with other myoblasts, gives rise to the myotubes that eventually develop into striated muscle fibers." [CL:0000056, GOC:go_curators, GOC:mtg_muscle]	84	155	6	18123	0.0387097	0.0714286	FB3	['GO:0030154', 'GO:0061061']	['BMP4', 'BTG1', 'GREM1', 'KLHL41', 'MYF5', 'MYF6']
452	GO:BP	GO:0051348	negative regulation of transferase activity	0.167636	FALSE	"Any process that stops or reduces the rate of transferase activity, the catalysis of the transfer of a group, e.g. a methyl group, glycosyl group, acyl group, phosphorus-containing, or other groups, from a donor compound to an acceptor." [GOC:ai]	314	155	11	18123	0.0709677	0.0350318	FB3	['GO:0043086', 'GO:0051338']	['APOE', 'BMP4', 'CDKN1C', 'EIF4A2', 'GADD45B', 'MIDN', 'MIR24-2', 'NPM1', 'RPL5', 'SOCS3', 'ZFP36']
453	GO:BP	GO:2000145	regulation of cell motility	0.169275	FALSE	"Any process that modulates the frequency, rate or extent of cell motility." [GOC:mah]	1070	92	16	18123	0.173913	0.0149533	FB2	['GO:0040012', 'GO:0048870', 'GO:0051270']	['COL1A1', 'COL3A1', 'DPEP1', 'ENPP2', 'F2R', 'KRT16', 'LMO4', 'MDK', 'MEF2C', 'PLK2', 'POSTN', 'SERPINE2', 'SNAI2', 'SPARC', 'TNN', 'WNT5A']
454	GO:BP	GO:0014911	positive regulation of smooth muscle cell migration	0.170063	FALSE	"Any process that activates, maintains or increases the frequency, rate or extent of smooth muscle cell migration." [CL:0000192, GOC:mtg_muscle]	49	168	5	18123	0.0297619	0.102041	FB1	['GO:0014909', 'GO:0014910', 'GO:0030335']	['IGFBP5', 'LRP1', 'PDGFD', 'PDGFRB', 'S100A11']
455	GO:BP	GO:0097278	complement-dependent cytotoxicity	0.172142	FALSE	"Cell killing caused by the membrane attack complex formed following complement activation." [GOC:add, GOC:rv]	10	168	3	18123	0.0178571	0.3	FB1	['GO:0001906']	['C3', 'CD55', 'CFH']
456	GO:BP	GO:0030647	aminoglycoside antibiotic metabolic process	0.172142	FALSE	"The chemical reactions and pathways involving an aminoglycoside antibiotic, any member of a group of broad spectrum antibiotics, of similar toxicity and pharmacology, that contain an aminodeoxysugar, an amino- or guanidino-substituted inositol ring, and one or more residues of other sugars. The group includes streptomycin, neomycin, framycetin, kanamycin, paromomycin, and gentamicin." [GOC:mah, …	10	168	3	18123	0.0178571	0.3	FB1	['GO:0016137']	['AKR1C1', 'AKR1C2', 'AKR1C3']
457	GO:BP	GO:0072006	nephron development	0.177332	FALSE	"The process whose specific outcome is the progression of the nephron over time, from its formation to the mature structure. A nephron is the functional unit of the kidney." [GOC:mtg_kidney_jan10]	144	92	6	18123	0.0652174	0.0416667	FB2	['GO:0001822', 'GO:0048856']	['GPC3', 'HES1', 'MAGED1', 'MEF2C', 'PTCH1', 'WWTR1']
458	GO:BP	GO:0032963	collagen metabolic process	0.178736	FALSE	"The chemical reactions and pathways involving collagen, any of a group of fibrous proteins of very high tensile strength that form the main component of connective tissue in animals. Collagen is highly enriched in glycine (some regions are 33% glycine) and proline, occurring predominantly as 3-hydroxyproline (about 20%)." [GOC:mah, ISBN:0198506732]	114	168	7	18123	0.0416667	0.0614035	FB1	['GO:0008152']	['CST3', 'CTSK', 'MFAP4', 'MMP2', 'MRC2', 'PDGFRB', 'TNXB']
459	GO:BP	GO:0051254	positive regulation of RNA metabolic process	0.17914	FALSE	"Any process that activates or increases the frequency, rate or extent of the chemical reactions and pathways involving RNA." [GOC:ai]	1775	155	31	18123	0.2	0.0174648	FB3	['GO:0010604', 'GO:0016070', 'GO:0045935', 'GO:0051252']	['ADIRF', 'APOE', 'ATF3', 'BMP4', 'BTG2', 'CDKN1C', 'CHCHD10', 'CIRBP', 'CSRNP1', 'EGR1', 'FOS', 'FOSB', 'GREM1', 'HES1', 'HEY1', 'JUN', 'JUNB', 'KLF10', 'MAFF', 'MYC', 'MYF5', 'MYF6', 'NACA', 'NOTCH3', 'NPM1', 'PITX2', 'RPS27A', 'RXRG', 'SERTAD1', 'SIRT2', 'ZFP36']
460	GO:BP	GO:0048483	autonomic nervous system development	0.180498	FALSE	"The process whose specific outcome is the progression of the autonomic nervous system over time, from its formation to the mature structure. The autonomic nervous system is composed of neurons that are not under conscious control, and is comprised of two antagonistic components, the sympathetic and parasympathetic nervous systems. The autonomic nervous system regulates key functions including th…	47	92	4	18123	0.0434783	0.0851064	FB2	['GO:0007399', 'GO:0048731']	['EDNRA', 'EDNRB', 'HES1', 'SOX4']
461	GO:BP	GO:0006950	response to stress	0.185147	FALSE	"Any process that results in a change in state or activity of a cell or an organism (in terms of movement, secretion, enzyme production, gene expression, etc.) as a result of a disturbance in organismal or cellular homeostasis, usually, but not necessarily, exogenous (e.g. temperature, humidity, ionizing radiation)." [GOC:mah]	4321	168	62	18123	0.369048	0.0143485	FB1	['GO:0050896']	['ABI3BP', 'ACKR3', 'ADM', 'AKR1C3', 'APOD', 'AXL', 'C1R', 'C1S', 'C3', 'CD34', 'CD55', 'CD81', 'CFD', 'CFH', 'CLU', 'CRIP1', 'CST3', 'CXCL12', 'DCN', 'ECM1', 'ENTPD1', 'FBLN1', 'FBLN5', 'GPX3', 'GPX4', 'GSN', 'HSPG2', 'IGFBP7', 'IL6ST', 'LGALS3', 'LRP1', 'MAN1A1', 'MFAP4', 'MGST1', 'MMP2', 'NDRG1', 'NT5E', 'NUPR1', 'PAM', 'PDGFD', 'PDGFRB', 'POLR2L', 'PPL', 'PTGES', 'PTGIS', 'RAMP2', 'RBPJ', 'SC…
462	GO:BP	GO:0051797	regulation of hair follicle development	0.187989	FALSE	"Any process that modulates the frequency, rate or extent of hair follicle development." [GOC:ai]	18	92	3	18123	0.0326087	0.166667	FB2	['GO:0001942', 'GO:0042634', 'GO:2000026']	['INHBA', 'KRT17', 'WNT5A']
463	GO:BP	GO:0007565	female pregnancy	0.1885	FALSE	"The set of physiological processes that allow an embryo or foetus to develop within the body of a female animal. It covers the time from fertilization of a female ovum by a male spermatozoon until birth." [ISBN:0192800825]	198	168	9	18123	0.0535714	0.0454545	FB1	['GO:0044703', 'GO:0044706']	['ADM', 'FBLN1', 'IGFBP5', 'IGFBP7', 'MMP2', 'PAM', 'RAMP2', 'TIMP1', 'TPPP3']
464	GO:BP	GO:0014033	neural crest cell differentiation	0.191523	FALSE	"The process in which a relatively unspecialized cell acquires specialized features of a neural crest cell." [GOC:dh, GOC:ef]	91	92	5	18123	0.0543478	0.0549451	FB2	['GO:0048762', 'GO:0048863']	['EDNRA', 'EDNRB', 'HES1', 'MEF2C', 'SNAI2']
465	GO:BP	GO:0043068	positive regulation of programmed cell death	0.196082	FALSE	"Any process that activates or increases the frequency, rate or extent of programmed cell death, cell death resulting from activation of endogenous cellular processes." [GOC:jl]	628	155	16	18123	0.103226	0.0254777	FB3	['GO:0010942', 'GO:0012501', 'GO:0043067']	['ATF3', 'BMP4', 'BTG1', 'CCL2', 'FRZB', 'GADD45B', 'JUN', 'MIR24-2', 'NET1', 'RAPSN', 'RPL26', 'RPS27A', 'RPS3', 'RPS6', 'SIRT2', 'TPD52L1']
466	GO:BP	GO:0042221	response to chemical	0.200668	FALSE	"Any process that results in a change in state or activity of a cell or an organism (in terms of movement, secretion, enzyme production, gene expression, etc.) as a result of a chemical stimulus." [GOC:jl]	4829	155	63	18123	0.406452	0.0130462	FB3	['GO:0050896']	['ADIRF', 'APOE', 'ATF3', 'BMP4', 'BST2', 'BTG1', 'BTG2', 'CA3', 'CCL2', 'CDKN1C', 'CLDN5', 'COL18A1', 'CXCR4', 'DAG1', 'DDIT4', 'EEF2', 'EGR1', 'EIF4A2', 'FGFR4', 'FOS', 'FOSB', 'GAPDH', 'GREM1', 'HES1', 'HEY1', 'HLA-E', 'HSP90AB1', 'IL32', 'IMPDH2', 'JUN', 'JUNB', 'KLF10', 'MAT2A', 'MIR24-2', 'MSC', 'MT1E', 'MT1M', 'MT1X', 'MT2A', 'MYC', 'NET1', 'NOTCH3', 'NPM1', 'NPPC', 'PDK4', 'PEG10', 'PON2'…
467	GO:BP	GO:0000470	maturation of LSU-rRNA	0.206967	FALSE	"Any process involved in the maturation of a precursor Large SubUnit (LSU) ribosomal RNA (rRNA) molecule into a mature LSU-rRNA molecule." [GOC:curators]	29	155	4	18123	0.0258065	0.137931	FB3	['GO:0006364', 'GO:0042273']	['RPL10A', 'RPL7', 'RPL7A', 'RSL1D1']
468	GO:BP	GO:0030509	BMP signaling pathway	0.210322	FALSE	"A series of molecular signals initiated by the binding of a member of the BMP (bone morphogenetic protein) family to a receptor on the surface of a target cell, and ending with regulation of a downstream cellular process, e.g. transcription." [GOC:signaling, ISBN:0878932437, PMID:17428827]	157	168	8	18123	0.047619	0.0509554	FB1	['GO:0007178', 'GO:0071773']	['CHRDL1', 'FBN1', 'FSTL1', 'NBL1', 'RBPJ', 'SFRP2', 'SFRP4', 'TGFBR3']
469	GO:BP	GO:0001657	ureteric bud development	0.212339	FALSE	"The process whose specific outcome is the progression of the ureteric bud over time, from its formation to the mature structure." [GOC:go_curators]	93	92	5	18123	0.0543478	0.0537634	FB2	['GO:0072164']	['GPC3', 'HES1', 'MAGED1', 'PTCH1', 'ROBO2']
470	GO:BP	GO:0040013	negative regulation of locomotion	0.219634	FALSE	"Any process that stops, prevents, or reduces the frequency, rate or extent of locomotion of a cell or organism." [GOC:go_curators]	408	168	13	18123	0.077381	0.0318627	FB1	['GO:0040011', 'GO:0040012', 'GO:0048519']	['APOD', 'CXCL12', 'DCN', 'FBLN1', 'IGFBP5', 'ITGB1BP1', 'LRP1', 'NBL1', 'PODN', 'SEMA3C', 'SERPINF1', 'SFRP2', 'TIMP1']
471	GO:BP	GO:0031623	receptor internalization	0.222042	FALSE	"A receptor-mediated endocytosis process that results in the movement of receptors from the plasma membrane to the inside of the cell. The process begins when cell surface receptors are monoubiquitinated following ligand-induced activation. Receptors are subsequently taken up into endocytic vesicles from where they are either targeted to the lysosome or vacuole for degradation or recycled back to…	118	168	7	18123	0.0416667	0.059322	FB1	['GO:0006898', 'GO:0043112']	['ACKR3', 'ADM', 'CD81', 'LRP1', 'RAMP2', 'SDCBP', 'SFRP4']
472	GO:BP	GO:0003128	heart field specification	0.222417	FALSE	"The process that results in the delineation of a specific region of the lateral mesoderm into the area in which the heart will develop." [GOC:mtg_heart]	19	92	3	18123	0.0326087	0.157895	FB2	['GO:0010092', 'GO:0060914']	['MEF2C', 'ROBO2', 'WNT5A']
473	GO:BP	GO:0072163	mesonephric epithelium development	0.223377	FALSE	"The process whose specific outcome is the progression of an epithelium in the mesonephros over time, from its formation to the mature structure. An epithelium is a tissue that covers the internal or external surfaces of an anatomical structure." [GOC:mtg_kidney_jan10]	94	92	5	18123	0.0543478	0.0531915	FB2	['GO:0001823', 'GO:0072073']	['GPC3', 'HES1', 'MAGED1', 'PTCH1', 'ROBO2']
474	GO:BP	GO:0072164	mesonephric tubule development	0.223377	FALSE	"The progression of a mesonephric tubule over time, from its initial formation to the mature structure. A mesonephric tubule is an epithelial tube that is part of the mesonephros." [GOC:mtg_kidney_jan10]	94	92	5	18123	0.0543478	0.0531915	FB2	['GO:0035295', 'GO:0072163']	['GPC3', 'HES1', 'MAGED1', 'PTCH1', 'ROBO2']
475	GO:BP	GO:0009966	regulation of signal transduction	0.225469	FALSE	"Any process that modulates the frequency, rate or extent of signal transduction." [GOC:sm]	3251	168	50	18123	0.297619	0.0153799	FB1	['GO:0007165', 'GO:0010646', 'GO:0023051', 'GO:0048583']	['ACKR3', 'ADM', 'AKAP12', 'AKR1C2', 'AKR1C3', 'APOD', 'AXL', 'C3', 'CD55', 'CD81', 'CHRDL1', 'CLU', 'CTHRC1', 'CXCL12', 'DCN', 'ECM1', 'FBLN1', 'FBN1', 'FSTL1', 'GAS1', 'GPNMB', 'IGFBP5', 'IGFBP6', 'IGFBP7', 'IL6ST', 'ITGB1BP1', 'LEPROT', 'LGALS3', 'LRP1', 'LTBP4', 'LY6E', 'NBL1', 'NUPR1', 'PDGFD', 'PDGFRB', 'PTGIS', 'RAMP2', 'RBPJ', 'S100A13', 'SDCBP', 'SFRP2', 'SFRP4', 'SLIT3', 'TGFBR3', 'TIMP…
476	GO:BP	GO:0006693	prostaglandin metabolic process	0.226651	FALSE	"The chemical reactions and pathways involving prostaglandins, any of a group of biologically active metabolites which contain a cyclopentane ring due to the formation of a bond between two carbons of a fatty acid. They have a wide range of biological activities." [ISBN:0198506732]	52	168	5	18123	0.0297619	0.0961538	FB1	['GO:0006692']	['AKR1C1', 'AKR1C2', 'AKR1C3', 'PTGES', 'PTGIS']
477	GO:BP	GO:0006692	prostanoid metabolic process	0.226651	FALSE	"The chemical reactions and pathways involving prostanoids, any compound based on or derived from the prostanoate structure." [ISBN:0198506732]	52	168	5	18123	0.0297619	0.0961538	FB1	['GO:0006690', 'GO:0033559']	['AKR1C1', 'AKR1C2', 'AKR1C3', 'PTGES', 'PTGIS']
478	GO:BP	GO:1901654	response to ketone	0.227881	FALSE	"A response that results in a state of tolerance to ketone." [GOC:mengo_curators, PMID:23356676]	203	168	9	18123	0.0535714	0.044335	FB1	['GO:0010033', 'GO:1901700']	['AKR1C2', 'AKR1C3', 'FIBIN', 'IGFBP7', 'RAMP2', 'SERPINF1', 'SLIT3', 'TGFBR3', 'TXNIP']
479	GO:BP	GO:0009612	response to mechanical stimulus	0.227929	FALSE	"Any process that results in a change in state or activity of a cell or an organism (in terms of movement, secretion, enzyme production, gene expression, etc.) as a result of a mechanical stimulus." [GOC:hb]	217	92	7	18123	0.076087	0.0322581	FB2	['GO:0009605', 'GO:0009628']	['COL11A1', 'COL1A1', 'COL3A1', 'MDK', 'POSTN', 'PTCH1', 'SERPINE2']
480	GO:BP	GO:0010557	positive regulation of macromolecule biosynthetic process	0.230208	FALSE	"Any process that increases the rate, frequency or extent of the chemical reactions and pathways resulting in the formation of a macromolecule, any molecule of high relative molecular mass, the structure of which essentially comprises the multiple repetition of units derived, actually or conceptually, from molecules of low relative molecular mass." [GOC:dph, GOC:tb]	1859	92	22	18123	0.23913	0.0118343	FB2	['GO:0009059', 'GO:0009891', 'GO:0010556', 'GO:0010604']	['COL1A1', 'CREB3L1', 'F2R', 'HES1', 'HEY2', 'HMGN1', 'HNRNPA1', 'INHBA', 'KRT17', 'LMO4', 'LUM', 'MAGED1', 'MDK', 'MEF2C', 'NOTCH3', 'NPM1', 'PABPC1', 'PTCH1', 'SOX4', 'VIM', 'WNT5A', 'WWTR1']
481	GO:BP	GO:0070482	response to oxygen levels	0.230564	FALSE	"Any process that results in a change in state or activity of a cell or an organism (in terms of movement, secretion, enzyme production, gene expression, etc.) as a result of a stimulus reflecting the presence, absence, or concentration of oxygen." [GOC:BHF, GOC:mah]	410	168	13	18123	0.077381	0.0317073	FB1	['GO:0009628']	['ADM', 'CD34', 'CXCL12', 'MMP2', 'NDRG1', 'PAM', 'PDGFRB', 'PTGIS', 'RAMP2', 'RBPJ', 'SOD3', 'TGFBR3', 'VASN']
482	GO:BP	GO:0022617	extracellular matrix disassembly	0.23354	FALSE	"A process that results in the breakdown of the extracellular matrix." [GOC:jid]	83	168	6	18123	0.0357143	0.0722892	FB1	['GO:0022411', 'GO:0030198']	['CST3', 'CTSK', 'LRP1', 'MMP2', 'TIMP1', 'TIMP2']
483	GO:BP	GO:0033559	unsaturated fatty acid metabolic process	0.234103	FALSE	"The chemical reactions and pathways involving an unsaturated fatty acid, any fatty acid containing one or more double bonds between carbon atoms." [GOC:mah]	119	168	7	18123	0.0416667	0.0588235	FB1	['GO:0006631']	['AKR1C1', 'AKR1C2', 'AKR1C3', 'EPHX1', 'GPX4', 'PTGES', 'PTGIS']
484	GO:BP	GO:0019371	cyclooxygenase pathway	0.235083	FALSE	"The chemical reactions and pathways by which prostaglandins are formed from arachidonic acid, and in which prostaglandin-endoperoxide synthase (cyclooxygenase) catalyzes the committed step in the conversion of arachidonic acid to the prostaglandin-endoperoxides PGG2 and PGH2." [PMID:19854273]	11	168	3	18123	0.0178571	0.272727	FB1	['GO:0001516', 'GO:0019369']	['AKR1C3', 'PTGES', 'PTGIS']
485	GO:BP	GO:0034250	positive regulation of cellular amide metabolic process	0.235584	FALSE	"Any process that activates or increases the frequency, rate or extent of the chemical reactions and pathways involving amides." [GOC:mah]	172	155	8	18123	0.0516129	0.0465116	FB3	['GO:0031325', 'GO:0034248', 'GO:0043603', 'GO:0051173']	['CIRBP', 'EEF2', 'MYC', 'NPM1', 'RPL26', 'RPL5', 'RPS4X', 'RPS9']
486	GO:BP	GO:0051716	cellular response to stimulus	0.244275	FALSE	"Any process that results in a change in state or activity of a cell (in terms of movement, secretion, enzyme production, gene expression, etc.) as a result of a stimulus. The process begins with detection of the stimulus by a cell and ends with a change in state or activity or the cell." [GOC:bf, GOC:jl]	7873	168	97	18123	0.577381	0.0123206	FB1	['GO:0009987', 'GO:0050896']	['ACKR3', 'ACKR4', 'ADM', 'AKAP12', 'AKR1C1', 'AKR1C2', 'AKR1C3', 'ANGPTL1', 'ANK2', 'APOD', 'AXL', 'C3', 'CD34', 'CD55', 'CD81', 'CFD', 'CHRDL1', 'CLEC3B', 'CLU', 'CRIP1', 'CTHRC1', 'CTSK', 'CXCL12', 'CYB5R3', 'DCN', 'ECM1', 'EFEMP1', 'ENTPD1', 'EPHX1', 'FBLN1', 'FBLN5', 'FBN1', 'FIBIN', 'FSTL1', 'GAS1', 'GFRA1', 'GNG11', 'GPNMB', 'GPX3', 'GPX4', 'GSN', 'HSD3B7', 'IGFBP5', 'IGFBP6', 'IGFBP7', 'I…
487	GO:BP	GO:0030178	negative regulation of Wnt signaling pathway	0.248193	FALSE	"Any process that stops, prevents, or reduces the frequency, rate or extent of the Wnt signaling pathway." [GOC:dph, GOC:go_curators, GOC:tb]	220	92	7	18123	0.076087	0.0318182	FB2	['GO:0009968', 'GO:0016055', 'GO:0030111']	['DKK3', 'GPC3', 'MDK', 'SNAI2', 'TNN', 'WNT5A', 'WWTR1']
488	GO:BP	GO:0001570	vasculogenesis	0.249596	FALSE	"The differentiation of endothelial cells from progenitor cells during blood vessel development, and the de novo formation of blood vessels and tubes." [PMID:8999798]	84	168	6	18123	0.0357143	0.0714286	FB1	['GO:0030154', 'GO:0048514']	['ACKR3', 'ADM', 'CD34', 'PDGFRB', 'RAMP2', 'TGFBR3']
489	GO:BP	GO:0061307	cardiac neural crest cell differentiation involved in heart development	0.255122	FALSE	"The process in which a relatively unspecialized cell acquires specialized features of a cardiac neural crest cell that will migrate to the heart and contribute to its development. Cardiac neural crest cells are specialized cells that migrate toward the heart from the third, fourth and sixth pharyngeal arches." [GOC:dph, GOC:mtg_heart, PMID:19705442]	12	155	3	18123	0.0193548	0.25	FB3	['GO:0014033', 'GO:0035051']	['BMP4', 'HES1', 'PITX2']
490	GO:BP	GO:0061308	cardiac neural crest cell development involved in heart development	0.255122	FALSE	"The process aimed at the progression of a cardiac neural crest cell over time, from initial commitment of the cell to its specific fate, to the fully functional differentiated cell that contributes to the development of the heart." [GOC:dph, GOC:mtg_heart]	12	155	3	18123	0.0193548	0.25	FB3	['GO:0014032', 'GO:0061307']	['BMP4', 'HES1', 'PITX2']
491	GO:BP	GO:0051239	regulation of multicellular organismal process	0.256317	FALSE	"Any process that modulates the frequency, rate or extent of a multicellular organismal process, the processes pertinent to the function of a multicellular organism above the cellular level; includes the integrated processes of tissues and organs." [GOC:ai, GOC:dph, GOC:tb]	2888	155	43	18123	0.277419	0.0148892	FB3	['GO:0032501', 'GO:0050789']	['ALDH1A1', 'ANGPTL4', 'APOC1', 'APOE', 'BMP4', 'BST2', 'BTG1', 'CHODL', 'CLDN5', 'CXCR4', 'DAG1', 'DES', 'EGR1', 'FABP5', 'FOS', 'FRZB', 'FXYD6', 'GAPDH', 'GPM6B', 'GREM1', 'HES1', 'HEY1', 'HLA-E', 'HSP90AB1', 'IL32', 'JUN', 'KLF10', 'MAFF', 'MIR24-2', 'MYC', 'MYF5', 'MYF6', 'NACA', 'NDRG2', 'NPPC', 'PDK4', 'RPS19', 'RPS3', 'SERPINB1', 'SGCA', 'SIRT2', 'TRDN', 'ZFP36']
492	GO:BP	GO:0030111	regulation of Wnt signaling pathway	0.25702	FALSE	"Any process that modulates the frequency, rate or extent of the activity of the Wnt signal transduction pathway." [GOC:dph, GOC:mah, GOC:tb]	380	92	9	18123	0.0978261	0.0236842	FB2	['GO:0009966', 'GO:0016055']	['COL1A1', 'DKK3', 'GPC3', 'MDK', 'SNAI2', 'SOX4', 'TNN', 'WNT5A', 'WWTR1']
493	GO:BP	GO:0060349	bone morphogenesis	0.259145	FALSE	"The process in which bones are generated and organized." [GOC:dph]	97	92	5	18123	0.0543478	0.0515464	FB2	['GO:0009887', 'GO:0048705', 'GO:0060348']	['ALPL', 'COL1A1', 'MEF2C', 'SERPINH1', 'TMEM119']
494	GO:BP	GO:0051094	positive regulation of developmental process	0.261003	FALSE	"Any process that activates or increases the rate or extent of development, the biological process whose specific outcome is the progression of an organism over time from an initial condition (e.g. a zygote, or a young adult) to a later condition (e.g. a multicellular animal or an aged adult)." [GOC:ai]	1354	92	18	18123	0.195652	0.0132939	FB2	['GO:0032502', 'GO:0048518', 'GO:0050793']	['CCND1', 'COL1A1', 'ENPP2', 'HES1', 'HEY2', 'INHBA', 'KRT17', 'MAGED1', 'MDK', 'MEF2C', 'NAP1L1', 'PTCH1', 'ROBO2', 'SERPINE2', 'SOX4', 'TMEM119', 'WNT5A', 'WWTR1']
495	GO:BP	GO:0055001	muscle cell development	0.265534	FALSE	"The process whose specific outcome is the progression of a muscle cell over time, from its formation to the mature structure. Muscle cell development does not include the steps involved in committing an unspecified cell to the muscle cell fate." [CL:0000187, GOC:devbiol]	175	155	8	18123	0.0516129	0.0457143	FB3	['GO:0042692', 'GO:0048468']	['BMP4', 'HES1', 'KLHL41', 'MIR24-2', 'MYF5', 'MYF6', 'NACA', 'STAC3']
496	GO:BP	GO:0051099	positive regulation of binding	0.265534	FALSE	"Any process that activates or increases the rate or extent of binding, the selective interaction of a molecule with one or more specific sites on another molecule." [GOC:ai]	175	155	8	18123	0.0516129	0.0457143	FB3	['GO:0044093', 'GO:0051098']	['APOE', 'BMP4', 'CLDN5', 'HES1', 'HSP90AB1', 'IL32', 'MYC', 'SIRT2']
497	GO:BP	GO:0009719	response to endogenous stimulus	0.267384	FALSE	"Any process that results in a change in state or activity of a cell or an organism (in terms of movement, secretion, enzyme production, gene expression, etc.) as a result of a stimulus arising within the organism." [GOC:sm]	1729	155	30	18123	0.193548	0.0173511	FB3	['GO:0050896']	['APOE', 'BMP4', 'BTG1', 'BTG2', 'CCL2', 'CDKN1C', 'CLDN5', 'DAG1', 'DDIT4', 'EEF2', 'EGR1', 'FGFR4', 'FOS', 'FOSB', 'GREM1', 'HES1', 'HEY1', 'HSP90AB1', 'JUN', 'KLF10', 'MYC', 'PDK4', 'PEG10', 'PTPRE', 'RPS27A', 'RXRG', 'SIRT2', 'SOCS3', 'UGCG', 'ZFP36']
498	GO:BP	GO:0060674	placenta blood vessel development	0.270566	FALSE	"The process whose specific outcome is the progression of a blood vessel of the placenta over time, from its formation to the mature structure." [GOC:dph, PMID:16916377]	31	155	4	18123	0.0258065	0.129032	FB3	['GO:0001568', 'GO:0001890', 'GO:0003006']	['HES1', 'HEY1', 'JUNB', 'SOCS3']
499	GO:BP	GO:1905048	regulation of metallopeptidase activity	0.271559	FALSE	"Any process that modulates the frequency, rate or extent of metallopeptidase activity." [GO_REF:0000059, GOC:TermGenie, PMID:26473732]	29	168	4	18123	0.0238095	0.137931	FB1	['GO:0052547']	['LRP1', 'TIMP1', 'TIMP2', 'TIMP3']
500	GO:BP	GO:0055114	obsolete oxidation-reduction process	0.271581	FALSE	"OBSOLETE. A metabolic process that results in the removal or addition of one or more electrons to or from a substance, with or without the concomitant removal or addition of a proton or protons." [GOC:dhl, GOC:ecd, GOC:jh2, GOC:jid, GOC:mlg, GOC:rph]	475	168	14	18123	0.0833333	0.0294737	FB1	[]	['ADH1B', 'AKR1C1', 'AKR1C2', 'AKR1C3', 'AOX1', 'CYB5R3', 'GPX3', 'GPX4', 'HSD3B7', 'MT-ND2', 'PAM', 'PTGIS', 'SOD3', 'VAT1']
501	GO:BP	GO:0001823	mesonephros development	0.271992	FALSE	"The process whose specific outcome is the progression of the mesonephros over time, from its formation to the mature structure. In mammals, the mesonephros is the second of the three embryonic kidneys to be established and exists only transiently. In lower vertebrates such as fish and amphibia, the mesonephros will form the mature kidney." [GOC:dph, ISBN:0124020607, ISBN:0721662544, PMID:1053531…	98	92	5	18123	0.0543478	0.0510204	FB2	['GO:0001822']	['GPC3', 'HES1', 'MAGED1', 'PTCH1', 'ROBO2']
502	GO:BP	GO:0010604	positive regulation of macromolecule metabolic process	0.275973	FALSE	"Any process that increases the frequency, rate or extent of the chemical reactions and pathways involving macromolecules, any molecule of high relative molecular mass, the structure of which essentially comprises the multiple repetition of units derived, actually or conceptually, from molecules of low relative molecular mass." [GOC:dph, GOC:tb]	3568	155	50	18123	0.322581	0.0140135	FB3	['GO:0009893', 'GO:0043170', 'GO:0060255']	['ADIRF', 'APOE', 'ATF3', 'BMP4', 'BTG2', 'CCL2', 'CDKN1C', 'CHCHD10', 'CIRBP', 'CLDN5', 'CSRNP1', 'CXCR4', 'DAG1', 'EEF2', 'EGR1', 'FGFR4', 'FOS', 'FOSB', 'GADD45B', 'GAPDH', 'GREM1', 'HES1', 'HEY1', 'HLA-E', 'HSP90AB1', 'IL32', 'JUN', 'JUNB', 'KLF10', 'MAFF', 'MYC', 'MYF5', 'MYF6', 'NACA', 'NOTCH3', 'NPM1', 'PITX2', 'RPL26', 'RPL5', 'RPS2', 'RPS27A', 'RPS3', 'RPS4X', 'RPS9', 'RXRG', 'SERTAD1', …
503	GO:BP	GO:0007507	heart development	0.27724	FALSE	"The process whose specific outcome is the progression of the heart over time, from its formation to the mature structure. The heart is a hollow, muscular organ, which, by contracting rhythmically, keeps up the circulation of the blood." [GOC:jid, UBERON:0000948]	598	168	16	18123	0.0952381	0.0267559	FB1	['GO:0048513', 'GO:0072359']	['ABI3BP', 'ADM', 'ANK2', 'CRIP1', 'ELN', 'FBN1', 'LY6E', 'PAM', 'PDGFRB', 'PI16', 'RAMP2', 'RBPJ', 'SEMA3C', 'SFRP2', 'SLIT3', 'TGFBR3']
504	GO:BP	GO:1901701	cellular response to oxygen-containing compound	0.277525	FALSE	"Any process that results in a change in state or activity of a cell (in terms of movement, secretion, enzyme production, gene expression, etc.) as a result of an oxygen-containing compound stimulus." [GOC:pr, GOC:TermGenie]	1237	92	17	18123	0.184783	0.0137429	FB2	['GO:0070887', 'GO:1901700']	['COL1A1', 'COL1A2', 'COL4A1', 'COL5A2', 'COL6A1', 'DPEP1', 'EDNRB', 'ID3', 'INHBA', 'MEF2C', 'PTCH1', 'RAB13', 'SNAI2', 'SOX4', 'UGT3A2', 'VIM', 'WNT5A']
505	GO:BP	GO:0048522	positive regulation of cellular process	0.279423	FALSE	"Any process that activates or increases the frequency, rate or extent of a cellular process, any of those that are carried out at the cellular level, but are not necessarily restricted to a single cell. For example, cell communication occurs among more than one cell, but occurs at the cellular level." [GOC:jid]	5863	92	47	18123	0.51087	0.00801637	FB2	['GO:0009987', 'GO:0048518', 'GO:0050794']	['CCND1', 'CLEC11A', 'COL1A1', 'COL3A1', 'CREB3L1', 'EDNRB', 'ENHO', 'ENPP2', 'F2R', 'F2RL2', 'FSCN1', 'GPC3', 'HES1', 'HEY2', 'HMGN1', 'HNRNPA1', 'ID3', 'IL11RA', 'INHBA', 'KRT17', 'LMO4', 'LUM', 'MAGED1', 'MARCKSL1', 'MDK', 'MEF2C', 'NAP1L1', 'NOTCH3', 'NPM1', 'PABPC1', 'PHLDA1', 'PLK2', 'POSTN', 'PTCH1', 'RAB34', 'RBP4', 'ROBO2', 'SERPINE2', 'SNAI2', 'SOX4', 'SPARC', 'STMN1', 'STMN2', 'TMEM119…
506	GO:BP	GO:0072132	mesenchyme morphogenesis	0.289523	FALSE	"The process in which the anatomical structures of a mesenchymal tissue are generated and organized. A mesenchymal tissue is made up of loosely packed stellate cells." [GOC:mtg_kidney_jan10]	53	92	4	18123	0.0434783	0.0754717	FB2	['GO:0009887', 'GO:0048729', 'GO:0060485']	['HEY2', 'ROBO2', 'SNAI2', 'WNT5A']
507	GO:BP	GO:0014070	response to organic cyclic compound	0.292098	FALSE	"Any process that results in a change in state or activity of a cell or an organism (in terms of movement, secretion, enzyme production, gene expression, etc.) as a result of an organic cyclic compound stimulus." [GOC:ef]	1004	92	15	18123	0.163043	0.0149402	FB2	['GO:0010033']	['ALPL', 'CCND1', 'COL1A1', 'EDNRB', 'ID3', 'INHBA', 'LUM', 'MDK', 'MEF2C', 'NPM1', 'POSTN', 'PTCH1', 'SNAI2', 'SPARC', 'UGT3A2']
508	GO:BP	GO:0060157	urinary bladder development	0.292187	FALSE	"The process whose specific outcome is the progression of the urinary bladder over time, from its formation to the mature structure. The urinary bladder is an elastic, muscular sac situated in the anterior part of the pelvic cavity in which urine collects before excretion." [GOC:dph, GOC:ln, GOC:mr, PMID:11768524, PMID:18276178, PMID:538956]	4	92	2	18123	0.0217391	0.5	FB2	['GO:0048513', 'GO:0072001']	['RBP4', 'WNT5A']
509	GO:BP	GO:0048145	regulation of fibroblast proliferation	0.303072	FALSE	"Any process that modulates the frequency, rate or extent of multiplication or reproduction of fibroblast cells." [GOC:jid]	87	168	6	18123	0.0357143	0.0689655	FB1	['GO:0042127', 'GO:0048144']	['FBLN1', 'FTH1', 'NUPR1', 'PDGFD', 'PDGFRB', 'S100A6']
510	GO:BP	GO:1902230	negative regulation of intrinsic apoptotic signaling pathway in response to DNA damage	0.311084	FALSE	"Any process that stops, prevents or reduces the frequency, rate or extent of intrinsic apoptotic signaling pathway in response to DNA damage." [GOC:BHF, GOC:mtg_apoptosis, GOC:rl, GOC:TermGenie, PMID:15314165]	30	168	4	18123	0.0238095	0.133333	FB1	['GO:0008630', 'GO:1902229', 'GO:2001021', 'GO:2001243']	['ACKR3', 'CLU', 'CXCL12', 'SFRP2']
511	GO:BP	GO:2001214	positive regulation of vasculogenesis	0.311311	FALSE	"Any process that activates or increases the frequency, rate or extent of vasculogenesis." [GOC:obol]	12	168	3	18123	0.0178571	0.25	FB1	['GO:0001570', 'GO:0045597', 'GO:2001212']	['ADM', 'CD34', 'RAMP2']
512	GO:BP	GO:0044273	sulfur compound catabolic process	0.311477	FALSE	"The chemical reactions and pathways resulting in the breakdown of compounds that contain sulfur, such as the amino acids methionine and cysteine or the tripeptide glutathione." [GOC:jl]	54	92	4	18123	0.0434783	0.0740741	FB2	['GO:0006790', 'GO:0044248']	['BGN', 'DPEP1', 'LUM', 'VCAN']
513	GO:BP	GO:0009611	response to wounding	0.316047	FALSE	"Any process that results in a change in state or activity of a cell or an organism (in terms of movement, secretion, enzyme production, gene expression, etc.) as a result of a stimulus indicating damage to the organism." [GOC:go_curators]	680	92	12	18123	0.130435	0.0176471	FB2	['GO:0006950']	['ADAMTS18', 'COL1A1', 'COL1A2', 'COL3A1', 'F2R', 'F2RL2', 'ID3', 'MDK', 'POSTN', 'SERPINE2', 'SPARC', 'WNT5A']
514	GO:BP	GO:0001837	epithelial to mesenchymal transition	0.316093	FALSE	"A transition where an epithelial cell loses apical/basolateral polarity, severs intercellular adhesive junctions, degrades basement membrane components and becomes a migratory mesenchymal cell." [GOC:dph, PMID:14701881]	160	92	6	18123	0.0652174	0.0375	FB2	['GO:0048762']	['COL1A1', 'HEY2', 'MDK', 'SNAI2', 'WNT5A', 'WWTR1']
515	GO:BP	GO:0001666	response to hypoxia	0.318225	FALSE	"Any process that results in a change in state or activity of a cell or an organism (in terms of movement, secretion, enzyme production, gene expression, etc.) as a result of a stimulus indicating lowered oxygen tension. Hypoxia, defined as a decline in O2 levels below normoxic levels of 20.8 - 20.95%, results in metabolic adaptation at both the cellular and organismal level." [GOC:hjd]	367	168	12	18123	0.0714286	0.0326975	FB1	['GO:0006950', 'GO:0036293']	['ADM', 'CD34', 'CXCL12', 'MMP2', 'NDRG1', 'PAM', 'PTGIS', 'RAMP2', 'RBPJ', 'SOD3', 'TGFBR3', 'VASN']
516	GO:BP	GO:0048144	fibroblast proliferation	0.32278	FALSE	"The multiplication or reproduction of fibroblast cells, resulting in the expansion of the fibroblast population." [GOC:jid]	88	168	6	18123	0.0357143	0.0681818	FB1	['GO:0008283']	['FBLN1', 'FTH1', 'NUPR1', 'PDGFD', 'PDGFRB', 'S100A6']
517	GO:BP	GO:0007566	embryo implantation	0.323326	FALSE	"Attachment of the blastocyst to the uterine lining." [GOC:isa_complete, http://www.medterms.com]	56	168	5	18123	0.0297619	0.0892857	FB1	['GO:0007275', 'GO:0007565', 'GO:0022414']	['FBLN1', 'IGFBP7', 'MMP2', 'TIMP1', 'TPPP3']
518	GO:BP	GO:0030030	cell projection organization	0.326321	FALSE	"A process that is carried out at the cellular level which results in the assembly, arrangement of constituent parts, or disassembly of a prolongation or process extending from a cell, e.g. a flagellum or axon." [GOC:jl, GOC:mah, http://www.cogsci.princeton.edu/~wn/]	1636	92	20	18123	0.217391	0.0122249	FB2	['GO:0016043']	['CDH11', 'ENPP2', 'FSCN1', 'HES1', 'MDK', 'MEF2C', 'NOTCH3', 'PALLD', 'PLK2', 'POSTN', 'PTCH1', 'RAB13', 'RAB34', 'ROBO2', 'STMN1', 'STMN2', 'TNN', 'VIM', 'WNT5A', 'WWTR1']
519	GO:BP	GO:0048742	regulation of skeletal muscle fiber development	0.329579	FALSE	"Any process that modulates the frequency, rate or extent of skeletal muscle fiber development. Muscle fibers are formed by the maturation of myotubes. They can be classed as slow, intermediate/fast or fast." [GOC:dph, GOC:jid, GOC:mtg_muscle, GOC:sm]	13	155	3	18123	0.0193548	0.230769	FB3	['GO:0010830', 'GO:0048741', 'GO:0060284']	['MYF5', 'MYF6', 'NACA']
520	GO:BP	GO:0001558	regulation of cell growth	0.336251	FALSE	"Any process that modulates the frequency, rate, extent or direction of cell growth." [GOC:go_curators]	426	168	13	18123	0.077381	0.0305164	FB1	['GO:0016049', 'GO:0040008', 'GO:0051128']	['CXCL12', 'DBN1', 'FBLN5', 'IGFBP5', 'IGFBP7', 'LRP1', 'LTBP4', 'PI16', 'SDCBP', 'SEMA3C', 'SFRP2', 'SLIT3', 'SPOCK1']
521	GO:BP	GO:0060840	artery development	0.343703	FALSE	"The progression of the artery over time, from its initial formation to the mature structure. An artery is a blood vessel that carries blood away from the heart to a capillary bed." [GOC:dph, GOC:sdb_2009, GOC:tb]	103	92	5	18123	0.0543478	0.0485437	FB2	['GO:0001568']	['HES1', 'HEY2', 'MDK', 'ROBO2', 'SOX4']
522	GO:BP	GO:0071353	cellular response to interleukin-4	0.347223	FALSE	"Any process that results in a change in state or activity of a cell (in terms of movement, secretion, enzyme production, gene expression, etc.) as a result of an interleukin-4 stimulus." [GOC:mah]	33	155	4	18123	0.0258065	0.121212	FB3	['GO:0070670', 'GO:0071345']	['HSP90AB1', 'IMPDH2', 'RPL3', 'RPLP0']
523	GO:BP	GO:0060343	trabecula formation	0.349602	FALSE	"The process of creating a trabecula in an organ. A trabecula is a small, often microscopic, tissue element in the form of a small beam, strut or rod, which generally has a mechanical function. Trabecula are usually but not necessarily, composed of dense collagenous tissue." [GOC:dph]	22	92	3	18123	0.0326087	0.136364	FB2	['GO:0009887', 'GO:0048646', 'GO:0061383']	['COL1A1', 'HEY2', 'RBP4']
524	GO:BP	GO:0006690	icosanoid metabolic process	0.351043	FALSE	"The chemical reactions and pathways involving icosanoids, any of a group of C20 polyunsaturated fatty acids." [GOC:ma]	127	168	7	18123	0.0416667	0.0551181	FB1	['GO:0019752']	['AKR1C1', 'AKR1C2', 'AKR1C3', 'EPHX1', 'GPX4', 'PTGES', 'PTGIS']
525	GO:BP	GO:0021879	forebrain neuron differentiation	0.358957	FALSE	"The process in which a relatively unspecialized cell acquires specialized features of a neuron that will reside in the forebrain." [GO_REF:0000021, GOC:cls, GOC:dgh, GOC:dph, GOC:jid, PMID:16226447]	56	92	4	18123	0.0434783	0.0714286	FB2	['GO:0021872', 'GO:0021953']	['HES1', 'INHBA', 'ROBO2', 'WNT5A']
526	GO:BP	GO:0071772	response to BMP	0.36418	FALSE	"Any process that results in a change in state or activity of a cell or an organism (in terms of movement, secretion, enzyme production, gene expression, etc.) as a result of a bone morphogenetic protein (BMP) stimulus." [GOC:mah, GOC:yaf]	170	168	8	18123	0.047619	0.0470588	FB1	['GO:0009719', 'GO:0070848']	['CHRDL1', 'FBN1', 'FSTL1', 'NBL1', 'RBPJ', 'SFRP2', 'SFRP4', 'TGFBR3']
527	GO:BP	GO:0071773	cellular response to BMP stimulus	0.36418	FALSE	"Any process that results in a change in state or activity of a cell (in terms of movement, secretion, enzyme production, gene expression, etc.) as a result of a bone morphogenetic protein (BMP) stimulus." [GOC:mah, GOC:yaf]	170	168	8	18123	0.047619	0.0470588	FB1	['GO:0071363', 'GO:0071495', 'GO:0071772']	['CHRDL1', 'FBN1', 'FSTL1', 'NBL1', 'RBPJ', 'SFRP2', 'SFRP4', 'TGFBR3']
528	GO:BP	GO:0007178	transmembrane receptor protein serine/threonine kinase signaling pathway	0.378878	FALSE	"A series of molecular signals initiated by the binding of an extracellular ligand to a receptor on the surface of the target cell where the receptor possesses serine/threonine kinase activity, and ending with regulation of a downstream cellular process, e.g. transcription." [GOC:mah, GOC:signaling]	374	168	12	18123	0.0714286	0.0320856	FB1	['GO:0007167']	['CHRDL1', 'FBN1', 'FSTL1', 'LTBP2', 'LTBP4', 'NBL1', 'RBPJ', 'SDCBP', 'SFRP2', 'SFRP4', 'TGFBR3', 'VASN']
529	GO:BP	GO:2000146	negative regulation of cell motility	0.397922	FALSE	"Any process that stops, prevents, or reduces the frequency, rate or extent of cell motility." [GOC:mah]	376	168	12	18123	0.0714286	0.0319149	FB1	['GO:0040013', 'GO:0048870', 'GO:0051271', 'GO:2000145']	['APOD', 'CXCL12', 'DCN', 'FBLN1', 'IGFBP5', 'ITGB1BP1', 'LRP1', 'NBL1', 'PODN', 'SERPINF1', 'SFRP2', 'TIMP1']
530	GO:BP	GO:0003283	atrial septum development	0.400567	FALSE	"The progression of the atrial septum over time, from its initial formation to the mature structure." [GOC:mtg_heart]	23	92	3	18123	0.0326087	0.130435	FB2	['GO:0003230', 'GO:0003279']	['HEY2', 'SOX4', 'WNT5A']
531	GO:BP	GO:0061005	cell differentiation involved in kidney development	0.411449	FALSE	"The process in which relatively unspecialized cells acquire specialized structural and/or functional features that characterize the cells of the kidney as it progresses from its formation to the mature state." [GOC:mtg_kidney_jan10]	58	92	4	18123	0.0434783	0.0689655	FB2	['GO:0001822', 'GO:0030154']	['HES1', 'MEF2C', 'PTCH1', 'WWTR1']
532	GO:BP	GO:0048523	negative regulation of cellular process	0.411999	FALSE	"Any process that stops, prevents, or reduces the frequency, rate or extent of a cellular process, any of those that are carried out at the cellular level, but are not necessarily restricted to a single cell. For example, cell communication occurs among more than one cell, but occurs at the cellular level." [GOC:jid]	5153	155	65	18123	0.419355	0.012614	FB3	['GO:0009987', 'GO:0048519', 'GO:0050794']	['ANGPTL4', 'APOC1', 'APOE', 'ATF3', 'BMP4', 'BST2', 'BTG1', 'BTG2', 'CCL2', 'CDKN1C', 'CIRBP', 'CLDN5', 'COL18A1', 'DAG1', 'DDIT4', 'DLK1', 'EGR1', 'EIF4A2', 'FABP5', 'FOSB', 'FRZB', 'GADD45B', 'GAPDH', 'GPM6B', 'GREM1', 'HES1', 'HEY1', 'HLA-E', 'HSP90AB1', 'JSRP1', 'JUN', 'KLF10', 'MIDN', 'MIR24-2', 'MSC', 'MYC', 'MYF6', 'NACA', 'NDRG2', 'NOTCH3', 'NPM1', 'NPPC', 'PAX7', 'PDK4', 'PEG10', 'PITX2…
533	GO:BP	GO:1901722	regulation of cell proliferation involved in kidney development	0.416835	FALSE	"Any process that modulates the frequency, rate or extent of cell proliferation involved in kidney development." [GOC:TermGenie, PMID:18182616]	14	155	3	18123	0.0193548	0.214286	FB3	['GO:0042127', 'GO:0072111']	['BMP4', 'EGR1', 'MYC']
534	GO:BP	GO:0006952	defense response	0.422662	FALSE	"Reactions, triggered in response to the presence of a foreign body or the occurrence of an injury, which result in restriction of damage to the organism attacked or prevention/recovery from the infection caused by the attack." [GOC:go_curators]	1956	168	34	18123	0.202381	0.0173824	FB1	['GO:0006950']	['ABI3BP', 'ADM', 'APOD', 'AXL', 'C1R', 'C1S', 'C3', 'CD55', 'CD81', 'CFD', 'CFH', 'CLU', 'CST3', 'CXCL12', 'ECM1', 'GPX4', 'GSN', 'HSPG2', 'IL6ST', 'LGALS3', 'MFAP4', 'NT5E', 'NUPR1', 'PTGES', 'PTGIS', 'RAMP2', 'RBPJ', 'SERPINF1', 'SERPING1', 'SLPI', 'SSC5D', 'TIMP1', 'TMSB4X', 'TNFAIP6']
535	GO:BP	GO:0051173	positive regulation of nitrogen compound metabolic process	0.423628	FALSE	"Any process that activates or increases the frequency, rate or extent of the chemical reactions and pathways involving nitrogen or nitrogenous compounds." [GOC:ai, GOC:tb]	3143	155	45	18123	0.290323	0.0143175	FB3	['GO:0006807', 'GO:0009893', 'GO:0051171']	['ADIRF', 'APOE', 'ATF3', 'BMP4', 'BTG2', 'CDKN1C', 'CHCHD10', 'CIRBP', 'CSRNP1', 'CXCR4', 'DAG1', 'EEF2', 'EGR1', 'FGFR4', 'FOS', 'FOSB', 'GADD45B', 'GREM1', 'HES1', 'HEY1', 'HSP90AB1', 'JUN', 'JUNB', 'KLF10', 'MAFF', 'MYC', 'MYF5', 'MYF6', 'NACA', 'NOTCH3', 'NPM1', 'PITX2', 'RPL26', 'RPL5', 'RPS2', 'RPS27A', 'RPS3', 'RPS4X', 'RPS9', 'RXRG', 'SERTAD1', 'SIRT2', 'SOCS3', 'TPD52L1', 'ZFP36']
536	GO:BP	GO:0045471	response to ethanol	0.424135	FALSE	"Any process that results in a change in state or activity of a cell or an organism (in terms of movement, secretion, enzyme production, gene expression, etc.) as a result of an ethanol stimulus." [GOC:go_curators]	141	155	7	18123	0.0451613	0.0496454	FB3	['GO:0097305']	['CA3', 'CLDN5', 'EEF2', 'MYC', 'NPPC', 'RPL10A', 'RPL15']
537	GO:BP	GO:0035993	deltoid tuberosity development	0.433627	FALSE	"The process whose specific outcome is the progression of the deltoid tuberosity over time, from its formation to the mature structure. The deltoid tuberosity is the region on the shaft of the humerus to which the deltoid muscle attaches. The deltoid tuberosity develops through endochondral ossification in a two-phase process; an initiating tendon-dependent phase, and a muscle-dependent growth ph…	3	155	2	18123	0.0129032	0.666667	FB3	['GO:0048856', 'GO:0060173', 'GO:0060348']	['BMP4', 'PITX2']
538	GO:BP	GO:0035904	aorta development	0.439669	FALSE	"The progression of the aorta over time, from its initial formation to the mature structure. An aorta is an artery that carries blood from the heart to other parts of the body." [GOC:bf, GOC:dgh, MA:0000062, UBERON:0000947, Wikipedia:Aorta]	59	92	4	18123	0.0434783	0.0677966	FB2	['GO:0060840']	['HES1', 'HEY2', 'ROBO2', 'SOX4']
539	GO:BP	GO:0031325	positive regulation of cellular metabolic process	0.443226	FALSE	"Any process that activates or increases the frequency, rate or extent of the chemical reactions and pathways by which individual cells transform chemical substances." [GOC:mah]	3342	155	47	18123	0.303226	0.0140634	FB3	['GO:0009893', 'GO:0031323', 'GO:0044237', 'GO:0048522']	['ADIRF', 'APOC1', 'APOE', 'ATF3', 'BMP4', 'BTG2', 'CDKN1C', 'CHCHD10', 'CIRBP', 'CSRNP1', 'CXCR4', 'DAG1', 'EEF2', 'EGR1', 'FGFR4', 'FOS', 'FOSB', 'GADD45B', 'GREM1', 'HES1', 'HEY1', 'HSP90AB1', 'JUN', 'JUNB', 'KLF10', 'MAFF', 'MIR24-2', 'MYC', 'MYF5', 'MYF6', 'NACA', 'NOTCH3', 'NPM1', 'PITX2', 'RPL26', 'RPL5', 'RPS2', 'RPS27A', 'RPS3', 'RPS4X', 'RPS9', 'RXRG', 'SERTAD1', 'SIRT2', 'SOCS3', 'TPD5…
540	GO:BP	GO:0060322	head development	0.454014	FALSE	"The biological process whose specific outcome is the progression of a head from an initial condition to its mature state. The head is the anterior-most division of the body." [GOC:dph]	816	92	13	18123	0.141304	0.0159314	FB2	['GO:0048856']	['COL1A1', 'COL3A1', 'COL4A1', 'EDNRA', 'HES1', 'IL11RA', 'INHBA', 'MDK', 'PTCH1', 'ROBO2', 'SERPINE2', 'STMN1', 'WNT5A']
541	GO:BP	GO:0034505	tooth mineralization	0.456111	FALSE	"The process in which calcium salts are deposited into calcareous tooth structures such as dental enamel, dentin and cementum." [GOC:mah, MP:0002817, MSH:D014074]	24	92	3	18123	0.0326087	0.125	FB2	['GO:0031214', 'GO:0042476']	['ALPL', 'ASPN', 'COL1A1']
542	GO:BP	GO:0036293	response to decreased oxygen levels	0.460037	FALSE	"Any process that results in a change in state or activity of a cell or an organism (in terms of movement, secretion, enzyme production, gene expression, etc.) as a result of a stimulus reflecting a decline in the level of oxygen." [GOC:al]	382	168	12	18123	0.0714286	0.0314136	FB1	['GO:0070482']	['ADM', 'CD34', 'CXCL12', 'MMP2', 'NDRG1', 'PAM', 'PTGIS', 'RAMP2', 'RBPJ', 'SOD3', 'TGFBR3', 'VASN']
543	GO:BP	GO:0006959	humoral immune response	0.471153	FALSE	"An immune response mediated through a body fluid." [GOC:hb, ISBN:0198506732]	383	168	12	18123	0.0714286	0.0313316	FB1	['GO:0006955']	['C1R', 'C1S', 'C3', 'CD55', 'CD81', 'CFD', 'CFH', 'CLU', 'MFAP4', 'RBPJ', 'SERPING1', 'SLPI']
544	GO:BP	GO:0051172	negative regulation of nitrogen compound metabolic process	0.473116	FALSE	"Any process that stops, prevents, or reduces the frequency, rate or extent of the chemical reactions and pathways involving nitrogen or nitrogenous compounds." [GOC:ai, GOC:tb]	2592	155	39	18123	0.251613	0.0150463	FB3	['GO:0006807', 'GO:0009892', 'GO:0051171']	['APOC1', 'APOE', 'ATF3', 'BMP4', 'BST2', 'BTG2', 'CDKN1C', 'CIRBP', 'DDIT4', 'EGR1', 'EIF4A2', 'FOSB', 'GADD45B', 'GAPDH', 'GREM1', 'HES1', 'HEY1', 'HSP90AB1', 'JUN', 'KLF10', 'MIR24-2', 'MSC', 'MYC', 'MYF6', 'NACA', 'NPM1', 'NPPC', 'PITX2', 'PPP1R14B', 'RPL10', 'RPL5', 'RPS27A', 'RPS3', 'RTN2', 'SERPINB1', 'SIRT2', 'SOCS3', 'TGIF1', 'ZFP36']
545	GO:BP	GO:0000302	response to reactive oxygen species	0.476647	FALSE	"Any process that results in a change in state or activity of a cell or an organism (in terms of movement, secretion, enzyme production, gene expression, etc.) as a result of a reactive oxygen species stimulus. Reactive oxygen species include singlet oxygen, superoxide, and oxygen free radicals." [GOC:krc]	224	168	9	18123	0.0535714	0.0401786	FB1	['GO:0006979', 'GO:1901700']	['AKR1C3', 'APOD', 'AXL', 'FBLN5', 'MMP2', 'PDGFD', 'PDGFRB', 'SOD3', 'TXNIP']
546	GO:BP	GO:0045936	negative regulation of phosphate metabolic process	0.48093	FALSE	"Any process that stops, prevents, or reduces the frequency, rate or extent of the chemical reactions and pathways involving phosphates." [GOC:go_curators]	543	155	14	18123	0.0903226	0.0257827	FB3	['GO:0006796', 'GO:0010563', 'GO:0019220']	['APOC1', 'APOE', 'BMP4', 'CDKN1C', 'DDIT4', 'GADD45B', 'GREM1', 'MIDN', 'MIR24-2', 'NPM1', 'PPP1R14B', 'SIRT2', 'SOCS3', 'SYTL2']
547	GO:BP	GO:0019369	arachidonic acid metabolic process	0.48514	FALSE	"The chemical reactions and pathways involving arachidonic acid, a straight chain fatty acid with 20 carbon atoms and four double bonds per molecule. Arachidonic acid is the all-Z-(5,8,11,14)-isomer." [ISBN:0198506732]	61	168	5	18123	0.0297619	0.0819672	FB1	['GO:0001676', 'GO:0006690', 'GO:0033559', 'GO:0120254']	['AKR1C3', 'EPHX1', 'GPX4', 'PTGES', 'PTGIS']
548	GO:BP	GO:0002920	regulation of humoral immune response	0.488511	FALSE	"Any process that modulates the frequency, rate, or extent of a humoral immune response." [GOC:add]	134	168	7	18123	0.0416667	0.0522388	FB1	['GO:0006959', 'GO:0050776']	['C1S', 'C3', 'CD55', 'CD81', 'CFH', 'CLU', 'SERPING1']
549	GO:BP	GO:1902174	positive regulation of keratinocyte apoptotic process	0.489832	FALSE	"Any process that activates or increases the frequency, rate or extent of keratinocyte apoptotic process." [GOC:BHF, GOC:mtg_apoptosis, GOC:rl, GOC:TermGenie, PMID:18938133]	3	168	2	18123	0.0119048	0.666667	FB1	['GO:0097283', 'GO:1902172', 'GO:1904037']	['GSN', 'SFRP4']
550	GO:BP	GO:0006982	response to lipid hydroperoxide	0.489832	FALSE	"Any process that results in a change in state or activity of a cell or an organism (in terms of movement, secretion, enzyme production, gene expression, etc.) as a result of a lipid hydroperoxide stimulus. Lipid hydroperoxide is the highly reactive primary oxygenated products of polyunsaturated fatty acids." [GOC:jl, PMID:10944149]	3	168	2	18123	0.0119048	0.666667	FB1	['GO:0033194', 'GO:0033993']	['GPX3', 'MGST1']
551	GO:BP	GO:0019747	regulation of isoprenoid metabolic process	0.489832	FALSE	"Any process that modulates the frequency, rate or extent of the chemical reactions and pathways involving isoprenoids." [GOC:go_curators]	3	168	2	18123	0.0119048	0.666667	FB1	['GO:0006720', 'GO:0019216', 'GO:0031323']	['AKR1C3', 'NPC2']
552	GO:BP	GO:0070670	response to interleukin-4	0.489974	FALSE	"Any process that results in a change in state or activity of a cell or an organism (in terms of movement, secretion, enzyme production, gene expression, etc.) as a result of an interleukin-4 stimulus." [GOC:mah]	36	155	4	18123	0.0258065	0.111111	FB3	['GO:0034097']	['HSP90AB1', 'IMPDH2', 'RPL3', 'RPLP0']
553	GO:BP	GO:0010563	negative regulation of phosphorus metabolic process	0.49003	FALSE	"Any process that decreases the frequency, rate or extent of the chemical reactions and pathways involving phosphorus or compounds containing phosphorus." [GOC:dph, GOC:tb]	544	155	14	18123	0.0903226	0.0257353	FB3	['GO:0006793', 'GO:0031324', 'GO:0051174']	['APOC1', 'APOE', 'BMP4', 'CDKN1C', 'DDIT4', 'GADD45B', 'GREM1', 'MIDN', 'MIR24-2', 'NPM1', 'PPP1R14B', 'SIRT2', 'SOCS3', 'SYTL2']
554	GO:BP	GO:0031324	negative regulation of cellular metabolic process	0.498181	FALSE	"Any process that stops, prevents, or reduces the frequency, rate or extent of the chemical reactions and pathways by which individual cells transform chemical substances." [GOC:mah]	2785	155	41	18123	0.264516	0.0147217	FB3	['GO:0009892', 'GO:0031323', 'GO:0044237', 'GO:0048523']	['APOC1', 'APOE', 'ATF3', 'BMP4', 'BST2', 'BTG2', 'CDKN1C', 'CIRBP', 'DDIT4', 'EGR1', 'EIF4A2', 'FOSB', 'GADD45B', 'GAPDH', 'GREM1', 'HES1', 'HEY1', 'HSP90AB1', 'JUN', 'KLF10', 'MIDN', 'MIR24-2', 'MSC', 'MYC', 'MYF6', 'NACA', 'NPM1', 'NPPC', 'PITX2', 'PPP1R14B', 'RPL10', 'RPL5', 'RPS27A', 'RPS3', 'RTN2', 'SERPINB1', 'SIRT2', 'SOCS3', 'SYTL2', 'TGIF1', 'ZFP36']
555	GO:BP	GO:0006027	glycosaminoglycan catabolic process	0.500248	FALSE	"The chemical reactions and pathways resulting in the breakdown of glycosaminoglycans, any one of a group of polysaccharides that contain amino sugars." [ISBN:0192800981]	61	92	4	18123	0.0434783	0.0655738	FB2	['GO:0006026', 'GO:0030203']	['BGN', 'GPC3', 'LUM', 'VCAN']
556	GO:BP	GO:0045893	positive regulation of transcription, DNA-templated	0.511341	FALSE	"Any process that activates or increases the frequency, rate or extent of cellular DNA-templated transcription." [GOC:go_curators, GOC:txnOH]	1623	155	28	18123	0.180645	0.017252	FB3	['GO:0006351', 'GO:0006355', 'GO:1903508']	['ADIRF', 'APOE', 'ATF3', 'BMP4', 'CDKN1C', 'CHCHD10', 'CSRNP1', 'EGR1', 'FOS', 'FOSB', 'GREM1', 'HES1', 'HEY1', 'JUN', 'JUNB', 'KLF10', 'MAFF', 'MYC', 'MYF5', 'MYF6', 'NACA', 'NOTCH3', 'NPM1', 'PITX2', 'RPS27A', 'RXRG', 'SERTAD1', 'SIRT2']
557	GO:BP	GO:1903508	positive regulation of nucleic acid-templated transcription	0.511341	FALSE	"Any process that activates or increases the frequency, rate or extent of nucleic acid-templated transcription." [GO_REF:0000058, GOC:pr, GOC:TermGenie, GOC:txnOH, GOC:vw]	1623	155	28	18123	0.180645	0.017252	FB3	['GO:0097659', 'GO:1902680', 'GO:1903506']	['ADIRF', 'APOE', 'ATF3', 'BMP4', 'CDKN1C', 'CHCHD10', 'CSRNP1', 'EGR1', 'FOS', 'FOSB', 'GREM1', 'HES1', 'HEY1', 'JUN', 'JUNB', 'KLF10', 'MAFF', 'MYC', 'MYF5', 'MYF6', 'NACA', 'NOTCH3', 'NPM1', 'PITX2', 'RPS27A', 'RXRG', 'SERTAD1', 'SIRT2']
558	GO:BP	GO:1902680	positive regulation of RNA biosynthetic process	0.516549	FALSE	"Any process that activates or increases the frequency, rate or extent of RNA biosynthetic process." [GO:jl, GO_REF:0000058, GOC:TermGenie]	1624	155	28	18123	0.180645	0.0172414	FB3	['GO:0010557', 'GO:0031328', 'GO:0032774', 'GO:0051254', 'GO:2001141']	['ADIRF', 'APOE', 'ATF3', 'BMP4', 'CDKN1C', 'CHCHD10', 'CSRNP1', 'EGR1', 'FOS', 'FOSB', 'GREM1', 'HES1', 'HEY1', 'JUN', 'JUNB', 'KLF10', 'MAFF', 'MYC', 'MYF5', 'MYF6', 'NACA', 'NOTCH3', 'NPM1', 'PITX2', 'RPS27A', 'RXRG', 'SERTAD1', 'SIRT2']
559	GO:BP	GO:0010646	regulation of cell communication	0.520931	FALSE	"Any process that modulates the frequency, rate or extent of cell communication. Cell communication is the process that mediates interactions between a cell and its surroundings. Encompasses interactions such as signaling or attachment between one cell and another cell, between a cell and an extracellular matrix, or between a cell and any other aspect of its environment." [GOC:dph, GOC:tb]	3634	168	53	18123	0.315476	0.0145845	FB1	['GO:0007154', 'GO:0050794']	['ACKR3', 'ADM', 'AKAP12', 'AKR1C2', 'AKR1C3', 'ANK2', 'APOD', 'AXL', 'C3', 'CD55', 'CD81', 'CHRDL1', 'CLU', 'CTHRC1', 'CXCL12', 'DBN1', 'DCN', 'ECM1', 'FBLN1', 'FBN1', 'FSTL1', 'GAS1', 'GPNMB', 'IGFBP5', 'IGFBP6', 'IGFBP7', 'IL6ST', 'ITGB1BP1', 'LEPROT', 'LGALS3', 'LRP1', 'LTBP4', 'LY6E', 'NBL1', 'NUPR1', 'PDGFD', 'PDGFRB', 'PTGIS', 'RAMP2', 'RBPJ', 'S100A13', 'SDCBP', 'SFRP2', 'SFRP4', 'SLIT3',…
560	GO:BP	GO:0044706	multi-multicellular organism process	0.525906	FALSE	"A multicellular organism process which involves another multicellular organism of the same or different species." [GOC:jl]	227	168	9	18123	0.0535714	0.0396476	FB1	['GO:0032501', 'GO:0051704']	['ADM', 'FBLN1', 'IGFBP5', 'IGFBP7', 'MMP2', 'PAM', 'RAMP2', 'TIMP1', 'TPPP3']
561	GO:BP	GO:0043170	macromolecule metabolic process	0.527838	FALSE	"The chemical reactions and pathways involving macromolecules, any molecule of high relative molecular mass, the structure of which essentially comprises the multiple repetition of units derived, actually or conceptually, from molecules of low relative molecular mass." [GOC:mah]	9867	155	106	18123	0.683871	0.0107429	FB3	['GO:0071704']	['ADIRF', 'APOC1', 'APOE', 'ATF3', 'BMP4', 'BST2', 'BTG1', 'BTG2', 'CCL2', 'CDKN1C', 'CHCHD10', 'CIRBP', 'CLDN5', 'CSRNP1', 'CXCR4', 'DAG1', 'DDIT4', 'EEF2', 'EGR1', 'EIF3L', 'EIF4A2', 'FBL', 'FGFR4', 'FOS', 'FOSB', 'GADD45B', 'GAPDH', 'GREM1', 'HES1', 'HEY1', 'HLA-E', 'HSP90AB1', 'IL32', 'JUN', 'JUNB', 'KLF10', 'KLHL41', 'MAFF', 'MIR24-2', 'MSC', 'MYC', 'MYF5', 'MYF6', 'NACA', 'NDRG2', 'NOTCH3',…
562	GO:BP	GO:0010648	negative regulation of cell communication	0.52958	FALSE	"Any process that decreases the frequency, rate or extent of cell communication. Cell communication is the process that mediates interactions between a cell and its surroundings. Encompasses interactions such as signaling or attachment between one cell and another cell, between a cell and an extracellular matrix, or between a cell and any other aspect of its environment." [GOC:dph, GOC:tb]	1499	168	28	18123	0.166667	0.0186791	FB1	['GO:0007154', 'GO:0010646', 'GO:0048523']	['ACKR3', 'ADM', 'APOD', 'CHRDL1', 'CLU', 'CTHRC1', 'CXCL12', 'DCN', 'ECM1', 'FBLN1', 'FBN1', 'FSTL1', 'IGFBP5', 'IGFBP6', 'IL6ST', 'ITGB1BP1', 'LEPROT', 'LGALS3', 'LRP1', 'NBL1', 'SFRP2', 'SFRP4', 'SLIT3', 'TGFBR3', 'TIMP2', 'TIMP3', 'TMSB4X', 'VASN']
563	GO:BP	GO:0048869	cellular developmental process	0.533544	FALSE	"A biological process whose specific outcome is the progression of a cell over time from an initial condition to a later condition." [GOC:isa_complete]	4468	155	58	18123	0.374194	0.0129812	FB3	['GO:0009987', 'GO:0032502']	['ADIRF', 'APOE', 'ATF3', 'BMP4', 'BTG1', 'BTG2', 'CCL2', 'CDH15', 'CHODL', 'CLDN5', 'CNN3', 'COL18A1', 'CXCR4', 'DAG1', 'DDIT4', 'DLK1', 'EEF2', 'EGR1', 'FBL', 'FOS', 'FRZB', 'GADD45B', 'GPM6B', 'GREM1', 'HES1', 'HEY1', 'HSP90AB1', 'JUN', 'JUNB', 'KLF10', 'KLHL41', 'MAFF', 'MAL', 'MIR24-2', 'MYC', 'MYF5', 'MYF6', 'NACA', 'NDRG2', 'NOTCH3', 'NPM1', 'NPPC', 'PEG10', 'PITX2', 'RPL24', 'RPS19', 'RPS…
564	GO:BP	GO:0006882	cellular zinc ion homeostasis	0.54573	FALSE	"Any process involved in the maintenance of an internal steady state of zinc ions at the level of a cell." [GOC:ai, GOC:mah]	37	155	4	18123	0.0258065	0.108108	FB3	['GO:0046916', 'GO:0055069', 'GO:0072503']	['MT1E', 'MT1M', 'MT1X', 'MT2A']
565	GO:BP	GO:0023057	negative regulation of signaling	0.547159	FALSE	"Any process that stops, prevents, or reduces the frequency, rate or extent of a signaling process." [GOC:mtg_signal]	1502	168	28	18123	0.166667	0.0186418	FB1	['GO:0023051', 'GO:0023052', 'GO:0048519']	['ACKR3', 'ADM', 'APOD', 'CHRDL1', 'CLU', 'CTHRC1', 'CXCL12', 'DCN', 'ECM1', 'FBLN1', 'FBN1', 'FSTL1', 'IGFBP5', 'IGFBP6', 'IL6ST', 'ITGB1BP1', 'LEPROT', 'LGALS3', 'LRP1', 'NBL1', 'SFRP2', 'SFRP4', 'SLIT3', 'TGFBR3', 'TIMP2', 'TIMP3', 'TMSB4X', 'VASN']
566	GO:BP	GO:0031328	positive regulation of cellular biosynthetic process	0.554501	FALSE	"Any process that activates or increases the frequency, rate or extent of the chemical reactions and pathways resulting in the formation of substances, carried out by individual cells." [GOC:mah]	1976	92	22	18123	0.23913	0.0111336	FB2	['GO:0009891', 'GO:0031325', 'GO:0031326', 'GO:0044249']	['COL1A1', 'CREB3L1', 'F2R', 'HES1', 'HEY2', 'HMGN1', 'HNRNPA1', 'INHBA', 'KRT17', 'LMO4', 'LUM', 'MAGED1', 'MDK', 'MEF2C', 'NOTCH3', 'NPM1', 'PABPC1', 'PTCH1', 'SOX4', 'VIM', 'WNT5A', 'WWTR1']
567	GO:BP	GO:0008202	steroid metabolic process	0.561156	FALSE	"The chemical reactions and pathways involving steroids, compounds with a 1,2,cyclopentanoperhydrophenanthrene nucleus." [ISBN:0198547684]	334	168	11	18123	0.0654762	0.0329341	FB1	['GO:0006629', 'GO:1901360']	['ADM', 'AKR1C1', 'AKR1C2', 'AKR1C3', 'CYB5R3', 'HSD3B7', 'IGFBP7', 'LEPR', 'LIMA1', 'NPC2', 'YWHAH']
568	GO:BP	GO:0007584	response to nutrient	0.562575	FALSE	"Any process that results in a change in state or activity of a cell or an organism (in terms of movement, secretion, enzyme production, gene expression, etc.) as a result of a nutrient stimulus." [GOC:go_curators]	178	92	6	18123	0.0652174	0.0337079	FB2	['GO:0031667', 'GO:0042221']	['ALPL', 'CCND1', 'COL1A1', 'POSTN', 'SNAI2', 'SPARC']
569	GO:BP	GO:0050789	regulation of biological process	0.569859	FALSE	"Any process that modulates the frequency, rate or extent of a biological process. Biological processes are regulated by many means; examples include the control of gene expression, protein modification or interaction with a protein or substrate molecule." [GOC:ai, GOC:go_curators]	12122	168	133	18123	0.791667	0.0109718	FB1	['GO:0008150', 'GO:0065007']	['ABI3BP', 'ACKR3', 'ACKR4', 'ADD3', 'ADM', 'AEBP1', 'AHNAK', 'AKAP12', 'AKR1C1', 'AKR1C2', 'AKR1C3', 'ANGPTL1', 'ANK2', 'APOD', 'AXL', 'C1R', 'C1S', 'C3', 'CCDC80', 'CD248', 'CD34', 'CD55', 'CD81', 'CFD', 'CFH', 'CHRDL1', 'CLEC3B', 'CLU', 'CREB5', 'CRIP1', 'CST3', 'CTHRC1', 'CTSK', 'CXCL12', 'DBN1', 'DCN', 'DPT', 'EBF1', 'ECM1', 'EFEMP1', 'ELN', 'ENTPD1', 'FBLN1', 'FBLN2', 'FBLN5', 'FBN1', 'FIBI…
570	GO:BP	GO:0043200	response to amino acid	0.574481	FALSE	"Any process that results in a change in state or activity of a cell or an organism (in terms of movement, secretion, enzyme production, gene expression, etc.) as a result of an amino acid stimulus. An amino acid is a carboxylic acids containing one or more amino groups." [GOC:ef, GOC:mlg]	115	92	5	18123	0.0543478	0.0434783	FB2	['GO:0001101', 'GO:0010243', 'GO:1901700']	['COL1A1', 'COL1A2', 'COL4A1', 'COL5A2', 'COL6A1']
571	GO:BP	GO:0006898	receptor-mediated endocytosis	0.575625	FALSE	"An endocytosis process in which cell surface receptors ensure specificity of transport. A specific receptor on the cell surface binds tightly to the extracellular macromolecule (the ligand) that it recognizes; the plasma-membrane region containing the receptor-ligand complex then undergoes endocytosis, forming a transport vesicle containing the receptor-ligand complex and excluding most other pl…	335	168	11	18123	0.0654762	0.0328358	FB1	['GO:0006897']	['ACKR3', 'ADM', 'C3', 'CD81', 'CLTB', 'CLU', 'HSPG2', 'LRP1', 'RAMP2', 'SDCBP', 'SFRP4']
572	GO:BP	GO:0071495	cellular response to endogenous stimulus	0.579192	FALSE	"Any process that results in a change in state or activity of a cell (in terms of movement, secretion, enzyme production, gene expression, etc.) as a result of a stimulus arising within the organism." [GOC:mah]	1467	155	26	18123	0.167742	0.0177232	FB3	['GO:0009719']	['BMP4', 'CCL2', 'CDKN1C', 'CLDN5', 'DDIT4', 'EEF2', 'EGR1', 'FGFR4', 'FOS', 'FOSB', 'GREM1', 'HES1', 'HEY1', 'HSP90AB1', 'JUN', 'KLF10', 'MYC', 'PDK4', 'PEG10', 'PTPRE', 'RPS27A', 'RXRG', 'SIRT2', 'SOCS3', 'UGCG', 'ZFP36']
573	GO:BP	GO:0001525	angiogenesis	0.583903	FALSE	"Blood vessel formation when new vessels emerge from the proliferation of pre-existing blood vessels." [ISBN:0878932453]	621	92	11	18123	0.119565	0.0177134	FB2	['GO:0048514', 'GO:0048646']	['CALD1', 'COL4A1', 'COL4A2', 'CREB3L1', 'EDNRA', 'ENPP2', 'MDK', 'PLK2', 'SPARC', 'TNMD', 'WNT5A']
574	GO:BP	GO:0043086	negative regulation of catalytic activity	0.58403	FALSE	"Any process that stops or reduces the activity of an enzyme." [GOC:ebc, GOC:jl, GOC:tb, GOC:vw]	841	168	19	18123	0.113095	0.0225922	FB1	['GO:0044092', 'GO:0050790']	['C3', 'CST3', 'ECM1', 'ITGB1BP1', 'LEPR', 'LGALS3', 'LRP1', 'PI16', 'RNH1', 'SERPINF1', 'SERPING1', 'SFRP2', 'SLPI', 'SPOCK1', 'TFPI', 'TIMP1', 'TIMP2', 'TIMP3', 'TXNIP']
575	GO:BP	GO:0051094	positive regulation of developmental process	0.588813	FALSE	"Any process that activates or increases the rate or extent of development, the biological process whose specific outcome is the progression of an organism over time from an initial condition (e.g. a zygote, or a young adult) to a later condition (e.g. a multicellular animal or an aged adult)." [GOC:ai]	1354	168	26	18123	0.154762	0.0192024	FB1	['GO:0032502', 'GO:0048518', 'GO:0050793']	['ABI3BP', 'ADM', 'AXL', 'C3', 'CD34', 'CTHRC1', 'CXCL12', 'DBN1', 'DCN', 'ECM1', 'IL6ST', 'JUND', 'LRP1', 'MEDAG', 'NBL1', 'OSR2', 'PTGIS', 'RAMP2', 'RBPJ', 'SDCBP', 'SERPINF1', 'SFRP2', 'SFRP4', 'TGFBR3', 'THBS2', 'TIMP2']
576	GO:BP	GO:0030282	bone mineralization	0.597975	FALSE	"The deposition of hydroxyapatite, a form of calcium phosphate with the formula Ca10(PO4)6(OH)2, in bone tissue." [GOC:mah, PMID:22936354]	116	92	5	18123	0.0543478	0.0431034	FB2	['GO:0001503', 'GO:0031214']	['ASPN', 'COL1A2', 'GPC3', 'MEF2C', 'TMEM119']
577	GO:BP	GO:0051093	negative regulation of developmental process	0.599093	FALSE	"Any process that stops, prevents or reduces the rate or extent of development, the biological process whose specific outcome is the progression of an organism over time from an initial condition (e.g. a zygote, or a young adult) to a later condition (e.g. a multicellular animal or an aged adult)." [GOC:ai]	984	168	21	18123	0.125	0.0213415	FB1	['GO:0032502', 'GO:0048519', 'GO:0050793']	['CST3', 'CTSK', 'DCN', 'ECM1', 'EFEMP1', 'FBLN1', 'FBN1', 'HSPG2', 'IGFBP5', 'ITGB1BP1', 'PI16', 'RBPJ', 'SEMA3C', 'SERPINF1', 'SFRP2', 'THBS2', 'TMEM176A', 'TMEM176B', 'VASN', 'VAT1', 'YWHAH']
578	GO:BP	GO:0065009	regulation of molecular function	0.600852	FALSE	"Any process that modulates the frequency, rate or extent of a molecular function, an elemental biological activity occurring at the molecular level, such as catalysis or binding." [GOC:isa_complete]	3191	155	45	18123	0.290323	0.0141022	FB3	['GO:0065007']	['ALDH1A1', 'ANGPTL4', 'APOC1', 'APOE', 'BMP4', 'BST2', 'CCL2', 'CDKN1C', 'CLDN5', 'CNN3', 'CXCR4', 'DAG1', 'EGR1', 'EIF4A2', 'FGFR4', 'FOS', 'FXYD6', 'GADD45B', 'GAPDH', 'GREM1', 'HES1', 'HEY1', 'HSP90AB1', 'IL32', 'JSRP1', 'JUN', 'MIDN', 'MIR24-2', 'MYC', 'NET1', 'NPM1', 'PPP1R14B', 'RPL5', 'RPS2', 'RPS27A', 'RPS3', 'SERPINB1', 'SERTAD1', 'SIRT2', 'SOCS3', 'STAC3', 'SYTL2', 'TPD52L1', 'TRDN', '…
579	GO:BP	GO:0060675	ureteric bud morphogenesis	0.602046	FALSE	"The process in which the ureteric bud is generated and organized." [GOC:dph, GOC:mtg_kidney_jan10]	64	92	4	18123	0.0434783	0.0625	FB2	['GO:0001657', 'GO:0072171']	['GPC3', 'HES1', 'MAGED1', 'PTCH1']
580	GO:BP	GO:0098869	cellular oxidant detoxification	0.613804	FALSE	"Any process carried out at the cellular level that reduces or removes the toxicity superoxide radicals or hydrogen peroxide." [GOC:dos, GOC:vw]	99	168	6	18123	0.0357143	0.0606061	FB1	['GO:1990748']	['FBLN5', 'GPX3', 'GPX4', 'MGST1', 'PTGES', 'SOD3']
581	GO:BP	GO:0034341	response to interferon-gamma	0.616324	FALSE	"Any process that results in a change in state or activity of a cell or an organism (in terms of movement, secretion, enzyme production, gene expression, etc.) as a result of an interferon-gamma stimulus. Interferon-gamma is also known as type II interferon." [GOC:add, ISBN:0126896631, PMID:15546383]	198	155	8	18123	0.0516129	0.040404	FB3	['GO:0034097', 'GO:0045087']	['BST2', 'CCL2', 'GAPDH', 'HLA-E', 'HSP90AB1', 'MT2A', 'MYC', 'SOCS3']
582	GO:BP	GO:0071248	cellular response to metal ion	0.616324	FALSE	"Any process that results in a change in state or activity of a cell (in terms of movement, secretion, enzyme production, gene expression, etc.) as a result of a metal ion stimulus." [GOC:mah]	198	155	8	18123	0.0516129	0.040404	FB3	['GO:0010038', 'GO:0071241']	['FOS', 'FOSB', 'JUN', 'JUNB', 'MT1E', 'MT1M', 'MT1X', 'MT2A']
583	GO:BP	GO:0010720	positive regulation of cell development	0.617914	FALSE	"Any process that increases the rate, frequency or extent of the progression of the cell over time, from its formation to the mature structure. Cell development does not include the steps involved in committing a cell to a specific fate." [GOC:BHF, GOC:dph, GOC:tb]	306	155	10	18123	0.0645161	0.0326797	FB3	['GO:0045597', 'GO:0048468', 'GO:0060284']	['BMP4', 'CHODL', 'CLDN5', 'CXCR4', 'DAG1', 'HES1', 'MYC', 'MYF5', 'MYF6', 'SIRT2']
584	GO:BP	GO:0044092	negative regulation of molecular function	0.623592	FALSE	"Any process that stops or reduces the rate or extent of a molecular function, an elemental biological activity occurring at the molecular level, such as catalysis or binding." [GO:jl]	1228	155	23	18123	0.148387	0.0187296	FB3	['GO:0065009']	['ANGPTL4', 'APOC1', 'APOE', 'BMP4', 'BST2', 'CDKN1C', 'CNN3', 'EIF4A2', 'GADD45B', 'GAPDH', 'HES1', 'HEY1', 'JUN', 'MIDN', 'MIR24-2', 'NPM1', 'PPP1R14B', 'RPL5', 'SERPINB1', 'SOCS3', 'SYTL2', 'TRDN', 'ZFP36']
585	GO:BP	GO:0043086	negative regulation of catalytic activity	0.626177	FALSE	"Any process that stops or reduces the activity of an enzyme." [GOC:ebc, GOC:jl, GOC:tb, GOC:vw]	841	155	18	18123	0.116129	0.0214031	FB3	['GO:0044092', 'GO:0050790']	['ANGPTL4', 'APOC1', 'APOE', 'BMP4', 'BST2', 'CDKN1C', 'EIF4A2', 'GADD45B', 'GAPDH', 'MIDN', 'MIR24-2', 'NPM1', 'PPP1R14B', 'RPL5', 'SERPINB1', 'SOCS3', 'SYTL2', 'ZFP36']
586	GO:BP	GO:0030154	cell differentiation	0.629102	FALSE	"The process in which relatively unspecialized cells, e.g. embryonic or regenerative cells, acquire specialized structural and/or functional features that characterize the cells, tissues, or organs of the mature organism or some other relatively stable phase of the organism's life history. Differentiation includes the processes involved in commitment of a cell to a specific fate and its subsequen…	4392	155	57	18123	0.367742	0.0129781	FB3	['GO:0048869']	['ADIRF', 'APOE', 'ATF3', 'BMP4', 'BTG1', 'BTG2', 'CCL2', 'CDH15', 'CHODL', 'CLDN5', 'CNN3', 'COL18A1', 'CXCR4', 'DAG1', 'DDIT4', 'DLK1', 'EEF2', 'EGR1', 'FBL', 'FOS', 'FRZB', 'GADD45B', 'GPM6B', 'GREM1', 'HES1', 'HEY1', 'HSP90AB1', 'JUN', 'JUNB', 'KLF10', 'KLHL41', 'MAFF', 'MAL', 'MIR24-2', 'MYC', 'MYF5', 'MYF6', 'NACA', 'NDRG2', 'NOTCH3', 'NPPC', 'PEG10', 'PITX2', 'RPL24', 'RPS19', 'RPS3A', 'RP…
587	GO:BP	GO:0035791	platelet-derived growth factor receptor-beta signaling pathway	0.6308	FALSE	"A series of molecular signals initiated by the binding of a ligand to a beta-type platelet-derived growth factor receptor (PDGFbeta) on the surface of a signal-receiving cell, and ending with regulation of a downstream cellular process, e.g. transcription." [GOC:bf, GOC:signaling, GOC:yaf, PMID:10372961]	15	168	3	18123	0.0178571	0.2	FB1	['GO:0048008']	['LRP1', 'PDGFRB', 'PDGFRL']
588	GO:BP	GO:0072171	mesonephric tubule morphogenesis	0.63905	FALSE	"The process in which the anatomical structures of a mesonephric tubule are generated and organized. A mesonephric tubule is an epithelial tube that is part of the mesonephros." [GOC:mtg_kidney_jan10]	65	92	4	18123	0.0434783	0.0615385	FB2	['GO:0072078', 'GO:0072164']	['GPC3', 'HES1', 'MAGED1', 'PTCH1']
589	GO:BP	GO:0021872	forebrain generation of neurons	0.63905	FALSE	"The process in which nerve cells are generated in the forebrain. This includes the production of neuroblasts from and their differentiation into neurons." [GO_REF:0000021, GOC:cls, GOC:dgh, GOC:dph, GOC:jid]	65	92	4	18123	0.0434783	0.0615385	FB2	['GO:0030900', 'GO:0048699']	['HES1', 'INHBA', 'ROBO2', 'WNT5A']
590	GO:BP	GO:0042634	regulation of hair cycle	0.651927	FALSE	"Any process that modulates the frequency, rate or extent of the cyclical phases of growth (anagen), regression (catagen), quiescence (telogen), and shedding (exogen) in the life of a hair." [GOC:go_curators, PMID:12230507]	27	92	3	18123	0.0326087	0.111111	FB2	['GO:0042633', 'GO:0051239']	['INHBA', 'KRT17', 'WNT5A']
591	GO:BP	GO:0032967	positive regulation of collagen biosynthetic process	0.651927	FALSE	"Any process that activates or increases the frequency, rate or extent of the chemical reactions and pathways resulting in the formation of collagen, any of a group of fibrous proteins of very high tensile strength that form the main component of connective tissue in animals." [GOC:mah]	27	92	3	18123	0.0326087	0.111111	FB2	['GO:0009891', 'GO:0010714', 'GO:0032964', 'GO:0032965']	['CREB3L1', 'F2R', 'VIM']
592	GO:BP	GO:0003272	endocardial cushion formation	0.651927	FALSE	"The developmental process pertaining to the initial formation of an endocardial cushion. The endocardial cushion is a specialized region of mesenchymal cells that will give rise to the heart septa and valves." [GOC:mtg_heart, PMID:15797462]	27	92	3	18123	0.0326087	0.111111	FB2	['GO:0003203', 'GO:0048646']	['HEY2', 'ROBO2', 'SNAI2']
593	GO:BP	GO:0030514	negative regulation of BMP signaling pathway	0.653807	FALSE	"Any process that stops, prevents, or reduces the frequency, rate or extent of the BMP signaling pathway." [GOC:go_curators]	65	168	5	18123	0.0297619	0.0769231	FB1	['GO:0030509', 'GO:0030510', 'GO:0090101', 'GO:0090288']	['CHRDL1', 'FBN1', 'FSTL1', 'NBL1', 'SFRP2']
594	GO:BP	GO:0010628	positive regulation of gene expression	0.664856	FALSE	"Any process that increases the frequency, rate or extent of gene expression. Gene expression is the process in which a gene's coding sequence is converted into a mature gene product or products (proteins or RNA). This includes the production of an RNA transcript as well as any processing to produce a mature RNA product or an mRNA or circRNA (for protein-coding genes) and the translation of that …	1206	92	16	18123	0.173913	0.013267	FB2	['GO:0010467', 'GO:0010468', 'GO:0010604']	['F2R', 'HEY2', 'ID3', 'INHBA', 'KRT17', 'LUM', 'MDK', 'MEF2C', 'NPM1', 'PABPC1', 'POSTN', 'RBP4', 'SOX4', 'TMEM119', 'VIM', 'WNT5A']
595	GO:BP	GO:0023051	regulation of signaling	0.665506	FALSE	"Any process that modulates the frequency, rate or extent of a signaling process." [GOC:mtg_signal]	3669	168	53	18123	0.315476	0.0144454	FB1	['GO:0023052', 'GO:0050789']	['ACKR3', 'ADM', 'AKAP12', 'AKR1C2', 'AKR1C3', 'ANK2', 'APOD', 'AXL', 'C3', 'CD55', 'CD81', 'CHRDL1', 'CLU', 'CTHRC1', 'CXCL12', 'DBN1', 'DCN', 'ECM1', 'FBLN1', 'FBN1', 'FSTL1', 'GAS1', 'GPNMB', 'IGFBP5', 'IGFBP6', 'IGFBP7', 'IL6ST', 'ITGB1BP1', 'LEPROT', 'LGALS3', 'LRP1', 'LTBP4', 'LY6E', 'NBL1', 'NUPR1', 'PDGFD', 'PDGFRB', 'PTGIS', 'RAMP2', 'RBPJ', 'S100A13', 'SDCBP', 'SFRP2', 'SFRP4', 'SLIT3',…
596	GO:BP	GO:0055069	zinc ion homeostasis	0.670681	FALSE	"Any process involved in the maintenance of an internal steady state of zinc ions within an organism or cell." [GOC:ai, GOC:jid, GOC:mah]	39	155	4	18123	0.0258065	0.102564	FB3	['GO:0055076', 'GO:0072507']	['MT1E', 'MT1M', 'MT1X', 'MT2A']
597	GO:BP	GO:0043403	skeletal muscle tissue regeneration	0.670681	FALSE	"The regrowth of skeletal muscle tissue to repair injured or damaged muscle fibers in the postnatal stage." [GOC:ef, GOC:mtg_muscle, PMID:12021255, PMID:16607119]	39	155	4	18123	0.0258065	0.102564	FB3	['GO:0042246']	['DAG1', 'MYF6', 'NACA', 'SGCA']
598	GO:BP	GO:0048645	animal organ formation	0.677656	FALSE	"The process pertaining to the initial formation of an animal organ from unspecified parts. The process begins with the specific processes that contribute to the appearance of the discrete structure, such as inductive events, and ends when the structural rudiment of the organ is recognizable, such as a condensation of mesenchymal cells into the organ rudiment. Organs are a natural part or structu…	66	92	4	18123	0.0434783	0.0606061	FB2	['GO:0009887', 'GO:0048646']	['HES1', 'MEF2C', 'ROBO2', 'WNT5A']
599	GO:BP	GO:0120036	plasma membrane bounded cell projection organization	0.686727	FALSE	"A process that is carried out at the cellular level which results in the assembly, arrangement of constituent parts, or disassembly of a plasma membrane bounded prolongation or process extending from a cell, e.g. a cilium or axon." [GOC:krc]	1596	92	19	18123	0.206522	0.0119048	FB2	['GO:0030030']	['CDH11', 'ENPP2', 'FSCN1', 'HES1', 'MDK', 'MEF2C', 'NOTCH3', 'PALLD', 'PLK2', 'POSTN', 'PTCH1', 'RAB13', 'ROBO2', 'STMN1', 'STMN2', 'TNN', 'VIM', 'WNT5A', 'WWTR1']
600	GO:BP	GO:0051248	negative regulation of protein metabolic process	0.691825	FALSE	"Any process that stops, prevents, or reduces the frequency, rate or extent of chemical reactions and pathways involving a protein." [GOC:ai]	1216	168	24	18123	0.142857	0.0197368	FB1	['GO:0010605', 'GO:0019538', 'GO:0051172', 'GO:0051246']	['APOD', 'C3', 'CLU', 'CST3', 'ECM1', 'FBLN1', 'GAS1', 'IGFBP5', 'ITGB1BP1', 'ITM2A', 'ITM2B', 'LGALS3', 'LRP1', 'PI16', 'SDCBP', 'SERPINF1', 'SERPING1', 'SFRP2', 'SLPI', 'SPOCK1', 'TFPI', 'TIMP1', 'TIMP2', 'TIMP3']
601	GO:BP	GO:0006629	lipid metabolic process	0.694394	FALSE	"The chemical reactions and pathways involving lipids, compounds soluble in an organic solvent but not, or sparingly, in an aqueous solvent. Includes fatty acids; neutral fats, other fatty-acid esters, and soaps; long-chain (fatty) alcohols and waxes; sphingoids and other long-chain bases; glycolipids, phospholipids and sphingolipids; and carotenes, polyprenols, sterols, terpenes and other isopre…	1446	168	27	18123	0.160714	0.0186722	FB1	['GO:0044238', 'GO:0071704']	['ADH1B', 'ADM', 'AKR1C1', 'AKR1C2', 'AKR1C3', 'APOD', 'C3', 'CD81', 'CLU', 'CYB5R3', 'EPHX1', 'GPX4', 'HSD3B7', 'HSPG2', 'IGFBP7', 'LEPR', 'LIMA1', 'LRP1', 'NPC2', 'PAM', 'PDGFRB', 'PLTP', 'PTGES', 'PTGIS', 'SDC2', 'TNXB', 'YWHAH']
602	GO:BP	GO:0045934	negative regulation of nucleobase-containing compound metabolic process	0.69757	FALSE	"Any cellular process that stops, prevents, or reduces the frequency, rate or extent of the chemical reactions and pathways involving nucleobases, nucleosides, nucleotides and nucleic acids." [GOC:go_curators]	1569	155	27	18123	0.174194	0.0172084	FB3	['GO:0006139', 'GO:0019219', 'GO:0031324', 'GO:0051172']	['ATF3', 'BMP4', 'BTG2', 'CDKN1C', 'CIRBP', 'DDIT4', 'EGR1', 'EIF4A2', 'FOSB', 'GREM1', 'HES1', 'HEY1', 'JUN', 'KLF10', 'MSC', 'MYC', 'MYF6', 'NACA', 'NPM1', 'NPPC', 'PITX2', 'RPL10', 'RPS27A', 'RPS3', 'SIRT2', 'TGIF1', 'ZFP36']
603	GO:BP	GO:0016055	Wnt signaling pathway	0.710627	FALSE	"The series of molecular signals initiated by binding of a Wnt protein to a frizzled family receptor on the surface of the target cell and ending with a change in cell state." [GOC:dph, GOC:go_curators, PMID:11532397]	533	92	10	18123	0.108696	0.0187617	FB2	['GO:0198738', 'GO:1905114']	['CCND1', 'COL1A1', 'DKK3', 'GPC3', 'MDK', 'SNAI2', 'SOX4', 'TNN', 'WNT5A', 'WWTR1']
604	GO:BP	GO:0048568	embryonic organ development	0.711396	FALSE	"Development, taking place during the embryonic phase, of a tissue or tissues that work together to perform a specific function or functions. Development pertains to the process whose specific outcome is the progression of a structure over time, from its formation to the mature structure. Organs are commonly observed as visibly distinct structures, but may also exist as loosely associated cluster…	436	92	9	18123	0.0978261	0.0206422	FB2	['GO:0009790', 'GO:0048513']	['COL11A1', 'HES1', 'HEY2', 'ID3', 'MEF2C', 'MFAP2', 'PTCH1', 'RBP4', 'WNT5A']
605	GO:BP	GO:1902229	regulation of intrinsic apoptotic signaling pathway in response to DNA damage	0.712796	FALSE	"Any process that modulates the frequency, rate or extent of intrinsic apoptotic signaling pathway in response to DNA damage." [GOC:BHF, GOC:mtg_apoptosis, GOC:rl, GOC:TermGenie, PMID:15314165]	37	168	4	18123	0.0238095	0.108108	FB1	['GO:0008630', 'GO:2001020', 'GO:2001242']	['ACKR3', 'CLU', 'CXCL12', 'SFRP2']
606	GO:BP	GO:0006026	aminoglycan catabolic process	0.717902	FALSE	"The chemical reactions and pathways resulting in the breakdown of aminoglycans, any polymer containing amino groups that consists of more than about 10 monosaccharide residues joined to each other by glycosidic linkages." [GOC:ai, ISBN:0198506732]	67	92	4	18123	0.0434783	0.0597015	FB2	['GO:0006022', 'GO:0009057', 'GO:1901136', 'GO:1901565']	['BGN', 'GPC3', 'LUM', 'VCAN']
607	GO:BP	GO:0009891	positive regulation of biosynthetic process	0.719771	FALSE	"Any process that activates or increases the frequency, rate or extent of the chemical reactions and pathways resulting in the formation of substances." [GOC:go_curators]	2013	92	22	18123	0.23913	0.010929	FB2	['GO:0009058', 'GO:0009889', 'GO:0009893']	['COL1A1', 'CREB3L1', 'F2R', 'HES1', 'HEY2', 'HMGN1', 'HNRNPA1', 'INHBA', 'KRT17', 'LMO4', 'LUM', 'MAGED1', 'MDK', 'MEF2C', 'NOTCH3', 'NPM1', 'PABPC1', 'PTCH1', 'SOX4', 'VIM', 'WNT5A', 'WWTR1']
608	GO:BP	GO:0021891	olfactory bulb interneuron development	0.725642	FALSE	"The process whose specific outcome is the progression of an interneuron residing in the olfactory bulb, from its initial commitment, to the fully functional differentiated cell." [GO_REF:0000021, GOC:cls, GOC:dgh, GOC:dph, GOC:jid, PMID:12626695]	6	92	2	18123	0.0217391	0.333333	FB2	['GO:0021884', 'GO:0021889']	['ROBO2', 'WNT5A']
609	GO:BP	GO:0051964	negative regulation of synapse assembly	0.725642	FALSE	"Any process that stops, prevents, or reduces the frequency, rate or extent of synapse assembly, the aggregation, arrangement and bonding together of a set of components to form a synapse." [GOC:ai, GOC:pr]	6	92	2	18123	0.0217391	0.333333	FB2	['GO:0007416', 'GO:0051961', 'GO:0051963', 'GO:1901889', 'GO:1905809']	['ROBO2', 'WNT5A']
610	GO:BP	GO:0010714	positive regulation of collagen metabolic process	0.727482	FALSE	"Any process that increases the frequency, rate or extent of the chemical reactions and pathways resulting in the metabolism of collagen, any of a group of fibrous proteins of very high tensile strength that form the main component of connective tissue in animals." [GOC:dph, GOC:tb]	28	92	3	18123	0.0326087	0.107143	FB2	['GO:0009893', 'GO:0010712', 'GO:0032963']	['CREB3L1', 'F2R', 'VIM']
611	GO:BP	GO:0040007	growth	0.727675	FALSE	"The increase in size or mass of an entire organism, a part of an organism or a cell." [GOC:bf, GOC:ma]	973	92	14	18123	0.152174	0.0143885	FB2	['GO:0008150']	['GPC3', 'HEY2', 'INHBA', 'KRT17', 'MDK', 'MEF2C', 'NPM1', 'POSTN', 'PTCH1', 'RBP4', 'SERPINE2', 'TNN', 'WNT5A', 'WWTR1']
612	GO:BP	GO:0198738	cell-cell signaling by wnt	0.731893	FALSE	"Any process that mediates the transfer of information from one cell to another, medaited by a wnt family protein ligand. This process includes wnt signal transduction in the receiving cell, release of wnt ligand from a secreting cell as well as any processes that actively facilitate wnt transport and presentation to receptor on the recieving cell." [GOC:dos]	535	92	10	18123	0.108696	0.0186916	FB2	['GO:0007267']	['CCND1', 'COL1A1', 'DKK3', 'GPC3', 'MDK', 'SNAI2', 'SOX4', 'TNN', 'WNT5A', 'WWTR1']
613	GO:BP	GO:1902895	positive regulation of pri-miRNA transcription by RNA polymerase II	0.740275	FALSE	"Any process that activates or increases the frequency, rate or extent of pri-miRNA transcription mediated by RNA polymerase II." [GO_REF:0000058, GOC:dph, GOC:kmv, GOC:TermGenie, PMID:24699545]	40	155	4	18123	0.0258065	0.1	FB3	['GO:0045944', 'GO:0061614', 'GO:1902893']	['BMP4', 'EGR1', 'FOS', 'JUN']
614	GO:BP	GO:0072210	metanephric nephron development	0.740275	FALSE	"The process whose specific outcome is the progression of a nephron in the metanephros over time, from its formation to the mature structure. A nephron is the functional unit of the kidney." [GOC:mtg_kidney_jan10]	40	155	4	18123	0.0258065	0.1	FB3	['GO:0001656', 'GO:0072006']	['BMP4', 'EGR1', 'GREM1', 'HES1']
615	GO:BP	GO:1905114	cell surface receptor signaling pathway involved in cell-cell signaling	0.74392	FALSE	"Any cell surface receptor signaling pathway that is involved in cell-cell signaling." [GO_REF:0000060, GOC:TermGenie, ISBN:0-7167-3051-0]	639	92	11	18123	0.119565	0.0172144	FB2	['GO:0007166', 'GO:0007267']	['CCND1', 'COL1A1', 'DKK3', 'GPC3', 'MDK', 'MEF2C', 'SNAI2', 'SOX4', 'TNN', 'WNT5A', 'WWTR1']
616	GO:BP	GO:0019748	secondary metabolic process	0.75315	FALSE	"The chemical reactions and pathways resulting in many of the chemical changes of compounds that are not necessarily required for growth and maintenance of cells, and are often unique to a taxon. In multicellular organisms secondary metabolism is generally carried out in specific cell types, and may be useful for the organism as a whole. In unicellular organisms, secondary metabolism is often use…	67	168	5	18123	0.0297619	0.0746269	FB1	['GO:0008152']	['AKR1C1', 'AKR1C2', 'AKR1C3', 'MGST1', 'PAM']
617	GO:BP	GO:0003008	system process	0.755656	FALSE	"A multicellular organismal process carried out by any of the organs or tissues in an organ system. An organ system is a regularly interacting or interdependent group of organs or tissues that work together to carry out a biological objective." [GOC:mtg_cardio]	2306	92	24	18123	0.26087	0.0104076	FB2	['GO:0032501']	['CALD1', 'COL11A1', 'COL1A1', 'COL1A2', 'EDNRA', 'EDNRB', 'F2R', 'HEY2', 'INHBA', 'LAMC3', 'LUM', 'MDK', 'MEF2C', 'MYL4', 'PLK2', 'POSTN', 'PTGER3', 'RBP4', 'SERPINE2', 'SLC26A7', 'SNAI2', 'TPM2', 'VIM', 'WWTR1']
618	GO:BP	GO:0006720	isoprenoid metabolic process	0.756923	FALSE	"The chemical reactions and pathways involving isoprenoid compounds, isoprene (2-methylbuta-1,3-diene) or compounds containing or derived from linked isoprene (3-methyl-2-butenylene) residues." [ISBN:0198547684]	144	168	7	18123	0.0416667	0.0486111	FB1	['GO:0044255']	['ADH1B', 'AKR1C1', 'AKR1C3', 'HSPG2', 'LRP1', 'NPC2', 'SDC2']
619	GO:BP	GO:0007178	transmembrane receptor protein serine/threonine kinase signaling pathway	0.76268	FALSE	"A series of molecular signals initiated by the binding of an extracellular ligand to a receptor on the surface of the target cell where the receptor possesses serine/threonine kinase activity, and ending with regulation of a downstream cellular process, e.g. transcription." [GOC:mah, GOC:signaling]	374	155	11	18123	0.0709677	0.0294118	FB3	['GO:0007167']	['BMP4', 'CDKN1C', 'CLDN5', 'EGR1', 'FOS', 'GREM1', 'HES1', 'HSP90AB1', 'JUN', 'PEG10', 'RPS27A']
620	GO:BP	GO:0032970	regulation of actin filament-based process	0.763444	FALSE	"Any process that modulates the frequency, rate or extent of any cellular process that depends upon or alters the actin cytoskeleton." [GOC:mah]	404	168	12	18123	0.0714286	0.029703	FB1	['GO:0030029', 'GO:0050794']	['ADD3', 'ANK2', 'CXCL12', 'DBN1', 'ELN', 'GSN', 'ITGB1BP1', 'LIMA1', 'LRP1', 'PAM', 'PDGFRB', 'TMSB4X']
621	GO:BP	GO:0072109	glomerular mesangium development	0.771094	FALSE	"The process whose specific outcome is the progression of the glomerular mesangium over time, from its formation to the mature structure. The glomerular mesangium is the thin membrane connective tissue composed of mesangial cells, which helps to support the capillary loops in a renal glomerulus." [GOC:mtg_kidney_jan10]	16	168	3	18123	0.0178571	0.1875	FB1	['GO:0061448', 'GO:0072012']	['CD34', 'PDGFD', 'PDGFRB']
622	GO:BP	GO:0044092	negative regulation of molecular function	0.79747	FALSE	"Any process that stops or reduces the rate or extent of a molecular function, an elemental biological activity occurring at the molecular level, such as catalysis or binding." [GO:jl]	1228	168	24	18123	0.142857	0.019544	FB1	['GO:0065009']	['C3', 'CST3', 'ECM1', 'ITGB1BP1', 'LEPR', 'LGALS3', 'LRP1', 'LY6E', 'NUPR1', 'PI16', 'PTGIS', 'RNH1', 'SERPINF1', 'SERPING1', 'SFRP2', 'SFRP4', 'SLPI', 'SPOCK1', 'TFPI', 'TIMP1', 'TIMP2', 'TIMP3', 'TMSB4X', 'TXNIP']
623	GO:BP	GO:0065007	biological regulation	0.799529	FALSE	"Any process that modulates a measurable attribute of any biological process, quality or function." [GOC:dph, GOC:isa_complete, GOC:mah, GOC:pr, GOC:vw]	12802	168	138	18123	0.821429	0.0107796	FB1	['GO:0008150']	['ABI3BP', 'ACKR3', 'ACKR4', 'ADD3', 'ADH1B', 'ADM', 'AEBP1', 'AHNAK', 'AKAP12', 'AKR1C1', 'AKR1C2', 'AKR1C3', 'ANGPTL1', 'ANK2', 'APOD', 'AXL', 'C1R', 'C1S', 'C3', 'CCDC80', 'CD248', 'CD34', 'CD55', 'CD81', 'CFD', 'CFH', 'CHRDL1', 'CLEC3B', 'CLU', 'CREB5', 'CRIP1', 'CST3', 'CTHRC1', 'CTSK', 'CXCL12', 'CYBRD1', 'DBN1', 'DCN', 'DPT', 'EBF1', 'ECM1', 'EFEMP1', 'ELN', 'ENTPD1', 'FBLN1', 'FBLN2', 'FB…
624	GO:BP	GO:0008630	intrinsic apoptotic signaling pathway in response to DNA damage	0.800193	FALSE	"A series of molecular signals in which an intracellular signal is conveyed to trigger the apoptotic death of a cell. The pathway is induced by the detection of DNA damage, and ends when the execution phase of apoptosis is triggered." [GOC:go_curators, GOC:mtg_apoptosis]	104	168	6	18123	0.0357143	0.0576923	FB1	['GO:0006974', 'GO:0097193']	['ACKR3', 'CLU', 'CRIP1', 'CXCL12', 'NUPR1', 'SFRP2']
625	GO:BP	GO:0021522	spinal cord motor neuron differentiation	0.808449	FALSE	"The process in which neuroepithelial cells in the ventral neural tube acquire specialized structural and/or functional features of motor neurons. Motor neurons innervate an effector (muscle or glandular) tissue and are responsible for transmission of motor impulses from the brain to the periphery. Differentiation includes the processes involved in commitment of a cell to a specific fate." [GO_RE…	29	92	3	18123	0.0326087	0.103448	FB2	['GO:0021515', 'GO:0021517', 'GO:0021953']	['LMO4', 'PTCH1', 'SOX4']
626	GO:BP	GO:0003209	cardiac atrium morphogenesis	0.808449	FALSE	"The process in which the cardiac atrium is generated and organized. A cardiac atrium receives blood from a vein and pumps it to a cardiac ventricle." [GOC:mtg_heart]	29	92	3	18123	0.0326087	0.103448	FB2	['GO:0003206', 'GO:0003230']	['HEY2', 'SOX4', 'WNT5A']
627	GO:BP	GO:0048518	positive regulation of biological process	0.812117	FALSE	"Any process that activates or increases the frequency, rate or extent of a biological process. Biological processes are regulated by many means; examples include the control of gene expression, protein modification or interaction with a protein or substrate molecule." [GOC:jid]	6474	92	49	18123	0.532609	0.00756874	FB2	['GO:0008150', 'GO:0050789']	['CCND1', 'CLEC11A', 'COL1A1', 'COL3A1', 'CREB3L1', 'EDNRB', 'ENHO', 'ENPP2', 'F2R', 'F2RL2', 'FSCN1', 'GPC3', 'HES1', 'HEY2', 'HMGN1', 'HNRNPA1', 'ID3', 'IL11RA', 'INHBA', 'KRT17', 'LMO4', 'LUM', 'MAGED1', 'MARCKSL1', 'MDK', 'MEF2C', 'MFAP2', 'NAP1L1', 'NOTCH3', 'NPM1', 'PABPC1', 'PHLDA1', 'PLK2', 'POSTN', 'PTCH1', 'PTGER3', 'RAB34', 'RBP4', 'ROBO2', 'SERPINE2', 'SNAI2', 'SOX4', 'SPARC', 'STMN1'…
628	GO:BP	GO:0044092	negative regulation of molecular function	0.812385	FALSE	"Any process that stops or reduces the rate or extent of a molecular function, an elemental biological activity occurring at the molecular level, such as catalysis or binding." [GO:jl]	1228	92	16	18123	0.173913	0.0130293	FB2	['GO:0065009']	['COL6A3', 'DKK3', 'DPEP1', 'EDNRB', 'GEM', 'GPC3', 'HES1', 'HEY2', 'ID3', 'NPM1', 'PPP1R14A', 'PTCH1', 'SERPINE2', 'SERPINH1', 'STMN1', 'WWTR1']
629	GO:BP	GO:0045746	negative regulation of Notch signaling pathway	0.814883	FALSE	"Any process that stops, prevents, or reduces the frequency, rate or extent of the Notch signaling pathway." [GOC:go_curators]	41	155	4	18123	0.0258065	0.097561	FB3	['GO:0007219', 'GO:0008593', 'GO:0009968']	['DLK1', 'HEY1', 'NOTCH3', 'TSPAN15']
630	GO:BP	GO:0048584	positive regulation of response to stimulus	0.846843	FALSE	"Any process that activates, maintains or increases the rate of a response to a stimulus. Response to stimulus is a change in state or activity of a cell or an organism (in terms of movement, secretion, enzyme production, gene expression, etc.) as a result of a stimulus." [GOC:jid]	2368	168	38	18123	0.22619	0.0160473	FB1	['GO:0048518', 'GO:0048583', 'GO:0050896']	['ACKR3', 'AKAP12', 'AKR1C2', 'AKR1C3', 'AXL', 'C1R', 'C1S', 'C3', 'CD55', 'CD81', 'CFD', 'CFH', 'CLU', 'CXCL12', 'DCN', 'ECM1', 'GPNMB', 'IGFBP5', 'IGFBP6', 'IL6ST', 'ITGB1BP1', 'LGALS3', 'LRP1', 'MFAP4', 'NUPR1', 'PDGFD', 'PDGFRB', 'PTGIS', 'RBPJ', 'S100A13', 'SDCBP', 'SERPING1', 'SFRP2', 'SFRP4', 'TGFBR3', 'TIMP2', 'TIMP3', 'TMSB4X']
631	GO:BP	GO:0003208	cardiac ventricle morphogenesis	0.848891	FALSE	"The process in which the cardiac ventricle is generated and organized. A cardiac ventricle receives blood from a cardiac atrium and pumps it out of the heart." [GOC:mtg_heart]	70	92	4	18123	0.0434783	0.0571429	FB2	['GO:0003206', 'GO:0003231']	['COL11A1', 'HEY2', 'MEF2C', 'SOX4']
632	GO:BP	GO:0071674	mononuclear cell migration	0.857201	FALSE	"The movement of a mononuclear cell within or between different tissues and organs of the body." [GOC:mah]	193	168	8	18123	0.047619	0.0414508	FB1	['GO:0050900']	['APOD', 'CXCL12', 'ECM1', 'HSD3B7', 'LGALS3', 'NBL1', 'PDGFD', 'XG']
633	GO:BP	GO:0061771	response to caloric restriction	0.862375	FALSE	"A change in state or activity of a cell or an organism (in terms of movement, secretion, enzyme production, gene expression, etc.) as a result of a caloric restriction, insufficient food energy intake." [GOC:dph, PMID:15520862]	4	155	2	18123	0.0129032	0.5	FB3	['GO:0006950', 'GO:0031667']	['APOE', 'SIRT2']
634	GO:BP	GO:1902626	assembly of large subunit precursor of preribosome	0.862375	FALSE	"The aggregation, arrangement and bonding together of a set of components to form the large subunit precursor of the preribosome." [GO_REF:0000079, GOC:di, GOC:TermGenie, PMID:22735702]	4	155	2	18123	0.0129032	0.5	FB3	['GO:0022618']	['RPL24', 'RSL24D1']
635	GO:BP	GO:0061325	cell proliferation involved in outflow tract morphogenesis	0.862375	FALSE	"The multiplication or reproduction of cells, resulting in the expansion of a cell population that contributes to the shaping of the outflow tract." [GOC:dph, GOC:mtg_heart]	4	155	2	18123	0.0129032	0.5	FB3	['GO:0003151', 'GO:0061323']	['BMP4', 'PITX2']
636	GO:BP	GO:0010812	negative regulation of cell-substrate adhesion	0.863488	FALSE	"Any process that decreases the frequency, rate or extent of cell-substrate adhesion. Cell-substrate adhesion is the attachment of a cell to the underlying substrate via adhesion molecules." [GOC:dph, GOC:pf, GOC:tb]	69	168	5	18123	0.0297619	0.0724638	FB1	['GO:0007162', 'GO:0010810', 'GO:0031589']	['APOD', 'FBLN1', 'ITGB1BP1', 'LRP1', 'SPOCK1']
637	GO:BP	GO:0046688	response to copper ion	0.89471	FALSE	"Any process that results in a change in state or activity of a cell or an organism (in terms of movement, secretion, enzyme production, gene expression, etc.) as a result of a copper ion stimulus." [GOC:ai]	42	155	4	18123	0.0258065	0.0952381	FB3	['GO:0010038']	['MT1E', 'MT1M', 'MT1X', 'MT2A']
638	GO:BP	GO:0048468	cell development	0.907925	FALSE	"The process whose specific outcome is the progression of the cell over time, from its formation to the mature structure. Cell development does not include the steps involved in committing a cell to a specific fate." [GOC:go_curators]	2122	168	35	18123	0.208333	0.0164939	FB1	['GO:0030154', 'GO:0048856', 'GO:0048869']	['ADM', 'ANK2', 'APOD', 'AXL', 'C3', 'CLU', 'CTHRC1', 'CXCL12', 'DBN1', 'ECM1', 'FBLN1', 'FBN1', 'GAS7', 'GFRA1', 'GSN', 'IL6ST', 'ITGB1BP1', 'JUND', 'LRP1', 'NBL1', 'NDRG1', 'NTN4', 'PDGFRB', 'PI16', 'PMP22', 'RAMP2', 'S100A6', 'SDC2', 'SEMA3C', 'SERPINF1', 'SFRP2', 'SLIT3', 'SPOCK1', 'TGFBR3', 'YWHAH']
639	GO:BP	GO:0060716	labyrinthine layer blood vessel development	0.911258	FALSE	"The process whose specific outcome is the progression of a blood vessel of the labyrinthine layer of the placenta over time, from its formation to the mature structure. The embryonic vessels grow through the layer to come in close contact with the maternal blood supply." [GOC:dph]	18	155	3	18123	0.0193548	0.166667	FB3	['GO:0048568', 'GO:0048608', 'GO:0060674', 'GO:0060711']	['HES1', 'HEY1', 'JUNB']
640	GO:BP	GO:0003208	cardiac ventricle morphogenesis	0.92302	FALSE	"The process in which the cardiac ventricle is generated and organized. A cardiac ventricle receives blood from a cardiac atrium and pumps it out of the heart." [GOC:mtg_heart]	70	168	5	18123	0.0297619	0.0714286	FB1	['GO:0003206', 'GO:0003231']	['LY6E', 'RBPJ', 'SEMA3C', 'SFRP2', 'TGFBR3']
641	GO:BP	GO:2001212	regulation of vasculogenesis	0.929968	FALSE	"Any process that modulates the frequency, rate or extent of vasculogenesis." [GOC:obol]	17	168	3	18123	0.0178571	0.176471	FB1	['GO:0001570', 'GO:0045595']	['ADM', 'CD34', 'RAMP2']
642	GO:BP	GO:0006957	complement activation, alternative pathway	0.929968	FALSE	"Any process involved in the activation of any of the steps of the alternative pathway of the complement cascade which allows for the direct killing of microbes and the regulation of other immune processes." [GOC:add, ISBN:0781735149]	17	168	3	18123	0.0178571	0.176471	FB1	['GO:0006956', 'GO:0045087']	['C3', 'CFD', 'CFH']
643	GO:BP	GO:0001523	retinoid metabolic process	0.931576	FALSE	"The chemical reactions and pathways involving retinoids, any member of a class of isoprenoids that contain or are derived from four prenyl groups linked head-to-tail. Retinoids include retinol and retinal and structurally similar natural derivatives or synthetic compounds, but need not have vitamin A activity." [ISBN:0198506732]	107	168	6	18123	0.0357143	0.0560748	FB1	['GO:0016101']	['ADH1B', 'AKR1C1', 'AKR1C3', 'HSPG2', 'LRP1', 'SDC2']
644	GO:BP	GO:1904035	regulation of epithelial cell apoptotic process	0.931576	FALSE	"Any process that modulates the frequency, rate or extent of epithelial cell apoptotic process." [GO_REF:0000058, GOC:TermGenie, PMID:19137015]	107	168	6	18123	0.0357143	0.0560748	FB1	['GO:0042981', 'GO:1904019']	['AKR1C3', 'CD248', 'GSN', 'NUPR1', 'RAMP2', 'SFRP4']
645	GO:BP	GO:0009966	regulation of signal transduction	0.937214	FALSE	"Any process that modulates the frequency, rate or extent of signal transduction." [GOC:sm]	3251	92	30	18123	0.326087	0.00922793	FB2	['GO:0007165', 'GO:0010646', 'GO:0023051', 'GO:0048583']	['ASPN', 'COL1A1', 'COL3A1', 'CREB3L1', 'DKK3', 'ENHO', 'F2R', 'F2RL2', 'GPC3', 'HES1', 'HEY2', 'INHBA', 'MAGED1', 'MDK', 'MEF2C', 'NOTCH3', 'NPM1', 'PLK2', 'POSTN', 'PTCH1', 'RAB34', 'ROBO2', 'SERPINE2', 'SNAI2', 'SOX4', 'STMN1', 'TNMD', 'TNN', 'WNT5A', 'WWTR1']
646	GO:BP	GO:0061035	regulation of cartilage development	0.945159	FALSE	"Any process that modulates the rate, frequency, or extent of cartilage development, the process whose specific outcome is the progression of the cartilage over time, from its formation to the mature structure. Cartilage is a connective tissue dominated by extracellular matrix containing collagen type II and large amounts of proteoglycan, particularly chondroitin sulfate." [GOC:dph]	72	92	4	18123	0.0434783	0.0555556	FB2	['GO:0051216', 'GO:2000026']	['MDK', 'SNAI2', 'TRPS1', 'WNT5A']
647	GO:BP	GO:0045765	regulation of angiogenesis	0.958231	FALSE	"Any process that modulates the frequency, rate or extent of angiogenesis." [GOC:go_curators]	361	92	8	18123	0.0869565	0.0221607	FB2	['GO:0001525', 'GO:0022603', 'GO:1901342']	['COL4A2', 'CREB3L1', 'ENPP2', 'MDK', 'PLK2', 'SPARC', 'TNMD', 'WNT5A']
648	GO:BP	GO:0001568	blood vessel development	0.962679	FALSE	"The process whose specific outcome is the progression of a blood vessel over time, from its formation to the mature structure. The blood vessel is the vasculature carrying blood." [GOC:hjd, UBERON:0001981]	797	155	17	18123	0.109677	0.02133	FB3	['GO:0001944', 'GO:0048856']	['ANGPTL4', 'APOE', 'BMP4', 'BTG1', 'CCL2', 'CLDN5', 'COL18A1', 'CXCR4', 'DAG1', 'EGR1', 'GREM1', 'HES1', 'HEY1', 'JUN', 'JUNB', 'MIR24-2', 'SOCS3']
649	GO:BP	GO:0045595	regulation of cell differentiation	0.966138	FALSE	"Any process that modulates the frequency, rate or extent of cell differentiation, the process in which relatively unspecialized cells acquire specialized structural and functional features." [GOC:go_curators]	1688	155	28	18123	0.180645	0.0165877	FB3	['GO:0030154', 'GO:0050793', 'GO:0050794']	['ADIRF', 'BMP4', 'BTG1', 'CDH15', 'CHODL', 'CLDN5', 'CXCR4', 'DAG1', 'FOS', 'FRZB', 'GREM1', 'HES1', 'HEY1', 'HSP90AB1', 'JUN', 'JUNB', 'KLF10', 'KLHL41', 'MAFF', 'MYC', 'MYF5', 'MYF6', 'NACA', 'NPPC', 'RPS19', 'SIRT2', 'SOCS3', 'ZFP36']
650	GO:BP	GO:1990410	adrenomedullin receptor signaling pathway	0.973685	FALSE	"A series of molecular signals initiated by an extracellular adrenomedullin combining with a dimeric adrenomedullin receptor on the surface of the target cell." [GOC:bhm, PMID:10882736]	4	168	2	18123	0.0119048	0.5	FB1	['GO:0097646']	['ADM', 'RAMP2']
651	GO:BP	GO:0071799	cellular response to prostaglandin D stimulus	0.973685	FALSE	"Any process that results in a change in state or activity of a cell (in terms of movement, secretion, enzyme production, gene expression, etc.) as a result of a prostagladin D stimulus." [GOC:sl]	4	168	2	18123	0.0119048	0.5	FB1	['GO:0071379', 'GO:0071798', 'GO:0097306', 'GO:1901655']	['AKR1C2', 'AKR1C3']
652	GO:BP	GO:0035582	sequestering of BMP in extracellular matrix	0.973685	FALSE	"Confining a bone morphogenetic protein (BMP) to the extracellular matrix (ECM), such that it is separated from other components of the signaling pathway, including its cell surface receptor. Bone morphogenetic proteins (BMPs) are secreted as homodimers, non-covalently associated with N-terminal pro-peptides, and are targeted to the extracellular matrix through interaction with matrix proteins." …	4	168	2	18123	0.0119048	0.5	FB1	['GO:0030514', 'GO:0035581', 'GO:0071694']	['FBN1', 'NBL1']
653	GO:BP	GO:0071798	response to prostaglandin D	0.973685	FALSE	"Any process that results in a change in state or activity of a cell or an organism (in terms of movement, secretion, enzyme production, gene expression, etc.) as a result of a prostagladin D stimulus." [GOC:sl]	4	168	2	18123	0.0119048	0.5	FB1	['GO:0034694', 'GO:0097305', 'GO:1901654']	['AKR1C2', 'AKR1C3']
654	GO:BP	GO:0042060	wound healing	0.975419	FALSE	"The series of events that restore integrity to a damaged tissue, following an injury." [GOC:bf, PMID:15269788]	555	92	10	18123	0.108696	0.018018	FB2	['GO:0009611']	['ADAMTS18', 'COL1A1', 'COL1A2', 'COL3A1', 'F2R', 'F2RL2', 'POSTN', 'SERPINE2', 'SPARC', 'WNT5A']
655	GO:BP	GO:0006936	muscle contraction	0.993756	FALSE	"A process in which force is generated within muscle tissue, resulting in a change in muscle geometry. Force generation involves a chemo-mechanical energy conversion step that is carried out by the actin/myosin complex activity, which generates force through ATP hydrolysis." [GOC:ef, GOC:mtg_muscle, ISBN:0198506732]	363	92	8	18123	0.0869565	0.0220386	FB2	['GO:0003012']	['CALD1', 'EDNRA', 'EDNRB', 'F2R', 'MYL4', 'PTGER3', 'TPM2', 'VIM']
656	GO:BP	GO:0072078	nephron tubule morphogenesis	0.996098	FALSE	"The process in which the anatomical structures of a nephron tubule are generated and organized. A nephron tubule is an epithelial tube that is part of the nephron, the functional part of the kidney." [GOC:mtg_kidney_jan10]	73	92	4	18123	0.0434783	0.0547945	FB2	['GO:0061333', 'GO:0072080', 'GO:0072088']	['GPC3', 'HES1', 'MAGED1', 'PTCH1']
657	GO:BP	GO:0001822	kidney development	1	FALSE	"The process whose specific outcome is the progression of the kidney over time, from its formation to the mature structure. The kidney is an organ that filters the blood and/or excretes the end products of body metabolism in the form of urine." [GOC:dph, GOC:mtg_kidney_jan10, ISBN:0124020607, ISBN:0721662544]	294	155	5	18123	0.0322581	0.0170068	FB3	['GO:0048513', 'GO:0072001']	['BMP4', 'EGR1', 'GREM1', 'HES1', 'MYC']
658	GO:BP	GO:0001933	negative regulation of protein phosphorylation	1	FALSE	"Any process that stops, prevents or reduces the rate of addition of phosphate groups to amino acids within a protein." [GOC:hjd]	375	155	10	18123	0.0645161	0.0266667	FB3	['GO:0001932', 'GO:0006468', 'GO:0031400', 'GO:0042326']	['APOE', 'BMP4', 'CDKN1C', 'DDIT4', 'GADD45B', 'GREM1', 'MIR24-2', 'NPM1', 'SIRT2', 'SOCS3']
659	GO:BP	GO:0001934	positive regulation of protein phosphorylation	1	FALSE	"Any process that activates or increases the frequency, rate or extent of addition of phosphate groups to amino acids within a protein." [GOC:hjd]	846	155	13	18123	0.083871	0.0153664	FB3	['GO:0001932', 'GO:0006468', 'GO:0031401', 'GO:0042327']	['BMP4', 'CXCR4', 'DAG1', 'EGR1', 'GADD45B', 'GREM1', 'HES1', 'HSP90AB1', 'NPM1', 'RPS27A', 'RPS3', 'SOCS3', 'TPD52L1']
660	GO:BP	GO:0001935	endothelial cell proliferation	1	FALSE	"The multiplication or reproduction of endothelial cells, resulting in the expansion of a cell population. Endothelial cells are thin flattened cells which line the inside surfaces of body cavities, blood vessels, and lymph vessels, making up the endothelium." [GOC:add, ISBN:0781735149]	204	155	4	18123	0.0258065	0.0196078	FB3	['GO:0050673']	['APOE', 'BMP4', 'CCL2', 'MIR24-2']
661	GO:BP	GO:0001936	regulation of endothelial cell proliferation	1	FALSE	"Any process that modulates the frequency, rate, or extent of endothelial cell proliferation." [GOC:add]	188	155	4	18123	0.0258065	0.0212766	FB3	['GO:0001935', 'GO:0050678']	['APOE', 'BMP4', 'CCL2', 'MIR24-2']
662	GO:BP	GO:0001937	negative regulation of endothelial cell proliferation	1	FALSE	"Any process that stops, prevents, or reduces the rate or extent of endothelial cell proliferation." [GOC:add]	83	155	3	18123	0.0193548	0.0361446	FB3	['GO:0001935', 'GO:0001936', 'GO:0050680']	['APOE', 'CCL2', 'MIR24-2']
663	GO:BP	GO:0006140	regulation of nucleotide metabolic process	1	FALSE	"Any process that modulates the frequency, rate or extent of the chemical reactions and pathways involving nucleotides." [GOC:go_curators]	123	155	3	18123	0.0193548	0.0243902	FB3	['GO:0009117', 'GO:0019219', 'GO:0019220', 'GO:0062012']	['DDIT4', 'MYC', 'PDK4']
664	GO:BP	GO:0006094	gluconeogenesis	1	FALSE	"The formation of glucose from noncarbohydrate precursors, such as pyruvate, amino acids and glycerol." [MetaCyc:GLUCONEO-PWY]	90	155	3	18123	0.0193548	0.0333333	FB3	['GO:0006006', 'GO:0019319']	['ALDOA', 'ATF3', 'GAPDH']
665	GO:BP	GO:0006069	ethanol oxidation	1	FALSE	"An ethanol metabolic process in which ethanol is converted to acetyl-CoA via acetaldehyde and acetate." [GOC:mah, MetaCyc:PWY66-161, MetaCyc:PWY66-162, MetaCyc:PWY66-21]	12	155	1	18123	0.00645161	0.0833333	FB3	['GO:0006067', 'GO:0006091']	['ALDH1A1']
666	GO:BP	GO:0006091	generation of precursor metabolites and energy	1	FALSE	"The chemical reactions and pathways resulting in the formation of precursor metabolites, substances from which energy is derived, and any process involved in the liberation of energy from these substances." [GOC:jl]	545	155	6	18123	0.0387097	0.0110092	FB3	['GO:0044237']	['ALDH1A1', 'ALDOA', 'CHCHD10', 'DDIT4', 'GAPDH', 'MYC']
667	GO:BP	GO:0001938	positive regulation of endothelial cell proliferation	1	FALSE	"Any process that activates or increases the rate or extent of endothelial cell proliferation." [GOC:add]	113	155	1	18123	0.00645161	0.00884956	FB3	['GO:0001935', 'GO:0001936', 'GO:0050679']	['BMP4']
668	GO:BP	GO:0001941	postsynaptic membrane organization	1	FALSE	"A process which results in the assembly, arrangement of constituent parts, or disassembly of a postsynaptic membrane, the specialized area of membrane facing the presynaptic membrane on the tip of the nerve ending and separated from it by a minute cleft (the synaptic cleft)." [GOC:dph, GOC:pr]	39	155	2	18123	0.0129032	0.0512821	FB3	['GO:0061024', 'GO:0099173']	['APOE', 'RAPSN']
669	GO:BP	GO:0006090	pyruvate metabolic process	1	FALSE	"The chemical reactions and pathways involving pyruvate, 2-oxopropanoate." [GOC:go_curators]	152	155	6	18123	0.0387097	0.0394737	FB3	['GO:0032787']	['ALDOA', 'DDIT4', 'GAPDH', 'LDHB', 'MYC', 'PDK4']
670	GO:BP	GO:0001944	vasculature development	1	FALSE	"The process whose specific outcome is the progression of the vasculature over time, from its formation to the mature structure. The vasculature is an interconnected tubular multi-tissue structure that contains fluid that is actively transported around the organism." [GOC:dph, UBERON:0002409]	834	155	17	18123	0.109677	0.0203837	FB3	['GO:0048731', 'GO:0072359']	['ANGPTL4', 'APOE', 'BMP4', 'BTG1', 'CCL2', 'CLDN5', 'COL18A1', 'CXCR4', 'DAG1', 'EGR1', 'GREM1', 'HES1', 'HEY1', 'JUN', 'JUNB', 'MIR24-2', 'SOCS3']
671	GO:BP	GO:0001825	blastocyst formation	1	FALSE	"The initial formation of a blastocyst from a solid ball of cells known as a morula." [GOC:dph, ISBN:0124020607, ISBN:0198542771]	40	155	1	18123	0.00645161	0.025	FB3	['GO:0001824', 'GO:0048646']	['JUNB']
672	GO:BP	GO:0006081	cellular aldehyde metabolic process	1	FALSE	"The chemical reactions and pathways involving aldehydes, any organic compound with the formula R-CH=O, as carried out by individual cells." [GOC:go_curators, ISBN:0198506732]	65	155	1	18123	0.00645161	0.0153846	FB3	['GO:0044237', 'GO:0071704']	['ALDH1A1']
673	GO:BP	GO:0006163	purine nucleotide metabolic process	1	FALSE	"The chemical reactions and pathways involving a purine nucleotide, a compound consisting of nucleoside (a purine base linked to a deoxyribose or ribose sugar) esterified with a phosphate group at either the 3' or 5'-hydroxyl group of the sugar." [GOC:go_curators, ISBN:0198506732]	446	155	7	18123	0.0451613	0.0156951	FB3	['GO:0009117', 'GO:0072521']	['ALDOA', 'DDIT4', 'GAPDH', 'IMPDH2', 'MYC', 'NPPC', 'PDK4']
674	GO:BP	GO:0001824	blastocyst development	1	FALSE	"The process whose specific outcome is the progression of the blastocyst over time, from its formation to the mature structure. The mammalian blastocyst is a hollow ball of cells containing two cell types, the inner cell mass and the trophectoderm." [GOC:dph, ISBN:0124020607, ISBN:0198542771]	110	155	2	18123	0.0129032	0.0181818	FB3	['GO:0001701', 'GO:0048856']	['JUNB', 'RPL13']
675	GO:BP	GO:0001823	mesonephros development	1	FALSE	"The process whose specific outcome is the progression of the mesonephros over time, from its formation to the mature structure. In mammals, the mesonephros is the second of the three embryonic kidneys to be established and exists only transiently. In lower vertebrates such as fish and amphibia, the mesonephros will form the mature kidney." [GOC:dph, ISBN:0124020607, ISBN:0721662544, PMID:1053531…	98	155	4	18123	0.0258065	0.0408163	FB3	['GO:0001822']	['BMP4', 'GREM1', 'HES1', 'MYC']
676	GO:BP	GO:0006086	acetyl-CoA biosynthetic process from pyruvate	1	FALSE	"The chemical reactions and pathways resulting in the formation of acetyl-CoA from pyruvate." [GOC:dph, GOC:go_curators, GOC:tb]	15	155	1	18123	0.00645161	0.0666667	FB3	['GO:0006085', 'GO:0006090']	['PDK4']
677	GO:BP	GO:0006082	organic acid metabolic process	1	FALSE	"The chemical reactions and pathways involving organic acids, any acidic compound containing carbon in covalent linkage." [ISBN:0198506732]	1098	155	11	18123	0.0709677	0.0100182	FB3	['GO:0044237', 'GO:0044281', 'GO:0071704']	['ALDOA', 'APOC1', 'DDIT4', 'FABP5', 'FGFR4', 'GAPDH', 'LDHB', 'MYC', 'PDK4', 'PON2', 'RBP1']
678	GO:BP	GO:0006085	acetyl-CoA biosynthetic process	1	FALSE	"The chemical reactions and pathways resulting in the formation of acetyl-CoA, a derivative of coenzyme A in which the sulfhydryl group is acetylated." [GOC:go_curators]	22	155	1	18123	0.00645161	0.0454545	FB3	['GO:0006084', 'GO:0071616']	['PDK4']
679	GO:BP	GO:0006084	acetyl-CoA metabolic process	1	FALSE	"The chemical reactions and pathways involving acetyl-CoA, a derivative of coenzyme A in which the sulfhydryl group is acetylated; it is a metabolite derived from several pathways (e.g. glycolysis, fatty acid oxidation, amino-acid catabolism) and is further metabolized by the tricarboxylic acid cycle. It is a key intermediate in lipid and terpenoid biosynthesis." [ISBN:0198547684]	38	155	1	18123	0.00645161	0.0263158	FB3	['GO:0006637']	['PDK4']
680	GO:BP	GO:0006096	glycolytic process	1	FALSE	"The chemical reactions and pathways resulting in the breakdown of a carbohydrate into pyruvate, with the concomitant production of a small amount of ATP and the reduction of NAD(P) to NAD(P)H. Glycolysis begins with the metabolism of a carbohydrate to generate products that can enter the pathway and ends with the production of pyruvate. Pyruvate may be converted to acetyl-coenzyme A, ethanol, la…	116	155	4	18123	0.0258065	0.0344828	FB3	['GO:0006090', 'GO:0006757', 'GO:0016052']	['ALDOA', 'DDIT4', 'GAPDH', 'MYC']
681	GO:BP	GO:0006112	energy reserve metabolic process	1	FALSE	"The chemical reactions and pathways by which a cell derives energy from stored compounds such as fats or glycogen." [GOC:mah]	91	155	1	18123	0.00645161	0.010989	FB3	['GO:0015980']	['MYC']
682	GO:BP	GO:0001886	endothelial cell morphogenesis	1	FALSE	"The change in form (cell shape and size) that occurs during the differentiation of an endothelial cell." [GOC:ascb_2009, GOC:dph, GOC:tb]	13	155	1	18123	0.00645161	0.0769231	FB3	['GO:0001885', 'GO:0003382']	['COL18A1']
683	GO:BP	GO:0001885	endothelial cell development	1	FALSE	"The progression of an endothelial cell over time, from its formation to the mature structure." [GOC:dph]	70	155	2	18123	0.0129032	0.0285714	FB3	['GO:0002064', 'GO:0045446']	['CLDN5', 'COL18A1']
684	GO:BP	GO:0001889	liver development	1	FALSE	"The process whose specific outcome is the progression of the liver over time, from its formation to the mature structure. The liver is an exocrine gland which secretes bile and functions in metabolism of protein and carbohydrate and fat, synthesizes substances involved in the clotting of the blood, synthesizes vitamin A, detoxifies poisonous substances, stores glycogen, and breaks down worn-out …	150	155	3	18123	0.0193548	0.02	FB3	['GO:0048732', 'GO:0061008']	['FRZB', 'HES1', 'MYC']
685	GO:BP	GO:0001843	neural tube closure	1	FALSE	"The last step in the formation of the neural tube, where the paired neural folds are brought together and fuse at the dorsal midline." [GOC:dph, ISBN:0878932437]	91	155	1	18123	0.00645161	0.010989	FB3	['GO:0014020', 'GO:0060606']	['BMP4']
686	GO:BP	GO:0001890	placenta development	1	FALSE	"The process whose specific outcome is the progression of the placenta over time, from its formation to the mature structure. The placenta is an organ of metabolic interchange between fetus and mother, partly of embryonic origin and partly of maternal origin." [GOC:add, ISBN:068340007X]	147	155	6	18123	0.0387097	0.0408163	FB3	['GO:0048513', 'GO:0048608']	['HES1', 'HEY1', 'HSP90AB1', 'JUNB', 'RPS6', 'SOCS3']
687	GO:BP	GO:0001841	neural tube formation	1	FALSE	"The formation of a tube from the flat layer of ectodermal cells known as the neural plate. This will give rise to the central nervous system." [GOC:dph, ISBN:0878932437]	105	155	1	18123	0.00645161	0.00952381	FB3	['GO:0001838', 'GO:0021915']	['BMP4']
688	GO:BP	GO:0006110	regulation of glycolytic process	1	FALSE	"Any process that modulates the frequency, rate or extent of glycolysis." [GOC:go_curators]	81	155	2	18123	0.0129032	0.0246914	FB3	['GO:0006096', 'GO:0042325', 'GO:0043467', 'GO:0043470', 'GO:1900542', 'GO:1903578']	['DDIT4', 'MYC']
689	GO:BP	GO:0001838	embryonic epithelial tube formation	1	FALSE	"The morphogenesis of an embryonic epithelium into a tube-shaped structure." [GOC:dph, ISBN:0824072820]	125	155	2	18123	0.0129032	0.016	FB3	['GO:0016331', 'GO:0072175']	['BMP4', 'GREM1']
690	GO:BP	GO:0001892	embryonic placenta development	1	FALSE	"The embryonically driven process whose specific outcome is the progression of the placenta over time, from its formation to the mature structure. The placenta is an organ of metabolic interchange between fetus and mother, partly of embryonic origin and partly of maternal origin." [GOC:add, ISBN:068340007X]	83	155	4	18123	0.0258065	0.0481928	FB3	['GO:0001701', 'GO:0001890', 'GO:0003006', 'GO:0048568']	['HES1', 'HEY1', 'JUNB', 'SOCS3']
691	GO:BP	GO:0001837	epithelial to mesenchymal transition	1	FALSE	"A transition where an epithelial cell loses apical/basolateral polarity, severs intercellular adhesive junctions, degrades basement membrane components and becomes a migratory mesenchymal cell." [GOC:dph, PMID:14701881]	160	155	4	18123	0.0258065	0.025	FB3	['GO:0048762']	['BMP4', 'DAG1', 'GREM1', 'HEY1']
692	GO:BP	GO:0001836	release of cytochrome c from mitochondria	1	FALSE	"The process that results in the movement of cytochrome c from the mitochondrial intermembrane space into the cytosol, which is part of the apoptotic signaling pathway and leads to caspase activation." [GOC:add, GOC:mah, GOC:mtg_apoptosis, ISBN:0721639976, PMID:12925707, PMID:9560217]	59	155	1	18123	0.00645161	0.0169492	FB3	['GO:0008637', 'GO:0097190']	['JUN']
693	GO:BP	GO:0001829	trophectodermal cell differentiation	1	FALSE	"The process in which a relatively unspecialized cell acquires the specialized features of a trophectoderm cell." [GOC:dph, ISBN:0124020607, ISBN:0198542771]	18	155	1	18123	0.00645161	0.0555556	FB3	['GO:0001825', 'GO:0030154']	['JUNB']
694	GO:BP	GO:0001932	regulation of protein phosphorylation	1	FALSE	"Any process that modulates the frequency, rate or extent of addition of phosphate groups into an amino acid in a protein." [GOC:hjd]	1246	155	20	18123	0.129032	0.0160514	FB3	['GO:0006468', 'GO:0031399', 'GO:0042325']	['APOE', 'ATF3', 'BMP4', 'CDKN1C', 'CXCR4', 'DAG1', 'DDIT4', 'EGR1', 'GADD45B', 'GREM1', 'HES1', 'HSP90AB1', 'MIR24-2', 'NPM1', 'RPS27A', 'RPS3', 'SERTAD1', 'SIRT2', 'SOCS3', 'TPD52L1']
695	GO:BP	GO:0006119	oxidative phosphorylation	1	FALSE	"The phosphorylation of ADP to ATP that accompanies the oxidation of a metabolite through the operation of the respiratory chain. Oxidation of compounds establishes a proton gradient across the membrane, providing the energy for ATP synthesis." [ISBN:0198506732, ISBN:0471331309]	151	155	2	18123	0.0129032	0.013245	FB3	['GO:0009060', 'GO:0046034']	['CHCHD10', 'MYC']
696	GO:BP	GO:0001894	tissue homeostasis	1	FALSE	"A homeostatic process involved in the maintenance of an internal steady state within a defined tissue of an organism, including control of cellular proliferation and death and control of metabolic function." [GOC:add, GOC:isa_complete]	272	155	2	18123	0.0129032	0.00735294	FB3	['GO:0048871', 'GO:0060249']	['CLDN5', 'PDK4']
697	GO:BP	GO:0006109	regulation of carbohydrate metabolic process	1	FALSE	"Any process that modulates the frequency, rate or extent of the chemical reactions and pathways involving carbohydrates." [GOC:go_curators]	215	155	4	18123	0.0258065	0.0186047	FB3	['GO:0005975', 'GO:0080090']	['DDIT4', 'MIDN', 'MYC', 'PDK4']
698	GO:BP	GO:0001906	cell killing	1	FALSE	"Any process in an organism that results in the killing of its own cells or those of another organism, including in some cases the death of the other organism. Killing here refers to the induction of death in one cell by another cell, not cell-autonomous death due to internal or other environmental conditions." [GOC:add]	196	155	5	18123	0.0322581	0.0255102	FB3	['GO:0009987']	['GAPDH', 'HLA-E', 'HMGN2', 'HSP90AB1', 'RPS19']
699	GO:BP	GO:0001909	leukocyte mediated cytotoxicity	1	FALSE	"The directed killing of a target cell by a leukocyte." [GO_REF:0000022, GOC:add, ISBN:0781735149, PMID:11911826]	113	155	1	18123	0.00645161	0.00884956	FB3	['GO:0001906', 'GO:0002443']	['HLA-E']
700	GO:BP	GO:0001910	regulation of leukocyte mediated cytotoxicity	1	FALSE	"Any process that modulates the frequency, rate, or extent of leukocyte mediated cytotoxicity." [GOC:add, ISBN:0781735149, PMID:11911826]	75	155	1	18123	0.00645161	0.0133333	FB3	['GO:0001909', 'GO:0002703', 'GO:0031341']	['HLA-E']
701	GO:BP	GO:0001911	negative regulation of leukocyte mediated cytotoxicity	1	FALSE	"Any process that stops, prevents, or reduces the rate of leukocyte mediated cytotoxicity." [GOC:add, ISBN:0781735149, PMID:11911826]	20	155	1	18123	0.00645161	0.05	FB3	['GO:0001909', 'GO:0001910', 'GO:0002704', 'GO:0031342']	['HLA-E']
702	GO:BP	GO:0001912	positive regulation of leukocyte mediated cytotoxicity	1	FALSE	"Any process that activates or increases the frequency, rate or extent of leukocyte mediated cytotoxicity." [GOC:add, ISBN:0781735149, PMID:11911826]	52	155	1	18123	0.00645161	0.0192308	FB3	['GO:0001909', 'GO:0001910', 'GO:0002705', 'GO:0031343']	['HLA-E']
703	GO:BP	GO:0001913	T cell mediated cytotoxicity	1	FALSE	"The directed killing of a target cell by a T cell through the release of granules containing cytotoxic mediators or through the engagement of death receptors." [GOC:add, GOC:pr, ISBN:0781735149, PMID:11911826]	42	155	1	18123	0.00645161	0.0238095	FB3	['GO:0001909', 'GO:0002456']	['HLA-E']
704	GO:BP	GO:0001914	regulation of T cell mediated cytotoxicity	1	FALSE	"Any process that modulates the frequency, rate, or extent of T cell mediated cytotoxicity." [GOC:add, ISBN:0781735149]	35	155	1	18123	0.00645161	0.0285714	FB3	['GO:0001910', 'GO:0001913', 'GO:0002709']	['HLA-E']
705	GO:BP	GO:0001916	positive regulation of T cell mediated cytotoxicity	1	FALSE	"Any process that activates or increases the frequency, rate or extent of T cell mediated cytotoxicity." [GOC:add, ISBN:0781735149]	26	155	1	18123	0.00645161	0.0384615	FB3	['GO:0001912', 'GO:0001913', 'GO:0001914', 'GO:0002711']	['HLA-E']
706	GO:BP	GO:0001819	positive regulation of cytokine production	1	FALSE	"Any process that activates or increases the frequency, rate or extent of production of a cytokine." [GOC:add, ISBN:0781735149]	498	155	5	18123	0.0322581	0.0100402	FB3	['GO:0001816', 'GO:0001817', 'GO:0010628', 'GO:0051240']	['EGR1', 'GAPDH', 'HLA-E', 'IL32', 'RPS3']
707	GO:BP	GO:0001893	maternal placenta development	1	FALSE	"Maternally driven process whose specific outcome is the progression of the placenta over time, from its formation to the mature structure. The placenta is an organ of metabolic interchange between fetus and mother, partly of embryonic origin and partly of maternal origin." [GOC:add, ISBN:068340007X]	35	155	1	18123	0.00645161	0.0285714	FB3	['GO:0001890', 'GO:0003006', 'GO:0048856', 'GO:0060135']	['JUNB']
708	GO:BP	GO:0001818	negative regulation of cytokine production	1	FALSE	"Any process that stops, prevents, or reduces the rate of production of a cytokine." [GOC:add, ISBN:0781735149]	385	155	6	18123	0.0387097	0.0155844	FB3	['GO:0001816', 'GO:0001817', 'GO:0010629', 'GO:0051241']	['BST2', 'HSP90AB1', 'MIR24-2', 'NDRG2', 'SERPINB1', 'ZFP36']
709	GO:BP	GO:0002688	regulation of leukocyte chemotaxis	1	FALSE	"Any process that modulates the frequency, rate, or extent of leukocyte chemotaxis." [GOC:add]	122	155	2	18123	0.0129032	0.0163934	FB3	['GO:0002685', 'GO:0030595', 'GO:0050920']	['CCL2', 'GREM1']
710	GO:BP	GO:0001816	cytokine production	1	FALSE	"The appearance of a cytokine due to biosynthesis or secretion following a cellular stimulus, resulting in an increase in its intracellular or extracellular levels." [GOC:add, ISBN:0781735149]	854	155	11	18123	0.0709677	0.0128806	FB3	['GO:0010467', 'GO:0032501']	['BST2', 'EGR1', 'GAPDH', 'HLA-E', 'HSP90AB1', 'IL32', 'MIR24-2', 'NDRG2', 'RPS3', 'SERPINB1', 'ZFP36']
711	GO:BP	GO:0001503	ossification	1	FALSE	"The formation of bone or of a bony substance, or the conversion of fibrous tissue or of cartilage into bone or a bony substance." [GOC:mtg_mpo, PMID:17572649]	418	155	9	18123	0.0580645	0.0215311	FB3	['GO:0032501']	['BMP4', 'FBL', 'GPM6B', 'GREM1', 'JUNB', 'KLF10', 'MYF5', 'NPPC', 'RSL1D1']
712	GO:BP	GO:0001504	neurotransmitter uptake	1	FALSE	"The directed movement of neurotransmitters into neurons or glial cells. This process leads to inactivation and recycling of neurotransmitters." [ISBN:0123668387]	44	155	1	18123	0.00645161	0.0227273	FB3	['GO:0001505', 'GO:0006836', 'GO:0098657']	['GPM6B']
713	GO:BP	GO:0001505	regulation of neurotransmitter levels	1	FALSE	"Any process that modulates levels of neurotransmitter." [GOC:jl]	221	155	1	18123	0.00645161	0.00452489	FB3	['GO:0065008']	['GPM6B']
714	GO:BP	GO:0001508	action potential	1	FALSE	"A process in which membrane potential cycles through a depolarizing spike, triggered in response to depolarization above some threshold, followed by repolarization. This cycle is driven by the flow of ions through various voltage gated channels with different thresholds and ion specificities." [GOC:dph, GOC:go_curators, GOC:tb, ISBN:978-0-07-139011-8]	137	155	1	18123	0.00645161	0.00729927	FB3	['GO:0042391']	['CHRNA1']
715	GO:BP	GO:0001510	RNA methylation	1	FALSE	"Posttranscriptional addition of a methyl group to either a nucleotide or 2'-O ribose in a polyribonucleotide. Usually uses S-adenosylmethionine as a cofactor." [GOC:hjd, PMID:21823225]	83	155	1	18123	0.00645161	0.0120482	FB3	['GO:0009451', 'GO:0043414']	['FBL']
716	GO:BP	GO:0001516	prostaglandin biosynthetic process	1	FALSE	"The chemical reactions and pathways resulting in the formation of prostaglandins, any of a group of biologically active metabolites which contain a cyclopentane ring." [GOC:ai]	33	155	1	18123	0.00645161	0.030303	FB3	['GO:0006693', 'GO:0046457']	['FABP5']
717	GO:BP	GO:0001523	retinoid metabolic process	1	FALSE	"The chemical reactions and pathways involving retinoids, any member of a class of isoprenoids that contain or are derived from four prenyl groups linked head-to-tail. Retinoids include retinol and retinal and structurally similar natural derivatives or synthetic compounds, but need not have vitamin A activity." [ISBN:0198506732]	107	155	3	18123	0.0193548	0.0280374	FB3	['GO:0016101']	['ALDH1A1', 'APOE', 'RBP1']
718	GO:BP	GO:0001525	angiogenesis	1	FALSE	"Blood vessel formation when new vessels emerge from the proliferation of pre-existing blood vessels." [ISBN:0878932453]	621	155	12	18123	0.0774194	0.0193237	FB3	['GO:0048514', 'GO:0048646']	['ANGPTL4', 'BMP4', 'BTG1', 'CCL2', 'CLDN5', 'COL18A1', 'CXCR4', 'DAG1', 'GREM1', 'HEY1', 'JUN', 'MIR24-2']
719	GO:BP	GO:0001541	ovarian follicle development	1	FALSE	"The process whose specific outcome is the progression of the ovarian follicle over time, from its formation to the mature structure." [https://www.ncbi.nlm.nih.gov/books/NBK279054/]	55	155	1	18123	0.00645161	0.0181818	FB3	['GO:0008585', 'GO:0048608']	['MYC']
720	GO:BP	GO:0006342	chromatin silencing	1	FALSE	"Repression of transcription by altering the structure of chromatin, e.g. by conversion of large regions of DNA into an inaccessible state often called heterochromatin." [GOC:mah, PMID:10219245]	75	155	1	18123	0.00645161	0.0133333	FB3	['GO:0016458', 'GO:0045814', 'GO:0045892', 'GO:0097549']	['SIRT2']
721	GO:BP	GO:0001556	oocyte maturation	1	FALSE	"A developmental process, independent of morphogenetic (shape) change, that is required for an oocyte to attain its fully functional state. Oocyte maturation commences after reinitiation of meiosis commonly starting with germinal vesicle breakdown, and continues up to the second meiotic arrest prior to fertilization." [GOC:devbiol, https://www.ncbi.nlm.nih.gov/books/NBK279054/]	27	155	2	18123	0.0129032	0.0740741	FB3	['GO:0003006', 'GO:0022412', 'GO:0048469', 'GO:0048599']	['NPPC', 'SIRT2']
722	GO:BP	GO:0001558	regulation of cell growth	1	FALSE	"Any process that modulates the frequency, rate, extent or direction of cell growth." [GOC:go_curators]	426	155	9	18123	0.0580645	0.0211268	FB3	['GO:0016049', 'GO:0040008', 'GO:0051128']	['APOE', 'BST2', 'BTG1', 'CXCR4', 'FRZB', 'GREM1', 'NET1', 'NPM1', 'SERTAD1']
723	GO:BP	GO:0006338	chromatin remodeling	1	FALSE	"Dynamic structural changes to eukaryotic chromatin occurring throughout the cell division cycle. These changes range from the local changes necessary for transcriptional regulation to global changes necessary for chromosome segregation." [GOC:jid, GOC:vw, PMID:12697820]	222	155	3	18123	0.0193548	0.0135135	FB3	['GO:0006325']	['MYC', 'NPM1', 'SIRT2']
724	GO:BP	GO:0006336	DNA replication-independent nucleosome assembly	1	FALSE	"The formation of nucleosomes outside the context of DNA replication." [GOC:mah]	53	155	1	18123	0.00645161	0.0188679	FB3	['GO:0006334', 'GO:0034724']	['NPM1']
725	GO:BP	GO:0006334	nucleosome assembly	1	FALSE	"The aggregation, arrangement and bonding together of a nucleosome, the beadlike structural units of eukaryotic chromatin composed of histones and DNA." [GOC:mah]	142	155	1	18123	0.00645161	0.00704225	FB3	['GO:0031497', 'GO:0034728', 'GO:0065004']	['NPM1']
726	GO:BP	GO:0006333	chromatin assembly or disassembly	1	FALSE	"The formation or destruction of chromatin structures." [GOC:mah]	219	155	2	18123	0.0129032	0.00913242	FB3	['GO:0006325']	['NPM1', 'SIRT2']
727	GO:BP	GO:0006325	chromatin organization	1	FALSE	"Any process that results in the specification, formation or maintenance of the physical structure of eukaryotic chromatin." [GOC:mah, GOC:vw, PMID:20404130]	839	155	6	18123	0.0387097	0.00715137	FB3	['GO:0016043', 'GO:0051276']	['FBL', 'HMGN2', 'MYC', 'NPM1', 'SERTAD1', 'SIRT2']
728	GO:BP	GO:0006323	DNA packaging	1	FALSE	"Any process in which DNA and associated proteins are formed into a compact, orderly structure." [GOC:mah, ISBN:0815316194]	246	155	2	18123	0.0129032	0.00813008	FB3	['GO:0071103']	['NPM1', 'SIRT2']
729	GO:BP	GO:0006306	DNA methylation	1	FALSE	"The covalent transfer of a methyl group to either N-6 of adenine or C-5 or N-4 of cytosine." [GOC:ems, ISBN:0198506732]	77	155	2	18123	0.0129032	0.025974	FB3	['GO:0006305', 'GO:0043414', 'GO:0044728']	['FOS', 'MYC']
730	GO:BP	GO:0006305	DNA alkylation	1	FALSE	"The addition of alkyl groups to many positions on all four bases of DNA. Alkylating agents can also modify the bases of incoming nucleotides in the course of DNA synthesis." [ISBN:0716735970]	77	155	2	18123	0.0129032	0.025974	FB3	['GO:0006304']	['FOS', 'MYC']
731	GO:BP	GO:0006304	DNA modification	1	FALSE	"The covalent alteration of one or more nucleotide sites in DNA, resulting in a change in its properties." [GOC:jl, GOC:ma]	145	155	2	18123	0.0129032	0.0137931	FB3	['GO:0006259', 'GO:0043412']	['FOS', 'MYC']
732	GO:BP	GO:0006348	chromatin silencing at telomere	1	FALSE	"Repression of transcription of telomeric DNA by altering the structure of chromatin." [PMID:10219245]	11	155	1	18123	0.00645161	0.0909091	FB3	['GO:0006342']	['SIRT2']
733	GO:BP	GO:0006351	transcription, DNA-templated	1	FALSE	"The cellular synthesis of RNA on a template of DNA." [GOC:jl, GOC:txnOH]	3713	155	37	18123	0.23871	0.00996499	FB3	['GO:0010467', 'GO:0034645', 'GO:0097659']	['ADIRF', 'APOE', 'ATF3', 'BMP4', 'BTG1', 'BTG2', 'CDKN1C', 'CHCHD10', 'CSRNP1', 'EGR1', 'FOS', 'FOSB', 'GREM1', 'HES1', 'HEY1', 'JUN', 'JUNB', 'KLF10', 'MAFF', 'MSC', 'MYC', 'MYF5', 'MYF6', 'NACA', 'NOTCH3', 'NPM1', 'PAX7', 'PITX2', 'RPL10', 'RPL6', 'RPS27A', 'RPS3', 'RXRG', 'SERTAD1', 'SIRT2', 'TGIF1', 'ZFP36']
734	GO:BP	GO:0001502	cartilage condensation	1	FALSE	"The condensation of mesenchymal cells that have been committed to differentiate into chondrocytes." [ISBN:0878932437]	22	155	1	18123	0.00645161	0.0454545	FB3	['GO:0048705', 'GO:0051216', 'GO:0098743']	['MYF5']
735	GO:BP	GO:0001501	skeletal system development	1	FALSE	"The process whose specific outcome is the progression of the skeleton over time, from its formation to the mature structure. The skeleton is the bony framework of the body in vertebrates (endoskeleton) or the hard outer envelope of insects (exoskeleton or dermoskeleton)." [GOC:dph, GOC:jid, GOC:tb]	509	155	8	18123	0.0516129	0.0157171	FB3	['GO:0048731']	['BMP4', 'CSRNP1', 'FRZB', 'GREM1', 'MYF5', 'NPPC', 'PITX2', 'RPL13']
736	GO:BP	GO:0000398	mRNA splicing, via spliceosome	1	FALSE	"The joining together of exons from one or more primary transcripts of messenger RNA (mRNA) and the excision of intron sequences, via a spliceosomal mechanism, so that mRNA consisting only of the joined exons is produced." [GOC:krc, ISBN:0198506732, ISBN:0879695897]	360	155	2	18123	0.0129032	0.00555556	FB3	['GO:0000377', 'GO:0006397']	['CIRBP', 'NPM1']
737	GO:BP	GO:0000462	maturation of SSU-rRNA from tricistronic rRNA transcript (SSU-rRNA, 5.8S rRNA, LSU-rRNA)	1	FALSE	"Any process involved in the maturation of a precursor Small SubUnit (SSU) ribosomal RNA (rRNA) molecule into a mature SSU-rRNA molecule from the pre-rRNA molecule originally produced as a tricistronic rRNA transcript that contains the Small Subunit (SSU) rRNA, 5.8S rRNA, and the Large Subunit (LSU) in that order from 5' to 3' along the primary transcript." [GOC:curators]	37	155	2	18123	0.0129032	0.0540541	FB3	['GO:0030490']	['RPS19', 'RPS8']
738	GO:BP	GO:0000463	maturation of LSU-rRNA from tricistronic rRNA transcript (SSU-rRNA, 5.8S rRNA, LSU-rRNA)	1	FALSE	"Any process involved in the maturation of a precursor Large SubUnit (LSU) ribosomal RNA (rRNA) molecule into a mature LSU-rRNA molecule from the pre-rRNA molecule originally produced as a tricistronic rRNA transcript that contains the Small Subunit (SSU) rRNA, 5.8S rRNA, and Large Subunit (LSU) in that order from 5' to 3' along the primary transcript." [GOC:curators]	15	155	1	18123	0.00645161	0.0666667	FB3	['GO:0000470']	['RPL7']
739	GO:BP	GO:0000494	box C/D RNA 3'-end processing	1	FALSE	"Any process involved in forming the mature 3' end of a box C/D RNA molecule." [GOC:krc]	3	155	1	18123	0.00645161	0.333333	FB3	['GO:0031126', 'GO:0034963']	['FBL']
740	GO:BP	GO:0006407	rRNA export from nucleus	1	FALSE	"The directed movement of rRNA from the nucleus to the cytoplasm; the rRNA is usually in the form of ribonucleoproteins." [GOC:ma, GOC:mah]	2	155	1	18123	0.00645161	0.5	FB3	['GO:0042254', 'GO:0051029', 'GO:0071428', 'GO:0097064']	['NPM1']
741	GO:BP	GO:0006405	RNA export from nucleus	1	FALSE	"The directed movement of RNA from the nucleus to the cytoplasm." [GOC:ma]	129	155	1	18123	0.00645161	0.00775194	FB3	['GO:0050658', 'GO:0051168']	['NPM1']
742	GO:BP	GO:0006403	RNA localization	1	FALSE	"A process in which RNA is transported to, or maintained in, a specific location." [GOC:ai]	222	155	3	18123	0.0193548	0.0135135	FB3	['GO:0033036']	['FBL', 'NPM1', 'ZFP36']
743	GO:BP	GO:0000715	nucleotide-excision repair, DNA damage recognition	1	FALSE	"The identification of lesions in DNA, such as pyrimidine-dimers, intrastrand cross-links, and bulky adducts. The wide range of substrate specificity suggests the repair complex recognizes distortions in the DNA helix." [GOC:elh, PMID:10197977]	23	155	1	18123	0.00645161	0.0434783	FB3	['GO:0006289', 'GO:0051276']	['RPS27A']
744	GO:BP	GO:0000717	nucleotide-excision repair, DNA duplex unwinding	1	FALSE	"The unwinding, or local denaturation, of the DNA duplex to create a bubble around the site of the DNA damage." [GOC:elh, PMID:10197977]	22	155	1	18123	0.00645161	0.0454545	FB3	['GO:0006289', 'GO:0032508']	['RPS27A']
745	GO:BP	GO:0000723	telomere maintenance	1	FALSE	"Any process that contributes to the maintenance of proper telomeric length and structure by affecting and monitoring the activity of telomeric proteins, the length of telomeric DNA and the replication and repair of the DNA. These processes includes those that shorten, lengthen, replicate and repair the telomeric DNA sequences." [GOC:BHF, GOC:BHF_telomere, GOC:elh, GOC:rl, PMID:11092831]	169	155	2	18123	0.0129032	0.0118343	FB3	['GO:0006259', 'GO:0032200', 'GO:0060249']	['HSP90AB1', 'MYC']
746	GO:BP	GO:0001570	vasculogenesis	1	FALSE	"The differentiation of endothelial cells from progenitor cells during blood vessel development, and the de novo formation of blood vessels and tubes." [PMID:8999798]	84	155	2	18123	0.0129032	0.0238095	FB3	['GO:0030154', 'GO:0048514']	['HEY1', 'JUNB']
747	GO:BP	GO:0006397	mRNA processing	1	FALSE	"Any process involved in the conversion of a primary mRNA transcript into one or more mature mRNA(s) prior to translation into polypeptide." [GOC:mah]	532	155	2	18123	0.0129032	0.0037594	FB3	['GO:0006396', 'GO:0016071']	['CIRBP', 'NPM1']
748	GO:BP	GO:0000902	cell morphogenesis	1	FALSE	"The developmental process in which the size or shape of a cell is generated and organized." [GOC:clt, GOC:dph, GOC:go_curators, GOC:tb]	1045	155	13	18123	0.083871	0.0124402	FB3	['GO:0009653']	['ALDOA', 'APOE', 'CCL2', 'CHODL', 'COL18A1', 'CXCR4', 'DAG1', 'GREM1', 'HES1', 'HSP90AB1', 'NOTCH3', 'RPL24', 'TUBB2B']
749	GO:BP	GO:0006390	mitochondrial transcription	1	FALSE	"The synthesis of RNA from a mitochondrial DNA template, usually by a specific mitochondrial RNA polymerase." [GOC:jl]	17	155	1	18123	0.00645161	0.0588235	FB3	['GO:0000959', 'GO:0006351', 'GO:0140053']	['CHCHD10']
750	GO:BP	GO:0000904	cell morphogenesis involved in differentiation	1	FALSE	"The change in form (cell shape and size) that occurs when relatively unspecialized cells, e.g. embryonic or regenerative cells, acquire specialized structural and/or functional features that characterize the cells, tissues, or organs of the mature organism or some other relatively stable phase of the organism's life history." [GOC:go_curators]	754	155	10	18123	0.0645161	0.0132626	FB3	['GO:0000902', 'GO:0048468']	['APOE', 'CHODL', 'COL18A1', 'CXCR4', 'DAG1', 'HES1', 'HSP90AB1', 'NOTCH3', 'RPL24', 'TUBB2B']
751	GO:BP	GO:0006367	transcription initiation from RNA polymerase II promoter	1	FALSE	"Any process involved in the assembly of the RNA polymerase II preinitiation complex (PIC) at an RNA polymerase II promoter region of a DNA template, resulting in the subsequent synthesis of RNA from that promoter. The initiation phase includes PIC assembly and the formation of the first few bonds in the RNA chain, including abortive initiation, which occurs when the first few nucleotides are rep…	227	155	2	18123	0.0129032	0.00881057	FB3	['GO:0006352', 'GO:0006366']	['NOTCH3', 'RXRG']
752	GO:BP	GO:0006366	transcription by RNA polymerase II	1	FALSE	"The synthesis of RNA from a DNA template by RNA polymerase II (RNAP II), originating at an RNA polymerase II promoter. Includes transcription of messenger RNA (mRNA) and certain small nuclear RNAs (snRNAs)." [GOC:jl, GOC:txnOH, ISBN:0321000382]	2729	155	32	18123	0.206452	0.0117259	FB3	['GO:0006351']	['ADIRF', 'APOE', 'ATF3', 'BMP4', 'BTG2', 'CSRNP1', 'EGR1', 'FOS', 'FOSB', 'GREM1', 'HES1', 'HEY1', 'JUN', 'JUNB', 'KLF10', 'MAFF', 'MSC', 'MYC', 'MYF5', 'MYF6', 'NACA', 'NOTCH3', 'NPM1', 'PAX7', 'PITX2', 'RPL10', 'RPS27A', 'RXRG', 'SERTAD1', 'SIRT2', 'TGIF1', 'ZFP36']
753	GO:BP	GO:0000959	mitochondrial RNA metabolic process	1	FALSE	"The chemical reactions and pathways involving RNA transcribed from the mitochondrial genome and occurring in the mitochondrion." [GOC:krc, GOC:mah]	49	155	1	18123	0.00645161	0.0204082	FB3	['GO:0016070']	['CHCHD10']
754	GO:BP	GO:0006357	regulation of transcription by RNA polymerase II	1	FALSE	"Any process that modulates the frequency, rate or extent of transcription mediated by RNA polymerase II." [GOC:go_curators, GOC:txnOH]	2567	155	32	18123	0.206452	0.0124659	FB3	['GO:0006355', 'GO:0006366']	['ADIRF', 'APOE', 'ATF3', 'BMP4', 'BTG2', 'CSRNP1', 'EGR1', 'FOS', 'FOSB', 'GREM1', 'HES1', 'HEY1', 'JUN', 'JUNB', 'KLF10', 'MAFF', 'MSC', 'MYC', 'MYF5', 'MYF6', 'NACA', 'NOTCH3', 'NPM1', 'PAX7', 'PITX2', 'RPL10', 'RPS27A', 'RXRG', 'SERTAD1', 'SIRT2', 'TGIF1', 'ZFP36']
[truncated: 10,236 more rows]
