# Supplementary material for: Role of distinct fibroblast lineages and immune cells in dermal repair following UV radiation-induced tissue damage
Source: eLife journal article supplement (doi:10.7554/elife.71052), 2021-12-23
Supplement: supp [file Figure S2G - GO enrichment analysis human upper&lower dermis.xlsx]

## Sheet: Summary
			Summary of selected GO terms (p-value log10) from human dermis
				Upper dermis	Lower dermis
			lipid biosynthetic process	0	13.92
			steroid biosynthetic process	0	6.53
			cellular response to interferon-gamma	2.98	0
			cellular response to chemokine	1.35	0
			regulation of apoptotic process	0	0
			response to oxidative stress	0	0
			response to stress	0	0
			DNA repair	0	0
			DNA damage response	0	0
			cellular response to UV	0	0
			response to UV	0	0

## Sheet: GSE109822_dermis
gene	papillary 1	reticular 1	papillary 2	reticular 2	papillary 3	reticular 3
A1BG	0.0610522	0.0865458	0.181471	0.0486155	0.0986628	0.0581175
A1BG-AS1	0.165894	0.171971	0.126115	0.0515333	0.124164	0.0232451
A1CF	0.000377352	0.0128041	0.0563852	0.0439712	0.0042461	0.0288594
A2M	31.046	22.0576	13.5757	19.3115	14.2008	10.4483
A2M-AS1	1.07739	0.881993	0.581282	0.6856	0.650868	0.490992
A2ML1	0.060888	0.106034	0.613083	0.872198	0.258288	0.422992
A2MP1	0.0671051	0.0933188	0.138954	0.0340905	0.0617916	0.053759
A3GALT2	0.0216117	0.0111985	0.0190748	0.0112672	0.0374367	0
A4GALT	0.178048	0.131684	0.266314	0.124515	0.0954307	0.104021
A4GNT	0.0326573	0.0278166	0.155595	0.089171	0.0123862	0.0384121
AA06	0	0	0	0	0	0
AAAS	1.75019	1.65477	1.66312	2.09756	1.67666	1.58642
AACS	0.188169	0.495494	1.04776	1.1988	0.545188	1.80947
AACSP1	0.0134439	0	0.14131	0.0212486	0.0345432	0.0677972
AADAC	0.0264941	0.0250441	0.138189	0.00963136	0.0395481	0.427686
AADACL2	0.267076	0.096372	0.152997	0.477808	0.0604578	0.212025
AADACL2-AS1	0.0630761	0.0321319	0.0564981	0.0168905	0.0562413	0.0672196
AADACL3	0.0334204	0.0100983	0.563944	1.59587	0.044353	0.46622
AADACL4	0	0.0127625	0.142316	0.0168824	0.00111267	0.0176705
AADACP1	0.051613	0.0545392	0.0534612	0.0647544	0.0433683	0.0519418
AADAT	0.107178	0.11357	0.0512696	0.0704414	0.0677349	0.055318
AAED1	0.494727	0.254245	0.336043	0.191853	0.309551	0.213495
AAGAB	0.999186	0.857324	0.795535	1.07062	0.648028	0.98348
AAK1	0.0938291	0.195366	0.359014	0.16313	0.171721	0.110478
AAMDC	4.57333	4.16127	4.15914	3.03949	4.02623	4.40825
AAMP	1.68548	2.2399	2.19601	2.31829	2.41507	2.41178
AANAT	0	0.0918492	0.163625	0.0432429	0.012149	0
AAR2	1.5902	1.08486	1.02435	1.77382	0.784672	0.965049
AARD	0.0189024	0.036401	0.0484466	0.0292631	0.0922296	0.167521
AARS	1.83554	2.05492	1.73055	1.56432	2.06007	1.75595
AARS2	0.158356	0.0991632	0.125195	0.242442	0.168436	0.133241
AARSD1	1.86006	1.59402	1.91506	1.38027	1.50256	0
AASDH	0.603949	0.700411	0.676495	0.472686	0.884557	0.441204
AASDHPPT	1.31627	1.22152	1.16397	1.46639	1.52868	1.76585
AASS	1.33175	1.89842	0.882054	0.703846	1.1813	0.912307
AATF	0.382347	0.639815	0.67443	0.461199	0.712883	0
AATK	0.0138028	0.00600297	0.0217932	0.00960617	0.0264007	0
AATK-AS1	0	0	0	0	0	0
ABAT	0.0518336	0.111713	0.329571	0.0779534	0.0858359	0.109185
ABCA1	3.46456	3.66466	2.40637	2.59708	2.69452	3.08938
ABCA10	0.222968	0.519748	0.334312	0.196205	0.34652	0
ABCA11P	1.71665	1.0724	1.27839	1.22137	1.12561	1.2403
ABCA12	0.0461079	0.0804532	0.220918	0.250346	0.107824	0.192093
ABCA13	0.0427208	0.0427947	0.281378	0.107183	0.0268642	0.110144
ABCA17P	0.0115532	0.00850051	0.362988	0.018957	0.0294476	0.043347
ABCA2	0.0703637	0.0330831	0.0870754	0.0322984	0.0227891	0.0284243
ABCA3	0.0492633	0.0852267	0.213101	0.164218	0.117685	0.130559
ABCA4	0.0636289	0.127823	0.302208	0.489224	0.103693	0.215513
ABCA5	0.893078	0.977936	0.503612	0.802026	0.932531	0
ABCA6	1.18506	1.88559	0.792299	1.08102	1.04374	0
ABCA7	0.063607	0.0792865	0.158975	0.147681	0.0774949	0.0604016
ABCA8	1.32081	1.61745	1.40452	1.43669	1.55044	0
ABCA9	0.439145	0.481871	0.432001	0.476976	0.545348	0
ABCB1	1.05225	1.04578	0.413753	0.346961	0.384807	0.195668
ABCB10	0.197555	0.186347	0.239863	0.193828	0.174188	0.159877
ABCB11	0.015528	0.022123	0.144102	0.0267773	0	0.0464546
ABCB4	0.398946	0.337006	0.495266	0.172481	0.21488	0.139076
ABCB5	0.0365927	0.0221013	0.0968743	0.134063	0.0443189	0.267211
ABCB6	0.258865	0.315682	0.359085	0.212049	0.215624	0.292688
ABCB7	1.17193	0.957871	0.910734	1.10153	0.951697	1.13854
ABCB8	0.056764	0.0896331	0.167981	0.0427855	0.0752995	0.0977892
ABCB9	0.0165541	0.0551545	0.242587	0.0307463	0.0595338	0.0263546
ABCC1	0.421017	0.45811	0.671526	0.533865	0.448717	0.45938
ABCC10	0.0618894	0.10508	0.244307	0.125063	0.173913	0.0984514
ABCC11	0.0272213	0.0221013	0.317846	0.0142146	0	0.0509915
ABCC12	0.0167533	0	0.120602	0.00758377	0.0560156	0.032155
ABCC13	0.00841995	0.00181174	0.0646081	0.0370807	0.00624487	0.021693
ABCC2	0.0348742	0.083305	0.165718	0.0210083	0.0315841	0.0833155
ABCC3	0.0857476	0.0913119	0.547618	0.243709	0.121185	0
ABCC4	0.179002	0.113726	0.167981	0.0612819	0.086832	0.0869648
ABCC5	0.437362	0.777245	0.348884	0.353863	0.373467	0.464007
ABCC5-AS1	0.0367158	0.00864402	0.0498405	0.0123832	0.000488128	0
ABCC6	0.0342054	0.0740886	0.237462	0.0478074	0.062884	0.095932
ABCC6P1	0.0351536	0.0358615	0.173724	0.036873	0.0506592	0.0279802
ABCC6P2	0	0.0301583	0.00811404	0	0.0141628	0.00446221
ABCC8	0.0706115	0.0596542	0.397738	0.126028	0.0598723	0.0374193
ABCC9	0.900689	1.06436	0.657278	0.697507	0.775274	0.929449
ABCD1	0.0302592	0.00222188	0.0125647	0.0162161	0.0158579	0.00223111
ABCD2	0.0834074	0.0750645	0.0539016	0.024216	0.0598112	0.016232
ABCD3	0.20199	0.268392	0.375192	0.486002	0.331348	0.646397
ABCD4	1.69237	2.3905	1.65352	1.23781	1.30514	0.800046
ABCE1	1.25562	0.62794	0.941973	1.01905	0.803939	0.708797
ABCF1	0.273826	0.197318	0.2891	0.177836	0.184449	0.181712
ABCF2	1.28896	0.955409	1.10316	1.35467	1.01108	1.02412
ABCF3	0.518385	1.23662	1.13123	1.2182	0.979775	1.08104
ABCG1	0.557201	0.528511	0.316783	0.381735	0.314676	0.268585
ABCG2	0.188474	0.21102	0.176067	0.156989	0.122871	0.0824984
ABCG4	0.0120922	0	0.0880031	0	0.00496133	0.00579013
ABCG5	0.0683631	0.218239	0.311226	0.123223	0.0381402	0.062131
ABCG8	0	0.030784	0.0802986	0.0142269	0	0.0229024
ABHD1	0.0246094	0.0233885	0.0879633	0.0163404	0.0366462	0.0434486
ABHD10	0.0902491	0.461134	0.368126	0.13128	0.502415	0.280404
ABHD11	0.179592	0.110888	0.178427	0.141302	0.250972	0.267236
ABHD11-AS1	0.0647978	0.0471958	0.116295	0.132804	0.0317627	0.014012
ABHD12	0.184705	0.370162	0.577278	0.41054	0.56718	0.419641
ABHD12B	0.0473333	0.0441026	0.269739	0.13928	0.0372687	0.296116
ABHD13	0.0832134	0.0562415	0.068934	0.092896	0.0908591	0.0795341
ABHD14A	0.297056	0.433666	0.734123	0.196133	0.330309	0.379562
ABHD14A-ACY1	0.616849	0.559217	0.963352	1.19945	0.664255	0.906931
ABHD14B	0.50961	0.869737	1.10378	0.514134	0.943681	0.761841
ABHD15	0.124518	0.147151	0.203227	0.140011	0.12051	0
ABHD16A	0.0394463	0.097524	0.142475	0.094632	0.086941	0.0775006
ABHD16B	0.00155364	0	0.00582055	0.00657895	0.00275122	0.00690601
ABHD17A	0.0378108	0.0122067	0.0143573	0.0158413	0.0253356	0.0198654
ABHD17B	0.114584	0.179165	0.147829	0.108811	0.195095	0.135004
ABHD17C	0.029402	0.0828912	0.117012	0.0603754	0.144594	0.249944
ABHD2	0.673263	0.435244	0.466864	0.472746	0.412875	0.419258
ABHD3	0.104852	0.29107	0.185507	0.153612	0.326539	0.237082
ABHD4	0.991709	1.50755	0.9906	0.972008	1.23985	1.28661
ABHD5	0.41552	0.612392	1.26999	2.29922	1.23071	1.80175
ABHD6	0.144293	0.167322	0.470775	0.749695	0.294171	0.504358
ABHD8	0.00950706	0.0202339	0.0265578	0.019777	0.00536175	0.00924499
ABI1	3.44323	3.26463	2.94524	4.79284	4.1667	3.92133
ABI2	0.358105	0.465745	0.322919	0.229263	0.39209	0.297488
ABI3	0.0830853	0.119433	0.145052	0.0124403	0.105136	0
ABI3BP	14.6917	8.98946	6.47743	8.7016	5.80708	7.12431
ABL1	0.556422	0.393187	0.539732	0.466341	0.231343	0.221916
ABL2	0.377458	0.160853	0.238397	0.320667	0.176949	0.312964
ABLIM1	1.67771	2.4179	2.96044	5.66107	2.66831	4.19477
ABLIM2	0.124666	0.244448	0.200742	0.116626	0.0913178	0.056302
ABLIM3	0.710251	0.840522	0.678702	0.545792	0.971101	0.580995
ABO	0.105546	0.0765046	0.335962	0.0719626	0.231898	0.440576
ABR	0.319099	0.321798	0.375136	0.160607	0.247955	0.266746
ABRA	0.0477493	0.026513	0.0188483	0.0417106	0.00631636	0.00405662
ABRACL	2.46229	1.3311	3.25039	6.11782	3.56878	3.92783
ABT1	1.37048	1.85805	1.6799	1.53486	1.27734	1.54321
ABTB1	0.0711734	0.540206	0.421491	0.0841884	0.403715	0.269966
ABTB2	0.0560038	0.0584556	0.0820741	0.135884	0.154828	0.212586
ACAA1	0.574933	0.561355	1.09624	0.555341	0.792033	1.32249
ACAA2	1.11644	2.89169	3.57494	3.7562	2.66612	5.26309
ACACA	0.188474	0.138615	0.320644	0.354504	0.182187	0
ACACB	0.357621	0.814424	0.586563	0.401762	0.540827	0.662929
ACAD10	0.164654	0.287976	0.292741	0.18162	0.208766	0.258479
ACAD11	0.661785	0.512629	0.5232	0.580989	0.479728	0.479135
ACAD8	0.150558	0.186558	0.428177	0.320039	0.298752	0.557823
ACAD9	0.272023	0.38733	0.653562	0.70786	0.616621	0.666516
ACADL	0.0594893	0.0994559	0.140402	0.133953	0.170936	0.0463937
ACADM	1.60226	1.87811	3.30371	4.57262	2.45574	5.22441
ACADS	0.0246587	0.100196	0.0258432	0.0513698	0.0388861	0.0621109
ACADSB	0.892002	0.687802	0.737843	0.93837	1.05467	1.03656
ACADVL	1.6801	2.21194	2.7336	3.18623	2.61365	3.26614
ACAN	0.173793	0.121736	0.380394	0.216404	0.264969	0.031541
ACAP1	0.541001	0.6263	0.48413	0.224203	0.241768	0.190727
ACAP2	0.470957	0.512054	0.745497	0.347225	0.442303	0.415253
ACAP3	0.0150779	0.0217908	0.0694374	0.0336333	0.0267309	0.0300593
ACAT1	0.924384	1.76803	1.98245	1.11149	2.40791	2.63734
ACAT2	1.22761	1.87642	6.24086	13.513	2.56934	11.8257
ACBD3	0.975515	0.640714	0.924505	0.932057	0.801989	0.753012
ACBD4	0.0196773	0.0588727	0.122075	0.130539	0.0495851	0
ACBD5	0.706574	0.932895	0.565735	0.524292	1.22082	0.736206
ACBD6	0.660246	0.564965	0.647516	0.495583	0.70897	0.535057
ACBD7	0.0150779	0.0765046	0.03568	0.06054	0.0751717	0.0231918
ACCS	0.492157	0.694567	1.02786	0.586961	0.53694	0.70103
ACCSL	0.01077	0.0172269	0.126902	0.0212971	0.0233743	0
ACD	0.157038	0.15637	0.252674	0.245747	0.228588	0.134706
ACE	0.0759109	0.0829127	0.250216	0.0764293	0.0563385	0
ACE2	0.0394346	0.0224413	0.0830116	0.0589694	0.0344376	0.0489945
ACER1	0.119995	0.201582	1.33411	1.50873	0.143988	0.873344
ACER2	0.0252939	0.0335681	0.0384564	0.0500707	0.0645496	0.071221
ACER3	0.133409	0.123409	0.176472	0.13709	0.148961	0.118106
ACHE	0.0403216	0.0430394	0.0174412	0.0156144	0	0.0111897
ACIN1	2.06229	1.72814	0.982648	1.47769	1.44093	0.94906
ACKR1	30.6237	28.8783	24.573	25.7088	17.4634	11.2953
ACKR2	0.292126	0.0616706	0.197988	0.44644	0.129087	0.355435
ACKR3	5.52642	3.59161	3.47628	9.05719	2.89836	9.05068
ACKR4	0.553554	0.472936	0.450014	0.242738	0.237504	0.593283
ACLY	1.08923	1.34519	1.8169	2.32503	1.51804	0
ACMSD	0.116132	0.0435226	0.100176	0.0412187	0.0619766	0.0899599
ACN9	0.649214	0.747832	0.785332	0.547356	0.923435	1.14854
ACO1	0.171155	0.404816	1.06277	0.78614	0.418777	1.00446
ACO2	1.43264	1.45457	1.50245	1.90029	1.83067	1.92662
ACOT1	0.159846	0.281845	0.833609	0.506464	0.331125	1.0418
ACOT11	0.0210323	0.127475	0.229549	0.183288	0.0376807	0.146046
ACOT12	0.0303354	0.0207655	0.108381	0.0164256	0.0289421	0.0130472
ACOT13	1.67031	1.37501	2.0141	2.04355	1.66773	3.22001
ACOT2	0.284834	0.412296	0.688682	0.522994	0.37339	0.874075
ACOT4	0.012033	0.0559613	0.098026	0.0410062	0.0417737	0.116488
ACOT6	0.00460395	0.010442	0	0.0352572	0.0176262	0.00216979
ACOT7	0.92766	0.55141	1.00746	0.439522	0.463618	0.607167
ACOT8	0.430456	0.621766	0.543966	0.607418	0.459789	0.502381
ACOT9	0.749743	1.65748	1.96595	1.12159	1.62193	1.75066
ACOX1	0.700326	0.657939	0.828047	1.15921	0.726586	0
ACOX2	0.785393	1.14621	1.20479	1.98189	0.794015	1.63261
ACOX3	0.249624	0.220294	0.259537	0.396384	0.171057	0.241789
ACOXL	0.00925577	0.0126928	0.248333	0.0307151	0	0.0144593
ACP1	3.43614	2.57242	3.31983	2.86857	3.12062	3.24119
ACP2	0.178168	0.414429	0.596003	0.370823	0.391942	0.382364
ACP5	0.71113	0.654637	1.42722	0.559331	0.376872	1.06653
ACP6	0.109179	0.0645219	0.308328	0.161106	0.140683	0.315064
ACPP	0.130337	0.107266	0.472881	0.845814	0.214903	0.133256
ACPT	0	0.033708	0.194603	0.123584	0.016638	0
ACR	0.0116699	0.0100272	0	0	0	0.00480705
ACRBP	0.233917	0.20165	0.217083	0.122117	0.0332008	0.0335152
ACRC	0.0391556	0.122941	0.187257	0.106937	0.0865958	0.0324119
ACRV1	0	0.00747045	0.0515344	0.0204768	0.0530491	0.0346108
ACSBG1	0.123705	0.325035	1.93066	3.35384	0.573591	3.49717
ACSBG2	0.0538103	0.0506387	0.2732	0.0960864	0.0343045	0.0449834
ACSF2	0.132726	0.214615	0.373912	0.442611	0.234693	0
ACSF3	0.0434468	0.0922874	0.0934185	0.0279954	0.0591753	0.056341
ACSL1	0.497311	0.560612	5.37232	11.7626	2.0131	9.80979
ACSL3	0.296928	0.356363	0.461907	0.415446	0.709928	0.756032
ACSL4	0.338033	0.459802	0.465852	0.547057	0.473263	0.585846
ACSL5	0.901992	0.554583	0.803791	1.23809	0.344326	0.493675
ACSL6	0.082091	0.0780518	0.197601	0.112465	0.104078	0.0500158
ACSM1	0.0919755	0.0591715	0.165655	0.121202	0.0303418	0.107728
ACSM2A	0.0255022	0.113099	0.240557	0.0474604	0.0400916	0.0450929
ACSM2B	0.0215567	0.0335345	0.124909	0.131674	0.0403421	0.0419258
ACSM3	0.134933	0.0808361	0.670775	0.986297	0.297868	1.09053
ACSM4	0.0333001	0.0381289	0.204664	0.156586	0.0469463	0.0316574
ACSM5	0.438018	0.192702	0.493381	0.158236	0.305527	0.33272
ACSM6	0.0999573	0.0521622	0.332288	0.269202	0.12303	0.34987
ACSS1	0.177426	0.200319	0.206783	0.204018	0.156068	0.208874
ACSS2	0.496064	0.516197	0.933234	1.31515	0.598996	1.80305
ACSS3	0.179578	0.204012	0.165248	0.172223	0.14058	0.207169
ACTA1	0.00839726	1.18321	1.17317	0.141943	1.29931	0.293207
ACTA2	38.3615	62.7663	52.1259	46.0553	70.9038	44.8603
ACTA2-AS1	13.6216	21.4129	17.7195	16.2902	24.4358	15.7003
ACTB	77.7057	68.334	86.0891	68.388	68.0066	81.2504
ACTBL2	0.105389	0.465259	0.532912	0.301698	0.553062	0.352577
ACTC1	5.25232	12.3489	11.6097	8.32658	13.6539	8.54727
ACTG1	37.341	38.9114	53.1453	56.5308	49.7841	0
ACTG1P4	0.0852668	0.062932	0.110775	0.116577	0.0938793	0.126892
ACTG2	0.398356	28.3726	30.8919	10.7995	29.5864	15.0166
ACTL10	0.00139032	0.00291985	0	0	0.00474456	0.00280318
ACTL6A	1.65103	1.4431	1.18357	1.66363	1.6411	2.08734
ACTL6B	0	0	0.1366	0.0138605	0.0117843	0.0187862
ACTL7A	0.0274423	0	0.0145453	0.00657699	0.00150048	0
ACTL7B	0	0	0.0193595	0.00269999	0	0.00202021
ACTL8	0	0.00195833	0.0537055	0.0016687	0	0
ACTL9	0.000862198	0	0.00756915	0	0.0119869	0.00776019
ACTN1	0.421374	0.611045	0.813441	0.568822	0.850938	0.625446
ACTN1-AS1	0	0.00170664	0.075358	0.00203496	0.0626912	0
ACTN2	0.0697948	0.189547	0.182077	0.0297163	0.0375012	0.0293655
ACTN3	0.0538993	0.0712284	0.157859	0.0344452	0.0178569	0.0494975
ACTN4	1.04777	1.48033	1.33777	1.34947	1.60237	1.24791
ACTR10	1.85149	2.05899	1.76854	2.12579	1.64055	2.21804
ACTR1A	1.59117	1.23225	1.39205	2.03423	1.47151	1.83854
ACTR1B	0.358699	0.608668	0.440119	0.297058	0.668135	0.460504
ACTR2	4.21546	2.6145	2.66962	3.17346	2.45546	2.36484
ACTR3	0.665943	1.66325	1.95772	1.1968	1.8196	1.44422
ACTR3B	0.0690609	0.157291	0.463264	0.897049	0.655266	1.02226
ACTR3BP2	0	0	0.0190637	0.00872129	0.0026031	0.0211376
ACTR3BP5	0.00170486	0	0.013715	0.0179228	0.00228485	0.0175384
ACTR3C	0.0409059	0.0400586	0.37712	0.116315	0.0762255	0.073561
ACTR5	0.0651866	0.133452	0.253963	0.123697	0.0761301	0.116475
ACTR6	0.72353	0.830568	0.784152	0.676101	0.862371	1.04862
ACTR8	0.479496	0.515554	0.86621	0.596284	0.600702	0.522867
ACTRT1	0	0	0.0322592	0	0	0.0150597
ACTRT2	0	0	0.00334399	0	0	0
ACTRT3	0.00978799	0.0227371	0.0163058	0	0.0836732	0.0349531
ACVR1	0.626452	0.371737	0.424145	0.395011	0.470593	0.496971
ACVR1B	0.0992319	0.108126	0.173321	0.118938	0.113887	0.208847
ACVR1C	0.00653057	0.0246404	0.0656709	0.0196558	0.0178985	0.0529572
ACVR2A	2.82561	3.6971	1.54092	1.5053	3.08956	2.12852
ACVR2B	0.0542836	0.0939787	0.0522068	0.0703396	0.149674	0.0703699
ACVR2B-AS1	0.00835149	0.00448103	0.0186038	0.00707539	0.013275	0.0279072
ACVRL1	0.707383	0.889628	0.702989	0.516299	0.469084	0.322157
ACY1	0.616849	0.559217	0.963352	1.19945	0.734177	0.906931
ACY3	0	0	0.0506388	0.00703679	0.0313215	0.0321711
ACYP1	2.34651	1.3067	1.51377	1.64082	2.0301	2.82378
ACYP2	0.168462	0.250796	0.367679	0.543622	0.47529	0.509312
ADA	0.330975	0.284006	0.475071	0.524989	0.431046	0.514209
ADAD1	0	0.0180011	0.0763352	0.0250057	0.048444	0.0601329
ADAD2	0	0	0.0538859	0.0353984	0.00696956	0.026558
ADAL	0.363961	0.516747	0.666806	0.475928	0.613282	0.447049
ADAM10	1.09483	1.01772	0.681517	0.84246	0.835439	0.749589
ADAM11	0.0475939	0.0153009	0.200004	0.015135	0.00943331	0
ADAM12	0.0329941	0.0546628	0.134917	0.117331	0.0706767	0.0336244
ADAM15	0.395927	0.317168	0.732904	0.435668	0.3112	0.264875
ADAM17	1.84948	1.54839	0.953567	1.65227	1.14143	1.1193
ADAM18	0	0.0335825	0.0219106	0.00551111	0.0200152	0.0182728
ADAM19	0.528388	0.490841	0.304845	0.43094	0.335841	0.240757
ADAM1A	0.0896341	0.103136	0.0512133	0.0783716	0.0631724	0.0108343
ADAM2	0.0156505	0.0253724	0.38391	0.0515923	0.0261439	0.0142121
ADAM20	0	0.00572911	0.0479103	0.00117645	0.0267163	0.00539653
ADAM20P1	0.0114255	0.0242311	0.00597041	0.00672144	0.010996	0.00375165
ADAM21	0.0176902	0	0.0117341	0.0134599	0.00293984	0
ADAM21P1	0.00363519	0	0	0.00268131	0.00183435	0
ADAM22	0.0762072	0.103575	0.135443	0.11078	0.0566382	0.0517164
ADAM23	0.0830765	0.101369	0.110757	0.175708	0.0905915	0.0521852
ADAM28	0.533806	0.219002	0.297725	0.178068	0.176483	0.104994
ADAM29	0.00489372	0.0163534	0.144178	0.0175247	0	0.0178968
ADAM30	0.00100788	0	0.00322177	0.000505849	0	0
ADAM32	0.123217	0.0459027	0.174483	0.156459	0.0539923	0.0322263
ADAM33	0.994953	1.69255	1.14709	0.79015	0.925003	1.06927
ADAM3A	0.00646198	0.0049229	0	0.00477082	0.0116288	0.0232072
ADAM5	0	0.0243015	0.0342339	0.0106506	0	0.0171653
ADAM6	0.00238198	0	0.0056882	0	0	0.0022452
ADAM7	0.00815983	0.0319619	0.129216	0.0276856	0.00349178	0.0321129
ADAM8	0.0592058	0.237669	0.135314	0.127963	0.0738085	0.0768464
ADAM9	0.696004	0.990775	0.807047	1.10731	1.10767	1.22626
ADAMDEC1	0.368846	0.0352502	0.25172	0.0758716	0.0387335	0.00590532
ADAMTS1	5.17379	3.47948	2.14924	5.08939	3.36037	2.89268
ADAMTS10	0.105901	0.136545	0.33774	0.0424891	0.0580947	0.0558334
ADAMTS12	0.729149	0.31446	0.351468	0.421327	0.340649	0.463904
ADAMTS13	0.0934833	0.0535532	0.218673	0.0302205	0.0224932	0.0362748
ADAMTS14	0.0170424	0.00630827	0.0478348	0.00687955	0	0
ADAMTS15	0.0276429	0.0456334	0.186732	0.0337782	0.0199072	0.0362295
ADAMTS16	0	0.035531	0.0879077	0.0741025	0.0467553	0.030038
ADAMTS17	0.0104171	0.0698645	0.303278	0.0816845	0.0298476	0.0815108
ADAMTS18	0.0507513	0.0269253	0.107761	0.14007	0.0362724	0.0419597
ADAMTS19	0.0275498	0	0.0846239	0.0560342	0.025974	0.0370502
ADAMTS19-AS1	0	0	0	0	0	0
ADAMTS2	0.555597	0.17489	0.395154	0.340825	0.233651	0.567545
ADAMTS20	0.0286667	0.0361439	0.103576	0.0425041	0	0.0366932
ADAMTS3	0.071789	0.0827848	0.0808643	0.095384	0.0471596	0.0550513
ADAMTS4	0.852174	0.492939	0.569589	1.45672	0.616515	0.907982
ADAMTS5	0.519332	0.700538	0.422742	0.268365	0.538018	0.527389
ADAMTS6	0.0976262	0.122436	0.238531	0.129433	0.141351	0.0731056
ADAMTS7	0.0151827	0.0145723	0.0397487	0.0114318	0.0155275	0.019897
ADAMTS7P1	0.00867693	0.00811885	0.0351468	0.0096049	0.0028858	0.0142121
ADAMTS8	0.0583989	0.0775322	0.249646	0.0550869	0.0559217	0.0416952
ADAMTS9	0.629171	0.425095	0.40558	0.339045	0.351227	0.26742
ADAMTS9-AS1	0.23729	0.268073	0.207846	0.128987	0.152239	0.143734
ADAMTS9-AS2	0.745153	1.0495	0.509139	0.693693	0.596424	0.295122
ADAMTSL1	0.278673	0.496921	0.321194	0.313511	0.300295	0.285131
ADAMTSL2	0	0.0198345	0.0347963	0.0467065	0.0113896	0.0323003
ADAMTSL3	0.0986318	0.127325	0.454102	0.201195	0.118015	0.146697
ADAMTSL4	0.404698	0.747581	0.671069	0.495451	0.971446	0.872062
ADAMTSL4-AS1	0.500717	0.287338	0.155376	0.530654	0.179013	0.0722814
ADAMTSL5	0.0251996	0.0493658	0.0399186	0.0277869	0.0579557	0.027363
ADAP1	0.032024	0.0384084	0.0845924	0.0338863	0.0242811	0.00620618
ADAP2	0.454248	0.443927	0.457743	0.520411	0.281046	0
ADAR	2.37198	2.05057	1.66412	2.01403	1.78476	1.64121
ADARB1	0.456015	0.595833	0.396518	0.350308	0.397072	0.269709
ADARB2	0.00230264	0.0121352	0.0277462	0.0140821	0.00289583	0.015498
ADARB2-AS1	0.00899092	0.0193245	0.0630879	0.00246644	0	0
ADAT1	0.414583	0.49736	0.453019	0.491582	0.264841	0.391569
ADAT2	0.431314	0.208133	0.306181	0.510966	0.356713	0.335587
ADAT3	0.0372514	0.0857301	0.0684085	0.0738944	0.148869	0.107636
ADCK1	0.156208	0.115066	0.346123	0.491435	0.119718	0.313363
ADCK2	0.152233	0.23888	0.342423	0.154345	0.13986	0.376897
ADCK3	0.199448	0.41878	0.339461	0.189319	0.33943	0.368267
ADCK4	0.0885049	0.207966	0.521973	0.0964702	0.194156	0.112537
ADCK5	0.0111869	0.0306585	0.0478578	0.0102194	0.0262173	0.0207918
ADCY1	0.0645645	0.0949281	0.321317	0.0407755	0.019114	0.0158074
ADCY10	0.0500526	0.0223629	0.298299	0.0791434	0.0239017	0.0768838
ADCY10P1	0.0643917	0.0984549	0.208867	0.117091	0.147838	0.0703238
ADCY2	0.0688264	0.142913	0.2625	0.1812	0.238588	0.333019
ADCY3	1.19775	0.901086	0.944522	0.713539	0.700727	0.47264
ADCY4	1.34523	1.28702	0.877429	0.692151	0.711826	0.389754
ADCY5	0.0713438	0.143262	0.253686	0.0765678	0.114302	0.120803
ADCY6	0.456133	0.521094	0.44463	0.439035	0.4671	0.442337
ADCY7	0.939028	0.815027	0.433703	0.732821	0.378268	0.681963
ADCY8	0.0175909	0.0115607	0.164405	0.108636	0.308612	0.347323
ADCY9	0.030128	0.0836731	0.237273	0.0441015	0.0719771	0.0664594
ADCYAP1	0.0105938	0.0081358	0.0262318	0.0149241	0.0154598	0.00610283
ADCYAP1R1	0.146668	0.17811	0.126504	0.0969624	0.0944497	0.0475672
ADD1	0.342329	1.55048	1.21243	0.735752	1.27937	1.03634
ADD2	0.0376949	0.0310154	0.316981	0.0744779	0.0656803	0.0224022
ADD3	4.53951	6.77137	4.05198	4.68974	6.1734	5.60889
ADD3-AS1	2.80715	3.93637	2.60479	2.56677	3.69905	3.11405
ADGB	0.0273507	0.0243484	0.115203	0.0707021	0.0241872	0.0306108
ADH1A	2.87683	1.21815	1.72476	1.11883	0.610974	1.41909
ADH1B	40.3147	31.8589	26.465	17.1661	14.0431	18.2877
ADH1C	2.00635	1.51256	1.3288	0.818682	0.748693	0.996538
ADH4	0.028885	0.131858	0.201805	0.0740762	0.0702585	0.0427409
ADH5	2.50675	2.99488	1.95369	2.15219	2.46502	2.33918
ADH6	0.0415383	0.0301518	0.0514331	0.0520822	0.0244431	0.0284243
ADH7	0.0211925	0	0.0340616	0.0326655	0.0139523	0
ADHFE1	0.401916	0.473844	0.552565	0.740923	0.413935	0.250456
ADI1	0.453854	0.536662	0.554719	0.717001	0.610813	0.932434
ADIG	0.00577988	0.00500141	0.285421	0.0295573	0.00961337	0.0415341
ADIPOQ	0.0168635	0.034202	0.308599	0.0490508	0.0566012	0.530067
ADIPOQ-AS1	0	0.0104747	0.0332289	0.026606	0.0397316	0.260858
ADIPOR1	1.0423	0.855857	1.24504	1.17061	1.32415	1.47513
ADIPOR2	0.157293	0.307813	0.418021	0.219789	0.239294	0.315623
ADIRF	67.3269	69.9047	60.3376	45.3161	51.2687	43.6396
ADK	1.10365	1.04188	1.47172	1.49583	1.41378	1.88849
ADM	0.509274	0.692333	0.322063	0.490678	0.422616	0.496011
ADM2	0.000779021	0.00501993	0.00591503	0.0102321	0.00917233	0.00183205
ADM5	0.0378567	0.032884	0.0296978	0.00290729	0.0264304	0.016621
ADNP	1.29558	1.79097	1.19298	1.40296	1.69484	1.35453
ADNP2	0.17095	0.287838	0.262204	0.243669	0.233341	0.290953
ADO	0.0672232	0.0929518	0.0566622	0.0648358	0.0911049	0.0634738
ADORA1	0.00140587	0.00142666	0.0118827	0.00453697	0.0480368	0.0373515
ADORA2A	0.00508817	0.0433813	0.0714831	0.0115654	0.0479159	0.0253948
ADORA2A-AS1	0.0410171	0.0820803	0.310873	0.0927339	0.0370813	0.0482641
ADORA2B	0.161525	0.0111177	0.195034	0.175767	0.0334919	0.102495
ADORA3	0.137118	0.0732578	0.113016	0.0591846	0.0337762	0.0604546
ADPGK	0.434859	0.479783	0.488413	0.425506	0.373067	0.344463
ADPGK-AS1	0.00911571	0.0292868	0.020701	0.0103036	0.0380957	0.00416978
ADPRH	0.111967	0.130699	0.101011	0.0335202	0.0808733	0.0558866
ADPRHL1	0.0597449	0.0628772	0.125184	0.16627	0.139228	0.116923
ADPRHL2	0.196789	0.17715	0.310242	0.2991	0.257706	0.279228
ADPRM	0.507495	0.640262	0.595057	0.237531	0.376287	0.520307
ADRA1A	0.0147759	0.102564	0.153204	0.0415818	0.104862	0.0347203
ADRA1B	0.00268769	0.0148684	0.00134695	0.00455922	0.00411718	0.00125549
ADRA1D	0.0101826	0.0135668	0.0163846	0.005045	0.00393398	0.00178126
ADRA2A	0.205836	0.104242	0.0821872	0.0976878	0.0923423	0.0661729
ADRA2B	0.0153695	0.0272249	0.00917043	0.00750898	0.0160055	0.00148378
ADRA2C	0.0151164	0.0183799	0.0509209	0.00531812	0.0183322	0.016201
ADRB1	0.130196	0.619366	0.0656555	0.216803	0.303501	0.0850444
ADRB2	0.423999	0.660382	0.2974	0.202351	0.42839	0.237131
ADRB3	0	0.00218273	0.00368662	0	0.00158118	0
ADRBK1	0.0447904	0.0714043	0.0410335	0.0286915	0.0658713	0.0268795
ADRBK2	0.427905	0.154351	0.4636	0.173723	0.173297	0.121725
ADRM1	0.60435	0.654923	0.920044	0.586336	0.651307	0.849586
ADSL	2.46126	2.28645	1.89843	2.29031	1.62034	1.87792
ADSS	0.329178	0.457173	0.368339	0.367542	0.374176	0.50911
ADSSL1	0.0549507	0.0988314	0.116869	0.0670144	0.0836633	0.107104
ADTRP	0.165857	0.253515	0.852706	1.63936	0.230699	1.3696
AEBP1	3.25085	3.2672	3.07962	1.89653	2.5318	2.22818
AEBP2	1.27276	1.46292	0.998676	1.28021	1.42854	1.49116
AEN	0.0878575	0.133264	0.19916	0.0588659	0.118648	0.140831
AES	1.44219	2.29919	2.53681	1.41921	2.65472	2.3876
AFAP1	0.0902543	0.191911	0.218327	0.0989486	0.353992	0.10535
AFAP1-AS1	0.00306537	0.00754123	0.0173519	0.00253	0.00306135	0.00234403
AFAP1L1	0.227251	0.215174	0.267056	0.209661	0.229292	0.16736
AFAP1L2	0.420378	0.935844	0.449985	0.308606	0.540737	0.234969
AFF1	0.632887	0.703744	0.445497	0.533938	0.554611	0.496085
AFF2	0.154807	0.134509	0.252551	0.0443128	0.0494887	0.0436135
AFF3	0.126593	0.0951426	0.269597	0.106733	0.090206	0.105023
AFF4	0.704504	0.708766	0.49767	0.480265	0.704194	0.489911
AFG3L1P	0.283161	0.128225	0.340304	0.325004	0.19852	0.184483
AFG3L2	2.65422	2.48858	3.48634	2.64837	2.53697	3.20645
AFM	0.00553884	0	0.0617073	0.0138832	0	0.00360943
AFMID	1.0985	2.01146	1.62848	1.99076	3.02023	0
AFP	0.0276618	0	0.0481513	0.0163327	0.0216321	0.00507577
AFTPH	0.697876	1.13165	1.05082	0.83096	1.02058	0.800121
AGA	2.30937	1.33794	2.23124	2.08755	1.0114	2.17704
AGAP1	0.357817	0.217653	0.411675	0.18134	0.181618	0.198332
AGAP11	0.485854	0.357623	0.359569	0.189187	0.469429	0.226799
AGAP2	0.064105	0.153744	0.111126	0.0832933	0.0732377	0.0524756
AGAP2-AS1	0.011915	0.0280407	0.0409184	0.0387726	0.0251202	0.0146818
AGAP3	0.282647	0.740958	0.461855	0.406159	0.644722	0.552426
AGAP4	0.0609089	0.0959135	0.128704	0.146809	0.0749001	0.0718902
AGAP5	0.0880639	0.0882013	0.18867	0.0987065	0.0904983	0.0883625
AGAP6	0.138891	0.202128	0.208595	0.191061	0.121836	0.119155
AGAP7P	0.0370487	0.0669682	0.147562	0.0711215	0.0484279	0.0346525
AGAP9	0.126524	0.128173	0.169434	0.0857053	0.176672	0.113491
AGBL1	0.0121652	0.0242525	0.0702406	0.0142447	0	0.0168885
AGBL1-AS1	0	0.0113995	0.118611	0.0237577	0	0.0028311
AGBL2	0.0223377	0.0459027	0.212872	0.0877269	0.021945	0.0280032
AGBL3	0.121867	0.244499	0.187782	0.148151	0.0969957	0.0705707
AGBL4	0.0231724	0.0302346	0.0735333	0.0140198	0.0557853	0.0362715
AGBL4-IT1	0.0039789	0.0106256	0.120602	0.04036	0.0137467	0.00986955
AGBL5	3.55661	2.60894	2.84241	3.13768	3.01567	2.86213
AGBL5-AS1	0	0	0.0682423	0	0	0
AGER	0.0166301	0.0306018	0.0120918	0.0328918	0.031498	0.0184625
AGFG1	0.529909	0.334214	0.280862	0.314123	0.400522	0.488934
AGFG2	0.0502295	0.091529	0.269111	0.202493	0.210754	0.221907
AGGF1	0.294747	0.421236	0.328623	0.27863	0.260157	0.269431
AGK	0.774187	0.587497	0.334067	0.586069	0.552841	0.715581
AGL	0.209516	0.29241	0.391536	0.214431	0.330107	0.39959
AGMAT	0.0498495	0.0275416	0.162356	0.028888	0.0412707	0.0983146
AGMO	0.24303	0.256342	0.290736	0.148924	0.108906	0.0861611
AGO1	0.511632	0.537005	0.397227	0.544491	0.47946	0.479476
AGO2	0.16025	0.262793	0.469007	0.104819	0.189746	0.114118
AGO3	0.25723	0.342358	0.305855	0.137672	0.276005	0.255605
AGO4	0.276126	0.225923	0.178261	0.279107	0.20785	0.185588
AGPAT1	0.120878	0.180546	0.737457	0.479364	0.171077	0.845937
AGPAT2	0.0150779	0.0608849	0.0550115	0.0571862	0.0279939	0.0311943
AGPAT3	0.0508407	0.111938	0.740839	0.451824	0.159314	0.512164
AGPAT4	0.541386	0.274786	0.322432	0.480749	0.245216	0.289672
AGPAT4-IT1	0.0344162	0.0318335	0.25504	0.0853725	0.0207456	0.0696326
AGPAT5	0.0911385	0.165276	0.168268	0.18162	0.137167	0.155708
AGPAT6	0.175343	0.176703	0.194085	0.215699	0.095265	0.123019
AGPAT9	0.345233	0.378038	0.216994	0.126038	0.158336	0.0789498
AGPS	0.258285	0.210235	0.332885	0.162223	0.177767	0.345355
AGR2	0.0613445	0.055739	0.400747	1.10475	0.133696	0.536001
AGR3	0.105546	0.0265375	0.13034	0.0773443	0.00829099	0.0117405
AGRN	0.0200602	0.0373829	0.0567115	0.0309006	0.047978	0.0307601
AGRP	0	0.0149403	0.0718947	0	0.00333423	0
AGT	0.0211166	0.148472	0.105205	0.0582847	0.0632479	0.105441
AGTPBP1	0.469035	0.310771	0.296806	0.323992	0.224262	0.211858
AGTR1	0.166179	0.324873	0.252905	0.123664	0.223985	0.330314
AGTR2	0	0	0.00438412	0	0	0
AGTRAP	1.89422	2.40198	2.50531	2.23184	1.9114	2.16728
AGXT	0	0	0.0167221	0	0	0.00122518
AGXT2	0.0352348	0.0569715	0.302696	0.110537	0.00885708	0.0417293
AHCTF1	0.689461	0.615895	0.468288	0.493841	0.743431	0.692119
AHCTF1P1	0.151076	0.112629	0.102437	0.110049	0.165979	0.122125
AHCY	0.83486	1.86685	1.84829	2.01845	1.77883	2.19231
AHCYL1	1.12934	1.13727	1.07471	1.49622	1.01708	1.42741
AHCYL2	0.137447	0.188182	0.267409	0.299666	0.285247	0.225124
AHDC1	0.291843	0.497462	0.462525	0.364141	0.5408	0.292745
AHI1	0.874925	1.30651	1.06183	0.6444	1.09088	1.14157
AHNAK	7.52162	6.53587	4.31872	5.67191	5.44712	4.58374
AHNAK2	0.796175	0.648489	0.726676	1.20516	0.87209	0.759748
AHR	2.89645	2.1564	1.68079	1.36391	1.31274	1.27604
AHRR	0.0826739	0.0983251	0.206172	0.109981	0.0375858	0.084346
AHSA1	1.43705	4.23905	2.34925	2.14275	2.94046	1.97405
AHSA2	0.356458	0.515654	0.321825	0.329089	0.336827	0.251992
AHSG	0.000431974	0.018996	0.115328	0.109754	0.0109093	0.0182728
AHSP	0.0426278	0.034002	0.366591	0.246534	0.0126872	0.0240292
AICDA	0.00835812	0.0119265	0.107383	0.0240195	0.022773	0.039941
AIDA	0.680872	0.738406	0.587401	0.374287	0.559681	0.691435
AIF1	0.892749	0.885169	0.810012	0.539382	0.499838	0.416028
AIF1L	0.383526	0.101742	0.229276	0.331533	0.259258	0.464924
AIFM1	0.43175	0.380115	0.642014	0.576522	0.677308	0.761757
AIFM2	0.143684	0.149197	0.400987	0.315953	0.192292	0.316011
AIFM3	0.0109101	0.00997886	0.170021	0.0312954	0.145183	0.0115546
AIG1	2.5444	2.14621	1.98907	1.62386	2.11337	2.00131
AIM1	0.7625	0.50324	0.452945	0.789905	0.41403	0.639611
AIM1L	0.065763	0.0850692	0.350265	0.108739	0.0371384	0.270835
AIM2	0.057727	0.0548092	0.123237	0.0804516	0.11289	0.00890911
AIMP1	3.56388	2.12808	2.69181	2.4916	2.91276	2.78978
AIMP2	0.469967	0.668092	1.12262	0.542527	0.742219	1.0041
AIP	0.169005	1.51142	1.84626	0.24051	1.55152	0.915582
AIPL1	0.000720055	0.00971487	0.0847767	0.00280438	0.00119064	0.0187991
AIRE	0.00818888	0.0456599	0	0	0.0103632	0
AIRN	0.00358506	0.0246077	0.0170575	0.00476804	0.00867365	0.00807109
AJAP1	0.0142557	0	0.0444377	0.0210973	0	0.0107668
AJUBA	0.0700322	0.156868	0.229038	0.105616	0.142654	0.0775229
AK1	0.842009	1.82053	2.72956	2.25558	1.7964	2.95198
AK2	1.39802	1.3553	1.54839	1.45914	1.40926	1.75505
AK3	0.52079	0.433388	0.46677	0.430749	0.432481	0.591414
AK4	0.227275	0.189718	0.200934	0.265187	0.284992	0.326555
AK5	0.113793	0.0801663	0.157896	0.103107	0.100717	0.0430065
AK6	2.55169	2.05933	1.84801	2.79216	2.01397	2.65124
AK7	0.109419	0.0669125	0.42204	0.10676	0.0504593	0.051843
AK8	0.158188	0.138464	0.167525	0.11905	0.132784	0.212787
AK9	0.187296	0.196602	0.339094	0.383992	0.256837	0.360958
AKAP1	0.23534	0.732721	0.849778	0.607377	0.917161	0
AKAP10	0.258704	0.310082	0.402085	0.161345	0.291355	0
AKAP11	0.296836	0.317971	0.250895	0.279055	0.291751	0.253512
AKAP12	0.854754	0.993327	0.955097	0.624981	0.944076	0.991896
AKAP13	8.5192	4.76395	4.57439	5.94973	3.81511	3.74197
AKAP14	0.0178194	0.0527411	0.105539	0.0223735	0.0187629	0.0116281
AKAP17A	0.118508	0.150453	0.279072	0.125443	0.141413	0.139005
AKAP2	1.6328	1.41084	1.0465	0.935941	1.06869	0.971723
AKAP3	0.0405119	0	0.0291154	0.0358523	0.0326266	0.0245316
AKAP4	0	0	0.0283589	0.00267088	0	0.00487672
AKAP5	0.0171011	0.00688925	0.03041	0.0053229	0.0176112	0.0365251
AKAP6	0.439414	0.288323	0.241346	0.0801444	0.164918	0.0961963
AKAP7	0.50003	0.244288	0.172556	0.106481	0.185155	0.192349
AKAP8	0.389549	0.439136	0.464005	0.467721	0.394739	0.305338
AKAP8L	0.081336	0.0701802	0.096826	0.0697063	0.105952	0.0610175
AKAP9	3.10535	2.83926	1.68729	1.5728	2.65856	2.7358
AKIP1	0.145909	0.827189	0.654922	0.296261	0.701382	0.389712
AKIRIN1	0.528079	0.372135	0.540393	0.553794	0.534502	0.47571
AKIRIN2	0.68516	0.774148	0.563714	0.533408	0.599715	0.583439
AKNA	0.124962	0.268547	0.316033	0.0884757	0.0848045	0.0603291
AKNAD1	0.223055	0.181948	0.257377	0.106099	0.0940729	0.0512873
AKR1A1	6.30159	5.6227	7.35563	7.4265	5.75195	9.75185
AKR1B1	3.15172	3.8813	3.48625	3.04873	2.9666	3.30148
AKR1B10	0	0	0.048815	0.0808571	0.0272643	0.023172
AKR1B15	0	0.0334252	0.0936817	0.0777471	0.0145167	0.00485885
AKR1C1	1.7643	1.11715	1.06967	2.43464	2.47863	3.72048
AKR1C2	5.05502	3.21393	3.07924	4.58691	3.23955	4.33025
AKR1C3	6.21284	4.28579	3.85111	5.13409	3.6645	5.5596
AKR1C4	0.404233	0.21394	0.29352	0.390717	0.204485	0.530333
AKR1C6P	0.0152102	0	0.0686886	0.0237836	0.0162408	0.0451298
AKR1CL1	0.00225356	0.0328855	0.0552902	0.00909499	0.0212539	0.010796
AKR1D1	0.00477841	0.0413489	0.210745	0.0166979	0.009837	0.018442
AKR1E2	0.105657	0.075776	0.152954	0.099891	0.110723	0.153175
AKR7A2	0.141503	0.254967	0.294049	0.200271	0.186002	0.296269
AKR7A2P1	0.0263409	0.111417	0.0746018	0.0206334	0.0693237	0.0787142
AKR7A3	0.0147581	0.033152	0.0790064	0.0163733	0.0240322	0.0686244
AKR7L	0.027028	0.0363804	0.317542	0.0287258	0.00254805	0.0592493
AKT1	0.0405494	0.291413	0.29552	0.0584281	0.286708	0.233366
AKT1S1	0.201745	0.154732	0.203101	0.236447	0.149597	0.204256
AKT2	0.125193	0.181308	0.411646	0.0746174	0.141506	0.0970961
AKT3	0.487922	0.412207	0.380929	0.467671	0.718641	0.305561
AKTIP	0.546807	0.781038	0.574928	0.42284	0.675757	0.654802
ALAD	0.578787	0.619349	0.756189	0.883782	0.700409	0.799488
ALAS1	1.87067	2.5098	2.73583	3.28418	2.8425	3.66119
ALAS2	0.0341451	0.0232636	0.0271005	0.145296	0.0372803	0.0665358
ALB	0.028342	0.0344271	0.230628	0.066685	0.0421074	0.0399717
ALCAM	0.311279	0.39832	0.455093	0.634801	0.575113	0.770751
ALDH16A1	1.05266	1.27111	1.05933	0.76498	0.904404	0.902443
ALDH18A1	1.01886	0.553039	0.642073	0.814756	0.963796	0.864868
ALDH1A1	1.73591	2.59747	1.68324	1.46168	2.4098	2.41382
ALDH1A2	0.0448091	0.171717	0.167771	0.121447	0.255106	0.174049
ALDH1A3	0.131081	0.191814	0.225698	0.146224	0.232746	0.178896
ALDH1B1	0.116666	0.85636	0.721835	0.197184	0.462779	0.358407
ALDH1L1	0.104942	0.101288	0.249145	0.336981	0.116641	0.20077
ALDH1L1-AS1	0.0636624	0.0770713	0.0593437	0.0784778	0.109509	0.136858
ALDH1L1-AS2	0.000188474	0.00102006	0.0016152	0.00999541	0.00435891	0.0304969
ALDH1L2	0.137432	0.162084	0.285167	0.249051	0.137815	0.190624
ALDH2	1.07853	1.89866	1.99218	1.32676	1.96957	2.60124
ALDH3A1	0.107532	0.189321	0.132175	0.218687	0.10568	0
ALDH3A2	0.873224	1.5713	1.30248	0.976706	1.1683	0
ALDH3B1	0.17286	0.156393	0.241237	0.0721899	0.109047	0.0916605
ALDH3B2	0.030436	0.14018	1.58752	1.68517	0.471938	2.53619
ALDH4A1	0.076601	0.0385504	0.117333	0.0680865	0.067363	0.0708245
ALDH5A1	0.0301926	0.0915616	0.298633	0.125231	0.0901579	0.133436
ALDH6A1	0.630133	1.20137	0.995224	0.923694	1.12242	1.11486
ALDH7A1	1.42738	1.22806	1.22513	1.47885	1.14059	1.53824
ALDH8A1	0.0444297	0.00207049	0.162468	0.0186576	0.0404086	0.0626282
ALDH9A1	1.07509	1.44448	1.52492	1.45484	1.88383	2.36666
ALDOA	12.7483	26.5923	29.116	25.9449	29.5184	34.1999
ALDOB	0.00877487	0.017426	0.122877	0.0166237	0.0166289	0.0618094
ALDOC	0.982479	1.43117	1.62683	0.899927	1.48652	0
ALG1	0.0605755	0.112802	0.27279	0.0275365	0.110904	0.109017
ALG10	0.0479109	0.0591944	0.27262	0.185748	0.107567	0.059517
ALG10B	0.0273881	0.0449156	0.0575599	0.0813872	0.105523	0.0666595
ALG11	2.69221	1.70786	1.70769	1.59037	1.85127	2.04187
ALG12	0.0466474	0.341675	0.432297	0.106621	0.335812	0.162505
ALG13	1.30743	1.44461	1.2365	1.69658	1.41658	1.53464
ALG14	1.73037	0.982416	1.13751	1.54337	0.998113	1.54401
ALG1L	0.0365885	0.0714913	0.0995526	0.107495	0.0798325	0.166665
ALG1L2	0.0945962	0.0583803	0.104644	0.0673868	0.0331859	0.0322554
ALG1L9P	0.0428738	0.083786	0.217548	0.0382025	0.045612	0.0476175
ALG2	0.172865	0.148112	0.122016	0.100925	0.13783	0.179361
ALG3	0.287432	0.272145	0.460035	0.244878	0.205901	0.335089
ALG5	0.550841	0.971105	1.19525	0.971328	1.41083	1.47189
ALG6	0.304893	0.386578	0.31763	0.499227	0.511155	0.437863
ALG8	0.961509	0.735528	0.758851	1.027	0.842639	0.873514
ALG9	0.208329	0.178314	0.204887	0.279765	0.283436	0.272816
ALK	0.0180935	0.0612794	0.10928	0.0861974	0.0612663	0.0595557
ALKBH1	0.170443	0.378974	0.37769	0.505696	0.312641	0.430613
ALKBH2	0.952297	0.656088	0.716533	0.67682	0.634724	0.63515
ALKBH3	0.506122	0.432753	0.489033	0.340368	0.591249	0.450338
ALKBH3-AS1	0.0146532	0.0273092	0.0096833	0.0567084	0.0427032	0.0406575
ALKBH4	0.0633068	0.0754712	0.218623	0.0754688	0.0667671	0.0782475
ALKBH5	1.19204	1.58025	1.289	0.81886	1.28313	0
ALKBH6	0.0429523	0.0735993	0.110927	0.03027	0.0737444	0.118933
ALKBH7	0.0675423	0.0455898	0.122187	0.0252135	0.13622	0.149284
ALKBH8	0.432566	0.216026	0.337685	0.266576	0.254945	0.323661
ALLC	0	0	0.174638	0.0191098	0.0463398	0.046645
ALMS1	0.182328	0.249721	0.51764	0.154041	0.213395	0.149382
ALMS1-IT1	0.0283901	0.007104	0.0308042	0.00925667	0.0214788	0.00896928
ALMS1P	0.0189005	0.0641973	0.182026	0.15316	0.0435097	0.0268023
ALOX12	0.306336	0.242239	0.31933	0.163488	0.345839	0.24625
ALOX12B	0.0108488	0.0573345	0.348947	0.103422	0.0364136	0.0290892
ALOX12P2	0.00247857	0.0275692	0.0513324	0.131853	0.0723378	0.083966
ALOX15	0.168782	0.441905	0.148246	0.17668	0.220518	0.0268232
ALOX15B	0.0362838	0.247208	3.92164	3.9421	0.89052	5.78052
ALOX15P1	0.0603118	0.0392086	0.0207901	0.075205	0.0774284	0.0142121
ALOX5	0.120673	0.128883	0.107532	0.185923	0.132185	0.0398633
ALOX5AP	7.00425	5.44394	3.0433	4.68132	2.03364	1.7241
ALOXE3	0.0188474	0.0408919	0.168109	0.053081	0.00793479	0.0257205
ALPI	0	0	0.0204592	0.00856209	0	0
ALPK1	0.554916	0.461411	0.456675	0.91972	0.42617	0.552339
ALPK2	0.0616669	0.0395274	0.128812	0.126023	0.0501937	0.130896
ALPK3	0.0625142	0.0588453	0.0665145	0.0416043	0.0375135	0.018588
ALPL	0.0379437	0.0333055	0.0640912	0.0167514	0.061671	0.0145571
ALPP	0	0	0.0153864	0.013929	0	0
ALPPL2	0	0	0.031658	0	0	0
ALS2	0.352724	0.353259	0.307887	0.663407	0.287491	0.294091
ALS2CL	0.177985	0.238628	0.277721	0.215239	0.129753	0.126378
ALS2CR11	0.212452	0.107772	0.231871	0.158728	0.119376	0.142624
ALS2CR12	0.0342269	0.0678978	0.0798556	0.132885	0.0390893	0.039794
ALX1	0.0441849	0.148043	0.0851424	0.0761356	0.120973	0.0219396
ALX3	0.00900001	0.0584756	0.0609466	0.0102337	0.0934304	0.0165773
ALX4	0.00196595	0.0231711	0.0152705	0.0417164	0.0282372	0.0220805
ALYREF	1.12125	1.19657	0.909997	1.0614	1.36973	0
AMACR	0.0444261	0.0935291	0.0939754	0.0822386	0.0815928	0.19665
AMBN	0.0150779	0.00661699	0.0689153	0.03027	0.0500616	0.0224511
AMBP	0.0288687	0	0.09012	0.0155041	0.0104405	0.0392352
AMBRA1	0.195041	0.159261	0.359137	0.147064	0.142959	0.104161
AMD1	2.08432	2.42654	1.20392	1.83606	2.71389	1.70562
AMDHD1	0.0335606	0.0436239	0.2271	0.0115856	0.00598739	0.0486133
AMDHD2	0.0151856	0.0119007	0.0344576	0.0160184	0.0767685	0.0742128
AMELX	0.0231554	0.0268925	0.016673	0.0245944	0.00800215	0.00633875
AMELY	0	0	0	0	0	0
AMER1	0.00826114	0.00875528	0.0199362	0.00944015	0.016526	0.0142311
AMER2	0.0017899	0.00206318	0.0372984	0.00349878	0.000816929	0.00365192
AMER3	0.000496148	0.000735088	0.0361499	0.000605101	0.00311875	0.00179113
AMFR	1.25334	1.31992	1.13116	1.2137	1.42755	1.41031
AMH	0.00477906	0	0.0040956	0.00296491	0.00385496	0.00113697
AMHR2	0.0966686	0.0656259	0.203705	0.0722929	0.0587324	0.0388053
AMICA1	2.9132	3.03083	1.40743	1.29349	1.04719	0.381716
AMIGO1	0.0111837	0.00278454	0.0290855	0.0148151	0.0307918	0.0399194
AMIGO2	0.292504	0.25983	0.24331	0.164638	0.274669	0.234437
AMIGO3	0.00195323	0.00531825	0.0227302	0.0145341	0.0124021	0.004519
AMMECR1	0.107847	0.0780384	0.105906	0.122465	0.0952332	0.144993
AMMECR1L	0.271728	0.179067	0.201391	0.213296	0.293306	0.200653
AMN	0.0150779	0	0.0217627	0.00145796	0	0
AMN1	0.580363	0.598701	0.683712	0.624284	0.726602	0.748811
AMOT	0.199054	0.235993	0.442773	0.330529	0.362896	0.231412
AMOTL1	0.5273	0.75424	0.561903	0.451956	0.641062	0.468872
AMOTL2	1.41506	0.931053	0.889225	1.05292	0.672003	0.678458
AMPD1	0.0150779	0.0160383	0.0516865	0.0285237	0.00597518	0.0284243
AMPD2	0.282864	0.402787	0.452198	0.33845	0.379123	0.221814
AMPD3	0.100397	0.178924	0.140562	0.0797601	0.105195	0.0553121
AMPH	0.0527605	0.0517743	0.217452	0.0957443	0.0562565	0.0628454
AMT	0.279888	0.445646	0.438273	0.465401	0.307248	0.303008
AMTN	0.0107617	0	0.129831	0	0.0372875	0.13035
AMY1A	0.0631838	0.149852	0.446257	0.173212	0.131252	0.128248
AMY1B	0.0631838	0.149852	0.313892	0.173212	0.131252	0.128248
AMY1C	0.0631838	0.149852	0.325854	0.173212	0.131252	0.128248
AMY2A	0.0694755	0.148123	0.0858085	0.092845	0.0644329	0.0548183
AMY2B	0.406648	0.58554	0.389119	0.38465	0.378102	0.370046
AMZ1	0.01204	0.0159165	0.0562942	0.0477515	0.00432675	0.0266615
AMZ2	1.12335	1.70722	1.17229	1.52504	1.73978	0
AMZ2P1	1.39594	1.9501	1.10545	0.797545	1.41379	0
ANAPC1	0.210081	0.304772	0.235629	0.266824	0.236188	0.259503
ANAPC10	1.54185	1.10149	1.98412	1.05333	1.36266	1.16923
ANAPC11	6.20327	7.61501	11.3467	7.85103	8.15258	0
ANAPC13	3.10941	2.7991	3.36331	2.9408	2.86617	3.62733
ANAPC15	1.44115	1.03979	2.13019	2.10881	1.22443	1.75458
ANAPC16	7.00649	6.84642	8.21567	6.0059	7.09978	9.37593
ANAPC1P1	0.020633	0.0234198	0.121251	0.0245756	0.0427674	0.0390347
ANAPC2	0.0356845	0.0288762	0.208734	0.0293725	0.0353562	0.0208364
ANAPC4	0.624201	0.76702	0.53512	0.813506	0.848449	0.773322
ANAPC5	2.37862	4.86757	4.55301	5.25947	4.21031	5.0971
ANAPC7	0.376283	0.437444	0.880375	0.593233	0.576804	0.689054
ANG	4.29284	5.54056	3.84069	2.94846	3.83012	4.17986
ANGEL1	0.252831	0.285263	0.26673	0.283241	0.300517	0.224708
ANGEL2	0.314982	0.264874	0.25264	0.223795	0.252361	0.391096
ANGPT1	0.304712	0.700115	0.355013	0.415145	0.588845	0.425909
ANGPT2	3.93346	2.58094	1.61485	2.03179	1.14995	0.762941
ANGPT4	0.0347406	0.167851	0.419211	0.052899	0.100769	0.0477187
ANGPTL1	5.82488	3.01941	3.92171	3.12266	2.8402	7.34032
ANGPTL2	1.13491	1.09732	1.09932	1.32632	0.973851	1.59532
ANGPTL3	0.00638436	0.00835926	0.025214	0.0247697	0.0295239	0.00979414
ANGPTL4	0.327842	0.761238	0.799587	0.701669	0.691128	0.909034
ANGPTL5	2.90796	2.55399	1.98017	1.7376	1.71155	2.38823
ANGPTL6	0.256733	0.339798	0.197062	0.0706869	0.349528	0.198296
ANGPTL7	0.0500278	0.37814	0.484268	1.0097	1.68244	1.09372
ANHX	0	0	0.0200335	0	0	0
ANK1	0.0387719	0.125127	0.171394	0.132972	0.0399988	0.0728504
ANK2	7.68061	3.04689	2.80464	4.04555	2.05925	3.75904
ANK3	0.331422	0.294431	0.496503	0.887633	1.32211	1.32385
ANKAR	0.0828205	0.190039	0.188854	0.117343	0.117722	0.0747598
ANKDD1A	0.212175	0.133072	0.278272	0.29089	0.125856	0.187183
ANKDD1B	0.0204181	0.0914867	0.0704815	0.0810353	0.0749307	0.0198109
ANKEF1	0.017792	0.0611016	0.163157	0.104331	0.0319091	0.0190443
ANKFN1	0.413368	0.197264	0.394275	0.110536	0.0815966	0
ANKFY1	0.601165	0.451441	0.405405	0.427883	0.405321	0.345215
ANKH	0.410572	0.342199	0.472156	0.586027	0.413695	0.454789
ANKHD1	1.37348	2.31654	1.67583	1.46355	1.95946	1.65975
ANKHD1-EIF4EBP3	1.81103	2.31654	1.67583	1.73902	1.95946	1.65975
ANKIB1	0.428213	0.52213	0.425107	0.424935	0.572018	0.498294
ANKK1	0.0950291	0.0302161	0.36879	0.0639103	0.0103177	0.0437888
ANKLE1	0.00113055	0.0169433	0.0500713	0.00765709	0.00889957	0.00732481
ANKLE2	0.208299	0.243438	0.211395	0.142262	0.163126	0.22981
ANKMY1	0.0538498	0.070017	0.0762044	0.140419	0.0916487	0.110286
ANKMY2	0.96846	1.16562	0.600645	0.873489	0.903326	0.840459
ANKRA2	0.27036	0.560106	0.575703	0.475826	0.591681	0.285371
ANKRD1	0.0107454	0.00990386	0.0414611	0.0106307	0.00648574	0.00714659
ANKRD10	3.06216	2.80396	2.66766	1.89149	2.6093	2.66707
ANKRD11	0.373405	0.442072	0.626698	0.486058	0.746214	0.5222
ANKRD12	2.97412	3.86592	3.95862	3.20974	3.71119	3.64974
ANKRD13A	0.581505	0.417866	0.596294	0.404854	0.475803	0.504833
ANKRD13B	0.00983065	0.0493368	0.110702	0.0298185	0.123738	0
ANKRD13C	0.178537	0.25061	0.154481	0.134117	0.185018	0.188969
ANKRD13D	0.0787266	0.204305	0.164156	0.0902046	0.195768	0.0881075
ANKRD16	0.0862794	0.188017	0.291176	0.11404	0.159701	0.0914488
ANKRD17	1.8075	2.21844	1.72019	1.76318	2.17245	2.22969
ANKRD18A	0.0389625	0.0170306	0.0873082	0.0237906	0.0643361	0.0510869
ANKRD18B	0.02409	0.0146259	0.078721	0.0154029	0.00749375	0.0494423
ANKRD18DP	0.017093	0.00167315	0.21544	0.0777081	0.0227478	0
ANKRD19P	0.565501	2.81673	3.52114	1.22371	2.61397	2.1789
ANKRD2	0.0324404	0.0137554	0.0486756	0.0330218	0.00487224	0.0213182
ANKRD20A1	0.0687802	0.0591076	0.0732815	0.0441986	0.0976545	0.0424334
ANKRD20A11P	0.0142285	0.016969	0.0502181	0.043205	0.146285	0.0322699
ANKRD20A12P	0.148185	0.126084	0.150652	0.0630977	0.0798141	0.0535434
ANKRD20A19P	0.0141356	0.0305037	0.118807	0.0279577	0.0166053	0.0143108
ANKRD20A2	0.0427208	0.0325976	0.142512	0.0407444	0.0418814	0.0316098
ANKRD20A3	0.0687802	0.0591076	0.142512	0.0441986	0.0976545	0.0424334
ANKRD20A4	0.087576	0.130163	0.114235	0.0399213	0.139531	0.0823526
ANKRD20A5P	0.0234916	0.0682166	0.142898	0.0965079	0.0226989	0.0486557
ANKRD20A8P	0.0587821	0.0687464	0.130902	0.0399213	0.0343175	0.0426364
ANKRD20A9P	0.00385187	0.0030645	0.0340275	0.00845766	0.00221278	0.00286422
ANKRD22	0.0913815	0.0717134	0.394436	0.670276	0.207292	0.53451
ANKRD23	0.0414387	0.0918055	0.219667	0.0663057	0.0650295	0.0215336
ANKRD24	0.0283112	0.00944501	0.127547	0.0555893	0.0558816	0.0262224
ANKRD26	0.341149	0.442822	0.479616	0.245227	0.406068	0.461363
ANKRD26P1	0.0150779	0.0106751	0.0729275	0.0673818	0.0111365	0.00725412
ANKRD26P3	0.0265164	0.0353923	0.0797575	0.0814159	0	0.0383483
ANKRD27	0.155856	0.245792	0.212042	0.186738	0.280557	0.278044
ANKRD28	1.42774	0.721139	0.38405	0.791524	0.353416	0.457384
ANKRD29	0.124986	0.198499	0.185479	0.106085	0.122077	0.178398
ANKRD30A	0.0026314	0.00341801	0.0967037	0.0154179	0.0125286	0.0162752
ANKRD30B	0.00675908	0.0474856	0.139837	0.0474783	0.0403374	0.0394064
ANKRD30BL	0	0.0122032	0.0254456	0.009081	0.00755694	0
ANKRD30BP2	0.0225009	0.0412687	0.112578	0.0181908	0.0304266	0.0281771
ANKRD30BP3	0.000186147	0.0143942	0.0525408	0.00387756	0.00782652	0.0243121
ANKRD31	0.032349	0.118746	0.0462648	0.0242221	0.0162736	0.0665884
ANKRD32	0.678696	1.15904	0.495867	0.507212	0.835658	0.690533
ANKRD33	0.00315062	0.0247498	0.0680826	0.0584222	0.00822774	0.0265682
ANKRD33B	0.0550483	0.0800958	0.0584261	0.075121	0.0762046	0.0839283
ANKRD34A	0.0626264	0.0879803	0.00509659	0.0367754	0.0727853	0.0127517
ANKRD34B	0	0.0113867	0.110885	0.00859013	0	0.00478493
ANKRD34C	0	0	0.00827149	0.000605521	0	0.0005686
ANKRD35	0.164247	0.330269	0.327557	0.250903	0.365103	0.303684
ANKRD36	2.19601	1.60023	1.02713	1.35593	1.37341	1.14534
ANKRD36B	1.0892	1.41798	0.826138	0.837031	1.23682	1.12289
ANKRD36BP1	0.855849	0.670395	0.509531	0.760415	0.713616	0.610992
ANKRD36BP2	0.270588	0.220209	0.154331	0.0766976	0.241091	0.10552
ANKRD37	0.783462	0.801348	0.570325	1.06375	1.6948	2.26809
ANKRD39	0.243453	0.272416	0.502423	0.340463	0.318743	0.534976
ANKRD40	1.50649	1.766	1.41362	1.56464	1.74833	0
ANKRD42	0.54897	0.304218	0.396728	0.403637	0.50646	0.254762
ANKRD44	0.833632	0.753852	0.41933	0.399308	0.392014	0.449205
ANKRD44-IT1	0.113235	0.131567	0.250295	0.0703727	0.0447808	0.0567991
ANKRD45	0.0550165	0.0209381	0.0794339	0.00825179	0.00478498	0.0324435
ANKRD46	0.448251	0.719972	0.433677	0.601935	0.655111	0.638434
ANKRD49	0.525128	0.426447	0.426116	0.402339	0.469571	0.484806
ANKRD50	0.229214	0.275171	0.189796	0.202513	0.224155	0.180945
ANKRD52	0.0614287	0.0908716	0.241589	0.0405859	0.051879	0.0640164
ANKRD53	0.120624	0.104811	0.169661	0.0919451	0.0892664	0.0535798
ANKRD54	0.395482	0.343659	0.458358	0.271753	0.354432	0.337254
ANKRD55	0.0510205	0.0810196	0.146398	0.0740534	0.0576993	0.0549875
ANKRD6	0.0758817	0.118701	0.305131	0.087962	0.177708	0.139857
ANKRD61	0.00751858	0.0170184	0.0614738	0.0268723	0.0271133	0.0333069
ANKRD62	0	0.00351569	0.0411659	0.00782171	0.0203954	0.0310808
ANKRD62P1-PARP4P3	0.0160203	0.0973328	0.0892976	0.0563779	0.102265	0.0419258
ANKRD63	0	0	0	0	0	0
ANKRD65	0.0763905	0.0493691	0.0413492	0.0247116	0.0767793	0.0305247
ANKRD66	0.00118796	0.0119926	0.0603761	0.0349481	0	0.000890054
ANKRD7	0.0201913	0.0219535	0.319296	0.0334948	0	0.0429713
ANKRD9	0.00366497	0.00251716	0.00401263	0.0137362	0.0113731	0.00394052
ANKS1A	0.303283	0.588824	0.38254	0.380364	0.487496	0.416267
ANKS1B	0.149118	0.17587	0.145996	0.111899	0.204763	0.140219
ANKS3	0.0354936	0.0548382	0.250769	0.0476049	0.0355996	0.059691
ANKS4B	0.00474293	0.00821453	0.099428	0.0116254	0.0154716	0.0155128
ANKS6	0.0771409	0.151832	0.121767	0.069457	0.0933756	0.0911249
ANKUB1	0	0.0236647	0.0912254	0.00607177	0.00188787	0.00236436
ANKZF1	0.26539	0.253558	0.333039	0.31538	0.377126	0.301839
ANLN	0.141938	0.0736873	0.175099	0.291649	0.23765	0.253157
ANO1	0.158035	0.182779	0.1822	0.304663	0.415174	0.385928
ANO1-AS2	0.0205861	0.0300878	0.131923	0.00448444	0.0159455	0.0290422
ANO10	0.334108	0.401649	0.765501	0.72441	0.614693	0.768704
ANO2	0.06288	0.132259	0.134193	0.0374451	0.0588009	0.0433796
ANO3	0.0452338	0.0544311	0.155982	0.430479	0.29206	0.269332
ANO4	0.052682	0.0300298	0.194372	0.03027	0.00944859	0.0304806
ANO5	0.0292351	0.0292654	0.145788	0.0885024	0.0841782	0.0327281
ANO6	0.842893	0.790959	0.686919	0.608243	0.541261	0.625724
ANO7	0	0.133168	0.204035	0.0103093	0.030098	0.0443544
ANO8	0.0190638	0.0605727	0.110034	0.0359628	0.0503605	0.0126879
ANO9	0.059695	0.0202971	0.202282	0.134266	0.0582447	0.0702424
ANP32A	0.622686	0.880857	0.763007	0.813254	0.830396	0.429396
ANP32A-IT1	0.0334233	0.0456929	0.0465194	0.0642765	0.0182793	0.0319329
ANP32AP1	0.388022	0.458779	0.431631	0.393305	0.361038	0.215358
ANP32B	2.41615	3.20329	3.49405	2.11731	3.25681	3.26593
ANP32C	0.281198	0.255883	0.220052	0.227841	0.282294	0.115894
ANP32D	0.0331258	0.0220627	0.0165762	0.032525	0	0.00717785
ANP32E	3.33765	4.63261	2.944	3.7868	4.19873	3.71148
ANPEP	1.19168	1.95337	1.81413	0.970286	0.974053	0.977758
ANTXR1	2.94657	2.70206	1.97478	1.26407	2.00442	1.52772
ANTXR2	0.500551	0.808304	0.627314	0.522811	0.587279	0.406888
ANTXRL	0	0.00276266	0.0951174	0.014084	0.00935681	0.0550721
ANTXRLP1	0.0415786	0.0295698	0.0683485	0.0264862	0.0021126	0.0389518
ANXA1	72.8225	36.6346	31.5096	46.5772	28.2124	40.0889
ANXA10	0.0712433	0.0302193	0.125854	0.0559995	0.012728	0.0247268
ANXA11	2.32335	2.19027	2.58768	1.55903	1.78314	1.90812
ANXA13	0.0017134	0.0271243	0.137678	0.0091154	0.0798422	0.0710607
ANXA2	62.9182	41.1161	47.1422	59.6991	39.0981	53.4883
ANXA2P1	0.583156	0.382272	0.396712	0.560829	0.35415	0.550654
ANXA2P2	118.235	70.8924	76.5424	110.608	65.4981	97.1986
ANXA2P3	0.343018	0.207956	0.233718	0.235691	0.208049	0.224994
ANXA2R	0.239997	0.351824	0.249634	0.191686	0.183684	0.153662
ANXA3	0.311171	0.369638	0.83853	1.63732	2.10731	2.55079
ANXA4	7.08917	5.49866	5.8947	5.72055	5.51764	7.95942
ANXA5	18.4934	31.8198	44.3979	28.5185	33.5235	47.774
ANXA6	1.27353	2.18915	1.73822	1.11489	2.07491	1.42033
ANXA7	7.18733	5.51083	4.78115	7.07982	5.38826	6.04934
ANXA8	0.362191	0.288167	2.56755	6.0313	1.49765	3.25095
ANXA8L1	0.398309	0.624532	3.80628	8.74349	2.17016	4.38421
ANXA9	0.100612	0.545665	0.310051	0.282174	0.211234	0.303292
AOAH	0.592181	0.383479	0.302735	0.565105	0.134198	0.0610522
AOAH-IT1	0.00338484	0.017799	0.0437753	0.0673353	0.00281255	0
AOC1	0.0838576	0.154965	0.248673	0.02164	0.0730178	0.123742
AOC2	0.0210031	0.0910233	0.0613467	0.0511097	0.0507349	0
AOC3	0.103523	0.436101	0.379628	0.225753	0.545717	0
AOC4P	0.00662615	0.0354143	0.0141371	0.0154635	0.0155928	0
AOX1	2.05222	2.00105	1.8724	1.60863	1.86527	1.9507
AOX2P	0.0335736	0.0555916	0.182902	0.0432808	0.03085	0.0423683
AP1AR	0.0677325	0.153629	0.164683	0.0532065	0.139169	0.203437
AP1B1	0.201928	0.307843	0.467176	0.27879	0.239713	0.327838
AP1B1P1	0.0107533	0	0.160068	0.0210599	0	0.0435178
AP1G1	0.641204	0.751214	0.560074	0.82105	0.78832	0.772562
AP1G2	1.76982	1.59484	1.65334	2.18424	1.76363	1.33828
AP1M1	0.0876557	0.0976274	0.13049	0.0824395	0.0848669	0.0784181
AP1M2	0.118322	0.0888803	0.659085	1.11076	0.734912	1.02795
AP1S1	0.156589	0.2084	0.442078	0.387039	0.358387	0.561658
AP1S2	1.03398	1.05017	0.898147	0.448419	0.76299	0.738252
AP1S3	0.0349512	0.0347077	0.145178	0.0342119	0.0522129	0.0467908
AP2A1	0.156259	0.280836	0.358096	0.188417	0.3093	0.222854
AP2A2	0.182946	0.498696	0.42402	0.160095	0.295211	0.497636
AP2B1	1.17416	1.33966	1.13913	1.1969	1.38479	0
AP2M1	10.7028	13.1288	13.5994	12.0097	12.0872	12.6087
AP2S1	0.160343	1.05506	1.91405	0.52419	1.5101	0.98569
AP3B1	0.846732	0.742628	0.78897	0.973216	0.920125	0.747212
AP3B2	0	0.00912353	0.0891328	0.048432	0.0317153	0.0638711
AP3D1	0.593338	0.369364	0.447734	0.46245	0.378051	0.357435
AP3M1	1.16702	1.21149	0.69964	1.20839	1.0845	0.985011
AP3M2	0.69682	0.780935	0.43598	0.469112	0.563098	0.504637
AP3S1	2.53513	2.04193	1.98663	1.9143	1.63183	2.29435
AP3S2	0.785803	0.596562	0.651345	0.907965	0.649052	0.890496
AP4B1	0.712513	0.94399	0.84052	0.563859	0.692184	0.543237
AP4B1-AS1	0.502145	0.405098	0.479582	0.326767	0.362508	0.189301
AP4E1	0.0666348	0.0958677	0.125627	0.111939	0.0605126	0.0437158
AP4M1	0.219344	0.229104	0.590436	0.447697	0.295807	0.345385
AP4S1	0.122805	0.109179	0.172663	0.137189	0.108266	0.111113
AP5B1	0.0675033	0.0468737	0.0646141	0.163568	0.048363	0.0832067
AP5M1	0.796914	0.542981	0.570365	1.24758	0.732245	1.17994
AP5S1	0.15974	0.183675	0.485503	0.138027	0.215619	0.214527
AP5Z1	0.0202236	0.0641955	0.120698	0.0679978	0.0504644	0.0768133
APAF1	0.130869	0.193705	0.218027	0.123344	0.175168	0.136777
APBA1	0.105745	0.211981	0.113861	0.142205	0.118669	0.0907504
APBA2	0.010052	0.0382523	0.162238	0.037512	0.0161288	0.0517164
APBA3	0.0153572	0.102069	0.0755417	0.0101973	0.0719721	0.0272147
APBB1	0.22438	0.331716	0.545748	0.271945	0.34859	0.218395
APBB1IP	0.231258	0.150361	0.234416	0.201024	0.16804	0.232813
APBB2	0.530744	0.560778	0.566397	0.258472	0.718933	0.362252
APBB3	0.0800437	0.249289	0.126793	0.0802374	0.164839	0.126934
APC	0.565562	0.393089	0.504703	0.448379	0.492628	0.348112
APC2	0.0222303	0.202737	0.106907	0.0889181	0.145645	0.021379
APCDD1	5.30235	5.02735	4.67251	0.707575	1.0709	1.04246
APCDD1L	0	0	0.00766426	0.0269036	0.0110034	0.0228825
APCDD1L-AS1	0.0411386	0.0155398	0.0927039	0.0453214	0.0644081	0.173451
APCS	0	0	0.0155059	0	0	0
APEH	0.526419	0.543397	0.775492	0.869626	0.738573	0.998497
APELA	0.244514	0.319024	0.156782	0.030442	0.0616686	0.0244765
APEX1	5.78502	5.15653	5.19121	5.67755	5.08751	5.36623
APEX2	0.635887	0.638475	0.669103	0.720041	0.467495	0.496168
APH1A	0.932332	0.97822	1.00204	1.10056	0.955779	0.920915
APH1B	0.872102	0.397251	0.329881	0.400591	0.419407	0.262135
API5	2.19689	1.86823	1.78083	2.28257	1.81504	2.02447
APIP	0.297298	0.6137	0.973335	0.582451	0.854873	1.27793
APITD1	0.0384748	0.269123	0.194449	0.106302	0.139027	0.0975366
APITD1-CORT	0.0592044	0.269123	0.214922	0.180166	0.162164	0.13634
APLF	0.110781	0.0852479	0.184594	0.115915	0.124491	0.0912266
APLN	0.0199433	0.0191794	0.0190593	0.00844691	0.0108606	0.0211231
APLNR	0.355378	1.12492	0.584278	0.413115	0.653673	0.278174
APLP1	0.141431	0.083237	0.241203	0.123048	0.0672786	0.101948
APLP2	3.28996	5.16177	4.31211	3.17446	4.20601	4.39258
APMAP	0.610957	0.912751	3.7603	2.39582	0.972576	5.35995
APOA1	0	0.00420253	0	0	0.00697724	0
APOA1BP	0.492478	0.432871	0.494978	0.567358	0.490563	0.651358
APOA2	0.0281236	0	0.082923	0.0219059	0.0323106	0.0194645
APOA4	0	0.00259338	0.0179045	0	0	0
APOA5	0	0	0	0.000891343	0	0
APOB	0.0378487	0.0451247	0.131419	0.0474572	0.0538306	0.0351281
APOBEC1	0	0.0153009	0.163366	0	0	0.0426364
APOBEC2	0.175465	0.266805	0.244756	0.17862	0.285098	0.0713123
APOBEC3A	0.0866161	0.081385	0.0990873	0.286272	0.19689	0.0992441
APOBEC3A_B	0.10117	0.081385	0.0990873	0.286272	0.19689	0.144531
APOBEC3B	0.202352	0.103306	0.384418	0.56543	0.364469	0.244449
APOBEC3B-AS1	0.166611	0.0793097	0.210622	0.536283	0.297763	0.263398
APOBEC3C	5.88313	5.17001	4.66503	5.01314	3.34201	3.95103
APOBEC3D	0.498602	0.809671	0.58466	0.379007	0.52764	0.457553
APOBEC3F	0.389187	0.288631	0.208543	0.12706	0.154326	0.228871
APOBEC3G	0.675795	0.762822	0.336767	0.431636	0.474527	0.302116
APOBEC3H	0.110444	0.066304	0.243724	0.089672	0.0497154	0.0235389
APOBEC4	0.0253584	0.0383155	0.013242	0.0267051	0.00398638	0.0271323
APOBR	0.0899651	0.137368	0.165976	0.0420417	0.0233867	0.0150091
APOC1	0.96011	3.04241	13.7104	11.3822	3.7327	22.2143
APOC1P1	0.235216	0.252269	0.463455	0.460453	0.234285	0.993429
APOC2	0.044103	0.0187972	0.188884	0.0496617	0.073449	0.043347
APOC3	0	0.00397426	0.0148794	0	0	0
APOC4	0.0381196	0.0249872	0.0700011	0.0106411	0.0438501	0.0160137
APOC4-APOC2	0.044103	0.0187972	0.188884	0.0496617	0.073449	0.043347
APOD	68.0262	159.745	99.6581	100.748	150.001	100.065
APOE	0.372425	0.731639	0.774435	1.01177	0.513047	0.821225
APOF	0.00524329	0	0.0878574	0.00280451	0.00637651	0.00747037
APOH	0	0	0.200611	0.0530489	0.0126552	0
APOL1	2.08926	0.792312	0.658519	0.704033	0.540279	0.410749
APOL2	2.09495	2.39914	1.82845	1.78376	2.01448	1.70986
APOL3	1.74853	2.4597	1.3392	1.29227	1.68577	1.1393
APOL4	0.595539	0.862275	0.66495	0.710864	0.631667	0.667294
APOL5	0.0125926	0.0306018	0.28385	0.0645412	0.0478428	0.0788829
APOL6	0.979395	0.532249	0.591465	0.561711	0.782455	0.415605
APOLD1	2.60319	0.516252	0.439817	2.11478	0.326618	0.323729
APOM	0.0536969	0.0244196	0.0623892	0.098231	0.0270865	0.0245483
APOO	0.214232	0.29008	0.28686	0.443582	0.552616	0.751822
APOOL	0.809445	0.609713	0.695155	0.797655	0.619762	0.947477
APOOP5	0.111212	0.0978036	0.182698	0.216916	0.234134	0.289814
APOPT1	0.326061	0.289866	0.44257	0.264894	0.449845	0.39118
APP	2.5293	2.55203	1.98021	2.62803	2.54595	2.44207
APPBP2	0.349972	0.372589	0.382913	0.297549	0.32089	0
APPL1	0.852589	0.704883	0.732049	0.498322	0.691545	0.353749
APPL2	0.905452	0.817337	0.860894	0.932563	0.813069	1.01401
APRT	0.681358	1.09431	1.77754	0.630519	1.41021	1.18206
APTR	0.317705	0.77878	0.463954	0.395059	0.670133	0.42144
APTX	1.39479	0.95479	1.00472	1.36116	0.937659	1.14793
AQP1	7.00022	8.49098	6.25702	4.44822	4.50465	4.2158
AQP10	0.0028885	0.0192053	0.274163	0.0783889	0.0128742	0.0224511
AQP11	0.0538682	0.0351097	0.0310412	0.0541373	0.0246432	0.0335374
AQP12A	0	0	0	0	0	0.00317235
AQP12B	0	0	0.00351005	0	0	0
AQP2	0.000796538	0.00507395	0.000741982	0.00165559	0.00242803	0.00226056
AQP3	0.214497	0.291325	1.09257	0.781112	1.08377	1.62781
AQP4	0.128035	0.0027532	0.0450233	0.178812	0.0520164	0.0378492
AQP4-AS1	0.0171854	0.00826084	0.120209	0.027813	0.024253	0.0291575
AQP5	0.00800811	0.0523013	0.0427853	0.352683	0.862008	1.58086
AQP6	0	0.0196456	0.0221866	0.00163548	0.0248403	0.0339055
AQP7	0.025176	0.0722231	0.28778	0.0259091	0.0927967	0.136745
AQP7P1	0.0739979	0.0317788	0.872308	0.0838246	0.125961	0.191749
AQP7P3	0.0245127	0.00599509	0.100955	0.111698	0.048437	0.129634
AQP8	0.0841775	0.0739002	0.223093	0.0473549	0.0442473	0.0349055
AQP9	0.2869	0.0525706	0.171165	0.547658	0.120202	0.0641331
AQPEP	0.185782	0.496713	0.335787	0.382859	0.169716	0.446756
AQR	0.828639	0.849798	0.805481	0.659791	0.620912	0.670114
AR	0.34403	0.324239	0.405601	0.288713	0.429798	0.439047
ARAF	0.239797	0.745249	0.775038	0.795484	0.779744	0.858731
ARAP1	0.441516	0.913412	0.637607	0.347685	0.682615	0.572404
ARAP2	0.209302	0.182387	0.230486	0.282722	0.327059	0.213905
ARAP3	0.245588	0.19257	0.31807	0.0787459	0.106003	0.12806
ARC	0.0347497	0.0705647	0.0304785	0.0904009	0.0391558	0.0416412
ARCN1	2.1327	2.1578	1.80178	2.40125	1.99977	2.15782
AREG	0.314348	0.129785	0.234896	0.450942	0.23905	0.427851
AREL1	0.317229	0.159413	0.254987	0.27628	0.245309	0.243975
ARF1	1.94083	2.77448	3.5889	1.2671	3.61055	2.02461
ARF3	0.561373	0.558526	0.574067	0.682521	0.502968	0.499895
ARF4	15.9754	7.90611	9.84652	11.1191	9.02027	12.2628
ARF5	1.40583	1.50678	2.19563	1.30336	1.41876	1.78828
ARF6	3.18775	2.73632	2.11488	3.16536	2.71953	3.2433
ARFGAP1	0.0637783	0.0854776	0.104951	0.0745876	0.11786	0.0655086
ARFGAP2	1.80406	2.30017	2.1303	2.3636	1.79358	2.26924
ARFGAP3	3.60763	1.9652	1.8658	3.52187	2.32406	2.4755
ARFGEF1	0.481895	0.626016	0.407981	0.404615	0.370019	0.47186
ARFGEF2	0.288157	0.476501	0.460641	0.519381	0.389499	0.45185
ARFIP1	1.14385	0.938269	0.765293	0.949895	0.897347	1.13202
ARFIP2	0.32689	0.154891	0.225648	0.203501	0.203608	0.395179
ARFRP1	0.0359304	0.0472049	0.103009	0.0339896	0.0422652	0.0392038
ARG1	0.127777	0.0563828	0.283685	0.980993	0.113581	0.240875
ARG2	0.479743	0.564347	0.406446	0.340018	0.719892	0.553651
ARGFX	0.00475613	0.00259394	0.0366665	0.0034474	0.0167048	0.00559404
ARGFXP2	0	0.00569336	0.049862	0.0625764	0.012206	0
ARGLU1	3.70905	3.74918	2.84605	2.83616	3.36517	3.72234
ARHGAP1	2.62924	3.57032	3.85832	3.80558	3.55913	3.31761
ARHGAP10	0.386154	0.841693	0.747521	0.357535	0.595966	0.456975
ARHGAP11A	0.0635941	0.0608506	0.0640117	0.0409809	0.0239756	0.0539022
ARHGAP11B	0.0401287	0.0213371	0.0775297	0.0194848	0.0584026	0.0376322
ARHGAP12	0.854161	0.886611	0.582624	0.491648	0.759491	0.847966
ARHGAP15	1.64472	1.56422	1.34973	0.847448	1.1024	0.940081
ARHGAP17	0.647062	0.915822	0.651031	0.687184	0.725731	0.620165
ARHGAP18	2.97267	1.16727	2.02959	1.50586	1.4491	1.49206
ARHGAP19	0.58804	0.672094	0.606809	0.417548	0.495625	0.407972
ARHGAP19-SLIT1	0.58804	0.672094	0.606809	0.417548	0.495625	0.407972
ARHGAP20	0.0524796	0.10561	0.109912	0.0439352	0.0516301	0.0546783
ARHGAP21	1.15546	0.911047	0.747064	0.953935	1.15484	0.966193
ARHGAP22	0.0533937	0.0317333	0.058018	0.01979	0.0435027	0.013636
ARHGAP23	0.229679	0.164818	0.245643	0.168086	0.155485	0
ARHGAP24	0.833781	0.532201	0.467821	0.45581	0.585593	0.263512
ARHGAP25	0.48504	0.8829	0.599437	0.631325	0.413958	0.513774
ARHGAP26	0.300188	0.355407	0.26714	0.31298	0.356238	0.275129
ARHGAP26-AS1	0.00512301	0.00956307	0.145198	0.00804047	0.0114392	0.0480595
ARHGAP27	0.0486899	0.0376339	0.0984131	0.0405639	0.0295927	0
ARHGAP28	0.0816621	0.212065	0.224428	0.158652	0.224426	0.0969166
ARHGAP29	0.840615	0.655426	0.512988	0.673291	0.471513	0.51448
ARHGAP30	0.272	0.358803	0.276819	0.301137	0.248242	0.207936
ARHGAP31	0.235456	0.330512	0.215835	0.132933	0.207207	0.0845725
ARHGAP31-AS1	0.109402	0.113458	0.00216715	0.0275095	0.0379798	0.0632545
ARHGAP32	0.385081	0.227585	0.454883	0.427874	0.281327	0.341942
ARHGAP33	0.0114076	0.0276039	0.050915	0.0469404	0.0263537	0.00908902
ARHGAP35	0.120832	0.16124	0.237223	0.106721	0.208905	0.169684
ARHGAP36	0.030843	0.0674587	0.175376	0.037895	0.0342872	0.0296757
ARHGAP39	0	0.0209477	0.2692	0.0399526	0.0181687	0.0262248
ARHGAP4	0.0991754	0.116177	0.222727	0.0931563	0.0824498	0.0640636
ARHGAP40	0.00168281	0.0287899	0.197094	0.125639	0.0689353	0.137333
ARHGAP42	0.106268	0.0791475	0.133873	0.0533452	0.112856	0.102954
ARHGAP44	0.0256521	0.0586598	0.104715	0.0380534	0.0451481	0.115434
ARHGAP5	0.635602	0.868414	0.530036	0.775944	1.19247	0.914596
ARHGAP5-AS1	0.0635016	0.231389	0.155685	0.242479	0.381531	0.190394
ARHGAP6	0.381849	0.325909	0.242926	0.257673	0.282677	0.290194
ARHGAP8	0.0848134	0.0352086	0.312355	0.529434	0.0877003	0.226574
ARHGAP9	0.0822339	0.192777	0.132968	0.0921119	0.0909484	0.0452234
ARHGDIA	0.208689	0.487032	0.715732	0.275034	0.552503	0
ARHGDIB	29.3817	19.1172	17.1144	16.5	10.9914	10.5525
ARHGDIG	0.00383732	0	0.0356883	0	0	0.0142121
ARHGEF1	0.135254	0.208937	0.253011	0.104901	0.118626	0.0681611
ARHGEF10	0.194349	0.272455	0.418026	0.241992	0.34043	0.187723
ARHGEF10L	0.143343	0.117272	0.173415	0.150658	0.123251	0.152891
ARHGEF11	0.253047	0.208242	0.424978	0.210536	0.226495	0.208418
ARHGEF12	0.468509	0.420775	0.659648	0.486175	0.588482	0.47062
ARHGEF15	0.142012	0.363203	0.218935	0.150148	0.18962	0.0905589
ARHGEF16	0	0.0105682	0.0565757	0.0286426	0.0278823	0.024071
ARHGEF17	0.238889	0.231753	0.279832	0.135609	0.296301	0.120973
ARHGEF18	0.0546651	0.0693113	0.15808	0.0309632	0.0611955	0.0721932
ARHGEF19	0.13665	0.335562	0.156551	0.339912	0.232923	0.201697
ARHGEF2	0.238403	0.317731	0.238276	0.222563	0.402182	0.249612
ARHGEF25	0.115728	0.223254	0.0810992	0.113644	0.17738	0.0825913
ARHGEF26	0.205971	0.220579	0.255848	0.337746	0.366109	0.314608
ARHGEF26-AS1	0.0142101	0.0374267	0.0563203	0.0426372	0.0588845	0.0827147
ARHGEF28	0.0740973	0.122283	0.175849	0.165685	0.214053	0.160615
ARHGEF3	1.36572	1.08015	0.791123	0.96694	1.08552	0.655659
ARHGEF3-AS1	0	0.0112095	0.00965571	0.0306683	0.021753	0.00301943
ARHGEF33	0.0228454	0.0357021	0.0775297	0.0408186	0.012246	0.0631087
ARHGEF34P	0.122707	0.0714043	0.220743	0.144357	0.103405	0.264978
ARHGEF35	0.0353067	0.0730051	0.0744799	0.112525	0.0894336	0.094983
ARHGEF37	0.0524114	0.157774	0.181368	0.166789	0.229434	0.104907
ARHGEF38	0.020254	0.0387692	0.141265	0.188785	1.09973	0.641333
ARHGEF38-IT1	0	0	0.0326154	0	0.0653978	0.0497853
ARHGEF39	0.0961325	0.105587	0.238489	0.105643	0.0802604	0.0956474
ARHGEF4	0.00452338	0.017001	0.218548	0.0619962	0.0565642	0.103737
ARHGEF40	0.252476	0.193345	0.267289	0.244343	0.222316	0.147235
ARHGEF5	0.081364	0.098197	0.214879	0.174052	0.238351	0.219204
ARHGEF6	0.683699	0.550739	0.41602	0.43725	0.414445	0.376717
ARHGEF7	0.243687	0.339681	0.251595	0.247394	0.409431	0.281456
ARHGEF7-AS1	0.153418	0.703842	0.26877	0.0855127	0.161619	0.327945
ARHGEF9	0.426686	0.336419	0.325896	0.545475	0.634349	0.308609
ARHGEF9-IT1	0.0522564	0.000308486	0.181257	0.00912247	0.00806637	0.00632732
ARID1A	0.624455	1.11478	0.794035	0.639037	0.87226	0.719835
ARID1B	0.938745	0.873728	0.814143	0.889267	0.968218	0.823959
ARID2	0.995305	0.798424	0.725951	0.826172	0.884359	0.860611
ARID3A	0.0318493	0.0301061	0.0897218	0.0327161	0.0225262	0.0301279
ARID3B	0.0927397	0.0959785	0.124722	0.0215048	0.038092	0.035302
ARID3C	0	0	0.120743	0.0269067	0.0190713	0.0262135
ARID4A	1.18154	1.8557	1.2055	0.967206	1.43554	1.13599
ARID4B	1.41337	2.21176	1.2231	0.867533	2.02979	1.46391
ARID5A	0.12936	0.149732	0.111112	0.0619392	0.12394	0.0799988
ARID5B	17.9792	12.9798	13.6345	14.9834	10.1639	9.87631
ARIH1	0.494236	0.814055	0.410026	0.560342	0.79407	0.784183
ARIH2	0.572395	0.561753	0.520288	0.679898	0.665987	0.607035
ARIH2OS	0.0145024	0.0963632	0.0953191	0.0976956	0.0791623	0.0664449
ARL1	4.65134	3.60384	3.3202	4.67858	3.62644	4.84737
ARL10	0.002424	0.02895	0.0362061	0.0244258	0.0578736	0.0202917
ARL11	0.00770545	0.016883	0.0420187	0.0345032	0.00736506	0.0203991
ARL13A	0	0	0.0642979	0.00931385	0	0.0259798
ARL13B	0.488581	0.929086	0.69664	0.589033	0.805226	0.849589
ARL14	0	0.00190073	0.0784125	0.0162866	0.035903	0.00845225
ARL14EP	2.50309	1.85232	1.36176	1.63368	1.52266	1.2048
ARL14EPL	0.0214322	0.0170496	0.025474	0.0098042	0	0.0156926
ARL15	1.07542	0.627021	0.554207	0.614481	0.705619	0.60507
ARL16	0.464713	1.16407	0.961549	0.565842	1.04866	0
ARL17A	0.415074	0.588648	0.373065	0.357241	0.365925	0
ARL17B	0.323021	0.295818	0.2731	0.232206	0.286676	0
ARL2	0.826012	3.41614	4.1522	2.68502	3.29871	3.02379
ARL2-SNX15	0.779435	3.41614	4.1522	2.68502	3.29871	3.02379
ARL2BP	2.10203	1.19834	1.22651	1.32566	1.19818	1.69905
ARL3	4.11814	3.37352	2.91098	2.23917	2.51535	2.71941
ARL4A	1.30873	2.3041	1.02753	1.63849	2.26105	1.77461
ARL4C	0.86863	1.05857	0.616511	0.450584	0.65186	0.447685
ARL4D	0.0476855	2.22579	1.00694	0.231209	2.53733	0
ARL5A	0.379384	0.406392	0.432795	0.483614	0.340731	0.429106
ARL5B	0.357916	0.3081	0.278768	0.157801	0.270898	0.196407
ARL5C	0	0.0494178	0.103373	0.0549802	0.0191764	0
ARL6	0.219175	0.232694	0.185772	0.261756	0.260094	0.190632
ARL6IP1	12.8945	15.3624	12.8734	13.6387	16.9269	16.7313
ARL6IP4	0.185346	0.738711	1.24346	0.375647	0.849303	0.881346
ARL6IP5	34.5778	32.4424	22.5728	27.4829	26.1951	33.1888
ARL6IP6	0.121554	0.169806	0.153293	0.0990052	0.179266	0.196056
ARL8A	0.0670357	0.169039	0.106484	0.128164	0.129552	0.15318
ARL8B	0.699615	0.629327	0.790828	0.810075	0.842687	1.16702
ARL9	0.106231	0.0836086	0.17678	0.0430837	0.130974	0.149707
ARMC1	0.323241	0.706622	0.797498	0.460792	0.791182	0.709206
ARMC10	0.190568	0.240352	0.320597	0.178887	0.16932	0.245752
ARMC12	0.0499248	0	0.0494586	0.0528855	0.0911328	0.0131503
ARMC2	0.207836	0.160982	0.175343	0.149326	0.197617	0.181701
ARMC2-AS1	0.0371706	0.0128965	0.169483	0.0957377	0.026847	0.00941202
ARMC3	0.0142245	0.0330999	0.120533	0.109343	0.0244642	0.057105
ARMC4	0.023364	0.0264664	0.153788	0.0477576	0.024133	0.0148582
ARMC5	0.0336312	0.041252	0.0133649	0.0254453	0.0381381	0.0238305
ARMC6	0.0338908	0.0505552	0.336874	0.0970187	0.111592	0.0635728
ARMC7	0.0386011	0.0493982	0.0696255	0.0968009	0.0637784	0
ARMC8	1.05387	1.02538	0.637948	0.682156	0.905915	0.844462
ARMC9	0.0850396	0.173369	0.208402	0.123907	0.118724	0.120157
ARMCX1	0.484063	1.12014	0.637672	0.460517	0.755767	0.723062
ARMCX2	0.109566	0.316366	0.177282	0.205205	0.313102	0.297725
ARMCX3	1.13638	1.48492	1.44036	0.879374	1.61611	1.24274
ARMCX4	0.214074	0.372098	0.424851	0.286164	0.241073	0.236765
ARMCX5	1.02153	0.789235	0.888931	1.0511	0.818689	1.12851
ARMCX5-GPRASP2	0.968024	0.74279	0.860042	1.00717	0.773682	1.07634
ARMCX6	1.15116	0.947046	1.25019	1.21533	1.03302	1.09763
ARMS2	0.0319886	0.020373	0.0869532	0.0576133	0.0140455	0.0147225
ARNT	2.90373	3.0219	2.32589	1.81554	2.12347	1.6225
ARNT2	0.0779027	0.0526039	0.261451	0.0265709	0.026386	0.0326745
ARNTL	0.194936	0.323306	0.205806	0.264552	0.295731	0.19634
ARNTL2	0.0795396	0.0471369	0.144432	0.0648419	0.0349011	0.0893904
ARNTL2-AS1	0.0307022	0	0.130902	0.00350495	0.00026376	0.0164861
ARPC1A	1.94373	2.72822	3.06296	3.47762	2.72504	3.13429
ARPC1B	1.30736	1.30737	1.74969	0.880802	0.965687	1.04453
ARPC2	6.51099	5.85343	7.35125	5.95465	5.21761	6.41615
ARPC3	8.58991	5.57684	5.50543	6.42505	4.82415	6.61996
ARPC4	7.58888	7.80432	8.12481	7.22759	6.46756	8.09221
ARPC4-TTLL3	2.59923	1.99773	2.03677	2.53653	1.83328	2.46225
ARPC5	5.85617	5.1017	5.21978	6.0824	4.98347	4.46884
ARPC5L	0.488414	0.23093	0.644071	0.539759	0.447805	0.635099
ARPIN	0.286758	0.242963	0.289133	0.206217	0.20195	0.191732
ARPP19	1.4654	1.33383	1.01067	1.34848	1.29389	1.46957
ARPP21	0.0330188	0.0408024	0.116217	0.0303347	0.0250572	0.0284243
ARR3	0.0247857	0.0276874	0.290736	0.03027	0.0668193	0.086623
ARRB1	0.857669	0.820812	0.673048	0.566405	0.63667	0.398249
ARRB2	0.632105	0.645809	0.501638	0.351732	0.440307	0.364958
ARRDC1	0.0323099	0.0351868	0.0745582	0.0290294	0.0441339	0.0335743
ARRDC1-AS1	0.0319277	0.0107706	0.0622262	0.0135134	0.0211168	0.0371513
ARRDC2	0.678266	0.953594	0.589713	0.392707	0.533928	0.385991
ARRDC3	9.6019	19.7738	8.8883	6.09848	11.3222	9.90915
ARRDC3-AS1	0.0882503	0.0519649	0.0524465	0.0211576	0.0537343	0.0579797
ARRDC4	0.257795	0.332874	0.267508	0.249688	0.509458	0.332128
ARRDC5	0.0321321	0.0261609	0.204837	0.0383101	0.0263464	0.0178621
ARSA	0.0511682	0.0343551	0.102582	0.0567269	0.0340874	0.111516
ARSB	0.340747	0.209018	0.205528	0.221329	0.140496	0.155192
ARSD	0.465025	0.440606	0.498006	0.355646	0.382973	0.374028
ARSE	0.0506718	0.0897276	0.318592	0.0881296	0.0382776	0.0666743
ARSF	0.0293423	0.0100589	0.183715	0.126742	0.0497037	0.0852729
ARSG	0.34304	0.26331	0.27589	0.0934422	0.200182	0
ARSH	0.0111688	0.0198345	0.263489	0.082639	0.0108581	0.0142993
ARSI	0.0115861	0.0403345	0.0110122	0.0386086	0.0011053	0
ARSJ	0.060014	0.106628	0.053294	0.0712576	0.150258	0.0651949
ARSK	0.0555605	0.0806167	0.0580434	0.057866	0.0972628	0.0811549
ART1	0.0065879	0.0153009	0	0.0217013	0.0053694	0.0103639
ART3	0.185192	0.292676	0.219276	0.222816	0.295475	0.190215
ART4	0.448829	0.325999	0.10443	0.159185	0.219472	0.028725
ART5	0.0239642	0.0827287	0.0448667	0.0199698	0.0253182	0.0231441
ARTN	0.0152867	0.0203686	0.023984	0	0.00226823	0
ARV1	0.39121	0.512166	0.712917	0.870822	0.617482	0.826965
ARVCF	0.0344265	0.021492	0.0226695	0.023936	0.0304742	0.0301495
ARX	0.00600368	0	0.0203555	0.00249136	0.00480521	0.00264358
AS3MT	0.162626	0.241587	0.492562	0.389608	0.209952	0.305309
ASAH1	1.02409	1.40494	1.59728	0.830345	1.7728	1.52444
ASAH2	0.0803028	0.0339507	0.0525576	0.0641952	0.0623121	0.0368877
ASAH2B	0.212096	0.0437169	0.0974505	0.170117	0.148506	0.0941791
ASAP1	1.02444	0.622856	0.621759	0.644989	0.493792	0.450816
ASAP1-IT1	0.101581	0.0464608	0.0244623	0.0335435	0.0469265	0.0449147
ASAP1-IT2	0.160802	0.107483	0.219241	0.140709	0.0426812	0.0694653
ASAP2	0.540139	0.405106	0.508704	0.442763	0.386774	0.367926
ASAP3	0.345217	0.476957	0.407295	0.458298	0.597206	0.551915
ASB1	0.186287	0.114678	0.274448	0.0483149	0.0727698	0.0980123
ASB10	0	0.00176988	0	0.00659105	0	0
ASB11	0.0823633	0.0135385	0.0673323	0.0338646	0.029129	0.0428141
ASB12	0.0145336	0.0198857	0.00613281	0.0456909	0.03546	0.020523
ASB13	0.0647649	0.188169	0.200242	0.109066	0.174449	0.165254
ASB14	0.106159	0.124593	0.221138	0.144213	0.126506	0.0540569
ASB15	0.064897	0.156763	0.141897	0.145279	0.105079	0.0852861
ASB16	0.0107133	0.00199825	0.126034	0.0563609	0.00769301	0
ASB16-AS1	0.150582	0.228114	0.260166	0.291621	0.216638	0
ASB17	0.0120202	0	0.0561912	0	0	0
ASB18	0	0	0.0997458	0	0.0123265	0
ASB2	0.00431135	0.12059	0.256779	0.00809546	0.0647964	0.0162342
ASB3	0.881657	1.51075	0.744805	0.75236	0.967859	0.843419
ASB4	0.0828282	0.00609561	0.281433	0.0614481	0.0194611	0.0498846
ASB5	0.0375064	0.0135796	0.101758	0.0155134	0	0.0271807
ASB6	0.141527	0.223916	0.225179	0.144949	0.270389	0.198461
ASB7	0.0866364	0.126793	0.275201	0.144129	0.106376	0.114888
ASB8	1.64551	1.18371	1.43984	1.26168	1.07281	1.14184
ASB9	0.616861	0.39368	0.273104	0.199277	0.11465	0.277211
ASB9P1	0.165653	0.0872011	0.0810603	0.093688	0.0322352	0.0652009
ASCC1	3.124	3.15322	3.32849	2.42712	2.94587	3.60247
ASCC2	0.328814	0.341712	0.699089	0.467244	0.399157	0.508879
ASCC3	0.311903	0.316874	0.281978	0.201508	0.21591	0.333505
ASCL1	0	0.000781605	0.00422889	0	0	0
ASCL2	0.00429086	0	0.015736	0.0096248	0.00756895	0.0110037
ASCL3	0	0.00191261	0.060401	0	0	0.00273855
ASCL4	0	0	0	0.00133938	0.0067078	0
ASCL5	0	0	0	0	0	0
ASF1A	0.057482	0.331872	0.182071	0.0946601	0.219143	0.170136
ASF1B	0.0218076	0.0787522	0.231859	0.0675517	0.0361702	0.00833126
ASGR1	0.0212782	0.160302	0.189104	0.0574086	0.0338771	0.0426364
ASGR2	0.189254	0.00908492	0.147089	0.15374	0.0501144	0.0220487
ASH1L	1.7993	2.08228	1.08103	1.22346	1.7	1.0862
ASH1L-AS1	0.0589913	0.107122	0.0943067	0.0537817	0.073124	0.0578544
ASH2L	0.255004	0.535532	0.454327	0.406032	0.439927	0.357268
ASIC1	0.00697301	0.0488555	0.0704424	0.0162129	0.0646568	0.03644
ASIC2	0.0144905	0.0130716	0.112691	0.0133614	0.00639868	0
ASIC3	0	0.0587173	0.0213488	0.0212219	0.0418305	0.0641488
ASIC4	0	0	0.0443027	0	0.002983	0
ASIC5	0.0191992	0.0242872	0.00803235	0	0	0
ASIP	0.101377	0.218083	0.0988123	0.0398852	0.0865948	0.129999
ASL	0.101417	0.545399	0.83761	0.340357	0.365086	0.52041
ASMT	0.128936	0.0708158	0.221453	0.0442408	0.075011	0.036988
ASMTL	0.202027	0.297213	0.359007	0.0475179	0.157482	0.224519
ASMTL-AS1	0.0447513	0.139175	0.21241	0.0170723	0.0689932	0.15244
ASNA1	2.78589	2.91189	3.37528	3.77656	2.73112	3.98769
ASNS	0.369324	0.685498	0.339218	0.416153	0.572721	0.296316
ASNSD1	2.06084	2.10222	1.49476	1.35342	1.92805	1.31965
ASPA	0.428056	0.588251	0.334587	0.293871	0.460825	0.272647
ASPDH	0	0	0	0	0.0113766	0.0106183
ASPG	0.00521213	0	0.0436253	0.0951227	0.00451299	0.0418723
ASPH	1.05826	1.28336	0.957602	0.796844	1.44759	1.14634
ASPHD1	0.0253944	0.0222803	0.0788898	0.0414221	0	0.0415144
ASPHD2	0.125644	0.0652285	0.0866342	0.05599	0.0673446	0.0529469
ASPM	0.0402079	0.0278392	0.116084	0.0692051	0.0881179	0.113781
ASPN	0.585064	1.12296	0.705503	4.53527	2.20986	2.20246
ASPRV1	0.0906411	0.104566	1.5301	9.07672	0.347753	0.89326
ASPSCR1	0.00738512	0.0538628	0.0802186	0.015135	0.0488184	0
ASRGL1	0.060991	0.0490156	0.176274	0.0766372	0.0881126	0.137768
ASS1	1.65802	1.06896	1.69485	2.0164	0.972326	1.60825
ASTE1	1.22016	1.18449	0.825665	0.976671	0.876428	0.965483
ASTL	0.112744	0.175214	0.0445383	0.0778371	0.0388081	0.0777542
ASTN1	0.112562	0.0680753	0.195279	0.06485	0	0.0217302
ASTN2	0.238789	0.163614	0.297618	0.0425272	0.284518	0.268254
ASTN2-AS1	0.0221262	0.0491704	0.247595	0.015135	0.0309591	0.0366985
ASUN	0.31096	0.506814	0.572758	0.2778	0.786482	0.550283
ASXL1	0.494666	0.700524	0.394187	0.401898	0.416916	0.252394
ASXL2	0.33481	0.316017	0.372552	0.216727	0.311341	0.268483
ASXL3	0.0273893	0.0176873	0.219312	0.0417948	0.056781	0.0453746
ASZ1	0.0242041	0.019406	0.12737	0.0579511	0.0267119	0.0101515
ATAD1	0.945592	1.03019	0.71551	1.32126	0.926688	1.09066
ATAD2	0.11143	0.130742	0.217503	0.210258	0.182463	0.130103
ATAD2B	0.289555	0.355783	0.208006	0.261997	0.15752	0.16396
ATAD3A	0.0264318	0.0132731	0.0856518	0.0281249	0.0190067	0.0297112
ATAD3B	0.012117	0.0753985	0.10005	0.0624859	0.0405293	0.0284243
ATAD3C	0.104203	0.11564	0.180335	0.103106	0.102008	0.0815577
ATAD5	0.0640813	0.132946	0.197247	0.102876	0.0808999	0
ATAT1	0.00395747	0.0159077	0.0574294	0.0215674	0.0574228	0.0286217
ATCAY	0.0549812	0.0440481	0.199698	0.0229127	0.0125286	0.0428925
ATE1	0.282497	0.319142	0.390475	0.293714	0.246473	0.295045
ATE1-AS1	0.0956959	0.108764	0.103949	0.0587126	0.0725582	0.0805648
ATF1	0.581778	0.879844	0.628993	0.626903	0.818353	0.665484
ATF2	1.704	1.96074	1.17283	1.23312	1.67169	1.29037
ATF3	2.6527	4.3022	3.73198	4.13798	8.08506	6.20716
ATF4	4.97536	9.18639	8.14342	6.25031	9.22895	8.49729
ATF5	0.269144	0.355274	0.492369	0.275667	0.452262	0.255012
ATF6	1.67665	1.34662	1.15113	2.15568	1.13183	0.957294
ATF6B	0.441806	0.530694	0.457197	0.331412	0.362869	0.338374
ATF7	1.22309	1.29016	0.871286	1.44011	1.17864	1.2349
ATF7IP	0.529584	0.751852	0.716292	0.472383	0.787048	0.754823
ATF7IP2	0.336815	0.115559	0.154674	0.213448	0.181384	0.174517
ATG10	0.358855	0.188451	0.275853	0.482302	0.299025	0.259253
ATG101	0.559455	0.855601	0.58777	0.673678	0.88452	0.848125
ATG12	1.37454	0.931799	0.866923	0.972735	0.701358	0.9779
ATG13	0.556704	1.06428	1.00528	1.41595	0.913281	0.882502
ATG14	0.228707	0.20869	0.16142	0.176649	0.167066	0.144522
ATG16L1	0.273413	0.280639	0.370316	0.22203	0.376989	0.445257
ATG16L2	0.210991	0.351621	0.340958	0.277111	0.229541	0.127354
ATG2A	0.0351819	0.0429532	0.224038	0.160921	0.106585	0.0592592
ATG2B	0.174557	0.392111	0.169265	0.20196	0.181039	0.208824
ATG3	1.56316	1.8703	1.80095	1.52899	1.71994	2.02563
ATG4A	0.480945	0.303922	0.26134	0.502876	0.341362	0.308678
ATG4B	0.127173	0.281599	0.22293	0.217677	0.243612	0.231127
ATG4C	0.901787	0.919457	0.557137	0.550605	0.691893	0.370761
ATG4D	0.0818517	0.180318	0.183875	0.161992	0.147949	0.163057
ATG5	0.313769	0.425015	0.365927	0.194094	0.339383	0.373009
ATG7	0.997744	0.798865	0.531575	0.841102	0.507102	0.455955
ATG9A	0.246938	0.336164	0.423559	0.323477	0.452338	0.253898
ATG9B	0.21159	0.110015	0.17599	0.20451	0.0512534	0.107824
ATHL1	0.198582	0.248907	0.303025	0.164802	0.244712	0.0630578
ATIC	0.800037	0.934706	0.811873	0.881055	1.22821	1.1007
ATL1	0.364104	0.604315	0.483364	0.455346	0.589512	0.58635
ATL2	0.218046	0.352083	0.351316	0.439265	0.758364	0.954299
ATL3	2.27972	2.20631	1.68315	2.09884	2.03313	2.462
ATM	0.47466	0.50883	0.494062	0.377188	0.555558	0.419119
ATMIN	0.346278	0.237018	0.284609	0.313366	0.281163	0.276356
ATN1	0.471009	0.653016	0.816152	0.54794	0.69975	0.336667
ATOH1	0	0	0	0	0	0
ATOH7	0	0.00161168	0.00714559	0	0	0
ATOH8	0.135973	0.196202	0.204323	0.111857	0.0648486	0.100638
ATOX1	7.61552	5.77328	6.93468	7.67353	7.4385	7.5789
ATP10A	0.257353	0.175729	0.604771	0.227347	0.251332	0.16387
ATP10B	0.00381564	0.0138494	0.184509	0.0813583	0.0683108	0.0726987
ATP10D	0.713228	0.698661	0.750471	0.712656	0.642116	0.760741
ATP11A	0.0765098	0.0791276	0.286491	0.136033	0.0741276	0.0646208
ATP11A-AS1	0.0280895	0.0983191	0.100467	0.0562624	0.0114405	0.0133275
ATP11AUN	0	0	0.0354078	0.0044762	0	0
ATP11B	0.374023	0.236251	0.360455	0.358044	0.289093	0.287955
ATP11C	0.615404	0.405828	0.273564	0.267852	0.233345	0.255819
ATP12A	0.052639	0.0244815	0.401694	0.517648	0.0189157	0.147695
ATP13A1	0.0775886	0.199337	0.333238	0.188377	0.220034	0.126006
ATP13A2	0.0259031	0.0391108	0.189654	0.0475564	0.0397416	0.0398542
ATP13A3	0.23276	0.255645	0.234015	0.287694	0.327847	0.315565
ATP13A4	0.030826	0.0692508	0.239672	0.235493	0.234239	0.198721
ATP13A4-AS1	0	0	0.0192477	0.0513847	0.0366481	0.0308877
ATP13A5	0.0521799	0.0425025	0.157881	0.131685	0.252561	0.469736
ATP13A5-AS1	0	0.0113957	0.00508214	0.0398956	0.0388964	0.0536375
ATP1A1	3.30863	3.64115	3.56154	6.36172	8.22362	9.1468
ATP1A1-AS1	1.81868	1.96325	1.83158	2.61816	3.82431	4.05745
ATP1A2	0.22709	0.390798	0.557293	0.167626	0.399023	0.117711
ATP1A3	0.0312924	0.046568	0.169281	0.0269907	0.00761543	0.0142121
ATP1A4	0.0351819	0.0155243	0.10963	0.035315	0.0251232	0.100895
ATP1B1	1.73494	2.33852	3.29209	11.6169	14.0547	25.4862
ATP1B2	0.398579	0.516378	0.546443	0.297138	0.35295	0.17416
ATP1B3	1.51908	1.52358	1.50088	1.87794	1.65249	2.10319
ATP1B4	0.00589341	0.00272637	0.112515	0	0.000301854	0.00226521
ATP2A1	0.0378702	0.0207655	0.264662	0.012429	0.0164438	0.0805355
ATP2A2	0.706919	0.87901	0.657187	0.576506	0.838948	0.768161
ATP2A3	0.0732888	0.373536	0.342471	0.220358	0.945004	0.873003
ATP2B1	1.34912	0.792707	1.33113	0.649143	0.631406	0.555176
ATP2B2	0.0126994	0.00880524	0.100082	0.0829622	0.0106626	0.0111284
ATP2B2-IT2	0	0	0	0	0	0
ATP2B3	0.00893848	0.00602763	0.0840258	0.00876672	0.000772428	0.0124549
ATP2B4	1.7234	1.50564	1.32779	1.4627	1.34592	1.47665
ATP2C1	0.514427	0.849925	0.64336	0.700193	0.817667	0.724319
ATP2C2	0.0279651	0.0819103	0.420781	0.29067	0.114471	0.167931
ATP4A	0	0.0120007	0.00960715	0.0130576	0.00865948	0.0124668
ATP4B	0.0283042	0.0161405	0.107804	0.00925955	0	0.00645298
ATP5A1	6.60205	9.75688	14.9639	18.1977	16.6475	20.1522
ATP5B	3.4362	7.37337	9.35845	6.09364	11.2292	11.5771
ATP5C1	9.20238	6.93828	7.85692	9.78726	7.64423	14.2231
ATP5D	0.287497	0.375965	0.879541	0.415252	0.469189	0.641464
ATP5E	30.4326	23.1648	31.6169	24.6219	24.7276	31.7592
ATP5EP2	19.1446	14.2932	18.5882	16.4554	15.3536	18.2974
ATP5F1	5.30289	4.72515	5.04793	7.54946	5.0849	7.44035
ATP5G1	6.31513	6.08472	6.66504	7.24916	6.44423	0
ATP5G2	18.8878	19.5289	22.1782	22.8881	20.7026	22.8701
ATP5G3	5.95587	5.80977	7.92921	10.9484	9.06238	14.2156
ATP5H	3.59486	3.36147	3.60538	3.77302	3.43238	0
ATP5I	27.1194	21.0388	31.4301	26.2322	27.5928	39.7682
ATP5J	13.7312	13.3658	15.6081	16.8048	16.301	22.1826
ATP5J2	5.68273	3.83061	5.41174	4.67594	3.60686	5.97738
ATP5J2-PTCD1	5.47288	3.70534	5.20086	4.27719	3.47454	5.7676
ATP5L	14.522	12.8278	15.5251	14.2144	14.4229	22.1606
ATP5L2	1.08797	1.06214	1.25487	1.25168	1.12928	1.44715
ATP5O	12.476	12.8322	13.8151	12.6496	13.8659	21.2035
ATP5S	1.09485	1.27883	1.68587	1.26627	1.33037	1.81086
ATP5SL	0.111502	0.435481	0.918782	0.327796	0.608861	0.651622
ATP6AP1	1.03067	1.11217	1.52277	0.686162	1.11217	1.1426
ATP6AP1L	0.126943	0.148882	0.110236	0.171827	0.207476	0.148667
ATP6AP2	1.08012	1.286	1.37721	0.871528	0.937201	1.30616
ATP6V0A1	0.821748	1.29063	1.03308	1.08968	1.07642	0
ATP6V0A2	0.359153	0.163613	0.320068	0.395182	0.358304	0.307875
ATP6V0A4	0.0508261	0.0233844	0.440807	0.780199	1.03157	1.35586
ATP6V0B	1.11294	1.25176	2.28511	1.29929	1.29002	2.58501
ATP6V0C	0.293214	0.372083	0.657129	0.411282	0.491019	0.617781
ATP6V0CP3	0.00689347	0.00138425	0.00935199	0	0.00240857	0.00445421
ATP6V0D1	3.06977	2.97062	3.62589	3.97067	3.28416	5.01231
ATP6V0D2	0.0748593	0.0461334	0.200123	0.0830524	0	0.00821305
ATP6V0E1	14.0026	11.8716	13.1783	11.8852	11.6664	14.9139
ATP6V0E2	0.0368742	0.0607974	0.09032	0.0786734	0.10593	0.16247
ATP6V0E2-AS1	0	0.00277042	0	0	0.0131752	0.0127745
ATP6V1A	1.06911	0.841157	0.83889	1.70645	1.27159	1.77918
ATP6V1B1	0.0150779	0.060227	0.134782	0.0940205	0.0980351	0.106051
ATP6V1B1-AS1	0.00376053	0.0321283	0.0864306	0.0403001	0	0.0174047
ATP6V1B2	0.557295	0.765857	0.652118	0.655122	0.794947	0.82485
ATP6V1C1	1.07698	0.865531	0.615368	0.87783	0.840764	0.605621
ATP6V1C2	1.65195	1.17535	1.45376	2.26023	1.28001	1.7666
ATP6V1D	1.67033	1.24469	1.29249	2.13287	2.23795	2.64671
ATP6V1E1	2.68475	2.24625	2.36849	3.4026	2.41681	2.93801
ATP6V1E2	0.0402859	0.0325026	0.151448	0.0684679	0.0947557	0.0772841
ATP6V1F	7.71595	8.77393	9.81731	8.34249	8.64111	10.6855
ATP6V1G1	12.2552	9.41176	12.5196	12.5014	11.9209	16.3621
ATP6V1G2	0.00533261	0.00281009	0.00571198	0.0147202	0.0103542	0.0050264
ATP6V1G2-DDX39B	0.422654	0.646225	0.444988	0.523222	0.468807	0.412485
ATP6V1G3	0.0110777	0	0.13434	0	0.0234866	0.0242943
ATP6V1H	0.441493	0.36427	0.534093	0.598098	0.740837	0.787527
ATP7A	0.183783	0.278987	0.246946	0.488692	0.274964	0.371397
ATP7B	0.038982	0.0762247	0.0824231	0.0444077	0.048181	0.0200969
ATP8A1	0.160606	0.0790476	0.141446	0.0935309	0.0928208	0.141225
ATP8A2	0.0157138	0.114923	0.153424	0.0511525	0.0400481	0.0498224
ATP8B1	0.299136	0.294725	0.237819	0.268666	0.230325	0.225014
ATP8B2	0.398226	0.343045	0.36061	0.289102	0.280526	0.159851
ATP8B3	0.0365141	0.0348054	0.161628	0.0367564	0.0562804	0.0218512
ATP8B4	0.102274	0.119402	0.0872818	0.104856	0.099714	0.128669
ATP8B5P	0.237183	0.244255	0.210244	0.298326	0.302856	0.451686
ATP9A	0.287107	0.301294	0.327601	0.207326	0.29315	0.342496
ATP9B	0.139374	0.151399	0.313012	0.125191	0.0935616	0.196753
ATPAF1	0.223289	0.332319	0.248228	0.286688	0.244214	0.314802
ATPAF2	0.185875	0.13928	0.556075	0.24503	0.242035	0
ATPIF1	0.679685	2.80057	6.34873	0.96909	4.74821	2.5706
ATR	0.246901	0.352821	0.313911	0.43226	0.254945	0.375313
ATRAID	10.1712	13.0502	12.8246	8.64933	10.2631	13.0449
ATRIP	0.115225	0.307591	0.17794	0.17028	0.201646	0.110158
ATRN	0.642201	0.617271	0.767993	0.628431	0.563243	0.663483
ATRNL1	0.0115877	0.0233937	0.14812	0.0337735	0.0292774	0.0471106
ATRX	4.50841	3.24709	2.45735	3.52325	3.60776	2.54615
ATXN1	0.753242	0.529012	0.378884	0.452076	0.766751	0.428095
ATXN10	0.479728	0.534881	0.731721	0.511989	0.578385	0.97303
ATXN1L	0.291552	0.219432	0.150011	0.249702	0.263629	0.189567
ATXN2	0.70701	0.740417	0.714656	0.47074	0.669127	0.728559
ATXN2L	0.244096	0.37935	0.358515	0.297852	0.410126	0.307998
ATXN3	1.05943	1.13667	1.25872	1.1177	0.980083	1.07034
ATXN3L	0.0500302	0.0501059	0.0464027	0.0371676	0.0378792	0.0366789
ATXN7	0.570436	0.363096	0.348316	0.436998	0.342688	0.36773
ATXN7L1	0.343746	0.501637	0.449511	0.220751	0.275629	0.275384
ATXN7L2	0.015715	0.0523806	0.0493489	0.0446825	0.0574333	0.04269
ATXN7L3	0.0666604	0.171118	0.0870164	0.0744297	0.129489	0
ATXN7L3B	0.46405	1.04731	1.11258	0.719402	1.2531	0.908466
ATXN8OS	0	0	0.0873531	0.00631363	0	0
AUH	0.0452338	0.175172	0.22064	0.136215	0.151307	0.20646
AUNIP	2.12513	2.09983	1.57297	2.67053	2.43289	2.14938
AUP1	0.936987	1.58246	2.08831	1.01468	1.71842	2.07191
AURKA	0.0906894	0.266432	0.293139	0.161513	0.120404	0.126387
AURKAIP1	0.246156	0.39429	0.496468	0.381543	0.554901	0.408269
AURKAPS1	0.0476373	0.0817608	0.0430608	0.126545	0.0741364	0.0916438
AURKB	0.0624369	0.127478	0.341733	0.104856	0.146406	0.09342
AURKC	0.0489784	0.0212794	0.155207	0.093664	0.0554839	0.0635892
AUTS2	0.149935	0.128563	0.199652	0.212706	0.300596	0.342401
AVEN	0.112304	0.122438	0.175909	0.182374	0.206597	0.0928711
AVIL	0.246802	0.256715	0.313111	0.332381	0.238175	0.0987989
AVL9	0.144302	0.133535	0.191005	0.079711	0.154444	0.137341
AVP	0	0	0.00818795	0	0	0
AVPI1	0.162426	0.756811	0.62174	0.50662	0.926784	0.949947
AVPR1A	0.196118	0.241859	0.163594	0.145367	0.21513	0.148153
AVPR1B	0	0	0.00157695	0.00367724	0	0.00258873
AVPR2	0.0135327	0.0533156	0.011413	0	0.0187735	0.0328601
AWAT1	0.0419167	0.0366939	0.999061	0.915107	0.0742894	0.694731
AWAT2	0.0826906	0.199611	5.03633	12.2501	0.701414	8.13382
AXDND1	0.0285519	0.0519254	0.238821	0.170314	0.0469095	0.110673
AXIN1	0.0889394	0.129273	0.204031	0.0550789	0.0598555	0.157177
AXIN2	0.509013	0.912036	0.397243	0.178008	0.338199	0
AXL	18.5385	13.1157	13.3823	14.8602	8.29587	14.5529
AZGP1	0.0420565	0.295417	1.49762	8.09073	12.1592	7.34446
AZGP1P1	0	0	0.0406957	0.035315	0.00993648	0.0142121
AZI2	0.986399	1.2891	0.984644	1.37881	1.08191	1.37652
AZIN1	6.66823	6.44236	3.64774	4.69131	6.13115	5.90368
AZIN2	0.0464347	0.16112	0.21453	0.113599	0.182393	0.0679569
AZU1	0.0342113	0	0.0174665	0.0680553	0	0
B2M	645.521	427.406	324.76	313.808	244.515	234.356
B3GALNT1	0.167819	0.250554	0.145746	0.130236	0.175263	0.151692
B3GALNT2	0.40098	0.691921	0.473667	0.557214	0.669034	0.525475
B3GALT1	0.0007001	0	0.00437036	0.00466773	0.0230034	0.00139621
B3GALT2	0.0987289	0.0442136	0.024303	0.0367843	0.0240676	0.0506143
B3GALT4	0.00523167	0.00116164	0.00919688	0.0107722	0.00594477	0.00238555
B3GALT5	0.009141	0	0.0147676	0.0248526	0.0160022	0.00499646
B3GALT6	0.0248203	0.0581676	0.0451701	0.0320751	0.0268297	0.0293507
B3GALTL	0.20359	0.137973	0.236952	0.152174	0.131239	0.212562
B3GAT1	0.00243908	0.0118112	0.00230332	0.0178323	0.0065658	0
B3GAT2	0.484615	0.450142	0.553288	0.498744	0.484159	0.612381
B3GAT3	0.104229	0.27317	0.481689	0.148827	0.257234	0.280323
B3GNT1	0.168165	0.249111	0.140755	0.0619682	0.155923	0.168452
B3GNT2	0.182688	0.331678	0.187692	0.195235	0.481322	0.317179
B3GNT3	0.0200914	0.0284509	0.0287677	0.0506789	0.0171066	0.0155512
B3GNT4	0	0	0.0284275	0	0.0329544	0.000697529
B3GNT5	0.309241	0.349449	0.242407	0.709697	0.383244	0.402802
B3GNT6	0	0	0.0867713	0.0133849	0	0
B3GNT7	0.309467	0.397124	0.217492	0.192475	0.203289	0.153139
B3GNT8	0.00177571	0	0.0216317	0	0	0.0019576
B3GNT9	0.184391	0.123402	0.124269	0.10664	0.112041	0.118519
B3GNTL1	0.0599252	0.164944	0.066454	0.0572676	0.111984	0
B4GALNT1	0.00791345	0.0466755	0.0211929	0.0429485	0.0177303	0.0130637
B4GALNT2	0.0172534	0.029997	0.0754503	0.16105	0.016978	0
B4GALNT3	0	0.0270954	0.248203	0.197281	0.082828	0.0713568
B4GALNT4	0.000724901	0.00579322	0	0.03027	0.0137124	0
B4GALT1	3.22639	2.81081	2.78131	3.6878	3.22557	3.79863
B4GALT1-AS1	0.054372	0.0608945	0.0516865	0.0579448	0.0791261	0.108112
B4GALT2	0.238677	0.16052	0.436053	0.273157	0.311223	0.390395
B4GALT3	1.07827	1.20854	1.52001	2.29534	1.98117	1.43475
B4GALT4	0.807155	0.566695	0.354374	1.00474	0.551313	0.974965
B4GALT4-AS1	0.27296	0.116589	0.183572	0.337589	0.186635	0.427499
B4GALT5	0.630841	0.391101	0.464038	0.489454	0.427969	0.483561
B4GALT6	0.034567	0.043621	0.0818369	0.0492693	0.0290303	0.0394634
B4GALT7	0.0799356	0.127894	0.354046	0.0946407	0.169323	0.134804
B9D1	0.159739	0.508755	0.369599	0.359727	0.293454	0
B9D2	0.0947258	0.0761504	0.149556	0.0491887	0.121458	0.0495451
BAALC	0.0421623	0.0823291	0.0483515	0.0169509	0.0565329	0.0435726
BAALC-AS1	0.0280965	0.01963	0.0135239	0.00522671	0.0191764	0.0284243
BAALCOS	0	0.0086843	0.0190491	0.0705804	0	0
BAAT	0.00792477	0.0101331	0.0965306	0.0298227	0.0175401	0.0109366
BABAM1	0.657001	0.835177	1.05719	0.640784	1.07431	0.802972
BACE1	1.04082	1.69761	1.32279	1.40834	2.0714	1.48048
BACE1-AS	0.060558	0.0968802	0.154994	0.0968754	0.112868	0.0263889
BACE2	0.893435	0.820274	0.864448	0.431751	0.545328	0.551621
BACH1	0.808362	0.636809	0.582615	0.683083	0.682596	0.695138
BACH1-IT2	0.0181384	0.00501058	0.214719	0.0228971	0	0.00163469
BACH2	0.0409804	0.0778969	0.0518891	0.0700425	0.11168	0.0946205
BAD	0.0118258	0.0457227	0.0750942	0.0214743	0.0331394	0.0316847
BAG1	0.261257	0.383737	0.527872	0.437587	0.57272	0.475975
BAG2	0.707704	0.568081	0.661822	1.13031	0.462989	0.901308
BAG3	0.81873	1.71983	1.04604	0.801317	2.10546	1.43896
BAG4	0.760246	1.34743	0.810162	0.70965	1.25816	1.16358
BAG5	1.05533	0.713568	0.757853	1.57385	0.985801	1.11753
BAG6	0.095923	0.18784	0.269601	0.0916508	0.19668	0.20654
BAGE	0.0150779	0.0153009	0.499636	0.0740299	0.0125286	0.0142121
BAGE2	0.0312955	0.0170845	0.113914	0.0786463	0.0384456	0.0359044
BAGE3	0.0312955	0.0170845	0.113914	0.0786463	0.0384456	0.0359044
BAGE4	0.0312955	0.0170736	0.113914	0.0787205	0.0384456	0.0359044
BAGE5	0.0312955	0.0170736	0.113914	0.0787205	0.0384456	0.0359044
BAHCC1	0.0428907	0.0554452	0.118657	0.107572	0.0458035	0
BAHD1	0.0472447	0.0797681	0.0577263	0.0555564	0.100653	0.0584599
BAI1	0.0150779	0.0153009	0.0285766	0.0100232	0.00152633	0.00644504
BAI2	0.0240529	0.0143564	0.0189517	0.00420417	0.00682697	0.00192899
BAI3	0.108339	0.171456	0.192388	0.0918386	0.114726	0.068531
BAIAP2	0.0517139	0.168877	0.162597	0.0721484	0.150807	0
BAIAP2-AS1	0.0691974	0.0819671	0.0495904	0.0786374	0.0473949	0
BAIAP2L1	0.278725	0.151538	0.255165	0.234301	0.208107	0.24065
BAIAP2L2	0.00601668	0.0208353	0.0293593	0.00225415	0.00213527	0.0177894
BAIAP3	0.0674749	0.0699697	0.177621	0.0765862	0.0845063	0.10851
BAK1	0.18471	0.207214	0.338474	0.313034	0.272649	0.28082
BAMBI	0.0610365	0.154464	0.0653507	0.184071	0.545852	0.360858
BANCR	0.0272532	0.0247106	0.0409069	0.0462577	0.0223221	0.0251563
BANF1	6.07459	5.73361	7.28695	5.88057	6.23254	6.85582
BANF2	0	0	0.112252	0	0	0
BANK1	0.0895893	0.0306018	0.0936712	0.0491982	0.0327074	0.128277
BANP	0.0933084	0.0896196	0.288093	0.0832425	0.160346	0.0716846
BAP1	0.209347	0.341595	0.454263	0.216522	0.367959	0.331079
BARD1	0.151152	0.277537	0.293446	0.220639	0.269825	0.280963
BARHL1	0	0	0.00503767	0	0.000170956	0
BARHL2	0	0	0.012343	0	0	0
BARX1	0	0	0	0	0	0
BARX2	0.0201654	0.026469	0.157183	0.552269	0.744609	0.537689
BASP1	0.709556	0.420934	0.571927	0.294329	0.333324	0.306533
BASP1P1	0.00126958	0	0.0695658	0.0026276	0.00376293	0.00156679
BATF	0.316291	0.260868	0.398232	0.305777	0.198609	0.0780037
BATF2	0.0113004	0.0537088	0.0221355	0.0176575	0.015426	0.00302807
BATF3	0.196875	0.302703	0.215559	0.180894	0.132897	0.0439491
BAX	0.269924	0.211792	0.412592	0.337137	0.236854	0.189495
BAZ1A	0.995144	1.22999	0.986246	0.913616	1.11204	0.765035
BAZ1B	1.01476	1.35767	0.810843	0.788123	1.15723	0.926094
BAZ2A	0.865582	1.20142	0.853594	0.73394	1.18903	0.960431
BAZ2B	2.26356	2.0232	1.45041	2.19633	1.88416	2.17098
BBC3	0.0178956	0.0543134	0.0710276	0.0172459	0.148299	0.064013
BBIP1	1.85352	1.46734	1.65256	2.8724	2.30073	3.46379
BBOX1	0.048103	0.212655	0.696359	2.18615	0.678739	1.10064
BBOX1-AS1	0.0327678	0.0123481	0.154065	0.0434646	0.0412349	0.171152
BBS1	0.296959	0.272564	0.400489	0.276956	0.445761	0.32447
BBS10	0.142838	0.283911	0.232497	0.159806	0.274827	0.284395
BBS12	0.299417	0.132023	0.0825362	0.124967	0.165679	0.122085
BBS2	0.359138	0.585542	0.542361	0.534702	0.504003	0.644411
BBS4	1.01426	0.914419	0.737624	0.717039	1.0026	1.10534
BBS5	0.160517	0.283002	0.207057	0.116962	0.141039	0.15524
BBS7	0.289389	0.598127	0.626581	0.387823	0.327534	0.388573
BBS9	0.522892	0.623253	0.438292	0.388284	0.33123	0.389863
BBX	3.25199	3.39949	2.11794	2.07163	3.1482	2.16656
BCAM	0.125064	0.12912	0.188923	0.102961	0.105404	0.0977155
BCAN	0.011808	0.01561	0.0563569	0.0401541	0.0280515	0
BCAP29	1.19256	0.990303	1.09667	1.91763	0.90727	1.61301
BCAP31	13.9732	12.5361	17.4174	16.7268	12.944	17.8265
BCAR1	0.0267884	0.0299922	0.0554563	0.0214692	0.05117	0.030283
BCAR3	0.397336	0.181619	0.224513	0.341284	0.321685	0.295541
BCAR4	0.0312811	0.0183898	0.0472769	0.00886479	0.0543218	0
BCAS1	0.0656413	0.161123	0.190144	0.16819	0.517754	0.158099
BCAS2	5.76814	6.24885	4.51248	4.334	5.80143	4.2944
BCAS3	0.343748	0.456232	0.481082	0.335298	0.38762	0
BCAS4	0.0264736	0.0632543	0.148957	0.0176575	0.0219947	0.0290165
BCAT1	0.147802	0.0846202	0.174292	0.0657213	0.048949	0.0952598
BCAT2	0.0833964	0.502278	1.08747	0.4874	0.470052	0.490654
BCCIP	4.43869	2.4628	3.9426	3.50689	3.6275	3.58978
BCDIN3D	0.164218	0.175961	0.109614	0.100242	0.280033	0.330484
BCDIN3D-AS1	0.165513	0.165865	0.112105	0.140292	0.260526	0.222332
BCHE	0.765635	1.04339	0.793093	0.969909	0.822012	0.873238
BCKDHA	0.370737	0.736249	1.05966	1.06051	1.01255	0.791829
BCKDHB	0.255153	0.244463	0.305229	0.311955	0.276518	0.419834
BCKDK	0.0428295	0.187579	0.340776	0.0814944	0.258526	0.152758
BCL10	1.18667	1.95481	1.07753	0.908114	1.61337	1.22653
BCL11A	0.0499642	0.0491642	0.10194	0.246655	0.0746136	0.191778
BCL11B	0.0690359	0.179726	0.094125	0.153981	0.209426	0.152149
BCL2	0.137304	0.189229	0.0836472	0.0804498	0.152885	0.0886487
BCL2A1	1.4816	2.04254	0.779246	1.39989	1.56593	0.462957
BCL2L1	0.157879	0.663575	0.581988	0.859805	0.856845	0.559002
BCL2L10	0.0222929	0.0497608	0	0.0298363	0.020175	0.012909
BCL2L11	0.237387	0.278354	0.262567	0.192759	0.231429	0.12062
BCL2L12	0.190624	0.12604	0.300849	0.103853	0.133639	0.0921518
BCL2L13	0.564673	0.559409	0.751593	1.02634	0.524375	0.877995
BCL2L14	0.0182394	0.00979946	0.0426413	0.00440291	0.0371302	0
BCL2L15	0.0367619	0.0469908	0.0570848	0.0678721	0.0165931	0.0207358
BCL2L2	0.229918	0.371463	0.32297	0.177476	0.507753	0.4556
BCL2L2-PABPN1	3.24853	2.56878	2.99603	2.65153	2.9944	2.61514
BCL3	0.456444	0.68559	0.551294	0.321833	0.648909	0.462459
BCL6	1.21611	1.64395	0.493117	1.40076	1.76162	1.01726
BCL6B	0.1638	0.354917	0.226491	0.117416	0.318168	0.148384
BCL7A	0.0172276	0.0409026	0.276123	0.0338833	0.0862578	0.139245
BCL7B	0.710988	0.650878	0.674264	0.671729	0.646889	0.435579
BCL7C	0.207553	0.323973	0.444345	0.229496	0.347159	0.241461
BCL9	0.117066	0.207208	0.152992	0.0829879	0.15313	0.1536
BCL9L	0.0372806	0.124752	0.122538	0.160935	0.171706	0.0527964
BCLAF1	6.63571	4.1671	3.2872	5.28205	3.71606	3.61428
BCO1	0.0633594	0.0619633	0.244008	0.0541367	0.0586125	0.0505993
BCO2	0.133346	0.147909	0.173288	0.264795	0.0905116	0.10267
BCOR	0.35844	0.642363	0.543593	0.47915	0.625431	0.46387
BCORL1	0.0598147	0.1783	0.215102	0.0857428	0.226869	0.12054
BCORP1	0	0	0	0	0.000751367	0
BCR	0.350215	0.344224	0.276718	0.353862	0.330817	0.286597
BCRP2	0.00815326	0.0171065	0.0816519	0.0150421	0.0245503	0.0142121
BCRP3	0.0924781	0.0828516	0.301121	0.112274	0.0727798	0.0742908
BCS1L	1.86622	1.42415	1.54731	1.856	1.65186	1.483
BCYRN1	0.0287852	0.0086962	0.20247	0.0863457	0.0482216	0.0149279
BDH1	0.0725318	0.0393023	0.198469	0.421189	0.122375	0.513867
BDH2	0.9751	0.733184	0.496798	0.395469	0.781638	0.522505
BDKRB1	0.061072	0.113407	0.162443	0.0579963	0.0923813	0.0539045
BDKRB2	0.860906	0.469618	0.57348	0.622684	0.374215	0.682708
BDNF	0.0162378	0.0524416	0.100722	0.080161	0.0516015	0.0467719
BDNF-AS	0.306371	0.280103	0.261182	0.306859	0.36333	0.369516
BDP1	0.981514	0.953944	0.840678	0.66219	1.17272	0.823993
BEAN1	0.0301559	0.000677931	0.137186	0.0332404	0.0177743	0.0284243
BEAN1-AS1	0.0266312	0.0154996	0.1074	0.0192627	0.0183861	0
BECN1	2.3227	1.88955	2.16001	2.21001	1.7887	0
BECN1P1	0	0	0	0.00350347	0	0
BEGAIN	0.00396934	0.0148759	0.427849	0.0966958	0.0187929	0.0116667
BEND2	0.0318861	0.0391302	0.0728694	0.041063	0	0.0229491
BEND3	0.0306184	0.00423493	0.0402289	0.0318989	0.0194834	0.0162959
BEND3P3	0.0104985	0.00644086	0.0170862	0.00721213	0.0277407	0.00729093
BEND4	0.00265925	0.00368796	0.052279	0.0166031	0.0132136	0.0142623
BEND5	0.131333	0.325395	0.33089	0.104805	0.227271	0.147169
BEND6	0.0847076	0.0636105	0.0884049	0.0641012	0.0732713	0.0736974
BEND7	0.0994077	0.107279	0.231674	0.167962	0.12368	0.109169
BEST1	0.238441	0.261943	0.323184	0.193139	0.282729	0.318155
BEST2	0	0.00819082	0.11421	0.0506778	0	0.0143944
BEST3	0.00734058	0.0322618	0.179684	0.0705348	0.0265028	0.0627399
BEST4	0.221725	0.338553	0.379759	0.398289	0.215624	0.240858
BET1	2.29118	2.35998	2.60745	2.96755	2.24504	3.14465
BET1L	0.545625	0.476762	0.414872	0.299205	0.289359	0.452868
BEX1	0.00704599	0.00244034	0.0369307	0	0.0175041	0.0100868
BEX2	0.0592629	0.304422	0.500235	0.717675	1.07397	1.08086
BEX4	0.657993	1.61586	1.74222	1.28668	1.86651	1.86421
BEX5	0.338016	0.36732	0.259975	0.216408	0.43364	0.391927
BFAR	1.39648	1.349	1.05456	1.23519	1.03354	1.07168
BFSP1	0.101238	0.178679	0.19099	0.0411672	0.184579	0.077612
BFSP2	0.0200215	0.0449621	0.190753	0.0229506	0.0405126	0.0140374
BGLAP	0.0482494	0.084308	0.0624545	0.0268898	0.145582	0.144558
BGLT3	0.00783506	0.000277358	0.0752915	0.013245	0.00764586	0.00515244
BGN	2.12572	1.7689	4.43133	1.13965	2.05171	2.48627
BHLHA15	0	0	0.00603985	0	0	0
BHLHA9	0.000745379	0	0	0	0	0
BHLHB9	0.328923	0.177802	0.0889358	0.147426	0.245584	0.0929053
BHLHE22	0.0258327	0.0215213	0.016676	0.0150726	0.0505755	0.0139235
BHLHE23	0	0	0	0	0	0
BHLHE40	2.83374	2.7798	2.24677	2.81719	4.13429	4.48863
BHLHE40-AS1	0.0476938	0.0379187	0.0311136	0.0213082	0.0477532	0.0371195
BHLHE41	0.22634	0.293752	0.425278	0.229297	0.416567	0.58455
BHMT	0.0305509	0.0710925	0.132177	0.0666602	0.0160301	0.035127
BHMT2	0.536544	0.381101	0.477819	0.371237	0.309335	0.315541
BICC1	8.01028	6.83435	2.84427	4.58988	4.55855	2.48599
BICD1	0.155541	0.194148	0.206908	0.167722	0.145697	0.0604699
BICD2	0.402802	0.394522	0.503333	0.57469	0.520782	0.620629
BID	0.237145	0.485899	0.264929	0.309851	0.309117	0.35777
BIK	0.0203251	0.0286892	0.0103373	0.045405	0.0988257	0.0889112
BIN1	0.0553022	0.156976	0.328963	0.0495417	0.0656447	0.131769
BIN2	0.180935	0.216612	0.29696	0.139297	0.177672	0.110588
BIN3	1.07064	0.85545	0.712481	1.19535	0.820763	0.738331
BIN3-IT1	0.0780462	0.0519266	0.197893	0.108916	0.0753556	0.0949949
BIRC2	0.842638	1.12245	1.21644	0.751111	1.11267	1.14196
BIRC3	8.82814	17.5139	5.82616	3.71403	10.3422	5.28028
BIRC5	0.11513	0.142346	0.192854	0.304931	0.152958	0
BIRC6	0.590042	0.714468	0.592617	0.666276	0.656108	0.570326
BIRC7	0	0	0.0208182	0	0.0242618	0.0155987
BIRC8	0.00340782	0	0.0407715	0.0103445	0	0
BIVM	0.18335	0.200771	0.183234	0.160909	0.214872	0.16452
BIVM-ERCC5	0.976075	1.36544	0.849926	0.816528	1.17515	0.780727
BLACAT1	0	0	0.0021131	0.017443	0	0
BLACE	0.00347118	0.0200214	0.0640582	0	0	0.00158529
BLCAP	0.503521	0.843686	0.948489	0.715673	0.811263	0.889303
BLID	0.0549418	0.111491	0.021496	0.0272149	0.0456379	0.0180537
BLK	0.0113854	0.0222559	0.0863399	0.0142618	0.0125286	0.0118435
BLM	0.0884651	0.124439	0.100055	0.0834132	0.0242887	0.0308791
BLMH	0.265366	0.542334	0.473828	0.411271	0.460845	0
BLNK	0.412161	0.624714	0.950999	2.06731	1.01253	1.43525
BLOC1S1	5.85421	5.63373	6.80959	6.12763	5.51589	7.49653
BLOC1S1-RDH5	5.85421	5.63373	6.80959	6.12763	5.51589	7.49653
BLOC1S2	0.407523	1.42043	2.61017	1.08235	2.3947	3.81754
BLOC1S3	0.544732	0.789565	0.690651	0.801577	0.647614	0.777291
BLOC1S4	0.0451851	0.0581158	0.040403	0.0302602	0.03432	0.0473616
BLOC1S5	0.525524	1.03791	0.793387	0.47423	0.720312	0.391709
BLOC1S5-TXNDC5	1.29848	1.35289	1.33703	0.980398	1.05962	1.14677
BLOC1S6	0.915826	0.836378	0.678574	0.771885	0.659609	0.520433
BLVRA	4.84991	3.52202	4.86785	3.25831	3.97982	4.23569
BLVRB	0.866724	4.76191	4.87375	1.85468	5.17237	5.39962
BLZF1	1.11861	1.19952	0.871858	1.07699	1.10232	1.05251
BMF	0.0403602	0.113923	0.0402451	0.0182093	0.0413181	0.0268424
BMI1	0.421141	0.424945	0.298226	0.25354	0.461442	0.331125
BMP1	0.215138	0.213629	0.232096	0.259295	0.156544	0.289848
BMP10	0	0	0.00442959	0	0.0149287	0
BMP15	0	0	0.0274199	0	0	0
BMP2	0.246632	0.193781	0.187213	0.226748	0.195822	0.270516
BMP2K	0.372629	0.337613	0.3185	0.255904	0.325405	0.244603
BMP3	0.182142	0.213858	0.16699	0.25475	0.242831	0.44946
BMP4	0.715509	1.92717	1.04032	0.951928	0.963442	0.722957
BMP5	0.00638436	0.0260065	0.107564	0.107357	0.0790767	0.037643
BMP6	0.369415	0.308082	0.294461	0.287082	0.2413	0.289511
BMP7	0.0298231	0.127739	0.157388	0.108808	0.180254	0.177211
BMP8A	0.714129	0.674005	0.412846	0.626778	0.39747	0.315154
BMP8B	0.924278	0.927044	0.844104	0.534265	0.823286	0.757863
BMPER	0.0224416	0.0153009	0.167366	0.112281	0.0212695	0.117758
BMPR1A	0.208529	0.322058	0.209095	0.197343	0.271977	0.280198
BMPR1B	0.087386	0.116045	0.120162	0.0760064	0.131054	0.0432445
BMPR1B-AS1	0.0170907	0.00358335	0.0654251	0.0304472	0.01291	0.0284909
BMPR2	0.525265	0.488697	0.427746	0.399447	0.453154	0.531202
BMS1	1.44748	1.48215	1.0024	1.56842	0.900176	1.26137
BMS1P17	0.0116511	0.0194916	0.0314398	0.00388918	0.012451	0.00286003
BMS1P18	0.0116511	0.0194916	0.0314398	0.00388918	0.012451	0.00286003
BMS1P20	1.15135	0.801498	1.13665	1.03004	0.695008	1.18285
BMS1P4	0.285045	0.183368	0.159905	0.21165	0.100295	0.0843846
BMS1P5	0.460443	0.359763	0.473577	0.311781	0.161776	0.31018
BMS1P6	0.494368	0.515258	0.509758	0.556022	0.315564	0.390123
BMX	0.511896	0.256585	0.20277	0.34142	0.244517	0.182921
BNC1	0.00161694	0.00806477	0.103512	0.12253	0.0745633	0.105441
BNC2	0.20483	0.15951	0.163601	0.301802	0.411055	0.254991
BNIP1	0.725642	0.646624	0.460111	0.563408	0.622613	0.576503
BNIP2	0.606186	0.531311	0.539215	0.452287	0.459983	0.541937
BNIP3	0.262495	0.330957	0.39454	0.292071	0.318904	0.388008
BNIP3L	7.31157	7.20507	7.33063	8.93352	5.46268	7.08854
BNIPL	0.161912	0.327754	1.24963	2.92668	0.646133	1.27806
BOC	0.851538	1.45642	1.14693	0.718739	1.22654	0.876367
BOD1	0.263536	0.290504	0.32716	0.268818	0.326453	0.362385
BOD1L1	1.48407	1.73084	1.36242	1.1034	1.5762	1.32028
BOD1L2	0.00793766	0.00812361	0.0140219	0.00763759	0.0134345	0.0139871
BOK	0	0.0439091	0.0541978	0.0199664	0.0460675	0.0476284
BOK-AS1	0.00170818	0	0	0	0.0103723	0
BOLA1	0.0320934	0.0526188	0.057802	0.0300568	0.0485683	0.0169425
BOLA2	1.31855	1.33883	1.61705	1.9013	1.57924	2.55369
BOLA2B	1.31855	1.33883	1.61705	1.9013	1.57924	2.55369
BOLA3	0.115481	0.421607	0.523382	0.296892	0.364828	0.312822
BOLA3-AS1	0.353806	0.441829	0.349785	0.113102	0.354297	0.277412
BOLL	0.0150779	0.0188104	0.0497286	0.0237555	0.0139207	0.00167596
BOP1	0.0428131	0.0446277	0.105465	0.0583878	0.0844521	0.0446574
BORA	0.220229	0.245278	0.134863	0.131583	0.258545	0.133701
BPESC1	0.00134805	0.0105677	0.0655496	0.0032611	0.00212824	0.0200889
BPGM	0.530325	0.955059	0.550672	1.1236	0.871988	1.18487
BPHL	0.247694	0.25409	0.317461	0.32052	0.215224	0.396061
BPI	0	0.00982559	0.0829387	0.014662	0.0345283	0
BPIFA1	0	0	0.0399872	0	0	0.0188215
BPIFA2	0.0445271	0	0.264085	0.0489523	0.0226126	0.0235389
BPIFA3	0	0.00381101	0.15919	0.00512002	0	0.0616564
BPIFA4P	0.0223154	0.0398844	0.17323	0.0405469	0.0174207	0.0117487
BPIFB1	0	0.0185335	0.279834	0.0447655	0.00117456	0.0062053
BPIFB2	0.0417733	0.00278198	0.187776	0.0205741	0	0
BPIFB3	0	0	0.109026	0.017153	0	0.0128962
BPIFB4	0.0421296	0.0225487	0.225889	0.0241354	0	0.0568486
BPIFB6	0.0183558	0	0.138767	0.0149384	0.0198824	0.0142121
BPIFC	0.0980066	0.0220132	0.407749	0.786312	0.112538	0.266374
BPNT1	0.401921	0.535223	0.550245	0.677572	0.611497	0.515156
BPTF	2.24229	2.08939	1.643	1.47157	2.10332	0
BPY2	0	0	0	0	0	0
BPY2B	0	0	0	0	0	0
BPY2C	0	0	0	0	0	0
BRAF	0.498011	0.341671	0.249066	0.272136	0.239138	0.193037
BRAP	0.172638	0.180309	0.227927	0.236607	0.240681	0.198494
BRAT1	0.0318768	0.245802	0.216505	0.145198	0.0467852	0.0359776
BRCA1	0.153203	0.158894	0.433489	0.0737094	0.0701096	0
BRCA2	0.106892	0.201307	0.210135	0.17687	0.18513	0.0993709
BRCC3	0.593131	0.849035	0.824858	0.458725	0.700897	0.786959
BRD1	0.0666344	0.116317	0.0816765	0.129506	0.145523	0.108594
BRD2	1.12503	1.75	0.901989	1.28179	1.69448	0.888402
BRD3	0.0875832	0.345881	0.285154	0.191779	0.258585	0.173559
BRD4	1.32679	1.16302	1.57151	1.20554	1.51924	1.05765
BRD7	0.318417	0.226512	0.23803	0.198473	0.244748	0.308903
BRD7P3	0.0387824	0.0135103	0.0774142	0.0238249	0.0138879	0.0191093
BRD8	1.74102	1.94212	1.55892	1.40598	1.59199	1.66398
BRD9	0.35529	0.40663	0.404134	0.227787	0.380065	0.251712
BRDT	0.0150779	0.0141174	0.165203	0.0311603	0.021618	0.0218218
BRE	1.62148	1.63376	1.50349	1.85812	1.49005	1.32013
BRE-AS1	0.126976	0.202287	0.177678	0.143276	0.204589	0.15337
BREA2	0	0	0.016322	0.0326824	0.0237912	0.0369516
BRF1	0.0322762	0.0636294	0.182195	0.250264	0.0357065	0.073075
BRF2	0.217489	0.499906	0.290998	0.2968	0.369885	0.352587
BRI3	0.916067	1.11209	1.46333	0.746478	1.23501	1.15466
BRI3BP	0.0178042	0.0346127	0.171557	0.171922	0.0818135	0.275904
BRICD5	0.0716202	0.0920305	0.144291	0.0536402	0.0740048	0.136618
BRINP1	0.0128606	0.000556397	0.151219	0.024778	0.0247178	0.0112717
BRINP2	0.000869737	0.00784496	0.105558	0.00952805	0.00363834	0.0181274
BRINP3	0.021088	0.0163423	0.0856622	0.0879573	0.0280799	0.0239597
BRIP1	0.0194505	0.0620352	0.26508	0.139433	0.0242575	0
BRIX1	2.9238	2.77457	2.75873	2.20657	2.18525	2.51027
BRK1	14.1587	10.6279	11.1256	10.4878	10.5416	10.8436
BRMS1	0.249183	0.61165	0.834383	0.451979	0.520564	0.668898
BRMS1L	0.206783	0.339142	0.249374	0.272097	0.137815	0.190907
BROX	5.22352	4.00282	3.06465	5.01195	4.13622	4.52192
BRPF1	0.176501	0.258801	0.38251	0.154413	0.228389	0.278892
BRPF3	0.178978	0.367772	0.273446	0.230814	0.313184	0.255344
BRS3	0.0714152	0.0263765	0.0494698	0.0977759	0.0178231	0.0206046
BRSK1	0.00482494	0.0150702	0.136302	0.028817	0	0.0134617
BRSK2	0.00999906	0.00357844	0.0203613	0.0014871	0	0.0128798
BRWD1	0.338048	0.720193	0.431895	0.406617	0.563269	0.471044
BRWD1-AS1	0.00498982	0	0.0233643	0.00232288	0	0
BRWD1-IT2	0.00254039	0	0.0146505	0.0057	0	0
BRWD3	0.374199	0.328055	0.173259	0.255962	0.219752	0.123525
BSCL2	1.13717	2.70581	2.91135	2.21718	3.25837	2.82506
BSDC1	0.807013	0.796851	1.02735	1.17855	0.902859	0.765523
BSG	0.714926	1.47757	3.0564	0.893392	1.81693	2.11518
BSN	0.0286481	0.0395429	0.229114	0.0560683	0.0207165	0.0169225
BSN-AS2	0.00472024	0.00428884	0.0810246	0.0201989	0.00300171	0.00598546
BSND	0	0	0.0886831	0	0	0.00429555
BSPH1	0	0.000527618	0.127986	0.045405	0.0415604	0.000779935
BSPRY	0.0363623	0.080987	0.175121	0.0479603	0.0874912	0.131906
BST1	0.291256	0.328715	0.295905	0.13488	0.175083	0.38586
BST2	6.11133	7.63526	3.85627	2.34499	3.49272	2.03057
BSX	0	0	0.0855319	0	0.0518952	0.0230136
BTAF1	0.318662	0.581722	0.350468	0.468742	0.387678	0.414895
BTBD1	0.391616	0.337999	0.232934	0.263987	0.260124	0.297878
BTBD10	0.543099	0.666481	0.605938	0.83777	0.658604	0.85413
BTBD11	0.0560427	0.0196388	0.165569	0.107919	0.0654259	0.128728
BTBD16	0.0459877	0.0142383	0.177672	0.0983775	0.105544	0.0460955
BTBD17	0	0	0	0	0	0
BTBD18	0.0888021	0.0361254	0.0428497	0.0795467	0.0657024	0.0337317
BTBD19	0.135349	0.448543	0.414458	0.260098	0.161016	0.123991
BTBD2	0.0381518	0.0533971	0.085622	0.0816373	0.0478422	0.0312237
BTBD3	0.345562	0.240027	0.161354	0.294059	0.232121	0.232571
BTBD6	0.378172	0.52362	0.588795	0.307124	0.547959	0.4326
BTBD7	0.357154	0.436036	0.482015	0.347483	0.312239	0.31479
BTBD8	0.202247	0.206378	0.226315	0.103325	0.300506	0.172459
BTBD9	0.104408	0.161843	0.170837	0.0722352	0.107461	0.100804
BTC	0.0401227	0.0448654	0.0582568	0.0209138	0.0841695	0.0511444
BTD	1.29699	1.12043	1.40731	1.5183	0.903526	1.83686
BTF3	23.0007	18.3835	20.4956	21.0636	16.3899	23.8067
BTF3L4	0.604515	0.58689	0.597085	0.764512	0.62365	0.763535
BTF3P11	0	0	0.004038	0	0.0019576	0
BTG1	0.916743	1.60665	0.830293	0.742991	1.30287	0.888658
BTG2	1.88442	3.53116	2.34641	3.0998	3.80839	3.44493
BTG3	0.714293	0.899909	0.864935	0.766168	1.1247	1.16394
BTG4	0.0344747	0.0157622	0.0770102	0.00760553	0	0.0185686
BTK	0.881539	0.392663	0.409539	0.511033	0.433594	0.287796
BTLA	0.112541	0.0959829	0.142893	0.0581376	0.0324153	0.0392526
BTN1A1	0.0152302	0.0306018	0.0746955	0	0.00626431	0.0568486
BTN2A1	0.795968	1.12608	0.66524	0.658459	0.776918	0.556239
BTN2A2	0.603225	0.58482	0.561496	0.650327	0.522097	0.452542
BTN2A3P	0.140537	0.156543	0.192266	0.197968	0.0980615	0.0717288
BTN3A1	0.944669	1.02841	0.695306	0.653675	0.57556	0.355078
BTN3A2	1.95901	1.50709	1.27181	1.17871	1.03333	0.861673
BTN3A3	1.34445	0.840891	0.59478	1.0401	0.61401	0.373967
BTNL10	0	0	0.0490583	0.00170269	0	0
BTNL2	0	0	0	0	0	0
BTNL3	0.0151428	0.00953535	0.11757	0.0589657	0.0132814	0.0284243
BTNL8	0.0535605	0.00616604	0.189581	0.0506006	0.031602	0.0275258
BTNL9	0.181621	0.178289	0.245032	0.164124	0.167238	0.256249
BTRC	0.226772	0.165534	0.284275	0.295556	0.20069	0.236717
BUB1	0.068344	0.0742638	0.183531	0.135479	0.111674	0.0537936
BUB1B	0.0917496	0.0462586	0.118503	0.0920355	0.0775049	0.0333849
BUB3	5.2131	5.29623	4.27341	4.53755	4.94777	4.57077
BUD13	0.255566	0.421265	0.470756	0.297909	0.35035	0.272489
BUD31	2.72577	4.52531	3.82975	4.21505	4.22484	4.3479
BVES	0.0511242	0.038315	0.103214	0.0340141	0.0314985	0.0630539
BVES-AS1	0.0439414	0.036285	0.131924	0.0338736	0.0234185	0.0415536
BYSL	0.183353	0.206406	0.186026	0.167985	0.0902023	0.222754
BZRAP1	0.0920548	0.0354337	0.166825	0.0226577	0.0431678	0
BZRAP1-AS1	1.36927	1.22575	0.999406	1.16208	0.815339	0
BZW1	4.68157	3.83111	3.27304	5.57994	3.98459	4.93073
BZW2	2.27333	1.95807	2.02726	2.60856	1.86083	2.21709
C10orf10	0.550131	0.504468	0.300141	0.527212	0.767686	0.673189
C10orf105	0.00968276	0.0246654	0.0115966	0.00645895	0.00425088	0.00530583
C10orf107	0.0148714	0.0391523	0.059603	0.0413261	0.0575452	0.0330461
C10orf11	0.697543	0.228462	0.396209	0.931843	0.473347	1.19027
C10orf111	0.00187329	0.0144641	0.0240686	0.00910553	0.0134761	0.00367539
C10orf113	0.0979686	0.062009	0.16322	0.13396	0.0491969	0.0999157
C10orf115	0	0	0.0258432	0	0	0.00416674
C10orf12	0.0966846	0.123017	0.0930584	0.141879	0.088406	0.0998978
C10orf120	0	0.0102987	0.069346	0.0301536	0.00962133	0
C10orf126	0.00840424	0.00955438	0.0360484	0.0159777	0.0145199	0.0151533
C10orf128	1.9645	1.21609	0.989288	0.795162	0.753618	0.531162
C10orf131	0.0862656	0.180758	0.0506032	0.015135	0.0440942	0.0284243
C10orf2	0.068594	0.0775272	0.175443	0.0827305	0.0648345	0.0850149
C10orf25	0.445335	0.398165	0.21031	0.216771	0.330801	0.295053
C10orf32	5.04454	2.65429	3.34776	3.41877	2.42394	3.22661
C10orf32-ASMT	5.04454	2.65429	3.34776	3.41877	2.42394	3.22661
C10orf35	0	0.128339	0.199841	0.040206	0.175633	0.126065
C10orf40	0	0.0153009	0.0373291	0.0134533	0	0
C10orf53	0	0	0.0140963	0	0.00683379	0
C10orf54	0.210409	0.399524	0.465578	0.379467	0.296424	0.383362
C10orf55	0.0571246	0.294076	0.249398	0.196755	0.179679	0.232941
C10orf62	0	0	0.0359558	0	0	0.00787275
C10orf67	0.0150779	0.0260495	0.0912728	0.0226199	0.0148977	0.0203353
C10orf71	0.0150779	0.0129241	0.0789342	0	0.0103391	0.000558324
C10orf71-AS1	0.000591292	0	0	0	0	0.0066184
C10orf76	0.345212	0.280948	0.302041	0.211261	0.236179	0.263487
C10orf82	0.047169	0.0345843	0.148564	0.140984	0.136676	0.107921
C10orf85	0.0138648	0.0112136	0.0521142	0.0339372	0.0503333	0.00703093
C10orf88	0.0484054	0.0407966	0.0503348	0.101122	0.0678197	0.0837539
C10orf90	0.0393534	0.0308864	0.0276523	0.0248214	0.0658104	0.0478887
C10orf91	0.000618582	0	0	0	0	0
C10orf95	0.0668965	0.102652	0.108577	0.126827	0.116802	0.169852
C10orf99	0	0	0.155634	0.0433591	0.0019489	0.0120014
C11orf1	0.519373	0.975085	1.25066	1.56159	0.947998	1.4038
C11orf16	0.00789186	0.0452516	0.137354	0.07838	0.0328943	0.035863
C11orf21	0.0285336	0.0452249	0.0103373	0.0935127	0	0.00298066
C11orf24	0.398471	0.152383	0.398488	0.149337	0.152732	0.227976
C11orf30	0.505111	0.500671	0.294265	0.409856	0.51705	0.248528
C11orf31	0.350361	0.567652	0.721638	0.500148	0.841617	0.613075
C11orf40	0.0236003	0.0229144	0.0574294	0.0246401	0.00135201	0.00757414
C11orf42	0	0.0124957	0.0561859	0.0118242	0	0.0306745
C11orf44	0	0	0.00227246	0.00110427	0	0.00743813
C11orf45	0.0375389	0.0410842	0.0251303	0.0181453	0.0608434	0.0288169
C11orf48	1.18669	1.39128	2.0104	0.995883	1.26669	1.36891
C11orf49	0.292031	0.46588	0.617227	0.353983	0.429472	0.543811
C11orf52	0.0975272	0.22131	0.492031	0.621912	0.485388	1.07126
C11orf53	0	0	0.0258432	0.00409054	0.0177927	0.0044189
C11orf54	1.02253	1.23511	0.924027	1.04049	1.2913	1.32919
C11orf57	0.478911	0.581889	0.625099	0.520644	0.488031	0.559762
C11orf58	18.3309	16.1995	18.1205	12.8151	16.1609	16.9093
C11orf63	0.385689	0.381693	0.281102	0.196396	0.300687	0.119183
C11orf65	0.065955	0.0612037	0.112693	0.0878326	0.0935616	0.062707
C11orf68	0.26816	0.542202	0.454152	0.207826	0.43238	0.359211
C11orf70	0.66828	0.489629	0.453612	0.256557	0.350013	0.328668
C11orf71	0.0471027	0.12026	0.191065	0.0653049	0.232515	0.161823
C11orf73	3.82153	3.54564	3.43088	3.23273	3.14089	3.89466
C11orf74	1.13281	1.19699	1.09834	0.565898	1.07508	0.944966
C11orf80	0.0582742	0.0871749	0.234284	0.189256	0.0935538	0.115244
C11orf84	0.0426795	0.0527539	0.0474435	0.0971351	0.0477861	0.0388094
C11orf85	0.0186341	0.0313304	0.150752	0.0223177	0.0317586	0
C11orf86	0	0	0	0	0	0
C11orf87	0.000520557	0.00312727	0.00060225	0.00219461	0.000432543	0.00613333
C11orf88	0.00563984	0.00362083	0.0647676	0.0181246	0.0154456	0.00352591
C11orf91	0.308561	0.165152	0.0281926	0.402249	0.317525	0.278691
C11orf94	0.008354	0.0176549	0	0	0.0106663	0
C11orf95	0.0784258	0.0904015	0.0537394	0.0531437	0.0785668	0.0908427
C11orf96	0.227407	0.21495	0.348125	0.370511	0.297555	0.44002
C11orf97	0.012924	0	0.0147676	0	0	0.000135354
C12orf10	0.407602	1.76109	1.50672	1.4108	1.50138	1.42312
C12orf29	1.17298	1.11814	1.02623	1.20879	1.07509	1.10792
C12orf36	0	0.000552779	0.0196065	0.0026224	0.00198473	0.010835
C12orf4	0.611016	0.589935	0.589472	0.515551	0.339863	0.502839
C12orf40	0	0.0159452	0.163356	0.0501021	0	0.0305935
C12orf42	0.0167352	0.0304041	0.19301	0.0342448	0.0011287	0.0324663
C12orf43	0.254269	0.770264	0.663458	0.464286	0.878886	0.691548
C12orf45	1.15733	2.0343	1.89616	1.11232	2.08906	1.96041
C12orf49	0.044775	0.0344725	0.0598953	0.0497231	0.0783887	0.0657016
C12orf5	0.221687	0.249501	0.20628	0.281838	0.473491	0.232004
C12orf50	0	0	0.0246836	0	0	0.0154662
C12orf54	0.0236939	0.0306018	0.141144	0.0164491	0.0475674	0.0798847
C12orf56	0.0574637	0.0358721	0.158218	0.00745566	0.00154462	0.0843254
C12orf57	9.13826	15.6491	15.94	9.47126	13.5837	15.2293
C12orf60	0.028313	0.0717443	0.0308152	0.045741	0.0206073	0.0651565
C12orf65	1.21008	2.12209	1.59494	1.16852	2.21025	0.985039
C12orf66	0.0430076	0.0488123	0.0879942	0.0383736	0.0696034	0.177254
C12orf71	0.00546066	0.00220554	0.040494	0.0147299	0.0120771	0
C12orf73	0.276532	0.716679	0.421595	0.350414	0.424168	0.416006
C12orf74	0.00733583	0.0172003	0.0276255	0.00371578	0	0
C12orf75	0.394122	0.246492	0.245788	0.167032	0.282099	0.264121
C12orf76	0.0105851	0.172165	0.298534	0.024497	0.157859	0.0603628
C12orf77	0	0	0.0959633	0.00521897	0	0.0200386
C12orf79	0.133846	0.149478	0.0747466	0.136215	0.191784	0.0836937
C12orf80	0	0.0196179	0.0166987	0.00252671	0	0.00201675
C14orf1	1.28023	1.43803	2.30787	3.75602	2.55836	2.68922
C14orf105	0.010052	0	0.0168086	0.0108783	0.00098982	0.00809809
C14orf119	2.65496	2.54896	1.81292	2.0651	2.06353	2.39903
C14orf132	0.357556	0.478919	0.536103	0.296247	0.395404	0.496755
C14orf142	0.605181	0.42397	0.605004	0.540293	0.559523	0.757233
C14orf159	1.41514	1.16789	1.58409	1.65827	1.11488	1.23459
C14orf166	3.04212	3.61954	3.93105	4.03732	3.68472	4.10214
C14orf169	0.0691434	0.0623697	0.0947725	0.0664173	0.110015	0.107677
C14orf177	0.0315424	0	0.105304	0.0312493	0	0.0409212
C14orf178	0.23032	0.250999	0.245286	0.223808	0.213598	0.17109
C14orf180	0	0	0.0230601	0	0	0
C14orf182	0.0621965	0.145677	0.0683431	0.0652697	0.123068	0.0919729
C14orf183	0.0142629	0.0116794	0.135502	0.0501091	0.0330755	0.0171555
C14orf2	9.35781	7.00813	8.69718	11.2779	8.27935	13.4923
C14orf23	0.102082	0.0306018	0.120015	0.102652	0.0187241	0.0546213
C14orf28	0.0641028	0.179871	0.0558706	0.154031	0.163827	0.109697
C14orf37	0.154344	0.193018	0.2009	0.149556	0.199292	0.149972
C14orf39	0	0	0.0152188	0	0	0.0325504
C14orf64	0.285604	0.50966	0.762046	0.362635	0.36087	0.267085
C14orf79	0.0340803	0.0540765	0.0761136	0.0223915	0.223121	0.0965647
C14orf80	0.0643198	0.0217434	0.0801058	0.0372867	0.0395484	0.046167
C14orf93	0.0651426	0.122141	0.140413	0.119501	0.17028	0.130891
C15orf26	0.0409765	0.0288017	0.159935	0.0297358	0.0465656	0.0141511
C15orf27	0.0258665	0.081281	0.238469	0.0536532	0.0187598	0.0379742
C15orf32	0	0	0.00231229	0.00178901	0.0218207	0
C15orf37	0.0106428	0.0109838	0.00391865	0.00652897	0.00559098	0.00426228
C15orf38-AP3S2	0.785803	0.589584	0.651345	0.907965	0.649052	0.890496
C15orf39	0.0574681	0.0687087	0.0826765	0.035915	0.107035	0.0536981
C15orf40	2.09303	1.95641	2.37045	2.06191	1.57031	1.65547
C15orf41	0.150573	0.40105	0.362309	0.232131	0.337442	0.219714
C15orf43	0.0319947	0.012988	0.194303	0.00878806	0.0142179	0.0193221
C15orf48	0.17813	0.463297	2.96716	2.63824	0.498231	1.72314
[truncated: 23,650 more rows]

## Sheet: RNAseq exact test DEG
	gene	logFC	logCPM	PValue
6753	HSPB3	-2.57126	6.96573	0.0703792
3174	COL1A1	-1.54668	12.0253	0.0862468
7659	KRT23	-1.25648	6.63389	1
3200	COL6A5	-1.24624	6.69998	0.625
12757	PSG8	-1.19903	6.38764	1
9382	MAPT	-1.1948	6.38796	1
11109	NR1D1	-1.18752	6.70776	0.625
5958	GOLGA6L5P	-1.16156	6.45666	1
2894	CHRND	-1.13966	6.35373	1
4442	EIF1	-1.11933	9.56571	0.193667
6459	HIGD1B	-1.11419	6.75224	0.625
7851	LGI3	-1.09145	6.34326	1
2722	CENPM	-1.08373	6.43433	1
2981	CLDN4	-1.08181	6.6736	0.625
17264	UBTF	-1.0772	6.48988	1
14966	SNAR-A10	-1.07364	6.35715	1
14967	SNAR-A11	-1.07364	6.35715	1
14968	SNAR-A14	-1.07364	6.35715	1
14969	SNAR-A3	-1.07364	6.35715	1
14970	SNAR-A4	-1.07364	6.35715	1
14971	SNAR-A5	-1.07364	6.35715	1
14972	SNAR-A6	-1.07364	6.35715	1
14973	SNAR-A7	-1.07364	6.35715	1
14974	SNAR-A8	-1.07364	6.35715	1
14975	SNAR-A9	-1.07364	6.35715	1
839	AQP7P1	-1.06367	6.43616	1
248	ADAMDEC1	-1.05639	6.37091	1
14978	SNAR-C3	-1.04286	6.38981	1
5321	FHAD1	-1.02564	6.38366	1
12504	PPP1R9B	-1.02087	6.38373	1
5952	GOLGA6D	-1.01211	6.36592	1
6114	GRAP	-1.00309	6.35612	1
11815	PDZD7	-0.995565	6.39639	1
10033	MIR6850	-0.991872	7.40465	0.42395
17850	ZACN	-0.98791	6.51878	1
10570	MYO18B	-0.98774	6.37161	1
4818	F11-AS1	-0.986976	6.34557	1
14341	SGCA	-0.978572	6.72816	0.625
18204	ZNF341	-0.969442	6.36871	1
2387	CCL23	-0.963757	6.5667	1
3833	DDX52	-0.962186	6.75829	0.625
10292	MRPL38	-0.96158	6.56196	1
14845	SLN	-0.95238	6.55845	1
16618	TNFRSF11B	-0.945698	6.548	1
5951	GOLGA6C	-0.936787	6.37873	1
3540	CUEDC1	-0.924269	6.36499	1
7184	ITGB4	-0.92234	6.54793	1
2037	CA7	-0.911015	6.35371	1
10260	MROH5	-0.900272	6.34119	1
6384	HEATR9	-0.896931	6.33504	1
14770	SLC5A3	-0.896417	6.51114	1
7655	KRT19	-0.89578	7.00508	0.726563
8750	LOC102723517	-0.894516	6.923	0.6875
3203	COL8A1	-0.887239	6.37316	1
3993	DLEC1	-0.884817	6.36066	1
7962	LINC00482	-0.884401	6.3459	1
2382	CCL19	-0.875941	9.03452	0.170591
9065	LRPAP1	-0.874897	6.48715	1
17863	ZBP1	-0.872943	6.33198	1
7162	ITGA2B	-0.872758	6.33658	1
11971	PHRF1	-0.872126	6.36999	1
6897	IGFBP4	-0.871839	8.41537	0.122915
5504	FRMPD3	-0.868724	6.32951	1
613	ANKFN1	-0.868319	6.41745	1
4259	DUSP14	-0.8671	6.84272	0.6875
2398	CCL5	-0.864956	7.59792	0.237886
16866	TRIM47	-0.86471	6.546	1
6254	GUCY2EP	-0.864281	6.36408	1
7653	KRT17	-0.863023	7.96704	0.248102
12729	PRSS38	-0.857455	6.32407	1
10066	MIR7843	-0.857257	6.3476	1
16445	TMEM199	-0.849281	6.43433	1
7845	LGALS9	-0.844871	6.71637	0.625
14992	SNHG16	-0.843982	7.66279	0.359286
11469	P2RY13	-0.843555	6.50319	1
3244	COPZ2	-0.839314	6.80337	1
2871	CHN1	-0.838707	6.63363	1
8092	LINC01091	-0.837805	6.62186	1
5949	GOLGA6A	-0.837791	6.40118	1
2896	CHRNG	-0.837202	6.33186	1
16991	TSPAN16	-0.836459	6.3574	1
13181	RASGEF1C	-0.83554	6.34075	1
5977	GOLGA8S	-0.835212	6.35181	1
4676	ERAP2	-0.834727	6.83824	0.6875
11175	NSRP1	-0.83345	7.05365	0.507813
16077	TECTB	-0.833298	6.33438	1
2250	CCDC108	-0.832656	6.35418	1
15312	SP2	-0.832634	6.39227	1
9121	LRRC8E	-0.831563	6.36059	1
17758	XAGE1B	-0.827899	6.35179	1
17759	XAGE1E	-0.827899	6.35179	1
2376	CCL14	-0.82766	9.04653	0.331034
5023	FAM231A	-0.823127	6.35491	1
15675	STRA13	-0.822004	7.12205	0.507813
1237	ATPIF1	-0.821751	7.60005	0.332307
2378	CCL15-CCL14	-0.819223	9.0416	0.3313
1236	ATPAF2	-0.818	6.43559	1
11471	P2RY6	-0.814609	6.34153	1
13176	RASAL3	-0.81435	6.36848	1
6539	HLA-DRA	-0.813318	8.86901	0.364847
2271	CCDC135	-0.811772	6.35228	1
4507	ELF3	-0.811757	6.87073	0.6875
10483	MUC17	-0.811435	6.3665	1
3292	CPAMD8	-0.805976	6.38785	1
9912	MIR5095	-0.805331	6.32293	1
10601	MYRF	-0.801926	6.35078	1
4992	FAM209B	-0.798556	6.34107	1
5968	GOLGA8G	-0.79654	6.38579	1
15292	SOSTDC1	-0.796144	7.91073	0.229542
8607	LOC101927934	-0.794354	6.34482	1
11018	NODAL	-0.794204	6.35257	1
40	ABCA17P	-0.793245	6.33575	1
5967	GOLGA8F	-0.788201	6.38618	1
2811	CGN	-0.787678	6.36733	1
2390	CCL27	-0.787329	6.75636	1
10988	NME2	-0.785866	7.39433	0.42395
10714	NCAN	-0.784579	6.35733	1
11044	NOS1AP	-0.784042	6.33552	1
2993	CLEC17A	-0.781169	6.37474	1
337	ADRBK2	-0.781015	6.45176	1
12669	PROSER2-AS1	-0.779805	6.36404	1
2656	CDKN2B-AS1	-0.778949	6.34784	1
16930	TRPC5OS	-0.778886	6.33108	1
7515	KIF5C	-0.778834	6.38863	1
14615	SLC25A42	-0.778586	6.34135	1
10282	MRPL27	-0.778305	7.8181	0.28628
13856	RSPO1	-0.778154	6.5184	1
15907	TAOK1	-0.777255	6.68925	0.625
8702	LOC101929378	-0.77468	6.32905	1
6151	GRK4	-0.771615	6.36747	1
6161	GRN	-0.770615	7.03857	0.726563
14624	SLC25A6	-0.769352	8.13764	0.221876
1983	C8orf22	-0.768835	6.54005	1
239	ADAM2	-0.76756	6.34059	1
3234	COPRS	-0.766727	6.62052	1
14137	SEC14L3	-0.765854	6.33293	1
14071	SCN4A	-0.764529	6.33397	1
10259	MROH2B	-0.763833	6.34142	1
9106	LRRC59	-0.763661	6.47339	1
15098	SNORD114-3	-0.763251	6.37993	1
16244	TIMD4	-0.762629	6.44881	1
7634	KPTN	-0.761528	6.39398	1
5955	GOLGA6L17P	-0.761193	6.37683	1
3479	CTB-178M22.2	-0.761159	6.33341	1
6269	GYG2	-0.761145	6.36147	1
3102	CNN1	-0.761004	7.23481	0.548828
16332	TMC8	-0.760554	6.34547	1
7304	KCND1	-0.757164	6.32573	1
16085	TEN1	-0.757028	6.54228	1
15744	SULT2B1	-0.757015	6.45785	1
3044	CLPP	-0.756982	6.43395	1
2532	CD79B	-0.756162	6.58094	1
17506	VIL1	-0.754673	6.34601	1
13667	RPH3AL	-0.754151	6.45124	1
12754	PSG5	-0.753389	6.3358	1
16086	TEN1-CDK3	-0.753052	6.54174	1
6135	GRID2IP	-0.750909	6.34316	1
15777	SUV420H2	-0.749609	6.34354	1
17345	UNK	-0.746304	6.37929	1
1528	BRCA1	-0.745938	6.38297	1
2301	CCDC173	-0.745875	6.4969	1
3206	COL9A2	-0.744254	6.35978	1
5507	FRRS1L	-0.743471	6.33746	1
12913	PTRF	-0.74136	8.38339	0.187124
7777	LBP	-0.738988	6.33677	1
11157	NRROS	-0.738702	6.3493	1
12753	PSG4	-0.738614	6.31862	1
17320	ULK2	-0.738264	6.42411	1
14831	SLFN5	-0.737569	7.56021	0.332307
15321	SPAG11A	-0.736157	6.34111	1
13589	RNF43	-0.735748	6.32732	1
18316	ZNF529	-0.73503	6.37789	1
6414	HERC2P4	-0.734976	6.37584	1
14699	SLC36A2	-0.734595	6.35382	1
15530	SSPO	-0.732934	6.35842	1
15499	SRSF1	-0.732706	6.61302	1
16760	TPSB2	-0.732412	7.22186	0.548828
3402	CRYBA4	-0.730977	6.35155	1
14139	SEC14L5	-0.729946	6.33948	1
10068	MIR7848	-0.728619	6.32818	1
7949	LINC00380	-0.728227	6.34187	1
8142	LINC01252	-0.727634	6.366	1
13969	SAP30BP	-0.727607	7.7857	0.28628
12845	PTGES3L	-0.726098	6.34731	1
3575	CXCL2	-0.726072	7.45654	0.607239
16087	TENC1	-0.725586	7.14731	0.753906
17187	UBAP1L	-0.725538	6.35554	1
8528	LOC101927069	-0.724989	6.59895	1
14030	SCARNA21	-0.724838	6.36695	1
4633	EPB42	-0.723242	6.32484	1
9137	LRTM1	-0.723201	6.38875	1
13666	RPH3A	-0.723007	6.34332	1
29	AARSD1	-0.722818	7.03527	0.726563
14755	SLC4A4	-0.721775	6.35548	1
7839	LGALS3BP	-0.72109	6.97669	0.726563
4600	ENPP2	-0.72086	8.27772	0.223252
3407	CRYGA	-0.720648	6.33471	1
10640	NACAD	-0.720169	6.36527	1
3701	DAND5	-0.719855	6.33573	1
3780	DCXR	-0.71879	6.54101	1
11470	P2RY14	-0.717694	6.88583	0.6875
7737	LAMC3	-0.717199	6.58582	1
15305	SOX9	-0.716909	6.63943	1
6015	GPC2	-0.715983	6.34553	1
5286	FGD2	-0.715975	6.45817	1
15859	TAC4	-0.715882	6.35069	1
2872	CHN2	-0.71395	6.458	1
3504	CTIF	-0.7129	6.36575	1
619	ANKK1	-0.712663	6.35168	1
1808	C1orf168	-0.71259	6.33321	1
5779	GHDC	-0.711043	6.38714	1
6245	GTSF1	-0.710881	6.34139	1
8588	LOC101927688	-0.710701	6.45974	1
1727	C17orf53	-0.709212	6.3628	1
3169	COL14A1	-0.708728	8.24347	0.196587
4950	FAM173B	-0.708484	8.14137	0.28691
8344	LOC100272216	-0.708221	6.34287	1
8579	LOC101927604	-0.708216	6.33003	1
13369	RFX2	-0.707914	6.6017	1
2999	CLEC2A	-0.707876	6.60969	1
1815	C1orf195	-0.705568	6.32948	1
12338	POLR2E	-0.705218	6.71836	1
14767	SLC5A11	-0.7033	6.33537	1
421	AIFM3	-0.702243	6.32491	1
13336	REREP3	-0.700855	6.35843	1
17480	VAT1	-0.699645	7.57248	0.332307
3386	CROCC	-0.699302	6.35152	1
18438	ZNF682	-0.697751	6.40271	1
14626	SLC26A11	-0.693753	6.33717	1
8942	LOC645752	-0.693063	6.34589	1
8749	LOC102723505	-0.693061	6.67067	1
501	ALDOC	-0.692852	6.89796	0.6875
2172	CASC3	-0.69276	6.87311	0.6875
10628	NAA60	-0.692572	6.42832	1
15094	SNORD114-20	-0.69206	6.49987	1
4084	DNAJC22	-0.690831	6.3304	1
7909	LINC00111	-0.690544	6.32201	1
14230	SEPT7P9	-0.68963	6.35901	1
8398	LOC100506023	-0.689533	6.33531	1
11712	PCOLCE-AS1	-0.687937	6.64744	1
14807	SLC9A5	-0.687696	6.37169	1
12171	PLEKHA4	-0.687355	7.31611	0.581055
18321	ZNF541	-0.686471	6.34528	1
5274	FER1L5	-0.686228	6.34759	1
1028	ARSG	-0.685748	6.41516	1
13030	RAB34	-0.685495	7.00307	0.726563
17696	WEE2-AS1	-0.685244	6.35027	1
17080	TTR	-0.684414	6.36337	1
9225	LYZ	-0.683202	9.45238	0.373417
10486	MUC3A	-0.68253	6.32886	1
7230	JAKMIP1	-0.682102	6.34285	1
2440	CCR8	-0.681139	6.35346	1
8003	LINC00673	-0.680866	6.34889	1
4356	EDN1	-0.680772	7.0454	0.726563
585	ANAPC11	-0.68034	8.42299	0.255504
4089	DNAJC27-AS1	-0.68033	6.54706	1
13724	RPL38	-0.679042	10.6652	0.413086
4250	DUS1L	-0.678955	6.45721	1
10604	MYT1L	-0.678435	6.32732	1
16292	TLL2	-0.678322	6.37191	1
907	ARHGDIA	-0.677724	6.52626	1
10839	NEFH	-0.676906	6.3812	1
8228	LLGL2	-0.676799	6.37335	1
13976	SARDH	-0.676737	6.32497	1
3753	DCLK1	-0.676313	6.60863	1
6125	GREM2	-0.675807	6.46733	1
14335	SFTA3	-0.675657	6.3212	1
6334	HBA2	-0.675556	6.86547	0.6875
9962	MIR632	-0.675301	7.50333	0.454499
3908	DGKI	-0.674378	6.34232	1
3951	DHX8	-0.673937	7.0092	0.726563
14749	SLC4A1	-0.673868	6.32488	1
16759	TPSAB1	-0.673751	7.04712	0.726563
7528	KIRREL3	-0.672066	6.35035	1
14552	SLC1A2	-0.67171	6.37371	1
11916	PGM5P4-AS1	-0.670714	6.47807	1
5418	FMO3	-0.670428	6.41368	1
13685	RPL19	-0.670406	10.284	0.417608
5648	GALP	-0.66971	6.32758	1
2861	CHMP1B2P	-0.669377	6.35308	1
5869	GLUD1P7	-0.669306	6.37637	1
16975	TSKS	-0.66883	6.33327	1
8381	LOC100505622	-0.668611	6.31866	1
17311	UHRF1	-0.668601	6.36274	1
12040	PIK3R6	-0.668377	6.35048	1
10878	NF1	-0.667771	6.51125	1
3420	CSF2RA	-0.667634	6.71754	1
14370	SH2D1B	-0.667621	6.3207	1
8065	LINC00968	-0.667207	6.51801	1
15410	SPON1	-0.667162	6.77593	1
12129	PLAC8	-0.66663	6.36896	1
3805	DDX12P	-0.66598	6.36692	1
7666	KRT39	-0.66361	6.32846	1
16857	TRIM37	-0.663471	6.44018	1
2327	CCDC47	-0.662716	6.79553	1
10228	MPP4	-0.662644	6.32652	1
7301	KCNAB3	-0.662201	6.32965	1
3950	DHX58	-0.662165	6.44638	1
12789	PSMD12	-0.660546	6.87276	0.6875
1524	BPTF	-0.660444	7.12559	0.753906
128	ACAN	-0.660375	6.41634	1
16262	TIMP2	-0.659826	8.16287	0.223397
8036	LINC00888	-0.659483	6.45355	1
5266	FDXR	-0.659407	6.32078	1
2337	CCDC64	-0.659404	6.34177	1
12694	PRR12	-0.659069	6.33126	1
13867	RTDR1	-0.659008	6.35584	1
14223	2004-09-01	-0.657513	6.61214	1
5151	FAT3	-0.657251	6.35488	1
11373	OR4N3P	-0.656831	6.36696	1
13047	RAB43	-0.656812	6.33676	1
13272	RBP5	-0.656385	6.98382	0.726563
14612	SLC25A39	-0.655597	6.49331	1
5382	FLJ33360	-0.65555	6.32769	1
12152	PLCH1	-0.655424	6.33594	1
9714	MIR1182	-0.65534	6.35425	1
436	AK7	-0.654799	6.37381	1
6293	H3F3B	-0.653551	12.1508	0.455178
8712	LOC101929528	-0.653506	6.32527	1
5273	FER1L4	-0.652254	6.38464	1
11904	PGLS	-0.652213	6.42281	1
6744	HSPA5	-0.652051	7.86663	0.307456
813	APOL1	-0.651996	6.80143	1
17764	XDH	-0.651898	6.37167	1
11915	PGM5P3-AS1	-0.651887	6.47495	1
9323	MAP2K3	-0.650929	6.5292	1
10509	MXRA7	-0.650325	6.88114	0.6875
63	ABCC3	-0.649647	6.40509	1
12625	PRKCG	-0.649584	6.37001	1
5769	GGH	-0.649404	6.40577	1
2820	CHAF1A	-0.648905	6.38471	1
14642	SLC28A2	-0.648477	6.34584	1
12838	PTGDS	-0.647873	8.79519	0.378606
9839	MIR3976HG	-0.647807	6.31966	1
299	ADD2	-0.647515	6.34436	1
1519	BPIFA2	-0.64714	6.32773	1
7947	LINC00368	-0.64672	6.32672	1
2732	CEP112	-0.646665	6.56847	1
9713	MIR1181	-0.646614	6.68845	1
5736	GDPD1	-0.645898	6.33672	1
14134	SEC14L1	-0.645779	6.59362	1
17067	TTLL1	-0.645312	6.4532	1
8667	LOC101928834	-0.644999	6.4643	1
13182	RASGRF1	-0.644709	6.33157	1
9287	MAMDC2-AS1	-0.644469	6.37295	1
3274	COX4I2	-0.644436	7.22971	0.548828
9092	LRRC37BP1	-0.64389	6.43371	1
3674	CYSLTR2	-0.643429	6.37492	1
15971	TBCB	-0.642395	6.71062	1
7466	KIAA1549L	-0.641791	6.34017	1
11285	NWD1	-0.641763	6.3446	1
6068	GPR21	-0.641404	6.34689	1
774	APCDD1	-0.641256	7.59277	0.480684
5925	GNGT2	-0.640818	6.33578	1
10465	MTRNR2L2	-0.640742	7.43412	0.607239
3719	DBF4B	-0.640299	6.34202	1
10517	MYBPC2	-0.640075	6.33035	1
18463	ZNF710	-0.640039	6.34052	1
15339	SPATA20	-0.639874	6.57833	1
9901	MIR4800	-0.639774	6.33425	1
9259	MAGEB3	-0.639585	6.33175	1
8015	LINC00824	-0.63951	6.34278	1
11003	NMT1	-0.638931	7.36466	0.581055
16211	THRA	-0.638423	6.67754	1
15225	SNTB2	-0.638327	6.7211	1
13128	RAMP2	-0.638165	6.77966	1
11893	PGAP3	-0.638131	6.396	1
7059	INSL3	-0.637776	6.3595	1
12615	PRKAR1A	-0.636627	6.98589	0.726563
11287	NXF3	-0.636379	6.32632	1
14199	SEMA6C	-0.636357	6.35544	1
1149	ATP10A	-0.636204	6.46894	1
6891	IGF2BP1	-0.635672	6.32698	1
10497	MVB12A	-0.635653	6.38915	1
13806	RPTOR	-0.635533	6.34402	1
7465	KIAA1549	-0.63492	6.35153	1
17921	ZC3H7B	-0.634429	6.36971	1
1606	BZRAP1	-0.634359	6.32283	1
7651	KRT16	-0.634298	7.09765	1
16559	TMEM92	-0.63415	6.31451	1
242	ADAM28	-0.63403	6.45166	1
2401	CCM2L	-0.63387	6.33557	1
5497	FRMD5	-0.633804	6.36456	1
1812	C1orf189	-0.633225	6.33077	1
5054	FAM50A	-0.631572	6.44944	1
9991	MIR6740	-0.630992	6.3245	1
9756	MIR181A1HG	-0.630596	6.44494	1
18210	ZNF35	-0.630445	6.4785	1
8747	LOC102723385	-0.628285	6.33028	1
12751	PSG10P	-0.628268	6.33416	1
3825	DDX42	-0.628173	6.78001	1
10709	NBR2	-0.627672	6.43358	1
60	ABCC11	-0.627491	6.33092	1
12846	PTGES3L-AARSD1	-0.627437	7.00978	0.726563
3803	DDX11	-0.627345	6.40174	1
4920	FAM153B	-0.626615	6.33273	1
440	AKAP10	-0.626312	6.44174	1
7149	ISPD-AS1	-0.626164	6.34606	1
9446	MBTD1	-0.626064	6.39041	1
9030	LPO	-0.624887	6.32754	1
7405	KHK	-0.624542	6.41477	1
5431	FNDC1	-0.624127	6.57474	1
17123	TVP23A	-0.623924	6.3772	1
4428	EHD1	-0.623465	6.44301	1
17725	WNK2	-0.62331	6.3675	1
16330	TMC6	-0.622585	6.40219	1
13414	RGS9	-0.622478	6.35778	1
4860	FAM104A	-0.622114	6.44928	1
2699	CELA3B	-0.621586	6.35874	1
6848	IFI35	-0.620628	6.91004	0.6875
4977	FAM195B	-0.620583	6.54769	1
14882	SMARCE1	-0.6189	7.53643	0.454499
4777	EXD3	-0.618628	6.34621	1
2731	CEP104	-0.618224	6.44658	1
6454	HIF1A-AS1	-0.618021	6.43543	1
12872	PTPLAD2	-0.617966	6.41701	1
15760	SUPT4H1	-0.617827	7.49995	0.454499
5991	GOSR1	-0.61773	7.46722	0.607239
16670	TNS4	-0.617297	6.45127	1
2209	CAV3	-0.617286	6.33032	1
12756	PSG7	-0.616102	6.34872	1
14923	SMIM3	-0.616019	6.68421	1
11073	NPFFR2	-0.615849	6.41188	1
2470	CD19	-0.615667	6.34805	1
7827	LEPREL4	-0.615573	6.46565	1
6105	GPX4	-0.614542	6.69136	1
2309	CCDC183	-0.613684	6.3408	1
7650	KRT15	-0.613063	8.61968	0.622906
12217	PLOD3	-0.612329	6.68684	1
9865	MIR4458	-0.612322	6.32699	1
6544	HLA-F	-0.61172	6.50042	1
6873	IFT20	-0.611698	6.59173	1
13471	RINL	-0.611697	6.4191	1
1052	ASB4	-0.610514	6.33906	1
17341	UNC80	-0.610087	6.35834	1
11318	OCM	-0.609951	6.35119	1
7916	LINC00174	-0.609764	6.36905	1
14473	SIRT6	-0.60973	6.37317	1
15547	SSX4B	-0.609303	6.33043	1
15015	SNORA17	-0.609193	6.33172	1
16449	TMEM201	-0.609003	6.3243	1
17089	TUBA3FP	-0.608479	6.31507	1
2501	CD320	-0.607987	6.41748	1
13659	RPE65	-0.607133	6.32131	1
8004	LINC00674	-0.607113	6.55773	1
15619	STAT3	-0.60684	7.30036	0.581055
6699	HS3ST2	-0.606768	6.37035	1
17713	WIF1	-0.606579	7.28322	0.774414
6527	HLA-B	-0.606214	7.65591	0.368239
2995	CLEC18B	-0.606047	6.35407	1
7682	KRT8	-0.60586	6.91826	1
18503	ZNF780B	-0.605626	6.50811	1
1175	ATP2B1	-0.605377	6.80889	1
1438	BGN	-0.605267	7.39318	0.581055
14437	SIDT1	-0.605077	6.40211	1
3627	CYP1A1	-0.604981	6.35927	1
15251	SNX29P2	-0.604281	6.39349	1
17363	UQCC3	-0.604016	6.44651	1
11319	OCM2	-0.603901	6.3259	1
11785	PDIA5	-0.603668	6.70779	1
17732	WNT3	-0.602981	6.34258	1
11554	PAPSS2	-0.602694	6.44623	1
1756	C19orf45	-0.602558	6.31834	1
5930	GNLY	-0.601994	6.49487	1
9475	MCOLN2	-0.601831	6.37179	1
12855	PTH1R	-0.600685	6.37521	1
15979	TBKBP1	-0.600136	6.34051	1
5966	GOLGA8EP	-0.600053	6.33968	1
15868	TADA2A	-0.599831	6.59333	1
5992	GOSR2	-0.599687	7.01479	0.726563
17233	UBE2Z	-0.599659	6.61812	1
12656	PRND	-0.599603	6.37744	1
2421	CCNJ	-0.598831	6.35848	1
16942	TRPT1	-0.59865	6.5372	1
8630	LOC101928266	-0.598304	6.3346	1
15854	TAB1	-0.598276	6.36252	1
2324	CCDC40	-0.597964	6.33312	1
9694	MIF4GD	-0.59751	6.88853	0.6875
7605	KLRC2	-0.596795	6.33653	1
15540	SSUH2	-0.596631	6.34437	1
3678	CYTH3	-0.596495	6.39579	1
5426	FN3K	-0.596325	6.3302	1
8736	LOC102467147	-0.596197	6.36382	1
15829	SYNPO2L	-0.596092	6.33518	1
7174	ITGAM	-0.59602	6.44885	1
15073	SNORA9	-0.595974	6.41502	1
16076	TECTA	-0.595959	6.32909	1
6279	GZMK	-0.595914	6.45571	1
7877	LILRA5	-0.595568	6.34579	1
13479	RIPK4	-0.594706	6.34547	1
15588	STAC3	-0.593886	6.37038	1
15974	TBCD	-0.593718	6.82307	1
12413	PPARA	-0.59353	6.45665	1
13547	RNF157	-0.593403	6.34383	1
7633	KPNB1	-0.593362	7.2549	0.548828
2245	CCDC102A	-0.593326	6.35265	1
16767	TPTE2	-0.593171	6.32305	1
9035	LPPR2	-0.59315	6.37712	1
999	ARNT2	-0.592716	6.33631	1
4556	EME1	-0.592323	6.39717	1
14854	SLX4	-0.592196	6.3457	1
6770	HTR3D	-0.591646	6.32641	1
10209	MOV10L1	-0.591597	6.33089	1
14174	SELM	-0.591513	6.60696	1
6243	GTSCR1	-0.591048	6.34873	1
12915	PTRH2	-0.590167	6.91013	1
10403	MT1M	-0.589432	8.43482	0.436494
15582	ST8SIA5	-0.589132	6.33638	1
3258	CORO2A	-0.588935	6.41718	1
10639	NACA2	-0.588325	9.24647	0.501668
1073	ASMT	-0.588306	6.34795	1
2151	CARD10	-0.588194	6.36016	1
15067	SNORA7A	-0.588036	6.55496	1
2519	CD52	-0.587781	8.95223	0.414804
6120	GRB2	-0.585836	7.12787	0.753906
11687	PCED1B-AS1	-0.585723	6.79617	1
5564	FXYD7	-0.58539	6.32785	1
17070	TTLL13	-0.58519	6.38578	1
6813	ICOS	-0.584999	6.36285	1
15546	SSX4	-0.584967	6.32905	1
16243	TIGIT	-0.583998	6.43767	1
17331	UNC13A	-0.583064	6.35719	1
16580	TMPRSS13	-0.582907	6.37943	1
2666	CDR2L	-0.582605	6.6043	1
2634	CDK3	-0.582077	6.38063	1
683	ANKRD7	-0.581731	6.33157	1
191	ACSM5	-0.581532	6.49446	1
12819	PTAFR	-0.58124	6.6709	1
9226	LYZL4	-0.58121	6.33113	1
9089	LRRC37A4P	-0.581033	6.42445	1
10162	MMP9	-0.580969	6.47331	1
10312	MRPL55	-0.580746	6.92908	1
11472	P2RY8	-0.579043	6.31311	1
7556	KLHDC4	-0.578563	6.36905	1
10053	MIR6891	-0.57854	6.57845	1
10969	NLGN3	-0.578536	6.31998	1
3989	DKKL1	-0.578285	6.33147	1
4375	EEFSEC	-0.578101	6.35818	1
3173	COL18A1	-0.578094	6.64948	1
12769	PSMB10	-0.578032	7.12244	0.753906
1739	C17orf99	-0.578019	6.33797	1
16562	TMEM98	-0.57785	7.43821	0.607239
68	ABCC8	-0.577751	6.36747	1
8641	LOC101928386	-0.577359	6.34961	1
6844	IFI27	-0.577223	10.749	0.304195
7600	KLKP1	-0.576957	6.32264	1
1861	C21orf91-OT1	-0.576758	6.45204	1
2604	CDH23	-0.576369	6.38414	1
16635	TNFSF15	-0.576065	6.33105	1
3168	COL13A1	-0.575221	6.42267	1
10371	MSI2	-0.575187	6.3254	1
8867	LOC388882	-0.574899	6.33338	1
13349	RFC2	-0.574891	6.59354	1
7260	JUP	-0.574866	7.01084	0.726563
17532	VPS13A	-0.574772	6.48153	1
3571	CXCL13	-0.573953	6.34471	1
10485	MUC20	-0.572813	6.47093	1
8746	LOC102723373	-0.572617	6.31264	1
311	ADIG	-0.572374	6.32451	1
12771	PSMB3	-0.572358	8.90327	0.490479
16146	TFR2	-0.572256	6.34414	1
7930	LINC00303	-0.571313	6.32931	1
15717	STYK1	-0.571241	6.32909	1
7451	KIAA1257	-0.571072	6.35524	1
12758	PSG9	-0.571052	6.32345	1
3576	CXCL3	-0.570598	6.64193	1
11530	PAM16	-0.570577	6.43765	1
2123	CAND2	-0.570494	6.37257	1
16969	TSHB	-0.570412	6.32987	1
12545	PQLC2	-0.570016	6.35428	1
14222	2003-09-01	-0.56987	6.3437	1
10389	MST1R	-0.569856	6.33272	1
16573	TMOD4	-0.56906	6.33649	1
13066	RABEP2	-0.568972	6.36028	1
13703	RPL27	-0.568795	10.7012	0.503132
10917	NGFR	-0.568718	6.37747	1
17082	TTYH2	-0.568332	6.36359	1
13368	RFX1	-0.568219	6.32674	1
13574	RNF217-AS1	-0.567593	6.37303	1
18280	ZNF474	-0.566822	6.31833	1
8977	LOC729506	-0.566581	6.32436	1
17587	VWA5B1	-0.566489	6.32568	1
9408	MAST1	-0.566394	6.3301	1
6999	IL7	-0.566007	6.54311	1
15798	SYCE2	-0.565982	6.33502	1
12014	PIGR	-0.565842	6.3892	1
18057	ZNF101	-0.565442	6.39943	1
7513	KIF5A	-0.565422	6.34455	1
6526	HLA-A	-0.564714	7.39623	0.790527
11189	NT5C3B	-0.564147	6.35706	1
6584	HMP19	-0.564029	6.34135	1
7757	LARGE	-0.563934	6.45605	1
17879	ZBTB26	-0.563251	6.33045	1
12093	PKHD1	-0.563057	6.33505	1
10159	MMP28	-0.563041	6.33435	1
5666	GAS2	-0.562955	6.37134	1
16970	TSHR	-0.562883	6.3257	1
17717	WIPI1	-0.562756	6.84741	0.6875
6652	HOXB7	-0.562696	6.63877	1
10588	MYO9B	-0.562431	6.43422	1
1926	C4orf51	-0.561786	6.31877	1
13842	RSAD1	-0.561523	6.43101	1
10328	MRPS23	-0.561193	7.12394	0.753906
10062	MIR765	-0.56073	6.32355	1
8232	LMAN2	-0.560669	6.77759	1
1831	C1orf54	-0.560517	7.03998	0.726563
16118	TEX37	-0.560425	6.32907	1
8277	LOC100128714	-0.559777	6.34294	1
3943	DHX34	-0.559237	6.3481	1
3261	CORO7-PAM16	-0.559007	6.45565	1
5613	GADD45B	-0.558976	8.65947	0.357794
5485	FRAS1	-0.558727	6.35546	1
8900	LOC440446	-0.558394	6.3178	1
12074	PITPNM3	-0.557875	6.31711	1
16691	TONSL	-0.557588	6.32902	1
2698	CELA3A	-0.556944	6.33407	1
13692	RPL23	-0.55683	10.4403	0.521807
7946	LINC00367	-0.556741	6.34592	1
5500	FRMD6-AS2	-0.556105	6.32632	1
10960	NKG7	-0.556007	6.49836	1
877	ARHGAP18	-0.555382	7.1966	0.753906
3763	DCST1	-0.555376	6.35104	1
5156	FBF1	-0.554818	6.32147	1
13095	RAD51C	-0.554791	7.00695	0.726563
15123	SNORD21	-0.554351	6.33975	1
7107	IQGAP3	-0.554319	6.36915	1
2326	CCDC43	-0.554212	6.59269	1
284	ADCK4	-0.553427	6.41948	1
17617	WBSCR17	-0.553211	6.34579	1
12294	POC1A	-0.553084	6.34845	1
286	ADCY1	-0.552742	6.34528	1
11686	PCED1B	-0.55201	6.48256	1
9205	LYPD4	-0.551827	6.33234	1
13096	RAD51D	-0.551678	6.40868	1
2189	CASP8	-0.551645	6.66031	1
15755	SUN5	-0.550614	6.31336	1
14856	SMA4	-0.549653	6.64465	1
3428	CSMD2	-0.549312	6.35583	1
6319	HAS2-AS1	-0.548753	8.06867	0.364539
14123	SDK2	-0.548748	6.36474	1
17130	TWIST2	-0.548649	6.64078	1
17416	USP32P2	-0.548617	6.35951	1
11595	PATL1	-0.548167	6.47718	1
5548	FUT11	-0.547988	6.40847	1
17046	TTC33	-0.547973	6.90587	1
1338	BANP	-0.547877	6.37158	1
11727	PDAP1	-0.547657	6.60996	1
3254	CORIN	-0.547367	6.94754	1
7403	KHDRBS2	-0.547106	6.3326	1
9062	LRP5L	-0.547035	6.38294	1
8657	LOC101928674	-0.54693	6.34949	1
4821	F13A1	-0.546842	8.71593	0.488027
14673	SLC34A2	-0.546212	6.3523	1
14743	SLC46A1	-0.545934	6.34776	1
524	ALKBH5	-0.5459	6.87785	0.6875
12121	PLA2G4D	-0.545188	6.34327	1
6537	HLA-DQB1	-0.543516	7.80835	0.404874
1166	ATP1A2	-0.543293	6.48757	1
14511	SLC12A3	-0.543	6.35417	1
3670	CYP7B1	-0.542992	6.4137	1
10562	MYLK4	-0.542841	6.3375	1
14772	SLC5A5	-0.542805	6.34857	1
3786	DDC	-0.542721	6.33396	1
15130	SNORD29	-0.542582	6.46127	1
6383	HEATR6	-0.542409	6.46966	1
11281	NUTM1	-0.542296	6.35056	1
6095	GPS1	-0.542077	6.40641	1
14804	SLC9A3R1	-0.541922	6.47435	1
7900	LIN7A	-0.541397	6.49149	1
17742	WSCD1	-0.541002	6.31849	1
8307	LOC100130849	-0.540991	6.32035	1
11711	PCOLCE	-0.540972	8.08563	0.364048
11047	NOSIP	-0.540921	6.55984	1
8831	LOC284798	-0.54089	6.32797	1
8035	LINC00887	-0.540856	6.34127	1
1718	C16orf87	-0.540753	6.56656	1
16890	TRIM72	-0.540525	6.33278	1
8613	LOC101928035	-0.53967	6.31265	1
14793	SLC7A6	-0.539429	6.53804	1
16923	TROAP	-0.53882	6.33688	1
3567	CXCL1	-0.53845	6.66724	1
14976	SNAR-B1	-0.538425	6.37865	1
14977	SNAR-B2	-0.538425	6.37865	1
2350	CCDC79	-0.538416	6.33028	1
4677	ERBB2	-0.538331	6.56636	1
8550	LOC101927267	-0.538157	6.32574	1
1420	BECN1	-0.537896	7.17956	0.753906
4258	DUSP13	-0.537771	6.33045	1
9805	MIR320D2	-0.537733	6.30846	1
13185	RASGRP2	-0.537205	6.37186	1
9218	LYRM9	-0.536707	6.70887	1
17481	VAT1L	-0.536619	6.35089	1
12123	PLA2G4F	-0.536543	6.38652	1
13079	RAC2	-0.536347	6.74035	1
2393	CCL3L1	-0.536342	6.48864	1
8504	LOC101926895	-0.536119	6.35313	1
7983	LINC00630	-0.535546	6.48257	1
3653	CYP3A7	-0.535541	6.33442	1
6892	IGF2BP2	-0.53502	6.37982	1
3654	CYP3A7-CYP3AP1	-0.534846	6.33445	1
9916	MIR5190	-0.534672	6.32493	1
14390	SH3GL3	-0.534296	6.35187	1
10986	NME1	-0.534033	7.7342	0.503447
12916	PTRHD1	-0.534009	6.65151	1
5510	FRY-AS1	-0.533859	6.33074	1
8327	LOC100133050	-0.533797	6.3764	1
7920	LINC00239	-0.533434	6.33193	1
11381	OR8S1	-0.53305	6.32358	1
7279	KAT7	-0.532745	6.49001	1
2394	CCL3L3	-0.532659	6.48732	1
986	ARMC6	-0.532314	6.36094	1
15955	TBC1D3	-0.531676	6.3316	1
11884	PGA4	-0.531335	6.43709	1
17336	UNC45B	-0.531321	6.33026	1
360	AGAP11	-0.531309	6.51193	1
1857	C21orf62	-0.531163	6.3348	1
12056	PIP4K2B	-0.531035	6.50087	1
4959	FAM179A	-0.53058	6.33321	1
17420	USP36	-0.530049	6.65414	1
1013	ARR3	-0.529758	6.34191	1
3642	CYP2C9	-0.529633	6.32547	1
8038	LINC00892	-0.529485	6.44897	1
854	ARF1	-0.52923	7.45882	0.607239
16338	TMCO4	-0.528987	6.39232	1
15606	STARD13	-0.528766	6.98237	0.726563
3165	COIL	-0.52846	6.78552	1
11062	NPAS1	-0.528279	6.34143	1
11509	PAGE5	-0.528257	6.33307	1
3639	CYP2B7P	-0.528212	6.34362	1
17268	UBXN11	-0.527696	6.72615	1
16331	TMC7	-0.527371	6.34126	1
9082	LRRC31	-0.527107	6.32558	1
1633	C11orf24	-0.527096	6.44807	1
13407	RGS22	-0.526966	6.74273	1
18083	ZNF157	-0.526705	6.31126	1
19	AAED1	-0.525951	6.48218	1
9176	LUC7L3	-0.525636	7.48859	0.607239
3933	DHRS7B	-0.525127	7.21304	0.753906
6333	HBA1	-0.525122	6.5794	1
12071	PITPNC1	-0.52503	6.40336	1
3625	CYP17A1	-0.524617	6.33453	1
18366	ZNF584	-0.524337	6.36796	1
14713	SLC38A7	-0.524328	6.42941	1
14481	SKA2	-0.524223	6.67659	1
2729	CENPV	-0.524168	6.39845	1
11825	PEAR1	-0.524051	6.42417	1
9817	MIR3648-1	-0.523858	6.37556	1
16934	TRPM2	-0.523812	6.33003	1
15012	SNORA14A	-0.523596	6.33837	1
4812	EZH1	-0.523318	6.8666	0.6875
7254	JRKL	-0.523163	6.57874	1
7656	KRT19P2	-0.522995	6.32856	1
11864	PEX6	-0.522674	6.45476	1
7348	KCNU1	-0.522651	6.33116	1
8865	LOC388553	-0.522379	6.32252	1
16111	TEX26	-0.522085	6.32147	1
7250	JPH1	-0.521629	6.34801	1
4097	DNAJC7	-0.52152	6.86926	0.6875
5957	GOLGA6L4	-0.521128	6.34221	1
11885	PGA5	-0.521061	6.44282	1
15119	SNORD1A	-0.521045	6.32822	1
14327	SFRP2	-0.520421	8.72477	0.340757
8467	LOC100507530	-0.51984	6.42129	1
9429	MBD3	-0.519772	6.37057	1
12731	PRSS46	-0.519675	6.3308	1
14443	SIGLEC17P	-0.519407	6.43767	1
14797	SLC7A9	-0.519313	6.36317	1
469	AKR7L	-0.519276	6.33546	1
15383	SPHK1	-0.519226	6.37913	1
2059	CACNA1G	-0.518948	6.3199	1
1971	C7orf31	-0.518943	6.33302	1
13884	RUNDC1	-0.51835	6.40261	1
5865	GLTSCR1	-0.518334	6.31623	1
10978	NLRP12	-0.518177	6.33119	1
8880	LOC400655	-0.518154	6.31698	1
1189	ATP5H	-0.517787	7.59163	0.480684
447	AKAP6	-0.517741	6.43001	1
590	ANAPC2	-0.517422	6.32255	1
4196	DPYSL5	-0.517264	6.32334	1
15712	STXBP3	-0.517034	7.3802	0.790527
10276	MRPL2	-0.51653	6.76518	1
10566	MYO15A	-0.516385	6.34446	1
8278	LOC100128770	-0.515895	6.33941	1
8152	LINC01273	-0.515863	6.34928	1
18497	ZNF771	-0.515557	6.32055	1
7221	IZUMO3	-0.51555	6.35786	1
12177	PLEKHB1	-0.515302	6.37083	1
2439	CCR7	-0.515198	6.7257	1
6361	HDAC5	-0.514701	6.36705	1
5097	FAM86B2	-0.514685	6.37122	1
4913	FAM13C	-0.514341	7.16716	0.753906
9955	MIR6165	-0.513515	6.33336	1
13109	RAET1L	-0.513424	6.3466	1
599	ANGPT4	-0.51299	6.37539	1
472	AKT2	-0.512948	6.39879	1
14723	SLC39A5	-0.512914	6.3261	1
17069	TTLL12	-0.512882	6.3734	1
13909	RYR2	-0.511984	6.36512	1
52	ABCB4	-0.511534	6.47731	1
14086	SCPEP1	-0.511406	7.95364	0.442261
33	AATF	-0.511224	6.58926	1
10050	MIR6886	-0.511108	6.46493	1
15365	SPDYE3	-0.51108	6.41874	1
12488	PPP1R27	-0.511078	6.32407	1
12483	PPP1R1B	-0.510883	6.53169	1
6400	HELZ	-0.510664	6.67589	1
9628	MFSD11	-0.510456	6.6218	1
16327	TMC3	-0.510128	6.35548	1
1947	C5orf64	-0.510068	6.31235	1
5518	FSD2	-0.509957	6.35372	1
2633	CDK2AP2	-0.509616	6.54432	1
5923	GNG7	-0.509395	6.37663	1
6345	HCFC1R1	-0.509382	6.95723	1
14641	SLC28A1	-0.509378	6.35333	1
5954	GOLGA6L10	-0.509368	6.34369	1
12896	PTPRD	-0.509357	6.34837	1
4141	DOCK8	-0.508882	6.4837	1
4540	ELSPBP1	-0.508851	6.33108	1
16741	TPM3	-0.50837	8.72917	0.315154
897	ARHGAP39	-0.508366	6.32424	1
12423	PPEF1	-0.508039	6.31989	1
4741	ESRRG	-0.508037	6.4538	1
4905	FAM134C	-0.507919	6.67828	1
12630	PRKCSH	-0.507809	6.71628	1
16998	TSPAN32	-0.507567	6.33005	1
5257	FCRL6	-0.507374	6.32313	1
15622	STAT5B	-0.507117	6.63345	1
16011	TCEAL6	-0.506956	6.32672	1
14444	SIGLEC5	-0.506933	6.32931	1
252	ADAMTS13	-0.506924	6.33375	1
5370	FLII	-0.50685	6.75851	1
250	ADAMTS10	-0.506713	6.36585	1
6535	HLA-DQA1	-0.506561	8.21675	0.443307
216	ACTR3C	-0.506214	6.3644	1
12784	PSMC5	-0.505896	8.17409	0.385967
14876	SMARCB1	-0.505866	6.5336	1
16110	TEX2	-0.505697	6.51476	1
7126	IRF7	-0.505553	6.41273	1
4380	EFCAB12	-0.505474	6.3282	1
15269	SOCS3	-0.505078	7.04472	0.726563
7826	LEPREL2	-0.5047	6.50137	1
14456	SIM2	-0.504598	6.33507	1
10049	MIR6885	-0.504569	6.31006	1
818	APOL6	-0.504322	6.68365	1
14218	2001-09-01	-0.503754	6.34846	1
10351	MS4A1	-0.503677	6.33838	1
9850	MIR4283-1	-0.503567	6.31416	1
9851	MIR4283-2	-0.503567	6.31416	1
12230	PLXDC1	-0.503366	6.54829	1
10685	NAT9	-0.503355	6.44085	1
3025	CLIP2	-0.502885	6.35626	1
13380	RGCC	-0.50277	7.41759	0.607239
5275	FER1L6	-0.502598	6.33511	1
14516	SLC12A9	-0.502247	6.34351	1
12587	PREX1	-0.502182	6.37015	1
202	ACTG1	-0.502104	10.6463	0.558485
15306	SOX9-AS1	-0.501953	6.33647	1
14711	SLC38A5	-0.501748	6.49185	1
1390	BCL2L12	-0.501601	6.38975	1
13857	RSPO3	-0.501544	6.35616	1
15713	STXBP4	-0.501481	6.43251	1
3736	DCAF4	-0.501325	6.40275	1
15961	TBC1D3H	-0.501226	6.33403	1
16585	TMPRSS6	-0.501068	6.33399	1
11836	PELI3	-0.500066	6.35972	1
7163	ITGA3	-0.499936	6.40759	1
16109	TEX14	-0.4999	6.36913	1
9511	MED13	-0.499767	6.51644	1
10224	MPND	-0.499465	6.38416	1
8098	LINC01115	-0.499351	6.31028	1
17281	UCP2	-0.499137	7.11458	0.753906
5970	GOLGA8I	-0.499074	6.33687	1
2498	CD300LF	-0.498992	6.33783	1
16737	TPI1P3	-0.498974	6.31314	1
2066	CACNB1	-0.498965	6.34276	1
17685	WDR88	-0.498689	6.34296	1
3089	CNDP1	-0.498054	6.34087	1
8520	LOC101926987	-0.497929	6.32623	1
13372	RFX4	-0.497914	6.32305	1
15890	TAF6L	-0.497702	6.37636	1
15052	SNORA65	-0.497655	6.3483	1
57	ABCB9	-0.497398	6.33085	1
16875	TRIM53AP	-0.496847	6.32949	1
1044	ASB1	-0.496808	6.37264	1
15548	SSX8	-0.496588	6.32679	1
5235	FCER1A	-0.496396	8.32992	0.551586
7000	IL7R	-0.496298	6.66926	1
14094	SCUBE3	-0.496276	6.35795	1
14561	SLC22A14	-0.496259	6.33753	1
1186	ATP5G1	-0.496142	8.18036	0.38574
15370	SPECC1	-0.495403	6.5628	1
14507	SLC11A1	-0.495351	6.35291	1
8206	LINC01518	-0.494965	6.32037	1
11924	PHACTR2	-0.494956	6.93043	1
9131	LRRN1	-0.494842	6.33318	1
12476	PPP1R14D	-0.494786	6.31743	1
5894	GNA12	-0.494304	6.37058	1
9896	MIR4751	-0.494139	6.46729	1
17091	TUBA8	-0.494073	6.34076	1
1094	ASTN2-AS1	-0.493762	6.32744	1
13233	RBM20	-0.493648	6.34425	1
1172	ATP2A1	-0.49362	6.33107	1
12085	PKD1L2	-0.492863	6.46907	1
5964	GOLGA8CP	-0.492862	6.32749	1
15733	SUGT1P1	-0.492839	6.32599	1
13387	RGN	-0.492457	6.36205	1
15472	SRGAP2-AS1	-0.4924	6.3291	1
11398	OSBP2	-0.492214	6.3198	1
17500	VEPH1	-0.492059	6.38212	1
10542	MYH7	-0.491882	6.33388	1
15080	SNORD104	-0.491651	6.34169	1
8205	LINC01517	-0.491445	6.32388	1
4206	DRICH1	-0.491318	6.32109	1
16789	TRAF6	-0.491014	6.39365	1
10234	MPRIP	-0.49053	6.47006	1
13480	RIPPLY3	-0.490425	6.31568	1
8335	LOC100134317	-0.490344	6.32786	1
13171	RASA4	-0.490199	6.44905	1
8704	LOC101929397	-0.490138	6.32001	1
13406	RGS20	-0.490002	6.31826	1
1595	BTNL8	-0.489755	6.32265	1
11077	NPHP4	-0.489754	6.33757	1
141	ACE	-0.489221	6.34375	1
15151	SNORD49A	-0.489141	6.34177	1
550	ALYREF	-0.489023	6.83803	1
4296	DYRK1B	-0.489018	6.32482	1
196	ACTA1	-0.488974	6.70209	1
4427	EHBP1L1	-0.488699	6.34966	1
13855	RSPH9	-0.488337	6.34382	1
5783	GHRHR	-0.488302	6.31318	1
13693	RPL23A	-0.488137	8.88691	0.511669
1098	ASXL3	-0.487949	6.3283	1
2047	CABP4	-0.487665	6.31573	1
15980	TBL1X	-0.487426	6.52559	1
6132	GRIA3	-0.487383	6.49243	1
883	ARHGAP23	-0.487309	6.39173	1
7622	KNG1	-0.48721	6.32063	1
12959	PYCR1	-0.487004	6.37059	1
16252	TIMM22	-0.486927	6.70495	1
10248	MRC2	-0.486358	6.57339	1
4917	FAM151A	-0.486332	6.33974	1
5582	G6PC3	-0.486138	6.64207	1
4267	DUSP3	-0.486063	6.58233	1
7511	KIF3C	-0.48601	6.38519	1
6951	IL17RA	-0.485837	6.38122	1
16583	TMPRSS4	-0.485657	6.37252	1
8496	LOC101060321	-0.485493	6.33533	1
8497	LOC101060351	-0.485493	6.33533	1
8498	LOC101060376	-0.485493	6.33533	1
8499	LOC101060389	-0.485493	6.33533	1
8759	LOC102723859	-0.485493	6.33533	1
8781	LOC102724862	-0.485493	6.33533	1
15959	TBC1D3C	-0.485493	6.33533	1
15960	TBC1D3F	-0.485493	6.33533	1
4083	DNAJC21	-0.48522	6.74822	1
14500	SLAMF8	-0.484696	6.6507	1
14872	SMARCA4	-0.48458	6.65456	1
14880	SMARCD2	-0.484319	6.56498	1
2215	CBLC	-0.483641	6.35371	1
3337	CRABP1	-0.48349	6.46054	1
12173	PLEKHA6	-0.483431	6.41637	1
5619	GAGE2C	-0.483319	6.32862	1
6272	GYPE	-0.483302	6.31289	1
1342	BASP1	-0.483186	6.56708	1
7098	IQCF1	-0.482954	6.30571	1
9455	MCEMP1	-0.482912	6.31468	1
2291	CCDC157	-0.482788	6.33835	1
3345	CRB2	-0.482589	6.38612	1
2071	CACNG7	-0.482524	6.31693	1
13054	RAB5C	-0.482494	6.49533	1
5135	FARP1	-0.482394	6.58532	1
14180	SEMA3A	-0.48219	6.6955	1
11476	P4HA3	-0.482046	6.32508	1
16290	TLK2	-0.482038	6.4097	1
15254	SNX31	-0.481721	6.35034	1
14232	2009-09-01	-0.481639	6.49697	1
14013	SCAMP5	-0.481434	6.31945	1
10936	NIN	-0.481171	6.71609	1
5376	FLJ26850	-0.480935	6.34108	1
2436	CCR4	-0.480362	6.34349	1
2996	CLEC18C	-0.48021	6.31625	1
10493	MUSK	-0.480183	6.38341	1
15092	SNORD114-12	-0.479964	6.30214	1
7191	ITIH2	-0.479948	6.31916	1
14269	SERPINC1	-0.479721	6.31635	1
13496	RMRP	-0.479626	6.56529	1
2160	CARHSP1	-0.479308	6.74155	1
15492	SRPX	-0.478563	6.77167	1
7491	KIF17	-0.477854	6.36997	1
17387	USH2A	-0.477201	6.34226	1
12778	PSMB9	-0.476683	6.53708	1
16944	TRPV2	-0.47656	6.52264	1
584	ANAPC10	-0.476543	7.03226	0.726563
13960	SAMD9	-0.476469	6.47128	1
6276	GZMA	-0.4758	6.4285	1
13283	RCAN2	-0.475747	6.86787	0.6875
14170	SELE	-0.475727	8.25539	0.442841
15702	STX1B	-0.475617	6.31211	1
6249	GUCY1A3	-0.475551	6.78766	1
10884	NFATC2	-0.475551	6.72133	1
7846	LGALS9B	-0.475347	6.32509	1
803	APOBEC3H	-0.475288	6.34861	1
6919	IGSF5	-0.475022	6.32453	1
15781	SV2B	-0.47485	6.36791	1
3557	CWC25	-0.474831	7.52439	0.629059
9524	MED24	-0.474823	6.45938	1
10189	MOK	-0.474728	6.56446	1
6255	GUCY2F	-0.474413	6.33037	1
1896	C3P1	-0.474317	6.34036	1
3291	CPA6	-0.474133	6.3032	1
12566	PRDM10	-0.473893	6.39124	1
13928	S100B	-0.473867	7.56977	0.62906
15438	SPTA1	-0.473859	6.3409	1
9115	LRRC75A-AS1	-0.473775	9.89194	0.585572
13441	RHOJ	-0.473686	7.01308	0.726563
2381	CCL18	-0.473676	6.56981	1
9827	MIR3679	-0.47352	6.38567	1
5971	GOLGA8J	-0.473426	6.32238	1
9677	MICAL3	-0.473406	6.35844	1
2206	CATSPERG	-0.47335	6.40033	1
4804	EXTL1	-0.473274	6.32475	1
808	APOC2	-0.473231	6.32953	1
810	APOC4-APOC2	-0.473231	6.32953	1
17896	ZBTB49	-0.47313	6.37952	1
11378	OR7E14P	-0.473092	6.3185	1
11142	NRG1	-0.473088	6.3406	1
8135	LINC01234	-0.473072	6.30934	1
17251	UBOX5-AS1	-0.473044	6.3435	1
7837	LGALS2	-0.472908	7.16676	0.753906
4054	DNAI1	-0.472517	6.35575	1
14940	SMPDL3B	-0.472323	6.35964	1
8157	LINC01285	-0.472315	6.33466	1
5020	FAM228A	-0.472021	6.33324	1
6351	HCK	-0.47185	6.44363	1
1093	ASTN2	-0.471584	6.42808	1
2231	CBX5	-0.47146	7.40059	0.790527
5713	GCKR	-0.471437	6.33192	1
15797	SYCE1L	-0.471346	6.48908	1
13026	RAB31	-0.47118	6.82497	1
17590	VWCE	-0.471096	6.35365	1
9913	MIR515-1	-0.470866	6.30858	1
9914	MIR515-2	-0.470866	6.30858	1
1022	ARRDC5	-0.470565	6.32101	1
10430	MTG2	-0.470439	6.3501	1
9784	MIR302C	-0.470415	6.30681	1
12417	PPARGC1B	-0.470412	6.38344	1
16938	TRPM6	-0.470396	6.38057	1
2821	CHAF1B	-0.470125	6.40238	1
3157	COG1	-0.469775	6.68379	1
101	ABI3	-0.469768	6.335	1
13465	RIMS2	-0.469487	6.33265	1
8899	LOC440434	-0.469461	6.46967	1
10889	NFE2L1	-0.469405	6.59913	1
17829	YPEL2	-0.469341	6.49706	1
8189	LINC01476	-0.469239	6.3265	1
15163	SNORD56B	-0.469072	6.31869	1
17584	VWA3A	-0.468886	6.34922	1
12025	PIK3AP1	-0.468812	6.39413	1
5493	FRMD1	-0.468718	6.33079	1
8990	LOC731424	-0.4686	6.32526	1
11570	PARK2	-0.468342	6.3436	1
12061	PIPOX	-0.467925	6.32939	1
3148	COA3	-0.467918	8.07034	0.460492
5618	GAGE12I	-0.467865	6.32777	1
6984	IL2RG	-0.467563	7.20022	0.753906
3749	DCDC2B	-0.467452	6.39376	1
8001	LINC00671	-0.467446	6.33828	1
16770	TPTE2P5	-0.467415	6.48227	1
10987	NME1-NME2	-0.467408	7.69944	0.503447
8117	LINC01158	-0.467359	6.31801	1
11477	P4HB	-0.467336	6.85353	1
3577	CXCL8	-0.467303	8.43823	0.48805
10551	MYL3	-0.467202	6.50543	1
13945	SAFB2	-0.46702	6.64677	1
10577	MYO1F	-0.466699	6.4518	1
3633	CYP24A1	-0.466445	6.32373	1
17799	XYLB	-0.46641	6.39008	1
13502	RNASEH1-AS1	-0.466264	6.38165	1
2763	CEP95	-0.465692	6.74553	1
1694	C15orf26	-0.465646	6.3181	1
16168	TGM3	-0.46557	6.32559	1
11635	PCDH11X	-0.465537	6.3275	1
17185	UBALD2	-0.465341	6.40106	1
770	APBB2	-0.465213	6.60188	1
9251	MAF1	-0.465155	6.43648	1
3638	CYP2B6	-0.464987	6.33331	1
8512	LOC101926935	-0.46489	6.31451	1
15621	STAT5A	-0.464638	6.61321	1
10349	MRVI1	-0.464274	6.63229	1
11045	NOS2	-0.464234	6.30757	1
4993	FAM20A	-0.464211	6.42293	1
17430	USP46	-0.46406	6.3899	1
15503	SRSF2	-0.464047	7.24807	0.774414
10283	MRPL28	-0.463958	6.44633	1
4205	DRGX	-0.463925	6.31457	1
6121	GRB7	-0.463835	6.37722	1
8800	LOC151475	-0.46382	6.32325	1
17690	WDR93	-0.463289	6.34262	1
9918	MIR548A2	-0.462557	6.31839	1
8227	LLGL1	-0.461903	6.32507	1
14717	SLC39A11	-0.461841	6.90999	1
11231	NUDT18	-0.461834	6.361	1
8421	LOC100506476	-0.461823	6.33434	1
16525	TMEM53	-0.461796	6.34535	1
7242	JMJD4	-0.461744	6.43651	1
162	ACOT7	-0.461712	6.69506	1
11455	OXLD1	-0.461708	6.31056	1
5237	FCER2	-0.461661	6.33081	1
3075	CMSS1	-0.46125	7.41984	0.790527
351	AFF2	-0.461235	6.35955	1
17334	UNC13D	-0.460793	6.33606	1
2407	CCNB3	-0.460707	6.31392	1
6116	GRAPL	-0.46063	6.34263	1
2046	CABP1	-0.460351	6.35435	1
2105	CAMK2A	-0.460172	6.33143	1
4733	ESPL1	-0.460165	6.36454	1
16662	TNR	-0.459995	6.33678	1
7971	LINC00535	-0.459844	6.32692	1
8201	LINC01505	-0.459601	6.30966	1
4046	DNAH17-AS1	-0.459005	6.32764	1
9506	MED1	-0.458935	6.73649	1
16709	TOX	-0.458815	6.58033	1
12015	PIGS	-0.458744	6.65284	1
14320	SFI1	-0.458727	6.38364	1
8708	LOC101929486	-0.458588	6.34042	1
7046	INPP4A	-0.458549	6.42138	1
8815	LOC283575	-0.458431	6.34759	1
4769	EVI2A	-0.458269	6.51038	1
9969	MIR6501	-0.458244	6.35221	1
7313	KCNH6	-0.458115	6.32487	1
8844	LOC285768	-0.458048	6.32047	1
2363	CCDC88C	-0.457982	6.38014	1
15762	SUPT6H	-0.457887	6.96813	1
10204	MORN5	-0.457756	6.33182	1
13837	RRP8	-0.457714	6.47221	1
8626	LOC101928205	-0.457617	6.31451	1
12310	POLD1	-0.457611	6.33527	1
18252	ZNF429	-0.457484	6.73894	1
8080	LINC01012	-0.457226	6.33971	1
15019	SNORA21	-0.45719	6.55304	1
11508	PAGE1	-0.45696	6.31757	1
10678	NARR	-0.456945	6.43689	1
382	AGO2	-0.456797	6.42826	1
3435	CSNK1D	-0.45678	6.51327	1
13980	SARS2	-0.456626	6.41781	1
14750	SLC4A10	-0.456531	6.32899	1
14046	SCG5	-0.456506	6.40032	1
5071	FAM71D	-0.456445	6.31636	1
3303	CPM	-0.456431	7.28018	0.774414
9386	2010-03-01	-0.45629	6.34353	1
18015	ZFYVE9	-0.456198	6.43966	1
2813	CGREF1	-0.456167	6.3652	1
2375	CCL13	-0.455961	7.93328	0.557239
15800	SYCP1	-0.455865	6.32415	1
5919	GNG12-AS1	-0.455848	6.51476	1
12858	PTK2	-0.45583	7.0445	0.726563
18339	ZNF560	-0.455695	6.30877	1
12720	PRRT2	-0.455423	6.34555	1
959	ARL17B	-0.455288	6.44072	1
6932	IKZF3	-0.455277	6.36175	1
966	ARL4D	-0.454813	6.86679	1
4758	ETV3	-0.454265	6.70545	1
7836	LGALS12	-0.454237	6.31949	1
7317	KCNIP3	-0.45394	6.33657	1
5601	GABRB1	-0.453691	6.32353	1
2290	CCDC155	-0.453681	6.34506	1
8590	LOC101927701	-0.453503	6.29923	1
17501	VEZF1	-0.453262	6.66644	1
6263	GUSBP3	-0.453235	6.44531	1
1615	C10orf128	-0.453218	6.88654	1
745	AP2B1	-0.452824	6.88408	1
12793	PSMD3	-0.45262	6.4901	1
2992	CLEC16A	-0.452487	6.40085	1
4548	EMC3-AS1	-0.452474	6.36849	1
3829	DDX49	-0.452256	6.45288	1
7446	KIAA1210	-0.452174	6.32928	1
2111	CAMKK1	-0.45214	6.36617	1
10314	MRPL9	-0.452081	6.60562	1
4694	ERG	-0.451941	6.9248	1
4174	DPP10	-0.451857	6.32162	1
7205	ITPKB-IT1	-0.451848	6.37723	1
12804	PSME3	-0.451684	6.51003	1
1720	C16orf91	-0.45124	6.36066	1
6908	IGFN1	-0.451236	6.32456	1
356	AFMID	-0.451224	7.13774	0.753906
15734	SUGT1P3	-0.451208	6.46595	1
10484	MUC19	-0.45119	6.34335	1
8971	LOC728730	-0.451146	6.3486	1
10590	MYOCD	-0.451014	6.41936	1
5166	FBN3	-0.450999	6.38008	1
8483	LOC100996291	-0.450979	6.31913	1
17415	USP32P1	-0.450946	6.42208	1
3553	CUX2	-0.450927	6.32652	1
5534	FTX	-0.450676	6.63437	1
15249	SNX29	-0.450336	6.57013	1
10713	NCAM2	-0.450251	6.40598	1
5672	GAS6-AS2	-0.450042	6.36782	1
6979	IL23R	-0.450026	6.32742	1
529	ALMS1	-0.450019	6.44614	1
10568	MYO16	-0.44999	6.337	1
6428	HEXDC	-0.449608	6.34077	1
3193	COL5A1	-0.449423	6.78649	1
15368	SPDYE7P	-0.449376	6.32937	1
10432	MTHFD1L	-0.449364	6.39703	1
17853	ZAN	-0.449274	6.35263	1
5236	FCER1G	-0.449133	8.77298	0.461093
10230	MPP6	-0.449095	6.7035	1
4921	FAM153C	-0.449012	6.32863	1
781	APH1B	-0.448906	6.57215	1
18193	ZNF326	-0.448739	6.579	1
6452	HID1-AS1	-0.448478	6.32861	1
3527	CTSH	-0.448412	7.03171	0.726563
7287	KAZALD1	-0.4483	6.41848	1
7668	KRT40	-0.448199	6.32668	1
1801	C1orf127	-0.448092	6.30864	1
11364	OR10V1	-0.448072	6.30516	1
6108	GRAMD1A	-0.448068	6.34768	1
6355	HCST	-0.447971	6.86388	1
9855	MIR4314	-0.447934	6.32901	1
16138	TFEB	-0.44792	6.3782	1
8190	LINC01481	-0.447819	6.51041	1
2080	CADM4	-0.447611	6.32616	1
3744	DCAKD	-0.447601	6.66745	1
884	ARHGAP24	-0.447535	6.61611	1
7728	LAMA4	-0.447421	7.421	0.790527
18037	ZMAT4	-0.44737	6.32912	1
7860	LHFPL3-AS2	-0.447102	6.32017	1
12755	PSG6	-0.446962	6.34002	1
61	ABCC12	-0.446949	6.3079	1
2538	CD84	-0.446729	6.49251	1
8672	LOC101928869	-0.446599	6.32347	1
5897	GNA14-AS1	-0.446455	6.3326	1
16772	TPTEP1	-0.446204	6.36547	1
9204	LYPD3	-0.446008	7.79016	0.663625
5338	FILIP1L	-0.44595	7.38347	0.790527
11769	PDE9A	-0.445934	6.50782	1
8411	LOC100506178	-0.445788	6.37364	1
14567	SLC22A20	-0.445694	6.3223	1
16913	TRMT2B	-0.445652	6.44334	1
14322	SFMBT2	-0.445595	6.34492	1
8980	LOC729732	-0.445536	6.39635	1
17666	WDR62	-0.445294	6.34492	1
10004	MIR6775	-0.445095	6.3076	1
13415	RGSL1	-0.445003	6.34335	1
5620	GAGE4	-0.444858	6.32653	1
5621	GAGE5	-0.444858	6.32653	1
5622	GAGE7	-0.444858	6.32653	1
8796	LOC146880	-0.444738	7.33168	0.581055
3830	DDX5	-0.444644	10.7345	0.63001
1436	BFSP2	-0.444539	6.31954	1
6277	GZMB	-0.444214	6.36258	1
16399	TMEM150C	-0.444014	6.67324	1
7471	KIAA1656	-0.443966	6.31109	1
16491	TMEM255B	-0.443918	6.36328	1
2088	CALCOCO2	-0.443709	8.0012	0.442784
8524	LOC101927043	-0.443471	6.35027	1
6645	HOXB-AS1	-0.443245	6.38776	1
10690	NAV3	-0.443193	6.42895	1
2603	CDH20	-0.443149	6.32463	1
3196	COL6A1	-0.443135	7.70195	0.503447
3141	CNTNAP3B	-0.442806	6.34574	1
3142	CNTNAP3P2	-0.442806	6.34574	1
15328	SPAG8	-0.442582	6.88963	1
8569	LOC101927502	-0.442435	6.31967	1
6393	HECW1	-0.442421	6.33206	1
3813	DDX24	-0.442364	8.96655	0.491296
439	AKAP1	-0.44227	6.6339	1
11105	NPTXR	-0.442187	6.31201	1
8037	LINC00891	-0.44217	6.38604	1
8325	LOC100132741	-0.44217	6.38604	1
2704	CELF6	-0.44216	6.34585	1
5015	FAM222B	-0.441972	6.36031	1
12104	PKN3	-0.441466	6.35837	1
8881	LOC400685	-0.441414	6.34932	1
2246	CCDC102B	-0.441408	6.72398	1
5959	GOLGA6L9	-0.441299	6.33399	1
2739	CEP164	-0.441253	6.56866	1
10860	NELL1	-0.441194	6.33024	1
7267	KANSL1	-0.441193	6.44172	1
916	ARHGEF17	-0.440861	6.42898	1
16666	TNRC6C	-0.440606	6.43203	1
10401	MT1JP	-0.440358	6.39057	1
4149	DOK5	-0.440302	6.37122	1
7606	KLRC3	-0.440257	6.33514	1
12179	PLEKHD1	-0.440143	6.31729	1
3371	CRISP1	-0.439778	6.31345	1
14782	SLC6A4	-0.439747	6.37599	1
2289	CCDC153	-0.439524	6.37452	1
7881	LILRB3	-0.438838	6.37496	1
14405	SHANK3	-0.438828	6.34143	1
14512	SLC12A4	-0.438678	6.45324	1
17074	TTLL6	-0.438521	6.32206	1
7925	LINC00265	-0.438404	6.38147	1
5770	GGNBP2	-0.438133	7.03066	0.726563
841	AQP8	-0.4381	6.33986	1
8479	LOC100862671	-0.437842	6.59241	1
1404	BCO1	-0.43777	6.34269	1
13425	RHCE	-0.437625	6.44476	1
628	ANKRD13B	-0.437345	6.3185	1
16872	TRIM50	-0.437203	6.31203	1
2720	CENPK	-0.436731	6.47469	1
1840	C20orf173	-0.436679	6.32771	1
18008	ZFYVE16	-0.436596	6.85032	1
14718	SLC39A12	-0.43649	6.31779	1
11545	PAPL	-0.436452	6.33552	1
4569	EMP3	-0.436414	6.57036	1
15329	SPAG9	-0.436362	6.87457	1
5201	FBXO3-AS1	-0.436056	6.30303	1
15025	SNORA31	-0.435958	6.54424	1
10900	NFKB2	-0.435906	6.41097	1
13664	RPGRIP1	-0.435904	6.35382	1
2906	CHSY1	-0.435881	6.83128	1
15804	SYDE1	-0.43561	6.36736	1
16502	TMEM31	-0.435512	6.32501	1
9235	MAATS1	-0.435271	6.399	1
4276	DVL2	-0.43503	6.39954	1
13036	RAB3B	-0.435004	6.33266	1
6006	GPATCH2	-0.43478	6.6953	1
14756	SLC4A5	-0.434719	6.39934	1
5867	GLTSCR2	-0.434628	6.55528	1
18537	ZNF830	-0.434625	6.73172	1
3421	CSF2RB	-0.434475	6.38888	1
8477	LOC100652824	-0.434415	6.34628	1
12326	POLM	-0.434246	6.3981	1
532	ALOX12B	-0.434236	6.34862	1
17965	ZDHHC8P1	-0.434128	6.31862	1
15820	SYNGR2	-0.434119	6.51149	1
14454	SIL1	-0.433825	6.5822	1
1776	C1QTNF1	-0.433776	6.47476	1
12914	PTRH1	-0.433746	6.36469	1
13358	RFPL2	-0.433604	6.31616	1
9293	MAMSTR	-0.433494	6.35234	1
16783	TRAF3IP1	-0.433377	6.5236	1
12600	PRICKLE4	-0.433258	6.33524	1
18412	ZNF652	-0.433253	6.83417	1
18070	ZNF135	-0.433212	6.4326	1
10245	MRAP2	-0.433195	6.32509	1
14421	SHKBP1	-0.433104	6.37092	1
8125	LINC01198	-0.433047	6.4283	1
5064	FAM65A	-0.432955	6.60783	1
8085	LINC01028	-0.432492	6.31207	1
16655	TNNI3K	-0.432257	6.42514	1
8621	LOC101928107	-0.43213	6.31631	1
9597	METTL2A	-0.431614	6.66744	1
11925	PHACTR3	-0.43157	6.35136	1
2708	CELSR3-AS1	-0.431372	6.36728	1
12424	PPEF2	-0.431271	6.32839	1
4135	DOCK3	-0.431223	6.32902	1
15749	SUMO2	-0.430965	8.51047	0.476681
498	ALDH8A1	-0.430929	6.31935	1
10210	MOXD1	-0.430915	6.45001	1
5786	GID4	-0.430903	6.36586	1
12903	PTPRK	-0.430792	6.69516	1
9968	MIR650	-0.430463	6.5835	1
12271	PNLIP	-0.430386	6.33611	1
13944	SAFB	-0.43032	6.47999	1
11801	PDPN	-0.430312	6.54873	1
3869	DENND5B-AS1	-0.430147	6.32303	1
15110	SNORD121A	-0.429987	6.31884	1
9393	2009-03-01	-0.429985	6.36313	1
15949	TBC1D22A	-0.429926	6.36636	1
3645	CYP2G1P	-0.429709	6.33473	1
4806	EXTL3	-0.429619	6.39182	1
3124	CNPY4	-0.429284	6.68691	1
6154	GRK7	-0.428973	6.31957	1
8870	LOC389641	-0.428935	6.348	1
1065	ASGR2	-0.42885	6.34756	1
15863	TACO1	-0.428829	6.39041	1
9689	MIEN1	-0.428767	6.54974	1
2253	CCDC110	-0.428733	6.3698	1
16071	TEAD4	-0.428554	6.32365	1
695	ANO4	-0.428527	6.32125	1
7849	LGI1	-0.428296	6.36057	1
17036	TTC23L	-0.428261	6.34338	1
554	AMBRA1	-0.428071	6.40745	1
14652	SLC2A13	-0.427665	6.34181	1
8146	LINC01265	-0.427505	6.32311	1
3740	DCAF7	-0.427404	6.58316	1
13611	RNU6-2	-0.427278	6.68091	1
16040	TCP10L2	-0.427219	6.32114	1
8385	LOC100505718	-0.427118	6.31261	1
827	APPL1	-0.427102	6.68042	1
9582	METTL11B	-0.426878	6.31343	1
12078	PIWIL2	-0.426765	6.35987	1
826	APPBP2	-0.426674	6.4739	1
6549	HLF	-0.426632	6.46235	1
582	AMZ2P1	-0.426528	6.91736	1
2696	CELA2A	-0.426476	6.36115	1
10385	MSS51	-0.426436	6.34755	1
17763	XCR1	-0.426412	6.31985	1
14538	SLC16A5	-0.426161	6.42663	1
528	ALLC	-0.426108	6.31412	1
16648	TNKS2-AS1	-0.425822	6.33872	1
12901	PTPRH	-0.425503	6.34014	1
8358	LOC100288866	-0.425477	6.31428	1
5251	FCHSD1	-0.425417	6.36358	1
2545	CD97	-0.425276	6.84251	1
11104	NPTX2	-0.425225	6.48756	1
4500	ELAC2	-0.425211	6.41762	1
16738	TPK1	-0.425056	6.45144	1
11235	NUDT22	-0.424866	6.46377	1
10153	MMP23A	-0.424667	6.41767	1
12228	PLTP	-0.424441	7.62521	0.647607
2171	CASC21	-0.424365	6.32219	1
4820	F12	-0.424223	6.30533	1
359	AGAP1	-0.424117	6.45535	1
8658	LOC101928682	-0.424094	6.3286	1
14986	SNF8	-0.424069	6.50798	1
12861	PTK7	-0.424046	6.58089	1
7647	KRT12	-0.423772	6.31067	1
3205	COL9A1	-0.423712	6.32477	1
9785	MIR3064	-0.423698	8.51995	0.538229
4623	EP400NL	-0.423638	6.3471	1
9832	MIR371B	-0.423636	6.32022	1
668	ANKRD42	-0.423121	6.54519	1
17343	UNC93B1	-0.422889	6.32931	1
17914	ZC3H13	-0.422732	7.6556	0.647607
7876	LILRA4	-0.422648	6.31593	1
9344	MAP3K9	-0.42256	6.31943	1
8930	LOC643733	-0.422388	7.04887	0.726563
4595	ENOX1	-0.422271	6.37002	1
10453	MTMR8	-0.422112	6.37874	1
3106	CNNM2	-0.422088	6.3687	1
12531	PPP5D1	-0.421805	6.37399	1
4641	EPHA1-AS1	-0.421758	6.33665	1
18285	ZNF486	-0.421728	6.46236	1
7383	KDM4A-AS1	-0.421423	6.59891	1
4323	EBI3	-0.421411	6.35091	1
7493	KIF19	-0.421238	6.33099	1
5774	GGT5	-0.421229	6.6142	1
12568	PRDM14	-0.421157	6.31476	1
1411	BCYRN1	-0.420897	6.32616	1
12891	PTPN9	-0.420734	6.55222	1
15831	SYNRG	-0.420704	6.42715	1
13809	RPUSD3	-0.420357	6.46594	1
13617	RNU6-83P	-0.420317	6.36421	1
2695	CELA1	-0.420254	6.34596	1
8377	LOC100499484	-0.420135	6.36041	1
12213	PLLP	-0.420094	6.39515	1
9909	MIR5047	-0.41972	7.58874	0.62906
5459	FOXI3	-0.419606	6.31847	1
9831	MIR371A	-0.419465	6.32013	1
4838	FABP6	-0.419401	6.33902	1
9818	MIR3650	-0.419234	6.3103	1
14309	SEZ6L2	-0.419146	6.32743	1
1372	BCAS3	-0.41895	6.50287	1
13618	RNU6ATAC	-0.41884	6.31002	1
287	ADCY10	-0.418792	6.3447	1
8730	LOC101929983	-0.418706	6.33925	1
8341	LOC100268168	-0.418589	6.34319	1
7243	JMJD6	-0.418573	6.82426	1
16642	TNIP3	-0.41856	6.32254	1
8784	LOC102724933	-0.418445	6.31014	1
1652	C11orf85	-0.418275	6.3104	1
12752	PSG3	-0.418262	6.33579	1
16404	TMEM161A	-0.418231	6.33391	1
11405	OSBPL5	-0.418228	6.34705	1
15241	SNX19	-0.41816	6.50045	1
12185	PLEKHG4B	-0.417988	6.3538	1
16781	TRAF2	-0.41793	6.34593	1
3367	CRIP1	-0.417862	7.7729	0.523469
1050	ASB2	-0.417748	6.33538	1
7741	LAMP5	-0.417649	6.39513	1
6278	GZMH	-0.417442	6.3467	1
15386	SPI1	-0.417337	6.31311	1
17624	WDFY4	-0.417099	6.44938	1
762	AP5S1	-0.416885	6.43873	1
6611	HNRNPLL	-0.416689	6.56363	1
5790	GIGYF2	-0.416549	7.13897	0.753906
17525	VNN1	-0.416381	6.3485	1
12316	POLE	-0.415875	6.37854	1
8752	LOC102723631	-0.415813	6.33206	1
1230	ATP8B3	-0.415588	6.32134	1
1307	B9D2	-0.415485	6.34378	1
14369	SH2D1A	-0.415483	6.41297	1
8629	LOC101928248	-0.415437	6.41789	1
14217	SEPSECS-AS1	-0.415327	6.38282	1
7323	KCNJ2	-0.415088	6.47874	1
13484	RLBP1	-0.415084	6.33109	1
1521	BPIFB4	-0.415059	6.32402	1
2009	C9orf16	-0.415059	6.42687	1
13275	RBPJL	-0.414958	6.31152	1
9829	MIR3687-1	-0.4149	6.47994	1
4103	DNALI1	-0.414658	6.52005	1
10593	MYOM2	-0.414618	6.37566	1
3876	DEPDC5	-0.41439	6.48015	1
12907	PTPRQ	-0.413969	6.31623	1
264	ADAMTS8	-0.413558	6.34331	1
1761	C19orf54	-0.413427	6.3929	1
5392	FLJ43681	-0.413383	6.32914	1
3177	COL22A1	-0.413273	6.33899	1
9988	MIR6736	-0.413162	6.31875	1
13942	SACS	-0.413143	6.366	1
14995	SNHG20	-0.413086	6.36302	1
18306	ZNF517	-0.413073	6.3125	1
14360	SGSH	-0.413015	6.34345	1
18146	ZNF257	-0.41294	6.37728	1
731	AOC3	-0.412918	6.46996	1
6155	GRM1	-0.412888	6.31804	1
11831	PEG10	-0.412617	6.38593	1
11037	NOP14-AS1	-0.412522	6.4259	1
10753	NCR1	-0.412459	6.30856	1
6187	GSTA1	-0.412431	6.31286	1
6070	GPR33	-0.412405	6.32371	1
11866	PF4	-0.412388	6.32096	1
667	ANKRD40	-0.412376	7.01744	0.726563
2120	CAMTA2	-0.412159	6.36231	1
4283	DYNC1I2	-0.412089	7.38489	0.790527
17221	UBE2O	-0.411982	6.3665	1
8814	LOC283335	-0.411977	6.96448	1
9932	MIR548Q	-0.411685	6.37442	1
17744	WT1	-0.411664	6.33723	1
9384	2002-03-01	-0.411519	6.40322	1
849	ARAP3	-0.411456	6.40328	1
4184	DPY19L1P1	-0.411284	6.39951	1
13531	RNF135	-0.411157	6.45454	1
556	AMDHD1	-0.41112	6.32386	1
1560	BSN	-0.411031	6.32627	1
10655	NALCN	-0.410117	6.35157	1
6451	HID1	-0.409797	6.34932	1
7945	LINC00366	-0.409633	6.32036	1
10990	NME4	-0.4096	6.66863	1
10040	MIR6868	-0.409338	6.40931	1
15356	SPCS2	-0.408985	7.72292	0.663625
17499	VENTX	-0.408843	6.30385	1
9059	LRP4	-0.408728	6.50053	1
17748	WWC1	-0.40867	6.42458	1
11030	NOM1	-0.408579	6.37194	1
12552	PRAMEF15	-0.408403	6.3377	1
7278	KAT6B	-0.408299	6.86699	1
6940	IL12A-AS1	-0.40792	6.3267	1
14708	SLC38A11	-0.407884	6.32028	1
15832	SYP	-0.407857	6.33431	1
347	AFAP1	-0.407623	6.40207	1
7114	IRAK2	-0.407597	6.40191	1
3125	CNR1	-0.407584	6.3475	1
47	ABCA8	-0.407572	6.96809	1
4647	EPHA6	-0.407476	6.32335	1
7767	LARS2-AS1	-0.40745	6.31364	1
957	ARL16	-0.407229	6.71273	1
15541	SSX1	-0.407003	6.32311	1
4358	EDN3	-0.406983	6.37858	1
16657	TNNT2	-0.406824	6.39298	1
9920	MIR548AC	-0.406814	6.31552	1
6117	GRASP	-0.406051	6.37285	1
8703	LOC101929395	-0.40604	6.30503	1
5276	FERMT1	-0.406007	6.34293	1
3976	DIS3L	-0.405847	6.88043	1
7097	IQCE	-0.405826	6.33782	1
2034	CA5B	-0.405791	6.97989	1
18211	ZNF350	-0.405298	6.64183	1
14679	SLC35B1	-0.405245	6.72722	1
5732	GDF3	-0.405052	6.30971	1
2117	CAMSAP2	-0.405014	6.65674	1
15369	SPDYE8P	-0.404995	6.39503	1
67	ABCC6P1	-0.404644	6.32277	1
17687	WDR90	-0.40464	6.40622	1
15066	SNORA77	-0.404575	6.45046	1
7912	LINC00116	-0.40448	6.40421	1
12319	POLE4	-0.404476	6.71585	1
17755	WWTR1-AS1	-0.404472	6.32632	1
3287	CPA1	-0.404409	6.31759	1
2976	CLDN15	-0.404247	6.34267	1
3696	DAGLA	-0.403913	6.32174	1
9330	MAP3K11	-0.403829	6.37712	1
10532	MYH1	-0.403809	6.33488	1
2076	CADM1	-0.403569	6.51001	1
12329	POLR1A	-0.403481	6.42765	1
16313	TM6SF2	-0.403471	6.33162	1
4708	ERICH6-AS1	-0.403111	6.39836	1
303	ADH1A	-0.403081	7.08752	1
8173	LINC01372	-0.402884	6.33041	1
12992	R3HDML	-0.40285	6.31133	1
6143	GRIN2C	-0.402748	6.31595	1
3997	DLEU7	-0.402714	6.31128	1
15500	SRSF10	-0.402696	6.71407	1
14762	SLC51B	-0.402645	6.35461	1
10751	NCOR1P1	-0.402598	6.33146	1
15362	SPDYE1	-0.402586	6.3912	1
2385	CCL21	-0.402571	9.91613	0.546881
16074	TECPR2	-0.402553	6.33896	1
12493	PPP1R36	-0.4025	6.42343	1
448	AKAP7	-0.402327	6.44005	1
14526	SLC15A3	-0.402256	6.59518	1
10569	MYO18A	-0.402133	6.59988	1
3916	DHDH	-0.401895	6.35864	1
7004	ILF3	-0.401886	6.7925	1
17426	USP42	-0.401882	6.45088	1
18246	ZNF419	-0.401762	6.34265	1
9113	LRRC74A	-0.401598	6.33879	1
15677	STRADA	-0.401014	6.69833	1
11340	OIT3	-0.400757	6.34345	1
664	ANKRD36BP2	-0.40072	6.40347	1
2918	CIB2	-0.400607	6.35955	1
17327	UMODL1	-0.400235	6.35677	1
1838	C1orf87	-0.400011	6.34061	1
7332	KCNMB1	-0.400005	7.00573	1
7607	KLRC4	-0.399781	6.32269	1
11299	OAS2	-0.399719	6.485	1
6917	IGSF22	-0.399331	6.35254	1
18222	ZNF382	-0.399313	6.35233	1
10760	NDE1	-0.399122	6.63709	1
10091	MIRLET7G	-0.399053	6.31738	1
16931	TRPC6	-0.398845	6.41185	1
48	ABCA9	-0.398841	6.54093	1
11690	PCGF2	-0.398677	6.54298	1
2207	CAV1	-0.398645	10.169	0.47997
13466	RIMS3	-0.398644	6.3128	1
14138	SEC14L4	-0.398596	6.35501	1
10129	MLLT6	-0.398478	6.88746	1
7648	KRT13	-0.398472	6.33142	1
9540	MEF2B	-0.398326	6.32111	1
5640	GALNT18	-0.398229	6.48684	1
1305	B4GALT7	-0.398224	6.39101	1
1757	C19orf47	-0.398186	6.3318	1
10254	MRGPRF	-0.398104	6.37833	1
747	AP2S1	-0.398049	6.87469	1
12084	PKD1L1	-0.39798	6.34832	1
10359	MS4A7	-0.397976	7.30163	0.774414
7171	ITGAD	-0.39786	6.36063	1
559	AMHR2	-0.397728	6.34318	1
13482	RIT2	-0.397676	6.31618	1
9579	METRNL	-0.397578	6.35474	1
14445	SIGLEC6	-0.397379	6.33749	1
14483	SKAP1	-0.397371	6.38211	1
5224	FBXW10	-0.397338	6.37491	1
2427	CCNT2-AS1	-0.397332	6.34665	1
5883	GMEB2	-0.397322	6.32832	1
4944	FAM169A	-0.397185	6.32307	1
7649	KRT14	-0.396982	8.55033	0.718395
8352	LOC100288152	-0.3968	6.33625	1
1673	C12orf76	-0.396793	6.36432	1
2468	CD177	-0.396774	6.30808	1
11616	PBX4	-0.396743	6.37048	1
16363	TMEM11	-0.396555	6.87669	1
16069	TEAD2	-0.396476	6.51771	1
6866	IFNL1	-0.396427	6.31947	1
11882	PFN4	-0.396105	6.32604	1
14828	SLFN12	-0.396075	6.49091	1
16963	TSEN54	-0.395768	6.34789	1
10437	MTHFS	-0.395389	6.43214	1
13443	RHOT1	-0.395056	6.51088	1
6241	GTPBP6	-0.394836	6.36241	1
3071	CMIP	-0.394796	6.40961	1
1585	BTK	-0.394613	6.59503	1
10187	MOGAT3	-0.394436	6.32058	1
11218	NUDC	-0.394358	6.64138	1
10264	MROH9	-0.394241	6.31693	1
6157	GRM5	-0.394161	6.31516	1
1108	ATCAY	-0.394138	6.32471	1
3054	CLTC	-0.394095	7.23657	1
15471	SRGAP2	-0.394073	6.56948	1
13291	RCE1	-0.393999	6.3513	1
10482	MUC16	-0.393982	6.36462	1
1997	C8orf86	-0.393687	6.33307	1
6980	IL24	-0.393554	6.31782	1
2203	CATSPER3	-0.393481	6.34922	1
16228	TIAF1	-0.393414	6.51944	1
16626	TNFRSF25	-0.393073	6.33025	1
4038	DNAAF2	-0.392895	6.3642	1
16824	TREML3P	-0.39254	6.31729	1
7436	KIAA0930	-0.392422	6.55561	1
5399	FLOT2	-0.392418	6.92043	1
10181	MOBP	-0.392371	6.311	1
4609	ENTPD1-AS1	-0.39234	6.69719	1
8875	LOC392232	-0.392334	6.31125	1
15250	SNX29P1	-0.39179	6.37188	1
10041	MIR6869	-0.391788	6.31883	1
8380	LOC100505592	-0.391708	6.34988	1
8656	LOC101928663	-0.391663	6.31129	1
456	AKNAD1	-0.391462	6.38611	1
11078	NPHS1	-0.391462	6.334	1
17603	WASH2P	-0.391447	6.38039	1
1370	BCAS1	-0.391423	6.42432	1
14027	SCARNA16	-0.391305	6.3183	1
1736	C17orf89	-0.391099	6.43135	1
9929	MIR548G	-0.390987	6.33578	1
4037	DNAAF1	-0.390952	6.34652	1
4674	ERAL1	-0.390917	7.33329	0.774414
2200	CATSPER1	-0.390885	6.33899	1
11284	NVL	-0.390847	6.67246	1
8631	LOC101928269	-0.39083	6.34701	1
3012	CLEC7A	-0.3905	6.583	1
3676	CYTH1	-0.390258	6.4859	1
18355	ZNF573	-0.390224	6.48773	1
15463	SRD5A3-AS1	-0.390138	6.33103	1
15147	SNORD45B	-0.390124	6.32602	1
13357	RFPL1	-0.38998	6.3246	1
7702	KU-MEL-3	-0.389822	6.34029	1
11888	PGAM2	-0.389815	6.35361	1
5427	FN3KRP	-0.389769	6.43995	1
15703	STX2	-0.38965	6.57751	1
6619	HOGA1	-0.389484	6.32232	1
18526	ZNF814	-0.389438	6.47408	1
17567	VSIG10L	-0.389419	6.41423	1
17887	ZBTB40	-0.389316	6.47976	1
4132	DOCK10	-0.389291	6.54412	1
17740	WSB1	-0.389001	7.68758	0.647608
15946	TBC1D2	-0.388774	6.33563	1
15059	SNORA70F	-0.388694	6.4279	1
11951	PHF8	-0.38864	6.45093	1
8581	LOC101927631	-0.388616	6.31322	1
6894	IGF2R	-0.388572	6.45387	1
18099	ZNF19	-0.388521	6.35968	1
6777	HTRA3	-0.388334	6.45743	1
4604	ENPP6	-0.388333	6.33137	1
3042	CLP1	-0.38823	6.58946	1
8024	LINC00854	-0.387015	6.38936	1
18333	ZNF555	-0.386952	6.36465	1
7173	ITGAL	-0.386854	6.39297	1
16276	TK1	-0.386759	6.3726	1
2917	CIB1	-0.386629	6.62058	1
2647	CDKL3	-0.386506	6.44075	1
1569	BTBD16	-0.386411	6.33766	1
4137	DOCK4-AS1	-0.386292	6.31428	1
17514	VIPR2	-0.386097	6.30068	1
11828	PECAM1	-0.386049	7.3696	0.790527
2395	CCL4	-0.385989	7.61118	0.652626
6780	HTT-AS	-0.385843	6.31684	1
8586	LOC101927667	-0.385802	6.31878	1
8510	LOC101926926	-0.385767	6.32139	1
18095	ZNF182	-0.385752	6.40241	1
6800	IBA57-AS1	-0.385647	6.34732	1
17539	VPS25	-0.385382	7.1825	0.753906
13739	RPLP2	-0.385366	10.6092	0.630128
5470	FOXO3B	-0.385347	6.37383	1
13624	ROBO2	-0.38514	6.67045	1
4715	ERN1	-0.385087	6.36199	1
12715	PRRC2C	-0.384969	8.22079	0.614455
18543	ZNF841	-0.384924	6.5912	1
12282	PNPLA1	-0.384848	6.33646	1
16766	TPTE	-0.384816	6.34017	1
13100	RAD54L	-0.384721	6.40211	1
17450	UTP18	-0.384707	6.43237	1
16054	TDH	-0.384689	6.31541	1
4963	FAM182B	-0.384508	6.31712	1
15302	SOX5	-0.38444	6.44892	1
14707	SLC38A10	-0.384403	6.34032	1
15276	SOD3	-0.384353	6.43183	1
17919	ZC3H6	-0.384243	7.71443	0.663626
12670	PROSER3	-0.384199	6.43218	1
11966	PHLPP1	-0.384169	6.40139	1
12971	PYY	-0.383515	6.30207	1
10598	MYOZ3	-0.383353	6.36348	1
4614	ENTPD5	-0.383345	6.5215	1
6402	HEMGN	-0.383314	6.32853	1
3637	CYP2A6	-0.383097	6.31217	1
14517	SLC13A2	-0.38309	6.48333	1
6529	HLA-DMA	-0.383048	6.7941	1
13376	RFX8	-0.382895	6.38489	1
14858	SMAD1	-0.382859	6.98322	1
5950	GOLGA6B	-0.382789	6.33019	1
12298	PODN	-0.382695	6.95425	1
1262	AURKB	-0.382688	6.38159	1
2379	CCL16	-0.382185	6.32968	1
4300	DYSF	-0.382113	6.4531	1
7973	LINC00545	-0.381947	6.34392	1
12176	PLEKHA8P1	-0.381694	6.37559	1
1844	C20orf203	-0.381668	6.31635	1
13208	RBBP4	-0.381587	6.88529	1
8692	LOC101929224	-0.381553	6.31205	1
7351	KCTD10	-0.381396	7.01768	0.726563
14112	SDF4	-0.381372	6.37749	1
10756	NCS1	-0.381362	6.3809	1
11913	PGM5-AS1	-0.381292	6.74296	1
756	AP4B1-AS1	-0.381089	6.52986	1
4863	FAM107A	-0.381065	7.3356	1
16339	TMCO6	-0.380957	6.36914	1
9651	MGC16275	-0.380905	6.40215	1
2178	CASKIN2	-0.380895	6.35036	1
17124	TVP23B	-0.380878	6.8394	1
4179	DPP8	-0.38071	6.60492	1
7731	LAMB2	-0.380497	7.93293	0.55724
12200	PLG	-0.380469	6.33409	1
9086	LRRC37A	-0.380446	6.42194	1
641	ANKRD20A3	-0.38039	6.33384	1
4385	EFCAB5	-0.380378	6.36466	1
13621	RNVU1-20	-0.380279	6.33724	1
15783	SVEP1	-0.38019	7.52366	0.80362
11422	OSR1	-0.380185	6.32019	1
7229	JAK3	-0.380001	6.66514	1
7872	LIG3	-0.379727	6.50573	1
15310	SP140	-0.379655	6.45128	1
15602	STAP1	-0.379545	6.33143	1
11311	OC90	-0.379531	6.31281	1
15387	SPIB	-0.379464	6.32816	1
13567	RNF213	-0.379237	7.26957	0.774414
18109	ZNF205-AS1	-0.379108	6.31698	1
6806	ICAM2	-0.379036	6.99717	1
8686	LOC101929128	-0.37894	6.3212	1
3175	COL1A2	-0.378807	11.9971	0.344841
9956	MIR621	-0.378736	6.32557	1
13197	RASSF6	-0.378526	6.35479	1
16413	TMEM17	-0.378474	6.40023	1
9422	MAX	-0.378366	6.95483	1
18425	ZNF669	-0.378157	6.42066	1
14179	SELV	-0.377874	6.30225	1
12888	PTPN5	-0.377781	6.31901	1
8608	LOC101927964	-0.377627	6.34623	1
11629	PCBP3	-0.377423	6.339	1
7729	LAMA5	-0.377124	6.38499	1
9418	MATN4	-0.377079	6.35586	1
10728	NCF1B	-0.377033	6.3429	1
478	ALB	-0.376879	6.33223	1
4123	DNMT3B	-0.376869	6.32803	1
9008	LOXL2	-0.376534	6.42622	1
4957	FAM178A	-0.376529	6.46135	1
14533	SLC16A12-AS1	-0.376367	6.30884	1
3778	DCUN1D5	-0.3763	6.44523	1
15892	TAF7L	-0.375981	6.31783	1
4049	DNAH5	-0.375978	6.35486	1
16107	TEX11	-0.375949	6.33324	1
2031	CA14	-0.375842	6.33269	1
15440	SPTB	-0.375708	6.32971	1
17949	ZDHHC14	-0.375675	6.34729	1
3179	COL24A1	-0.375628	6.3465	1
817	APOL5	-0.37562	6.34094	1
12218	PLP1	-0.375542	7.25704	0.774414
18110	ZNF207	-0.375417	7.73335	0.663625
502	ALG1	-0.37531	6.36103	1
2628	CDK18	-0.375078	6.33247	1
1139	ATHL1	-0.374976	6.42015	1
7806	LDLRAD3	-0.374874	6.3362	1
17356	UPK3A	-0.374858	6.34797	1
3288	CPA2	-0.374854	6.30283	1
2361	CCDC88A	-0.374634	6.76073	1
11994	PICK1	-0.374617	6.35622	1
11344	OLFM2	-0.374541	6.37351	1
7311	KCNH4	-0.374414	6.33	1
2934	CISD3	-0.374408	6.51279	1
16846	TRIM25	-0.374139	6.4376	1
1778	C1QTNF2	-0.374139	6.3641	1
6139	GRIK3	-0.374029	6.34472	1
3574	CXCL17	-0.373954	6.33061	1
10435	MTHFD2P1	-0.373946	6.32405	1
3765	DCT	-0.373922	6.43684	1
13607	RNU11	-0.373745	6.34253	1
4202	DRC1	-0.373567	6.33037	1
11008	NNMT	-0.373516	9.65452	0.667485
4048	DNAH3	-0.373512	6.35243	1
15253	SNX30	-0.37351	6.36894	1
2051	CACNA1A	-0.373233	6.34173	1
4204	DRG2	-0.373231	6.80249	1
9873	MIR4524B	-0.373171	6.29764	1
9005	LOXHD1	-0.373103	6.31715	1
13977	SARM1	-0.373099	6.33899	1
8610	LOC101928001	-0.373096	6.31391	1
16946	TRPV4	-0.373065	6.34097	1
9146	LSM12	-0.372996	7.19443	1
16184	THAP7-AS1	-0.372758	6.33163	1
14241	SERHL	-0.372554	6.58384	1
2902	CHST15	-0.372522	6.41896	1
2600	CDH18	-0.372501	6.32052	1
10880	NFAM1	-0.372396	6.31575	1
1763	C19orf60	-0.372179	6.42275	1
8293	LOC100129917	-0.371986	6.44297	1
9385	2001-03-01	-0.371863	6.43356	1
13505	RNASEH2B-AS1	-0.371721	6.33056	1
13050	RAB4B	-0.371542	6.38379	1
13548	RNF157-AS1	-0.371362	6.35602	1
12146	PLCD3	-0.37116	6.46995	1
2612	CDHR1	-0.371043	6.33325	1
14519	SLC13A4	-0.370945	6.41741	1
4047	DNAH2	-0.370855	6.35612	1
13144	RAP1GAP	-0.370675	6.3243	1
11928	PHB	-0.370551	7.05461	1
9312	MAOB	-0.370017	6.55666	1
4862	FAM105A	-0.369742	6.34483	1
16446	TMEM2	-0.369722	6.73643	1
11999	PIF1	-0.369689	6.30845	1
3197	COL6A2	-0.369673	6.78981	1
9432	MBD5	-0.369539	6.5404	1
929	ARHGEF38	-0.369523	6.51609	1
6246	GUCA1B	-0.369469	6.35282	1
13469	RIN3	-0.369149	6.35583	1
5120	FANCA	-0.369119	6.46172	1
17667	WDR63	-0.369013	6.36243	1
14047	SCGB1A1	-0.368965	6.31395	1
11407	OSBPL7	-0.36893	6.35235	1
7734	LAMB4	-0.368897	6.34217	1
14910	SMG8	-0.368868	6.36556	1
7879	LILRB1	-0.368827	6.33155	1
4041	DNAH10	-0.368713	6.35767	1
13330	REP15	-0.36851	6.33905	1
16995	TSPAN2	-0.36837	6.39766	1
5998	GP6	-0.3682	6.35531	1
8538	LOC101927153	-0.368188	6.32483	1
1439	BHLHB9	-0.368145	6.40518	1
15464	SREBF1	-0.367911	6.3696	1
5788	GIF	-0.367854	6.31891	1
8099	LINC01116	-0.367798	6.85173	1
4023	DMBX1	-0.367738	6.32707	1
1409	BCRP3	-0.367558	6.36588	1
16218	THSD7A	-0.367449	6.45173	1
11622	PCAT7	-0.367436	6.32347	1
8017	LINC00840	-0.367358	6.4066	1
13423	RHBDL3	-0.367258	6.32363	1
9180	LURAP1L-AS1	-0.366886	6.30407	1
5180	FBXL22	-0.366827	6.33407	1
10535	MYH13	-0.366803	6.3219	1
531	ALOX12	-0.366802	6.46337	1
8792	LOC145474	-0.366594	6.32809	1
5209	FBXO39	-0.366455	6.29988	1
7215	IVD	-0.366446	6.49154	1
8562	LOC101927437	-0.366386	6.34999	1
10343	MRPS7	-0.366383	7.21014	1
14090	SCRN2	-0.366362	6.41484	1
8841	LOC285696	-0.366271	6.32408	1
9376	MAPKAPK5	-0.365936	6.55818	1
5845	GLIS1	-0.365748	6.3168	1
16817	TRAT1	-0.3654	6.55124	1
14889	SMC5-AS1	-0.365237	6.3343	1
7794	LCT	-0.365109	6.32656	1
16216	THSD1	-0.365059	6.41134	1
9247	MAD2L2	-0.364614	6.47918	1
5283	FFAR2	-0.364421	6.33001	1
2973	CLDN10-AS1	-0.364368	6.75686	1
17272	UBXN6	-0.364303	6.55346	1
17669	WDR65	-0.364253	6.37009	1
5495	FRMD4A	-0.364198	6.63168	1
10980	NLRP3	-0.364098	6.74962	1
6871	IFT140	-0.364082	6.37378	1
11194	NT5M	-0.364027	6.3082	1
5530	FTO-IT1	-0.363998	6.32981	1
2986	CLDND2	-0.363879	6.35334	1
6316	HARS2	-0.363639	6.50831	1
15875	TAF13	-0.363589	6.7433	1
11965	PHLDB3	-0.363574	6.36282	1
12849	PTGIR	-0.363542	6.32699	1
6411	HERC2	-0.363419	6.61729	1
14542	SLC17A4	-0.363177	6.32898	1
178	ACSBG2	-0.363054	6.34501	1
14682	SLC35B4	-0.362973	6.39087	1
18296	ZNF503-AS1	-0.362952	6.33377	1
9872	MIR4524A	-0.36281	6.29702	1
5760	GFRA2	-0.362658	6.33427	1
8534	LOC101927142	-0.362496	6.32838	1
9678	MICALCL	-0.3623	6.36425	1
4121	DNMT1	-0.362287	6.61077	1
11328	OGDH	-0.362276	6.66909	1
686	ANKS3	-0.362088	6.33703	1
10121	MLK7-AS1	-0.36201	6.44283	1
5081	FAM74A6	-0.361859	6.30491	1
11478	P4HTM	-0.361607	6.46835	1
14197	SEMA6A-AS1	-0.361594	6.4474	1
16515	TMEM44	-0.361581	6.36376	1
16057	TDP2	-0.361581	6.82792	1
13046	RAB42	-0.361517	6.33224	1
8552	LOC101927274	-0.361466	6.32132	1
10729	NCF1C	-0.361423	6.34214	1
1561	BSPH1	-0.361352	6.3059	1
2786	CFAP221	-0.36119	6.32067	1
9167	LTBP3	-0.361112	6.35966	1
6080	GPR82	-0.360787	6.34331	1
17735	WRAP53	-0.360727	6.45679	1
17191	UBASH3B	-0.360699	6.33168	1
16840	TRIM17	-0.360629	6.34572	1
16112	TEX26-AS1	-0.360528	6.32197	1
10100	MKL2	-0.360523	6.90085	1
11707	PCNX	-0.360404	6.56614	1
9867	MIR4461	-0.360391	6.35007	1
18043	ZMYM1	-0.360342	6.62986	1
6310	HAO1	-0.360236	6.3127	1
7123	IRF4	-0.360159	6.36949	1
14942	SMTN	-0.359987	6.37123	1
15878	TAF1A-AS1	-0.359984	6.3846	1
11271	NUP85	-0.35979	6.97719	1
8609	LOC101927967	-0.359541	6.32174	1
3500	CTGF	-0.359462	8.66838	0.553144
10829	NECAB2	-0.359418	6.31711	1
8646	LOC101928448	-0.359368	6.33976	1
6961	IL1B	-0.359307	6.90667	1
3468	CT45A5	-0.359174	6.31073	1
13356	RFNG	-0.359068	6.35422	1
8602	LOC101927844	-0.359034	6.30376	1
10008	MIR6785	-0.358995	6.34442	1
18546	ZNF846	-0.358925	6.41807	1
12001	PIGA	-0.358748	6.57014	1
10981	NLRP7	-0.358668	6.32324	1
8567	LOC101927495	-0.358579	6.30858	1
16593	TMTC2	-0.358502	6.39168	1
6170	GS1-600G8.3	-0.358453	6.36463	1
5463	FOXK2	-0.358181	6.42991	1
6947	IL15	-0.357829	6.38121	1
2063	CACNA2D3	-0.357824	6.41353	1
8508	LOC101926911	-0.357649	6.33491	1
9546	MEFV	-0.357648	6.31988	1
3465	CT45A2	-0.357537	6.31065	1
8753	LOC102723680	-0.357537	6.31065	1
8756	LOC102723737	-0.357537	6.31065	1
17034	TTC21B-AS1	-0.357508	6.32099	1
16048	TCTN1	-0.357495	6.62251	1
8324	LOC100132529	-0.357395	6.31731	1
6207	GTF2A1	-0.357235	6.58287	1
4308	E2F3	-0.357075	6.36148	1
6041	GPR112	-0.356939	6.31089	1
4234	DTNA	-0.356928	6.54942	1
11460	P2RX1	-0.356735	6.41778	1
16935	TRPM3	-0.356405	6.34499	1
[truncated: 16,620 more rows]

## Sheet: Upper dermis
source	term_name	term_id	adjusted_p_value	negative_log10_of_adjusted_p_value	term_size	query_size	intersection_size	effective_domain_size	intersections
GO:BP	cellular response to interferon-gamma	GO:0071346	0.00105662	2.97608	177	601	21	18123	CCL23,CCL19,CCL5,LGALS9,CCL14,HLA-DRA,EDN1,RAB43,HLA-F,HLA-B,PTAFR,HLA-A,HLA-DQB1,CCL3L1,STXBP3,ADAMTS13,HLA-DQA1,IRF7,SOCS3,ACTG1,STXBP4
GO:BP	response to interferon-gamma	GO:0034341	0.00666254	2.17636	198	601	21	18123	CCL23,CCL19,CCL5,LGALS9,CCL14,HLA-DRA,EDN1,RAB43,HLA-F,HLA-B,PTAFR,HLA-A,HLA-DQB1,CCL3L1,STXBP3,ADAMTS13,HLA-DQA1,IRF7,SOCS3,ACTG1,STXBP4
GO:BP	cellular homeostasis	GO:0019725	0.00959563	2.01793	986	601	60	18123	NR1D1,CCL23,CA7,CCL19,CCL5,TMEM199,LRRC8E,CCL14,P2RY6,MUC17,NME2,TAOK1,GRN,TEN1,TENC1,SLC4A4,TAC4,SLC9A5,CCR8,EDN1,SLC4A1,CCDC47,LPO,CAV3,CD19,ATP2B1,MCOLN2,PTH1R,PRND,MT1M,CD52,P2RY8,ABCC8,CDH23,RFC2,CXCL13,TFR2,NGFR,LARGE,PKHD1,SLC34A2,SLC46A1,ATP1A2,SLC12A3,SLC9A3R1,RAC2,NME1,ARF1,TRPM2,JPH1,AKAP6,STXBP3,CCR7,SLC39A5,RYR2,SMARCB1,MS4A1,SLC12A9,STXBP4,TMPRSS6
GO:BP	cellular response to organic substance	GO:0071310	0.0150045	1.82378	2821	601	134	18123	COL1A1,MAPT,NR1D1,PPP1R9B,CCL23,TNFRSF11B,CCL19,ZBP1,CCL5,LGALS9,P2RY13,CCL14,P2RY6,HLA-DRA,SOSTDC1,NODAL,CGN,NME2,VIL1,BRCA1,LBP,NRROS,CXCL2,TENC1,DAND5,SOX9,POLR2E,CCR8,EDN1,ARHGDIA,NEFH,GREM2,SLC1A2,NF1,CSF2RA,PSMD12,BPTF,RAB43,H3F3B,HSPA5,XDH,MAP2K3,CYSLTR2,GPR21,THRA,RAMP2,PRKAR1A,RPTOR,ZNF35,DDX11,EHD1,RGS9,IFI35,CAV3,PLOD3,HLA-F,RPE65,STAT3,HLA-B,KRT8,ATP2B1,CYP1A1,PDIA5,WNT3,GOSR2,TAB1,IT…
GO:BP	neutrophil chemotaxis	GO:0030593	0.016114	1.7928	102	601	14	18123	CCL23,CCL19,CCL5,CCL14,LBP,CXCL2,EDN1,CXCL13,CXCL3,CXCL1,RAC2,CCL3L1,CCR7,PREX1
GO:BP	regulation of innate immune response	GO:0045088	0.0175018	1.75692	316	601	27	18123	ZBP1,CCL5,LGALS9,MUC17,GRN,LBP,MUC3A,PIK3R6,SH2D1B,DHX58,PSMD12,IFI35,HLA-F,HLA-B,TAB1,KLRC2,PSMB10,MUC20,PSMB3,HLA-A,DCST1,CASP8,TTLL12,STAT5B,PSMC5,IRF7,SOCS3
GO:BP	positive regulation of hydrolase activity	GO:0051345	0.0298713	1.52475	733	601	47	18123	MAPT,CLDN4,CCL23,CCL19,CCL5,LGALS9,CHN1,CCL14,P2RY6,RASAL3,NODAL,GRN,CHN2,ARHGDIA,LLGL2,NF1,XDH,RASGRF1,DDX11,RGS9,RINL,STAT3,TBCD,PTAFR,TNFSF15,CXCL13,RABEP2,NGFR,MYO9B,ARHGAP18,IQGAP3,CASP8,PCOLCE,ERBB2,RASGRP2,CCL3L1,TBC1D3,STARD13,SFRP2,RUNDC1,NLRP12,CCR7,AKT2,DOCK8,ARHGAP39,PREX1,TBC1D3H
GO:BP	neutrophil migration	GO:1990266	0.0299854	1.52309	122	601	15	18123	CCL23,CCL19,CCL5,CCL14,LBP,CXCL2,EDN1,MCOLN2,CXCL13,CXCL3,CXCL1,RAC2,CCL3L1,CCR7,PREX1
GO:BP	maternal process involved in parturition	GO:0060137	0.0405536	1.39197	6	601	4	18123	NODAL,EDN1,CYP1A1,PTAFR
GO:BP	cellular response to chemokine	GO:1990869	0.0444515	1.35211	97	601	13	18123	CCL23,CCL19,CCL5,CCL14,CXCL2,CCR8,EDN1,CXCL13,CXCL3,CXCL1,CCL3L1,CCR7,DOCK8
GO:BP	response to chemokine	GO:1990868	0.0444515	1.35211	97	601	13	18123	CCL23,CCL19,CCL5,CCL14,CXCL2,CCR8,EDN1,CXCL13,CXCL3,CXCL1,CCL3L1,CCR7,DOCK8
GO:BP	positive regulation of GTPase activity	GO:0043547	0.0536447	1.27047	414	601	31	18123	CCL23,CCL19,CCL5,CHN1,CCL14,RASAL3,CHN2,ARHGDIA,LLGL2,NF1,RASGRF1,RGS9,RINL,TBCD,CXCL13,RABEP2,MYO9B,ARHGAP18,IQGAP3,ERBB2,RASGRP2,CCL3L1,TBC1D3,STARD13,RUNDC1,CCR7,AKT2,DOCK8,ARHGAP39,PREX1,TBC1D3H
GO:BP	extracellular matrix organization	GO:0030198	0.0675815	1.17017	419	601	31	18123	COL1A1,TNFRSF11B,ITGB4,COL8A1,ITGA2B,ELF3,NCAN,COL9A2,LAMC3,SOX9,COL14A1,TTR,TLL2,TPSAB1,NF1,ACAN,TIMP2,RAMP2,PLOD3,BGN,ITGAM,MMP9,COL18A1,COL13A1,MMP28,GAS2,SFRP2,ADAMTS13,ADAMTS10,RGCC,TMPRSS6
GO:BP	chemokine-mediated signaling pathway	GO:0070098	0.0691588	1.16015	87	601	12	18123	CCL23,CCL19,CCL5,CCL14,CXCL2,CCR8,EDN1,CXCL13,CXCL3,CXCL1,CCL3L1,CCR7
GO:BP	cellular response to chemical stimulus	GO:0070887	0.0705714	1.15137	3443	601	154	18123	COL1A1,MAPT,NR1D1,PPP1R9B,CCL23,TNFRSF11B,CCL19,ZBP1,CCL5,TMEM199,LGALS9,P2RY13,LRRC8E,CCL14,CCL15-CCL14,P2RY6,HLA-DRA,SOSTDC1,NODAL,CGN,CCL27,NME2,VIL1,BRCA1,LBP,NRROS,CXCL2,TENC1,DAND5,SOX9,POLR2E,CCR8,EDN1,ARHGDIA,NEFH,GREM2,HBA2,SLC1A2,FMO3,NF1,CSF2RA,PSMD12,BPTF,RAB43,H3F3B,HSPA5,XDH,MAP2K3,COX4I2,CYSLTR2,GPR21,THRA,RAMP2,PRKAR1A,RPTOR,ZNF35,DDX11,LPO,EHD1,RGS9,IFI35,CAV3,GPX4,PLOD3,HLA-F,RP…
GO:BP	extracellular structure organization	GO:0043062	0.0707358	1.15036	420	601	31	18123	COL1A1,TNFRSF11B,ITGB4,COL8A1,ITGA2B,ELF3,NCAN,COL9A2,LAMC3,SOX9,COL14A1,TTR,TLL2,TPSAB1,NF1,ACAN,TIMP2,RAMP2,PLOD3,BGN,ITGAM,MMP9,COL18A1,COL13A1,MMP28,GAS2,SFRP2,ADAMTS13,ADAMTS10,RGCC,TMPRSS6
GO:BP	cellular response to cytokine stimulus	GO:0071345	0.0725569	1.13932	1148	601	64	18123	COL1A1,NR1D1,CCL23,TNFRSF11B,CCL19,ZBP1,CCL5,LGALS9,CCL14,HLA-DRA,BRCA1,LBP,CXCL2,SOX9,CCR8,EDN1,NEFH,GREM2,CSF2RA,PSMD12,RAB43,HSPA5,IFI35,HLA-F,STAT3,HLA-B,KRT8,TAB1,ITGAM,GRB2,PTAFR,MMP9,PSMB10,IFI27,TNFSF15,CXCL13,PSMB3,CXCL3,MST1R,IL7,HLA-A,DCST1,CASP8,F13A1,HLA-DQB1,CXCL1,CCL3L1,ARF1,SPHK1,NLRP12,AKAP6,STXBP3,CCR7,TTLL12,DOCK8,STAT5B,ADAMTS13,HLA-DQA1,PSMC5,IRF7,SOCS3,ACTG1,STXBP4,PELI3
GO:BP	external encapsulating structure organization	GO:0045229	0.0774492	1.11098	422	601	31	18123	COL1A1,TNFRSF11B,ITGB4,COL8A1,ITGA2B,ELF3,NCAN,COL9A2,LAMC3,SOX9,COL14A1,TTR,TLL2,TPSAB1,NF1,ACAN,TIMP2,RAMP2,PLOD3,BGN,ITGAM,MMP9,COL18A1,COL13A1,MMP28,GAS2,SFRP2,ADAMTS13,ADAMTS10,RGCC,TMPRSS6
GO:BP	homeostatic process	GO:0042592	0.0806238	1.09354	1985	601	98	18123	NR1D1,CLDN4,CCL23,SLN,TNFRSF11B,CA7,CCL19,CCL5,TMEM199,LGALS9,LRRC8E,CCL14,P2RY6,MUC17,NME2,TAOK1,GRN,TMC8,TEN1,TENC1,EPB42,SLC4A4,SOX9,TAC4,CROCC,SLC9A5,LYZ,CCR8,EDN1,SLC4A1,NF1,PLAC8,CCDC47,SLC28A2,GPR21,THRA,PRKAR1A,KRT16,LPO,EHD1,WNK2,CAV3,CD19,UNC80,SIRT6,RPE65,STAT3,ATP2B1,MCOLN2,PTH1R,PRND,SLX4,MT1M,CD52,P2RY8,ABCC8,CDH23,RFC2,CXCL13,TFR2,PQLC2,NGFR,IL7,PIGR,LARGE,PKHD1,TSHR,RAD51C,ADCY1,R…
GO:BP	ion homeostasis	GO:0050801	0.100421	0.998174	814	601	49	18123	CCL23,CA7,CCL19,CCL5,TMEM199,CCL14,P2RY6,GRN,TMC8,EPB42,SLC4A4,TAC4,SLC9A5,CCR8,EDN1,SLC4A1,CCDC47,WNK2,CAV3,CD19,UNC80,ATP2B1,MCOLN2,PTH1R,PRND,MT1M,CD52,P2RY8,CDH23,CXCL13,TFR2,PKHD1,CORIN,SLC34A2,SLC46A1,ATP1A2,SLC12A3,SLC9A3R1,ARF1,TRPM2,JPH1,CACNA1G,AKAP6,CCR7,SLC39A5,RYR2,MS4A1,SLC12A9,TMPRSS6
GO:BP	chemical homeostasis	GO:0048878	0.117116	0.931384	1238	601	67	18123	NR1D1,CLDN4,CCL23,CA7,CCL19,CCL5,TMEM199,CCL14,P2RY6,NME2,GRN,TMC8,EPB42,SLC4A4,TAC4,SLC9A5,CCR8,EDN1,SLC4A1,CCDC47,GPR21,PRKAR1A,KRT16,EHD1,WNK2,CAV3,CD19,UNC80,STAT3,ATP2B1,MCOLN2,PTH1R,PRND,MT1M,CD52,P2RY8,ABCC8,CDH23,CXCL13,TFR2,PQLC2,NGFR,PKHD1,ADCY1,CORIN,SLC34A2,SLC46A1,ATP1A2,SLC12A3,CYP7B1,SLC9A3R1,NME1,ARF1,TRPM2,JPH1,CACNA1G,AKAP6,STXBP3,CCR7,SLC39A5,RYR2,ABCB4,SMARCB1,MS4A1,SLC12A9,ST…
GO:BP	regulation of GTPase activity	GO:0043087	0.11738	0.930406	493	601	34	18123	CCL23,CCL19,CCL5,CHN1,CCL14,RASAL3,FGD2,CHN2,ARHGDIA,LLGL2,DGKI,NF1,RASGRF1,RGS9,RINL,TBCD,CXCL13,RABEP2,MYO9B,ARHGAP18,IQGAP3,GPS1,ERBB2,RASGRP2,CCL3L1,TBC1D3,STARD13,RUNDC1,CCR7,AKT2,DOCK8,ARHGAP39,PREX1,TBC1D3H
GO:BP	regulation of biological quality	GO:0065008	0.138489	0.858585	4116	601	177	18123	COL1A1,MAPT,NR1D1,CHRND,CLDN4,ZACN,CCL23,SLN,TNFRSF11B,CA7,CCL19,ITGA2B,CCL5,TMEM199,LGALS9,CHRNG,ERAP2,LRRC8E,CCL14,P2RY6,MUC17,NME2,NOS1AP,TAOK1,GRN,SCN4A,TMC8,TEN1,VIL1,GRID2IP,FRRS1L,TENC1,EPB42,RPH3A,AARSD1,SLC4A4,SOX9,FGD2,TAC4,CROCC,SLC9A5,TTR,LYZ,CCR8,EDN1,ARHGDIA,DGKI,SLC4A1,SLC1A2,GALP,PIK3R6,NF1,PLAC8,CCDC47,PSMD12,FDXR,H3F3B,XDH,PRKCG,SLC28A2,ADD2,RASGRF1,GPR21,NMT1,THRA,RAMP2,PRKAR1A…
GO:BP	granulocyte chemotaxis	GO:0071621	0.165143	0.782139	125	601	14	18123	CCL23,CCL19,CCL5,CCL14,LBP,CXCL2,EDN1,CXCL13,CXCL3,CXCL1,RAC2,CCL3L1,CCR7,PREX1
GO:BP	dendritic cell migration	GO:0036336	0.165679	0.780733	32	601	7	18123	CCL19,CCL5,LGALS9,TRPM2,NLRP12,CCR7,DOCK8
GO:BP	immune response	GO:0006955	0.178938	0.747298	2544	601	118	18123	COL1A1,ADAMDEC1,CCL23,CCL19,ZBP1,FRMPD3,CCL5,LGALS9,ERAP2,SP2,CCL14,CCL15-CCL14,HLA-DRA,MUC17,CCL27,NME2,GRN,CD79B,LBP,NRROS,SPAG11A,CXCL2,ENPP2,GHDC,CLEC2A,VAT1,ALDOC,FER1L5,TTR,LYZ,MUC3A,CCR8,EDN1,GALP,PIK3R6,SH2D1B,PLAC8,DHX58,PSMD12,TIMP2,RAB43,APOL1,XDH,GGH,PTGDS,BPIFA2,SEC14L1,TTLL1,CYSLTR2,RAMP2,INSL3,PRKAR1A,KRT16,LPO,TMC6,IFI35,CD19,HLA-F,STAT3,HLA-B,GNLY,MCOLN2,PTH1R,TBKBP1,TAB1,KLRC2,I…
GO:BP	positive regulation of molecular function	GO:0044093	0.18257	0.73857	1774	601	88	18123	MAPT,CLDN4,CCL23,SLC5A3,CCL19,CCL5,LGALS9,CHN1,CCL14,P2RY6,RASAL3,NODAL,NOS1AP,TAOK1,GRN,FGD2,CHN2,EDN1,ARHGDIA,LLGL2,UHRF1,PIK3R6,NF1,SPON1,TRIM37,TIMP2,XDH,MAP2K3,ADD2,RASGRF1,DBF4B,RAMP2,PRKAR1A,RPTOR,DDX11,WNK2,RGS9,CD19,RINL,STAT3,TAB1,ITGAM,LILRA5,RIPK4,STAC3,TBCD,CARD10,PTAFR,MMP9,NLGN3,ABCC8,TNFSF15,RFC2,JUP,CXCL13,MUC20,MST1R,RABEP2,NGFR,MYO9B,GADD45B,ARHGAP18,IQGAP3,ADCY1,CASP8,PCOLCE,E…
GO:BP	inorganic ion homeostasis	GO:0098771	0.182949	0.737671	766	601	46	18123	CCL23,CA7,CCL19,CCL5,TMEM199,CCL14,P2RY6,GRN,TMC8,EPB42,SLC4A4,TAC4,SLC9A5,CCR8,EDN1,SLC4A1,CCDC47,CAV3,CD19,ATP2B1,MCOLN2,PTH1R,PRND,MT1M,CD52,P2RY8,CDH23,CXCL13,TFR2,PKHD1,CORIN,SLC34A2,SLC46A1,ATP1A2,SLC12A3,SLC9A3R1,ARF1,TRPM2,JPH1,AKAP6,CCR7,SLC39A5,RYR2,MS4A1,SLC12A9,TMPRSS6
GO:BP	cell activation	GO:0001775	0.211734	0.67421	1507	601	77	18123	COL1A1,MAPT,NR1D1,CCL19,ITGA2B,FRMPD3,CCL5,LGALS9,RASAL3,HLA-DRA,NME2,GRN,CD79B,LBP,GHDC,VAT1,ALDOC,FER1L5,TTR,LYZ,EDN1,DGKI,PIK3R6,SH2D1B,PLAC8,PSMD12,TIMP2,PRKCG,GGH,PTGDS,PRKAR1A,TMC6,IFI35,CD19,HLA-F,CD320,STAT3,HLA-B,KLRC2,ITGAM,LILRA5,KPNB1,GRB2,ICOS,TIGIT,PTAFR,MMP9,PSMB10,C17ORF99,TMEM98,JUP,IL7,PIGR,HLA-A,TSHR,CASP8,PDAP1,HLA-DQB1,CXCL1,ERBB2,RAC2,KAT7,PEAR1,TRPM2,SPHK1,STXBP3,CCR7,HDAC5…
GO:BP	G protein-coupled purinergic nucleotide receptor signaling pathway	GO:0035589	0.213911	0.669767	15	601	5	18123	P2RY13,P2RY6,P2RY14,PTAFR,P2RY8
GO:BP	immune system process	GO:0002376	0.221121	0.65537	3438	601	151	18123	COL1A1,MAPT,NR1D1,ADAMDEC1,CCL23,CCL19,ZBP1,ITGA2B,FRMPD3,CCL5,LGALS9,ERAP2,SP2,CCL14,CCL15-CCL14,RASAL3,HLA-DRA,MUC17,CCL27,NME2,GRN,CD79B,LBP,NRROS,SPAG11A,CXCL2,EPB42,ENPP2,SOX9,GHDC,CLEC2A,VAT1,ALDOC,FER1L5,RAB34,TTR,LYZ,MUC3A,CCR8,EDN1,SLC4A1,KIRREL3,GALP,PIK3R6,SH2D1B,PLAC8,DHX58,PSMD12,TIMP2,RAB43,H3F3B,APOL1,XDH,GGH,PTGDS,ADD2,BPIFA2,SEC14L1,TTLL1,CYSLTR2,THRA,RAMP2,INSL3,PRKAR1A,KRT16,LP…
GO:BP	ion transport	GO:0006811	0.229197	0.63979	1610	601	81	18123	CHRND,CLDN4,ZACN,SLN,CA7,SLC5A3,CCL19,CCL5,CHRNG,LRRC8E,P2RY6,NOS1AP,SLC25A42,SLC25A6,SCN4A,TMC8,KCND1,SLC36A2,SLC4A4,SLC5A11,SLC26A11,SLC9A5,EDN1,LLGL2,HBA2,SLC4A1,SLC1A2,KCNAB3,APOL1,ABCC3,SEC14L1,RASGRF1,COX4I2,RAMP2,ATP10A,ABCC11,WNK2,TMC6,RGS9,CAV3,CD19,UNC80,ATP2B1,MCOLN2,LILRA5,STAC3,HTR3D,FXYD7,PTAFR,MMP9,NLGN3,ABCC8,CDH23,TFR2,PQLC2,TTYH2,SLC34A2,SLC46A1,ATP1A2,SLC12A3,SLC5A5,SLC9A3R1,SL…
GO:BP	regulation of natural killer cell mediated immunity	GO:0002715	0.242281	0.615681	45	601	8	18123	LGALS9,PIK3R6,SH2D1B,HLA-F,HLA-B,KLRC2,HLA-A,STAT5B
GO:BP	cation homeostasis	GO:0055080	0.25234	0.598014	754	601	45	18123	CCL23,CA7,CCL19,CCL5,TMEM199,CCL14,P2RY6,GRN,TMC8,EPB42,SLC4A4,TAC4,SLC9A5,CCR8,EDN1,SLC4A1,CCDC47,CAV3,CD19,UNC80,ATP2B1,MCOLN2,PTH1R,PRND,MT1M,CD52,P2RY8,CDH23,CXCL13,TFR2,PKHD1,CORIN,SLC46A1,ATP1A2,SLC12A3,ARF1,TRPM2,JPH1,AKAP6,CCR7,SLC39A5,RYR2,MS4A1,SLC12A9,TMPRSS6
GO:BP	cytokine-mediated signaling pathway	GO:0019221	0.266549	0.574224	824	601	48	18123	CCL23,TNFRSF11B,CCL19,ZBP1,CCL5,CCL14,HLA-DRA,LBP,CXCL2,CCR8,EDN1,GREM2,CSF2RA,PSMD12,IFI35,HLA-F,STAT3,HLA-B,KRT8,TAB1,ITGAM,GRB2,PTAFR,MMP9,PSMB10,IFI27,TNFSF15,CXCL13,PSMB3,CXCL3,MST1R,IL7,HLA-A,DCST1,CASP8,F13A1,CXCL1,CCL3L1,ARF1,SPHK1,CCR7,TTLL12,STAT5B,HLA-DQA1,PSMC5,IRF7,SOCS3,PELI3
GO:BP	transmembrane transport	GO:0055085	0.298544	0.524992	1648	601	82	18123	CHRND,ZACN,SLN,SLC5A3,CCL19,CHRNG,LRRC8E,P2RY6,NOS1AP,SLC25A42,SLC25A6,SCN4A,TMC8,KCND1,SLC36A2,SLC4A4,SLC5A11,SLC26A11,SLC9A5,EDN1,SLC4A1,SLC1A2,KCNAB3,PSMD12,SLC25A39,HSPA5,APOL1,ABCC3,SLC28A2,ADD2,RASGRF1,COX4I2,ATP10A,ABCC11,WNK2,TMC6,RGS9,CAV3,CD19,UNC80,ATP2B1,MCOLN2,STAC3,HTR3D,FXYD7,PTAFR,MMP9,NLGN3,PSMB10,ABCC8,PSMB3,PAM16,PQLC2,SLC34A2,SLC46A1,ATP1A2,SLC12A3,SLC5A5,SLC9A3R1,SLC7A6,ARF1,…
GO:BP	granulocyte migration	GO:0097530	0.313018	0.504431	149	601	15	18123	CCL23,CCL19,CCL5,CCL14,LBP,CXCL2,EDN1,MCOLN2,CXCL13,CXCL3,CXCL1,RAC2,CCL3L1,CCR7,PREX1
GO:BP	cellular chemical homeostasis	GO:0055082	0.325423	0.487552	854	601	49	18123	NR1D1,CCL23,CA7,CCL19,CCL5,TMEM199,CCL14,P2RY6,NME2,GRN,SLC4A4,TAC4,SLC9A5,CCR8,EDN1,SLC4A1,CCDC47,CAV3,CD19,ATP2B1,MCOLN2,PTH1R,PRND,MT1M,CD52,P2RY8,ABCC8,CDH23,CXCL13,TFR2,NGFR,PKHD1,SLC34A2,SLC46A1,ATP1A2,SLC9A3R1,NME1,ARF1,TRPM2,JPH1,AKAP6,STXBP3,CCR7,SLC39A5,RYR2,SMARCB1,MS4A1,STXBP4,TMPRSS6
GO:BP	response to endogenous stimulus	GO:0009719	0.333107	0.477416	1729	601	85	18123	COL1A1,MAPT,NR1D1,CLDN4,PPP1R9B,TNFRSF11B,KRT19,CCL19,CCL5,P2RY6,SOSTDC1,NODAL,CGN,NME2,VIL1,BRCA1,NRROS,TENC1,DAND5,SOX9,POLR2E,EDN1,GREM2,SLC1A2,GALP,BPTF,TIMP2,H3F3B,HSPA5,GGH,CYSLTR2,GPR21,THRA,RAMP2,PRKAR1A,RPTOR,DDX11,KHK,EHD1,RGS9,CAV3,PLOD3,RPE65,STAT3,ATP2B1,TAB1,PPARA,EME1,SLX4,HTR3D,GRB2,PTAFR,ABCC8,JUP,CXCL13,TSHB,RPL27,NGFR,TSHR,RPL23,ADCY1,SLC34A2,ATP1A2,CYP7B1,SLC5A5,DDC,SLC9A3R1,T…
GO:BP	positive regulation of catalytic activity	GO:0043085	0.353743	0.451312	1383	601	71	18123	MAPT,CLDN4,CCL23,SLC5A3,CCL19,CCL5,LGALS9,CHN1,CCL14,P2RY6,RASAL3,NODAL,NOS1AP,TAOK1,GRN,FGD2,CHN2,EDN1,ARHGDIA,LLGL2,UHRF1,PIK3R6,NF1,TIMP2,XDH,MAP2K3,RASGRF1,DBF4B,PRKAR1A,RPTOR,DDX11,RGS9,CD19,RINL,STAT3,TAB1,ITGAM,LILRA5,TBCD,CARD10,PTAFR,TNFSF15,RFC2,CXCL13,MUC20,MST1R,RABEP2,NGFR,MYO9B,GADD45B,ARHGAP18,IQGAP3,ADCY1,CASP8,PCOLCE,ERBB2,RASGRP2,CCL3L1,TBC1D3,STARD13,SFRP2,RUNDC1,NLRP12,CCR7,AN…
GO:BP	ion transmembrane transport	GO:0034220	0.398182	0.399918	1169	601	62	18123	CHRND,ZACN,SLN,CCL19,CHRNG,LRRC8E,P2RY6,NOS1AP,SLC25A42,SLC25A6,SCN4A,TMC8,KCND1,SLC36A2,SLC4A4,SLC26A11,SLC9A5,SLC4A1,SLC1A2,KCNAB3,APOL1,ABCC3,RASGRF1,COX4I2,ATP10A,ABCC11,WNK2,TMC6,RGS9,CAV3,CD19,UNC80,ATP2B1,MCOLN2,STAC3,HTR3D,FXYD7,PTAFR,MMP9,NLGN3,ABCC8,PQLC2,SLC34A2,SLC46A1,ATP1A2,SLC12A3,SLC5A5,SLC9A3R1,ARF1,TMC7,SLC38A7,TRPM2,KCNU1,JPH1,CACNA1G,AKAP6,CCR7,SLC39A5,RYR2,TMC3,SLC12A9,SLC38A5
GO:BP	response to cytokine	GO:0034097	0.401398	0.396425	1242	601	65	18123	COL1A1,NR1D1,CCL23,TNFRSF11B,CCL19,ZBP1,CCL5,LGALS9,CCL14,HLA-DRA,BRCA1,LBP,CXCL2,SOX9,CCR8,EDN1,NEFH,GREM2,CSF2RA,PSMD12,TIMP2,RAB43,HSPA5,IFI35,HLA-F,STAT3,HLA-B,KRT8,TAB1,ITGAM,GRB2,PTAFR,MMP9,PSMB10,IFI27,TNFSF15,CXCL13,PSMB3,CXCL3,MST1R,IL7,HLA-A,DCST1,CASP8,F13A1,HLA-DQB1,CXCL1,CCL3L1,ARF1,SPHK1,NLRP12,AKAP6,STXBP3,CCR7,TTLL12,DOCK8,STAT5B,ADAMTS13,HLA-DQA1,PSMC5,IRF7,SOCS3,ACTG1,STXBP4,PEL…
GO:BP	response to biotic stimulus	GO:0009607	0.410868	0.386298	1639	601	81	18123	NR1D1,CCL23,DLEC1,CCL19,ZBP1,CCL5,LGALS9,CCL14,HLA-DRA,MUC17,GRN,VIL1,LBP,SPAG11A,CXCL2,CLEC2A,LYZ,MUC3A,EDN1,DCLK1,GALP,PIK3R6,SH2D1B,PLAC8,CCDC47,DHX58,PSMD12,RAB43,HSPA5,APOL1,BPIFA2,SEC14L1,KRT16,LPO,IFI35,HLA-F,HLA-B,KRT8,CYP1A1,GNLY,MCOLN2,TBKBP1,TAB1,KLRC2,ITGAM,LILRA5,EME1,SLX4,PTAFR,PSMB10,ABCC8,IFI27,CXCL13,MUC20,PSMB3,STYK1,CXCL3,MST1R,HLA-A,DCST1,CASP8,HLA-DQB1,CXCL1,BECN1,CCL3L1,ARF1…
GO:BP	response to organic substance	GO:0010033	0.425961	0.37063	3457	601	150	18123	HSPB3,COL1A1,MAPT,NR1D1,CLDN4,PPP1R9B,CCL23,TNFRSF11B,KRT19,CCL19,ZBP1,CCL5,LGALS9,P2RY13,CCL14,P2RY6,HLA-DRA,SOSTDC1,NODAL,CGN,NME2,VIL1,BRCA1,LBP,NRROS,CXCL2,TENC1,DAND5,SOX9,POLR2E,CCR8,EDN1,ARHGDIA,NEFH,GREM2,SLC1A2,GALP,NF1,CSF2RA,CCDC47,PSMD12,BPTF,TIMP2,RAB43,H3F3B,HSPA5,XDH,MAP2K3,PRKCG,GGH,CYSLTR2,GPR21,THRA,RAMP2,PRKAR1A,RPTOR,ZNF35,DDX11,KHK,EHD1,RGS9,IFI35,CAV3,GPX4,PLOD3,HLA-F,RPE65,…
GO:BP	transport	GO:0006810	0.435368	0.361143	5214	601	213	18123	COL1A1,MAPT,NR1D1,CHRND,LGI3,CLDN4,ZACN,SLN,CA7,SLC5A3,CCL19,LRPAP1,ITGA2B,FRMPD3,CCL5,LGALS9,COPZ2,CHRNG,LRRC8E,P2RY6,NME2,NOS1AP,ADRBK2,KIF5C,SLC25A42,RSPO1,GRK4,GRN,SLC25A6,SCN4A,TMC8,KCND1,VIL1,RPH3AL,LBP,SLC36A2,SRSF1,RPH3A,SLC4A4,LGALS3BP,ENPP2,NACAD,GHDC,SLC5A11,VAT1,SLC26A11,ALDOC,CASC3,SLC9A5,FER1L5,RAB34,TTR,LYZ,JAKMIP1,EDN1,RPL38,NEFH,LLGL2,DCLK1,HBA2,DGKI,SLC4A1,SLC1A2,RPL19,PLAC8,KCN…
GO:BP	anion transport	GO:0006820	0.456741	0.34033	529	601	34	18123	CLDN4,CA7,LRRC8E,P2RY6,SLC25A42,SLC25A6,SLC36A2,SLC4A4,SLC26A11,SLC9A5,EDN1,LLGL2,HBA2,SLC4A1,SLC1A2,APOL1,ABCC3,ABCC11,PTAFR,PQLC2,TTYH2,SLC34A2,SLC46A1,ATP1A2,SLC12A3,SLC5A5,SLC9A3R1,SLC7A6,PLA2G4F,SLC38A7,SLC7A9,ABCB4,SLC12A9,SLC38A5
GO:BP	response to external stimulus	GO:0009605	0.487077	0.312403	3114	601	137	18123	COL1A1,NR1D1,PPP1R9B,PDZD7,CCL23,TNFRSF11B,CCL19,ZBP1,CCL5,LGALS9,CHN1,CCL14,CCL15-CCL14,HLA-DRA,MUC17,CCL27,KIF5C,GRK4,GRN,KPTN,VIL1,LBP,ULK2,SPAG11A,CXCL2,LRTM1,ENPP2,SOX9,TAC4,CLEC2A,LYZ,MUC3A,CCR8,EDN1,ARHGDIA,DCLK1,SLC1A2,GALP,PIK3R6,SH2D1B,PLAC8,DHX58,PSMD12,RAB43,HSPA5,APOL1,PRKCG,BPIFA2,SEC14L1,CYSLTR2,GNGT2,NMT1,RAMP2,INSL3,PRKAR1A,SEMA6C,RPTOR,KRT16,LPO,IFI35,CAV3,GPX4,HLA-F,SIRT6,RPE65…
GO:BP	leukocyte chemotaxis	GO:0030595	0.504712	0.296956	227	601	19	18123	CCL23,CCL19,CCL5,LGALS9,CCL14,CCL27,LBP,CXCL2,EDN1,CXCL13,CXCL3,MMP28,CYP7B1,CXCL1,RAC2,CCL3L1,TRPM2,CCR7,PREX1
GO:BP	defense response	GO:0006952	0.512295	0.29048	1956	601	93	18123	NR1D1,CCL23,DLEC1,CCL19,ZBP1,IGFBP4,ANKFN1,CCL5,LGALS9,CCL14,HLA-DRA,ELF3,MUC17,GRN,LBP,NRROS,SPAG11A,CXCL2,LGALS3BP,TAC4,CLEC2A,LYZ,MUC3A,EDN1,TPSAB1,GALP,PIK3R6,SH2D1B,PLAC8,DHX58,PSMD12,RAB43,APOL1,MAP2K3,BPIFA2,SEC14L1,CYSLTR2,RAMP2,INSL3,PRKAR1A,KRT16,LPO,IFI35,GPX4,HLA-F,STAT3,HLA-B,GNLY,MCOLN2,PTH1R,TBKBP1,TAB1,KLRC2,ITGAM,LILRA5,PPARA,PTAFR,MMP9,PSMB10,IFI27,CXCL13,MUC20,PSMB3,TFR2,STYK1,…
GO:BP	regulation of response to biotic stimulus	GO:0002831	0.517113	0.286414	426	601	29	18123	ZBP1,CCL5,LGALS9,MUC17,GRN,LBP,MUC3A,PIK3R6,SH2D1B,DHX58,PSMD12,SEC14L1,IFI35,HLA-F,HLA-B,TAB1,KLRC2,PSMB10,MUC20,PSMB3,HLA-A,DCST1,CASP8,TTLL12,TSPAN32,STAT5B,PSMC5,IRF7,SOCS3
GO:BP	leukocyte migration	GO:0050900	0.51846	0.285285	511	601	33	18123	COL1A1,CCL23,CCL19,ITGA2B,CCL5,LGALS9,CCL14,CCL27,LBP,CXCL2,EDN1,ADD2,MCOLN2,ITGAM,GRB2,PTAFR,MMP9,CXCL13,CXCL3,MMP28,CYP7B1,SLC7A6,CXCL1,RAC2,CCL3L1,TRPM2,SLC7A9,NLRP12,CCR7,ANGPT4,DOCK8,STAT5B,PREX1
GO:BP	myofibril assembly	GO:0030239	0.520721	0.283395	63	601	9	18123	KRT19,EDN1,PRKAR1A,CAV3,KRT8,SYNPO2L,TMOD4,FLII,ACTG1
GO:BP	regulation of signaling	GO:0023051	0.562902	0.249567	3669	601	157	18123	COL1A1,MAPT,NR1D1,PPP1R9B,CCL23,CA7,CCL19,LRPAP1,ZBP1,IGFBP4,DUSP14,CCL5,LGALS9,CHN1,CCL14,P2RY6,RASAL3,ELF3,SOSTDC1,NODAL,NOS1AP,RSPO1,TAOK1,GRK4,LRRC59,KPTN,TMC8,GRID2IP,BRCA1,FRRS1L,LBP,NRROS,RNF43,TENC1,DAND5,SOX9,GPC2,FGD2,CHN2,PLEKHA4,RAB34,EDN1,ARHGDIA,LLGL2,GREM2,DGKI,PIK3R6,NF1,DHX58,PSMD12,TIMP2,H3F3B,HSPA5,XDH,MAP2K3,PRKCG,SEC14L1,RASGRF1,GPR21,APCDD1,MTRNR2L2,NMT1,THRA,RAMP2,INSL3,PRK…
GO:BP	striated muscle cell development	GO:0055002	0.588394	0.230332	64	601	9	18123	KRT19,EDN1,PRKAR1A,CAV3,KRT8,SYNPO2L,TMOD4,FLII,ACTG1
GO:BP	cellular ion homeostasis	GO:0006873	0.611062	0.213915	693	601	41	18123	CCL23,CA7,CCL19,CCL5,TMEM199,CCL14,P2RY6,GRN,SLC4A4,TAC4,SLC9A5,CCR8,EDN1,SLC4A1,CCDC47,CAV3,CD19,ATP2B1,MCOLN2,PTH1R,PRND,MT1M,CD52,P2RY8,CDH23,CXCL13,TFR2,PKHD1,SLC34A2,SLC46A1,ATP1A2,SLC9A3R1,ARF1,TRPM2,JPH1,AKAP6,CCR7,SLC39A5,RYR2,MS4A1,TMPRSS6
GO:BP	cellular response to organonitrogen compound	GO:0071417	0.621993	0.206215	671	601	40	18123	COL1A1,PPP1R9B,P2RY6,BRCA1,TENC1,SOX9,EDN1,SLC1A2,HSPA5,CYSLTR2,GPR21,PRKAR1A,RPTOR,DDX11,RGS9,CAV3,RPE65,STAT3,ATP2B1,HTR3D,GRB2,PTAFR,JUP,NGFR,TSHR,RPL23,ADCY1,SLC5A5,DDC,SLC9A3R1,TRIM72,PIP4K2B,TRPM2,AKAP6,HDAC5,AKT2,RYR2,STAT5B,SOCS3,STXBP4
GO:BP	collagen fibril organization	GO:0030199	0.631086	0.199912	109	601	12	18123	COL1A1,ITGB4,COL8A1,COL9A2,COL14A1,TLL2,NF1,ACAN,PLOD3,COL18A1,COL13A1,SFRP2
GO:BP	establishment of localization	GO:0051234	0.662035	0.179119	5364	601	217	18123	COL1A1,MAPT,NR1D1,CHRND,LGI3,CLDN4,PDZD7,ZACN,SLN,CA7,SLC5A3,CCL19,LRPAP1,ITGA2B,FRMPD3,CCL5,LGALS9,COPZ2,CHRNG,LRRC8E,P2RY6,NME2,NOS1AP,ADRBK2,KIF5C,SLC25A42,RSPO1,GRK4,GRN,SLC25A6,SCN4A,TMC8,KCND1,VIL1,RPH3AL,LBP,SLC36A2,SRSF1,RPH3A,SLC4A4,LGALS3BP,ENPP2,NACAD,GHDC,SLC5A11,VAT1,CROCC,SLC26A11,ALDOC,CASC3,SLC9A5,FER1L5,RAB34,TTR,LYZ,JAKMIP1,EDN1,RPL38,NEFH,LLGL2,DCLK1,HBA2,DGKI,SLC4A1,SLC1A2,RPL…
GO:BP	leukocyte activation	GO:0045321	0.698129	0.156064	1341	601	68	18123	MAPT,NR1D1,CCL19,FRMPD3,CCL5,LGALS9,RASAL3,HLA-DRA,NME2,GRN,CD79B,LBP,GHDC,VAT1,ALDOC,FER1L5,TTR,LYZ,EDN1,PIK3R6,SH2D1B,PLAC8,PSMD12,TIMP2,GGH,PTGDS,PRKAR1A,TMC6,IFI35,CD19,HLA-F,CD320,STAT3,HLA-B,KLRC2,ITGAM,KPNB1,GRB2,ICOS,TIGIT,PTAFR,MMP9,PSMB10,C17ORF99,TMEM98,JUP,IL7,PIGR,HLA-A,TSHR,CASP8,PDAP1,HLA-DQB1,CXCL1,ERBB2,RAC2,KAT7,TRPM2,SPHK1,STXBP3,CCR7,HDAC5,DOCK8,TSPAN32,STAT5B,SIGLEC5,MS4A1,PR…
GO:BP	regulation of signal transduction	GO:0009966	0.728706	0.137448	3251	601	141	18123	COL1A1,MAPT,NR1D1,PPP1R9B,CCL23,CCL19,LRPAP1,ZBP1,IGFBP4,DUSP14,CCL5,LGALS9,CHN1,CCL14,P2RY6,RASAL3,ELF3,SOSTDC1,NODAL,NOS1AP,RSPO1,TAOK1,GRK4,LRRC59,KPTN,TMC8,BRCA1,FRRS1L,LBP,NRROS,RNF43,TENC1,DAND5,SOX9,GPC2,FGD2,CHN2,PLEKHA4,RAB34,EDN1,ARHGDIA,LLGL2,GREM2,DGKI,PIK3R6,NF1,DHX58,PSMD12,TIMP2,H3F3B,HSPA5,XDH,MAP2K3,SEC14L1,RASGRF1,GPR21,APCDD1,MTRNR2L2,NMT1,THRA,RAMP2,INSL3,PRKAR1A,MVB12A,RPTOR,…
GO:BP	anion transmembrane transport	GO:0098656	0.741238	0.130042	253	601	20	18123	LRRC8E,SLC25A42,SLC25A6,SLC4A4,SLC26A11,SLC9A5,SLC4A1,SLC1A2,APOL1,ABCC3,ABCC11,PTAFR,PQLC2,SLC46A1,ATP1A2,SLC12A3,SLC5A5,SLC38A7,SLC12A9,SLC38A5
GO:BP	antigen processing and presentation of endogenous peptide antigen	GO:0002483	0.741887	0.129662	19	601	5	18123	ERAP2,HLA-DRA,HLA-F,HLA-B,HLA-A
GO:BP	localization	GO:0051179	0.741959	0.12962	6938	601	271	18123	COL1A1,MAPT,NR1D1,CHRND,LGI3,CLDN4,PPP1R9B,PDZD7,ZACN,CCL23,SLN,ITGB4,CA7,SLC5A3,CCL19,LRPAP1,ITGA2B,FRMPD3,CCL5,LGALS9,COPZ2,CHRNG,LRRC8E,CCL14,CCL15-CCL14,P2RY6,NODAL,CCL27,NME2,NOS1AP,ADRBK2,KIF5C,SLC25A42,RSPO1,GRK4,GRN,SLC25A6,SCN4A,KPTN,TMC8,KCND1,VIL1,RPH3AL,UNK,LBP,NRROS,SLC36A2,SRSF1,CXCL2,RPH3A,SLC4A4,LGALS3BP,ENPP2,NACAD,DAND5,LAMC3,SOX9,GPC2,TAC4,GHDC,SLC5A11,VAT1,CROCC,SLC26A11,ALDOC…
GO:BP	regulation of response to stimulus	GO:0048583	0.777981	0.109031	4416	601	183	18123	COL1A1,MAPT,NR1D1,CLDN4,PPP1R9B,SGCA,CCL23,CCL19,LRPAP1,ZBP1,IGFBP4,DUSP14,CCL5,LGALS9,CHN1,CCL14,P2RY6,RASAL3,HLA-DRA,ELF3,MUC17,SOSTDC1,NODAL,CCL27,NOS1AP,RSPO1,TAOK1,GRK4,GRN,LRRC59,KPTN,TMC8,CD79B,VIL1,BRCA1,FRRS1L,LBP,NRROS,RNF43,TENC1,DAND5,SOX9,GPC2,FGD2,CHN2,PLEKHA4,RAB34,MUC3A,EDN1,ARHGDIA,LLGL2,GREM2,DGKI,PIK3R6,NF1,SH2D1B,DHX58,PSMD12,TIMP2,H3F3B,HSPA5,XDH,MAP2K3,PRKCG,SEC14L1,RASGRF1,…
GO:BP	regulation of natural killer cell mediated cytotoxicity	GO:0042269	0.854584	0.0682451	41	601	7	18123	LGALS9,PIK3R6,HLA-F,HLA-B,KLRC2,HLA-A,STAT5B
GO:BP	natural killer cell mediated immunity	GO:0002228	0.936261	0.0286031	68	601	9	18123	LGALS9,CLEC2A,PIK3R6,SH2D1B,HLA-F,HLA-B,KLRC2,HLA-A,STAT5B
GO:BP	sarcomere organization	GO:0045214	0.996543	0.00150397	42	601	7	18123	KRT19,EDN1,PRKAR1A,CAV3,KRT8,SYNPO2L,ACTG1
GO:BP	regulation of nitric-oxide synthase biosynthetic process	GO:0051769	1	0	21	601	1	18123	EDN1
GO:BP	nitric-oxide synthase biosynthetic process	GO:0051767	1	0	21	601	1	18123	EDN1
GO:BP	actin crosslink formation	GO:0051764	1	0	14	601	1	18123	GAS2
GO:BP	regulation of cell cycle	GO:0051726	1	0	1120	601	37	18123	PPP1R9B,TAOK1,BRCA1,SOX9,ANKK1,EDN1,ANAPC11,TRIM37,PSMD12,TIMP2,DBF4B,PRKAR1A,RPTOR,DDX11,STAT3,CYP1A1,CCNJ,EME1,CDK3,PSMB10,PSMB3,PKHD1,GADD45B,RAD51C,RAD51D,SLC9A3R1,BECN1,CENPV,SPHK1,ANAPC2,TTLL12,AATF,CDK2AP2,STAT5B,PSMC5,RGCC,STXBP4
GO:BP	negative regulation of nitric-oxide synthase biosynthetic process	GO:0051771	1	0	5	601	1	18123	EDN1
GO:BP	response to redox state	GO:0051775	1	0	15	601	2	18123	ARHGDIA,RYR2
GO:BP	reproduction	GO:0000003	1	0	1515	601	69	18123	CLDN4,PPP1R9B,ITGB4,KRT19,LGALS9,NODAL,ADAM2,MROH2B,PSG5,PSG4,SPAG11A,SOX9,TAC4,GTSF1,RFX2,ZNF541,EDN1,BPTF,HSPA5,TTLL1,SPATA20,THRA,RAMP2,INSL3,PRKAR1A,ADAM28,FAM50A,ZNF35,PSG7,GPX4,IFT20,STAT3,KRT8,CYP1A1,WNT3,PRND,CCDC40,EME1,SLX4,MOV10L1,GRB2,PTAFR,LYZL4,MMP9,DKKL1,ABCC8,VPS13A,PSG9,MST1R,SYCE2,GAS2,RAD51C,RAD51D,CASP8,SUN5,CORIN,ALKBH5,CYP7B1,DUSP13,NPAS1,CYP17A1,TRPM2,KCNU1,SFRP2,PPP1R1B,EL…
GO:BP	regulation of nuclear division	GO:0051783	1	0	138	601	5	18123	EDN1,ANAPC11,PRKAR1A,SPHK1,RGCC
GO:BP	negative regulation of protein kinase B signaling	GO:0051898	1	0	64	601	4	18123	XDH,PPARA,PKHD1,SLC9A3R1
GO:BP	positive regulation of protein kinase B signaling	GO:0051897	1	0	192	601	9	18123	CCL19,CD19,GRB2,ICOS,MST1R,ERBB2,RAC2,CCR7,AKT2
GO:BP	regulation of protein kinase B signaling	GO:0051896	1	0	264	601	15	18123	CCL19,XDH,CAV3,CD19,PPARA,TPTE2,GRB2,ICOS,MST1R,PKHD1,SLC9A3R1,ERBB2,RAC2,CCR7,AKT2
GO:BP	regulation of focal adhesion assembly	GO:0051893	1	0	65	601	1	18123	ACTG1
GO:BP	killing of cells in other organism involved in symbiotic interaction	GO:0051883	1	0	31	601	2	18123	SPAG11A,APOL1
GO:BP	regulation of mitochondrial membrane potential	GO:0051881	1	0	75	601	2	18123	MAPT,AKT2
GO:BP	killing by host of symbiont cells	GO:0051873	1	0	29	601	2	18123	SPAG11A,APOL1
GO:BP	protein autoubiquitination	GO:0051865	1	0	75	601	5	18123	BRCA1,UHRF1,TRIM37,ASB4,RNF157
GO:BP	modulation by host of symbiont process	GO:0051851	1	0	65	601	3	18123	CCL5,IFI27,SMARCB1
GO:BP	cytolysis by host of symbiont cells	GO:0051838	1	0	10	601	2	18123	SPAG11A,APOL1
GO:BP	modulation of process of other organism involved in symbiotic interaction	GO:0051817	1	0	123	601	6	18123	CCL5,ULK2,KPNB1,IFI27,CASP8,SMARCB1
GO:BP	cytolysis in other organism involved in symbiotic interaction	GO:0051801	1	0	10	601	2	18123	SPAG11A,APOL1
GO:BP	negative regulation of hair follicle development	GO:0051799	1	0	6	601	1	18123	NGFR
GO:BP	positive regulation of hair follicle development	GO:0051798	1	0	11	601	1	18123	KRT17
GO:BP	regulation of hair follicle development	GO:0051797	1	0	18	601	2	18123	KRT17,NGFR
GO:BP	positive regulation of nuclear division	GO:0051785	1	0	57	601	4	18123	EDN1,ANAPC11,SPHK1,RGCC
GO:BP	negative regulation of nuclear division	GO:0051784	1	0	56	601	1	18123	PRKAR1A
GO:BP	positive regulation of cell division	GO:0051781	1	0	88	601	1	18123	CENPV
GO:BP	cellular response to stimulus	GO:0051716	1	0	7873	601	292	18123	COL1A1,MAPT,NR1D1,CHRND,PPP1R9B,GRAP,ZACN,CCL23,TNFRSF11B,ITGB4,KRT19,CCL19,LRPAP1,ZBP1,ITGA2B,IGFBP4,DUSP14,CCL5,TMEM199,LGALS9,P2RY13,CHN1,CHRNG,RASGEF1C,ERAP2,LRRC8E,CCL14,CCL15-CCL14,P2RY6,RASAL3,HLA-DRA,ELF3,MUC17,SOSTDC1,NODAL,CGN,CCL27,NME2,NOS1AP,ADRBK2,RSPO1,TAOK1,GRK4,GRN,ADAM2,MROH2B,LRRC59,KPTN,TMC8,CD79B,VIL1,BRCA1,FRRS1L,LBP,NRROS,ULK2,RNF43,CXCL2,TENC1,LGALS3BP,DAND5,P2RY14,SOX9,GP…
GO:BP	establishment of centrosome localization	GO:0051660	1	0	10	601	1	18123	PKHD1
GO:BP	regulation of killing of cells of other organism	GO:0051709	1	0	22	601	1	18123	CASP8
GO:BP	centrosome localization	GO:0051642	1	0	33	601	3	18123	IFT20,TMEM201,PKHD1
GO:BP	cellular localization	GO:0051641	1	0	3519	601	126	18123	COL1A1,MAPT,NR1D1,PPP1R9B,SLC5A3,CCL19,ITGA2B,FRMPD3,LGALS9,COPZ2,P2RY6,NME2,NOS1AP,KIF5C,GRN,SLC25A6,KPTN,VIL1,RPH3AL,SRSF1,RPH3A,LGALS3BP,NACAD,SOX9,GPC2,GHDC,VAT1,CROCC,ALDOC,CASC3,RAB34,TTR,LYZ,RPL38,NEFH,LLGL2,DCLK1,DGKI,SLC4A1,SLC1A2,RPL19,PLAC8,CCDC47,PSMD12,TIMP2,RAB43,HSPA5,PRKCG,GGH,PTGDS,NMT1,RAMP2,NXF3,MVB12A,EHD1,TMC6,GOSR1,CAV3,CD19,HLA-F,IFT20,TMEM201,STAT3,HLA-B,MCOLN2,GOSR2,KLRC2…
GO:BP	organelle localization	GO:0051640	1	0	657	601	25	18123	MAPT,LGALS9,KIF5C,CROCC,RAB34,NEFH,LLGL2,PTGDS,GOSR1,CAV3,TMEM201,GOSR2,KPNB1,UNC13A,KIF5A,PKHD1,WIPI1,FBF1,SLC9A3R1,LIN7A,BECN1,RAC2,ARF1,STXBP3,MYO15A
GO:BP	histamine transport	GO:0051608	1	0	15	601	1	18123	EDN1
GO:BP	defense response to virus	GO:0051607	1	0	269	601	7	18123	ZBP1,DHX58,SEC14L1,IFI27,BECN1,TSPAN32,IRF7
GO:BP	detection of stimulus	GO:0051606	1	0	689	601	20	18123	PDZD7,GRK4,LBP,TAC4,GNGT2,NMT1,LPO,CAV3,NPFFR2,RPE65,HLA-B,RFC2,JUP,NGFR,PIGR,HLA-A,OR8S1,PLEKHB1,RYR2,PPEF1
GO:BP	protein maturation	GO:0051604	1	0	303	601	11	18123	MYRF,NAA60,SPON1,TMEM98,TFR2,TSHB,CASP8,CORIN,TSPAN32,ADAMTS13,BCL2L12
GO:BP	Golgi localization	GO:0051645	1	0	14	601	1	18123	SLC9A3R1
GO:BP	proteolysis involved in cellular protein catabolic process	GO:0051603	1	0	760	601	25	18123	NR1D1,CLPP,RNF43,UBAP1L,ANAPC11,UHRF1,CCDC47,PSMD12,HSPA5,PRKCG,MVB12A,CAV3,SIRT6,UBE2Z,PSMB10,IFI27,PSMB3,RPL23,DCST1,CASP8,TRIM72,USP36,UBXN11,ANAPC2,PSMC5
GO:BP	response to hydrostatic pressure	GO:0051599	1	0	7	601	2	18123	KRT8,COL18A1
GO:BP	response to calcium ion	GO:0051592	1	0	152	601	7	18123	EDN1,HSPA5,TSHB,ADCY1,RASGRP2,TRPM2,RYR2
GO:BP	response to cAMP	GO:0051591	1	0	96	601	6	18123	COL1A1,HSPA5,PTAFR,SLC5A5,NME1,AKAP6
GO:BP	regulation of neurotransmitter transport	GO:0051588	1	0	106	601	4	18123	DGKI,PRKCG,ADCY1,ATP1A2
GO:BP	regulation of neurotransmitter uptake	GO:0051580	1	0	17	601	1	18123	ATP1A2
GO:BP	positive regulation of histone H3-K9 methylation	GO:0051574	1	0	11	601	1	18123	BRCA1
GO:BP	negative regulation of histone H3-K9 methylation	GO:0051573	1	0	12	601	2	18123	BRCA1,SMARCB1
GO:BP	response to electrical stimulus	GO:0051602	1	0	44	601	1	18123	RPE65
GO:BP	mitochondrion localization	GO:0051646	1	0	49	601	1	18123	MAPT
GO:BP	nucleus localization	GO:0051647	1	0	26	601	3	18123	CAV3,TMEM201,SLC9A3R1
GO:BP	vesicle localization	GO:0051648	1	0	228	601	8	18123	KIF5C,GOSR1,GOSR2,KIF5A,WIPI1,LIN7A,ARF1,MYO15A
GO:BP	response to other organism	GO:0051707	1	0	1600	601	76	18123	NR1D1,CCL23,CCL19,ZBP1,CCL5,LGALS9,CCL14,HLA-DRA,MUC17,GRN,VIL1,LBP,SPAG11A,CXCL2,CLEC2A,LYZ,MUC3A,EDN1,DCLK1,GALP,PIK3R6,SH2D1B,PLAC8,DHX58,PSMD12,RAB43,APOL1,BPIFA2,SEC14L1,KRT16,LPO,IFI35,HLA-F,HLA-B,KRT8,CYP1A1,GNLY,MCOLN2,TBKBP1,TAB1,KLRC2,ITGAM,LILRA5,PTAFR,PSMB10,ABCC8,IFI27,CXCL13,MUC20,PSMB3,STYK1,CXCL3,MST1R,HLA-A,DCST1,CASP8,HLA-DQB1,CXCL1,BECN1,CCL3L1,ARF1,STXBP3,CCR7,HDAC5,TTLL12,TSP…
GO:BP	multi-organism process	GO:0051704	1	0	1155	601	51	18123	CLDN4,PPP1R9B,ITGB4,LGALS9,NODAL,ADAM2,MROH2B,PSG5,PSG4,SPAG11A,SOX9,GTSF1,RFX2,ZNF541,EDN1,TTLL1,SPATA20,THRA,RAMP2,INSL3,PRKAR1A,MVB12A,ADAM28,FAM50A,ZNF35,PSG7,GPX4,IFT20,STAT3,CYP1A1,WNT3,PRND,KPNB1,MOV10L1,PTAFR,LYZL4,MMP9,DKKL1,ABCC8,PSG9,MST1R,GAS2,RAD51C,SUN5,CORIN,ALKBH5,DUSP13,KCNU1,PPP1R1B,ELSPBP1,STAT5B
GO:BP	biological process involved in intraspecies interaction between organisms	GO:0051703	1	0	53	601	3	18123	RPTOR,NLGN3,VPS13A
GO:BP	biological process involved in interaction with symbiont	GO:0051702	1	0	99	601	5	18123	CCL5,SPAG11A,APOL1,IFI27,SMARCB1
GO:BP	biological process involved in interaction with host	GO:0051701	1	0	243	601	5	18123	LGALS9,ULK2,KPNB1,GRB2,CASP8
GO:BP	pointed-end actin filament capping	GO:0051694	1	0	7	601	1	18123	TMOD4
GO:BP	actin filament capping	GO:0051693	1	0	44	601	4	18123	VIL1,ADD2,TMOD4,FLII
GO:BP	establishment of Golgi localization	GO:0051683	1	0	8	601	1	18123	SLC9A3R1
GO:BP	localization of cell	GO:0051674	1	0	1840	601	81	18123	COL1A1,CLDN4,PPP1R9B,CCL23,ITGB4,CCL19,ITGA2B,CCL5,LGALS9,CCL14,CCL15-CCL14,P2RY6,NODAL,CCL27,GRN,VIL1,UNK,LBP,CXCL2,ENPP2,LAMC3,SOX9,GPC2,TAC4,CCR8,EDN1,ARHGDIA,DCLK1,KIRREL3,NF1,FAT3,HSPA5,MAP2K3,ADD2,TTLL1,INSL3,SEMA6C,KRT16,FRMD5,TMEM201,STAT3,MCOLN2,CCDC40,ITGAM,TPTE2,CARD10,GRB2,PTAFR,MMP9,ABCC8,JUP,VPS13A,CXCL13,CXCL3,MST1R,MMP28,ARHGAP18,TWIST2,CYP7B1,SLC9A3R1,SLC7A6,CXCL1,ERBB2,RAC2,CCL3…
GO:BP	localization within membrane	GO:0051668	1	0	775	601	29	18123	PPP1R9B,SLC5A3,VIL1,NACAD,GPC2,RAB34,RPL38,SLC4A1,RPL19,CCDC47,HSPA5,NMT1,RAMP2,EHD1,CAV3,IFT20,ITGAM,STAC3,NACA2,JUP,RPL27,PIGR,RPL23,CASP8,SLC9A3R1,LIN7A,ERBB2,AKT2,TSPAN32
GO:BP	membrane depolarization	GO:0051899	1	0	89	601	5	18123	SCN4A,EDN1,CAV3,ATP1A2,CACNA1G
GO:BP	establishment of organelle localization	GO:0051656	1	0	443	601	20	18123	MAPT,LGALS9,KIF5C,CROCC,NEFH,LLGL2,PTGDS,GOSR1,TMEM201,GOSR2,KPNB1,KIF5A,PKHD1,WIPI1,SLC9A3R1,LIN7A,BECN1,RAC2,ARF1,MYO15A
GO:BP	establishment of mitochondrion localization	GO:0051654	1	0	27	601	1	18123	MAPT
GO:BP	spindle localization	GO:0051653	1	0	57	601	3	18123	LLGL2,KPNB1,PKHD1
GO:BP	maintenance of location in cell	GO:0051651	1	0	223	601	12	18123	CCL19,P2RY6,HSPA5,CD19,MCOLN2,VPS13A,ATP1A2,TRPM2,JPH1,AKAP6,CCR7,RYR2
GO:BP	establishment of vesicle localization	GO:0051650	1	0	212	601	8	18123	KIF5C,GOSR1,GOSR2,KIF5A,WIPI1,LIN7A,ARF1,MYO15A
GO:BP	establishment of localization in cell	GO:0051649	1	0	2778	601	108	18123	MAPT,NR1D1,CCL19,ITGA2B,FRMPD3,LGALS9,COPZ2,P2RY6,NME2,NOS1AP,KIF5C,GRN,SLC25A6,RPH3AL,SRSF1,RPH3A,LGALS3BP,NACAD,GHDC,VAT1,ALDOC,CASC3,TTR,LYZ,RPL38,NEFH,LLGL2,DCLK1,DGKI,SLC1A2,RPL19,PLAC8,PSMD12,TIMP2,RAB43,HSPA5,PRKCG,GGH,PTGDS,NMT1,RAMP2,NXF3,MVB12A,EHD1,TMC6,GOSR1,CAV3,CD19,HLA-F,IFT20,TMEM201,STAT3,HLA-B,MCOLN2,GOSR2,KLRC2,ITGAM,RNF157,KPNB1,NACA2,UNC13A,PTAFR,MMP9,NLGN3,IFI27,JUP,VPS13A,T…
GO:BP	cytolysis in other organism	GO:0051715	1	0	10	601	2	18123	SPAG11A,APOL1
GO:BP	sulfation	GO:0051923	1	0	26	601	1	18123	SULT2B1
GO:BP	positive regulation of nervous system development	GO:0051962	1	0	281	601	7	18123	MAPT,ARHGDIA,WNT3,NLGN3,NGFR,ANAPC2,PTPRD
GO:BP	negative regulation of calcium ion transport	GO:0051926	1	0	70	601	3	18123	SLN,CAV3,ATP1A2
GO:BP	monovalent inorganic anion homeostasis	GO:0055083	1	0	16	601	2	18123	SLC12A3,SLC12A9
GO:BP	anion homeostasis	GO:0055081	1	0	39	601	4	18123	SLC34A2,SLC12A3,SLC9A3R1,SLC12A9
GO:BP	sodium ion homeostasis	GO:0055078	1	0	57	601	4	18123	EDN1,CORIN,ATP1A2,SLC12A3
GO:BP	transition metal ion homeostasis	GO:0055076	1	0	143	601	10	18123	TMEM199,TMC8,EPB42,PRND,MT1M,TFR2,SLC46A1,ARF1,SLC39A5,TMPRSS6
GO:BP	potassium ion homeostasis	GO:0055075	1	0	32	601	3	18123	ATP1A2,SLC12A3,SLC12A9
GO:BP	calcium ion homeostasis	GO:0055074	1	0	471	601	26	18123	CCL23,CCL19,CCL5,CCL14,P2RY6,TAC4,CCR8,EDN1,CCDC47,CAV3,CD19,ATP2B1,MCOLN2,PTH1R,CD52,P2RY8,CDH23,CXCL13,PKHD1,ATP1A2,TRPM2,JPH1,AKAP6,CCR7,RYR2,MS4A1
GO:BP	iron ion homeostasis	GO:0055072	1	0	90	601	5	18123	TMEM199,EPB42,TFR2,SLC46A1,TMPRSS6
GO:BP	copper ion homeostasis	GO:0055070	1	0	19	601	2	18123	PRND,ARF1
GO:BP	zinc ion homeostasis	GO:0055069	1	0	39	601	3	18123	TMC8,MT1M,SLC39A5
GO:BP	monovalent inorganic cation homeostasis	GO:0055067	1	0	165	601	11	18123	CA7,TMEM199,GRN,SLC4A4,SLC9A5,EDN1,SLC4A1,CORIN,ATP1A2,SLC12A3,SLC12A9
GO:BP	metal ion homeostasis	GO:0055065	1	0	671	601	39	18123	CCL23,CCL19,CCL5,TMEM199,CCL14,P2RY6,TMC8,EPB42,TAC4,CCR8,EDN1,CCDC47,CAV3,CD19,ATP2B1,MCOLN2,PTH1R,PRND,MT1M,CD52,P2RY8,CDH23,CXCL13,TFR2,PKHD1,CORIN,SLC46A1,ATP1A2,SLC12A3,ARF1,TRPM2,JPH1,AKAP6,CCR7,SLC39A5,RYR2,MS4A1,SLC12A9,TMPRSS6
GO:BP	chloride ion homeostasis	GO:0055064	1	0	16	601	2	18123	SLC12A3,SLC12A9
GO:BP	phosphate ion homeostasis	GO:0055062	1	0	14	601	2	18123	SLC34A2,SLC9A3R1
GO:BP	positive regulation of cardiac muscle tissue growth	GO:0055023	1	0	46	601	2	18123	EDN1,AKAP6
GO:BP	negative regulation of cardiac muscle tissue growth	GO:0055022	1	0	32	601	2	18123	CAV3,PPARA
GO:BP	regulation of cardiac muscle tissue growth	GO:0055021	1	0	77	601	4	18123	EDN1,CAV3,PPARA,AKAP6
GO:BP	cardiac muscle tissue growth	GO:0055017	1	0	102	601	6	18123	EDN1,PRKAR1A,CAV3,SIRT6,PPARA,AKAP6
GO:BP	cardiac muscle cell development	GO:0055013	1	0	80	601	4	18123	EDN1,CAV3,PPARA,AKAP6
GO:BP	ventricular cardiac muscle tissue morphogenesis	GO:0055010	1	0	46	601	1	18123	RYR2
GO:BP	nucleobase-containing small molecule metabolic process	GO:0055086	1	0	628	601	16	18123	NME2,SULT2B1,SLC4A4,ALDOC,TTR,SLC4A1,AK7,XDH,STAT3,UQCC3,PAPSS2,PPARA,ACSM5,NT5C3B,ADCY1,NME1
GO:BP	cardiac muscle tissue morphogenesis	GO:0055008	1	0	60	601	2	18123	SIRT6,RYR2
GO:BP	lipid homeostasis	GO:0055088	1	0	169	601	5	18123	NR1D1,EHD1,CAV3,CYP7B1,ABCB4
GO:BP	response to hyperoxia	GO:0055093	1	0	23	601	2	18123	COL1A1,CYP1A1
GO:BP	neurofilament cytoskeleton organization	GO:0060052	1	0	8	601	1	18123	NEFH
GO:BP	cardiac muscle contraction	GO:0060048	1	0	139	601	7	18123	NOS1AP,MAP2K3,CAV3,JUP,ATP1A2,CACNA1G,RYR2
GO:BP	heart contraction	GO:0060047	1	0	282	601	13	18123	NOS1AP,KCND1,EDN1,MAP2K3,THRA,CAV3,ATP2B1,FXYD7,JUP,CORIN,ATP1A2,CACNA1G,RYR2
GO:BP	retina morphogenesis in camera-type eye	GO:0060042	1	0	62	601	4	18123	SOX9,FAT3,RPE65,SDK2
GO:BP	retina development in camera-type eye	GO:0060041	1	0	154	601	6	18123	LAMC3,SOX9,FAT3,RPE65,ATP2B1,SDK2
GO:BP	cardiac muscle cell proliferation	GO:0060038	1	0	66	601	1	18123	PRKAR1A
GO:BP	convergent extension involved in axis elongation	GO:0060028	1	0	6	601	1	18123	SFRP2
GO:BP	convergent extension	GO:0060026	1	0	16	601	1	18123	SFRP2
GO:BP	rhythmic synaptic transmission	GO:0060024	1	0	3	601	2	18123	EDN1,NLGN3
GO:BP	roof of mouth development	GO:0060021	1	0	87	601	1	18123	FRAS1
GO:BP	radial glial cell differentiation	GO:0060019	1	0	12	601	1	18123	STAT3
GO:BP	astrocyte fate commitment	GO:0060018	1	0	4	601	1	18123	SOX9
GO:BP	Sertoli cell development	GO:0060009	1	0	13	601	1	18123	SOX9
GO:BP	Sertoli cell differentiation	GO:0060008	1	0	19	601	1	18123	SOX9
GO:BP	digestive system development	GO:0055123	1	0	139	601	4	18123	NODAL,CYP1A1,CCDC40,SFRP2
GO:BP	relaxation of cardiac muscle	GO:0055119	1	0	17	601	1	18123	ATP1A2
GO:BP	regulation of cardiac muscle contraction	GO:0055117	1	0	79	601	4	18123	CAV3,JUP,ATP1A2,RYR2
GO:BP	obsolete oxidation-reduction process	GO:0055114	1	0	475	601	19	18123	DCXR,AIFM3,VAT1,DUS1L,SARDH,FMO3,FDXR,XDH,LPO,GPX4,PLOD3,RPE65,CYP1A1,CYP7B1,VAT1L,CYP3A7,CYP2C9,DHRS7B,CYP17A1
GO:BP	Golgi to transport vesicle transport	GO:0055108	1	0	1	601	1	18123	ARF1
GO:BP	sterol homeostasis	GO:0055092	1	0	100	601	4	18123	NR1D1,EHD1,CAV3,CYP7B1
GO:BP	cardiac muscle cell differentiation	GO:0055007	1	0	120	601	5	18123	EDN1,CAV3,IFT20,PPARA,AKAP6
GO:BP	cardiac cell development	GO:0055006	1	0	87	601	4	18123	EDN1,CAV3,PPARA,AKAP6
GO:BP	muscle cell development	GO:0055001	1	0	175	601	14	18123	KRT19,FER1L5,EDN1,RAMP2,PRKAR1A,CAV3,KRT8,SYNPO2L,STAC3,PPARA,TMOD4,AKAP6,FLII,ACTG1
GO:BP	regulation of synaptic transmission, glutamatergic	GO:0051966	1	0	72	601	4	18123	DGKI,UNC13A,NLGN3,ATP1A2
GO:BP	positive regulation of synapse assembly	GO:0051965	1	0	60	601	2	18123	NLGN3,PTPRD
GO:BP	regulation of synapse assembly	GO:0051963	1	0	100	601	2	18123	NLGN3,PTPRD
GO:BP	negative regulation of histone H3-K4 methylation	GO:0051572	1	0	6	601	1	18123	BRCA1
GO:BP	negative regulation of nervous system development	GO:0051961	1	0	151	601	8	18123	NR1D1,ARHGDIA,NF1,SEMA6C,WNT3,TMEM98,ABCC8,NGFR
GO:BP	regulation of nervous system development	GO:0051960	1	0	453	601	13	18123	MAPT,NR1D1,MYRF,ARHGDIA,NF1,SEMA6C,WNT3,NLGN3,TMEM98,ABCC8,NGFR,ANAPC2,PTPRD
GO:BP	methotrexate transport	GO:0051958	1	0	2	601	1	18123	SLC46A1
GO:BP	regulation of amino acid transport	GO:0051955	1	0	37	601	1	18123	ATP1A2
GO:BP	regulation of amine transport	GO:0051952	1	0	92	601	1	18123	ATP1A2
GO:BP	regulation of glutamate uptake involved in transmission of nerve impulse	GO:0051946	1	0	3	601	1	18123	ATP1A2
GO:BP	regulation of amino acid uptake involved in synaptic transmission	GO:0051941	1	0	3	601	1	18123	ATP1A2
GO:BP	gamma-aminobutyric acid import	GO:0051939	1	0	4	601	1	18123	SLC9A3R1
GO:BP	L-glutamate import	GO:0051938	1	0	15	601	2	18123	SLC1A2,ATP1A2
GO:BP	glutamate reuptake	GO:0051935	1	0	5	601	1	18123	ATP1A2
GO:BP	amino acid neurotransmitter reuptake	GO:0051933	1	0	9	601	1	18123	ATP1A2
GO:BP	synaptic transmission, GABAergic	GO:0051932	1	0	48	601	1	18123	CA7
GO:BP	regulation of sensory perception	GO:0051931	1	0	40	601	3	18123	TAC4,EDN1,PTAFR
GO:BP	regulation of sensory perception of pain	GO:0051930	1	0	39	601	3	18123	TAC4,EDN1,PTAFR
GO:BP	positive regulation of calcium ion transport	GO:0051928	1	0	126	601	8	18123	CCL5,P2RY6,CD19,ATP2B1,LILRA5,STAC3,AKAP6,RYR2
GO:BP	positive regulation of synaptic transmission, glutamatergic	GO:0051968	1	0	32	601	1	18123	NLGN3
GO:BP	regulation of telomerase activity	GO:0051972	1	0	51	601	1	18123	TEN1
GO:BP	negative regulation of telomerase activity	GO:0051974	1	0	14	601	1	18123	TEN1
GO:BP	regulation of chromosome segregation	GO:0051983	1	0	86	601	2	18123	ANAPC11,BECN1
GO:BP	cyclic purine nucleotide metabolic process	GO:0052652	1	0	22	601	1	18123	ADCY1
GO:BP	regulation of endopeptidase activity	GO:0052548	1	0	437	601	16	18123	MAPT,LGALS9,CPAMD8,NODAL,VIL1,TIMP2,XDH,STAT3,UBE2Z,MMP9,TNFSF15,NGFR,CASP8,SFRP2,NLRP12,BCL2L12
GO:BP	regulation of peptidase activity	GO:0052547	1	0	467	601	19	18123	MAPT,CLDN4,LGALS9,CPAMD8,NODAL,GRN,VIL1,TIMP2,XDH,STAT3,UBE2Z,MMP9,TNFSF15,NGFR,CASP8,PCOLCE,SFRP2,NLRP12,BCL2L12
GO:BP	modulation by symbiont of entry into host	GO:0052372	1	0	51	601	1	18123	LGALS9
GO:BP	phytoalexin metabolic process	GO:0052314	1	0	2	601	1	18123	DDC
GO:BP	modulation of molecular function in other organism involved in symbiotic interaction	GO:0052205	1	0	9	601	1	18123	CASP8
GO:BP	negative regulation of molecular function in other organism involved in symbiotic interaction	GO:0052204	1	0	7	601	1	18123	CASP8
GO:BP	modulation of catalytic activity in other organism involved in symbiotic interaction	GO:0052203	1	0	4	601	1	18123	CASP8
GO:BP	negative regulation of catalytic activity in other organism involved in symbiotic interaction	GO:0052199	1	0	3	601	1	18123	CASP8
GO:BP	regulation of calcium ion transport	GO:0051924	1	0	264	601	14	18123	SLN,CCL5,P2RY6,NOS1AP,RGS9,CAV3,CD19,ATP2B1,LILRA5,STAC3,ATP1A2,JPH1,AKAP6,RYR2
GO:BP	modulation by symbiont of host apoptotic process	GO:0052150	1	0	11	601	1	18123	CASP8
GO:BP	movement in host environment	GO:0052126	1	0	180	601	2	18123	LGALS9,GRB2
GO:BP	negative regulation by symbiont of host molecular function	GO:0052056	1	0	2	601	1	18123	CASP8
GO:BP	modulation by symbiont of host molecular function	GO:0052055	1	0	2	601	1	18123	CASP8
GO:BP	negative regulation by symbiont of host catalytic activity	GO:0052053	1	0	1	601	1	18123	CASP8
GO:BP	negative regulation by symbiont of host programmed cell death	GO:0052041	1	0	11	601	1	18123	CASP8
GO:BP	modulation by symbiont of host programmed cell death	GO:0052040	1	0	15	601	1	18123	CASP8
GO:BP	regulation of attachment of spindle microtubules to kinetochore	GO:0051988	1	0	14	601	1	18123	BECN1
GO:BP	positive regulation of attachment of spindle microtubules to kinetochore	GO:0051987	1	0	6	601	1	18123	BECN1
GO:BP	positive regulation of chromosome segregation	GO:0051984	1	0	13	601	1	18123	BECN1
GO:BP	modulation by symbiont of host catalytic activity	GO:0052148	1	0	1	601	1	18123	CASP8
GO:BP	positive regulation of histone H3-K4 methylation	GO:0051571	1	0	19	601	1	18123	BRCA1
GO:BP	positive regulation of cytosolic calcium ion concentration involved in phospholipase C-activating G protein-coupled signaling pathway	GO:0051482	1	0	33	601	2	18123	EDN1,P2RY8
GO:BP	regulation of histone H3-K4 methylation	GO:0051569	1	0	30	601	1	18123	BRCA1
GO:BP	negative regulation of binding	GO:0051100	1	0	160	601	6	18123	CCL23,SLN,LRPAP1,TMC8,DDX11,PPARA
GO:BP	positive regulation of binding	GO:0051099	1	0	175	601	6	18123	SPON1,ADD2,RAMP2,DDX11,MMP9,NME1
GO:BP	regulation of binding	GO:0051098	1	0	364	601	13	18123	CCL23,SLN,LRPAP1,TMC8,GREM2,SPON1,ADD2,RAMP2,DDX11,PPARA,MMP9,NME1,HDAC5
GO:BP	positive regulation of developmental process	GO:0051094	1	0	1354	601	53	18123	COL1A1,MAPT,CCL19,KRT17,LGALS9,HLA-DRA,NODAL,NME2,GRN,SULT2B1,VIL1,BRCA1,ENPP2,SOX9,EDN1,ARHGDIA,PIK3R6,TIMP2,GPR21,RAMP2,EHD1,CAV3,ASB4,SIRT6,STAT3,WIF1,ATP2B1,WNT3,RNF157,UNC13A,NLGN3,DKKL1,JUP,ADIG,NGFR,IL7,TSHR,HOXB7,IQGAP3,CASP8,SH3GL3,KAT7,ARF1,SFRP2,SPHK1,AKAP6,ANAPC2,ANGPT4,PTPRD,STAT5B,SOCS3,RGCC,PREX1
GO:BP	negative regulation of developmental process	GO:0051093	1	0	984	601	34	18123	MAPT,NR1D1,TNFRSF11B,SOSTDC1,NODAL,NME2,DAND5,SOX9,VAT1,TLL2,ARHGDIA,NF1,PLAC8,FAT3,XDH,SEMA6C,CAV3,STAT3,WNT3,PPARA,MMP9,TMEM98,ABCC8,NGFR,TWIST2,TRIM72,ERBB2,NME1,SFRP2,HDAC5,ANGPT4,STAT5B,RGCC,BCL2L12
GO:BP	positive regulation of NF-kappaB transcription factor activity	GO:0051092	1	0	164	601	6	18123	LGALS9,TRIM37,STAT3,TAB1,RIPK4,SPHK1
GO:BP	positive regulation of DNA-binding transcription factor activity	GO:0051091	1	0	272	601	13	18123	LGALS9,NODAL,EDN1,TRIM37,STAT3,TAB1,RIPK4,JUP,ADCY1,SPHK1,HDAC5,SMARCB1,RGCC
GO:BP	regulation of DNA-binding transcription factor activity	GO:0051090	1	0	457	601	16	18123	LGALS9,NODAL,EDN1,TRIM37,NWD1,STAT3,TAB1,RIPK4,JUP,PKHD1,ADCY1,SPHK1,NLRP12,HDAC5,SMARCB1,RGCC
GO:BP	chaperone cofactor-dependent protein refolding	GO:0051085	1	0	31	601	2	18123	HSPA5,DNAJC7
GO:BP	'de novo' posttranslational protein folding	GO:0051084	1	0	36	601	2	18123	HSPA5,DNAJC7
GO:BP	negative regulation of small GTPase mediated signal transduction	GO:0051058	1	0	58	601	2	18123	RASAL3,TIMP2
GO:BP	positive regulation of small GTPase mediated signal transduction	GO:0051057	1	0	83	601	6	18123	LRRC59,DGKI,RASGRF1,SYNPO2L,GRB2,P2RY8
GO:BP	regulation of small GTPase mediated signal transduction	GO:0051056	1	0	329	601	19	18123	CHN1,RASAL3,LRRC59,FGD2,CHN2,ARHGDIA,DGKI,TIMP2,RASGRF1,CYTH3,SYNPO2L,GRB2,P2RY8,MYO9B,ARHGAP18,RAC2,STARD13,ARHGAP39,PREX1
GO:BP	negative regulation of lipid biosynthetic process	GO:0051055	1	0	63	601	3	18123	BRCA1,DKKL1,SPHK1
GO:BP	positive regulation of DNA metabolic process	GO:0051054	1	0	201	601	7	18123	BRCA1,PRKCG,DDX11,SIRT6,SLX4,RFC2,RGCC
GO:BP	negative regulation of DNA metabolic process	GO:0051053	1	0	154	601	4	18123	TEN1,POLR2E,SLX4,PAM16
GO:BP	regulation of DNA metabolic process	GO:0051052	1	0	389	601	12	18123	TEN1,BRCA1,POLR2E,PRKCG,DDX11,SIRT6,SLX4,RFC2,PAM16,KAT7,MBD3,RGCC
GO:BP	negative regulation of transport	GO:0051051	1	0	487	601	15	18123	SLN,LRPAP1,LGALS9,FER1L5,EDN1,WNK2,CAV3,HLA-F,MMP9,ABCC8,ATP1A2,SLC9A3R1,SH3GL3,STXBP3,AKT2
GO:BP	positive regulation of transport	GO:0051050	1	0	951	601	38	18123	CCL19,CCL5,P2RY6,NOS1AP,RPH3AL,EDN1,SLC1A2,NMT1,EHD1,WNK2,RGS9,CAV3,CD19,HLA-F,ATP2B1,KLRC2,ITGAM,LILRA5,STAC3,PTAFR,NLGN3,ABCC8,JUP,TFR2,LMAN2,CASP8,SLC9A3R1,ERBB2,RAC2,USP36,ARF1,TRPM2,CACNA1G,AKAP6,AKT2,RYR2,ABCB4,RGCC
GO:BP	regulation of DNA binding	GO:0051101	1	0	120	601	2	18123	MMP9,NME1
GO:BP	RNA polymerase II preinitiation complex assembly	GO:0051123	1	0	38	601	2	18123	THRA,PSMC5
GO:BP	regulation of actin nucleation	GO:0051125	1	0	31	601	2	18123	VIL1,ARF1
GO:BP	regulation of cellular component organization	GO:0051128	1	0	2439	601	92	18123	MAPT,PPP1R9B,SLN,CCL19,LRPAP1,IGFBP4,KRT17,CHN1,CCL27,NME2,RSPO1,TAOK1,GRN,TMC8,TEN1,VIL1,BRCA1,ENPP2,SOX9,GPC2,VAT1,CROCC,EDN1,ANAPC11,ARHGDIA,TRIM37,FAT3,H3F3B,HSPA5,ADD2,NMT1,THRA,PRKAR1A,SEMA6C,ATP10A,RPTOR,DDX11,EHD1,CAV3,IFT20,SIRT6,WNT3,TADA2A,SYNPO2L,TBCD,PPARA,RNF157,SLX4,GRB2,UNC13A,MMP9,NLGN3,ABCC8,CXCL13,TFR2,PAM16,TMOD4,RABEP2,NGFR,PKHD1,ARHGAP18,IQGAP3,CASP8,ERBB2,BECN1,RASGRP2,RAC2…
GO:BP	nuclear transport	GO:0051169	1	0	356	601	9	18123	SRSF1,CASC3,NXF3,STAT3,KPNB1,IFI27,JUP,RPL23,ALKBH5
GO:BP	nuclear export	GO:0051168	1	0	202	601	5	18123	SRSF1,CASC3,NXF3,IFI27,ALKBH5
GO:BP	xylulose 5-phosphate metabolic process	GO:0051167	1	0	5	601	1	18123	DCXR
GO:BP	glucose 6-phosphate metabolic process	GO:0051156	1	0	26	601	1	18123	PGLS
GO:BP	positive regulation of striated muscle cell differentiation	GO:0051155	1	0	59	601	3	18123	EDN1,CAV3,AKAP6
GO:BP	negative regulation of striated muscle cell differentiation	GO:0051154	1	0	40	601	4	18123	CAV3,PPARA,TRIM72,HDAC5
GO:BP	regulation of striated muscle cell differentiation	GO:0051153	1	0	102	601	6	18123	EDN1,CAV3,PPARA,TRIM72,AKAP6,HDAC5
GO:BP	positive regulation of muscle cell differentiation	GO:0051149	1	0	101	601	3	18123	EDN1,CAV3,AKAP6
GO:BP	negative regulation of muscle cell differentiation	GO:0051148	1	0	70	601	4	18123	CAV3,PPARA,TRIM72,HDAC5
GO:BP	regulation of transport	GO:0051049	1	0	1839	601	68	18123	NR1D1,LGI3,SLN,CA7,CCL19,LRPAP1,CCL5,LGALS9,P2RY6,NOS1AP,RSPO1,SCN4A,KCND1,RPH3AL,FER1L5,EDN1,NEFH,LLGL2,DGKI,SLC1A2,KCNAB3,PRKCG,RASGRF1,NMT1,EHD1,WNK2,RGS9,CAV3,CD19,HLA-F,ATP2B1,KLRC2,ITGAM,LILRA5,STAC3,PPARA,FXYD7,PTAFR,MMP9,NLGN3,ABCC8,IFI27,JUP,TFR2,LMAN2,ADCY1,CASP8,CORIN,ATP1A2,SLC9A3R1,ERBB2,RAC2,SH3GL3,USP36,ARF1,TRPM2,KCNU1,JPH1,SPHK1,CACNA1G,AKAP6,STXBP3,AKT2,RYR2,ABCB4,RGCC,ACTG1,STX…
GO:BP	regulation of muscle cell differentiation	GO:0051147	1	0	179	601	6	18123	EDN1,CAV3,PPARA,TRIM72,AKAP6,HDAC5
GO:BP	smooth muscle cell differentiation	GO:0051145	1	0	81	601	2	18123	SOX9,RAMP2
GO:BP	positive regulation of NK T cell proliferation	GO:0051142	1	0	4	601	1	18123	RASAL3
GO:BP	regulation of NK T cell proliferation	GO:0051140	1	0	5	601	1	18123	RASAL3
GO:BP	positive regulation of NK T cell activation	GO:0051135	1	0	7	601	1	18123	RASAL3
GO:BP	regulation of NK T cell activation	GO:0051133	1	0	9	601	1	18123	RASAL3
GO:BP	NK T cell activation	GO:0051132	1	0	11	601	1	18123	RASAL3
GO:BP	chaperone-mediated protein complex assembly	GO:0051131	1	0	23	601	1	18123	PTGES3L
GO:BP	positive regulation of cellular component organization	GO:0051130	1	0	1189	601	49	18123	MAPT,SLN,CCL19,CCL27,NME2,GRN,VIL1,BRCA1,ENPP2,SOX9,GPC2,CROCC,EDN1,ANAPC11,ARHGDIA,H3F3B,HSPA5,NMT1,ATP10A,DDX11,EHD1,CAV3,SIRT6,WNT3,SYNPO2L,SLX4,GRB2,MMP9,NLGN3,ABCC8,CXCL13,TFR2,NGFR,CASP8,BECN1,RAC2,NME1,KAT7,PIP4K2B,ARF1,SPHK1,ANAPC2,CCR7,AKT2,ABCB4,PTPRD,PSMC5,SMARCB1,RGCC
GO:BP	negative regulation of cellular component organization	GO:0051129	1	0	760	601	30	18123	MAPT,SLN,LRPAP1,TAOK1,TMC8,TEN1,VIL1,BRCA1,SOX9,VAT1,ARHGDIA,TRIM37,FAT3,HSPA5,ADD2,THRA,PRKAR1A,SEMA6C,CAV3,WNT3,TBCD,SLX4,PAM16,TMOD4,NGFR,BECN1,SH3GL3,PRKCSH,FLII,SMARCB1
GO:BP	striated muscle cell differentiation	GO:0051146	1	0	285	601	17	18123	KRT19,FER1L5,EDN1,PRKAR1A,EHD1,CAV3,IFT20,KRT8,SYNPO2L,STAC3,PPARA,TMOD4,TRIM72,AKAP6,HDAC5,FLII,ACTG1
GO:BP	negative regulation of secretion	GO:0051048	1	0	178	601	5	18123	LGALS9,EDN1,HLA-F,ABCC8,STXBP3
GO:BP	positive regulation of secretion	GO:0051047	1	0	315	601	11	18123	RPH3AL,EDN1,HLA-F,KLRC2,ITGAM,PTAFR,TFR2,ARF1,TRPM2,CACNA1G,RGCC
GO:BP	regulation of secretion	GO:0051046	1	0	650	601	25	18123	NR1D1,LGI3,CCL5,LGALS9,RPH3AL,EDN1,LLGL2,DGKI,PRKCG,HLA-F,KLRC2,ITGAM,PTAFR,ABCC8,TFR2,ADCY1,CORIN,SLC9A3R1,RAC2,ARF1,TRPM2,CACNA1G,STXBP3,RGCC,STXBP4
GO:BP	positive chemotaxis	GO:0050918	1	0	68	601	1	18123	CCL5
GO:BP	sensory perception of bitter taste	GO:0050913	1	0	44	601	2	18123	LPO,PIGR
GO:BP	detection of chemical stimulus involved in sensory perception of taste	GO:0050912	1	0	46	601	2	18123	LPO,PIGR
GO:BP	detection of chemical stimulus involved in sensory perception of smell	GO:0050911	1	0	398	601	1	18123	OR8S1
GO:BP	detection of mechanical stimulus involved in sensory perception of sound	GO:0050910	1	0	16	601	1	18123	PDZD7
GO:BP	sensory perception of taste	GO:0050909	1	0	67	601	2	18123	LPO,PIGR
GO:BP	detection of light stimulus involved in visual perception	GO:0050908	1	0	21	601	1	18123	RPE65
GO:BP	detection of chemical stimulus involved in sensory perception	GO:0050907	1	0	447	601	3	18123	LPO,PIGR,OR8S1
GO:BP	detection of stimulus involved in sensory perception	GO:0050906	1	0	514	601	7	18123	PDZD7,TAC4,LPO,RPE65,PIGR,OR8S1,PPEF1
GO:BP	negative chemotaxis	GO:0050919	1	0	47	601	2	18123	LRTM1,SEMA6C
GO:BP	neuromuscular process	GO:0050905	1	0	151	601	7	18123	CHRND,ANKFN1,SCN4A,CAV3,STAC3,CDH23,NPAS1
GO:BP	response to stimulus	GO:0050896	1	0	9487	601	339	18123	HSPB3,COL1A1,MAPT,NR1D1,CHRND,CLDN4,ADAMDEC1,PPP1R9B,GRAP,PDZD7,ZACN,SGCA,CCL23,TNFRSF11B,ITGB4,KRT19,DLEC1,CCL19,LRPAP1,ZBP1,ITGA2B,IGFBP4,FRMPD3,ANKFN1,DUSP14,CCL5,TMEM199,LGALS9,P2RY13,CHN1,CHRNG,RASGEF1C,ERAP2,SP2,LRRC8E,CCL14,CCL15-CCL14,P2RY6,RASAL3,HLA-DRA,ELF3,MUC17,SOSTDC1,NODAL,CGN,CCL27,NME2,NOS1AP,ADRBK2,KIF5C,RSPO1,TAOK1,GRK4,GRN,ADAM2,MROH2B,LRRC59,KPTN,TMC8,CD79B,VIL1,RPH3AL,BRCA1,…
GO:BP	intestinal absorption	GO:0050892	1	0	41	601	2	18123	VIL1,SLC46A1
GO:BP	multicellular organismal water homeostasis	GO:0050891	1	0	75	601	4	18123	CLDN4,PRKAR1A,KRT16,ADCY1
GO:BP	cognition	GO:0050890	1	0	297	601	15	18123	MAPT,PPP1R9B,HLA-DRA,JAKMIP1,DGKI,NF1,PRKCG,RASGRF1,THRA,IFT20,NLGN3,ABCC8,ADCY1,ATP1A2,PPP1R1B
GO:BP	endocrine process	GO:0050886	1	0	84	601	2	18123	EDN1,CORIN
GO:BP	neuromuscular process controlling balance	GO:0050885	1	0	51	601	2	18123	ANKFN1,CDH23
GO:BP	musculoskeletal movement	GO:0050881	1	0	56	601	4	18123	CHRND,SCN4A,CAV3,STAC3
GO:BP	multicellular organismal movement	GO:0050879	1	0	56	601	4	18123	CHRND,SCN4A,CAV3,STAC3
GO:BP	regulation of body fluid levels	GO:0050878	1	0	519	601	24	18123	COL1A1,CLDN4,ITGA2B,EDN1,DGKI,SLC4A1,PIK3R6,H3F3B,XDH,PRKCG,PRKAR1A,KRT16,AKAP10,EHD1,RAD51C,ADCY1,F13A1,NME1,PEAR1,STXBP3,TSPAN32,STAT5B,ADAMTS13,ACTG1
GO:BP	leukocyte tethering or rolling	GO:0050901	1	0	31	601	2	18123	ADD2,PTAFR
GO:BP	import into nucleus	GO:0051170	1	0	174	601	4	18123	STAT3,KPNB1,JUP,RPL23
GO:BP	regulation of chemotaxis	GO:0050920	1	0	228	601	12	18123	CCL19,CCL5,LGALS9,CCL27,LBP,EDN1,SEMA6C,WNT3,CXCL13,MMP28,RAC2,CCR7
GO:BP	negative regulation of chemotaxis	GO:0050922	1	0	65	601	4	18123	SEMA6C,WNT3,CXCL13,MMP28
GO:BP	negative regulation of membrane protein ectodomain proteolysis	GO:0051045	1	0	8	601	1	18123	TIMP2
GO:BP	regulation of membrane protein ectodomain proteolysis	GO:0051043	1	0	24	601	1	18123	TIMP2
GO:BP	mRNA transport	GO:0051028	1	0	151	601	7	18123	KIF5C,SRSF1,CASC3,NXF3,IGF2BP1,ALKBH5,IGF2BP2
GO:BP	actin filament bundle assembly	GO:0051017	1	0	161	601	5	18123	VIL1,ADD2,SYNPO2L,RGCC,ACTG1
GO:BP	barbed-end actin filament capping	GO:0051016	1	0	29	601	3	18123	VIL1,ADD2,FLII
GO:BP	actin filament severing	GO:0051014	1	0	17	601	2	18123	VIL1,FLII
GO:BP	negative regulation of nitric-oxide synthase activity	GO:0051001	1	0	15	601	2	18123	CAV3,NOSIP
GO:BP	positive regulation of nitric-oxide synthase activity	GO:0051000	1	0	23	601	1	18123	NOS1AP
GO:BP	regulation of nitric-oxide synthase activity	GO:0050999	1	0	54	601	3	18123	NOS1AP,CAV3,NOSIP
GO:BP	positive regulation of chemotaxis	GO:0050921	1	0	143	601	9	18123	CCL19,CCL5,LGALS9,CCL27,LBP,EDN1,CXCL13,RAC2,CCR7
GO:BP	positive regulation of lipid catabolic process	GO:0050996	1	0	27	601	2	18123	PPARA,AKT2
GO:BP	detection of mechanical stimulus	GO:0050982	1	0	52	601	3	18123	PDZD7,CAV3,JUP
GO:BP	detection of mechanical stimulus involved in sensory perception	GO:0050974	1	0	34	601	1	18123	PDZD7
GO:BP	detection of temperature stimulus involved in sensory perception of pain	GO:0050965	1	0	17	601	1	18123	TAC4
GO:BP	detection of light stimulus involved in sensory perception	GO:0050962	1	0	21	601	1	18123	RPE65
GO:BP	detection of temperature stimulus involved in sensory perception	GO:0050961	1	0	20	601	1	18123	TAC4
GO:BP	equilibrioception	GO:0050957	1	0	9	601	2	18123	ANKFN1,CDH23
GO:BP	sensory perception of mechanical stimulus	GO:0050954	1	0	176	601	8	18123	COL1A1,GRAP,PDZD7,RPL38,TECTA,CDH23,SLC9A3R1,MYO15A
GO:BP	sensory perception of light stimulus	GO:0050953	1	0	218	601	9	18123	COL1A1,CRYBA4,CRYGA,LAMC3,RGS9,RPE65,COL18A1,CDH23,ARR3
GO:BP	sensory perception of temperature stimulus	GO:0050951	1	0	27	601	1	18123	TAC4
GO:BP	regulation of lipid catabolic process	GO:0050994	1	0	60	601	3	18123	THRA,PPARA,AKT2
GO:BP	regulation of nitrogen compound metabolic process	GO:0051171	1	0	5886	601	161	18123	COL1A1,MAPT,NR1D1,EIF1,CLDN4,UBTF,PPP1R9B,ZNF341,CCL19,DUSP14,CCL5,KRT17,LGALS9,NSRP1,SP2,ELF3,CPAMD8,MYRF,NODAL,NME2,NOS1AP,RSPO1,TAOK1,GRN,TEN1,VIL1,UNK,BRCA1,ZNF529,SRSF1,SAP30BP,SLC4A4,ENPP2,DAND5,SOX9,FGD2,CTIF,RFX2,POLR2E,ZNF682,CASC3,ZNF541,EDN1,RPL38,MYT1L,SLC4A1,UHRF1,PIK3R6,NF1,SPON1,PLAC8,TRIM37,PSMD12,BPTF,TIMP2,H3F3B,HSPA5,XDH,MAP2K3,PRKCG,NWD1,DBF4B,ZNF710,THRA,PRKAR1A,IGF2BP1,RPTOR…
GO:BP	negative regulation of nitrogen compound metabolic process	GO:0051172	1	0	2592	601	76	18123	MAPT,NR1D1,PPP1R9B,DUSP14,SP2,ELF3,CPAMD8,NODAL,TEN1,VIL1,UNK,BRCA1,ZNF529,SOX9,POLR2E,ZNF541,EDN1,MYT1L,SLC4A1,UHRF1,NF1,SPON1,TRIM37,BPTF,TIMP2,H3F3B,XDH,PRKCG,THRA,PRKAR1A,IGF2BP1,RPTOR,MBTD1,SMARCE1,SUPT4H1,CAV3,SIRT6,STAT3,UBE2Z,ITGAM,PPARA,SLX4,MMP9,TMEM98,IFI27,PAM16,NGFR,NT5C3B,ZBTB26,DHX34,GADD45B,RPL23,TWIST2,PATL1,BANP,GPS1,IGF2BP2,KAT7,NPAS1,CENPV,EZH1,SFRP2,MBD3,SPHK1,NLRP12,HDAC5,AA…
GO:BP	positive regulation of nitrogen compound metabolic process	GO:0051173	1	0	3143	601	94	18123	COL1A1,MAPT,NR1D1,CLDN4,UBTF,ZNF341,CCL19,CCL5,KRT17,LGALS9,ELF3,MYRF,NODAL,NME2,NOS1AP,RSPO1,TAOK1,GRN,BRCA1,SRSF1,SLC4A4,ENPP2,SOX9,FGD2,CTIF,EDN1,UHRF1,PIK3R6,SPON1,PLAC8,TRIM37,BPTF,HSPA5,XDH,MAP2K3,PRKCG,DBF4B,THRA,PRKAR1A,RPTOR,DDX11,SMARCE1,SUPT4H1,CAV3,SIRT6,STAT3,ZNF780B,TADA2A,TAB1,MIF4GD,LILRA5,PPARA,ARNT2,SLX4,CARD10,PTAFR,MMP9,TNFSF15,RFC2,JUP,MUC20,TFR2,CAND2,MST1R,NGFR,NT5C3B,HOXB7…
GO:BP	regulation of nerve growth factor receptor activity	GO:0051394	1	0	1	601	1	18123	CAV3
GO:BP	response to mineralocorticoid	GO:0051385	1	0	36	601	3	18123	EDN1,ATP2B1,RPL27
GO:BP	response to glucocorticoid	GO:0051384	1	0	149	601	3	18123	EDN1,ATP2B1,PTAFR
GO:BP	negative regulation of oxidoreductase activity	GO:0051354	1	0	39	601	3	18123	SLC4A1,CAV3,NOSIP
GO:BP	positive regulation of oxidoreductase activity	GO:0051353	1	0	58	601	2	18123	NOS1AP,EDN1
GO:BP	negative regulation of lyase activity	GO:0051350	1	0	26	601	1	18123	P2RY13
GO:BP	positive regulation of lyase activity	GO:0051349	1	0	22	601	2	18123	NF1,TIMP2
GO:BP	negative regulation of transferase activity	GO:0051348	1	0	314	601	14	18123	MAPT,DUSP14,TEN1,NF1,PRKAR1A,RPTOR,CAV3,GADD45B,RPL23,GPS1,PIP4K2B,SFRP2,PPP1R1B,SOCS3
GO:BP	positive regulation of transferase activity	GO:0051347	1	0	690	601	26	18123	MAPT,CCL19,CCL5,TAOK1,FGD2,EDN1,PIK3R6,MAP2K3,DBF4B,PRKAR1A,RPTOR,CD19,TAB1,LILRA5,CARD10,TNFSF15,RFC2,MUC20,MST1R,GADD45B,IQGAP3,ADCY1,ERBB2,CCR7,ANGPT4,RGCC
GO:BP	neuron apoptotic process	GO:0051402	1	0	251	601	7	18123	GRN,NF1,HSPA5,PRKCG,ITGAM,NGFR,AKT2
GO:BP	negative regulation of hydrolase activity	GO:0051346	1	0	456	601	14	18123	PPP1R9B,CPAMD8,VIL1,DGKI,TSKS,TIMP2,UBE2Z,MMP9,NGFR,GPS1,SFRP2,PPP1R27,PPP1R1B,BCL2L12
GO:BP	regulation of lyase activity	GO:0051339	1	0	50	601	4	18123	P2RY13,NF1,TIMP2,NPFFR2
GO:BP	regulation of transferase activity	GO:0051338	1	0	1036	601	41	18123	MAPT,CCL19,DUSP14,CCL5,TAOK1,TEN1,FGD2,EDN1,PIK3R6,NF1,MAP2K3,DBF4B,PRKAR1A,RPTOR,CAV3,NPFFR2,CD19,CCNJ,TRPT1,TAB1,LILRA5,CARD10,TNFSF15,RFC2,MUC20,MST1R,GADD45B,RPL23,IQGAP3,ADCY1,GPS1,SLC9A3R1,ERBB2,RAC2,PIP4K2B,SFRP2,CCR7,ANGPT4,PPP1R1B,SOCS3,RGCC
GO:BP	regulation of hydrolase activity	GO:0051336	1	0	1252	601	60	18123	MAPT,CLDN4,PPP1R9B,CCL23,CCL19,CCL5,LGALS9,CHN1,CCL14,P2RY6,RASAL3,CPAMD8,NODAL,GRN,VIL1,FGD2,CHN2,ARHGDIA,LLGL2,DGKI,TSKS,NF1,TIMP2,XDH,RASGRF1,DDX11,RGS9,RINL,STAT3,UBE2Z,TBCD,PTAFR,MMP9,TNFSF15,CXCL13,RABEP2,NGFR,MYO9B,ARHGAP18,IQGAP3,CASP8,GPS1,PCOLCE,ERBB2,RASGRP2,CCL3L1,TBC1D3,STARD13,SFRP2,RUNDC1,NLRP12,CCR7,AKT2,PPP1R27,PPP1R1B,DOCK8,ARHGAP39,PREX1,BCL2L12,TBC1D3H
GO:BP	meiotic cell cycle	GO:0051321	1	0	259	601	8	18123	PRKAR1A,EME1,SLX4,MOV10L1,SYCE2,RAD51C,RAD51D,DUSP13
GO:BP	attachment of mitotic spindle microtubules to kinetochore	GO:0051315	1	0	15	601	1	18123	BECN1
GO:BP	metaphase plate congression	GO:0051310	1	0	65	601	2	18123	KPNB1,BECN1
GO:BP	meiotic chromosome separation	GO:0051307	1	0	25	601	2	18123	EME1,SLX4
GO:BP	mitotic sister chromatid separation	GO:0051306	1	0	65	601	1	18123	ANAPC11
GO:BP	chromosome movement towards spindle pole	GO:0051305	1	0	7	601	1	18123	KPNB1
GO:BP	regulation of oxidoreductase activity	GO:0051341	1	0	116	601	5	18123	NOS1AP,EDN1,SLC4A1,CAV3,NOSIP
GO:BP	chromosome separation	GO:0051304	1	0	95	601	3	18123	ANAPC11,EME1,SLX4
GO:BP	stress-activated MAPK cascade	GO:0051403	1	0	274	601	12	18123	CCL19,LGALS9,TAOK1,XDH,MAP2K3,CAV3,TAB1,GADD45B,GPS1,SFRP2,SPHK1,CCR7
GO:BP	regulation of ubiquitin-protein transferase activity	GO:0051438	1	0	58	601	1	18123	RPL23
GO:BP	histone H3-K4 methylation	GO:0051568	1	0	59	601	1	18123	BRCA1
GO:BP	histone H3-K9 methylation	GO:0051567	1	0	38	601	2	18123	BRCA1,SMARCB1
GO:BP	positive regulation of keratinocyte migration	GO:0051549	1	0	12	601	1	18123	MMP9
GO:BP	regulation of keratinocyte migration	GO:0051547	1	0	14	601	1	18123	MMP9
GO:BP	keratinocyte migration	GO:0051546	1	0	19	601	2	18123	KRT16,MMP9
GO:BP	adenine nucleotide transport	GO:0051503	1	0	28	601	3	18123	LRRC8E,SLC25A42,SLC25A6
GO:BP	positive regulation of stress fiber assembly	GO:0051496	1	0	54	601	2	18123	SYNPO2L,RGCC
GO:BP	positive regulation of cytoskeleton organization	GO:0051495	1	0	232	601	10	18123	MAPT,CCL27,VIL1,EDN1,CAV3,SYNPO2L,GRB2,ARF1,CCR7,RGCC
GO:BP	negative regulation of cytoskeleton organization	GO:0051494	1	0	169	601	9	18123	TAOK1,VIL1,BRCA1,TRIM37,ADD2,CAV3,TBCD,TMOD4,FLII
GO:BP	response to corticosterone	GO:0051412	1	0	22	601	1	18123	ATP2B1
GO:BP	regulation of cytoskeleton organization	GO:0051493	1	0	535	601	26	18123	MAPT,CCL27,TAOK1,VIL1,BRCA1,EDN1,ARHGDIA,TRIM37,ADD2,CAV3,SYNPO2L,TBCD,GRB2,TMOD4,ARHGAP18,IQGAP3,RAC2,ARF1,SKA2,TRPM2,CCR7,CDK2AP2,FLII,RGCC,PREX1,ACTG1
GO:BP	positive regulation of filopodium assembly	GO:0051491	1	0	30	601	1	18123	CCR7
GO:BP	regulation of filopodium assembly	GO:0051489	1	0	48	601	2	18123	TRPM2,CCR7
GO:BP	negative regulation of cytosolic calcium ion concentration	GO:0051481	1	0	14	601	2	18123	ATP2B1,ATP1A2
GO:BP	regulation of cytosolic calcium ion concentration	GO:0051480	1	0	359	601	21	18123	CCL19,P2RY6,TAC4,CCR8,EDN1,CAV3,CD19,ATP2B1,MCOLN2,PTH1R,CD52,P2RY8,CDH23,CXCL13,ATP1A2,TRPM2,JPH1,AKAP6,CCR7,RYR2,MS4A1
GO:BP	regulation of intracellular pH	GO:0051453	1	0	89	601	6	18123	CA7,TMEM199,GRN,SLC4A4,SLC9A5,SLC4A1
GO:BP	intracellular pH reduction	GO:0051452	1	0	56	601	3	18123	CA7,TMEM199,GRN
GO:BP	negative regulation of meiotic cell cycle	GO:0051447	1	0	18	601	1	18123	PRKAR1A
GO:BP	regulation of meiotic cell cycle	GO:0051445	1	0	49	601	1	18123	PRKAR1A
GO:BP	negative regulation of ubiquitin-protein transferase activity	GO:0051444	1	0	20	601	1	18123	RPL23
GO:BP	regulation of stress fiber assembly	GO:0051492	1	0	94	601	3	18123	SYNPO2L,RGCC,ACTG1
GO:BP	regulation of histone H3-K9 methylation	GO:0051570	1	0	25	601	2	18123	BRCA1,SMARCB1
GO:BP	establishment of chromosome localization	GO:0051303	1	0	82	601	2	18123	KPNB1,BECN1
GO:BP	cell division	GO:0051301	1	0	630	601	12	18123	ANAPC11,LLGL2,CDK3,SYCE2,BECN1,ARF1,SKA2,CENPV,SFRP2,ANAPC2,AATF,CDK2AP2
GO:BP	negative regulation of protein metabolic process	GO:0051248	1	0	1216	601	37	18123	MAPT,PPP1R9B,DUSP14,CPAMD8,VIL1,UNK,BRCA1,EDN1,NF1,SPON1,TIMP2,XDH,PRKCG,PRKAR1A,IGF2BP1,RPTOR,CAV3,STAT3,UBE2Z,MMP9,TMEM98,NGFR,NT5C3B,GADD45B,RPL23,PATL1,BANP,GPS1,IGF2BP2,SFRP2,NLRP12,AATF,PPP1R27,PPP1R1B,SMARCB1,SOCS3,BCL2L12
GO:BP	positive regulation of protein metabolic process	GO:0051247	1	0	1577	601	57	18123	MAPT,CLDN4,CCL19,CCL5,KRT17,LGALS9,NODAL,NOS1AP,RSPO1,TAOK1,GRN,BRCA1,ENPP2,SOX9,FGD2,CTIF,EDN1,UHRF1,PIK3R6,SPON1,HSPA5,XDH,MAP2K3,DBF4B,PRKAR1A,RPTOR,CAV3,SIRT6,STAT3,TAB1,MIF4GD,LILRA5,CARD10,PTAFR,MMP9,TNFSF15,MUC20,TFR2,MST1R,NGFR,GADD45B,IQGAP3,ADCY1,CASP8,PCOLCE,ERBB2,KAT7,SFRP2,SPHK1,NLRP12,CCR7,ANGPT4,AKT2,PSMC5,SMARCB1,SOCS3,RGCC
GO:BP	regulation of protein metabolic process	GO:0051246	1	0	2759	601	90	18123	MAPT,EIF1,CLDN4,PPP1R9B,CCL19,DUSP14,CCL5,KRT17,LGALS9,CPAMD8,NODAL,NOS1AP,RSPO1,TAOK1,GRN,VIL1,UNK,BRCA1,ENPP2,SOX9,FGD2,CTIF,CASC3,EDN1,RPL38,UHRF1,PIK3R6,NF1,SPON1,TIMP2,HSPA5,XDH,MAP2K3,PRKCG,DBF4B,PRKAR1A,IGF2BP1,RPTOR,CAV3,NPFFR2,SIRT6,STAT3,TADA2A,UBE2Z,CCNJ,TRPT1,TAB1,MIF4GD,LILRA5,CARD10,PTAFR,MMP9,EEFSEC,TMEM98,TNFSF15,MUC20,TFR2,MST1R,NGFR,IL7,NT5C3B,GADD45B,RPL23,IQGAP3,ADCY1,CASP8,PA…
GO:BP	negative regulation of multicellular organismal process	GO:0051241	1	0	1174	601	41	18123	NR1D1,TNFRSF11B,LRPAP1,LGALS9,SOSTDC1,NODAL,NME2,GRN,LBP,DAND5,SOX9,TAC4,EDN1,ARHGDIA,NF1,PLAC8,DHX58,SEMA6C,CAV3,HLA-F,ATP2B1,WNT3,LILRA5,PPARA,CARD10,TIGIT,TMEM98,ABCC8,JUP,CXCL13,NGFR,ATP1A2,ERBB2,NME1,STARD13,SFRP2,NLRP12,CCR7,HDAC5,ANGPT4,RGCC
GO:BP	positive regulation of multicellular organismal process	GO:0051240	1	0	1497	601	60	18123	COL1A1,MAPT,SLN,CCL19,LRPAP1,ZBP1,KRT17,LGALS9,HLA-DRA,MYRF,NODAL,NME2,GRN,VIL1,BRCA1,LBP,SOX9,POLR2E,EDN1,ARHGDIA,PIK3R6,PLAC8,DHX58,GPR21,THRA,RAMP2,HLA-F,SIRT6,STAT3,ATP2B1,WNT3,MCOLN2,LILRA5,TIGIT,PTAFR,NLGN3,ABCC8,JUP,NGFR,IL7,HLA-A,TSHR,HOXB7,IQGAP3,CASP8,ATP1A2,BECN1,SFRP2,SPHK1,NLRP12,AKAP6,ANAPC2,CCR7,ANGPT4,RYR2,PTPRD,ESRRG,STAT5B,IRF7,RGCC
GO:BP	regulation of multicellular organismal process	GO:0051239	1	0	2888	601	99	18123	COL1A1,MAPT,NR1D1,SGCA,SLN,TNFRSF11B,SLC5A3,CCL19,LRPAP1,ZBP1,ITGA2B,KRT17,LGALS9,HLA-DRA,MYRF,SOSTDC1,NODAL,NME2,NOS1AP,GRN,SCN4A,CNN1,KCND1,SULT2B1,VIL1,BRCA1,LBP,ENPP2,DAND5,SOX9,TAC4,POLR2E,EDN1,ARHGDIA,PIK3R6,NF1,PLAC8,DHX58,H3F3B,XDH,MAP2K3,PTGDS,GPR21,THRA,RAMP2,INSL3,SEMA6C,IGF2BP1,CAV3,HLA-F,SIRT6,STAT3,HLA-B,ATP2B1,WNT3,MCOLN2,LILRA5,PPARA,CARD10,FXYD7,TIGIT,PTAFR,MMP9,NLGN3,TMEM98,ABCC…
GO:BP	establishment of RNA localization	GO:0051236	1	0	186	601	8	18123	KIF5C,SRSF1,CASC3,NXF3,IGF2BP1,SIDT1,ALKBH5,IGF2BP2
GO:BP	maintenance of location	GO:0051235	1	0	337	601	17	18123	CCL19,P2RY6,NRROS,DAND5,HSPA5,EHD1,CD19,MCOLN2,PPARA,VPS13A,ATP1A2,TRPM2,JPH1,AKAP6,CCR7,RYR2,STAT5B
GO:BP	spindle assembly	GO:0051225	1	0	115	601	1	18123	KPNB1
GO:BP	regulation of lymphocyte activation	GO:0051249	1	0	523	601	22	18123	CCL19,CCL5,LGALS9,RASAL3,HLA-DRA,PIK3R6,PRKAR1A,CD19,HLA-F,CD320,KLRC2,GRB2,ICOS,TIGIT,IL7,HLA-A,HLA-DQB1,ERBB2,RAC2,CCR7,DOCK8,STAT5B
GO:BP	negative regulation of protein transport	GO:0051224	1	0	135	601	1	18123	ABCC8
GO:BP	positive regulation of protein transport	GO:0051222	1	0	329	601	11	18123	RPH3AL,NMT1,ITGAM,JUP,CASP8,ERBB2,RAC2,USP36,ARF1,TRPM2,AKT2
GO:BP	cartilage development	GO:0051216	1	0	194	601	8	18123	COL1A1,SOX9,EDN1,ACAN,THRA,BGN,PTH1R,SFRP2
GO:BP	release of sequestered calcium ion into cytosol	GO:0051209	1	0	123	601	10	18123	CCL19,P2RY6,CD19,MCOLN2,ATP1A2,TRPM2,JPH1,AKAP6,CCR7,RYR2
GO:BP	sequestering of calcium ion	GO:0051208	1	0	130	601	10	18123	CCL19,P2RY6,CD19,MCOLN2,ATP1A2,TRPM2,JPH1,AKAP6,CCR7,RYR2
GO:BP	protein insertion into membrane	GO:0051205	1	0	97	601	3	18123	CCDC47,NMT1,CASP8
GO:BP	protein insertion into mitochondrial membrane	GO:0051204	1	0	49	601	2	18123	NMT1,CASP8
GO:BP	vitamin transport	GO:0051180	1	0	40	601	2	18123	CD320,SLC46A1
GO:BP	meiotic sister chromatid cohesion	GO:0051177	1	0	9	601	1	18123	RAD51C
GO:BP	regulation of phosphorus metabolic process	GO:0051174	1	0	1640	601	61	18123	MAPT,PPP1R9B,CCL19,DUSP14,CCL5,P2RY6,NODAL,RSPO1,TAOK1,SLC4A4,ENPP2,SOX9,FGD2,EDN1,SLC4A1,TSKS,PIK3R6,NF1,XDH,MAP2K3,DBF4B,PRKAR1A,RPTOR,CAV3,NPFFR2,CD19,STAT3,PTH1R,TADA2A,CCNJ,TRPT1,TAB1,LILRA5,PPARA,CARD10,PTAFR,MMP9,TNFSF15,MUC20,MST1R,IL7,GADD45B,IQGAP3,ADCY1,GPS1,SLC9A3R1,ERBB2,RAC2,PIP4K2B,ARR3,ARF1,SFRP2,SPHK1,NLRP12,CCR7,ANGPT4,AKT2,PPP1R27,PPP1R1B,SOCS3,RGCC
GO:BP	regulation of protein transport	GO:0051223	1	0	570	601	17	18123	NR1D1,CCL5,RPH3AL,LLGL2,NMT1,ITGAM,ABCC8,IFI27,JUP,CASP8,ERBB2,RAC2,USP36,ARF1,TRPM2,AKT2,STXBP4
GO:BP	regulation of cell division	GO:0051302	1	0	175	601	4	18123	BECN1,CENPV,SFRP2,CDK2AP2
GO:BP	negative regulation of lymphocyte activation	GO:0051250	1	0	160	601	5	18123	LGALS9,PRKAR1A,HLA-F,TIGIT,ERBB2
GO:BP	regulation of RNA metabolic process	GO:0051252	1	0	3847	601	97	18123	COL1A1,NR1D1,UBTF,ZNF341,LGALS9,NSRP1,SP2,ELF3,MYRF,NODAL,NME2,BRCA1,ZNF529,SRSF1,SAP30BP,DAND5,SOX9,RFX2,ZNF682,ZNF541,EDN1,MYT1L,UHRF1,PLAC8,TRIM37,PSMD12,BPTF,H3F3B,HSPA5,MAP2K3,NWD1,ZNF710,THRA,PRKAR1A,IGF2BP1,RPTOR,ZNF35,DDX11,MBTD1,SMARCE1,SUPT4H1,SIRT6,SSX4B,STAT3,ZNF780B,TADA2A,TAB1,RIPK4,PPARA,ARNT2,PTAFR,PSMB10,IFI27,JUP,PSMB3,TFR2,CAND2,NGFR,RFX1,ZNF101,NT5C3B,ZBTB26,PKHD1,HOXB7,DHX34,…
GO:BP	centrosome duplication	GO:0051298	1	0	72	601	3	18123	BRCA1,TRIM37,PKHD1
GO:BP	establishment of spindle orientation	GO:0051294	1	0	37	601	2	18123	LLGL2,PKHD1
GO:BP	establishment of spindle localization	GO:0051293	1	0	52	601	3	18123	LLGL2,KPNB1,PKHD1
GO:BP	protein homotetramerization	GO:0051289	1	0	56	601	1	18123	TRPM2
GO:BP	positive regulation of sequestering of calcium ion	GO:0051284	1	0	17	601	1	18123	RYR2
GO:BP	negative regulation of sequestering of calcium ion	GO:0051283	1	0	124	601	10	18123	CCL19,P2RY6,CD19,MCOLN2,ATP1A2,TRPM2,JPH1,AKAP6,CCR7,RYR2
GO:BP	regulation of sequestering of calcium ion	GO:0051282	1	0	126	601	10	18123	CCL19,P2RY6,CD19,MCOLN2,ATP1A2,TRPM2,JPH1,AKAP6,CCR7,RYR2
GO:BP	positive regulation of release of sequestered calcium ion into cytosol	GO:0051281	1	0	42	601	3	18123	P2RY6,CD19,AKAP6
GO:BP	regulation of release of sequestered calcium ion into cytosol	GO:0051279	1	0	85	601	6	18123	P2RY6,CD19,ATP1A2,JPH1,AKAP6,RYR2
GO:BP	positive regulation of lymphocyte activation	GO:0051251	1	0	366	601	17	18123	CCL19,CCL5,LGALS9,RASAL3,HLA-DRA,PIK3R6,HLA-F,CD320,KLRC2,GRB2,ICOS,IL7,HLA-A,HLA-DQB1,CCR7,DOCK8,STAT5B
GO:BP	chromosome organization	GO:0051276	1	0	1270	601	39	18123	MAPT,CENPM,COPRS,TEN1,BRCA1,SOX9,NAA60,ZNF541,ANAPC11,UHRF1,TRIM37,BPTF,H3F3B,CHAF1A,FAM50A,DDX11,MBTD1,SMARCE1,SUPT4H1,GPX4,SIRT6,TADA2A,KPNB1,SLX4,RFC2,SYCE2,RAD51C,RAD51D,BANP,GPS1,BECN1,KAT7,USP36,CENPV,EZH1,MBD3,HDAC5,TTLL12,SMARCB1
GO:BP	negative regulation of cellular component movement	GO:0051271	1	0	384	601	18	18123	NODAL,ARHGDIA,NF1,KRT16,FRMD5,STAT3,CARD10,ABCC8,JUP,CXCL13,PKHD1,MMP28,SLC9A3R1,STARD13,SFRP2,HDAC5,ANGPT4,RGCC
GO:BP	regulation of cellular component movement	GO:0051270	1	0	1149	601	54	18123	COL1A1,CLDN4,CCL19,ITGA2B,CCL5,LGALS9,P2RY6,NODAL,CCL27,GRN,VIL1,LBP,ENPP2,SOX9,TAC4,EDN1,ARHGDIA,NEFH,NF1,HSPA5,MAP2K3,INSL3,SEMA6C,KRT16,FRMD5,CAV3,STAT3,CCDC40,CARD10,PTAFR,MMP9,ABCC8,JUP,CXCL13,PKHD1,MMP28,ARHGAP18,TWIST2,ATP1A2,SLC9A3R1,ERBB2,RAC2,STARD13,SFRP2,SPHK1,CCR7,HDAC5,ANGPT4,AKT2,RYR2,DOCK8,RGCC,PREX1,ACTG1
GO:BP	protein tetramerization	GO:0051262	1	0	85	601	2	18123	TRPM2,MS4A1
GO:BP	protein depolymerization	GO:0051261	1	0	119	601	7	18123	PPP1R9B,SLN,TAOK1,VIL1,ADD2,TMOD4,FLII
GO:BP	protein homooligomerization	GO:0051260	1	0	181	601	7	18123	MAPT,KCND1,SLC1A2,EHD1,PRND,TRIM72,TRPM2
GO:BP	protein complex oligomerization	GO:0051259	1	0	237	601	8	18123	MAPT,KCND1,SLC1A2,EHD1,PRND,TRIM72,TRPM2,MS4A1
GO:BP	protein polymerization	GO:0051258	1	0	307	601	13	18123	MAPT,VIL1,ADD2,CAV3,GPX4,TBCD,GRB2,TMOD4,ARHGAP18,ARF1,CCR7,FLII,PREX1
GO:BP	positive regulation of RNA metabolic process	GO:0051254	1	0	1775	601	50	18123	COL1A1,NR1D1,UBTF,ZNF341,ELF3,MYRF,NODAL,NME2,BRCA1,SRSF1,SOX9,EDN1,UHRF1,PLAC8,TRIM37,BPTF,HSPA5,MAP2K3,THRA,RPTOR,DDX11,SMARCE1,SUPT4H1,STAT3,ZNF780B,TADA2A,PPARA,ARNT2,JUP,TFR2,CAND2,NGFR,NT5C3B,HOXB7,PATL1,BANP,ERBB2,KAT7,EZH1,SFRP2,HDAC5,AATF,ESRRG,STAT5B,PSMC5,SMARCB1,IRF7,RGCC,BCL2L12,TMPRSS6
GO:BP	negative regulation of RNA metabolic process	GO:0051253	1	0	1452	601	38	18123	NR1D1,SP2,ELF3,NODAL,BRCA1,ZNF529,SOX9,ZNF541,EDN1,MYT1L,UHRF1,TRIM37,BPTF,H3F3B,THRA,IGF2BP1,MBTD1,SMARCE1,SUPT4H1,SIRT6,STAT3,PPARA,IFI27,ZBTB26,DHX34,RPL23,TWIST2,KAT7,NPAS1,CENPV,EZH1,SFRP2,MBD3,HDAC5,PSMC5,IRF7,SIM2,TMPRSS6
GO:BP	positive regulation of cellular component movement	GO:0051272	1	0	605	601	32	18123	COL1A1,CLDN4,CCL19,ITGA2B,CCL5,LGALS9,P2RY6,CCL27,GRN,VIL1,LBP,ENPP2,SOX9,TAC4,EDN1,HSPA5,MAP2K3,INSL3,SEMA6C,STAT3,PTAFR,MMP9,CXCL13,TWIST2,RAC2,SPHK1,CCR7,ANGPT4,AKT2,DOCK8,PREX1,ACTG1
GO:BP	mammary gland involution	GO:0060056	1	0	9	601	1	18123	ELF3
GO:BP	regulation of syncytium formation by plasma membrane fusion	GO:0060142	1	0	27	601	1	18123	EHD1
GO:BP	Spemann organizer formation at the anterior end of the primitive streak	GO:0060064	1	0	1	601	1	18123	WNT3
GO:BP	glucose catabolic process to pyruvate	GO:0061718	1	0	24	601	1	18123	ALDOC
GO:BP	detoxification of inorganic compound	GO:0061687	1	0	17	601	1	18123	MT1M
GO:BP	spontaneous neurotransmitter secretion	GO:0061669	1	0	7	601	1	18123	RPH3A
GO:BP	histone H3-K9 modification	GO:0061647	1	0	49	601	3	18123	BRCA1,SIRT6,SMARCB1
GO:BP	CENP-A containing chromatin organization	GO:0061641	1	0	43	601	1	18123	CENPM
GO:BP	cytoskeleton-dependent cytokinesis	GO:0061640	1	0	102	601	1	18123	ARF1
GO:BP	fructose catabolic process to hydroxyacetone phosphate and glyceraldehyde-3-phosphate	GO:0061624	1	0	5	601	1	18123	KHK
GO:BP	canonical glycolysis	GO:0061621	1	0	24	601	1	18123	ALDOC
GO:BP	glycolytic process through glucose-6-phosphate	GO:0061620	1	0	26	601	1	18123	ALDOC
GO:BP	glycolytic process through fructose-6-phosphate	GO:0061615	1	0	27	601	2	18123	ALDOC,SLC4A1
GO:BP	pri-miRNA transcription by RNA polymerase II	GO:0061614	1	0	51	601	4	18123	SOX9,STAT3,PPARA,NGFR
GO:BP	calcium ion transmembrane transport via high voltage-gated calcium channel	GO:0061577	1	0	18	601	1	18123	NOS1AP
GO:BP	actin filament bundle organization	GO:0061572	1	0	164	601	5	18123	VIL1,ADD2,SYNPO2L,RGCC,ACTG1
GO:BP	axon development	GO:0061564	1	0	524	601	20	18123	MAPT,CHN1,KIF5C,GRN,ULK2,LRTM1,ARHGDIA,NEFH,DCLK1,SEMA6C,WNT3,GRB2,NLGN3,NGFR,KIF5A,ADCY1,ERBB2,RAC2,ANAPC2,DPYSL5
GO:BP	myeloid cell development	GO:0061515	1	0	69	601	3	18123	NRROS,EPB42,SLC4A1
GO:BP	protein localization to cilium	GO:0061512	1	0	62	601	3	18123	CROCC,EHD1,IFT20
GO:BP	memory T cell proliferation	GO:0061485	1	0	1	601	1	18123	DOCK8
GO:BP	regulation of type B pancreatic cell proliferation	GO:0061469	1	0	14	601	1	18123	NR1D1
GO:BP	protein localization to lysosome	GO:0061462	1	0	45	601	1	18123	KPTN
GO:BP	mitochondrion disassembly	GO:0061726	1	0	77	601	3	18123	WIPI1,BECN1,USP36
GO:BP	leukotriene signaling pathway	GO:0061737	1	0	5	601	1	18123	CYSLTR2
GO:BP	leukocyte adhesion to vascular endothelial cell	GO:0061756	1	0	57	601	2	18123	ADD2,PTAFR
GO:BP	dense core granule priming	GO:0061789	1	0	3	601	1	18123	UNC13A
GO:BP	positive regulation of programmed necrotic cell death	GO:0062100	1	0	8	601	1	18123	ZBP1
GO:BP	negative regulation of programmed necrotic cell death	GO:0062099	1	0	22	601	1	18123	CASP8
GO:BP	regulation of programmed necrotic cell death	GO:0062098	1	0	40	601	2	18123	ZBP1,CASP8
GO:BP	negative regulation of small molecule metabolic process	GO:0062014	1	0	107	601	6	18123	BRCA1,SOX9,SLC4A1,STAT3,PPARA,DKKL1
GO:BP	positive regulation of small molecule metabolic process	GO:0062013	1	0	147	601	8	18123	NR1D1,P2RY6,SLC4A4,STAT3,PTH1R,PPARA,PTAFR,AKT2
GO:BP	regulation of small molecule metabolic process	GO:0062012	1	0	430	601	19	18123	NR1D1,IGFBP4,P2RY6,BRCA1,SLC4A4,SOX9,SLC4A1,PSMD12,KHK,STAT3,PTH1R,PPARA,KPNB1,PTAFR,DKKL1,PSMB10,PSMB3,AKT2,PSMC5
GO:BP	meiosis II cell cycle process	GO:0061983	1	0	9	601	1	18123	RAD51C
GO:BP	meiosis I cell cycle process	GO:0061982	1	0	133	601	6	18123	EME1,SLX4,MOV10L1,SYCE2,RAD51C,RAD51D
GO:BP	articular cartilage development	GO:0061975	1	0	3	601	1	18123	BGN
GO:BP	reproductive system development	GO:0061458	1	0	436	601	16	18123	PPP1R9B,KRT19,NODAL,SOX9,BPTF,HSPA5,INSL3,KRT8,GRB2,GAS2,CASP8,CYP7B1,SFRP2,STAT5B,SOCS3,RSPO3
GO:BP	establishment of protein localization to plasma membrane	GO:0061951	1	0	62	601	1	18123	RAB34
GO:BP	selective autophagy	GO:0061912	1	0	88	601	1	18123	BECN1
GO:BP	autophagosome-lysosome fusion	GO:0061909	1	0	8	601	1	18123	PIP4K2B
GO:BP	negative regulation of astrocyte activation	GO:0061889	1	0	5	601	1	18123	NR1D1
GO:BP	regulation of astrocyte activation	GO:0061888	1	0	8	601	1	18123	NR1D1
GO:BP	negative regulation of neuroblast migration	GO:0061855	1	0	1	601	1	18123	ABCC8
GO:BP	regulation of neuroblast migration	GO:0061853	1	0	1	601	1	18123	ABCC8
GO:BP	antimicrobial humoral immune response mediated by antimicrobial peptide	GO:0061844	1	0	81	601	7	18123	SPAG11A,CXCL2,GALP,GNLY,CXCL13,CXCL3,CXCL1
GO:BP	microtubule organizing center localization	GO:0061842	1	0	34	601	3	18123	IFT20,TMEM201,PKHD1
GO:BP	telomeric D-loop disassembly	GO:0061820	1	0	9	601	1	18123	SLX4
GO:BP	process utilizing autophagic mechanism	GO:0061919	1	0	564	601	13	18123	MAPT,ITGB4,ULK2,RAB43,MVB12A,RPTOR,IFT20,STAT3,VPS13A,WIPI1,BECN1,PIP4K2B,USP36
GO:BP	trophoblast cell migration	GO:0061450	1	0	18	601	2	18123	ITGB4,NODAL
GO:BP	connective tissue development	GO:0061448	1	0	255	601	8	18123	COL1A1,SOX9,EDN1,ACAN,THRA,BGN,PTH1R,SFRP2
GO:BP	establishment of skin barrier	GO:0061436	1	0	25	601	2	18123	CLDN4,KRT16
GO:BP	negative regulation of heart growth	GO:0061117	1	0	32	601	2	18123	CAV3,PPARA
GO:BP	positive regulation of protein tyrosine kinase activity	GO:0061098	1	0	58	601	2	18123	CCL5,LILRA5
GO:BP	regulation of protein tyrosine kinase activity	GO:0061097	1	0	93	601	2	18123	CCL5,LILRA5
GO:BP	positive regulation of phospholipid translocation	GO:0061092	1	0	5	601	1	18123	ABCB4
GO:BP	regulation of phospholipid translocation	GO:0061091	1	0	6	601	1	18123	ABCB4
GO:BP	chaperone-mediated protein folding	GO:0061077	1	0	63	601	3	18123	HSPA5,UNC45B,DNAJC7
GO:BP	muscle structure development	GO:0061061	1	0	646	601	29	18123	CHRND,SGCA,KRT19,SOSTDC1,COPRS,SOX9,FER1L5,EDN1,TLL2,RAMP2,PRKAR1A,EHD1,CAV3,IFT20,SIRT6,KRT8,SYNPO2L,STAC3,PPARA,TMOD4,LARGE,TRIM72,UNC45B,JPH1,AKAP6,HDAC5,RYR2,FLII,ACTG1
GO:BP	sclerotome development	GO:0061056	1	0	5	601	1	18123	SFRP2
GO:BP	dermatome development	GO:0061054	1	0	4	601	1	18123	SFRP2
GO:BP	regulation of proteasomal protein catabolic process	GO:0061136	1	0	189	601	3	18123	PRKCG,SIRT6,PSMC5
GO:BP	somite development	GO:0061053	1	0	87	601	1	18123	SFRP2
GO:BP	positive regulation of cell growth involved in cardiac muscle cell development	GO:0061051	1	0	13	601	2	18123	EDN1,AKAP6
GO:BP	regulation of cell growth involved in cardiac muscle cell development	GO:0061050	1	0	24	601	4	18123	EDN1,CAV3,PPARA,AKAP6
GO:BP	cell growth involved in cardiac muscle cell development	GO:0061049	1	0	38	601	4	18123	EDN1,CAV3,PPARA,AKAP6
GO:BP	regulation of branching involved in lung morphogenesis	GO:0061046	1	0	6	601	1	18123	SOX9
GO:BP	negative regulation of wound healing	GO:0061045	1	0	83	601	2	18123	EDN1,ABCC8
GO:BP	regulation of wound healing	GO:0061041	1	0	138	601	6	18123	CLDN4,VIL1,EDN1,INSL3,ABCC8,ACTG1
GO:BP	negative regulation of cartilage development	GO:0061037	1	0	30	601	1	18123	SOX9
GO:BP	positive regulation of cartilage development	GO:0061036	1	0	32	601	1	18123	SOX9
GO:BP	regulation of cartilage development	GO:0061035	1	0	72	601	1	18123	SOX9
GO:BP	negative regulation of cell growth involved in cardiac muscle cell development	GO:0061052	1	0	13	601	2	18123	CAV3,PPARA
GO:BP	detection of stimulus involved in sensory perception of pain	GO:0062149	1	0	26	601	1	18123	TAC4
GO:BP	morphogenesis of a branching epithelium	GO:0061138	1	0	184	601	10	18123	SOX9,EDN1,CAV3,SIRT6,GRB2,PKHD1,HOXB7,SFRP2,SOCS3,RSPO3
GO:BP	endothelial tube morphogenesis	GO:0061154	1	0	20	601	1	18123	STARD13
GO:BP	bone trabecula morphogenesis	GO:0061430	1	0	12	601	1	18123	COL1A1
GO:BP	regulation of transcription from RNA polymerase II promoter in response to hypoxia	GO:0061418	1	0	78	601	4	18123	PSMD12,PSMB10,PSMB3,PSMC5
GO:BP	regulation of extent of cell growth	GO:0061387	1	0	110	601	4	18123	MAPT,SEMA6C,WNT3,ANAPC2
GO:BP	heart trabecula morphogenesis	GO:0061384	1	0	31	601	1	18123	CAV3
GO:BP	trabecula morphogenesis	GO:0061383	1	0	44	601	2	18123	COL1A1,CAV3
GO:BP	determination of heart left/right asymmetry	GO:0061371	1	0	71	601	3	18123	NODAL,DAND5,CCDC40
GO:BP	testosterone biosynthetic process	GO:0061370	1	0	7	601	1	18123	DKKL1
GO:BP	neural precursor cell proliferation	GO:0061351	1	0	151	601	4	18123	NF1,IGF2BP1,IFT20,SLC39A5
GO:BP	establishment or maintenance of monopolar cell polarity	GO:0061339	1	0	25	601	2	18123	IFT20,SLC9A3R1
GO:BP	lung smooth muscle development	GO:0061145	1	0	2	601	1	18123	SOX9
GO:BP	cardiac conduction	GO:0061337	1	0	142	601	8	18123	KCND1,ATP2B1,FXYD7,JUP,CORIN,ATP1A2,CACNA1G,RYR2
GO:BP	renal tubule development	GO:0061326	1	0	97	601	2	18123	SOX9,HOXB7
GO:BP	cell proliferation involved in heart morphogenesis	GO:0061323	1	0	20	601	1	18123	SOX9
GO:BP	establishment or maintenance of bipolar cell polarity	GO:0061245	1	0	49	601	3	18123	IFT20,SLC9A3R1,LIN7A
GO:BP	negative regulation of dermatome development	GO:0061185	1	0	1	601	1	18123	SFRP2
GO:BP	regulation of dermatome development	GO:0061183	1	0	4	601	1	18123	SFRP2
GO:BP	mammary gland epithelium development	GO:0061180	1	0	70	601	5	18123	SOSTDC1,CAV3,WNT3,IQGAP3,AKT2
GO:BP	regulation of insulin secretion involved in cellular response to glucose stimulus	GO:0061178	1	0	65	601	2	18123	NR1D1,STXBP4
GO:BP	establishment of monopolar cell polarity	GO:0061162	1	0	24	601	2	18123	IFT20,SLC9A3R1
GO:BP	mRNA destabilization	GO:0061157	1	0	107	601	2	18123	NT5C3B,PATL1
GO:BP	renal tubule morphogenesis	GO:0061333	1	0	77	601	2	18123	SOX9,HOXB7
GO:BP	membrane fusion	GO:0061025	1	0	179	601	9	18123	ADAM2,FER1L5,RAB34,GOSR1,GOSR2,LYZL4,PIP4K2B,SPHK1,AKT2
GO:BP	cellular response to chemical stress	GO:0062197	1	0	356	601	7	18123	MAPT,LRRC8E,NME2,MMP9,BECN1,TRPM2,SPHK1
GO:BP	positive regulation of pattern recognition receptor signaling pathway	GO:0062208	1	0	44	601	3	18123	LBP,DHX58,IFI35
GO:BP	response to lipoteichoic acid	GO:0070391	1	0	10	601	1	18123	LBP
GO:BP	Harderian gland development	GO:0070384	1	0	4	601	1	18123	SOX9
GO:BP	positive regulation of ERK1 and ERK2 cascade	GO:0070374	1	0	215	601	9	18123	CCL23,CCL19,CCL5,LGALS9,CCL14,P2RY6,NODAL,CCL3L1,CCR7
GO:BP	negative regulation of ERK1 and ERK2 cascade	GO:0070373	1	0	82	601	3	18123	WNK2,SLC9A3R1,NLRP12
GO:BP	regulation of ERK1 and ERK2 cascade	GO:0070372	1	0	310	601	14	18123	CCL23,CCL19,CCL5,LGALS9,CCL14,P2RY6,NODAL,WNK2,PKHD1,SLC9A3R1,ERBB2,CCL3L1,NLRP12,CCR7
GO:BP	ERK1 and ERK2 cascade	GO:0070371	1	0	331	601	16	18123	CCL23,CCL19,CCL5,LGALS9,CCL14,P2RY6,NODAL,SOX9,WNK2,PKHD1,IQGAP3,SLC9A3R1,ERBB2,CCL3L1,NLRP12,CCR7
GO:BP	hepatocyte differentiation	GO:0070365	1	0	16	601	1	18123	CYP1A1
GO:BP	thyroid hormone transport	GO:0070327	1	0	10	601	1	18123	TTR
GO:BP	negative regulation of G0 to G1 transition	GO:0070317	1	0	41	601	1	18123	BRCA1
GO:BP	regulation of G0 to G1 transition	GO:0070316	1	0	46	601	1	18123	BRCA1
GO:BP	G1 to G0 transition involved in cell differentiation	GO:0070315	1	0	3	601	1	18123	SLC39A5
GO:BP	G1 to G0 transition	GO:0070314	1	0	10	601	1	18123	SLC39A5
GO:BP	positive regulation of stress-activated protein kinase signaling cascade	GO:0070304	1	0	125	601	6	18123	CCL19,TAOK1,XDH,GADD45B,SPHK1,CCR7
GO:BP	negative regulation of stress-activated protein kinase signaling cascade	GO:0070303	1	0	52	601	1	18123	SFRP2
GO:BP	regulation of stress-activated protein kinase signaling cascade	GO:0070302	1	0	195	601	8	18123	CCL19,TAOK1,XDH,CAV3,GADD45B,SFRP2,SPHK1,CCR7
GO:BP	cellular response to hydrogen peroxide	GO:0070301	1	0	103	601	3	18123	BECN1,TRPM2,SPHK1
GO:BP	sarcoplasmic reticulum calcium ion transport	GO:0070296	1	0	43	601	4	18123	SLN,ATP1A2,AKAP6,RYR2
GO:BP	renal absorption	GO:0070293	1	0	18	601	2	18123	CLDN4,SLC9A3R1
GO:BP	N-acylethanolamine metabolic process	GO:0070291	1	0	5	601	1	18123	GDPD1
GO:BP	nucleotide-binding oligomerization domain containing signaling pathway	GO:0070423	1	0	41	601	2	18123	TAB1,CASP8
GO:BP	response to oxygen levels	GO:0070482	1	0	410	601	18	18123	COL1A1,TMEM199,EDN1,NF1,PSMD12,COX4I2,RAMP2,CYP1A1,PPARA,ARNT2,PSMB10,PSMB3,ALKBH5,BECN1,ANGPT4,RYR2,PSMC5,RGCC
GO:BP	leukocyte aggregation	GO:0070486	1	0	13	601	1	18123	RAC2
GO:BP	interleukin-1-mediated signaling pathway	GO:0070498	1	0	105	601	7	18123	ZBP1,PSMD12,TAB1,PSMB10,PSMB3,PSMC5,PELI3
GO:BP	negative regulation of leukocyte proliferation	GO:0070664	1	0	94	601	3	18123	LGALS9,PRKAR1A,ERBB2
GO:BP	regulation of leukocyte proliferation	GO:0070663	1	0	253	601	11	18123	CCL19,CCL5,LGALS9,RASAL3,PRKAR1A,CD320,IL7,HLA-A,ERBB2,RAC2,STAT5B
GO:BP	leukocyte proliferation	GO:0070661	1	0	327	601	15	18123	CCL19,CCL5,LGALS9,RASAL3,PRKAR1A,CD19,CD320,PSMB10,IL7,HLA-A,ERBB2,RAC2,DOCK8,STAT5B,MS4A1
GO:BP	protein modification by small protein conjugation or removal	GO:0070647	1	0	1193	601	31	18123	TRIM47,BRCA1,RNF43,ANAPC11,UHRF1,TRIM37,PSMD12,HSPA5,PRKCG,ASB4,UBE2Z,TAB1,RNF157,PSMB10,IFI27,PSMB3,CAND2,HLA-A,RPL23,DCST1,GPS1,NOSIP,TRIM72,BECN1,USP36,SPHK1,ANAPC2,PSMC5,SOCS3,DCAF4,PELI3
GO:BP	protein modification by small protein removal	GO:0070646	1	0	310	601	9	18123	BRCA1,PSMD12,TAB1,PSMB10,PSMB3,GPS1,BECN1,USP36,PSMC5
GO:BP	transepithelial transport	GO:0070633	1	0	31	601	4	18123	P2RY6,EDN1,SLC1A2,ACTG1
GO:BP	regulation of protein processing	GO:0070613	1	0	64	601	3	18123	SPON1,TMEM98,BCL2L12
GO:BP	calcium ion transmembrane transport	GO:0070588	1	0	327	601	17	18123	SLN,CCL19,P2RY6,NOS1AP,RGS9,CAV3,CD19,ATP2B1,MCOLN2,STAC3,ATP1A2,TRPM2,JPH1,CACNA1G,AKAP6,CCR7,RYR2
GO:BP	protein localization to mitochondrion	GO:0070585	1	0	148	601	7	18123	MAPT,SLC25A6,NMT1,PAM16,CASP8,RAC2,USP36
GO:BP	axonemal dynein complex assembly	GO:0070286	1	0	39	601	1	18123	CCDC40
GO:BP	positive regulation of neuron projection regeneration	GO:0070572	1	0	13	601	1	18123	GRN
GO:BP	response to interleukin-1	GO:0070555	1	0	217	601	16	18123	NR1D1,CCL23,CCL19,ZBP1,CCL5,LGALS9,CCL14,SOX9,EDN1,PSMD12,TAB1,PSMB10,PSMB3,CCL3L1,PSMC5,PELI3
GO:BP	response to fatty acid	GO:0070542	1	0	67	601	5	18123	NME2,SOX9,EDN1,PTAFR,NME1
GO:BP	protein K63-linked ubiquitination	GO:0070534	1	0	59	601	1	18123	PELI3
GO:BP	platelet aggregation	GO:0070527	1	0	64	601	5	18123	ITGA2B,PEAR1,STXBP3,TSPAN32,ACTG1
GO:BP	positive regulation of histone H4-K20 methylation	GO:0070512	1	0	1	601	1	18123	BRCA1
GO:BP	regulation of histone H4-K20 methylation	GO:0070510	1	0	1	601	1	18123	BRCA1
GO:BP	calcium ion import	GO:0070509	1	0	90	601	5	18123	SLN,CAV3,TRPM2,CACNA1G,MS4A1
GO:BP	regulation of microtubule cytoskeleton organization	GO:0070507	1	0	150	601	6	18123	MAPT,TAOK1,CAV3,TBCD,SKA2,CDK2AP2
GO:BP	poly-gamma-glutamate metabolic process	GO:0070500	1	0	1	601	1	18123	GGH
GO:BP	regulation of neuron projection regeneration	GO:0070570	1	0	34	601	1	18123	GRN
GO:BP	extracellular matrix constituent secretion	GO:0070278	1	0	14	601	1	18123	RGCC
GO:BP	pyroptosis	GO:0070269	1	0	18	601	2	18123	ZBP1,CASP8
GO:BP	cornification	GO:0070268	1	0	112	601	8	18123	KRT23,KRT19,KRT17,KRT39,KRT16,KRT15,KRT8,JUP
GO:BP	response to UV-A	GO:0070141	1	0	14	601	1	18123	MMP9
GO:BP	mitochondrial translational termination	GO:0070126	1	0	88	601	5	18123	MRPL38,MRPL27,MRPL55,MRPS23,MRPL2
GO:BP	mitochondrial translational elongation	GO:0070125	1	0	87	601	5	18123	MRPL38,MRPL27,MRPL55,MRPS23,MRPL2
GO:BP	interleukin-27-mediated signaling pathway	GO:0070106	1	0	15	601	1	18123	STAT3
GO:BP	interleukin-6-mediated signaling pathway	GO:0070102	1	0	34	601	2	18123	STAT3,SOCS3
GO:BP	positive regulation of chemokine-mediated signaling pathway	GO:0070101	1	0	3	601	1	18123	EDN1
GO:BP	negative regulation of chemokine-mediated signaling pathway	GO:0070100	1	0	7	601	1	18123	CCL5
GO:BP	regulation of chemokine-mediated signaling pathway	GO:0070099	1	0	10	601	2	18123	CCL5,EDN1
GO:BP	glycosylation	GO:0070085	1	0	263	601	7	18123	MUC17,MUC3A,PLOD3,ST8SIA5,MUC20,LARGE,FUT11
GO:BP	synaptic vesicle budding	GO:0070142	1	0	11	601	1	18123	ARF1
GO:BP	vacuolar proton-transporting V-type ATPase complex assembly	GO:0070072	1	0	6	601	1	18123	TMEM199
GO:BP	proton-transporting V-type ATPase complex assembly	GO:0070070	1	0	8	601	1	18123	TMEM199
GO:BP	neuron cellular homeostasis	GO:0070050	1	0	34	601	2	18123	TAOK1,ATP2B1
GO:BP	regulation of molecular function	GO:0065009	1	0	3191	601	130	18123	MAPT,CLDN4,PPP1R9B,CCL23,SLN,SLC5A3,CCL19,LRPAP1,DUSP14,CCL5,LGALS9,P2RY13,CHN1,RASGEF1C,CCL14,P2RY6,RASAL3,CPAMD8,NODAL,NOS1AP,TAOK1,GRN,TMC8,TEN1,VIL1,FGD2,CHN2,EDN1,ARHGDIA,LLGL2,GREM2,DGKI,SLC4A1,TSKS,UHRF1,PIK3R6,NF1,SPON1,TRIM37,TIMP2,XDH,MAP2K3,ADD2,RASGRF1,NWD1,MTRNR2L2,DBF4B,RAMP2,PRKAR1A,RPTOR,DDX11,WNK2,RGS9,CAV3,NPFFR2,CD19,RINL,STAT3,UBE2Z,CCNJ,TRPT1,TAB1,CYTH3,ITGAM,LILRA5,RIPK4,STA…
GO:BP	biological regulation	GO:0065007	1	0	12802	601	433	18123	COL1A1,MAPT,NR1D1,CHRND,EIF1,LGI3,CLDN4,UBTF,ADAMDEC1,PPP1R9B,GRAP,ZACN,SGCA,ZNF341,CCL23,SLN,TNFRSF11B,ITGB4,CA7,SLC5A3,KRT19,COL8A1,DLEC1,CCL19,LRPAP1,ZBP1,ITGA2B,IGFBP4,DUSP14,CCL5,KRT17,TMEM199,LGALS9,P2RY13,CHN1,CHRNG,RASGEF1C,ERAP2,NSRP1,SP2,LRRC8E,CCL14,CCL15-CCL14,P2RY6,RASAL3,HLA-DRA,ELF3,MUC17,CPAMD8,MYRF,SOSTDC1,NODAL,CGN,CCL27,NME2,NOS1AP,ADRBK2,RSPO1,TAOK1,GRK4,GRN,ADAM2,SCN4A,MROH2B…
GO:BP	protein-lipid complex assembly	GO:0065005	1	0	35	601	1	18123	ARF1
GO:BP	protein-DNA complex assembly	GO:0065004	1	0	300	601	14	18123	CENPM,UBTF,SOX9,NAA60,PSMD12,H3F3B,CHAF1A,THRA,PSMB10,PSMB3,RAD51C,CENPV,PSMC5,SMARCB1
GO:BP	protein-containing complex assembly	GO:0065003	1	0	1724	601	57	18123	MAPT,HIGD1B,CENPM,UBTF,TMEM199,ATPAF2,HLA-DRA,TMC8,KCND1,VIL1,SRSF1,PTGES3L,SOX9,NAA60,RPL38,SLC1A2,PSMD12,H3F3B,HSPA5,CHAF1A,ADD2,THRA,EHD1,CAV3,GPX4,UQCC3,GOSR2,PRND,CCDC40,TBCD,CARD10,GRB2,UNC13A,PSMB10,CXCL13,PSMB3,CAND2,TMOD4,ARHGAP18,RAD51C,CASP8,SLC9A3R1,LIN7A,TRIM72,ARF1,COIL,LUC7L3,CENPV,TRPM2,SLC7A9,CCR7,ANGPT4,FLII,PSMC5,SMARCB1,MS4A1,PREX1
GO:BP	intracellular protein transmembrane transport	GO:0065002	1	0	52	601	4	18123	HSPA5,PAM16,PEX6,AKT2
GO:BP	specification of axis polarity	GO:0065001	1	0	5	601	1	18123	NODAL
GO:BP	proton-transporting two-sector ATPase complex assembly	GO:0070071	1	0	15	601	2	18123	TMEM199,ATPAF2
GO:BP	regulation of pattern recognition receptor signaling pathway	GO:0062207	1	0	110	601	6	18123	NR1D1,LBP,DHX58,SEC14L1,IFI35,IRF7
GO:BP	enamel mineralization	GO:0070166	1	0	17	601	1	18123	PPARA
GO:BP	negative regulation of biomineral tissue development	GO:0070168	1	0	28	601	1	18123	SOX9
GO:BP	necroptotic process	GO:0070266	1	0	54	601	2	18123	ZBP1,CASP8
GO:BP	necrotic cell death	GO:0070265	1	0	75	601	2	18123	ZBP1,CASP8
GO:BP	actin-mediated cell contraction	GO:0070252	1	0	122	601	9	18123	NOS1AP,VIL1,MYBPC2,CAV3,JUP,ATP1A2,CACNA1G,RYR2,TPM3
GO:BP	positive regulation of activated T cell autonomous cell death	GO:0070241	1	0	1	601	1	18123	LGALS9
GO:BP	regulation of activated T cell autonomous cell death	GO:0070239	1	0	1	601	1	18123	LGALS9
GO:BP	activated T cell autonomous cell death	GO:0070238	1	0	1	601	1	18123	LGALS9
GO:BP	positive regulation of T cell apoptotic process	GO:0070234	1	0	14	601	2	18123	CCL5,LGALS9
GO:BP	negative regulation of T cell apoptotic process	GO:0070233	1	0	20	601	2	18123	CCL5,DOCK8
GO:BP	regulation of T cell apoptotic process	GO:0070232	1	0	36	601	3	18123	CCL5,LGALS9,DOCK8
GO:BP	regulation of biomineral tissue development	GO:0070167	1	0	93	601	2	18123	SOX9,ATP2B1
GO:BP	T cell apoptotic process	GO:0070231	1	0	53	601	3	18123	CCL5,LGALS9,DOCK8
GO:BP	negative regulation of lymphocyte apoptotic process	GO:0070229	1	0	30	601	2	18123	CCL5,DOCK8
GO:BP	regulation of lymphocyte apoptotic process	GO:0070228	1	0	55	601	3	18123	CCL5,LGALS9,DOCK8
GO:BP	lymphocyte apoptotic process	GO:0070227	1	0	74	601	3	18123	CCL5,LGALS9,DOCK8
GO:BP	protein homotrimerization	GO:0070207	1	0	15	601	1	18123	SLC1A2
GO:BP	protein trimerization	GO:0070206	1	0	17	601	1	18123	SLC1A2
GO:BP	regulation of establishment of protein localization	GO:0070201	1	0	595	601	18	18123	MAPT,NR1D1,CCL5,RPH3AL,LLGL2,NMT1,ITGAM,ABCC8,IFI27,JUP,CASP8,ERBB2,RAC2,USP36,ARF1,TRPM2,AKT2,STXBP4
GO:BP	synaptonemal complex organization	GO:0070193	1	0	25	601	1	18123	SYCE2
GO:BP	chromosome organization involved in meiotic cell cycle	GO:0070192	1	0	69	601	2	18123	SYCE2,RAD51C
GO:BP	positive regulation of biomineral tissue development	GO:0070169	1	0	47	601	1	18123	ATP2B1
GO:BP	positive regulation of lymphocyte apoptotic process	GO:0070230	1	0	17	601	2	18123	CCL5,LGALS9
GO:BP	membrane organization	GO:0061024	1	0	1016	601	34	18123	MYRF,ADAM2,FER1L5,RAB34,SLC4A1,CCDC47,NMT1,ATP10A,GOSR1,CAV3,TMEM201,STAT3,UQCC3,GOSR2,ITGAM,KPNB1,GRB2,LYZL4,NLGN3,CASP8,SUN5,SLC9A3R1,TRIM72,BECN1,RAC2,PIP4K2B,ARF1,PITPNC1,SPHK1,AKT2,ABCB4,PTPRD,FER1L6,ACTG1
GO:BP	positive regulation of mRNA catabolic process	GO:0061014	1	0	110	601	2	18123	NT5C3B,PATL1
GO:BP	regulation of mRNA catabolic process	GO:0061013	1	0	255	601	10	18123	PSMD12,IGF2BP1,PSMB10,PSMB3,NT5C3B,DHX34,PATL1,ALKBH5,IGF2BP2,PSMC5
GO:BP	regulation of interferon-gamma-mediated signaling pathway	GO:0060334	1	0	26	601	1	18123	SOCS3
GO:BP	interferon-gamma-mediated signaling pathway	GO:0060333	1	0	88	601	8	18123	HLA-DRA,HLA-F,HLA-B,PTAFR,HLA-A,HLA-DQA1,IRF7,SOCS3
GO:BP	regulation of response to interferon-gamma	GO:0060330	1	0	26	601	1	18123	SOCS3
GO:BP	cytoplasmic actin-based contraction involved in cell motility	GO:0060327	1	0	3	601	1	18123	VIL1
GO:BP	cell chemotaxis	GO:0060326	1	0	310	601	21	18123	CCL23,CCL19,CCL5,LGALS9,CCL14,CCL15-CCL14,CCL27,LBP,CXCL2,CCR8,EDN1,CXCL13,CXCL3,MMP28,CYP7B1,CXCL1,RAC2,CCL3L1,TRPM2,CCR7,PREX1
GO:BP	face morphogenesis	GO:0060325	1	0	30	601	1	18123	COL1A1
GO:BP	face development	GO:0060324	1	0	47	601	1	18123	COL1A1
GO:BP	head morphogenesis	GO:0060323	1	0	36	601	2	18123	COL1A1,WNT3
GO:BP	head development	GO:0060322	1	0	816	601	26	18123	COL1A1,PPP1R9B,NODAL,SOX9,DCLK1,KIRREL3,SLC1A2,NF1,BPTF,HSPA5,TTLL1,IGF2BP1,ATP2B1,WNT3,ITGAM,ARNT2,MAST1,ADCK4,ADCY1,ATP1A2,NME1,EZH1,SFRP2,MBD3,SPHK1,STXBP3
GO:BP	positive regulation of ryanodine-sensitive calcium-release channel activity	GO:0060316	1	0	9	601	1	18123	AKAP6
GO:BP	regulation of ryanodine-sensitive calcium-release channel activity	GO:0060314	1	0	27	601	2	18123	JPH1,AKAP6
GO:BP	regulation of ventricular cardiac muscle cell membrane repolarization	GO:0060307	1	0	25	601	2	18123	NOS1AP,CAV3
GO:BP	regulation of membrane repolarization	GO:0060306	1	0	41	601	3	18123	NOS1AP,CAV3,AKAP6
GO:BP	regulation of cytokine activity	GO:0060300	1	0	4	601	1	18123	GREM2
GO:BP	negative regulation of sarcomere organization	GO:0060299	1	0	1	601	1	18123	CAV3
GO:BP	positive regulation of sarcomere organization	GO:0060298	1	0	6	601	1	18123	EDN1
GO:BP	regulation of sarcomere organization	GO:0060297	1	0	8	601	2	18123	EDN1,CAV3
GO:BP	regulation of cilium movement involved in cell motility	GO:0060295	1	0	26	601	1	18123	TAC4
GO:BP	cilium movement involved in cell motility	GO:0060294	1	0	120	601	4	18123	TAC4,TTLL1,CCDC40,VPS13A
GO:BP	type I interferon signaling pathway	GO:0060337	1	0	96	601	9	18123	ZBP1,IFI35,HLA-F,HLA-B,IFI27,HLA-A,DCST1,TTLL12,IRF7
GO:BP	regulation of type I interferon-mediated signaling pathway	GO:0060338	1	0	39	601	4	18123	ZBP1,DCST1,TTLL12,IRF7
GO:BP	negative regulation of type I interferon-mediated signaling pathway	GO:0060339	1	0	20	601	2	18123	DCST1,TTLL12
GO:BP	positive regulation of type I interferon-mediated signaling pathway	GO:0060340	1	0	13	601	2	18123	ZBP1,IRF7
GO:BP	calcium ion transport into cytosol	GO:0060402	1	0	167	601	11	18123	CCL19,P2RY6,CD19,MCOLN2,ATP1A2,TRPM2,JPH1,AKAP6,CCR7,RYR2,MS4A1
GO:BP	cytosolic calcium ion transport	GO:0060401	1	0	189	601	13	18123	CCL19,P2RY6,RGS9,CD19,ATP2B1,MCOLN2,ATP1A2,TRPM2,JPH1,AKAP6,CCR7,RYR2,MS4A1
GO:BP	growth hormone receptor signaling pathway via JAK-STAT	GO:0060397	1	0	14	601	2	18123	STAT3,STAT5B
GO:BP	growth hormone receptor signaling pathway	GO:0060396	1	0	26	601	2	18123	STAT3,STAT5B
GO:BP	SMAD protein signal transduction	GO:0060395	1	0	82	601	1	18123	NODAL
GO:BP	regulation of pathway-restricted SMAD protein phosphorylation	GO:0060393	1	0	62	601	1	18123	NODAL
GO:BP	positive regulation of SMAD protein signal transduction	GO:0060391	1	0	15	601	1	18123	NODAL
GO:BP	regulation of SMAD protein signal transduction	GO:0060390	1	0	27	601	1	18123	NODAL
GO:BP	pathway-restricted SMAD protein phosphorylation	GO:0060389	1	0	66	601	1	18123	NODAL
GO:BP	long-term synaptic depression	GO:0060292	1	0	31	601	4	18123	MAPT,GRID2IP,DGKI,ARF1
GO:BP	innervation	GO:0060384	1	0	23	601	1	18123	PRKCG
GO:BP	regulation of atrial cardiac muscle cell membrane depolarization	GO:0060371	1	0	10	601	1	18123	CACNA1G
GO:BP	cartilage development involved in endochondral bone morphogenesis	GO:0060351	1	0	31	601	2	18123	COL1A1,SOX9
GO:BP	endochondral bone morphogenesis	GO:0060350	1	0	55	601	3	18123	COL1A1,SOX9,COL13A1
GO:BP	bone morphogenesis	GO:0060349	1	0	97	601	4	18123	COL1A1,SOX9,COL13A1,SFRP2
GO:BP	bone development	GO:0060348	1	0	207	601	5	18123	COL1A1,SOX9,BGN,COL13A1,SFRP2
GO:BP	heart trabecula formation	GO:0060347	1	0	13	601	1	18123	CAV3
GO:BP	bone trabecula formation	GO:0060346	1	0	9	601	1	18123	COL1A1
GO:BP	trabecula formation	GO:0060343	1	0	22	601	2	18123	COL1A1,CAV3
GO:BP	regulation of cellular localization	GO:0060341	1	0	851	601	36	18123	MAPT,NR1D1,PPP1R9B,SLC5A3,LGALS9,P2RY6,VIL1,GPC2,CROCC,NEFH,DCLK1,NMT1,EHD1,GOSR1,CAV3,CD19,ITGAM,STAC3,CARD10,TMEM98,IFI27,JUP,NGFR,CASP8,ATP1A2,ERBB2,BECN1,RAC2,KAT7,USP36,ARF1,JPH1,AKAP6,AKT2,RYR2,STXBP4
GO:BP	regulation of ventricular cardiac muscle cell membrane depolarization	GO:0060373	1	0	8	601	1	18123	CAV3
GO:BP	long-term synaptic potentiation	GO:0060291	1	0	90	601	2	18123	PRKCG,ADCY1
GO:BP	epithelial cilium movement involved in determination of left/right asymmetry	GO:0060287	1	0	11	601	1	18123	CCDC40
GO:BP	cilium-dependent cell motility	GO:0060285	1	0	133	601	4	18123	TAC4,TTLL1,CCDC40,VPS13A
GO:BP	phospholipase C-activating dopamine receptor signaling pathway	GO:0060158	1	0	8	601	1	18123	SLC9A3R1
GO:BP	negative regulation of posttranscriptional gene silencing	GO:0060149	1	0	19	601	1	18123	STAT3
GO:BP	positive regulation of posttranscriptional gene silencing	GO:0060148	1	0	29	601	1	18123	STAT3
GO:BP	regulation of posttranscriptional gene silencing	GO:0060147	1	0	119	601	3	18123	POLR2E,H3F3B,STAT3
GO:BP	positive regulation of syncytium formation by plasma membrane fusion	GO:0060143	1	0	24	601	1	18123	EHD1
GO:BP	nervous system process	GO:0050877	1	0	1466	601	49	18123	COL1A1,MAPT,CHRND,PPP1R9B,GRAP,PDZD7,ZACN,ANKFN1,CHRNG,HLA-DRA,MYRF,SCN4A,CRYBA4,CRYGA,LAMC3,TAC4,JAKMIP1,EDN1,RPL38,DGKI,NF1,PRKCG,RASGRF1,THRA,LPO,RGS9,CAV3,IFT20,RPE65,TECTA,STAC3,HTR3D,PTAFR,NLGN3,COL18A1,TMEM98,ABCC8,CDH23,PIGR,ADCY1,ATP1A2,SLC9A3R1,OR8S1,ARR3,NPAS1,CACNA1G,MYO15A,PPP1R1B,PPEF1
GO:BP	embryonic process involved in female pregnancy	GO:0060136	1	0	6	601	1	18123	NODAL
GO:BP	maternal process involved in female pregnancy	GO:0060135	1	0	62	601	2	18123	LGALS9,NODAL
GO:BP	inner ear receptor cell stereocilium organization	GO:0060122	1	0	37	601	5	18123	PDZD7,IFT20,CDH23,TSHR,SLC9A3R1
GO:BP	limb development	GO:0060173	1	0	175	601	5	18123	ITGB4,SOX9,WNT3,FRAS1,SFRP2
GO:BP	inner ear receptor cell development	GO:0060119	1	0	49	601	5	18123	PDZD7,IFT20,CDH23,TSHR,SLC9A3R1
GO:BP	inner ear receptor cell differentiation	GO:0060113	1	0	66	601	5	18123	PDZD7,IFT20,CDH23,TSHR,SLC9A3R1
GO:BP	auditory receptor cell stereocilium organization	GO:0060088	1	0	16	601	2	18123	PDZD7,SLC9A3R1
GO:BP	circadian temperature homeostasis	GO:0060086	1	0	3	601	1	18123	NR1D1
GO:BP	inhibitory postsynaptic potential	GO:0060080	1	0	15	601	1	18123	NLGN3
GO:BP	excitatory postsynaptic potential	GO:0060079	1	0	104	601	4	18123	CHRND,CHRNG,DGKI,NLGN3
GO:BP	regulation of postsynaptic membrane potential	GO:0060078	1	0	142	601	4	18123	CHRND,CHRNG,DGKI,NLGN3
GO:BP	synapse maturation	GO:0060074	1	0	26	601	1	18123	ANAPC2
GO:BP	Wnt signaling pathway, planar cell polarity pathway	GO:0060071	1	0	110	601	7	18123	PLEKHA4,PSMD12,PSMB10,PSMB3,SFRP2,PSMC5,RSPO3
GO:BP	canonical Wnt signaling pathway	GO:0060070	1	0	349	601	18	18123	COL1A1,IGFBP4,SOSTDC1,RSPO1,SOX9,PLEKHA4,PSMD12,WNK2,IFT20,WNT3,DKKL1,PSMB10,JUP,PSMB3,SLC9A3R1,SFRP2,PSMC5,RSPO3
GO:BP	auditory receptor cell development	GO:0060117	1	0	22	601	2	18123	PDZD7,SLC9A3R1
GO:BP	muscle tissue morphogenesis	GO:0060415	1	0	70	601	2	18123	SIRT6,RYR2
GO:BP	limb bud formation	GO:0060174	1	0	11	601	2	18123	SOX9,WNT3
GO:BP	female mating behavior	GO:0060180	1	0	8	601	2	18123	THRA,PPP1R1B
GO:BP	regulation of cell development	GO:0060284	1	0	509	601	15	18123	MAPT,NR1D1,NODAL,GRN,ARHGDIA,NF1,SEMA6C,CAV3,WNT3,TMEM98,ABCC8,NGFR,ANAPC2,PTPRD,PREX1
GO:BP	cilium assembly	GO:0060271	1	0	418	601	9	18123	RFX2,CROCC,TTLL1,EHD1,IFT20,CCDC40,RABEP2,PKHD1,FBF1
GO:BP	negative regulation of respiratory burst	GO:0060268	1	0	5	601	1	18123	GRN
GO:BP	positive regulation of respiratory burst	GO:0060267	1	0	9	601	1	18123	LBP
GO:BP	negative regulation of respiratory burst involved in inflammatory response	GO:0060266	1	0	5	601	1	18123	GRN
GO:BP	positive regulation of respiratory burst involved in inflammatory response	GO:0060265	1	0	2	601	1	18123	LBP
GO:BP	regulation of respiratory burst involved in inflammatory response	GO:0060264	1	0	6	601	2	18123	GRN,LBP
GO:BP	regulation of respiratory burst	GO:0060263	1	0	16	601	3	18123	GRN,LBP,RAC2
GO:BP	positive regulation of transcription initiation from RNA polymerase II promoter	GO:0060261	1	0	29	601	1	18123	PSMC5
GO:BP	male mating behavior	GO:0060179	1	0	9	601	1	18123	PPP1R9B
GO:BP	regulation of transcription initiation from RNA polymerase II promoter	GO:0060260	1	0	79	601	3	18123	SOX9,THRA,PSMC5
GO:BP	regulation of macromolecule metabolic process	GO:0060255	1	0	6622	601	184	18123	COL1A1,MAPT,NR1D1,EIF1,CLDN4,UBTF,PPP1R9B,ZNF341,CCL19,LRPAP1,ZBP1,DUSP14,CCL5,KRT17,LGALS9,NSRP1,SP2,ELF3,CPAMD8,MYRF,NODAL,NME2,NOS1AP,RSPO1,TAOK1,GRN,TEN1,VIL1,UNK,BRCA1,LBP,ZNF529,SRSF1,SAP30BP,ENPP2,DAND5,SOX9,FGD2,CTIF,RFX2,POLR2E,ZNF682,CASC3,ZNF541,EDN1,RPL38,MYT1L,RPL19,UHRF1,PIK3R6,NF1,SPON1,PLAC8,TRIM37,DHX58,PSMD12,BPTF,TIMP2,H3F3B,HSPA5,XDH,MAP2K3,PRKCG,NWD1,DBF4B,ZNF710,THRA,RAMP2,P…
GO:BP	negative regulation of glial cell proliferation	GO:0060253	1	0	16	601	1	18123	ABCC8
GO:BP	regulation of glial cell proliferation	GO:0060251	1	0	39	601	1	18123	ABCC8
GO:BP	anatomical structure homeostasis	GO:0060249	1	0	486	601	24	18123	TNFRSF11B,TAOK1,TEN1,SOX9,CROCC,LYZ,NF1,SLC28A2,CAV3,SIRT6,RPE65,ATP2B1,PTH1R,SLX4,ABCC8,CDH23,RFC2,IL7,PIGR,LARGE,RAD51C,RAD51D,RAC2,ACTG1
GO:BP	retinal rod cell differentiation	GO:0060221	1	0	13	601	1	18123	SOX9
GO:BP	camera-type eye photoreceptor cell differentiation	GO:0060219	1	0	28	601	2	18123	SOX9,SDK2
GO:BP	hematopoietic stem cell differentiation	GO:0060218	1	0	89	601	4	18123	PSMD12,PSMB10,PSMB3,PSMC5
GO:BP	positive regulation of lipase activity	GO:0060193	1	0	75	601	3	18123	CCL5,P2RY6,PTAFR
GO:BP	regulation of lipase activity	GO:0060191	1	0	101	601	3	18123	CCL5,P2RY6,PTAFR
GO:BP	regulation of feeding behavior	GO:0060259	1	0	27	601	1	18123	STAT3
GO:BP	response to growth hormone	GO:0060416	1	0	41	601	3	18123	NME2,STAT3,STAT5B
GO:BP	heart growth	GO:0060419	1	0	110	601	6	18123	EDN1,PRKAR1A,CAV3,SIRT6,PPARA,AKAP6
GO:BP	regulation of heart growth	GO:0060420	1	0	84	601	4	18123	EDN1,CAV3,PPARA,AKAP6
GO:BP	negative regulation of response to cytokine stimulus	GO:0060761	1	0	92	601	4	18123	CCL5,DCST1,TTLL12,PELI3
GO:BP	positive regulation of response to cytokine stimulus	GO:0060760	1	0	57	601	4	18123	ZBP1,EDN1,IL7,IRF7
GO:BP	regulation of response to cytokine stimulus	GO:0060759	1	0	201	601	11	18123	ZBP1,CCL5,EDN1,IL7,DCST1,CASP8,SPHK1,TTLL12,IRF7,SOCS3,PELI3
GO:BP	regulation of mast cell chemotaxis	GO:0060753	1	0	8	601	1	18123	RAC2
GO:BP	parental behavior	GO:0060746	1	0	12	601	1	18123	NPAS1
GO:BP	prostate gland epithelium morphogenesis	GO:0060740	1	0	25	601	2	18123	SOX9,CYP7B1
GO:BP	prostate gland morphogenetic growth	GO:0060737	1	0	4	601	1	18123	SOX9
GO:BP	prostate gland growth	GO:0060736	1	0	10	601	1	18123	SOX9
GO:BP	positive regulation of inositol phosphate biosynthetic process	GO:0060732	1	0	14	601	3	18123	P2RY6,PTH1R,PTAFR
GO:BP	regulation of branching involved in mammary gland duct morphogenesis	GO:0060762	1	0	4	601	1	18123	CAV3
GO:BP	intestinal epithelial structure maintenance	GO:0060729	1	0	7	601	1	18123	SOX9
GO:BP	labyrinthine layer morphogenesis	GO:0060713	1	0	21	601	3	18123	GRB2,SOCS3,RSPO3
GO:BP	spongiotrophoblast layer development	GO:0060712	1	0	14	601	1	18123	SOCS3
GO:BP	labyrinthine layer development	GO:0060711	1	0	44	601	4	18123	GRB2,CASP8,SOCS3,RSPO3
GO:BP	spongiotrophoblast differentiation	GO:0060708	1	0	5	601	1	18123	SOCS3
GO:BP	trophoblast giant cell differentiation	GO:0060707	1	0	13	601	1	18123	SOCS3
GO:BP	cell differentiation involved in embryonic placenta development	GO:0060706	1	0	27	601	4	18123	KRT19,KRT8,CASP8,SOCS3
GO:BP	regulation of morphogenesis of a branching structure	GO:0060688	1	0	51	601	4	18123	SOX9,CAV3,SIRT6,HOXB7
GO:BP	ureteric bud morphogenesis	GO:0060675	1	0	64	601	2	18123	SOX9,HOXB7
GO:BP	placenta blood vessel development	GO:0060674	1	0	31	601	1	18123	SOCS3
GO:BP	syncytiotrophoblast cell differentiation involved in labyrinthine layer development	GO:0060715	1	0	3	601	1	18123	CASP8
GO:BP	branching involved in labyrinthine layer morphogenesis	GO:0060670	1	0	12	601	3	18123	GRB2,SOCS3,RSPO3
GO:BP	regulation of androgen receptor signaling pathway	GO:0060765	1	0	61	601	2	18123	NODAL,H3F3B
GO:BP	epithelial cell proliferation involved in prostate gland development	GO:0060767	1	0	11	601	1	18123	SOX9
GO:BP	common bile duct development	GO:0061009	1	0	5	601	1	18123	SOX9
GO:BP	hepaticobiliary system development	GO:0061008	1	0	153	601	8	18123	NODAL,SRSF1,SOX9,RPL19,NF1,CYP1A1,CCDC40,PRKCSH
GO:BP	cell differentiation involved in kidney development	GO:0061005	1	0	58	601	1	18123	MMP9
GO:BP	positive regulation of dendritic spine development	GO:0060999	1	0	44	601	1	18123	ARF1
GO:BP	regulation of dendritic spine development	GO:0060998	1	0	63	601	1	18123	ARF1
GO:BP	dendritic spine development	GO:0060996	1	0	102	601	1	18123	ARF1
GO:BP	kidney morphogenesis	GO:0060993	1	0	94	601	3	18123	SOX9,HOXB7,FRAS1
GO:BP	coronary vasculature development	GO:0060976	1	0	49	601	1	18123	TAB1
GO:BP	negative regulation of gene silencing	GO:0060969	1	0	32	601	1	18123	STAT3
GO:BP	negative regulation of androgen receptor signaling pathway	GO:0060766	1	0	15	601	1	18123	NODAL
GO:BP	regulation of gene silencing	GO:0060968	1	0	138	601	4	18123	POLR2E,H3F3B,SIRT6,STAT3
GO:BP	regulation of gene silencing by RNA	GO:0060966	1	0	120	601	3	18123	POLR2E,H3F3B,STAT3
GO:BP	negative regulation of gene silencing by miRNA	GO:0060965	1	0	18	601	1	18123	STAT3
GO:BP	regulation of gene silencing by miRNA	GO:0060964	1	0	117	601	3	18123	POLR2E,H3F3B,STAT3
GO:BP	regulation of protein folding in endoplasmic reticulum	GO:0060904	1	0	1	601	1	18123	HSPA5
GO:BP	artery development	GO:0060840	1	0	103	601	3	18123	NF1,TAB1,NGFR
GO:BP	regulation of canonical Wnt signaling pathway	GO:0060828	1	0	302	601	17	18123	COL1A1,IGFBP4,SOSTDC1,RSPO1,SOX9,PLEKHA4,PSMD12,WNK2,IFT20,DKKL1,PSMB10,JUP,PSMB3,SLC9A3R1,SFRP2,PSMC5,RSPO3
GO:BP	epiblast cell-extraembryonic ectoderm cell signaling involved in anterior/posterior axis specification	GO:0060802	1	0	1	601	1	18123	NODAL
GO:BP	cell fate commitment involved in formation of primary germ layer	GO:0060795	1	0	31	601	2	18123	NODAL,SFRP2
GO:BP	regulation of cell proliferation involved in tissue homeostasis	GO:0060784	1	0	1	601	1	18123	SOX9
GO:BP	negative regulation of gene silencing by RNA	GO:0060967	1	0	19	601	1	18123	STAT3
GO:BP	Spemann organizer formation	GO:0060061	1	0	4	601	1	18123	WNT3
GO:BP	embryonic placenta morphogenesis	GO:0060669	1	0	25	601	3	18123	GRB2,SOCS3,RSPO3
GO:BP	mammary gland epithelial cell differentiation	GO:0060644	1	0	17	601	1	18123	AKT2
GO:BP	epithelial cell proliferation involved in prostatic bud elongation	GO:0060517	1	0	1	601	1	18123	SOX9
GO:BP	primary prostatic bud elongation	GO:0060516	1	0	2	601	1	18123	SOX9
GO:BP	prostate gland morphogenesis	GO:0060512	1	0	27	601	2	18123	SOX9,CYP7B1
GO:BP	type I pneumocyte differentiation	GO:0060509	1	0	5	601	1	18123	THRA
GO:BP	epithelial cell proliferation involved in lung morphogenesis	GO:0060502	1	0	9	601	1	18123	SOX9
GO:BP	regulation of cell projection assembly	GO:0060491	1	0	193	601	7	18123	CCL19,CROCC,IFT20,RABEP2,RAC2,TRPM2,CCR7
GO:BP	lung epithelial cell differentiation	GO:0060487	1	0	23	601	2	18123	SOX9,THRA
GO:BP	mesenchyme development	GO:0060485	1	0	296	601	8	18123	COL1A1,NODAL,DAND5,SOX9,EDN1,SEMA6C,SFRP2,RGCC
GO:BP	lung cell differentiation	GO:0060479	1	0	24	601	2	18123	SOX9,THRA
GO:BP	bronchus cartilage development	GO:0060532	1	0	2	601	1	18123	SOX9
GO:BP	left lung morphogenesis	GO:0060460	1	0	1	601	1	18123	NODAL
GO:BP	branching involved in mammary gland duct morphogenesis	GO:0060444	1	0	23	601	1	18123	CAV3
GO:BP	mammary gland morphogenesis	GO:0060443	1	0	45	601	3	18123	ELF3,SOSTDC1,CAV3
GO:BP	epithelial tube branching involved in lung morphogenesis	GO:0060441	1	0	29	601	1	18123	SOX9
GO:BP	trachea development	GO:0060438	1	0	19	601	1	18123	SOX9
GO:BP	bronchus development	GO:0060433	1	0	11	601	1	18123	SOX9
GO:BP	epithelium development	GO:0060429	1	0	1338	601	53	18123	KRT23,PDZD7,KRT19,KRT17,ELF3,SOSTDC1,NODAL,NME2,SULT2B1,VIL1,SOX9,ALDOC,PLEKHA4,EDN1,KRT39,PSMD12,XDH,APCDD1,THRA,KRT16,CAV3,KRT15,PLOD3,IFT20,SIRT6,KRT8,CYP1A1,WNT3,CCDC40,FN3K,RIPK4,GRB2,MMP9,COL18A1,PSMB10,JUP,PSMB3,NGFR,PKHD1,HOXB7,FRAS1,IQGAP3,CYP7B1,SLC9A3R1,STARD13,SFRP2,AKT2,RYR2,STAT5B,PSMC5,SOCS3,ACTG1,RSPO3
GO:BP	lung epithelium development	GO:0060428	1	0	37	601	2	18123	SOX9,THRA
GO:BP	lung morphogenesis	GO:0060425	1	0	50	601	3	18123	NODAL,SOX9,PLOD3
GO:BP	positive regulation of heart growth	GO:0060421	1	0	50	601	2	18123	EDN1,AKAP6
GO:BP	left lung development	GO:0060459	1	0	2	601	1	18123	NODAL
GO:BP	mammary gland bud morphogenesis	GO:0060648	1	0	3	601	1	18123	SOSTDC1
GO:BP	trachea cartilage development	GO:0060534	1	0	8	601	1	18123	SOX9
GO:BP	skeletal muscle organ development	GO:0060538	1	0	171	601	4	18123	CHRND,TLL2,STAC3,LARGE
GO:BP	negative regulation of transcription initiation from RNA polymerase II promoter	GO:0060633	1	0	5	601	1	18123	THRA
GO:BP	regulation of microtubule-based movement	GO:0060632	1	0	54	601	3	18123	TAC4,NEFH,CCDC40
GO:BP	regulation of ER to Golgi vesicle-mediated transport	GO:0060628	1	0	15	601	1	18123	ARF1
GO:BP	regulation of vesicle-mediated transport	GO:0060627	1	0	544	601	25	18123	LGI3,CCL19,LRPAP1,LGALS9,RSPO1,RPH3AL,FER1L5,DGKI,PRKCG,EHD1,CAV3,HLA-F,KLRC2,ITGAM,PTAFR,TFR2,LMAN2,ADCY1,RAC2,SH3GL3,ARF1,SPHK1,CACNA1G,STXBP3,AKT2
GO:BP	tube closure	GO:0060606	1	0	92	601	1	18123	SFRP2
GO:BP	mammary gland duct morphogenesis	GO:0060603	1	0	32	601	2	18123	SOSTDC1,CAV3
GO:BP	branch elongation of an epithelium	GO:0060602	1	0	19	601	1	18123	SOX9
GO:BP	positive regulation of prostaglandin-endoperoxide synthase activity	GO:0060585	1	0	4	601	1	18123	EDN1
GO:BP	regulation of prostaglandin-endoperoxide synthase activity	GO:0060584	1	0	4	601	1	18123	EDN1
GO:BP	muscle tissue development	GO:0060537	1	0	409	601	14	18123	CHRND,SOX9,EDN1,TLL2,NF1,PRKAR1A,CAV3,IFT20,SIRT6,STAC3,PPARA,CACNA1G,AKAP6,RYR2
GO:BP	morphogenesis of an epithelial bud	GO:0060572	1	0	16	601	1	18123	SOSTDC1
GO:BP	neuroepithelial cell differentiation	GO:0060563	1	0	22	601	1	18123	NODAL
GO:BP	epithelial tube morphogenesis	GO:0060562	1	0	334	601	12	18123	SOSTDC1,NODAL,SOX9,EDN1,CAV3,SIRT6,CCDC40,PKHD1,HOXB7,STARD13,SFRP2,RYR2
GO:BP	developmental growth involved in morphogenesis	GO:0060560	1	0	238	601	12	18123	MAPT,ULK2,SOX9,DCLK1,SEMA6C,SIRT6,WNT3,RNF157,UNC13A,NLGN3,SFRP2,ANAPC2
GO:BP	negative regulation of cell death	GO:0060548	1	0	1047	601	45	18123	CCL19,LRPAP1,CCL5,NME2,GRN,VIL1,BRCA1,SOX9,EDN1,ARHGDIA,PLAC8,HSPA5,PRKCG,MTRNR2L2,RAMP2,INSL3,GPX4,HLA-F,STAT3,UBE2Z,PPARA,RNF157,ARNT2,PTRH2,MMP9,PAM16,NGFR,IL7,PKHD1,CASP8,TWIST2,BECN1,SFRP2,SPHK1,CCR7,ANGPT4,AKT2,AATF,DOCK8,STAT5B,PSMC5,IRF7,SOCS3,BCL2L12,PELI3
GO:BP	negative regulation of necrotic cell death	GO:0060547	1	0	26	601	1	18123	CASP8
GO:BP	negative regulation of necroptotic process	GO:0060546	1	0	20	601	1	18123	CASP8
GO:BP	positive regulation of necroptotic process	GO:0060545	1	0	7	601	1	18123	ZBP1
GO:BP	regulation of necroptotic process	GO:0060544	1	0	37	601	2	18123	ZBP1,CASP8
GO:BP	respiratory system development	GO:0060541	1	0	206	601	7	18123	NODAL,SOX9,THRA,PLOD3,TAB1,CCDC40,SIM2
GO:BP	morphogenesis of an epithelial fold	GO:0060571	1	0	24	601	2	18123	SOSTDC1,NODAL
GO:BP	brown fat cell differentiation	GO:0050873	1	0	51	601	2	18123	PLAC8,ADIG
GO:BP	antigen receptor-mediated signaling pathway	GO:0050851	1	0	321	601	11	18123	HLA-DRA,CD79B,PSMD12,CD19,PSMB10,PSMB3,HLA-A,CCR7,HLA-DQA1,PSMC5,MS4A1
GO:BP	positive regulation of B cell activation	GO:0050871	1	0	151	601	3	18123	CD320,IL7,STAT5B
GO:BP	positive regulation of protein catabolic process	GO:0045732	1	0	239	601	4	18123	SOX9,CAV3,SIRT6,PSMC5
GO:BP	respiratory burst	GO:0045730	1	0	35	601	4	18123	GRN,LBP,CD52,RAC2
GO:BP	positive regulation of translation	GO:0045727	1	0	141	601	6	18123	CCL5,KRT17,CTIF,MIF4GD,PTAFR,ERBB2
GO:BP	positive regulation of glycogen biosynthetic process	GO:0045725	1	0	16	601	1	18123	AKT2
GO:BP	positive regulation of cilium assembly	GO:0045724	1	0	23	601	1	18123	CROCC
GO:BP	positive regulation of gluconeogenesis	GO:0045722	1	0	16	601	1	18123	PPARA
GO:BP	negative regulation of fatty acid biosynthetic process	GO:0045717	1	0	23	601	1	18123	BRCA1
GO:BP	negative regulation of glial cell differentiation	GO:0045686	1	0	28	601	3	18123	NR1D1,NF1,TMEM98
GO:BP	regulation of glial cell differentiation	GO:0045685	1	0	77	601	3	18123	NR1D1,NF1,TMEM98
GO:BP	positive regulation of cyclin-dependent protein serine/threonine kinase activity	GO:0045737	1	0	30	601	1	18123	RGCC
GO:BP	positive regulation of epidermis development	GO:0045684	1	0	33	601	2	18123	NME2,SULT2B1
GO:BP	positive regulation of osteoblast differentiation	GO:0045669	1	0	70	601	1	18123	SFRP2
GO:BP	negative regulation of osteoblast differentiation	GO:0045668	1	0	53	601	2	18123	SOX9,TWIST2
GO:BP	regulation of osteoblast differentiation	GO:0045667	1	0	135	601	3	18123	SOX9,TWIST2,SFRP2
GO:BP	positive regulation of neuron differentiation	GO:0045666	1	0	101	601	2	18123	TIMP2,SH3GL3
GO:BP	negative regulation of neuron differentiation	GO:0045665	1	0	70	601	1	18123	SOX9
GO:BP	regulation of neuron differentiation	GO:0045664	1	0	200	601	4	18123	SOX9,TIMP2,SH3GL3,SFRP2
GO:BP	negative regulation of myoblast differentiation	GO:0045662	1	0	24	601	2	18123	SOSTDC1,SOX9
GO:BP	regulation of myoblast differentiation	GO:0045661	1	0	52	601	2	18123	SOSTDC1,SOX9
GO:BP	regulation of monocyte differentiation	GO:0045655	1	0	22	601	1	18123	IRF7
GO:BP	regulation of epidermis development	GO:0045682	1	0	72	601	2	18123	NME2,SULT2B1
GO:BP	regulation of megakaryocyte differentiation	GO:0045652	1	0	83	601	2	18123	ITGA2B,H3F3B
GO:BP	positive regulation of DNA repair	GO:0045739	1	0	74	601	3	18123	BRCA1,PRKCG,DDX11
GO:BP	positive regulation of epidermal growth factor receptor signaling pathway	GO:0045742	1	0	39	601	1	18123	MMP9
GO:BP	negative regulation of gene expression, epigenetic	GO:0045814	1	0	124	601	4	18123	H3F3B,SIRT6,EZH1,HDAC5
GO:BP	positive regulation of endocytosis	GO:0045807	1	0	102	601	4	18123	CCL19,CAV3,TFR2,ARF1
GO:BP	negative regulation of endocytosis	GO:0045806	1	0	53	601	2	18123	LRPAP1,SH3GL3
GO:BP	positive regulation of chromatin assembly or disassembly	GO:0045799	1	0	14	601	1	18123	SIRT6
GO:BP	positive regulation of cell size	GO:0045793	1	0	12	601	1	18123	EDN1
GO:BP	negative regulation of cell size	GO:0045792	1	0	10	601	1	18123	CAV3
GO:BP	positive regulation of cell cycle	GO:0045787	1	0	317	601	13	18123	EDN1,ANAPC11,DBF4B,RPTOR,DDX11,CYP1A1,RAD51C,BECN1,CENPV,SPHK1,STAT5B,RGCC,STXBP4
GO:BP	negative regulation of cell cycle	GO:0045786	1	0	487	601	13	18123	TAOK1,BRCA1,TRIM37,PSMD12,TIMP2,PRKAR1A,EME1,PSMB10,PSMB3,SLC9A3R1,CDK2AP2,PSMC5,RGCC
GO:BP	positive regulation of cell adhesion	GO:0045785	1	0	442	601	24	18123	COL8A1,CCL19,CCL5,LGALS9,RASAL3,HLA-DRA,NODAL,PIK3R6,FRMD5,CYTH3,GRB2,ICOS,PTAFR,JUP,CXCL13,IL7,HLA-A,HLA-DQB1,ERBB2,SFRP2,CCR7,DOCK8,STAT5B,PREX1
GO:BP	positive regulation of DNA replication	GO:0045740	1	0	39	601	2	18123	DBF4B,KAT7
GO:BP	negative regulation of bone resorption	GO:0045779	1	0	17	601	1	18123	TNFRSF11B
GO:BP	negative regulation of blood pressure	GO:0045776	1	0	45	601	4	18123	TAC4,PPARA,PTAFR,SCPEP1
GO:BP	positive regulation of axon extension	GO:0045773	1	0	42	601	2	18123	MAPT,ANAPC2
GO:BP	positive regulation of angiogenesis	GO:0045766	1	0	190	601	11	18123	NODAL,GRN,BRCA1,PIK3R6,RAMP2,SIRT6,STAT3,JUP,SFRP2,SPHK1,ANGPT4
GO:BP	regulation of angiogenesis	GO:0045765	1	0	361	601	17	18123	NODAL,GRN,BRCA1,ENPP2,PIK3R6,NF1,RAMP2,SIRT6,STAT3,ABCC8,JUP,CXCL13,ERBB2,SFRP2,SPHK1,ANGPT4,RGCC
GO:BP	positive regulation of adenylate cyclase activity	GO:0045762	1	0	9	601	2	18123	NF1,TIMP2
GO:BP	regulation of adenylate cyclase activity	GO:0045761	1	0	32	601	4	18123	P2RY13,NF1,TIMP2,NPFFR2
GO:BP	negative regulation of Toll signaling pathway	GO:0045751	1	0	1	601	1	18123	NLRP12
GO:BP	positive regulation of Notch signaling pathway	GO:0045747	1	0	57	601	2	18123	ELF3,STAT3
GO:BP	negative regulation of G protein-coupled receptor signaling pathway	GO:0045744	1	0	55	601	4	18123	CCL5,GRK4,RNF157,ARR3
GO:BP	positive regulation of ossification	GO:0045778	1	0	49	601	1	18123	ATP2B1
GO:BP	positive regulation of gene expression, epigenetic	GO:0045815	1	0	58	601	1	18123	POLR2E
GO:BP	positive regulation of macrophage differentiation	GO:0045651	1	0	17	601	1	18123	CASP8
GO:BP	positive regulation of erythrocyte differentiation	GO:0045648	1	0	32	601	3	18123	STAT3,KAT7,STAT5B
GO:BP	regulation of regulatory T cell differentiation	GO:0045589	1	0	36	601	2	18123	LGALS9,HLA-DRA
GO:BP	positive regulation of gamma-delta T cell differentiation	GO:0045588	1	0	7	601	1	18123	STAT5B
GO:BP	regulation of gamma-delta T cell differentiation	GO:0045586	1	0	9	601	1	18123	STAT5B
GO:BP	positive regulation of T cell differentiation	GO:0045582	1	0	92	601	6	18123	CCL19,LGALS9,HLA-DRA,PIK3R6,IL7,STAT5B
GO:BP	negative regulation of T cell differentiation	GO:0045581	1	0	49	601	1	18123	ERBB2
GO:BP	regulation of T cell differentiation	GO:0045580	1	0	154	601	7	18123	CCL19,LGALS9,HLA-DRA,PIK3R6,IL7,ERBB2,STAT5B
GO:BP	positive regulation of B cell differentiation	GO:0045579	1	0	15	601	2	18123	IL7,STAT5B
GO:BP	regulation of B cell differentiation	GO:0045577	1	0	30	601	2	18123	IL7,STAT5B
GO:BP	mast cell activation	GO:0045576	1	0	63	601	3	18123	LGALS9,PTGDS,RAC2
GO:BP	positive regulation of regulatory T cell differentiation	GO:0045591	1	0	18	601	2	18123	LGALS9,HLA-DRA
GO:BP	regulation of cholesterol biosynthetic process	GO:0045540	1	0	26	601	1	18123	KPNB1
GO:BP	locomotor rhythm	GO:0045475	1	0	16	601	1	18123	ANKFN1
GO:BP	response to ether	GO:0045472	1	0	15	601	2	18123	PTAFR,ABCB4
GO:BP	response to ethanol	GO:0045471	1	0	141	601	4	18123	GGH,STAT3,PPARA,CASP8
GO:BP	cell redox homeostasis	GO:0045454	1	0	43	601	2	18123	LPO,RAC2
GO:BP	bone resorption	GO:0045453	1	0	69	601	5	18123	TNFRSF11B,NF1,PTH1R,IL7,RAC2
GO:BP	endothelial cell differentiation	GO:0045446	1	0	126	601	3	18123	XDH,PLOD3,COL18A1
GO:BP	myoblast differentiation	GO:0045445	1	0	84	601	2	18123	SOSTDC1,SOX9
GO:BP	fat cell differentiation	GO:0045444	1	0	232	601	7	18123	NR1D1,PLAC8,WIF1,DKKL1,ADIG,SFRP2,AKT2
GO:BP	positive regulation of nitric oxide biosynthetic process	GO:0045429	1	0	45	601	2	18123	NOS1AP,EDN1
GO:BP	photoreceptor cell maintenance	GO:0045494	1	0	45	601	2	18123	CROCC,CDH23
GO:BP	regulation of macrophage differentiation	GO:0045649	1	0	25	601	1	18123	CASP8
GO:BP	regulation of cell differentiation	GO:0045595	1	0	1688	601	58	18123	COL1A1,MAPT,NR1D1,CCL19,ITGA2B,LGALS9,HLA-DRA,SOSTDC1,NODAL,NME2,GRN,SULT2B1,SOX9,EDN1,ARHGDIA,PIK3R6,NF1,PSMD12,TIMP2,H3F3B,XDH,RAMP2,SEMA6C,CAV3,ASB4,STAT3,WIF1,HLA-B,WNT3,PPARA,MMP9,DKKL1,PSMB10,TMEM98,ABCC8,ADIG,PSMB3,NGFR,IL7,CASP8,TWIST2,TRIM72,ERBB2,SH3GL3,NME1,KAT7,SFRP2,AKAP6,ANAPC2,PLEKHB1,HDAC5,PTPRD,STAT5B,PSMC5,IRF7,SOCS3,RGCC,PREX1
GO:BP	positive regulation of cell differentiation	GO:0045597	1	0	892	601	33	18123	COL1A1,MAPT,CCL19,LGALS9,HLA-DRA,NME2,SULT2B1,SOX9,EDN1,ARHGDIA,PIK3R6,TIMP2,RAMP2,CAV3,ASB4,STAT3,WIF1,WNT3,DKKL1,ADIG,NGFR,IL7,CASP8,SH3GL3,KAT7,SFRP2,AKAP6,ANAPC2,PTPRD,STAT5B,SOCS3,RGCC,PREX1
GO:BP	negative regulation of erythrocyte differentiation	GO:0045647	1	0	8	601	1	18123	STAT5B
GO:BP	regulation of erythrocyte differentiation	GO:0045646	1	0	46	601	3	18123	STAT3,KAT7,STAT5B
GO:BP	positive regulation of myeloid cell differentiation	GO:0045639	1	0	104	601	4	18123	STAT3,CASP8,KAT7,STAT5B
GO:BP	negative regulation of myeloid cell differentiation	GO:0045638	1	0	91	601	3	18123	NME2,NME1,STAT5B
GO:BP	regulation of myeloid cell differentiation	GO:0045637	1	0	260	601	9	18123	ITGA2B,NME2,H3F3B,STAT3,CASP8,NME1,KAT7,STAT5B,IRF7
GO:BP	positive regulation of T-helper 1 cell differentiation	GO:0045627	1	0	6	601	1	18123	CCL19
GO:BP	regulation of T-helper 1 cell differentiation	GO:0045625	1	0	10	601	1	18123	CCL19
GO:BP	positive regulation of T-helper cell differentiation	GO:0045624	1	0	22	601	1	18123	CCL19
GO:BP	regulation of T-helper cell differentiation	GO:0045622	1	0	39	601	2	18123	CCL19,HLA-DRA
GO:BP	negative regulation of cell differentiation	GO:0045596	1	0	701	601	24	18123	NR1D1,SOSTDC1,NODAL,NME2,SOX9,ARHGDIA,NF1,XDH,SEMA6C,CAV3,STAT3,WNT3,PPARA,MMP9,TMEM98,ABCC8,NGFR,TWIST2,TRIM72,ERBB2,NME1,SFRP2,HDAC5,STAT5B
GO:BP	positive regulation of lymphocyte differentiation	GO:0045621	1	0	106	601	6	18123	CCL19,LGALS9,HLA-DRA,PIK3R6,IL7,STAT5B
GO:BP	regulation of lymphocyte differentiation	GO:0045619	1	0	183	601	7	18123	CCL19,LGALS9,HLA-DRA,PIK3R6,IL7,ERBB2,STAT5B
GO:BP	positive regulation of keratinocyte differentiation	GO:0045618	1	0	20	601	1	18123	NME2
GO:BP	regulation of keratinocyte differentiation	GO:0045616	1	0	44	601	1	18123	NME2
GO:BP	positive regulation of epidermal cell differentiation	GO:0045606	1	0	28	601	2	18123	NME2,SULT2B1
GO:BP	regulation of epidermal cell differentiation	GO:0045604	1	0	65	601	2	18123	NME2,SULT2B1
GO:BP	negative regulation of endothelial cell differentiation	GO:0045602	1	0	13	601	1	18123	XDH
GO:BP	regulation of endothelial cell differentiation	GO:0045601	1	0	50	601	1	18123	XDH
GO:BP	positive regulation of fat cell differentiation	GO:0045600	1	0	68	601	4	18123	WIF1,DKKL1,ADIG,SFRP2
GO:BP	regulation of fat cell differentiation	GO:0045598	1	0	140	601	5	18123	NR1D1,WIF1,DKKL1,ADIG,SFRP2
GO:BP	negative regulation of lymphocyte differentiation	GO:0045620	1	0	58	601	1	18123	ERBB2
GO:BP	regulation of nitric oxide biosynthetic process	GO:0045428	1	0	69	601	2	18123	NOS1AP,EDN1
GO:BP	negative regulation of glycolytic process	GO:0045820	1	0	15	601	3	18123	SLC4A1,STAT3,PPARA
GO:BP	negative regulation of heart contraction	GO:0045822	1	0	26	601	1	18123	ATP1A2
GO:BP	GMP metabolic process	GO:0046037	1	0	16	601	1	18123	XDH
GO:BP	CTP metabolic process	GO:0046036	1	0	16	601	2	18123	NME2,NME1
GO:BP	ATP metabolic process	GO:0046034	1	0	317	601	8	18123	SLC4A4,ALDOC,SLC4A1,COX4I2,STAT3,UQCC3,PPARA,ATP1A2
GO:BP	AMP metabolic process	GO:0046033	1	0	17	601	1	18123	XDH
GO:BP	ADP metabolic process	GO:0046031	1	0	125	601	5	18123	SLC4A4,ALDOC,SLC4A1,STAT3,PPARA
GO:BP	negative regulation of activated T cell proliferation	GO:0046007	1	0	15	601	2	18123	LGALS9,PRKAR1A
GO:BP	regulation of activated T cell proliferation	GO:0046006	1	0	45	601	3	18123	LGALS9,PRKAR1A,STAT5B
GO:BP	regulation of embryonic development	GO:0045995	1	0	64	601	2	18123	NODAL,SFRP2
GO:BP	negative regulation of embryonic development	GO:0045992	1	0	2	601	1	18123	SFRP2
GO:BP	GMP catabolic process	GO:0046038	1	0	3	601	1	18123	XDH
GO:BP	negative regulation of striated muscle contraction	GO:0045988	1	0	8	601	1	18123	ATP1A2
GO:BP	positive regulation of nucleotide metabolic process	GO:0045981	1	0	47	601	3	18123	SLC4A4,STAT3,PPARA
GO:BP	negative regulation of nucleotide metabolic process	GO:0045980	1	0	23	601	3	18123	SLC4A1,STAT3,PPARA
GO:BP	regulation of translation, ncRNA-mediated	GO:0045974	1	0	106	601	1	18123	STAT3
GO:BP	negative regulation of dopamine metabolic process	GO:0045963	1	0	4	601	1	18123	ITGAM
GO:BP	positive regulation of calcium ion-dependent exocytosis	GO:0045956	1	0	19	601	2	18123	ARF1,CACNA1G
GO:BP	negative regulation of calcium ion-dependent exocytosis	GO:0045955	1	0	9	601	1	18123	STXBP3
GO:BP	positive regulation of natural killer cell mediated cytotoxicity	GO:0045954	1	0	25	601	3	18123	HLA-F,KLRC2,STAT5B
GO:BP	negative regulation of natural killer cell mediated cytotoxicity	GO:0045953	1	0	16	601	4	18123	LGALS9,HLA-F,HLA-B,HLA-A
GO:BP	positive regulation of translational initiation	GO:0045948	1	0	30	601	1	18123	CCL5
GO:BP	positive regulation of smooth muscle contraction	GO:0045987	1	0	31	601	3	18123	EDN1,PTAFR,SPHK1
GO:BP	positive regulation of transcription by RNA polymerase III	GO:0045945	1	0	11	601	1	18123	RPTOR
GO:BP	GTP metabolic process	GO:0046039	1	0	25	601	2	18123	NME2,NME1
GO:BP	UTP metabolic process	GO:0046051	1	0	12	601	2	18123	NME2,NME1
GO:BP	regulation of glucose import	GO:0046324	1	0	61	601	3	18123	SLC1A2,STXBP3,AKT2
GO:BP	glucose import	GO:0046323	1	0	76	601	3	18123	SLC1A2,STXBP3,AKT2
GO:BP	negative regulation of fatty acid oxidation	GO:0046322	1	0	12	601	1	18123	SOX9
GO:BP	positive regulation of fatty acid oxidation	GO:0046321	1	0	15	601	2	18123	PPARA,AKT2
GO:BP	regulation of fatty acid oxidation	GO:0046320	1	0	33	601	3	18123	SOX9,PPARA,AKT2
GO:BP	indolalkylamine biosynthetic process	GO:0046219	1	0	5	601	2	18123	ASMT,DDC
GO:BP	nitric oxide metabolic process	GO:0046209	1	0	88	601	2	18123	NOS1AP,EDN1
GO:BP	phenol-containing compound biosynthetic process	GO:0046189	1	0	44	601	1	18123	DDC
GO:BP	polyol biosynthetic process	GO:0046173	1	0	64	601	4	18123	P2RY6,PTH1R,PTAFR,SPHK1
GO:BP	IMP metabolic process	GO:0046040	1	0	16	601	1	18123	XDH
GO:BP	alcohol biosynthetic process	GO:0046165	1	0	148	601	5	18123	P2RY6,PTH1R,KPNB1,PTAFR,SPHK1
GO:BP	purine ribonucleoside catabolic process	GO:0046130	1	0	7	601	1	18123	XDH
GO:BP	purine ribonucleoside metabolic process	GO:0046128	1	0	24	601	1	18123	XDH
GO:BP	nucleobase catabolic process	GO:0046113	1	0	5	601	1	18123	XDH
GO:BP	xanthine metabolic process	GO:0046110	1	0	2	601	1	18123	XDH
GO:BP	inosine metabolic process	GO:0046102	1	0	5	601	1	18123	XDH
GO:BP	adenosine metabolic process	GO:0046085	1	0	11	601	1	18123	XDH
GO:BP	cAMP metabolic process	GO:0046058	1	0	23	601	1	18123	ADCY1
GO:BP	dGMP catabolic process	GO:0046055	1	0	3	601	1	18123	XDH
GO:BP	dGMP metabolic process	GO:0046054	1	0	4	601	1	18123	XDH
GO:BP	pigment biosynthetic process	GO:0046148	1	0	66	601	3	18123	SLC25A39,RPE65,RFC2
GO:BP	positive regulation of glycolytic process	GO:0045821	1	0	25	601	1	18123	SLC4A4
GO:BP	positive regulation of transcription by RNA polymerase II	GO:0045944	1	0	1200	601	34	18123	NR1D1,ELF3,NODAL,NME2,BRCA1,SOX9,EDN1,UHRF1,PLAC8,BPTF,HSPA5,THRA,SUPT4H1,STAT3,ZNF780B,PPARA,ARNT2,JUP,TFR2,NGFR,HOXB7,KAT7,EZH1,SFRP2,HDAC5,AATF,ESRRG,STAT5B,PSMC5,SMARCB1,IRF7,RGCC,BCL2L12,TMPRSS6
GO:BP	positive regulation of steroid metabolic process	GO:0045940	1	0	31	601	1	18123	NR1D1
GO:BP	regulation of RNA polymerase II transcription preinitiation complex assembly	GO:0045898	1	0	14	601	2	18123	THRA,PSMC5
GO:BP	positive regulation of transcription, DNA-templated	GO:0045893	1	0	1623	601	47	18123	COL1A1,NR1D1,UBTF,ZNF341,ELF3,MYRF,NODAL,NME2,BRCA1,SOX9,EDN1,UHRF1,PLAC8,TRIM37,BPTF,HSPA5,MAP2K3,THRA,RPTOR,DDX11,SMARCE1,SUPT4H1,STAT3,ZNF780B,TADA2A,PPARA,ARNT2,JUP,TFR2,CAND2,NGFR,HOXB7,BANP,ERBB2,KAT7,EZH1,SFRP2,HDAC5,AATF,ESRRG,STAT5B,PSMC5,SMARCB1,IRF7,RGCC,BCL2L12,TMPRSS6
GO:BP	negative regulation of transcription, DNA-templated	GO:0045892	1	0	1339	601	36	18123	NR1D1,SP2,ELF3,NODAL,BRCA1,ZNF529,SOX9,ZNF541,EDN1,MYT1L,UHRF1,TRIM37,BPTF,H3F3B,THRA,MBTD1,SMARCE1,SUPT4H1,SIRT6,STAT3,PPARA,IFI27,ZBTB26,RPL23,TWIST2,KAT7,NPAS1,CENPV,EZH1,SFRP2,MBD3,HDAC5,PSMC5,IRF7,SIM2,TMPRSS6
GO:BP	positive regulation of smoothened signaling pathway	GO:0045880	1	0	37	601	1	18123	RAB34
GO:BP	positive regulation of sister chromatid cohesion	GO:0045876	1	0	9	601	1	18123	DDX11
GO:BP	positive regulation of proteolysis	GO:0045862	1	0	383	601	17	18123	MAPT,CLDN4,LGALS9,NODAL,GRN,SPON1,XDH,CAV3,SIRT6,STAT3,TNFSF15,NGFR,CASP8,PCOLCE,SFRP2,NLRP12,PSMC5
GO:BP	negative regulation of proteolysis	GO:0045861	1	0	356	601	11	18123	CPAMD8,VIL1,TIMP2,PRKCG,UBE2Z,MMP9,TMEM98,NGFR,RPL23,SFRP2,BCL2L12
GO:BP	positive regulation of protein kinase activity	GO:0045860	1	0	537	601	23	18123	CCL19,CCL5,TAOK1,FGD2,EDN1,PIK3R6,MAP2K3,DBF4B,PRKAR1A,RPTOR,TAB1,LILRA5,CARD10,TNFSF15,MUC20,MST1R,GADD45B,IQGAP3,ADCY1,ERBB2,CCR7,ANGPT4,RGCC
GO:BP	regulation of protein kinase activity	GO:0045859	1	0	809	601	35	18123	CCL19,DUSP14,CCL5,TAOK1,FGD2,EDN1,PIK3R6,NF1,MAP2K3,DBF4B,PRKAR1A,RPTOR,CAV3,NPFFR2,CCNJ,TRPT1,TAB1,LILRA5,CARD10,TNFSF15,MUC20,MST1R,GADD45B,IQGAP3,ADCY1,GPS1,SLC9A3R1,ERBB2,RAC2,SFRP2,CCR7,ANGPT4,PPP1R1B,SOCS3,RGCC
GO:BP	positive regulation of RNA polymerase II transcription preinitiation complex assembly	GO:0045899	1	0	11	601	1	18123	PSMC5
GO:BP	pH elevation	GO:0045852	1	0	7	601	1	18123	SLC4A1
GO:BP	positive regulation of mitotic metaphase/anaphase transition	GO:0045842	1	0	14	601	1	18123	ANAPC11
GO:BP	positive regulation of mitotic nuclear division	GO:0045840	1	0	43	601	4	18123	EDN1,ANAPC11,SPHK1,RGCC
GO:BP	positive regulation of membrane potential	GO:0045838	1	0	17	601	1	18123	AKT2
GO:BP	negative regulation of membrane potential	GO:0045837	1	0	15	601	1	18123	MAPT
GO:BP	negative regulation of meiotic nuclear division	GO:0045835	1	0	10	601	1	18123	PRKAR1A
GO:BP	positive regulation of lipid metabolic process	GO:0045834	1	0	155	601	6	18123	NR1D1,CCL19,CD19,PPARA,CCR7,AKT2
GO:BP	negative regulation of lipid metabolic process	GO:0045833	1	0	107	601	5	18123	BRCA1,SOX9,DKKL1,PIP4K2B,SPHK1
GO:BP	negative regulation of innate immune response	GO:0045824	1	0	71	601	8	18123	LGALS9,GRN,DHX58,HLA-F,HLA-B,HLA-A,DCST1,TTLL12
GO:BP	positive regulation of heart contraction	GO:0045823	1	0	40	601	3	18123	EDN1,ATP1A2,RYR2
GO:BP	pH reduction	GO:0045851	1	0	59	601	3	18123	CA7,TMEM199,GRN
GO:BP	positive regulation of transcription by RNA polymerase I	GO:0045943	1	0	23	601	4	18123	UBTF,DDX11,ERBB2,SMARCB1
GO:BP	positive regulation of vasoconstriction	GO:0045907	1	0	35	601	1	18123	PTAFR
GO:BP	negative regulation of carbohydrate metabolic process	GO:0045912	1	0	53	601	3	18123	SLC4A1,STAT3,PPARA
GO:BP	negative regulation of steroid metabolic process	GO:0045939	1	0	31	601	1	18123	DKKL1
GO:BP	positive regulation of phosphate metabolic process	GO:0045937	1	0	1003	601	40	18123	MAPT,CCL19,CCL5,P2RY6,NODAL,RSPO1,TAOK1,SLC4A4,ENPP2,SOX9,FGD2,EDN1,PIK3R6,MAP2K3,DBF4B,PRKAR1A,RPTOR,CD19,STAT3,PTH1R,TAB1,LILRA5,PPARA,CARD10,PTAFR,MMP9,TNFSF15,MUC20,MST1R,GADD45B,IQGAP3,ADCY1,ERBB2,SFRP2,SPHK1,CCR7,ANGPT4,AKT2,SOCS3,RGCC
GO:BP	negative regulation of phosphate metabolic process	GO:0045936	1	0	543	601	20	18123	MAPT,PPP1R9B,DUSP14,SLC4A1,TSKS,NF1,XDH,PRKAR1A,RPTOR,CAV3,STAT3,PPARA,GADD45B,GPS1,PIP4K2B,SFRP2,NLRP12,PPP1R27,PPP1R1B,SOCS3
GO:BP	positive regulation of nucleobase-containing compound metabolic process	GO:0045935	1	0	1943	601	55	18123	COL1A1,NR1D1,UBTF,ZNF341,ELF3,MYRF,NODAL,NME2,BRCA1,SRSF1,SLC4A4,SOX9,EDN1,UHRF1,PLAC8,TRIM37,BPTF,HSPA5,MAP2K3,PRKCG,THRA,RPTOR,DDX11,SMARCE1,SUPT4H1,SIRT6,STAT3,ZNF780B,TADA2A,PPARA,ARNT2,SLX4,RFC2,JUP,TFR2,CAND2,NGFR,NT5C3B,HOXB7,PATL1,BANP,ERBB2,KAT7,EZH1,SFRP2,HDAC5,AATF,ESRRG,STAT5B,PSMC5,SMARCB1,IRF7,RGCC,BCL2L12,TMPRSS6
GO:BP	negative regulation of nucleobase-containing compound metabolic process	GO:0045934	1	0	1569	601	43	18123	NR1D1,SP2,ELF3,NODAL,TEN1,BRCA1,ZNF529,SOX9,POLR2E,ZNF541,EDN1,MYT1L,SLC4A1,UHRF1,TRIM37,BPTF,H3F3B,THRA,IGF2BP1,MBTD1,SMARCE1,SUPT4H1,SIRT6,STAT3,PPARA,SLX4,IFI27,PAM16,ZBTB26,DHX34,RPL23,TWIST2,KAT7,NPAS1,CENPV,EZH1,SFRP2,MBD3,HDAC5,PSMC5,IRF7,SIM2,TMPRSS6
GO:BP	positive regulation of muscle contraction	GO:0045933	1	0	46	601	3	18123	EDN1,PTAFR,SPHK1
GO:BP	negative regulation of muscle contraction	GO:0045932	1	0	25	601	1	18123	ATP1A2
GO:BP	positive regulation of mitotic cell cycle	GO:0045931	1	0	118	601	8	18123	ANAPC11,DBF4B,RPTOR,CYP1A1,RAD51C,SPHK1,STAT5B,RGCC
GO:BP	negative regulation of mitotic cell cycle	GO:0045930	1	0	318	601	11	18123	TAOK1,BRCA1,PSMD12,TIMP2,EME1,PSMB10,PSMB3,SLC9A3R1,CDK2AP2,PSMC5,RGCC
GO:BP	negative regulation of DNA recombination	GO:0045910	1	0	76	601	1	18123	POLR2E
GO:BP	positive regulation of growth	GO:0045927	1	0	272	601	18	18123	MAPT,KRT17,VIL1,EDN1,H3F3B,GPR21,RPTOR,WNT3,RNF157,UNC13A,IL7,TSHR,ERBB2,SFRP2,SPHK1,AKAP6,ANAPC2,STAT5B
GO:BP	positive regulation of female receptivity	GO:0045925	1	0	3	601	1	18123	THRA
GO:BP	regulation of female receptivity	GO:0045924	1	0	8	601	2	18123	THRA,PPP1R1B
GO:BP	positive regulation of fatty acid metabolic process	GO:0045923	1	0	38	601	2	18123	PPARA,AKT2
GO:BP	negative regulation of fatty acid metabolic process	GO:0045922	1	0	40	601	2	18123	BRCA1,SOX9
GO:BP	positive regulation of exocytosis	GO:0045921	1	0	88	601	6	18123	HLA-F,KLRC2,ITGAM,PTAFR,ARF1,CACNA1G
GO:BP	negative regulation of exocytosis	GO:0045920	1	0	33	601	3	18123	LGALS9,HLA-F,STXBP3
GO:BP	positive regulation of cytolysis	GO:0045919	1	0	1	601	1	18123	LBP
GO:BP	negative regulation of catecholamine metabolic process	GO:0045914	1	0	4	601	1	18123	ITGAM
GO:BP	positive regulation of carbohydrate metabolic process	GO:0045913	1	0	81	601	6	18123	P2RY6,SLC4A4,PTH1R,PPARA,PTAFR,AKT2
GO:BP	negative regulation of growth	GO:0045926	1	0	254	601	9	18123	PPP1R9B,TLL2,PLAC8,SEMA6C,CAV3,WNT3,PPARA,MT1M,SFRP2
GO:BP	positive regulation of MHC class I biosynthetic process	GO:0045345	1	0	6	601	1	18123	NLRP12
GO:BP	regulation of MHC class I biosynthetic process	GO:0045343	1	0	8	601	1	18123	NLRP12
GO:BP	MHC class I biosynthetic process	GO:0045341	1	0	8	601	1	18123	NLRP12
GO:BP	regulation of respiratory system process	GO:0044065	1	0	16	601	2	18123	NLGN3,ATP1A2
GO:BP	regulation of excretion	GO:0044062	1	0	24	601	3	18123	EDN1,CORIN,SLC9A3R1
GO:BP	regulation of system process	GO:0044057	1	0	621	601	27	18123	SGCA,SLN,MYRF,NOS1AP,SCN4A,CNN1,KCND1,TAC4,EDN1,THRA,CAV3,ATP2B1,PPARA,FXYD7,PTAFR,NLGN3,TMEM98,ABCC8,JUP,CORIN,ATP1A2,SLC9A3R1,BECN1,SPHK1,CACNA1G,AKAP6,RYR2
GO:BP	glucan metabolic process	GO:0044042	1	0	80	601	4	18123	NR1D1,GYG2,KHK,AKT2
GO:BP	regulation of DNA methylation	GO:0044030	1	0	30	601	2	18123	BRCA1,MBD3
GO:BP	modulation by symbiont of host process	GO:0044003	1	0	60	601	3	18123	ULK2,KPNB1,CASP8
GO:BP	histone H4-R3 methylation	GO:0043985	1	0	6	601	1	18123	COPRS
GO:BP	histone H4-K16 acetylation	GO:0043984	1	0	19	601	1	18123	BRCA1
GO:BP	histone H4-K12 acetylation	GO:0043983	1	0	7	601	1	18123	KAT7
GO:BP	modulation by symbiont of host cellular process	GO:0044068	1	0	35	601	3	18123	ULK2,KPNB1,CASP8
GO:BP	histone H4-K8 acetylation	GO:0043982	1	0	15	601	1	18123	KAT7
GO:BP	histone H3-K9 acetylation	GO:0043970	1	0	13	601	2	18123	BRCA1,SMARCB1
GO:BP	histone H4 acetylation	GO:0043967	1	0	66	601	4	18123	BRCA1,NAA60,KAT7,SMARCB1
GO:BP	histone H3 acetylation	GO:0043966	1	0	60	601	4	18123	BRCA1,NAA60,KAT7,SMARCB1
GO:BP	negative regulation of cAMP-mediated signaling	GO:0043951	1	0	17	601	1	18123	RNF157
GO:BP	positive regulation of cAMP-mediated signaling	GO:0043950	1	0	18	601	1	18123	INSL3
GO:BP	regulation of cAMP-mediated signaling	GO:0043949	1	0	43	601	3	18123	INSL3,PRKAR1A,RNF157
GO:BP	protein-containing complex subunit organization	GO:0043933	1	0	2017	601	69	18123	MAPT,HIGD1B,CENPM,UBTF,PPP1R9B,MRPL38,SLN,TMEM199,ATPAF2,HLA-DRA,MRPL27,TAOK1,TMC8,KCND1,VIL1,SRSF1,PTGES3L,SOX9,NAA60,RPL38,DHX8,SLC1A2,PSMD12,BPTF,H3F3B,HSPA5,CHAF1A,ADD2,THRA,EHD1,SMARCE1,CAV3,GPX4,UQCC3,GOSR2,PRND,CCDC40,TBCD,CARD10,GRB2,UNC13A,MRPL55,PSMB10,CXCL13,PSMB3,CAND2,TMOD4,MRPS23,RPL23,ARHGAP18,RAD51C,CASP8,SLC9A3R1,LIN7A,TRIM72,ARF1,COIL,LUC7L3,CENPV,TRPM2,SLC7A9,MRPL2,CCR7,ANGPT4,…
GO:BP	exonucleolytic catabolism of deadenylated mRNA	GO:0043928	1	0	33	601	2	18123	NT5C3B,PATL1
GO:BP	positive regulation by host of viral transcription	GO:0043923	1	0	16	601	1	18123	SMARCB1
GO:BP	histone H4-K5 acetylation	GO:0043981	1	0	15	601	1	18123	KAT7
GO:BP	negative regulation by host of viral transcription	GO:0043922	1	0	15	601	1	18123	CCL5
GO:BP	regulation of anion transport	GO:0044070	1	0	92	601	4	18123	CA7,EDN1,PTAFR,ATP1A2
GO:BP	regulation of cellular component biogenesis	GO:0044087	1	0	991	601	36	18123	MAPT,CCL19,TMC8,VIL1,BRCA1,SOX9,CROCC,TRIM37,HSPA5,ADD2,THRA,CAV3,IFT20,SIRT6,SYNPO2L,TBCD,SLX4,GRB2,NLGN3,CXCL13,TMOD4,RABEP2,ARHGAP18,BECN1,RAC2,PIP4K2B,ARF1,TRPM2,SPHK1,CCR7,PTPRD,FLII,PSMC5,RGCC,PREX1,ACTG1
GO:BP	cellular nitrogen compound catabolic process	GO:0044270	1	0	623	601	19	18123	CTIF,CASC3,RPL38,RPL19,PSMD12,XDH,IGF2BP1,KPNB1,PSMB10,PSMB3,PAM16,RPL27,NT5C3B,DHX34,RPL23,PATL1,ALKBH5,IGF2BP2,PSMC5
GO:BP	cellular protein metabolic process	GO:0044267	1	0	5280	601	174	18123	MAPT,NR1D1,EIF1,CLDN4,PPP1R9B,MRPL38,CCL19,IGFBP4,DUSP14,CCL5,TRIM47,KRT17,TMEM199,LGALS9,MUC17,CPAMD8,NODAL,NME2,NOS1AP,ADRBK2,MRPL27,RSPO1,TAOK1,GRK4,GRN,COPRS,CLPP,VIL1,UNK,BRCA1,ULK2,RNF43,TENC1,UBAP1L,EPB42,AARSD1,ENPP2,SOX9,FGD2,CTIF,ANKK1,CASC3,NAA60,ZNF541,MUC3A,EDN1,ANAPC11,RPL38,DCLK1,RPL19,UHRF1,PIK3R6,NF1,CSF2RA,SPON1,TRIM37,CCDC47,PSMD12,TIMP2,FDXR,HSPA5,APOL1,XDH,MAP2K3,PRKCG,TTLL1,…
GO:BP	cellular macromolecule catabolic process	GO:0044265	1	0	1244	601	40	18123	NR1D1,TMEM199,CLPP,RNF43,UBAP1L,CTIF,CASC3,ANAPC11,RPL38,RPL19,UHRF1,CCDC47,PSMD12,HSPA5,PRKCG,IGF2BP1,MVB12A,CAV3,SIRT6,UBE2Z,KPNB1,PSMB10,IFI27,VPS13A,PSMB3,PAM16,RPL27,NT5C3B,DHX34,RPL23,DCST1,CASP8,PATL1,ALKBH5,TRIM72,IGF2BP2,USP36,UBXN11,ANAPC2,PSMC5
GO:BP	cellular polysaccharide metabolic process	GO:0044264	1	0	108	601	4	18123	NR1D1,GYG2,KHK,AKT2
GO:BP	cellular carbohydrate metabolic process	GO:0044262	1	0	301	601	12	18123	NR1D1,SLC5A3,IGFBP4,P2RY6,GYG2,SLC4A1,KHK,STAT3,PTH1R,PPARA,PTAFR,AKT2
GO:BP	cellular macromolecule metabolic process	GO:0044260	1	0	8430	601	248	18123	COL1A1,MAPT,NR1D1,EIF1,CLDN4,UBTF,PPP1R9B,ZNF341,MRPL38,CCL19,LRPAP1,PHRF1,IGFBP4,DUSP14,CCL5,TRIM47,KRT17,TMEM199,LGALS9,SP2,ELF3,MUC17,CPAMD8,MYRF,NODAL,NME2,NCAN,NOS1AP,ADRBK2,MRPL27,RSPO1,TAOK1,GRK4,GRN,COPRS,GYG2,TEN1,CLPP,VIL1,UNK,BRCA1,ULK2,RNF43,ZNF529,SAP30BP,TENC1,UBAP1L,EPB42,AARSD1,ENPP2,DAND5,SOX9,FGD2,CTIF,ANKK1,RFX2,POLR2E,ZNF682,CASC3,NAA60,ZNF541,MUC3A,EDN1,ANAPC11,RPL38,MYT1L,DC…
GO:BP	cellular protein catabolic process	GO:0044257	1	0	822	601	27	18123	NR1D1,TMEM199,CLPP,RNF43,UBAP1L,ANAPC11,UHRF1,CCDC47,PSMD12,HSPA5,PRKCG,MVB12A,CAV3,SIRT6,UBE2Z,PSMB10,IFI27,VPS13A,PSMB3,RPL23,DCST1,CASP8,TRIM72,USP36,UBXN11,ANAPC2,PSMC5
GO:BP	cellular lipid metabolic process	GO:0044255	1	0	1079	601	35	18123	BRCA1,ENPP2,SOX9,GPC2,PLEKHA4,TTR,EDN1,DGKI,PIK3R6,PTGDS,GDPD1,PGAP3,CAV3,GPX4,RPE65,CYP1A1,PPARA,TPTE2,LPPR2,ST8SIA5,ACSM5,LARGE,PITPNM3,PLA2G4D,PLA2G4F,CYP3A7,PIP4K2B,CYP2C9,ARF1,DHRS7B,SPHK1,AKT2,SCPEP1,TEX2,SOCS3
GO:BP	cellular biosynthetic process	GO:0044249	1	0	6210	601	171	18123	COL1A1,NR1D1,EIF1,UBTF,ZNF341,MRPL38,CCL19,PHRF1,CCL5,KRT17,LGALS9,SP2,P2RY6,ELF3,MUC17,MYRF,NODAL,NME2,NCAN,NOS1AP,MRPL27,GYG2,TEN1,UNK,BRCA1,ZNF529,SAP30BP,AARSD1,DAND5,SOX9,CTIF,RFX2,POLR2E,ZNF682,CASC3,PLEKHA4,ZNF541,MUC3A,EDN1,RPL38,MYT1L,DGKI,SLC1A2,RPL19,UHRF1,PIK3R6,PLAC8,TRIM37,PSMD12,BPTF,ACAN,FDXR,SLC25A39,AK7,H3F3B,HSPA5,XDH,MAP2K3,CHAF1A,PTGDS,NWD1,DBF4B,ZNF710,NMT1,THRA,PGAP3,PRKAR1…
GO:BP	cellular component biogenesis	GO:0044085	1	0	3377	601	108	18123	MAPT,HIGD1B,CENPM,CLDN4,UBTF,PPP1R9B,DDX52,ITGB4,KRT19,CCL19,TMEM199,ATPAF2,HLA-DRA,TMC8,KCND1,VIL1,BRCA1,SRSF1,PTGES3L,SOX9,FGD2,RFX2,CROCC,NAA60,RAB34,EDN1,RPL38,NEFH,KIRREL3,SLC1A2,RPL19,TRIM37,PSMD12,RAB43,H3F3B,HSPA5,XDH,CHAF1A,ADD2,TTLL1,THRA,RAMP2,PRKAR1A,MVB12A,EHD1,CAV3,GPX4,PLOD3,IFT20,SIRT6,KRT8,UQCC3,GOSR2,PRND,CCDC40,SYNPO2L,TBCD,KPNB1,SLX4,CARD10,GRB2,UNC13A,NLGN3,PSMB10,JUP,CXCL13,…
GO:BP	cellular catabolic process	GO:0044248	1	0	2381	601	71	18123	MAPT,NR1D1,ITGB4,TMEM199,ERAP2,NCAN,CLPP,ULK2,RNF43,UBAP1L,SLC4A4,ENPP2,DCXR,CTIF,CASC3,ANAPC11,RPL38,SARDH,HBA2,RPL19,UHRF1,CCDC47,PSMD12,ACAN,TIMP2,RAB43,HSPA5,XDH,PRKCG,GDPD1,IGF2BP1,MVB12A,RPTOR,LPO,CAV3,IFT20,SIRT6,STAT3,BGN,CYP1A1,UBE2Z,PPARA,KPNB1,PSMB10,IFI27,VPS13A,PSMB3,PAM16,RPL27,NT5C3B,WIPI1,DHX34,RPL23,DCST1,CASP8,PATL1,ALKBH5,PLA2G4D,TRIM72,BECN1,PLA2G4F,IGF2BP2,PIP4K2B,USP36,CYP2C…
GO:BP	primary metabolic process	GO:0044238	1	0	10642	601	318	18123	COL1A1,MAPT,NR1D1,EIF1,CLDN4,UBTF,ADAMDEC1,PPP1R9B,ZNF341,DDX52,MRPL38,SLC5A3,CCL19,PHRF1,IGFBP4,DUSP14,CCL5,TRIM47,KRT17,PRSS38,TMEM199,LGALS9,ERAP2,NSRP1,SP2,P2RY6,ELF3,MUC17,CPAMD8,MYRF,NODAL,NME2,NCAN,NOS1AP,ADRBK2,MRPL27,RSPO1,TAOK1,GRK4,GRN,ADAM2,COPRS,GYG2,TEN1,SULT2B1,CLPP,VIL1,UNK,BRCA1,ULK2,RNF43,ZNF529,SRSF1,TPSB2,SAP30BP,TENC1,UBAP1L,EPB42,AARSD1,SLC4A4,ENPP2,DAND5,DCXR,SOX9,GPC2,FGD2…
GO:BP	cellular metabolic process	GO:0044237	1	0	10941	601	324	18123	COL1A1,MAPT,NR1D1,EIF1,CLDN4,UBTF,PPP1R9B,ZNF341,DDX52,MRPL38,ITGB4,CA7,SLC5A3,CCL19,LRPAP1,PHRF1,IGFBP4,DUSP14,CCL5,TRIM47,KRT17,TMEM199,LGALS9,ERAP2,NSRP1,SP2,P2RY6,ELF3,MUC17,CPAMD8,MYRF,NODAL,NME2,NCAN,NOS1AP,ADRBK2,MRPL27,RSPO1,TAOK1,GRK4,GRN,COPRS,GYG2,TEN1,SULT2B1,CLPP,VIL1,UNK,BRCA1,NRROS,ULK2,RNF43,ZNF529,SRSF1,SAP30BP,TENC1,UBAP1L,EPB42,AARSD1,SLC4A4,ENPP2,DAND5,DCXR,SOX9,GPC2,FGD2,CTIF…
GO:BP	histone H3-K14 acetylation	GO:0044154	1	0	14	601	1	18123	KAT7
GO:BP	cellular amine metabolic process	GO:0044106	1	0	166	601	9	18123	SARDH,PSMD12,GDPD1,ITGAM,ASMT,PSMB10,PSMB3,DDC,PSMC5
GO:BP	negative regulation of molecular function	GO:0044092	1	0	1228	601	45	18123	MAPT,PPP1R9B,CCL23,SLN,LRPAP1,DUSP14,P2RY13,CPAMD8,TMC8,TEN1,VIL1,DGKI,SLC4A1,TSKS,NF1,TRIM37,TIMP2,NWD1,MTRNR2L2,PRKAR1A,RPTOR,DDX11,CAV3,UBE2Z,PPARA,MMP9,DKKL1,PAM16,NGFR,IL7,PKHD1,GADD45B,RPL23,CASP8,ATP1A2,GPS1,SLC9A3R1,NOSIP,PIP4K2B,SFRP2,NLRP12,PPP1R27,PPP1R1B,SOCS3,BCL2L12
GO:BP	membrane biogenesis	GO:0044091	1	0	97	601	4	18123	CAV3,KPNB1,NLGN3,PTPRD
GO:BP	positive regulation of vacuole organization	GO:0044090	1	0	13	601	3	18123	GRN,BECN1,PIP4K2B
GO:BP	positive regulation of cellular component biogenesis	GO:0044089	1	0	546	601	20	18123	MAPT,CCL19,VIL1,SOX9,CROCC,CAV3,SIRT6,SYNPO2L,SLX4,GRB2,NLGN3,CXCL13,BECN1,RAC2,PIP4K2B,ARF1,CCR7,PTPRD,PSMC5,RGCC
GO:BP	regulation of vacuole organization	GO:0044088	1	0	49	601	4	18123	GRN,IFT20,BECN1,PIP4K2B
GO:BP	cellular lipid catabolic process	GO:0044242	1	0	231	601	7	18123	ENPP2,GDPD1,PPARA,PLA2G4D,PLA2G4F,SPHK1,AKT2
GO:BP	cellular nitrogen compound biosynthetic process	GO:0044271	1	0	5054	601	126	18123	COL1A1,NR1D1,EIF1,UBTF,ZNF341,MRPL38,PHRF1,CCL5,KRT17,LGALS9,SP2,ELF3,MYRF,NODAL,NME2,NOS1AP,MRPL27,TEN1,UNK,BRCA1,ZNF529,SAP30BP,AARSD1,DAND5,SOX9,CTIF,RFX2,POLR2E,ZNF682,CASC3,ZNF541,EDN1,RPL38,MYT1L,SLC1A2,RPL19,UHRF1,PLAC8,TRIM37,PSMD12,BPTF,SLC25A39,AK7,H3F3B,HSPA5,XDH,MAP2K3,NWD1,ZNF710,THRA,PRKAR1A,IGF2BP1,RPTOR,ZNF35,DDX11,MBTD1,SMARCE1,SUPT4H1,SIRT6,SSX4B,STAT3,ZNF780B,UQCC3,PAPSS2,TADA2…
GO:BP	regulation of biological process involved in symbiotic interaction	GO:0043903	1	0	79	601	1	18123	LGALS9
GO:BP	regulation of phosphoprotein phosphatase activity	GO:0043666	1	0	120	601	3	18123	PPP1R9B,PPP1R27,PPP1R1B
GO:BP	regulation of kinase activity	GO:0043549	1	0	920	601	38	18123	MAPT,CCL19,DUSP14,CCL5,TAOK1,FGD2,EDN1,PIK3R6,NF1,MAP2K3,DBF4B,PRKAR1A,RPTOR,CAV3,NPFFR2,CD19,CCNJ,TRPT1,TAB1,LILRA5,CARD10,TNFSF15,MUC20,MST1R,GADD45B,IQGAP3,ADCY1,GPS1,SLC9A3R1,ERBB2,RAC2,PIP4K2B,SFRP2,CCR7,ANGPT4,PPP1R1B,SOCS3,RGCC
GO:BP	protein acylation	GO:0043543	1	0	248	601	11	18123	MAPT,TAOK1,BRCA1,NAA60,NMT1,TADA2A,KAT7,MBD3,SPHK1,SMARCB1,NAT9
GO:BP	endothelial cell migration	GO:0043542	1	0	291	601	11	18123	GRN,EDN1,NF1,MAP2K3,CARD10,JUP,CXCL13,STARD13,HDAC5,ANGPT4,RGCC
GO:BP	negative regulation of blood vessel endothelial cell migration	GO:0043537	1	0	87	601	6	18123	CARD10,JUP,STARD13,HDAC5,ANGPT4,RGCC
GO:BP	positive regulation of blood vessel endothelial cell migration	GO:0043536	1	0	79	601	2	18123	MAP2K3,ANGPT4
GO:BP	regulation of blood vessel endothelial cell migration	GO:0043535	1	0	163	601	8	18123	NF1,MAP2K3,CARD10,JUP,STARD13,HDAC5,ANGPT4,RGCC
GO:BP	blood vessel endothelial cell migration	GO:0043534	1	0	187	601	8	18123	NF1,MAP2K3,CARD10,JUP,STARD13,HDAC5,ANGPT4,RGCC
GO:BP	positive regulation of neuron apoptotic process	GO:0043525	1	0	60	601	3	18123	GRN,NF1,ITGAM
GO:BP	negative regulation of neuron apoptotic process	GO:0043524	1	0	152	601	2	18123	GRN,PRKCG
GO:BP	regulation of lipid kinase activity	GO:0043550	1	0	70	601	6	18123	CCL19,PIK3R6,CD19,PIP4K2B,CCR7,SOCS3
GO:BP	regulation of neuron apoptotic process	GO:0043523	1	0	219	601	4	18123	GRN,NF1,PRKCG,ITGAM
GO:BP	positive regulation of JUN kinase activity	GO:0043507	1	0	71	601	4	18123	CCL19,TAOK1,FGD2,EDN1
GO:BP	regulation of JUN kinase activity	GO:0043506	1	0	87	601	5	18123	CCL19,TAOK1,FGD2,EDN1,SFRP2
GO:BP	regulation of muscle adaptation	GO:0043502	1	0	104	601	6	18123	SGCA,EDN1,CAV3,PPARA,BECN1,AKAP6
GO:BP	muscle adaptation	GO:0043500	1	0	127	601	6	18123	SGCA,EDN1,CAV3,PPARA,BECN1,AKAP6
GO:BP	protein kinase B signaling	GO:0043491	1	0	289	601	18	18123	CCL19,CCL5,SOX9,XDH,CAV3,CD19,PPARA,TPTE2,GRB2,ICOS,MST1R,PKHD1,SLC9A3R1,ERBB2,RAC2,PEAR1,CCR7,AKT2
GO:BP	RNA stabilization	GO:0043489	1	0	66	601	1	18123	IGF2BP1
GO:BP	regulation of mRNA stability	GO:0043488	1	0	247	601	9	18123	PSMD12,IGF2BP1,PSMB10,PSMB3,NT5C3B,PATL1,ALKBH5,IGF2BP2,PSMC5
GO:BP	regulation of RNA stability	GO:0043487	1	0	259	601	9	18123	PSMD12,IGF2BP1,PSMB10,PSMB3,NT5C3B,PATL1,ALKBH5,IGF2BP2,PSMC5
GO:BP	histone exchange	GO:0043486	1	0	71	601	2	18123	CENPM,H3F3B
GO:BP	negative regulation of JUN kinase activity	GO:0043508	1	0	16	601	1	18123	SFRP2
GO:BP	post-translational protein modification	GO:0043687	1	0	362	601	12	18123	IGFBP4,PSMD12,APOL1,ASB4,FN3K,PSMB10,PSMB3,GPS1,PRKCSH,PSMC5,SOCS3,DCAF4
GO:BP	regulation of phosphatidylinositol 3-kinase activity	GO:0043551	1	0	58	601	5	18123	CCL19,PIK3R6,CD19,CCR7,SOCS3
GO:BP	cellular response to nitrogen levels	GO:0043562	1	0	12	601	1	18123	BECN1
GO:BP	recognition of apoptotic cell	GO:0043654	1	0	7	601	1	18123	PEAR1
GO:BP	engulfment of apoptotic cell	GO:0043652	1	0	19	601	2	18123	BECN1,RAC2
GO:BP	dicarboxylic acid metabolic process	GO:0043648	1	0	99	601	1	18123	SLC46A1
GO:BP	inositol phosphate metabolic process	GO:0043647	1	0	73	601	4	18123	P2RY6,PLCH1,PTH1R,PTAFR
GO:BP	modification-dependent macromolecule catabolic process	GO:0043632	1	0	681	601	21	18123	RNF43,UBAP1L,ANAPC11,UHRF1,CCDC47,PSMD12,HSPA5,MVB12A,CAV3,SIRT6,UBE2Z,PSMB10,IFI27,PSMB3,RPL23,DCST1,TRIM72,USP36,UBXN11,ANAPC2,PSMC5
GO:BP	response to estrogen	GO:0043627	1	0	79	601	5	18123	TNFRSF11B,KRT19,BRCA1,TSHB,SLC34A2
GO:BP	cellular protein complex disassembly	GO:0043624	1	0	228	601	12	18123	PPP1R9B,MRPL38,SLN,MRPL27,TAOK1,VIL1,ADD2,MRPL55,TMOD4,MRPS23,MRPL2,FLII
GO:BP	regulation of DNA-templated transcription in response to stress	GO:0043620	1	0	117	601	5	18123	PSMD12,HSPA5,PSMB10,PSMB3,PSMC5
GO:BP	regulation of transcription from RNA polymerase II promoter in response to stress	GO:0043618	1	0	111	601	5	18123	PSMD12,HSPA5,PSMB10,PSMB3,PSMC5
GO:BP	positive regulation of phosphatidylinositol 3-kinase activity	GO:0043552	1	0	33	601	3	18123	CCL19,CD19,CCR7
GO:BP	keratinocyte proliferation	GO:0043616	1	0	50	601	1	18123	STXBP4
GO:BP	cellular amide metabolic process	GO:0043603	1	0	1284	601	40	18123	EIF1,MRPL38,CCL5,KRT17,ERAP2,MRPL27,UNK,AARSD1,CTIF,CASC3,RPL38,SLC1A2,RPL19,SPON1,IGF2BP1,GPX4,STAT3,MIF4GD,ASMT,ACSM5,PTAFR,MRPL55,EEFSEC,TSHB,RPL27,NT5C3B,MRPS23,RPL23,PATL1,CORIN,SLC46A1,ERBB2,BECN1,IGF2BP2,CYP2C9,SPHK1,MRPL2,AKT2,TCEAL6,ADAMTS13
GO:BP	skin morphogenesis	GO:0043589	1	0	11	601	2	18123	COL1A1,ITGB4
GO:BP	skin development	GO:0043588	1	0	426	601	17	18123	COL1A1,KRT23,CLDN4,ITGB4,KRT19,KRT17,SOSTDC1,NME2,SOX9,KRT39,APCDD1,KRT16,KRT15,KRT8,JUP,NGFR,FRAS1
GO:BP	ear development	GO:0043583	1	0	221	601	10	18123	PDZD7,SOX9,EDN1,RPL38,IFT20,CDH23,TSHR,SLC9A3R1,LIN7A,MYO15A
GO:BP	regulation of respiratory gaseous exchange	GO:0043576	1	0	22	601	3	18123	SLC5A3,NLGN3,ATP1A2
GO:BP	peroxisomal transport	GO:0043574	1	0	32	601	1	18123	PEX6
GO:BP	negative regulation of insulin-like growth factor receptor signaling pathway	GO:0043569	1	0	9	601	1	18123	TRIM72
GO:BP	positive regulation of insulin-like growth factor receptor signaling pathway	GO:0043568	1	0	13	601	1	18123	IGFBP4
GO:BP	regulation of insulin-like growth factor receptor signaling pathway	GO:0043567	1	0	25	601	2	18123	IGFBP4,TRIM72
GO:BP	amide biosynthetic process	GO:0043604	1	0	975	601	30	18123	EIF1,MRPL38,CCL5,KRT17,MRPL27,UNK,AARSD1,CTIF,CASC3,RPL38,SLC1A2,RPL19,IGF2BP1,STAT3,MIF4GD,ASMT,PTAFR,MRPL55,EEFSEC,RPL27,NT5C3B,MRPS23,RPL23,PATL1,ERBB2,IGF2BP2,SPHK1,MRPL2,AKT2,TCEAL6
GO:BP	sulfur compound biosynthetic process	GO:0044272	1	0	195	601	5	18123	NCAN,SLC1A2,ACAN,BGN,PAPSS2
GO:BP	sulfur compound catabolic process	GO:0044273	1	0	54	601	3	18123	NCAN,ACAN,BGN
GO:BP	small molecule metabolic process	GO:0044281	1	0	1924	601	63	18123	NR1D1,CA7,SLC5A3,IGFBP4,P2RY6,NME2,SULT2B1,BRCA1,AARSD1,SLC4A4,DCXR,SOX9,ALDOC,TTR,EDN1,SARDH,SLC4A1,PSMD12,FDXR,PLCH1,AK7,APOL1,XDH,PTGDS,GDPD1,NMT1,LPO,KHK,GPX4,PLOD3,CD320,RPE65,STAT3,CYP1A1,UQCC3,PAPSS2,PTH1R,FN3K,PPARA,KPNB1,ACSM5,PTAFR,DKKL1,PSMB10,PSMB3,NT5C3B,ADCK4,ADCY1,SLC46A1,PLA2G4D,CYP7B1,DDC,PLA2G4F,CYP3A7,NME1,CYP2C9,DHRS7B,CYP17A1,SPHK1,AKT2,SCPEP1,STAT5B,PSMC5
GO:BP	positive regulation of innate immune response	GO:0045089	1	0	217	601	17	18123	ZBP1,CCL5,MUC17,LBP,MUC3A,SH2D1B,PSMD12,IFI35,HLA-F,TAB1,KLRC2,PSMB10,MUC20,PSMB3,STAT5B,PSMC5,IRF7
GO:BP	innate immune response	GO:0045087	1	0	1003	601	52	18123	CCL23,CCL19,ZBP1,CCL5,LGALS9,CCL14,HLA-DRA,MUC17,GRN,LBP,CLEC2A,MUC3A,EDN1,PIK3R6,SH2D1B,DHX58,PSMD12,RAB43,APOL1,SEC14L1,KRT16,IFI35,HLA-F,HLA-B,MCOLN2,TBKBP1,TAB1,KLRC2,ITGAM,LILRA5,PTAFR,PSMB10,IFI27,MUC20,PSMB3,STYK1,MST1R,HLA-A,DCST1,CASP8,HLA-DQB1,CCL3L1,STXBP3,TTLL12,STAT5B,ADAMTS13,HLA-DQA1,PSMC5,IRF7,SOCS3,ACTG1,STXBP4
GO:BP	negative regulation of viral genome replication	GO:0045071	1	0	55	601	1	18123	CCL5
GO:BP	positive regulation of viral genome replication	GO:0045070	1	0	30	601	2	18123	CCL5,PPARA
GO:BP	regulation of viral genome replication	GO:0045069	1	0	84	601	2	18123	CCL5,PPARA
GO:BP	regulatory T cell differentiation	GO:0045066	1	0	39	601	2	18123	LGALS9,HLA-DRA
GO:BP	T-helper 1 cell differentiation	GO:0045063	1	0	20	601	2	18123	CCL19,TMEM98
GO:BP	thymic T cell selection	GO:0045061	1	0	22	601	1	18123	CCR7
GO:BP	negative thymic T cell selection	GO:0045060	1	0	11	601	1	18123	CCR7
GO:BP	intermediate filament-based process	GO:0045103	1	0	51	601	3	18123	KRT17,NEFH,KRT16
GO:BP	T cell selection	GO:0045058	1	0	51	601	2	18123	STAT3,CCR7
GO:BP	regulated exocytosis	GO:0045055	1	0	790	601	39	18123	ITGA2B,FRMPD3,LGALS9,NME2,GRN,LGALS3BP,GHDC,VAT1,ALDOC,TTR,LYZ,DGKI,PLAC8,PSMD12,TIMP2,PRKCG,GGH,PTGDS,TMC6,HLA-F,HLA-B,KLRC2,ITGAM,KPNB1,UNC13A,PTAFR,MMP9,JUP,PIGR,ADCY1,PDAP1,F13A1,CXCL1,RAC2,ARF1,TRPM2,CACNA1G,STXBP3,SIGLEC5
GO:BP	protein retention in Golgi apparatus	GO:0045053	1	0	5	601	1	18123	VPS13A
GO:BP	protein insertion into ER membrane	GO:0045048	1	0	38	601	1	18123	CCDC47
GO:BP	protein targeting to ER	GO:0045047	1	0	111	601	5	18123	RPL38,RPL19,HSPA5,RPL27,RPL23
GO:BP	plasma membrane fusion	GO:0045026	1	0	26	601	2	18123	ADAM2,LYZL4
GO:BP	G0 to G1 transition	GO:0045023	1	0	48	601	2	18123	BRCA1,CDK3
GO:BP	early endosome to late endosome transport	GO:0045022	1	0	39	601	1	18123	BECN1
GO:BP	glycerolipid biosynthetic process	GO:0045017	1	0	299	601	10	18123	PLEKHA4,DGKI,PIK3R6,PGAP3,TPTE2,PITPNM3,PLA2G4D,PIP4K2B,ARF1,SOCS3
GO:BP	actin nucleation	GO:0045010	1	0	55	601	2	18123	VIL1,ARF1
GO:BP	transcytosis	GO:0045056	1	0	22	601	3	18123	LRPAP1,PTAFR,PIGR
GO:BP	DNA-dependent DNA replication maintenance of fidelity	GO:0045005	1	0	48	601	3	18123	DDX11,EME1,TONSL
GO:BP	intermediate filament cytoskeleton organization	GO:0045104	1	0	50	601	3	18123	KRT17,NEFH,KRT16
GO:BP	intermediate filament bundle assembly	GO:0045110	1	0	7	601	1	18123	NEFH
GO:BP	cellular respiration	GO:0045333	1	0	240	601	2	18123	COX4I2,UQCC3
GO:BP	phospholipid translocation	GO:0045332	1	0	47	601	3	18123	SLC4A1,ATP10A,ABCB4
GO:BP	late endosome to vacuole transport	GO:0045324	1	0	24	601	1	18123	BECN1
GO:BP	mRNA cis splicing, via spliceosome	GO:0045292	1	0	21	601	1	18123	SRSF1
GO:BP	cell-cell junction organization	GO:0045216	1	0	218	601	9	18123	CLDN4,RAMP2,TBCD,ABCC8,JUP,PKHD1,FBF1,SDK2,ACTG1
GO:BP	maintenance of epithelial cell apical/basal polarity	GO:0045199	1	0	11	601	2	18123	SLC9A3R1,LIN7A
GO:BP	establishment of epithelial cell apical/basal polarity	GO:0045198	1	0	17	601	2	18123	IFT20,SLC9A3R1
GO:BP	establishment or maintenance of epithelial cell apical/basal polarity	GO:0045197	1	0	43	601	3	18123	IFT20,SLC9A3R1,LIN7A
GO:BP	regulation of circadian sleep/wake cycle, sleep	GO:0045187	1	0	18	601	1	18123	PTGDS
GO:BP	intermediate filament organization	GO:0045109	1	0	24	601	2	18123	KRT17,NEFH
GO:BP	maintenance of protein location	GO:0045185	1	0	98	601	4	18123	NRROS,DAND5,HSPA5,VPS13A
GO:BP	cell fate commitment	GO:0045165	1	0	267	601	8	18123	SOSTDC1,NODAL,SOX9,MYT1L,STAT3,WNT3,IL7,SFRP2
GO:BP	meiotic sister chromatid segregation	GO:0045144	1	0	9	601	1	18123	RAD51C
GO:BP	homologous chromosome segregation	GO:0045143	1	0	62	601	1	18123	SYCE2
GO:BP	development of primary sexual characteristics	GO:0045137	1	0	231	601	6	18123	SOX9,HSPA5,INSL3,GAS2,SFRP2,STAT5B
GO:BP	development of secondary sexual characteristics	GO:0045136	1	0	9	601	1	18123	STAT5B
GO:BP	meiotic chromosome segregation	GO:0045132	1	0	92	601	4	18123	EME1,SLX4,SYCE2,RAD51C
GO:BP	regulation of bone resorption	GO:0045124	1	0	46	601	2	18123	TNFRSF11B,NF1
GO:BP	cellular extravasation	GO:0045123	1	0	69	601	2	18123	ADD2,PTAFR
GO:BP	azole transmembrane transport	GO:0045117	1	0	12	601	4	18123	SLC28A2,SLC38A7,SLC28A1,SLC38A5
GO:BP	establishment of protein localization	GO:0045184	1	0	1866	601	62	18123	COL1A1,MAPT,NR1D1,PDZD7,CCL5,COPZ2,KIF5C,SLC25A6,RPH3AL,RPH3A,NACAD,RAB34,JAKMIP1,RPL38,LLGL2,RPL19,CCDC47,RAB43,HSPA5,NMT1,RAMP2,MVB12A,TVP23A,EHD1,GOSR1,IFT20,RINL,STAT3,MCOLN2,GOSR2,ITGAM,KPNB1,NACA2,ABCC8,IFI27,JUP,VPS13A,TFR2,PAM16,RABEP2,RPL27,NGFR,KIF5A,LMAN2,FRAS1,RPL23,CASP8,LIN7A,ERBB2,RAC2,TBC1D3,USP36,ARF1,TRPM2,PEX6,RUNDC1,AKAP6,STXBP3,AKT2,RYR2,STXBP4,TBC1D3H
GO:BP	double-strand break repair via synthesis-dependent strand annealing	GO:0045003	1	0	7	601	1	18123	RAD51C
GO:BP	double-strand break repair via single-strand annealing	GO:0045002	1	0	7	601	1	18123	SLX4
GO:BP	plasma membrane raft organization	GO:0044857	1	0	10	601	1	18123	CAV3
GO:BP	long-chain fatty acid import into cell	GO:0044539	1	0	17	601	1	18123	AKT2
GO:BP	motile cilium assembly	GO:0044458	1	0	47	601	2	18123	TTLL1,CCDC40
GO:BP	biological process involved in interspecies interaction between organisms	GO:0044419	1	0	1768	601	80	18123	NR1D1,CCL23,CCL19,ZBP1,CCL5,LGALS9,CCL14,HLA-DRA,MUC17,GRN,VIL1,LBP,ULK2,SPAG11A,CXCL2,CLEC2A,LYZ,MUC3A,EDN1,DCLK1,GALP,PIK3R6,SH2D1B,PLAC8,DHX58,PSMD12,RAB43,APOL1,BPIFA2,SEC14L1,KRT16,LPO,IFI35,HLA-F,HLA-B,KRT8,CYP1A1,GNLY,MCOLN2,TBKBP1,TAB1,KLRC2,ITGAM,LILRA5,KPNB1,GRB2,PTAFR,PSMB10,ABCC8,IFI27,CXCL13,MUC20,PSMB3,STYK1,CXCL3,MST1R,HLA-A,DCST1,CASP8,HLA-DQB1,CXCL1,BECN1,CCL3L1,ARF1,STXBP3,CCR7,…
GO:BP	entry into host	GO:0044409	1	0	156	601	2	18123	LGALS9,GRB2
GO:BP	biological process involved in symbiotic interaction	GO:0044403	1	0	331	601	10	18123	CCL5,LGALS9,ULK2,SPAG11A,APOL1,KPNB1,GRB2,IFI27,CASP8,SMARCB1
GO:BP	protein localization to cytoskeleton	GO:0044380	1	0	58	601	1	18123	PPP1R9B
GO:BP	protein localization to actin cortical patch	GO:0044379	1	0	1	601	1	18123	PPP1R9B
GO:BP	negative regulation of molecular function in other organism	GO:0044362	1	0	7	601	1	18123	CASP8
GO:BP	modulation of molecular function in other organism	GO:0044359	1	0	9	601	1	18123	CASP8
GO:BP	relaxation of smooth muscle	GO:0044557	1	0	11	601	1	18123	ABCC8
GO:BP	cellular response to fibroblast growth factor stimulus	GO:0044344	1	0	148	601	6	18123	COL1A1,CCL5,POLR2E,GRB2,CXCL13,NGFR
GO:BP	sodium-dependent phosphate transport	GO:0044341	1	0	7	601	1	18123	SLC34A2
GO:BP	canonical Wnt signaling pathway involved in regulation of cell proliferation	GO:0044340	1	0	6	601	1	18123	WNT3
GO:BP	canonical Wnt signaling pathway involved in osteoblast differentiation	GO:0044339	1	0	5	601	1	18123	WNT3
GO:BP	canonical Wnt signaling pathway involved in mesenchymal stem cell differentiation	GO:0044338	1	0	3	601	1	18123	WNT3
GO:BP	cell-cell adhesion mediated by cadherin	GO:0044331	1	0	28	601	1	18123	RGCC
GO:BP	response to leptin	GO:0044321	1	0	24	601	3	18123	NR1D1,EDN1,STAT3
GO:BP	cellular response to leptin stimulus	GO:0044320	1	0	19	601	1	18123	STAT3
GO:BP	small molecule biosynthetic process	GO:0044283	1	0	675	601	22	18123	NR1D1,P2RY6,BRCA1,ALDOC,EDN1,FDXR,XDH,PTGDS,GPX4,PLOD3,CYP1A1,PTH1R,PPARA,KPNB1,ACSM5,PTAFR,DKKL1,ADCK4,CYP7B1,PLA2G4F,CYP2C9,SPHK1
GO:BP	small molecule catabolic process	GO:0044282	1	0	437	601	8	18123	DCXR,ALDOC,SARDH,XDH,KHK,CYP1A1,PPARA,AKT2
GO:BP	type B pancreatic cell proliferation	GO:0044342	1	0	23	601	2	18123	NR1D1,IGFBP4
GO:BP	uterine smooth muscle relaxation	GO:0044558	1	0	1	601	1	18123	ABCC8
GO:BP	tooth eruption	GO:0044691	1	0	7	601	1	18123	COL1A1
GO:BP	multi-organism reproductive process	GO:0044703	1	0	1060	601	49	18123	CLDN4,PPP1R9B,ITGB4,LGALS9,NODAL,ADAM2,MROH2B,PSG5,PSG4,SPAG11A,SOX9,GTSF1,RFX2,ZNF541,EDN1,TTLL1,SPATA20,THRA,RAMP2,INSL3,PRKAR1A,ADAM28,FAM50A,ZNF35,PSG7,GPX4,IFT20,STAT3,CYP1A1,WNT3,PRND,MOV10L1,PTAFR,LYZL4,MMP9,DKKL1,ABCC8,PSG9,MST1R,GAS2,RAD51C,SUN5,CORIN,ALKBH5,DUSP13,KCNU1,PPP1R1B,ELSPBP1,STAT5B
GO:BP	plasma membrane raft assembly	GO:0044854	1	0	7	601	1	18123	CAV3
GO:BP	estrous cycle	GO:0044849	1	0	18	601	1	18123	TRPM2
GO:BP	cell cycle G1/S phase transition	GO:0044843	1	0	287	601	7	18123	RPTOR,CYP1A1,CDK3,IQGAP3,CDK2AP2,RGCC,STXBP4
GO:BP	cell cycle G2/M phase transition	GO:0044839	1	0	273	601	8	18123	TAOK1,BRCA1,PSMD12,DBF4B,PSMB10,PSMB3,RAD51C,PSMC5
GO:BP	modulation by host of viral genome replication	GO:0044827	1	0	21	601	1	18123	IFI27
GO:BP	mitotic G1/S transition checkpoint signaling	GO:0044819	1	0	66	601	1	18123	RGCC
GO:BP	mitotic G2/M transition checkpoint	GO:0044818	1	0	34	601	2	18123	TAOK1,BRCA1
GO:BP	G-quadruplex DNA unwinding	GO:0044806	1	0	7	601	1	18123	DDX11
GO:BP	autophagy of nucleus	GO:0044804	1	0	15	601	1	18123	WIPI1
GO:BP	modulation by host of viral process	GO:0044788	1	0	33	601	1	18123	IFI27
GO:BP	cell cycle DNA replication	GO:0044786	1	0	70	601	3	18123	TEN1,DBF4B,RFC2
GO:BP	metaphase/anaphase transition of cell cycle	GO:0044784	1	0	64	601	1	18123	ANAPC11
GO:BP	cilium organization	GO:0044782	1	0	440	601	10	18123	RFX2,CROCC,TTLL1,EHD1,IFT20,CCDC40,RABEP2,PKHD1,FBF1,SLC9A3R1
GO:BP	mitotic DNA integrity checkpoint signaling	GO:0044774	1	0	107	601	3	18123	TAOK1,EME1,RGCC
GO:BP	mitotic DNA damage checkpoint signaling	GO:0044773	1	0	103	601	3	18123	TAOK1,EME1,RGCC
GO:BP	mitotic cell cycle phase transition	GO:0044772	1	0	588	601	18	18123	PPP1R9B,TAOK1,BRCA1,ANAPC11,PSMD12,DBF4B,RPTOR,CYP1A1,CCNJ,CDK3,PSMB10,PSMB3,RAD51C,IQGAP3,ANAPC2,CDK2AP2,PSMC5,RGCC
GO:BP	cell cycle phase transition	GO:0044770	1	0	681	601	20	18123	PPP1R9B,TAOK1,BRCA1,ANAPC11,PSMD12,DBF4B,RPTOR,CYP1A1,CCNJ,EME1,CDK3,PSMB10,PSMB3,RAD51C,IQGAP3,ANAPC2,CDK2AP2,PSMC5,RGCC,STXBP4
GO:BP	multi-organism transport	GO:0044766	1	0	66	601	2	18123	MVB12A,KPNB1
GO:BP	protein transmembrane import into intracellular organelle	GO:0044743	1	0	37	601	2	18123	PAM16,PEX6
GO:BP	DNA methylation or demethylation	GO:0044728	1	0	101	601	4	18123	BRCA1,CYP1A1,MOV10L1,MBD3
GO:BP	multi-multicellular organism process	GO:0044706	1	0	227	601	17	18123	CLDN4,ITGB4,LGALS9,NODAL,PSG5,PSG4,EDN1,RAMP2,PSG7,CYP1A1,PTAFR,MMP9,DKKL1,ABCC8,PSG9,CORIN,STAT5B
GO:BP	negative regulation of glucose import	GO:0046325	1	0	16	601	1	18123	STXBP3
GO:BP	white fat cell differentiation	GO:0050872	1	0	13	601	1	18123	ADIG
GO:BP	positive regulation of glucose import	GO:0046326	1	0	39	601	2	18123	SLC1A2,AKT2
GO:BP	negative regulation of JNK cascade	GO:0046329	1	0	39	601	1	18123	SFRP2
GO:BP	smooth muscle tissue development	GO:0048745	1	0	21	601	2	18123	SOX9,NF1
GO:BP	skeletal muscle fiber development	GO:0048741	1	0	35	601	1	18123	STAC3
GO:BP	cardiac muscle tissue development	GO:0048738	1	0	235	601	9	18123	EDN1,PRKAR1A,CAV3,IFT20,SIRT6,PPARA,CACNA1G,AKAP6,RYR2
GO:BP	appendage development	GO:0048736	1	0	175	601	5	18123	ITGB4,SOX9,WNT3,FRAS1,SFRP2
GO:BP	gland development	GO:0048732	1	0	443	601	20	18123	ELF3,SOSTDC1,NODAL,SRSF1,SOX9,RPL19,NF1,XDH,THRA,CAV3,CYP1A1,WNT3,CCDC40,IQGAP3,CYP7B1,SLC9A3R1,NME1,AKT2,PRKCSH,STAT5B
GO:BP	system development	GO:0048731	1	0	5095	601	202	18123	COL1A1,KRT23,MAPT,NR1D1,CHRND,CLDN4,PPP1R9B,PDZD7,MYO18B,SGCA,TNFRSF11B,ITGB4,SLC5A3,KRT19,COL8A1,CCL19,ITGA2B,KRT17,LGALS9,CHN1,HLA-DRA,ELF3,CPAMD8,MYRF,SOSTDC1,NODAL,NME2,NCAN,KIF5C,TAOK1,GRN,COPRS,CD79B,UNK,BRCA1,COL9A2,NRROS,ULK2,SRSF1,CRYBA4,TENC1,EPB42,LRTM1,ENPP2,CRYGA,DAND5,LAMC3,SOX9,GPC2,PLEKHA4,EDN1,RPL38,MYT1L,TLL2,ARHGDIA,NEFH,DCLK1,GREM2,SLC4A1,KIRREL3,SLC1A2,RPL19,PIK3R6,NF1,KRT39,…
GO:BP	epidermis morphogenesis	GO:0048730	1	0	32	601	4	18123	KRT17,SOSTDC1,PLOD3,NGFR
GO:BP	tissue morphogenesis	GO:0048729	1	0	675	601	33	18123	ITGB4,KRT17,SOSTDC1,NODAL,SOX9,PLEKHA4,EDN1,PSMD12,PRKAR1A,KRT16,CAV3,PLOD3,IFT20,SIRT6,WNT3,CCDC40,RIPK4,GRB2,PSMB10,PSMB3,NGFR,PKHD1,HOXB7,FRAS1,CYP7B1,SLC9A3R1,STARD13,SFRP2,RYR2,PSMC5,SOCS3,ACTG1,RSPO3
GO:BP	negative regulation of oligodendrocyte differentiation	GO:0048715	1	0	11	601	2	18123	NF1,TMEM98
GO:BP	branching morphogenesis of an epithelial tube	GO:0048754	1	0	154	601	7	18123	SOX9,EDN1,CAV3,SIRT6,PKHD1,HOXB7,SFRP2
GO:BP	regulation of oligodendrocyte differentiation	GO:0048713	1	0	39	601	2	18123	NF1,TMEM98
GO:BP	regulation of astrocyte differentiation	GO:0048710	1	0	31	601	1	18123	NR1D1
GO:BP	oligodendrocyte differentiation	GO:0048709	1	0	103	601	6	18123	MYRF,SRSF1,SOX9,NF1,TMEM98,ERBB2
GO:BP	astrocyte differentiation	GO:0048708	1	0	83	601	7	18123	MAPT,NR1D1,GRN,LAMC3,SOX9,NF1,STAT3
GO:BP	embryonic skeletal system development	GO:0048706	1	0	123	601	4	18123	COL1A1,NODAL,MBTD1,HOXB7
GO:BP	skeletal system morphogenesis	GO:0048705	1	0	226	601	8	18123	COL1A1,NODAL,SOX9,ACAN,THRA,COL13A1,HOXB7,SFRP2
GO:BP	embryonic skeletal system morphogenesis	GO:0048704	1	0	95	601	2	18123	NODAL,HOXB7
GO:BP	embryonic cranial skeleton morphogenesis	GO:0048701	1	0	45	601	1	18123	NODAL
GO:BP	generation of neurons	GO:0048699	1	0	1576	601	58	18123	MAPT,NR1D1,PPP1R9B,PDZD7,CHN1,NME2,KIF5C,TAOK1,GRN,UNK,ULK2,LRTM1,SOX9,GPC2,MYT1L,ARHGDIA,NEFH,DCLK1,KIRREL3,NF1,TIMP2,FAT3,HSPA5,TTLL1,RASGRF1,SEMA6C,IGF2BP1,EHD1,IFT20,STAT3,WNT3,TBCD,RNF157,GRB2,UNC13A,NLGN3,TMEM98,ABCC8,CDH23,NGFR,KIF5A,TSHR,ADCY1,SDK2,SLC9A3R1,ERBB2,BECN1,RAC2,SH3GL3,NME1,ARF1,SFRP2,ANAPC2,DPYSL5,HDAC5,PTPRD,PRKCSH,PREX1
GO:BP	positive regulation of collateral sprouting in absence of injury	GO:0048697	1	0	2	601	1	18123	WNT3
GO:BP	negative regulation of astrocyte differentiation	GO:0048712	1	0	15	601	1	18123	NR1D1
GO:BP	regulation of collateral sprouting in absence of injury	GO:0048696	1	0	3	601	1	18123	WNT3
GO:BP	mesenchymal cell differentiation	GO:0048762	1	0	239	601	6	18123	COL1A1,SOX9,EDN1,SEMA6C,SFRP2,RGCC
GO:BP	calcium ion-regulated exocytosis of neurotransmitter	GO:0048791	1	0	17	601	1	18123	UNC13A
GO:BP	cellular developmental process	GO:0048869	1	0	4468	601	167	18123	COL1A1,KRT23,MAPT,NR1D1,PPP1R9B,PDZD7,MYO18B,ITGB4,KRT19,COL8A1,CCL19,ITGA2B,KRT17,LGALS9,CHN1,HLA-DRA,ELF3,MYRF,SOSTDC1,NODAL,NME2,KIF5C,TAOK1,GRN,MROH2B,SULT2B1,CD79B,VIL1,UNK,NRROS,ULK2,SLFN5,SRSF1,EPB42,LRTM1,ENPP2,LAMC3,SOX9,GPC2,GTSF1,RFX2,ALDOC,ZNF541,FER1L5,EDN1,MYT1L,TLL2,ARHGDIA,NEFH,DCLK1,SLC4A1,KIRREL3,PIK3R6,NF1,PLAC8,KRT39,CCDC47,PSMD12,ACAN,TIMP2,FAT3,H3F3B,HSPA5,XDH,TTLL1,RASGRF1,…
GO:BP	stem cell fate specification	GO:0048866	1	0	4	601	1	18123	SOX9
GO:BP	stem cell fate commitment	GO:0048865	1	0	6	601	1	18123	SOX9
GO:BP	stem cell development	GO:0048864	1	0	86	601	4	18123	SOX9,EDN1,SEMA6C,MSI2
GO:BP	stem cell differentiation	GO:0048863	1	0	261	601	10	18123	SOX9,EDN1,PSMD12,SEMA6C,STAT3,WNT3,PSMB10,MSI2,PSMB3,PSMC5
GO:BP	formation of anatomical boundary	GO:0048859	1	0	4	601	1	18123	NODAL
GO:BP	cell projection morphogenesis	GO:0048858	1	0	688	601	27	18123	MAPT,CHN1,KIF5C,TAOK1,VIL1,ULK2,LRTM1,ENPP2,ARHGDIA,NEFH,DCLK1,KIRREL3,SEMA6C,IGF2BP1,WNT3,RNF157,GRB2,UNC13A,NLGN3,NGFR,KIF5A,ADCY1,ERBB2,RAC2,ANAPC2,DPYSL5,PTPRD
GO:BP	neural nucleus development	GO:0048857	1	0	66	601	2	18123	KIRREL3,HSPA5
GO:BP	anatomical structure development	GO:0048856	1	0	6164	601	240	18123	COL1A1,KRT23,MAPT,NR1D1,CHRND,CLDN4,PPP1R9B,PDZD7,MYO18B,SGCA,TNFRSF11B,ITGB4,SLC5A3,KRT19,COL8A1,CCL19,ITGA2B,KRT17,LGALS9,CHN1,NSRP1,HLA-DRA,ELF3,CPAMD8,MYRF,SOSTDC1,NODAL,NME2,NCAN,KIF5C,TAOK1,GRN,COPRS,SULT2B1,CD79B,VIL1,UNK,BRCA1,COL9A2,NRROS,ULK2,RNF43,SRSF1,CRYBA4,TENC1,EPB42,LRTM1,ENPP2,CRYGA,DAND5,LAMC3,SOX9,GPC2,FGD2,RFX2,VAT1,ALDOC,PLEKHA4,ZNF541,FER1L5,EDN1,RPL38,MYT1L,TLL2,ARHGDIA,NE…
GO:BP	tissue remodeling	GO:0048771	1	0	187	601	8	18123	TNFRSF11B,ELF3,NF1,BGN,PTH1R,IL7,RAC2,RSPO3
GO:BP	brain morphogenesis	GO:0048854	1	0	39	601	1	18123	NF1
GO:BP	axon extension involved in axon guidance	GO:0048846	1	0	37	601	2	18123	SEMA6C,WNT3
GO:BP	artery morphogenesis	GO:0048844	1	0	77	601	1	18123	NF1
GO:BP	negative regulation of axon extension involved in axon guidance	GO:0048843	1	0	26	601	2	18123	SEMA6C,WNT3
GO:BP	regulation of axon extension involved in axon guidance	GO:0048841	1	0	32	601	2	18123	SEMA6C,WNT3
GO:BP	inner ear development	GO:0048839	1	0	196	601	8	18123	PDZD7,SOX9,IFT20,CDH23,TSHR,SLC9A3R1,LIN7A,MYO15A
GO:BP	erythrocyte development	GO:0048821	1	0	34	601	2	18123	EPB42,SLC4A1
GO:BP	regulation of dendrite morphogenesis	GO:0048814	1	0	68	601	2	18123	ANAPC2,PTPRD
GO:BP	dendrite morphogenesis	GO:0048813	1	0	149	601	4	18123	DCLK1,IGF2BP1,ANAPC2,PTPRD
GO:BP	neuron projection morphogenesis	GO:0048812	1	0	670	601	25	18123	MAPT,CHN1,KIF5C,TAOK1,ULK2,LRTM1,ARHGDIA,NEFH,DCLK1,KIRREL3,SEMA6C,IGF2BP1,WNT3,RNF157,GRB2,UNC13A,NLGN3,NGFR,KIF5A,ADCY1,ERBB2,RAC2,ANAPC2,DPYSL5,PTPRD
GO:BP	forebrain morphogenesis	GO:0048853	1	0	12	601	1	18123	NF1
GO:BP	cell motility	GO:0048870	1	0	1840	601	81	18123	COL1A1,CLDN4,PPP1R9B,CCL23,ITGB4,CCL19,ITGA2B,CCL5,LGALS9,CCL14,CCL15-CCL14,P2RY6,NODAL,CCL27,GRN,VIL1,UNK,LBP,CXCL2,ENPP2,LAMC3,SOX9,GPC2,TAC4,CCR8,EDN1,ARHGDIA,DCLK1,KIRREL3,NF1,FAT3,HSPA5,MAP2K3,ADD2,TTLL1,INSL3,SEMA6C,KRT16,FRMD5,TMEM201,STAT3,MCOLN2,CCDC40,ITGAM,TPTE2,CARD10,GRB2,PTAFR,MMP9,ABCC8,JUP,VPS13A,CXCL13,CXCL3,MST1R,MMP28,ARHGAP18,TWIST2,CYP7B1,SLC9A3R1,SLC7A6,CXCL1,ERBB2,RAC2,CCL3…
GO:BP	positive regulation of axon regeneration	GO:0048680	1	0	12	601	1	18123	GRN
GO:BP	response to axon injury	GO:0048678	1	0	81	601	1	18123	GRN
GO:BP	embryonic morphogenesis	GO:0048598	1	0	601	601	22	18123	PDZD7,ITGB4,COL8A1,NODAL,SOX9,EDN1,RPL38,GREM2,PRKAR1A,WNT3,CCDC40,GRB2,MMP9,TSHR,HOXB7,FRAS1,SLC9A3R1,SFRP2,MYO15A,RYR2,SOCS3,RSPO3
GO:BP	camera-type eye morphogenesis	GO:0048593	1	0	126	601	6	18123	COL8A1,SOX9,NF1,FAT3,RPE65,SDK2
GO:BP	eye morphogenesis	GO:0048592	1	0	156	601	7	18123	COL8A1,SOX9,NF1,FAT3,RPE65,STAT3,SDK2
GO:BP	developmental growth	GO:0048589	1	0	654	601	32	18123	MAPT,CHRND,SGCA,SP2,VIL1,ULK2,TENC1,SOX9,EDN1,TLL2,DCLK1,SLC1A2,PLAC8,GPR21,PRKAR1A,SEMA6C,CAV3,SIRT6,STAT3,WNT3,PPARA,RNF157,UNC13A,NLGN3,IL7,LARGE,GAS2,TSHR,SFRP2,AKAP6,ANAPC2,STAT5B
GO:BP	developmental cell growth	GO:0048588	1	0	236	601	15	18123	MAPT,ULK2,SOX9,EDN1,DCLK1,SEMA6C,CAV3,SIRT6,WNT3,PPARA,RNF157,UNC13A,NLGN3,AKAP6,ANAPC2
GO:BP	negative regulation of response to stimulus	GO:0048585	1	0	1938	601	82	18123	NR1D1,LRPAP1,IGFBP4,DUSP14,CCL5,LGALS9,RASAL3,SOSTDC1,NODAL,GRK4,GRN,KPTN,BRCA1,NRROS,RNF43,TENC1,DAND5,SOX9,EDN1,GREM2,NF1,DHX58,PSMD12,TIMP2,HSPA5,XDH,MAP2K3,SEC14L1,CYSLTR2,GPR21,APCDD1,RAMP2,INSL3,PRKAR1A,SEMA6C,WNK2,RGS9,IFI35,CAV3,HLA-F,WIF1,HLA-B,WNT3,PTH1R,PPARA,RNF157,GRB2,MMP9,DKKL1,PSMB10,ABCC8,CXCL13,PSMB3,PAM16,TSHB,NGFR,IL7,HLA-A,PKHD1,MMP28,TSHR,DCST1,ADCY1,CASP8,CYP7B1,GPS1,SLC9A3…
GO:BP	positive regulation of response to stimulus	GO:0048584	1	0	2368	601	95	18123	COL1A1,CLDN4,CCL23,CCL19,ZBP1,IGFBP4,CCL5,LGALS9,CCL14,P2RY6,HLA-DRA,ELF3,MUC17,NODAL,CCL27,NOS1AP,RSPO1,TAOK1,GRN,LRRC59,CD79B,BRCA1,LBP,SOX9,FGD2,PLEKHA4,RAB34,MUC3A,EDN1,DGKI,PIK3R6,SH2D1B,DHX58,PSMD12,TIMP2,XDH,MAP2K3,PRKCG,RASGRF1,INSL3,RPTOR,DDX11,WNK2,IFI35,CD19,HLA-F,STAT3,HLA-B,WNT3,TAB1,KLRC2,SYNPO2L,ITGAM,LILRA5,GRB2,ICOS,PTAFR,MMP9,P2RY8,NLGN3,PSMB10,C17ORF99,JUP,CXCL13,MUC20,PSMB3,MS…
GO:BP	embryonic organ development	GO:0048568	1	0	436	601	20	18123	PDZD7,KRT19,NODAL,SOX9,EDN1,RPL38,BPTF,KRT8,CCDC40,GRB2,COL13A1,TSHR,HOXB7,CASP8,SLC9A3R1,MBD3,MYO15A,RYR2,SOCS3,RSPO3
GO:BP	digestive tract development	GO:0048565	1	0	129	601	4	18123	NODAL,CYP1A1,CCDC40,SFRP2
GO:BP	oocyte development	GO:0048599	1	0	47	601	1	18123	INSL3
GO:BP	embryonic organ morphogenesis	GO:0048562	1	0	295	601	11	18123	PDZD7,NODAL,SOX9,EDN1,RPL38,CCDC40,TSHR,HOXB7,SLC9A3R1,MYO15A,RYR2
GO:BP	response to steroid hormone	GO:0048545	1	0	385	601	16	18123	COL1A1,NR1D1,CLDN4,PPP1R9B,NODAL,BRCA1,EDN1,H3F3B,RAMP2,ATP2B1,PPARA,PTAFR,RPL27,ATP1A2,CYP7B1,ESRRG
GO:BP	Peyer's patch development	GO:0048541	1	0	8	601	1	18123	STAT5B
GO:BP	mucosa-associated lymphoid tissue development	GO:0048537	1	0	8	601	1	18123	STAT5B
GO:BP	spleen development	GO:0048536	1	0	33	601	1	18123	EPB42
GO:BP	hematopoietic or lymphoid organ development	GO:0048534	1	0	984	601	41	18123	CCL19,ITGA2B,LGALS9,HLA-DRA,NME2,CD79B,NRROS,EPB42,SLC4A1,KIRREL3,PIK3R6,PSMD12,H3F3B,ADD2,THRA,CD19,STAT3,HLA-B,MMP9,PSMB10,C17ORF99,TMEM98,PSMB3,IL7,TSHR,HOXB7,CASP8,HLA-DQB1,ERBB2,NME1,KAT7,ARMC6,TRPM2,SFRP2,CCR7,HDAC5,STAT5B,PSMC5,IRF7,MS4A1,PREX1
GO:BP	anatomical structure arrangement	GO:0048532	1	0	18	601	1	18123	HSPA5
GO:BP	negative regulation of viral process	GO:0048525	1	0	96	601	1	18123	CCL5
GO:BP	positive regulation of viral process	GO:0048524	1	0	90	601	5	18123	CCL5,LGALS9,POLR2E,SUPT4H1,PPARA
GO:BP	negative regulation of cellular process	GO:0048523	1	0	5153	601	192	18123	COL1A1,MAPT,NR1D1,ADAMDEC1,PPP1R9B,CCL23,SLN,DLEC1,CCL19,LRPAP1,IGFBP4,DUSP14,CCL5,LGALS9,SP2,P2RY6,RASAL3,ELF3,CPAMD8,SOSTDC1,NODAL,NME2,TAOK1,GRK4,GRN,KPTN,CNN1,TMC8,TEN1,SULT2B1,VIL1,GRID2IP,UNK,BRCA1,NRROS,RNF43,ZNF529,TENC1,DAND5,SOX9,POLR2E,VAT1,ZNF541,FER1L5,EDN1,MYT1L,ARHGDIA,DCLK1,GREM2,DGKI,SLC4A1,TSKS,UHRF1,NF1,SPON1,PLAC8,TRIM37,DHX58,PSMD12,BPTF,TIMP2,FAT3,H3F3B,HSPA5,XDH,MAP2K3,PRKC…
GO:BP	digestive tract morphogenesis	GO:0048546	1	0	45	601	2	18123	NODAL,SFRP2
GO:BP	regulation of axon regeneration	GO:0048679	1	0	30	601	1	18123	GRN
GO:BP	reproductive structure development	GO:0048608	1	0	433	601	15	18123	KRT19,NODAL,SOX9,BPTF,HSPA5,INSL3,KRT8,GRB2,GAS2,CASP8,CYP7B1,SFRP2,STAT5B,SOCS3,RSPO3
GO:BP	skeletal muscle tissue growth	GO:0048630	1	0	8	601	2	18123	CHRND,TLL2
GO:BP	axon extension	GO:0048675	1	0	123	601	7	18123	MAPT,ULK2,DCLK1,SEMA6C,WNT3,NLGN3,ANAPC2
GO:BP	positive regulation of collateral sprouting	GO:0048672	1	0	11	601	1	18123	WNT3
GO:BP	regulation of collateral sprouting	GO:0048670	1	0	19	601	1	18123	WNT3
GO:BP	collateral sprouting in absence of injury	GO:0048669	1	0	5	601	1	18123	WNT3
GO:BP	collateral sprouting	GO:0048668	1	0	25	601	1	18123	WNT3
GO:BP	cell morphogenesis involved in neuron differentiation	GO:0048667	1	0	607	601	25	18123	MAPT,PDZD7,CHN1,KIF5C,UNK,ULK2,LRTM1,ARHGDIA,NEFH,DCLK1,SEMA6C,IGF2BP1,WNT3,TBCD,GRB2,NLGN3,NGFR,KIF5A,ADCY1,SLC9A3R1,ERBB2,RAC2,ANAPC2,DPYSL5,PTPRD
GO:BP	neuron development	GO:0048666	1	0	1159	601	47	18123	MAPT,PPP1R9B,PDZD7,CHN1,NME2,KIF5C,TAOK1,GRN,UNK,ULK2,LRTM1,GPC2,MYT1L,ARHGDIA,NEFH,DCLK1,KIRREL3,FAT3,HSPA5,RASGRF1,SEMA6C,IGF2BP1,EHD1,IFT20,WNT3,TBCD,RNF157,GRB2,UNC13A,NLGN3,CDH23,NGFR,KIF5A,TSHR,ADCY1,SLC9A3R1,ERBB2,BECN1,RAC2,NME1,ARF1,SFRP2,ANAPC2,DPYSL5,PTPRD,PRKCSH,PREX1
GO:BP	neuron fate specification	GO:0048665	1	0	29	601	1	18123	MYT1L
GO:BP	neuron fate commitment	GO:0048663	1	0	63	601	1	18123	MYT1L
GO:BP	multicellular organismal reproductive process	GO:0048609	1	0	858	601	36	18123	PPP1R9B,LGALS9,NODAL,MROH2B,SPAG11A,SOX9,GTSF1,RFX2,ZNF541,EDN1,HSPA5,TTLL1,SPATA20,THRA,INSL3,PRKAR1A,ADAM28,FAM50A,ZNF35,GPX4,IFT20,CYP1A1,WNT3,MOV10L1,PTAFR,DKKL1,GAS2,RAD51C,SUN5,ALKBH5,DUSP13,NPAS1,TRPM2,PPP1R1B,ELSPBP1,STAT5B
GO:BP	negative regulation of smooth muscle cell proliferation	GO:0048662	1	0	74	601	1	18123	CNN1
GO:BP	regulation of smooth muscle cell proliferation	GO:0048660	1	0	178	601	6	18123	CCL5,P2RY6,CNN1,EDN1,PTAFR,MMP9
GO:BP	smooth muscle cell proliferation	GO:0048659	1	0	181	601	6	18123	CCL5,P2RY6,CNN1,EDN1,PTAFR,MMP9
GO:BP	anatomical structure formation involved in morphogenesis	GO:0048646	1	0	1209	601	48	18123	COL1A1,ITGB4,KRT19,COL8A1,NODAL,GRN,BRCA1,ENPP2,SOX9,RFX2,FER1L5,EDN1,PIK3R6,NF1,FAT3,TTLL1,RAMP2,PRKAR1A,EHD1,CAV3,SIRT6,STAT3,KRT8,WNT3,SYNPO2L,PPARA,CARD10,GRB2,MMP9,COL18A1,ABCC8,JUP,CXCL13,TMOD4,NGFR,CASP8,SDK2,ERBB2,STARD13,SFRP2,SPHK1,HDAC5,ANGPT4,FLII,PLXDC1,RGCC,ACTG1,RSPO3
GO:BP	muscle organ morphogenesis	GO:0048644	1	0	77	601	2	18123	SIRT6,RYR2
GO:BP	negative regulation of developmental growth	GO:0048640	1	0	112	601	6	18123	TLL2,PLAC8,SEMA6C,CAV3,WNT3,PPARA
GO:BP	positive regulation of developmental growth	GO:0048639	1	0	182	601	12	18123	MAPT,VIL1,EDN1,GPR21,WNT3,RNF157,UNC13A,IL7,TSHR,AKAP6,ANAPC2,STAT5B
GO:BP	regulation of developmental growth	GO:0048638	1	0	338	601	18	18123	MAPT,VIL1,EDN1,TLL2,PLAC8,GPR21,SEMA6C,CAV3,STAT3,WNT3,PPARA,RNF157,UNC13A,IL7,TSHR,AKAP6,ANAPC2,STAT5B
GO:BP	negative regulation of skeletal muscle tissue growth	GO:0048632	1	0	2	601	1	18123	TLL2
GO:BP	regulation of skeletal muscle tissue growth	GO:0048631	1	0	6	601	1	18123	TLL2
GO:BP	positive regulation of smooth muscle cell proliferation	GO:0048661	1	0	103	601	5	18123	CCL5,P2RY6,EDN1,PTAFR,MMP9
GO:BP	positive regulation of cellular process	GO:0048522	1	0	5863	601	201	18123	COL1A1,MAPT,NR1D1,CLDN4,UBTF,PPP1R9B,ZNF341,CCL23,SLN,CA7,SLC5A3,COL8A1,CCL19,ZBP1,ITGA2B,IGFBP4,CCL5,KRT17,LGALS9,CCL14,P2RY6,RASAL3,HLA-DRA,ELF3,MYRF,NODAL,CCL27,NME2,NOS1AP,RSPO1,TAOK1,GRN,LRRC59,SULT2B1,VIL1,RPH3AL,BRCA1,LBP,SRSF1,SAP30BP,SLC4A4,ENPP2,DCXR,SOX9,GPC2,FGD2,TAC4,CTIF,CROCC,PLEKHA4,RAB34,EDN1,ANAPC11,ARHGDIA,HBA2,DGKI,SLC1A2,UHRF1,PIK3R6,NF1,SPON1,PLAC8,TRIM37,DHX58,PSMD12,BPTF,T…
GO:BP	multicellular organismal homeostasis	GO:0048871	1	0	533	601	28	18123	NR1D1,CLDN4,SLN,TNFRSF11B,TENC1,SOX9,CROCC,LYZ,NF1,PLAC8,SLC28A2,THRA,PRKAR1A,KRT16,SIRT6,RPE65,STAT3,PTH1R,ABCC8,CDH23,IL7,PIGR,TSHR,ADCY1,RAC2,TRPM2,ESRRG,ACTG1
GO:BP	homeostasis of number of cells within a tissue	GO:0048873	1	0	28	601	2	18123	SOX9,IL7
GO:BP	regulation of steroid biosynthetic process	GO:0050810	1	0	73	601	3	18123	NR1D1,KPNB1,DKKL1
GO:BP	synapse organization	GO:0050808	1	0	432	601	15	18123	MAPT,NOS1AP,NEFH,KIRREL3,ADD2,ITGAM,UNC13A,NLGN3,SDK2,ERBB2,ARF1,ANAPC2,PTPRD,ARHGAP39,ACTG1
GO:BP	regulation of synapse organization	GO:0050807	1	0	212	601	3	18123	NLGN3,ANAPC2,PTPRD
GO:BP	positive regulation of synaptic transmission	GO:0050806	1	0	155	601	4	18123	CA7,PRKCG,NLGN3,ADCY1
GO:BP	negative regulation of synaptic transmission	GO:0050805	1	0	71	601	4	18123	MAPT,GRID2IP,DGKI,ARF1
GO:BP	modulation of chemical synaptic transmission	GO:0050804	1	0	434	601	17	18123	MAPT,PPP1R9B,CA7,GRID2IP,EDN1,DGKI,PRKCG,RASGRF1,STAT3,UNC13A,NLGN3,ADCY1,ATP1A2,ARF1,ANAPC2,PTPRD,PSMC5
GO:BP	regulation of synapse structure or activity	GO:0050803	1	0	223	601	3	18123	NLGN3,ANAPC2,PTPRD
GO:BP	circadian sleep/wake cycle, sleep	GO:0050802	1	0	21	601	1	18123	PTGDS
GO:BP	activated T cell proliferation	GO:0050798	1	0	49	601	3	18123	LGALS9,PRKAR1A,STAT5B
GO:BP	coagulation	GO:0050817	1	0	358	601	18	18123	COL1A1,ITGA2B,EDN1,DGKI,SLC4A1,PIK3R6,H3F3B,PRKCG,PRKAR1A,AKAP10,EHD1,RAD51C,F13A1,PEAR1,STXBP3,TSPAN32,ADAMTS13,ACTG1
GO:BP	regulation of insulin secretion	GO:0050796	1	0	187	601	5	18123	NR1D1,CCL5,ABCC8,TRPM2,STXBP4
GO:BP	regulation of cellular process	GO:0050794	1	0	11517	601	388	18123	COL1A1,MAPT,NR1D1,CHRND,EIF1,LGI3,CLDN4,UBTF,ADAMDEC1,PPP1R9B,GRAP,ZACN,ZNF341,CCL23,SLN,TNFRSF11B,ITGB4,CA7,SLC5A3,KRT19,COL8A1,DLEC1,CCL19,LRPAP1,ZBP1,ITGA2B,IGFBP4,DUSP14,CCL5,KRT17,LGALS9,P2RY13,CHN1,CHRNG,RASGEF1C,ERAP2,NSRP1,SP2,CCL14,CCL15-CCL14,P2RY6,RASAL3,HLA-DRA,ELF3,MUC17,CPAMD8,MYRF,SOSTDC1,NODAL,CGN,CCL27,NME2,NOS1AP,ADRBK2,RSPO1,TAOK1,GRK4,GRN,ADAM2,SCN4A,MROH2B,LRRC59,KPTN,CNN1,TM…
GO:BP	regulation of developmental process	GO:0050793	1	0	2621	601	98	18123	COL1A1,MAPT,NR1D1,CLDN4,TNFRSF11B,CCL19,ITGA2B,KRT17,LGALS9,CHN1,HLA-DRA,MYRF,SOSTDC1,NODAL,NME2,GRN,SULT2B1,VIL1,BRCA1,EPB42,ENPP2,DAND5,SOX9,FGD2,VAT1,PLEKHA4,EDN1,TLL2,ARHGDIA,PIK3R6,NF1,PLAC8,PSMD12,TIMP2,FAT3,H3F3B,XDH,TTLL1,GPR21,RAMP2,SEMA6C,ATP10A,EHD1,CAV3,ASB4,SIRT6,STAT3,WIF1,HLA-B,ATP2B1,WNT3,PPARA,RNF157,UNC13A,MMP9,NLGN3,DKKL1,PSMB10,TMEM98,ABCC8,JUP,CXCL13,ADIG,PSMB3,NGFR,IL7,PKHD1…
GO:BP	regulation of viral process	GO:0050792	1	0	193	601	5	18123	CCL5,LGALS9,POLR2E,SUPT4H1,PPARA
GO:BP	regulation of catalytic activity	GO:0050790	1	0	2452	601	102	18123	MAPT,CLDN4,PPP1R9B,CCL23,SLN,SLC5A3,CCL19,DUSP14,CCL5,LGALS9,P2RY13,CHN1,RASGEF1C,CCL14,P2RY6,RASAL3,CPAMD8,NODAL,NOS1AP,TAOK1,GRN,TEN1,VIL1,FGD2,CHN2,EDN1,ARHGDIA,LLGL2,DGKI,SLC4A1,TSKS,UHRF1,PIK3R6,NF1,TIMP2,XDH,MAP2K3,RASGRF1,DBF4B,PRKAR1A,RPTOR,DDX11,RGS9,CAV3,NPFFR2,CD19,RINL,STAT3,UBE2Z,CCNJ,TRPT1,TAB1,CYTH3,ITGAM,LILRA5,TBCD,CARD10,PTAFR,MMP9,TNFSF15,RFC2,CXCL13,MUC20,MST1R,RABEP2,NGFR,IL7…
GO:BP	regulation of biological process	GO:0050789	1	0	12122	601	401	18123	COL1A1,MAPT,NR1D1,CHRND,EIF1,LGI3,CLDN4,UBTF,ADAMDEC1,PPP1R9B,GRAP,ZACN,SGCA,ZNF341,CCL23,SLN,TNFRSF11B,ITGB4,CA7,SLC5A3,KRT19,COL8A1,DLEC1,CCL19,LRPAP1,ZBP1,ITGA2B,IGFBP4,DUSP14,CCL5,KRT17,LGALS9,P2RY13,CHN1,CHRNG,RASGEF1C,ERAP2,NSRP1,SP2,CCL14,CCL15-CCL14,P2RY6,RASAL3,HLA-DRA,ELF3,MUC17,CPAMD8,MYRF,SOSTDC1,NODAL,CGN,CCL27,NME2,NOS1AP,ADRBK2,RSPO1,TAOK1,GRK4,GRN,ADAM2,SCN4A,MROH2B,LRRC59,KPTN,CN…
GO:BP	RNA destabilization	GO:0050779	1	0	111	601	2	18123	NT5C3B,PATL1
GO:BP	positive regulation of immune response	GO:0050778	1	0	757	601	35	18123	CCL19,ZBP1,CCL5,LGALS9,HLA-DRA,MUC17,GRN,CD79B,LBP,MUC3A,SH2D1B,PSMD12,IFI35,CD19,HLA-F,HLA-B,TAB1,KLRC2,ITGAM,GRB2,PTAFR,PSMB10,C17ORF99,MUC20,PSMB3,HLA-A,HLA-DQB1,CCR7,STAT5B,HLA-DQA1,PSMC5,IRF7,MS4A1,RGCC,ACTG1
GO:BP	negative regulation of immune response	GO:0050777	1	0	373	601	17	18123	LGALS9,GRN,DHX58,SEC14L1,CYSLTR2,RAMP2,INSL3,PRKAR1A,HLA-F,HLA-B,PTH1R,TSHB,HLA-A,TSHR,DCST1,ADCY1,TTLL12
GO:BP	regulation of immune response	GO:0050776	1	0	1159	601	56	18123	COL1A1,CCL19,ZBP1,CCL5,LGALS9,HLA-DRA,MUC17,GRN,CD79B,LBP,MUC3A,PIK3R6,SH2D1B,DHX58,PSMD12,SEC14L1,CYSLTR2,RAMP2,INSL3,PRKAR1A,IFI35,CD19,HLA-F,HLA-B,PTH1R,TAB1,KLRC2,ITGAM,GRB2,PTAFR,PSMB10,C17ORF99,CXCL13,MUC20,PSMB3,TSHB,PIGR,HLA-A,TSHR,DCST1,ADCY1,CASP8,HLA-DQB1,RAC2,CCR7,TTLL12,PTPRD,TSPAN32,STAT5B,HLA-DQA1,PSMC5,IRF7,SOCS3,MS4A1,RGCC,ACTG1
GO:BP	regulation of behavior	GO:0050795	1	0	71	601	3	18123	NR1D1,PTGDS,STAT3
GO:BP	positive regulation of dendrite morphogenesis	GO:0050775	1	0	37	601	2	18123	ANAPC2,PTPRD
GO:BP	regulation of coagulation	GO:0050818	1	0	77	601	1	18123	EDN1
GO:BP	protein stabilization	GO:0050821	1	0	195	601	5	18123	GRN,RPL23,USP36,PEX6,STXBP4
GO:BP	positive regulation of T cell activation	GO:0050870	1	0	221	601	14	18123	CCL19,CCL5,LGALS9,RASAL3,HLA-DRA,PIK3R6,GRB2,ICOS,IL7,HLA-A,HLA-DQB1,CCR7,DOCK8,STAT5B
GO:BP	negative regulation of T cell activation	GO:0050868	1	0	125	601	4	18123	LGALS9,PRKAR1A,TIGIT,ERBB2
GO:BP	positive regulation of cell activation	GO:0050867	1	0	426	601	21	18123	CCL19,CCL5,LGALS9,RASAL3,HLA-DRA,LBP,PIK3R6,HLA-F,CD320,KLRC2,ITGAM,LILRA5,GRB2,ICOS,PTAFR,IL7,HLA-A,HLA-DQB1,CCR7,DOCK8,STAT5B
GO:BP	negative regulation of cell activation	GO:0050866	1	0	216	601	8	18123	NR1D1,LGALS9,GRN,PRKAR1A,HLA-F,TIGIT,ERBB2,TSPAN32
GO:BP	regulation of cell activation	GO:0050865	1	0	662	601	30	18123	NR1D1,CCL19,CCL5,LGALS9,RASAL3,HLA-DRA,GRN,LBP,PIK3R6,PRKAR1A,CD19,HLA-F,CD320,KLRC2,ITGAM,LILRA5,GRB2,ICOS,TIGIT,PTAFR,IL7,HLA-A,HLA-DQB1,ERBB2,RAC2,SPHK1,CCR7,DOCK8,TSPAN32,STAT5B
GO:BP	regulation of B cell activation	GO:0050864	1	0	197	601	4	18123	CD19,CD320,IL7,STAT5B
GO:BP	regulation of T cell activation	GO:0050863	1	0	341	601	18	18123	CCL19,CCL5,LGALS9,RASAL3,HLA-DRA,PIK3R6,PRKAR1A,GRB2,ICOS,TIGIT,IL7,HLA-A,HLA-DQB1,ERBB2,RAC2,CCR7,DOCK8,STAT5B
GO:BP	positive regulation of T cell receptor signaling pathway	GO:0050862	1	0	14	601	1	18123	CCR7
GO:BP	positive regulation of antigen receptor-mediated signaling pathway	GO:0050857	1	0	24	601	1	18123	CCR7
GO:BP	negative regulation of coagulation	GO:0050819	1	0	61	601	1	18123	EDN1
GO:BP	regulation of T cell receptor signaling pathway	GO:0050856	1	0	41	601	1	18123	CCR7
GO:BP	regulation of antigen receptor-mediated signaling pathway	GO:0050854	1	0	68	601	2	18123	CD19,CCR7
GO:BP	B cell receptor signaling pathway	GO:0050853	1	0	135	601	3	18123	CD79B,CD19,MS4A1
GO:BP	T cell receptor signaling pathway	GO:0050852	1	0	202	601	8	18123	HLA-DRA,PSMD12,PSMB10,PSMB3,HLA-A,CCR7,HLA-DQA1,PSMC5
GO:BP	positive regulation of leukocyte proliferation	GO:0070665	1	0	155	601	8	18123	CCL19,CCL5,LGALS9,RASAL3,CD320,IL7,HLA-A,STAT5B
GO:BP	positive regulation of calcium-mediated signaling	GO:0050850	1	0	31	601	1	18123	AKAP6
GO:BP	regulation of calcium-mediated signaling	GO:0050848	1	0	72	601	2	18123	MAPT,AKAP6
GO:BP	defense response to fungus	GO:0050832	1	0	42	601	1	18123	GNLY
GO:BP	defense response to Gram-positive bacterium	GO:0050830	1	0	102	601	3	18123	LBP,LYZ,HLA-A
GO:BP	defense response to Gram-negative bacterium	GO:0050829	1	0	88	601	3	18123	LBP,LYZ,GALP
GO:BP	regulation of B cell receptor signaling pathway	GO:0050855	1	0	29	601	1	18123	CD19
GO:BP	homeostasis of number of cells	GO:0048872	1	0	273	601	10	18123	LGALS9,EPB42,SOX9,SLC4A1,THRA,STAT3,IL7,KAT7,CCR7,STAT5B
GO:BP	regulation of dendrite development	GO:0050773	1	0	104	601	4	18123	FAT3,ANAPC2,PTPRD,PREX1
GO:BP	negative regulation of axonogenesis	GO:0050771	1	0	68	601	4	18123	ARHGDIA,SEMA6C,WNT3,NGFR
GO:BP	negative regulation of lymphocyte proliferation	GO:0050672	1	0	87	601	3	18123	LGALS9,PRKAR1A,ERBB2
GO:BP	positive regulation of lymphocyte proliferation	GO:0050671	1	0	141	601	8	18123	CCL19,CCL5,LGALS9,RASAL3,CD320,IL7,HLA-A,STAT5B
GO:BP	regulation of lymphocyte proliferation	GO:0050670	1	0	232	601	11	18123	CCL19,CCL5,LGALS9,RASAL3,PRKAR1A,CD320,IL7,HLA-A,ERBB2,RAC2,STAT5B
GO:BP	hydrogen peroxide biosynthetic process	GO:0050665	1	0	17	601	2	18123	STAT3,CYP1A1
GO:BP	RNA transport	GO:0050658	1	0	183	601	8	18123	KIF5C,SRSF1,CASC3,NXF3,IGF2BP1,SIDT1,ALKBH5,IGF2BP2
GO:BP	nucleic acid transport	GO:0050657	1	0	183	601	8	18123	KIF5C,SRSF1,CASC3,NXF3,IGF2BP1,SIDT1,ALKBH5,IGF2BP2
GO:BP	dermatan sulfate proteoglycan metabolic process	GO:0050655	1	0	17	601	2	18123	NCAN,BGN
GO:BP	chondroitin sulfate proteoglycan metabolic process	GO:0050654	1	0	45	601	2	18123	NCAN,BGN
GO:BP	dermatan sulfate proteoglycan biosynthetic process	GO:0050651	1	0	15	601	2	18123	NCAN,BGN
GO:BP	epithelial cell proliferation	GO:0050673	1	0	460	601	22	18123	NR1D1,COL8A1,IGFBP4,NODAL,NME2,GRN,SOX9,UHRF1,NF1,XDH,RPTOR,SIRT6,STAT3,NGFR,PKHD1,IQGAP3,CYP7B1,ERBB2,NME1,SFRP2,RGCC,STXBP4
GO:BP	chondroitin sulfate proteoglycan biosynthetic process	GO:0050650	1	0	30	601	2	18123	NCAN,BGN
GO:BP	amyloid-beta metabolic process	GO:0050435	1	0	68	601	2	18123	SPON1,BECN1
GO:BP	positive regulation of viral transcription	GO:0050434	1	0	24	601	2	18123	POLR2E,SUPT4H1
GO:BP	3'-phosphoadenosine 5'-phosphosulfate biosynthetic process	GO:0050428	1	0	6	601	1	18123	PAPSS2
GO:BP	3'-phosphoadenosine 5'-phosphosulfate metabolic process	GO:0050427	1	0	26	601	2	18123	SULT2B1,PAPSS2
GO:BP	chromosome localization	GO:0050000	1	0	84	601	2	18123	KPNB1,BECN1
GO:BP	peripheral nervous system neuron axonogenesis	GO:0048936	1	0	2	601	1	18123	NEFH
GO:BP	peripheral nervous system neuron development	GO:0048935	1	0	12	601	1	18123	NEFH
GO:BP	peripheral nervous system neuron differentiation	GO:0048934	1	0	12	601	1	18123	NEFH
GO:BP	sensory system development	GO:0048880	1	0	386	601	16	18123	COL8A1,CPAMD8,CRYBA4,CRYGA,LAMC3,SOX9,NF1,FAT3,RPE65,STAT3,ATP2B1,CYP1A1,ITGAM,SDK2,UNC45B,SLC39A5
GO:BP	arachidonic acid secretion	GO:0050482	1	0	32	601	1	18123	PLA2G4F
GO:BP	positive regulation of axonogenesis	GO:0050772	1	0	84	601	5	18123	MAPT,ARHGDIA,WNT3,NGFR,ANAPC2
GO:BP	regulation of epithelial cell proliferation	GO:0050678	1	0	401	601	20	18123	NR1D1,NODAL,NME2,GRN,SOX9,UHRF1,NF1,XDH,RPTOR,SIRT6,STAT3,NGFR,PKHD1,IQGAP3,CYP7B1,ERBB2,NME1,SFRP2,RGCC,STXBP4
GO:BP	negative regulation of epithelial cell proliferation	GO:0050680	1	0	178	601	6	18123	SOX9,NF1,XDH,NGFR,SFRP2,RGCC
GO:BP	regulation of axonogenesis	GO:0050770	1	0	159	601	7	18123	MAPT,CHN1,ARHGDIA,SEMA6C,WNT3,NGFR,ANAPC2
GO:BP	positive regulation of neurogenesis	GO:0050769	1	0	233	601	6	18123	MAPT,ARHGDIA,WNT3,NGFR,ANAPC2,PTPRD
GO:BP	negative regulation of neurogenesis	GO:0050768	1	0	146	601	8	18123	NR1D1,ARHGDIA,NF1,SEMA6C,WNT3,TMEM98,ABCC8,NGFR
GO:BP	regulation of neurogenesis	GO:0050767	1	0	373	601	11	18123	MAPT,NR1D1,ARHGDIA,NF1,SEMA6C,WNT3,TMEM98,ABCC8,NGFR,ANAPC2,PTPRD
GO:BP	positive regulation of phagocytosis	GO:0050766	1	0	68	601	1	18123	LMAN2
GO:BP	negative regulation of phagocytosis	GO:0050765	1	0	25	601	1	18123	FER1L5
GO:BP	regulation of phagocytosis	GO:0050764	1	0	100	601	4	18123	FER1L5,PRKCG,LMAN2,SPHK1
GO:BP	negative regulation of peptidyl-tyrosine phosphorylation	GO:0050732	1	0	59	601	2	18123	SFRP2,SOCS3
GO:BP	positive regulation of peptidyl-tyrosine phosphorylation	GO:0050731	1	0	199	601	6	18123	CCL5,ENPP2,STAT3,LILRA5,ANGPT4,SOCS3
GO:BP	positive regulation of epithelial cell proliferation	GO:0050679	1	0	213	601	13	18123	NODAL,NME2,GRN,SOX9,RPTOR,SIRT6,STAT3,PKHD1,IQGAP3,CYP7B1,ERBB2,NME1,STXBP4
GO:BP	regulation of peptidyl-tyrosine phosphorylation	GO:0050730	1	0	270	601	8	18123	CCL5,ENPP2,STAT3,LILRA5,IL7,SFRP2,ANGPT4,SOCS3
GO:BP	negative regulation of inflammatory response	GO:0050728	1	0	359	601	13	18123	NR1D1,GRN,CYSLTR2,RAMP2,INSL3,PRKAR1A,PTH1R,PPARA,TSHB,TSHR,ADCY1,NLRP12,SOCS3
GO:BP	regulation of inflammatory response	GO:0050727	1	0	565	601	23	18123	NR1D1,ZBP1,CCL5,GRN,LBP,CYSLTR2,RAMP2,INSL3,PRKAR1A,IFI35,GPX4,PTH1R,LILRA5,PPARA,MMP9,TSHB,TSHR,ADCY1,SPHK1,NLRP12,CCR7,STAT5B,SOCS3
GO:BP	positive regulation of protein secretion	GO:0050714	1	0	137	601	3	18123	RPH3AL,ARF1,TRPM2
GO:BP	negative regulation of protein secretion	GO:0050709	1	0	78	601	1	18123	ABCC8
GO:BP	regulation of protein secretion	GO:0050708	1	0	293	601	8	18123	NR1D1,CCL5,RPH3AL,LLGL2,ABCC8,ARF1,TRPM2,STXBP4
GO:BP	regulation of defense response to virus by virus	GO:0050690	1	0	29	601	1	18123	ARF1
GO:BP	regulation of defense response to virus	GO:0050688	1	0	71	601	3	18123	DHX58,SEC14L1,TSPAN32
GO:BP	negative regulation of defense response to virus	GO:0050687	1	0	24	601	2	18123	DHX58,SEC14L1
GO:BP	regulation of mRNA processing	GO:0050684	1	0	145	601	2	18123	NSRP1,KHDRBS2
GO:BP	positive regulation of inflammatory response	GO:0050729	1	0	142	601	8	18123	ZBP1,GRN,LBP,IFI35,LILRA5,NLRP12,CCR7,STAT5B
GO:BP	negative regulation of biological process	GO:0048519	1	0	5861	601	215	18123	COL1A1,MAPT,NR1D1,ADAMDEC1,PPP1R9B,CCL23,SLN,TNFRSF11B,DLEC1,CCL19,LRPAP1,IGFBP4,DUSP14,CCL5,LGALS9,SP2,P2RY6,RASAL3,ELF3,CPAMD8,SOSTDC1,NODAL,NME2,TAOK1,GRK4,GRN,KPTN,CNN1,TMC8,TEN1,SULT2B1,VIL1,GRID2IP,UNK,BRCA1,LBP,NRROS,RNF43,ZNF529,TENC1,DAND5,SOX9,TAC4,CTIF,POLR2E,VAT1,CASC3,ZNF541,FER1L5,EDN1,RPL38,MYT1L,TLL2,ARHGDIA,DCLK1,GREM2,DGKI,SLC4A1,RPL19,TSKS,UHRF1,NF1,SPON1,PLAC8,TRIM37,DHX58,PSM…
GO:BP	positive regulation of biological process	GO:0048518	1	0	6474	601	218	18123	COL1A1,MAPT,NR1D1,CLDN4,UBTF,PPP1R9B,ZNF341,CCL23,SLN,CA7,SLC5A3,COL8A1,CCL19,LRPAP1,ZBP1,ITGA2B,IGFBP4,CCL5,KRT17,LGALS9,CCL14,P2RY6,RASAL3,HLA-DRA,ELF3,MUC17,MYRF,NODAL,CCL27,NME2,NOS1AP,RSPO1,TAOK1,GRN,LRRC59,SULT2B1,CD79B,VIL1,RPH3AL,BRCA1,LBP,SRSF1,SAP30BP,SLC4A4,ENPP2,DCXR,SOX9,GPC2,FGD2,TAC4,CTIF,POLR2E,CROCC,PLEKHA4,RAB34,MUC3A,EDN1,ANAPC11,ARHGDIA,HBA2,DGKI,SLC1A2,UHRF1,PIK3R6,NF1,SH2D1B…
GO:BP	spermatid differentiation	GO:0048515	1	0	168	601	4	18123	RFX2,TTLL1,SUN5,ELSPBP1
GO:BP	lymphocyte activation	GO:0046649	1	0	780	601	33	18123	CCL19,CCL5,LGALS9,RASAL3,HLA-DRA,CD79B,PIK3R6,PRKAR1A,CD19,HLA-F,CD320,STAT3,KLRC2,GRB2,ICOS,TIGIT,PSMB10,C17ORF99,TMEM98,IL7,HLA-A,TSHR,CASP8,HLA-DQB1,ERBB2,RAC2,KAT7,CCR7,HDAC5,DOCK8,STAT5B,MS4A1,PREX1
GO:BP	positive regulation of gamma-delta T cell activation	GO:0046645	1	0	8	601	1	18123	STAT5B
GO:BP	regulation of gamma-delta T cell activation	GO:0046643	1	0	10	601	1	18123	STAT5B
GO:BP	negative regulation of alpha-beta T cell proliferation	GO:0046642	1	0	14	601	1	18123	LGALS9
GO:BP	positive regulation of alpha-beta T cell proliferation	GO:0046641	1	0	21	601	3	18123	LGALS9,RASAL3,HLA-A
GO:BP	regulation of alpha-beta T cell proliferation	GO:0046640	1	0	36	601	3	18123	LGALS9,RASAL3,HLA-A
GO:BP	positive regulation of alpha-beta T cell differentiation	GO:0046638	1	0	50	601	3	18123	CCL19,LGALS9,HLA-DRA
GO:BP	regulation of alpha-beta T cell differentiation	GO:0046637	1	0	68	601	3	18123	CCL19,LGALS9,HLA-DRA
GO:BP	negative regulation of alpha-beta T cell activation	GO:0046636	1	0	43	601	1	18123	LGALS9
GO:BP	lymphocyte proliferation	GO:0046651	1	0	296	601	15	18123	CCL19,CCL5,LGALS9,RASAL3,PRKAR1A,CD19,CD320,PSMB10,IL7,HLA-A,ERBB2,RAC2,DOCK8,STAT5B,MS4A1
GO:BP	positive regulation of alpha-beta T cell activation	GO:0046635	1	0	67	601	6	18123	CCL19,LGALS9,RASAL3,HLA-DRA,HLA-A,HLA-DQB1
GO:BP	alpha-beta T cell proliferation	GO:0046633	1	0	39	601	3	18123	LGALS9,RASAL3,HLA-A
GO:BP	alpha-beta T cell differentiation	GO:0046632	1	0	113	601	5	18123	CCL19,LGALS9,HLA-DRA,STAT3,TMEM98
GO:BP	alpha-beta T cell activation	GO:0046631	1	0	157	601	8	18123	CCL19,LGALS9,RASAL3,HLA-DRA,STAT3,TMEM98,HLA-A,HLA-DQB1
GO:BP	gamma-delta T cell activation	GO:0046629	1	0	18	601	1	18123	STAT5B
GO:BP	negative regulation of insulin receptor signaling pathway	GO:0046627	1	0	37	601	5	18123	TENC1,GPR21,TRIM72,PIP4K2B,SOCS3
GO:BP	regulation of insulin receptor signaling pathway	GO:0046626	1	0	69	601	5	18123	TENC1,GPR21,TRIM72,PIP4K2B,SOCS3
GO:BP	positive regulation of organ growth	GO:0046622	1	0	61	601	3	18123	EDN1,IL7,AKAP6
GO:BP	negative regulation of organ growth	GO:0046621	1	0	40	601	2	18123	CAV3,PPARA
GO:BP	regulation of organ growth	GO:0046620	1	0	111	601	5	18123	EDN1,CAV3,PPARA,IL7,AKAP6
GO:BP	regulation of alpha-beta T cell activation	GO:0046634	1	0	104	601	6	18123	CCL19,LGALS9,RASAL3,HLA-DRA,HLA-A,HLA-DQB1
GO:BP	negative regulation of centrosome cycle	GO:0046606	1	0	12	601	2	18123	BRCA1,TRIM37
GO:BP	folic acid metabolic process	GO:0046655	1	0	19	601	1	18123	SLC46A1
GO:BP	male sex differentiation	GO:0046661	1	0	166	601	4	18123	SOX9,INSL3,SFRP2,STAT5B
GO:BP	lipid phosphorylation	GO:0046834	1	0	15	601	2	18123	DGKI,SPHK1
GO:BP	regulation of protein export from nucleus	GO:0046825	1	0	33	601	1	18123	IFI27
GO:BP	positive regulation of nucleocytoplasmic transport	GO:0046824	1	0	65	601	1	18123	JUP
GO:BP	regulation of nucleocytoplasmic transport	GO:0046822	1	0	111	601	2	18123	IFI27,JUP
GO:BP	transport of virus	GO:0046794	1	0	64	601	2	18123	MVB12A,KPNB1
GO:BP	microtubule polymerization	GO:0046785	1	0	83	601	3	18123	MAPT,CAV3,TBCD
GO:BP	regulation of viral transcription	GO:0046782	1	0	41	601	2	18123	POLR2E,SUPT4H1
GO:BP	protein autophosphorylation	GO:0046777	1	0	234	601	7	18123	NME2,TAOK1,ULK2,PRKCG,WNK2,ERBB2,NLRP12
GO:BP	viral budding	GO:0046755	1	0	26	601	1	18123	MVB12A
GO:BP	female sex differentiation	GO:0046660	1	0	116	601	3	18123	HSPA5,GAS2,STAT5B
GO:BP	viral entry into host cell	GO:0046718	1	0	143	601	1	18123	LGALS9
GO:BP	muscle cell cellular homeostasis	GO:0046716	1	0	21	601	2	18123	CAV3,LARGE
GO:BP	heterocycle catabolic process	GO:0046700	1	0	617	601	20	18123	CTIF,CASC3,RPL38,RPL19,PSMD12,XDH,IGF2BP1,CYP1A1,KPNB1,PSMB10,PSMB3,PAM16,RPL27,NT5C3B,DHX34,RPL23,PATL1,ALKBH5,IGF2BP2,PSMC5
GO:BP	response to copper ion	GO:0046688	1	0	42	601	3	18123	CYP1A1,MT1M,BECN1
GO:BP	response to cadmium ion	GO:0046686	1	0	68	601	2	18123	MT1M,MMP9
GO:BP	response to arsenic-containing substance	GO:0046685	1	0	34	601	2	18123	TNFRSF11B,CYP1A1
GO:BP	response to pyrethroid	GO:0046684	1	0	4	601	1	18123	DDC
GO:BP	response to organophosphorus	GO:0046683	1	0	136	601	7	18123	COL1A1,P2RY6,HSPA5,PTAFR,SLC5A5,NME1,AKAP6
GO:BP	response to antibiotic	GO:0046677	1	0	49	601	6	18123	HSPA5,CYP1A1,RPL23,CASP8,PLA2G4F,KAT7
GO:BP	negative regulation of insulin secretion	GO:0046676	1	0	39	601	1	18123	ABCC8
GO:BP	acid secretion	GO:0046717	1	0	45	601	2	18123	SLC9A3R1,ABCB4
GO:BP	carbohydrate phosphorylation	GO:0046835	1	0	26	601	1	18123	KHK
GO:BP	regulation of centrosome cycle	GO:0046605	1	0	49	601	3	18123	BRCA1,TRIM37,PKHD1
GO:BP	regulation of centriole replication	GO:0046599	1	0	21	601	2	18123	BRCA1,TRIM37
GO:BP	glycerophospholipid biosynthetic process	GO:0046474	1	0	259	601	10	18123	PLEKHA4,DGKI,PIK3R6,PGAP3,TPTE2,PITPNM3,PLA2G4D,PIP4K2B,ARF1,SOCS3
GO:BP	phosphatidic acid metabolic process	GO:0046473	1	0	53	601	2	18123	DGKI,PLA2G4D
GO:BP	phosphatidylglycerol metabolic process	GO:0046471	1	0	37	601	2	18123	PLA2G4D,PLA2G4F
GO:BP	phosphatidylcholine metabolic process	GO:0046470	1	0	90	601	3	18123	ENPP2,PLA2G4D,PLA2G4F
GO:BP	membrane lipid biosynthetic process	GO:0046467	1	0	151	601	4	18123	PGAP3,ST8SIA5,LARGE,SPHK1
GO:BP	membrane lipid catabolic process	GO:0046466	1	0	37	601	2	18123	ENPP2,SPHK1
GO:BP	prostanoid biosynthetic process	GO:0046457	1	0	33	601	3	18123	EDN1,PTGDS,PLA2G4F
GO:BP	icosanoid biosynthetic process	GO:0046456	1	0	57	601	4	18123	EDN1,PTGDS,PLA2G4F,CYP2C9
GO:BP	organophosphate catabolic process	GO:0046434	1	0	156	601	5	18123	ENPP2,XDH,GDPD1,PLA2G4D,PLA2G4F
GO:BP	glycerophospholipid catabolic process	GO:0046475	1	0	32	601	4	18123	ENPP2,GDPD1,PLA2G4D,PLA2G4F
GO:BP	positive regulation of receptor signaling pathway via JAK-STAT	GO:0046427	1	0	46	601	1	18123	CCL5
GO:BP	regulation of receptor signaling pathway via JAK-STAT	GO:0046425	1	0	108	601	3	18123	CCL5,PTPRD,SOCS3
GO:BP	carboxylic acid catabolic process	GO:0046395	1	0	245	601	4	18123	DCXR,SARDH,PPARA,AKT2
GO:BP	carboxylic acid biosynthetic process	GO:0046394	1	0	318	601	11	18123	NR1D1,BRCA1,EDN1,PTGDS,GPX4,PLOD3,CYP1A1,ACSM5,CYP7B1,PLA2G4F,CYP2C9
GO:BP	ribose phosphate biosynthetic process	GO:0046390	1	0	199	601	7	18123	NME2,STAT3,UQCC3,PAPSS2,PPARA,ADCY1,NME1
GO:BP	deoxyribose phosphate catabolic process	GO:0046386	1	0	29	601	1	18123	XDH
GO:BP	monosaccharide catabolic process	GO:0046365	1	0	60	601	2	18123	ALDOC,KHK
GO:BP	monosaccharide biosynthetic process	GO:0046364	1	0	99	601	2	18123	ALDOC,PPARA
GO:BP	diacylglycerol metabolic process	GO:0046339	1	0	25	601	1	18123	DGKI
GO:BP	positive regulation of JNK cascade	GO:0046330	1	0	87	601	4	18123	CCL19,TAOK1,GADD45B,CCR7
GO:BP	negative regulation of receptor signaling pathway via JAK-STAT	GO:0046426	1	0	31	601	2	18123	PTPRD,SOCS3
GO:BP	negative regulation of centriole replication	GO:0046600	1	0	7	601	2	18123	BRCA1,TRIM37
GO:BP	heterocycle metabolic process	GO:0046483	1	0	5929	601	153	18123	COL1A1,MAPT,NR1D1,UBTF,PPP1R9B,ZNF341,DDX52,PHRF1,LGALS9,NSRP1,SP2,ELF3,MYRF,NODAL,NME2,TAOK1,TEN1,SULT2B1,BRCA1,ZNF529,SRSF1,SAP30BP,AARSD1,SLC4A4,ENPP2,DAND5,SOX9,CTIF,RFX2,POLR2E,ZNF682,ALDOC,CASC3,ZNF541,TTR,EDN1,RPL38,DUS1L,MYT1L,DHX8,SLC4A1,RPL19,UHRF1,PLAC8,TRIM37,PSMD12,BPTF,SLC25A39,AK7,H3F3B,HSPA5,XDH,MAP2K3,PRKCG,GGH,CHAF1A,SLC28A2,NWD1,ZNF710,THRA,PRKAR1A,IGF2BP1,RPTOR,ZC3H7B,ZNF35,DD…
GO:BP	glycerolipid metabolic process	GO:0046486	1	0	436	601	14	18123	ENPP2,PLEKHA4,DGKI,PIK3R6,GDPD1,PGAP3,CAV3,TPTE2,PITPNM3,PLA2G4D,PLA2G4F,PIP4K2B,ARF1,SOCS3
GO:BP	positive regulation of viral entry into host cell	GO:0046598	1	0	12	601	1	18123	LGALS9
GO:BP	regulation of viral entry into host cell	GO:0046596	1	0	44	601	1	18123	LGALS9
GO:BP	negative regulation of Ras protein signal transduction	GO:0046580	1	0	51	601	2	18123	RASAL3,TIMP2
GO:BP	positive regulation of Ras protein signal transduction	GO:0046579	1	0	75	601	6	18123	LRRC59,DGKI,RASGRF1,SYNPO2L,GRB2,P2RY8
GO:BP	regulation of Ras protein signal transduction	GO:0046578	1	0	202	601	12	18123	RASAL3,LRRC59,ARHGDIA,DGKI,TIMP2,RASGRF1,CYTH3,SYNPO2L,GRB2,P2RY8,MYO9B,STARD13
GO:BP	development of primary male sexual characteristics	GO:0046546	1	0	144	601	3	18123	SOX9,INSL3,SFRP2
GO:BP	development of primary female sexual characteristics	GO:0046545	1	0	102	601	3	18123	HSPA5,GAS2,STAT5B
GO:BP	development of secondary male sexual characteristics	GO:0046544	1	0	1	601	1	18123	STAT5B
GO:BP	development of secondary female sexual characteristics	GO:0046543	1	0	7	601	1	18123	STAT5B
GO:BP	ether lipid metabolic process	GO:0046485	1	0	20	601	1	18123	DHRS7B
GO:BP	negative regulation of photoreceptor cell differentiation	GO:0046533	1	0	6	601	1	18123	SOX9
GO:BP	photoreceptor cell differentiation	GO:0046530	1	0	65	601	4	18123	SOX9,IFT20,STAT3,SDK2
GO:BP	sphingoid catabolic process	GO:0046521	1	0	1	601	1	18123	SPHK1
GO:BP	sphingoid biosynthetic process	GO:0046520	1	0	14	601	1	18123	SPHK1
GO:BP	sphingoid metabolic process	GO:0046519	1	0	22	601	1	18123	SPHK1
GO:BP	ceramide biosynthetic process	GO:0046513	1	0	70	601	1	18123	SPHK1
GO:BP	sphingosine biosynthetic process	GO:0046512	1	0	14	601	1	18123	SPHK1
GO:BP	glycerol ether biosynthetic process	GO:0046504	1	0	11	601	1	18123	DHRS7B
GO:BP	glycerolipid catabolic process	GO:0046503	1	0	74	601	4	18123	ENPP2,GDPD1,PLA2G4D,PLA2G4F
GO:BP	phosphatidylinositol metabolic process	GO:0046488	1	0	184	601	10	18123	PLEKHA4,PIK3R6,PGAP3,TPTE2,PITPNM3,PLA2G4D,PLA2G4F,PIP4K2B,ARF1,SOCS3
GO:BP	regulation of photoreceptor cell differentiation	GO:0046532	1	0	6	601	1	18123	SOX9
GO:BP	phospholipid dephosphorylation	GO:0046839	1	0	46	601	2	18123	TPTE2,LPPR2
GO:BP	filopodium assembly	GO:0046847	1	0	63	601	5	18123	PPP1R9B,ITGB4,FGD2,TRPM2,CCR7
GO:BP	bone remodeling	GO:0046849	1	0	94	601	5	18123	TNFRSF11B,NF1,PTH1R,IL7,RAC2
GO:BP	mitochondrion distribution	GO:0048311	1	0	16	601	1	18123	MAPT
GO:BP	organelle fission	GO:0048285	1	0	544	601	16	18123	MAPT,PPP1R9B,EDN1,ANAPC11,PRKAR1A,KPNB1,EME1,SLX4,MOV10L1,SYCE2,RAD51C,RAD51D,BECN1,SPHK1,ANAPC2,RGCC
GO:BP	organelle fusion	GO:0048284	1	0	149	601	8	18123	VAT1,FER1L5,RAB34,GOSR1,GOSR2,PIP4K2B,SPHK1,AKT2
GO:BP	vesicle fusion with Golgi apparatus	GO:0048280	1	0	8	601	1	18123	GOSR2
GO:BP	vesicle docking	GO:0048278	1	0	64	601	2	18123	UNC13A,STXBP3
GO:BP	response to pain	GO:0048265	1	0	29	601	1	18123	PRKCG
GO:BP	determination of dorsal identity	GO:0048263	1	0	8	601	1	18123	SOSTDC1
GO:BP	determination of dorsal/ventral asymmetry	GO:0048262	1	0	9	601	1	18123	SOSTDC1
GO:BP	negative regulation of receptor-mediated endocytosis	GO:0048261	1	0	35	601	2	18123	LRPAP1,SH3GL3
GO:BP	intracellular distribution of mitochondria	GO:0048312	1	0	8	601	1	18123	MAPT
GO:BP	positive regulation of receptor-mediated endocytosis	GO:0048260	1	0	53	601	1	18123	CCL19
GO:BP	mRNA stabilization	GO:0048255	1	0	57	601	1	18123	IGF2BP1
GO:BP	lymphocyte chemotaxis	GO:0048247	1	0	63	601	8	18123	CCL23,CCL19,CCL5,CCL14,CCL27,CXCL13,CYP7B1,CCL3L1
GO:BP	macrophage chemotaxis	GO:0048246	1	0	40	601	2	18123	CCL5,MMP28
GO:BP	eosinophil chemotaxis	GO:0048245	1	0	19	601	1	18123	CCL5
GO:BP	sperm capacitation	GO:0048240	1	0	30	601	1	18123	ELSPBP1
GO:BP	negative regulation of DNA recombination at telomere	GO:0048239	1	0	34	601	1	18123	POLR2E
GO:BP	male gamete generation	GO:0048232	1	0	583	601	20	18123	MROH2B,SPAG11A,SOX9,GTSF1,RFX2,ZNF541,TTLL1,SPATA20,INSL3,ADAM28,FAM50A,ZNF35,GPX4,IFT20,MOV10L1,RAD51C,SUN5,ALKBH5,DUSP13,ELSPBP1
GO:BP	regulation of vesicle targeting, to, from or within Golgi	GO:0048209	1	0	1	601	1	18123	GOSR1
GO:BP	COPII vesicle coating	GO:0048208	1	0	65	601	1	18123	GOSR2
GO:BP	regulation of receptor-mediated endocytosis	GO:0048259	1	0	113	601	5	18123	CCL19,LRPAP1,RSPO1,SH3GL3,ARF1
GO:BP	vesicle targeting, rough ER to cis-Golgi	GO:0048207	1	0	65	601	1	18123	GOSR2
GO:BP	axial mesoderm development	GO:0048318	1	0	7	601	2	18123	NODAL,RPL38
GO:BP	axial mesoderm formation	GO:0048320	1	0	2	601	1	18123	NODAL
GO:BP	blood vessel morphogenesis	GO:0048514	1	0	715	601	31	18123	MYO18B,COL8A1,NODAL,GRN,BRCA1,ENPP2,EDN1,PIK3R6,NF1,XDH,RAMP2,ASB4,SIRT6,STAT3,CARD10,COL18A1,ABCC8,JUP,CXCL13,NGFR,CASP8,ERBB2,STARD13,SFRP2,SPHK1,HDAC5,ANGPT4,PLXDC1,RGCC,ACTG1,RSPO3
GO:BP	animal organ development	GO:0048513	1	0	3701	601	146	18123	COL1A1,KRT23,CHRND,CLDN4,PPP1R9B,PDZD7,SGCA,TNFRSF11B,ITGB4,KRT19,COL8A1,CCL19,ITGA2B,KRT17,LGALS9,HLA-DRA,ELF3,CPAMD8,SOSTDC1,NODAL,NME2,COPRS,CD79B,NRROS,SRSF1,CRYBA4,TENC1,EPB42,CRYGA,DAND5,LAMC3,SOX9,PLEKHA4,EDN1,RPL38,TLL2,DCLK1,GREM2,SLC4A1,KIRREL3,SLC1A2,RPL19,PIK3R6,NF1,KRT39,PSMD12,BPTF,ACAN,FAT3,H3F3B,HSPA5,XDH,ADD2,TTLL1,APCDD1,THRA,RAMP2,INSL3,PRKAR1A,SEMA6C,IGF2BP1,KRT16,CAV3,CD19,KR…
GO:BP	circadian behavior	GO:0048512	1	0	48	601	3	18123	NR1D1,ANKFN1,PTGDS
GO:BP	rhythmic process	GO:0048511	1	0	307	601	15	18123	NR1D1,CLDN4,ANKFN1,HSPA5,PRKCG,PTGDS,RPE65,HS3ST2,PPARA,NGFR,GAS2,ADCY1,DDC,TRPM2,STAT5B
GO:BP	regulation of timing of cell differentiation	GO:0048505	1	0	7	601	1	18123	NODAL
GO:BP	synaptic vesicle transport	GO:0048489	1	0	46	601	4	18123	KIF5C,KIF5A,LIN7A,ARF1
GO:BP	synaptic vesicle endocytosis	GO:0048488	1	0	64	601	2	18123	NLGN3,ACTG1
GO:BP	sympathetic nervous system development	GO:0048485	1	0	21	601	1	18123	NF1
GO:BP	autonomic nervous system development	GO:0048483	1	0	47	601	1	18123	NF1
GO:BP	axial mesoderm morphogenesis	GO:0048319	1	0	3	601	1	18123	NODAL
GO:BP	oogenesis	GO:0048477	1	0	94	601	1	18123	INSL3
GO:BP	cell development	GO:0048468	1	0	2122	601	88	18123	MAPT,NR1D1,PPP1R9B,PDZD7,ITGB4,KRT19,CCL19,CHN1,MYRF,NODAL,NME2,KIF5C,TAOK1,GRN,UNK,NRROS,ULK2,EPB42,LRTM1,LAMC3,SOX9,GPC2,RFX2,FER1L5,EDN1,MYT1L,ARHGDIA,NEFH,DCLK1,SLC4A1,KIRREL3,NF1,ACAN,FAT3,HSPA5,TTLL1,RASGRF1,RAMP2,INSL3,PRKAR1A,SEMA6C,IGF2BP1,EHD1,CAV3,PLOD3,IFT20,SIRT6,KRT8,WNT3,PTH1R,SYNPO2L,STAC3,TBCD,PPARA,RNF157,MOV10L1,GRB2,UNC13A,NLGN3,COL18A1,TMEM98,ABCC8,CDH23,MSI2,TMOD4,NGFR,KIF5A…
GO:BP	retinoic acid receptor signaling pathway	GO:0048384	1	0	33	601	1	18123	ESRRG
GO:BP	mesendoderm development	GO:0048382	1	0	9	601	1	18123	NODAL
GO:BP	lateral mesoderm development	GO:0048368	1	0	14	601	2	18123	NODAL,DAND5
GO:BP	mesodermal cell differentiation	GO:0048333	1	0	34	601	3	18123	ITGB4,NODAL,SFRP2
GO:BP	mesoderm morphogenesis	GO:0048332	1	0	77	601	5	18123	ITGB4,NODAL,PRKAR1A,WNT3,SFRP2
GO:BP	axial mesodermal cell fate specification	GO:0048327	1	0	1	601	1	18123	NODAL
GO:BP	axial mesodermal cell fate commitment	GO:0048322	1	0	1	601	1	18123	NODAL
GO:BP	axial mesodermal cell differentiation	GO:0048321	1	0	1	601	1	18123	NODAL
GO:BP	cell maturation	GO:0048469	1	0	173	601	5	18123	CCL19,EPB42,INSL3,PTH1R,ELSPBP1
GO:BP	vesicle targeting, trans-Golgi to endosome	GO:0048203	1	0	2	601	1	18123	WIPI1
GO:BP	vesicle targeting, to, from or within Golgi	GO:0048199	1	0	73	601	3	18123	GOSR1,GOSR2,WIPI1
GO:BP	Golgi vesicle transport	GO:0048193	1	0	415	601	10	18123	COPZ2,RAB34,GOSR1,GOSR2,CYTH3,VPS13A,KIF5A,WIPI1,LMAN2,ARF1
GO:BP	hydroxylysine metabolic process	GO:0046946	1	0	2	601	1	18123	PLOD3
GO:BP	carboxylic acid transport	GO:0046942	1	0	280	601	17	18123	LRRC8E,SLC36A2,EDN1,LLGL2,SLC1A2,ABCC3,ABCC11,PQLC2,SLC46A1,ATP1A2,SLC9A3R1,SLC7A6,PLA2G4F,SLC38A7,SLC7A9,ABCB4,SLC38A5
GO:BP	nucleoside monophosphate phosphorylation	GO:0046940	1	0	12	601	1	18123	AK7
GO:BP	nucleotide phosphorylation	GO:0046939	1	0	137	601	8	18123	NME2,SLC4A4,ALDOC,SLC4A1,AK7,STAT3,PPARA,NME1
GO:BP	regulation of neurotransmitter secretion	GO:0046928	1	0	92	601	3	18123	DGKI,PRKCG,ADCY1
GO:BP	cellular transition metal ion homeostasis	GO:0046916	1	0	122	601	8	18123	TMEM199,PRND,MT1M,TFR2,SLC46A1,ARF1,SLC39A5,TMPRSS6
GO:BP	intracellular transport	GO:0046907	1	0	1723	601	56	18123	MAPT,COPZ2,KIF5C,SLC25A6,RPH3AL,SRSF1,RPH3A,NACAD,CASC3,RPL38,NEFH,DCLK1,RPL19,RAB43,HSPA5,NMT1,RAMP2,NXF3,MVB12A,EHD1,GOSR1,IFT20,TMEM201,STAT3,GOSR2,ITGAM,RNF157,KPNB1,NACA2,IFI27,JUP,VPS13A,PAM16,RPL27,NGFR,KIF5A,WIPI1,LMAN2,RPL23,CASP8,ALKBH5,SLC9A3R1,ERBB2,BECN1,RAC2,TBC1D3,USP36,ARF1,PEX6,RUNDC1,AKAP6,STXBP3,MYO15A,AKT2,STXBP4,TBC1D3H
GO:BP	secretion	GO:0046903	1	0	1492	601	61	18123	NR1D1,LGI3,ITGA2B,FRMPD3,CCL5,LGALS9,NME2,GRN,RPH3AL,RPH3A,LGALS3BP,GHDC,VAT1,ALDOC,TTR,LYZ,EDN1,LLGL2,DGKI,PLAC8,PSMD12,TIMP2,XDH,ABCC3,PRKCG,GGH,PTGDS,TVP23A,TMC6,HLA-F,HLA-B,KLRC2,ITGAM,KPNB1,UNC13A,PTAFR,MMP9,ABCC8,JUP,TFR2,PIGR,ADCY1,PDAP1,CORIN,F13A1,SLC9A3R1,LIN7A,TRIM72,CXCL1,PLA2G4F,RAC2,NME1,ARF1,TRPM2,CACNA1G,STXBP3,ABCB4,STAT5B,SIGLEC5,RGCC,STXBP4
GO:BP	regulation of mitochondrial membrane permeability	GO:0046902	1	0	83	601	3	18123	NMT1,STAT3,CASP8
GO:BP	hydroxylysine biosynthetic process	GO:0046947	1	0	2	601	1	18123	PLOD3
GO:BP	tetrahydrofolylpolyglutamate metabolic process	GO:0046900	1	0	2	601	1	18123	GGH
GO:BP	positive regulation of lipid biosynthetic process	GO:0046889	1	0	88	601	2	18123	NR1D1,PPARA
GO:BP	negative regulation of hormone secretion	GO:0046888	1	0	66	601	2	18123	EDN1,ABCC8
GO:BP	positive regulation of hormone secretion	GO:0046887	1	0	135	601	3	18123	EDN1,TFR2,TRPM2
GO:BP	regulation of hormone secretion	GO:0046883	1	0	274	601	7	18123	NR1D1,CCL5,EDN1,ABCC8,TFR2,TRPM2,STXBP4
GO:BP	hormone secretion	GO:0046879	1	0	317	601	8	18123	NR1D1,CCL5,EDN1,ABCC8,TFR2,TRPM2,STXBP3,STXBP4
GO:BP	phosphatidylinositol dephosphorylation	GO:0046856	1	0	32	601	1	18123	TPTE2
GO:BP	phosphatidylinositol phosphate biosynthetic process	GO:0046854	1	0	59	601	3	18123	PIK3R6,PIP4K2B,SOCS3
GO:BP	negative regulation of bone remodeling	GO:0046851	1	0	19	601	1	18123	TNFRSF11B
GO:BP	regulation of bone remodeling	GO:0046850	1	0	53	601	2	18123	TNFRSF11B,NF1
GO:BP	regulation of lipid biosynthetic process	GO:0046890	1	0	191	601	6	18123	NR1D1,BRCA1,PPARA,KPNB1,DKKL1,SPHK1
GO:BP	nonassociative learning	GO:0046958	1	0	6	601	1	18123	DGKI
GO:BP	habituation	GO:0046959	1	0	4	601	1	18123	DGKI
GO:BP	vesicle transport along microtubule	GO:0047496	1	0	48	601	1	18123	KIF5A
GO:BP	regulation of neuronal synaptic plasticity	GO:0048168	1	0	48	601	1	18123	RASGRF1
GO:BP	regulation of synaptic plasticity	GO:0048167	1	0	189	601	8	18123	MAPT,GRID2IP,DGKI,PRKCG,RASGRF1,ADCY1,ARF1,ANAPC2
GO:BP	behavioral response to cocaine	GO:0048148	1	0	14	601	1	18123	PPP1R1B
GO:BP	negative regulation of fibroblast proliferation	GO:0048147	1	0	34	601	1	18123	NF1
GO:BP	positive regulation of fibroblast proliferation	GO:0048146	1	0	51	601	2	18123	NGFR,SPHK1
GO:BP	regulation of fibroblast proliferation	GO:0048145	1	0	87	601	3	18123	NF1,NGFR,SPHK1
GO:BP	fibroblast proliferation	GO:0048144	1	0	88	601	3	18123	NF1,NGFR,SPHK1
GO:BP	astrocyte activation	GO:0048143	1	0	26	601	3	18123	MAPT,NR1D1,GRN
GO:BP	focal adhesion assembly	GO:0048041	1	0	86	601	1	18123	ACTG1
GO:BP	regulation of mRNA splicing, via spliceosome	GO:0048024	1	0	107	601	2	18123	NSRP1,KHDRBS2
GO:BP	inositol lipid-mediated signaling	GO:0048017	1	0	201	601	12	18123	CCL5,SOX9,EDN1,NF1,PLCH1,TPTE2,PTAFR,SLC9A3R1,ERBB2,BECN1,PIP4K2B,PEAR1
GO:BP	inositol phosphate-mediated signaling	GO:0048016	1	0	57	601	2	18123	EDN1,AKAP6
GO:BP	phosphatidylinositol-mediated signaling	GO:0048015	1	0	197	601	12	18123	CCL5,SOX9,EDN1,NF1,PLCH1,TPTE2,PTAFR,SLC9A3R1,ERBB2,BECN1,PIP4K2B,PEAR1
GO:BP	ephrin receptor signaling pathway	GO:0048013	1	0	88	601	3	18123	CHN1,MMP9,ACTG1
GO:BP	hepatocyte growth factor receptor signaling pathway	GO:0048012	1	0	15	601	2	18123	MUC20,MST1R
GO:BP	neurotrophin TRK receptor signaling pathway	GO:0048011	1	0	34	601	2	18123	GRB2,NGFR
GO:BP	vascular endothelial growth factor receptor signaling pathway	GO:0048010	1	0	99	601	1	18123	NF1
GO:BP	insulin-like growth factor receptor signaling pathway	GO:0048009	1	0	38	601	2	18123	IGFBP4,TRIM72
GO:BP	platelet-derived growth factor receptor signaling pathway	GO:0048008	1	0	59	601	2	18123	IFT20,SLC9A3R1
GO:BP	antigen processing and presentation of peptide antigen	GO:0048002	1	0	193	601	13	18123	ERAP2,HLA-DRA,PSMD12,HLA-F,HLA-B,PSMB10,PSMB3,KIF5A,HLA-A,HLA-DQB1,ARF1,HLA-DQA1,PSMC5
GO:BP	mitochondrion transport along microtubule	GO:0047497	1	0	24	601	1	18123	MAPT
GO:BP	regulation of JNK cascade	GO:0046328	1	0	134	601	5	18123	CCL19,TAOK1,GADD45B,SFRP2,CCR7
GO:BP	response to interleukin-2	GO:0070669	1	0	14	601	1	18123	STAT5B
GO:BP	caveola assembly	GO:0070836	1	0	4	601	1	18123	CAV3
GO:BP	response to interleukin-12	GO:0070671	1	0	50	601	1	18123	ARF1
GO:BP	regulation of oxidative stress-induced neuron death	GO:1903203	1	0	26	601	1	18123	TRPM2
GO:BP	regulation of oxidative stress-induced cell death	GO:1903201	1	0	78	601	1	18123	TRPM2
GO:BP	negative regulation of calcium ion transmembrane transport	GO:1903170	1	0	48	601	2	18123	SLN,ATP1A2
GO:BP	regulation of calcium ion transmembrane transport	GO:1903169	1	0	165	601	11	18123	SLN,P2RY6,NOS1AP,RGS9,CAV3,CD19,STAC3,ATP1A2,JPH1,AKAP6,RYR2
GO:BP	regulation of autophagy of mitochondrion	GO:1903146	1	0	32	601	1	18123	USP36
GO:BP	mononuclear cell differentiation	GO:1903131	1	0	440	601	22	18123	CCL19,LGALS9,HLA-DRA,CD79B,PIK3R6,CD19,STAT3,HLA-B,C17ORF99,TMEM98,IL7,TSHR,HLA-DQB1,ERBB2,KAT7,TRPM2,CCR7,HDAC5,STAT5B,IRF7,MS4A1,PREX1
GO:BP	protein localization to actin cytoskeleton	GO:1903119	1	0	1	601	1	18123	PPP1R9B
GO:BP	regulation of actin filament-based movement	GO:1903115	1	0	38	601	4	18123	CAV3,JUP,ATP1A2,RYR2
GO:BP	positive regulation of protein localization to plasma membrane	GO:1903078	1	0	64	601	3	18123	PPP1R9B,VIL1,STAC3
GO:BP	positive regulation of oxidative stress-induced cell death	GO:1903209	1	0	19	601	1	18123	TRPM2
GO:BP	regulation of protein localization to plasma membrane	GO:1903076	1	0	107	601	3	18123	PPP1R9B,VIL1,STAC3
GO:BP	regulation of extracellular matrix organization	GO:1903053	1	0	48	601	2	18123	SOX9,RGCC
GO:BP	positive regulation of proteolysis involved in cellular protein catabolic process	GO:1903052	1	0	135	601	3	18123	CAV3,SIRT6,PSMC5
GO:BP	negative regulation of proteolysis involved in cellular protein catabolic process	GO:1903051	1	0	65	601	2	18123	PRKCG,RPL23
GO:BP	regulation of proteolysis involved in cellular protein catabolic process	GO:1903050	1	0	224	601	5	18123	PRKCG,CAV3,SIRT6,RPL23,PSMC5
GO:BP	mitotic cell cycle process	GO:1903047	1	0	956	601	27	18123	CENPM,PPP1R9B,TAOK1,BRCA1,EDN1,ANAPC11,PSMD12,DBF4B,RPTOR,CYP1A1,CCNJ,KPNB1,EME1,CDK3,PSMB10,PSMB3,PKHD1,RAD51C,IQGAP3,BECN1,ARF1,SKA2,SPHK1,ANAPC2,CDK2AP2,PSMC5,RGCC
GO:BP	meiotic cell cycle process	GO:1903046	1	0	200	601	7	18123	PRKAR1A,EME1,SLX4,MOV10L1,SYCE2,RAD51C,RAD51D
GO:BP	positive regulation of leukocyte cell-cell adhesion	GO:1903039	1	0	243	601	15	18123	CCL19,CCL5,LGALS9,RASAL3,HLA-DRA,PIK3R6,GRB2,ICOS,PTAFR,IL7,HLA-A,HLA-DQB1,CCR7,DOCK8,STAT5B
GO:BP	negative regulation of leukocyte cell-cell adhesion	GO:1903038	1	0	144	601	5	18123	LGALS9,PRKAR1A,PPARA,TIGIT,ERBB2
GO:BP	regulation of leukocyte cell-cell adhesion	GO:1903037	1	0	341	601	19	18123	CCL19,CCL5,LGALS9,RASAL3,HLA-DRA,PIK3R6,PRKAR1A,PPARA,GRB2,ICOS,TIGIT,PTAFR,IL7,HLA-A,HLA-DQB1,ERBB2,CCR7,DOCK8,STAT5B
GO:BP	positive regulation of extracellular matrix organization	GO:1903055	1	0	24	601	2	18123	SOX9,RGCC
GO:BP	positive regulation of response to wounding	GO:1903036	1	0	74	601	4	18123	CLDN4,GRN,INSL3,ACTG1
GO:BP	regulation of protein targeting to mitochondrion	GO:1903214	1	0	44	601	2	18123	RAC2,USP36
GO:BP	regulation of leukocyte tethering or rolling	GO:1903236	1	0	14	601	1	18123	PTAFR
GO:BP	regulation of vacuolar transport	GO:1903335	1	0	4	601	1	18123	ARF1
GO:BP	positive regulation of protein folding	GO:1903334	1	0	4	601	1	18123	GRN
GO:BP	regulation of protein folding	GO:1903332	1	0	12	601	2	18123	GRN,HSPA5
GO:BP	positive regulation of protein modification by small protein conjugation or removal	GO:1903322	1	0	142	601	3	18123	BRCA1,HSPA5,SPHK1
GO:BP	negative regulation of protein modification by small protein conjugation or removal	GO:1903321	1	0	99	601	2	18123	PRKCG,RPL23
GO:BP	regulation of protein modification by small protein conjugation or removal	GO:1903320	1	0	248	601	5	18123	BRCA1,HSPA5,PRKCG,RPL23,SPHK1
GO:BP	positive regulation of protein maturation	GO:1903319	1	0	27	601	2	18123	SPON1,TFR2
GO:BP	negative regulation of protein maturation	GO:1903318	1	0	28	601	2	18123	TMEM98,BCL2L12
GO:BP	regulation of protein maturation	GO:1903317	1	0	66	601	4	18123	SPON1,TMEM98,TFR2,BCL2L12
GO:BP	positive regulation of oxidative stress-induced neuron death	GO:1903223	1	0	6	601	1	18123	TRPM2
GO:BP	positive regulation of mRNA metabolic process	GO:1903313	1	0	144	601	2	18123	NT5C3B,PATL1
GO:BP	regulation of mRNA metabolic process	GO:1903311	1	0	384	601	12	18123	NSRP1,PSMD12,IGF2BP1,PSMB10,PSMB3,NT5C3B,DHX34,PATL1,KHDRBS2,ALKBH5,IGF2BP2,PSMC5
GO:BP	positive regulation of regulated secretory pathway	GO:1903307	1	0	53	601	6	18123	HLA-F,KLRC2,ITGAM,PTAFR,ARF1,CACNA1G
GO:BP	negative regulation of regulated secretory pathway	GO:1903306	1	0	23	601	3	18123	LGALS9,HLA-F,STXBP3
GO:BP	regulation of regulated secretory pathway	GO:1903305	1	0	145	601	12	18123	LGALS9,DGKI,PRKCG,HLA-F,KLRC2,ITGAM,PTAFR,ADCY1,RAC2,ARF1,CACNA1G,STXBP3
GO:BP	positive regulation of potassium ion import across plasma membrane	GO:1903288	1	0	7	601	1	18123	WNK2
GO:BP	regulation of potassium ion import	GO:1903286	1	0	8	601	1	18123	WNK2
GO:BP	negative regulation of calcium:sodium antiporter activity	GO:1903280	1	0	1	601	1	18123	ATP1A2
GO:BP	regulation of calcium:sodium antiporter activity	GO:1903279	1	0	3	601	1	18123	ATP1A2
GO:BP	positive regulation of leukocyte tethering or rolling	GO:1903238	1	0	9	601	1	18123	PTAFR
GO:BP	negative regulation of mRNA metabolic process	GO:1903312	1	0	95	601	2	18123	IGF2BP1,DHX34
GO:BP	positive regulation of vacuolar transport	GO:1903337	1	0	2	601	1	18123	ARF1
GO:BP	negative regulation of response to wounding	GO:1903035	1	0	99	601	2	18123	EDN1,ABCC8
GO:BP	positive regulation of glycoprotein metabolic process	GO:1903020	1	0	29	601	2	18123	CCL19,CCR7
GO:BP	positive regulation of cell cycle G1/S phase transition	GO:1902808	1	0	57	601	4	18123	RPTOR,CYP1A1,RGCC,STXBP4
GO:BP	negative regulation of cell cycle G1/S phase transition	GO:1902807	1	0	133	601	2	18123	CDK2AP2,RGCC
GO:BP	regulation of cell cycle G1/S phase transition	GO:1902806	1	0	205	601	5	18123	RPTOR,CYP1A1,CDK2AP2,RGCC,STXBP4
GO:BP	late endosome to lysosome transport	GO:1902774	1	0	9	601	1	18123	ARF1
GO:BP	positive regulation of cell cycle G2/M phase transition	GO:1902751	1	0	30	601	2	18123	DBF4B,RAD51C
GO:BP	negative regulation of cell cycle G2/M phase transition	GO:1902750	1	0	101	601	6	18123	TAOK1,BRCA1,PSMD12,PSMB10,PSMB3,PSMC5
GO:BP	regulation of cell cycle G2/M phase transition	GO:1902749	1	0	213	601	8	18123	TAOK1,BRCA1,PSMD12,DBF4B,PSMB10,PSMB3,RAD51C,PSMC5
GO:BP	positive regulation of lamellipodium organization	GO:1902745	1	0	37	601	3	18123	VIL1,ENPP2,RAC2
GO:BP	regulation of lamellipodium organization	GO:1902743	1	0	56	601	3	18123	VIL1,ENPP2,RAC2
GO:BP	regulation of late endosome to lysosome transport	GO:1902822	1	0	4	601	1	18123	ARF1
GO:BP	positive regulation of chondrocyte proliferation	GO:1902732	1	0	7	601	2	18123	SOX9,SIRT6
[truncated: 4,560 more rows]

## Sheet: Lower dermis
source	term_name	term_id	adjusted_p_value	negative_log10_of_adjusted_p_value	term_size	query_size	intersection_size	effective_domain_size	intersections
[truncated: 5,476 more rows]
