# Supplementary figures and images for: Role of distinct fibroblast lineages and immune cells in dermal repair following UV radiation-induced tissue damage
Source: eLife journal article supplement (doi:10.7554/elife.71052), 2021-12-23

Figure 1 – figure supplement 1

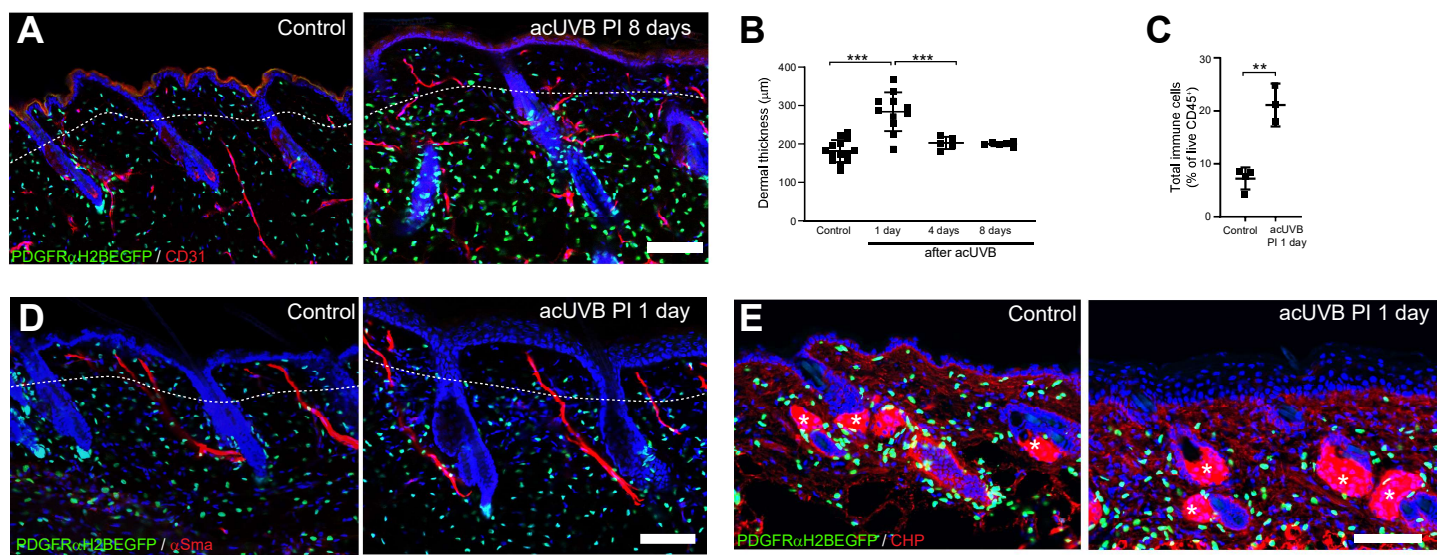

Supplement: supp [file elife-71052-supp-v1.zip › elife_poa_e71052_Figure_1_figure_supplement_1.pdf]

Figure 1 – figure supplement 2

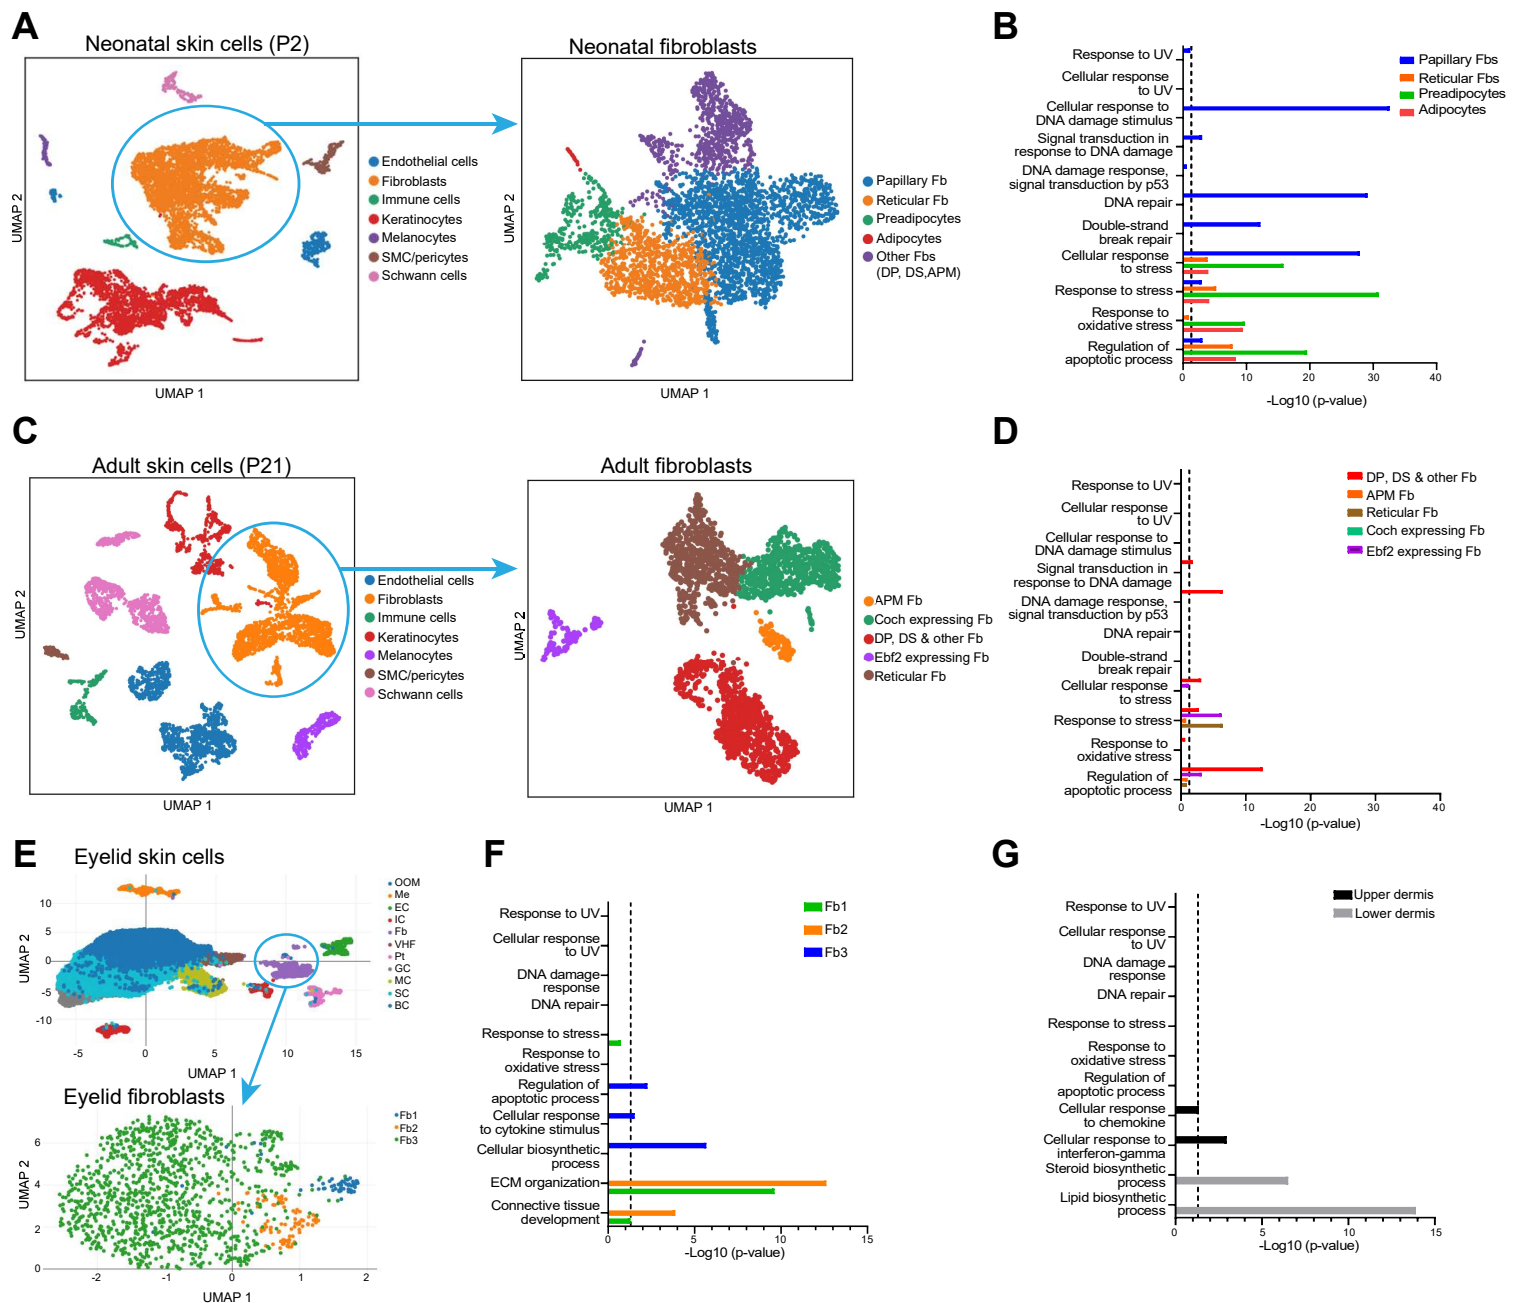

Supplement: supp [file elife-71052-supp-v1.zip › elife_poa_e71052_Figure_1_figure_supplement_2.pdf]

Figure 2 – figure supplement 1

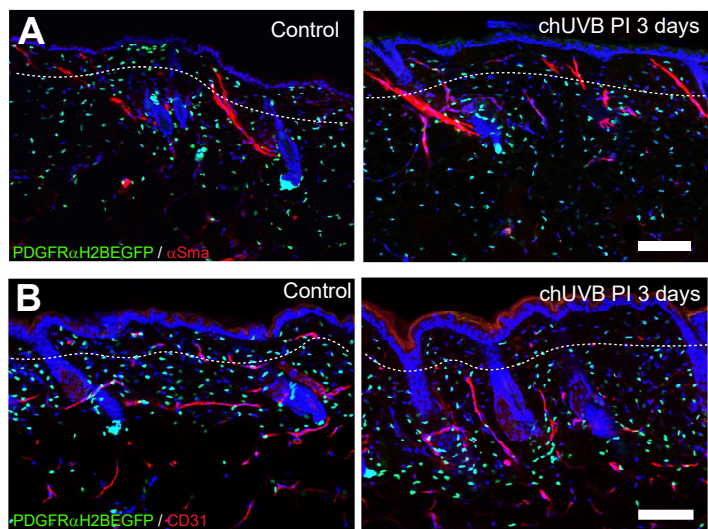

Supplement: supp [file elife-71052-supp-v1.zip › elife_poa_e71052_Figure_2_figure_supplement_1.pdf]

Figure 3 – figure supplement 1

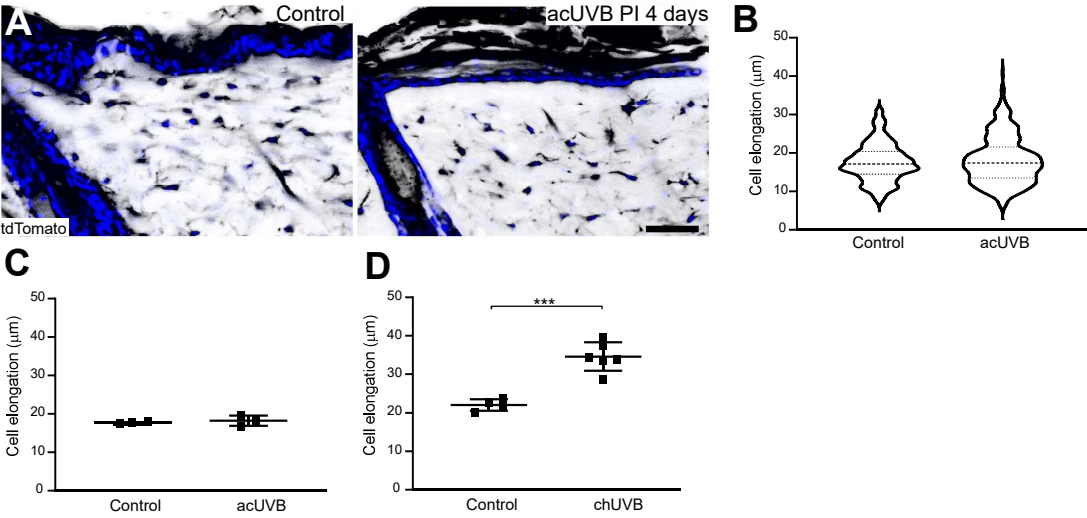

Supplement: supp [file elife-71052-supp-v1.zip › elife_poa_e71052_Figure_3_figure_supplement_1.pdf]

Figure 4 – figure supplement 1

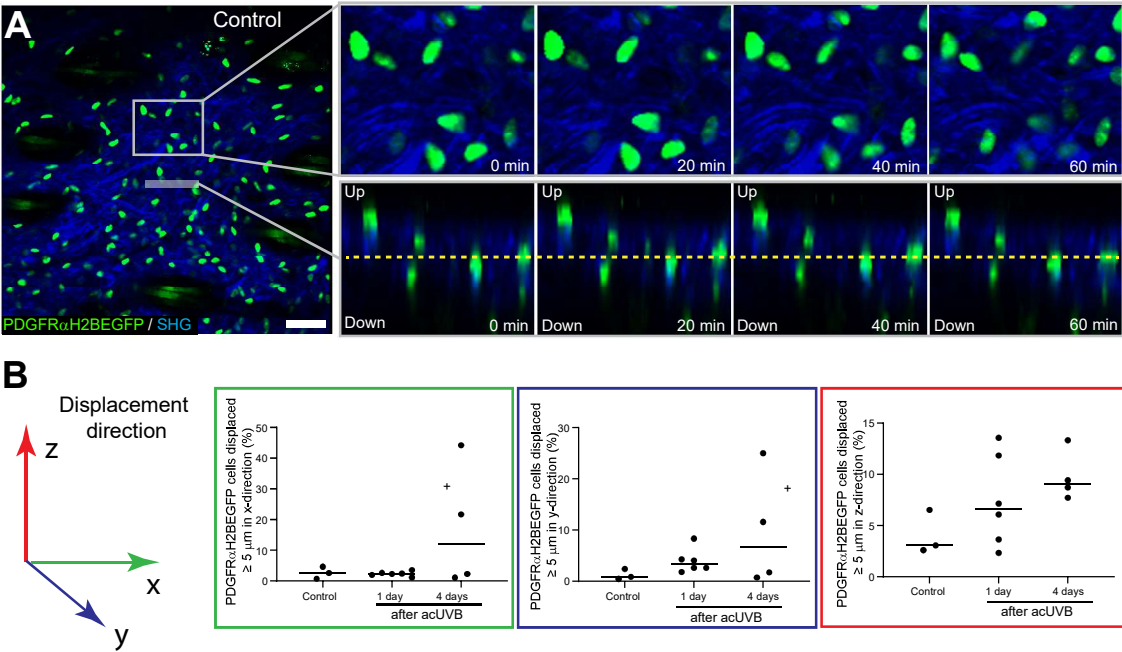

Supplement: supp [file elife-71052-supp-v1.zip › elife_poa_e71052_Figure_4_figure_supplement_1.pdf]

Figure 5 – figure supplement 1

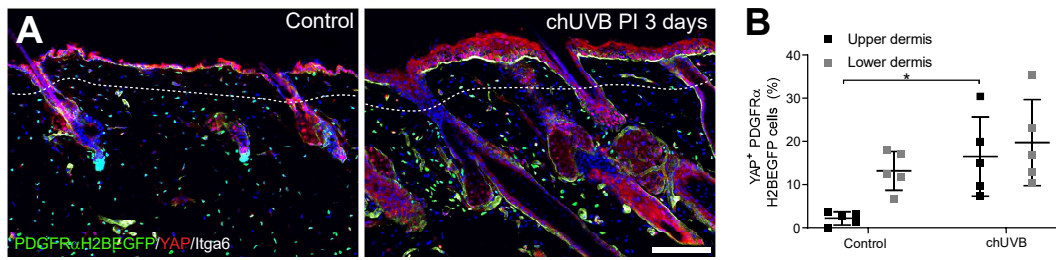

Supplement: supp [file elife-71052-supp-v1.zip › elife_poa_e71052_Figure_5_figure_supplement_1.pdf]

Figure 6 – figure supplement 1

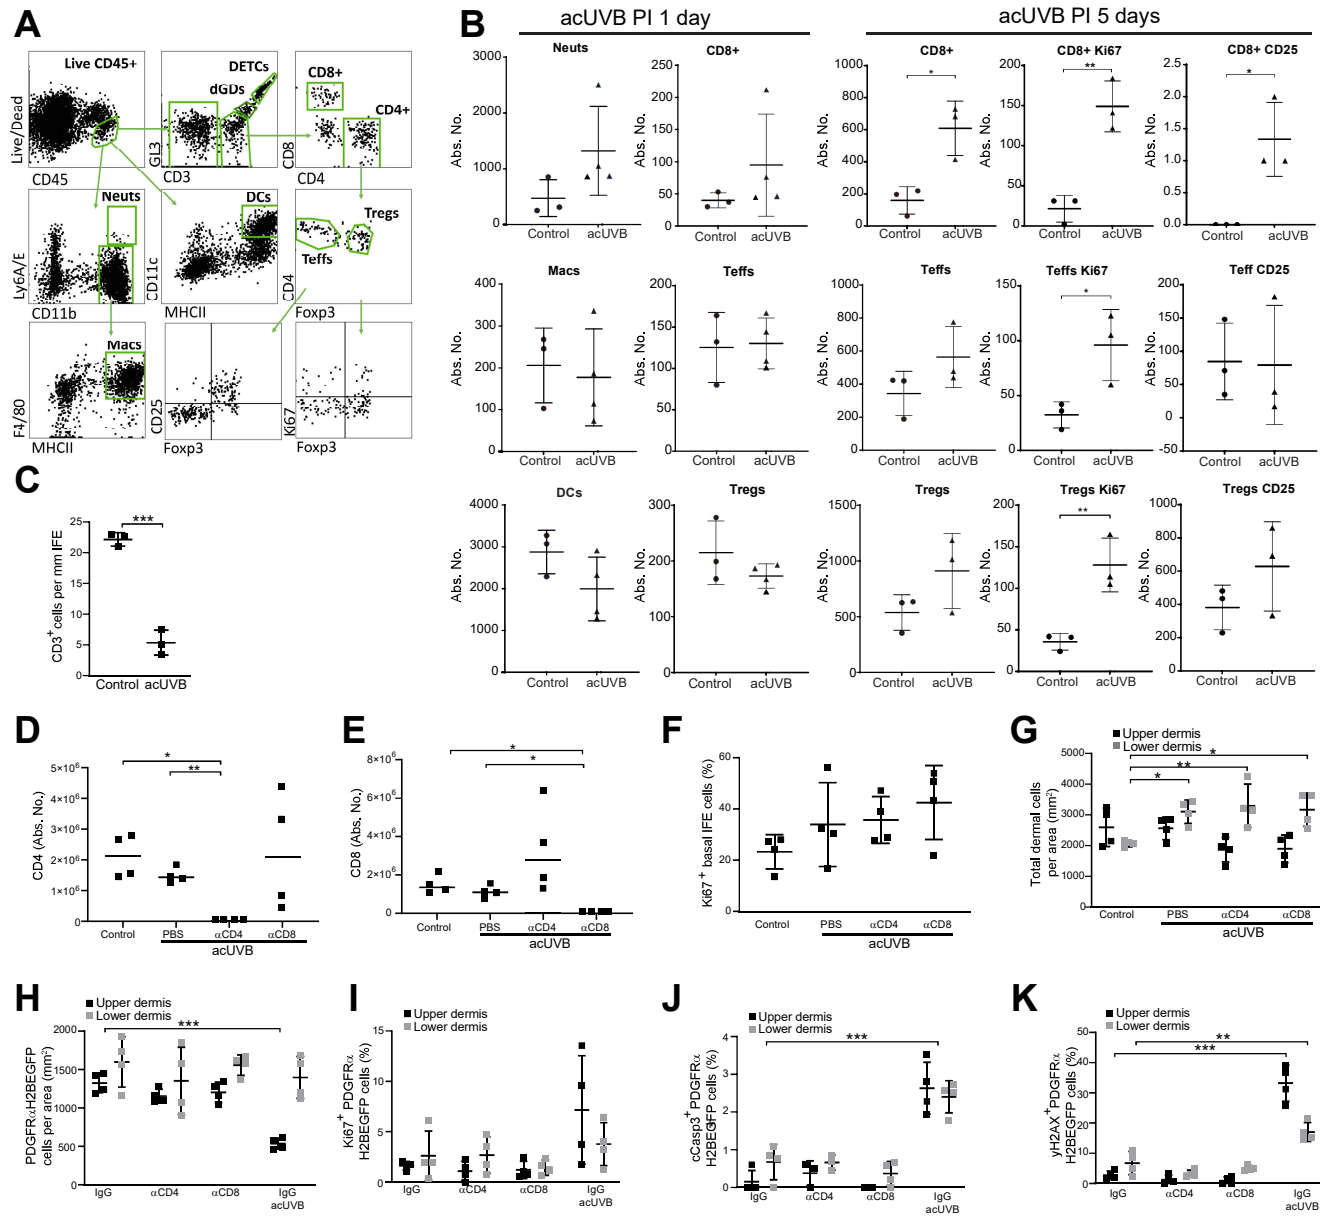

Supplement: supp [file elife-71052-supp-v1.zip › elife_poa_e71052_Figure_6_figure_supplement_1.pdf]
